# Supplementary material for: Synthesis and ethylene-promoted metathesis of adducts of tandem [4+2]/[4+2] cycloaddition between bis-furyl dienes and maleic acid derivatives
Source: Royal Society of Chemistry journal article supplement (doi:10.1039/d0nj04528d), 2021-01-01

## Supporting Information for the paper

### Synthesis and Ethylene-Promoted Metathesis of Adducts of Tandem [4+2]/[4+2] Cycloaddition between *bis*-Furyl Dienes and Maleic Acid Derivatives

Elizaveta A. Kvyatkovskaya, Polina P. Epifanova, Eugeniya V. Nikitina, Aleksey A.  
Senin, Victor N. Khrustalev, Kirill B. Polyanskii, Fedor I. Zubkov

e-mail: fzubkov@sci.pfu.edu.ru and 1236tgp@mail.ru

|          |                                                                                |            |
|----------|--------------------------------------------------------------------------------|------------|
| <b>1</b> | <b>X-ray crystal structure determination for compounds 3f, 4e, 6b, 6f, 14c</b> | <b>S2</b>  |
| <b>2</b> | <b>Experimental part</b>                                                       | <b>S10</b> |
| <b>3</b> | <b>Copies of NMR spectra</b>                                                   | <b>S63</b> |

## 1. X-ray crystal structure determination for compounds **3f**, **4e**, **6b**, **6f**, **14c**

Single crystals for X-ray crystallography were grown by slow recrystallization of samples from *i*-PrOH/DMF (for adducts **3f**, **4e**, **6b**, **6f**) or EtOAc/hexane (for compound **14c**) mixtures. Suitable single crystals were selected, immersed in an inert oil, mounted on a nylon loop and attached to a goniometer head.

X-ray diffraction data for **3f**, **6b**, **6f** and **14c** were collected on a three-circle Bruker D8 QUEST PHOTON-III CCD diffractometer (MoK $\alpha$ -radiation, graphite monochromator,  $\varphi$  and  $\omega$  scan mode) and corrected for absorption using the *SADABS* program.<sup>1</sup> The data were indexed and integrated using the *SAINT* program.<sup>2</sup>

X-ray diffraction data for **4e** were collected at the ‘Belok’ beamline ( $\lambda = 0.96990$  Å) of the Synchrotron Radiation Source at the National Research Center “Kurchatov institute”. In total, 720 frames were collected with an oscillation range of 1.0° in the  $\varphi$  scanning mode using two different orientations. The semi-empirical correction for absorption was applied using the *Scala* program.<sup>3</sup> The data were indexed and integrated using the utility *iMOSFLM* from the CCP4 software suite.<sup>4</sup> For details, see Table S1.

The structures were solved by intrinsic phasing modification of direct methods<sup>5</sup> and refined by a full-matrix least-squares technique on  $F^2$  with anisotropic displacement parameters for all non-hydrogen atoms. The crystals of **6f** and **14c** contained the strongly disordered hexane and ethyl acetate solvate molecules within the unit cell. All attempts to refine their positions were unsuccessful. The contribution of these molecules into the total scattering was removed by use of the *SQUEEZE* procedure<sup>6</sup> implemented in PLATON software.<sup>7</sup> The hydrogen atoms were placed in calculated positions and refined within the riding model with fixed isotropic displacement parameters [ $U_{\text{iso}}(\text{H}) = 1.5U_{\text{eq}}(\text{C})$  for the methyl groups and  $1.2U_{\text{eq}}(\text{C})$  for the other groups]. All calculations were carried out using the SHELXTL program.<sup>8,9</sup>

Crystallographic data for **3f**, **4e**, **6b**, **6f** and **14c** (Fig. S1–S5) have been deposited

with the Cambridge Crystallographic Data Center, CCDC 2026167–2026171, respectively. Copies of this information may be obtained free of charge from the Director, CCDC, 12 Union Road, Cambridge CB2 1EZ, UK (fax: +44 1223 336033; e-mail: deposit@ccdc.cam.ac.uk or www.ccdc.cam.ac.uk).

## References

1. L. Krause, R. Herbst-Irmer, G. M. Sheldrick, and D. Stalke, *J. Appl. Cryst.* 2015, **48**, 3–10.
2. Bruker, *SAINT*, v. 8.29A, Bruker AXS Inc., Madison, WI, 2013.
3. P. R. Evans, *Acta Crystallogr.* 2006, **D62**, 72–82.
4. T. G. G. Battye, L. Kontogiannis, O. Johnson, H. R. Powell, and A. G. W. Leslie, *Acta Crystallogr.* 2011, **D67**, 271–281.
5. M. D. Winn, C. C. Ballard, K. D. Cowtan, E. J. Dodson, P. Emsley, P. R. Evans, R. M. Keegan, E. B. Krissinel, A. G. W. Leslie, A. McCoy, S. J. McNicholas, G. N. Murshudov, N. S. Pannu, E. A. Potterton, H. R. Powell, R. J. Read, A. Vagin, and K. S. Wilson, *Acta Crystallogr.* 2011, **D67**, 235–242.
6. A. L. Spek, *Acta Crystallographica* 2015, **C71**, 9–18.
7. A. L. Spek, *J. Appl. Crystallogr.* 2003, **36**, 7–13.
8. G. M. Sheldrick, *Acta Crystallogr.* 2015, **A71**, 3–8.
9. G. M. Sheldrick, *Acta Crystallogr.* 2015, **C71**, 3–8.

**Table S1.** Crystal data and structure refinement for products **3f**, **4e**, **6b**, **6f** and **14c**.

| Identification code | <b>3f</b>                                      | <b>4e</b>                                       | <b>6b</b>                                                     | <b>6f</b>                                                     | <b>14c</b>                                                    |
|---------------------|------------------------------------------------|-------------------------------------------------|---------------------------------------------------------------|---------------------------------------------------------------|---------------------------------------------------------------|
| Empirical formula   | C <sub>14</sub> H <sub>12</sub> O <sub>6</sub> | C <sub>15</sub> H <sub>15</sub> NO <sub>5</sub> | C <sub>25</sub> H <sub>26</sub> N <sub>2</sub> O <sub>6</sub> | C <sub>27</sub> H <sub>22</sub> N <sub>2</sub> O <sub>5</sub> | C <sub>24</sub> H <sub>24</sub> N <sub>2</sub> O <sub>6</sub> |
| Formula weight      | 276.24                                         | 289.28                                          | 450.48                                                        | 454.47                                                        | 436.45                                                        |

|                                                                             |                                                                     |                                                                   |                                                                     |                                                                     |                                                                   |
|-----------------------------------------------------------------------------|---------------------------------------------------------------------|-------------------------------------------------------------------|---------------------------------------------------------------------|---------------------------------------------------------------------|-------------------------------------------------------------------|
| Temperature, K                                                              | 100(2)                                                              | 100(2)                                                            | 100(2)                                                              | 100                                                                 | 100                                                               |
| Crystal size, mm                                                            | 0.15×0.10×0.10                                                      | 0.25×0.15×0.10                                                    | 0.25×0.25×0.05                                                      | 0.30×0.30×0.30                                                      | 0.25×0.05×0.05                                                    |
| Wavelength, Å                                                               | 0.71073                                                             | 0.96990                                                           | 0.71073                                                             | 0.71073                                                             | 0.71073                                                           |
| Crystal system                                                              | Monoclinic                                                          | Monoclinic                                                        | Monoclinic                                                          | Orthorhombic                                                        | Monoclinic                                                        |
| Space group                                                                 | <i>Cc</i>                                                           | <i>Pc</i>                                                         | <i>P2<sub>1</sub>/n</i>                                             | <i>Pbca</i>                                                         | <i>C2/c</i>                                                       |
| <i>a</i> , Å                                                                | 10.6953(2)                                                          | 16.625(3)                                                         | 8.5916(3)                                                           | 9.8725(2)                                                           | 32.910(4)                                                         |
| <i>b</i> , Å                                                                | 10.0575(2)                                                          | 7.2251(14)                                                        | 18.4981(5)                                                          | 16.5515(3)                                                          | 5.5297(7)                                                         |
| <i>c</i> , Å                                                                | 11.2520(2)                                                          | 10.625(2)                                                         | 13.3949(4)                                                          | 29.9337(6)                                                          | 26.685(4)                                                         |
| $\alpha$ , deg.                                                             | 90                                                                  | 90                                                                | 90                                                                  | 90                                                                  | 90                                                                |
| $\beta$ , deg.                                                              | 113.454(1)                                                          | 92.13(3)                                                          | 90.676(1)                                                           | 90                                                                  | 106.912(3)                                                        |
| $\gamma$ , deg.                                                             | 90                                                                  | 90                                                                | 90                                                                  | 90                                                                  | 90                                                                |
| <i>V</i> , Å <sup>3</sup>                                                   | 1110.36(4)                                                          | 1275.4(4)                                                         | 2128.68(11)                                                         | 4891.31(17)                                                         | 4646.2(11)                                                        |
| <i>Z</i>                                                                    | 4                                                                   | 4                                                                 | 4                                                                   | 8                                                                   | 8                                                                 |
| Density (calc.), Mg/mm <sup>3</sup>                                         | 1.653                                                               | 1.507                                                             | 1.406                                                               | 1.234                                                               | 1.248                                                             |
| $\mu$ , mm <sup>-1</sup>                                                    | 0.131                                                               | 0.244                                                             | 0.101                                                               | 0.086                                                               | 0.090                                                             |
| <i>F</i> (000)                                                              | 576                                                                 | 608                                                               | 952                                                                 | 1904                                                                | 1840                                                              |
| $\theta$ range, deg.                                                        | 3.008-32.579                                                        | 3.347-35.996                                                      | 2.614-32.582                                                        | 2.471-32.605                                                        | 2.587-26.357                                                      |
| Index ranges                                                                | -16 ≤ <i>h</i> ≤ 16,<br>-15 ≤ <i>k</i> ≤ 15,<br>-17 ≤ <i>l</i> ≤ 17 | -20 ≤ <i>h</i> ≤ 20,<br>-8 ≤ <i>k</i> ≤ 8,<br>-11 ≤ <i>l</i> ≤ 11 | -13 ≤ <i>h</i> ≤ 13,<br>-28 ≤ <i>k</i> ≤ 28,<br>-20 ≤ <i>l</i> ≤ 20 | -14 ≤ <i>h</i> ≤ 14,<br>-25 ≤ <i>k</i> ≤ 25,<br>-45 ≤ <i>l</i> ≤ 45 | -40 ≤ <i>h</i> ≤ 40,<br>-6 ≤ <i>k</i> ≤ 6,<br>-33 ≤ <i>l</i> ≤ 33 |
| Reflections collected                                                       | 12197                                                               | 11008                                                             | 37982                                                               | 118382                                                              | 28546                                                             |
| Independent reflections                                                     | 4021 ( <i>R</i> <sub>int</sub> = 0.0272)                            | 4262 ( <i>R</i> <sub>int</sub> = 0.1056)                          | 7728 ( <i>R</i> <sub>int</sub> = 0.0619)                            | 8883 ( <i>R</i> <sub>int</sub> = 0.0532)                            | 4692 ( <i>R</i> <sub>int</sub> = 0.1058)                          |
| Reflections observed                                                        | 3854                                                                | 3252                                                              | 5406                                                                | 7091                                                                | 2547                                                              |
| <i>R</i> <sub>1</sub> / <i>wR</i> <sub>2</sub> ( <i>I</i> > 2σ( <i>I</i> )) | 0.0295 / 0.0739                                                     | 0.1082 / 0.2459                                                   | 0.0489 / 0.1142                                                     | 0.0433 / 0.1093                                                     | 0.0628 / 0.1332                                                   |
| <i>R</i> <sub>1</sub> / <i>wR</i> <sub>2</sub> (all data)                   | 0.0316 / 0.0752                                                     | 0.1283 / 0.2632                                                   | 0.0800 / 0.1335                                                     | 0.0590 / 0.1206                                                     | 0.1329 / 0.1667                                                   |
| Goodness-of-fit on <i>F</i> <sup>2</sup>                                    | 1.039                                                               | 1.026                                                             | 1.014                                                               | 1.024                                                               | 1.000                                                             |
| Extinction coefficient                                                      | —                                                                   | 0.048(4)                                                          | —                                                                   | —                                                                   | —                                                                 |
| <i>T</i> <sub>min</sub> / <i>T</i> <sub>max</sub>                           | 0.979 / 0.972                                                       | 0.969 / 0.927                                                     | 0.990 / 0.969                                                       | 0.966 / 0.966                                                       | 0.990 / 0.969                                                     |
| $\Delta\rho_{\max} / \Delta\rho_{\min}$ , eÅ <sup>-3</sup>                  | 0.352 / -0.173                                                      | 1.201 / -0.511                                                    | 0.413 / -0.357                                                      | 0.392 / -0.248                                                      | 0.218 / -0.295                                                    |

**Figure S1.** Molecular structure of **3f**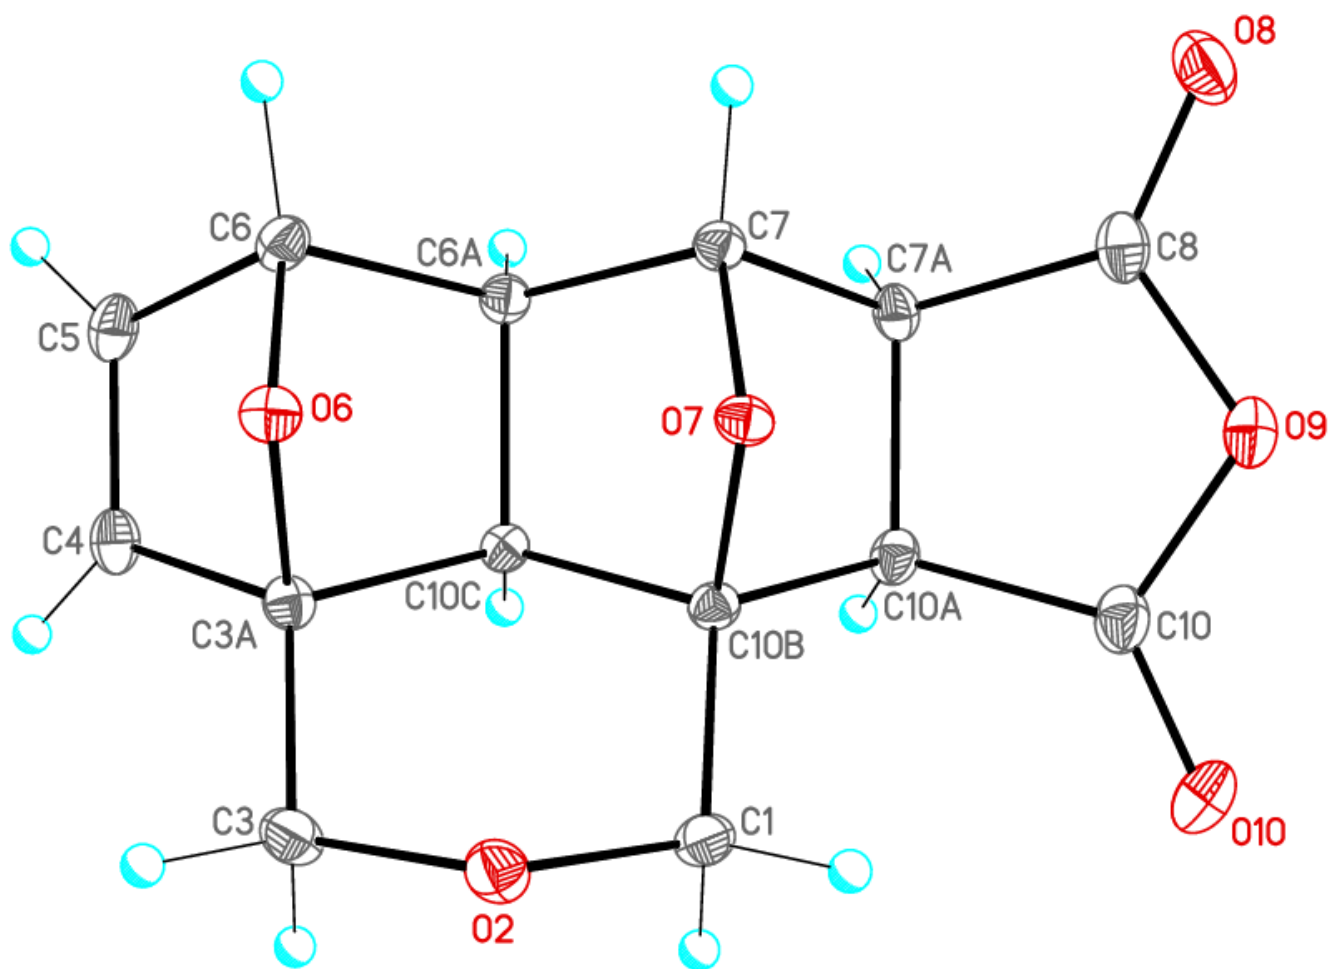

**Figure S2.** Molecular structure of **4e**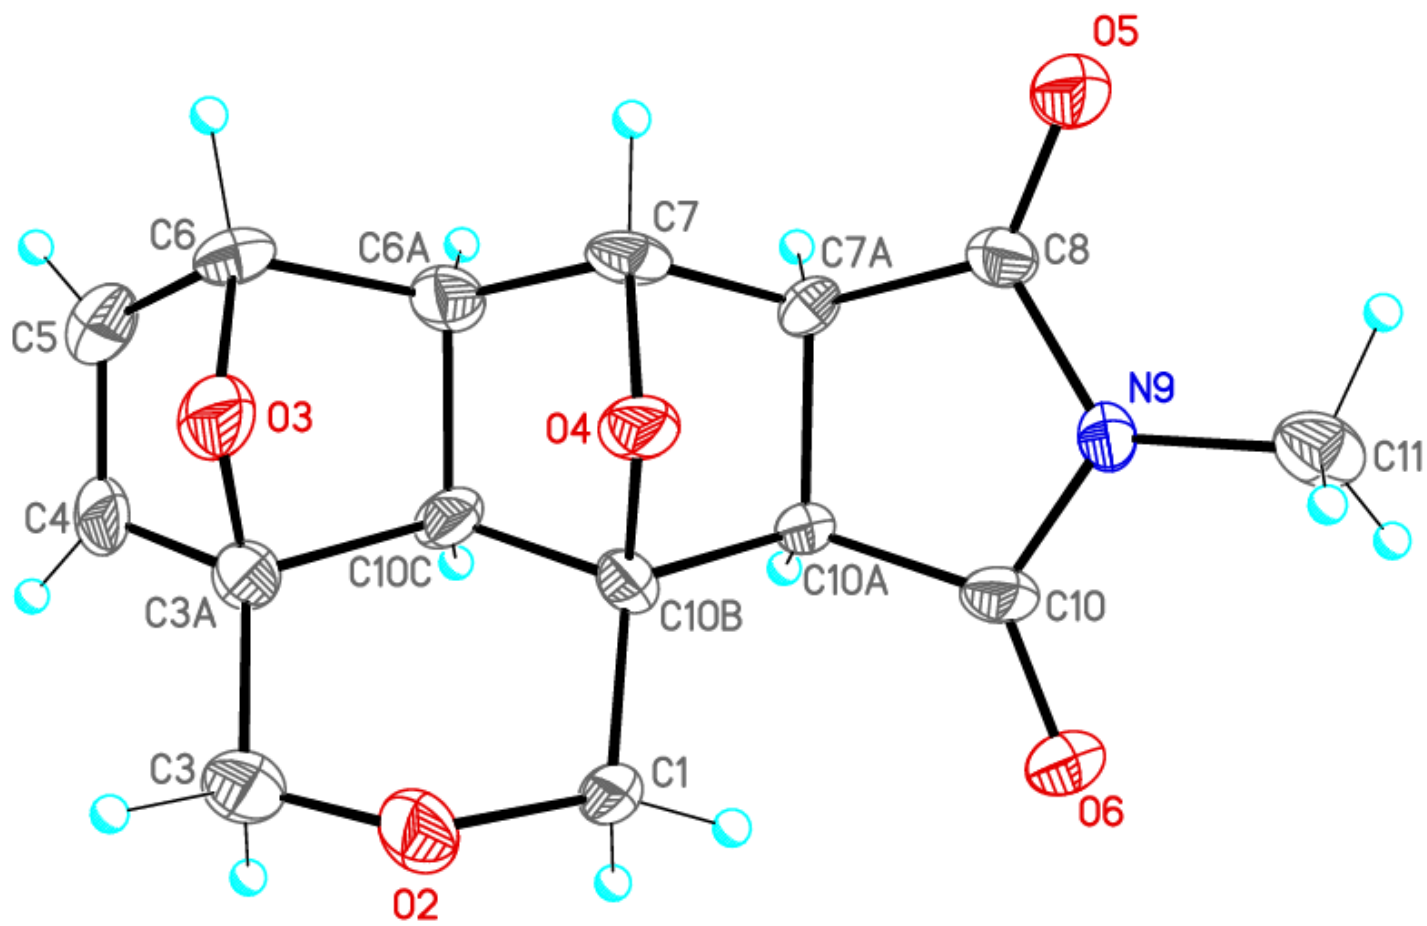

**Figure S3.** Molecular structure of **6b**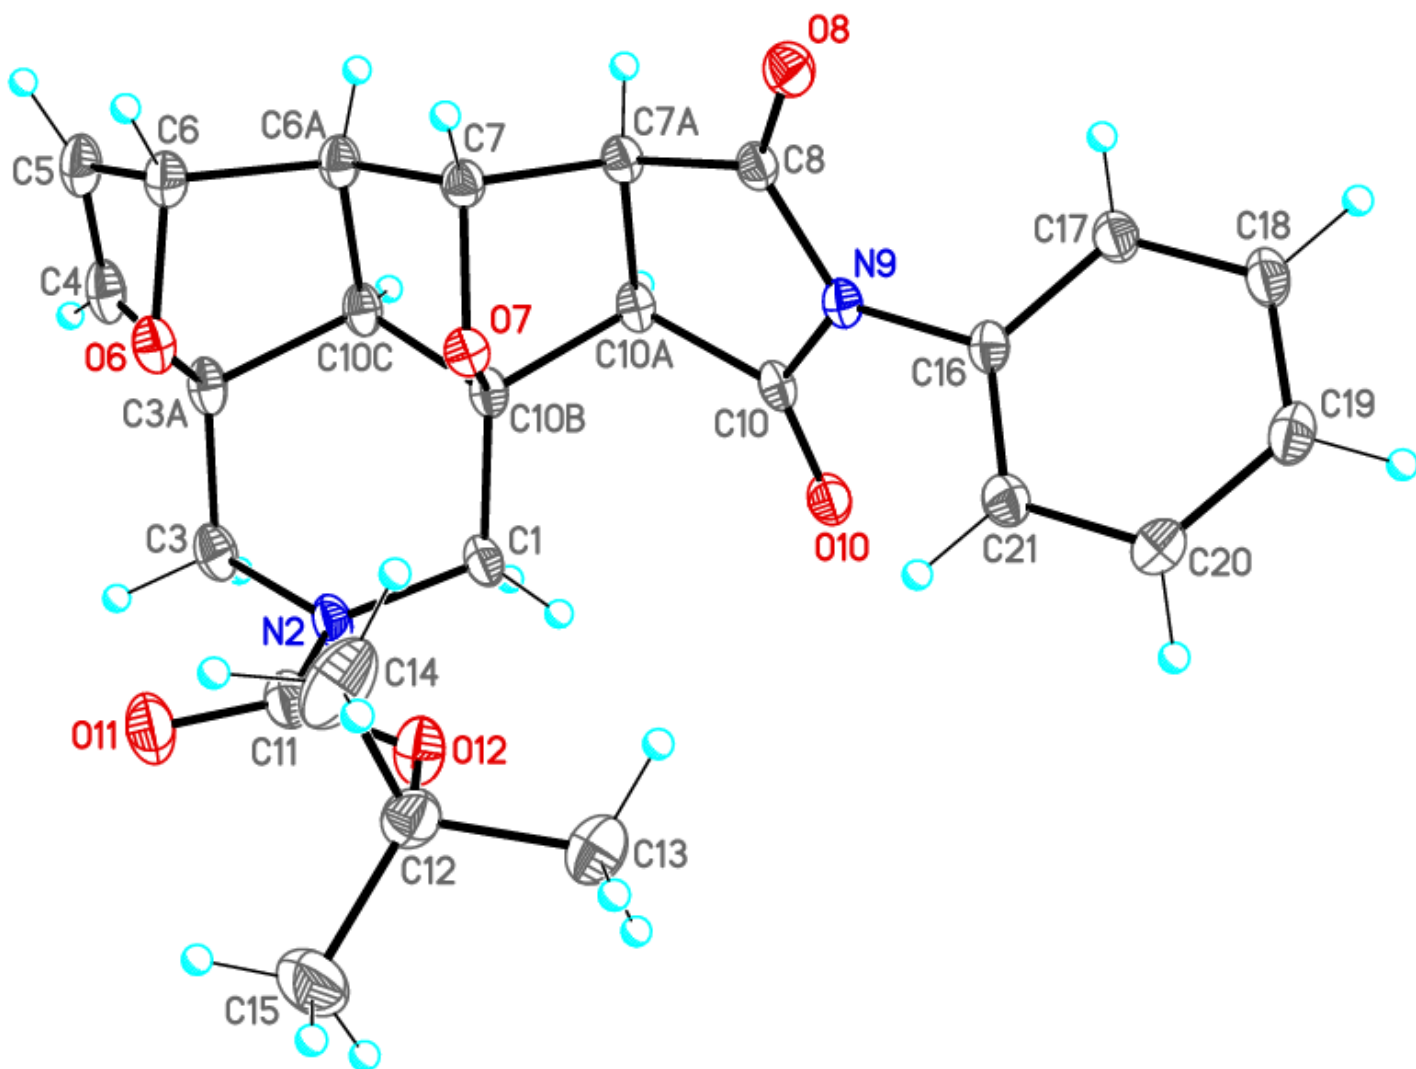

**Figure S4.** Molecular structure of **6f**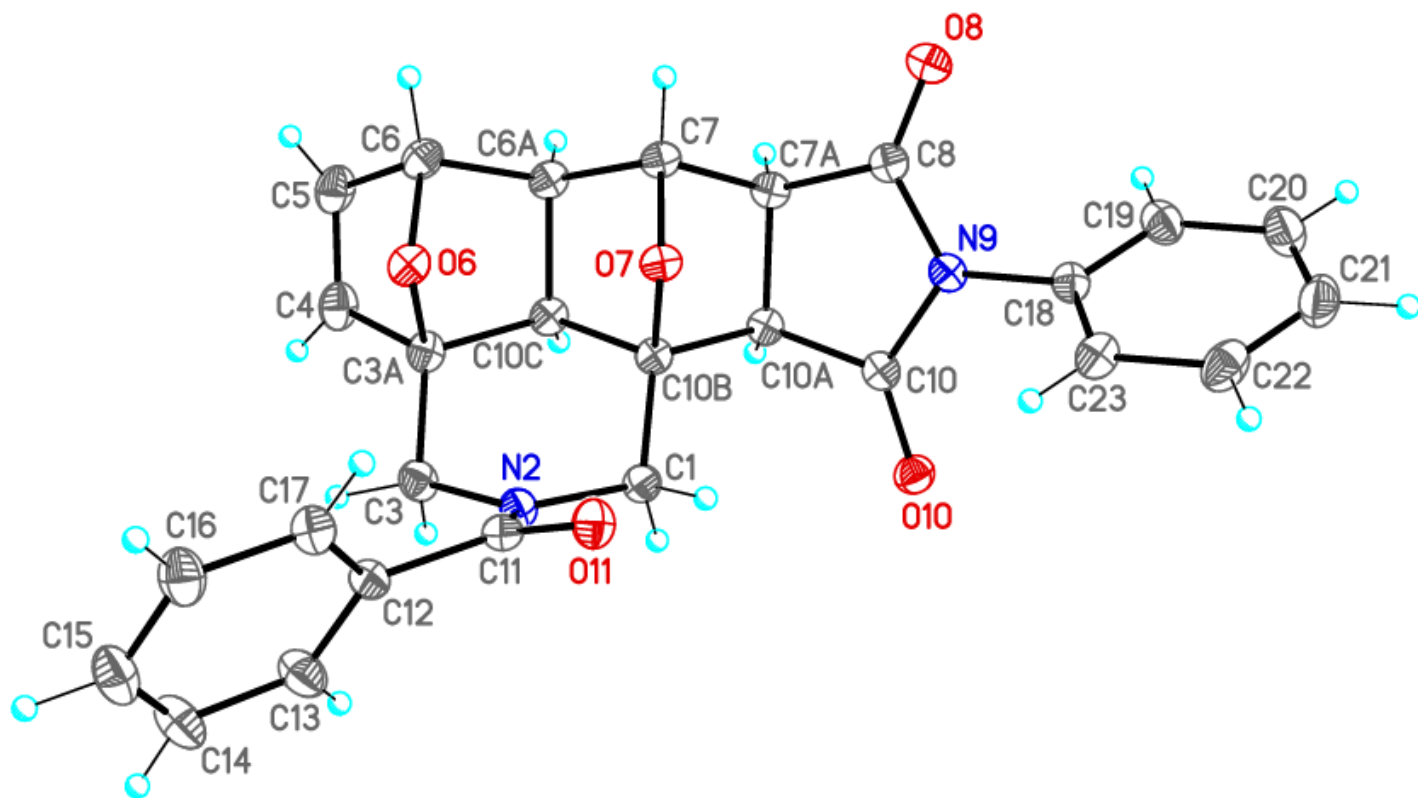



**Figure S5.** Molecular structure of **14c**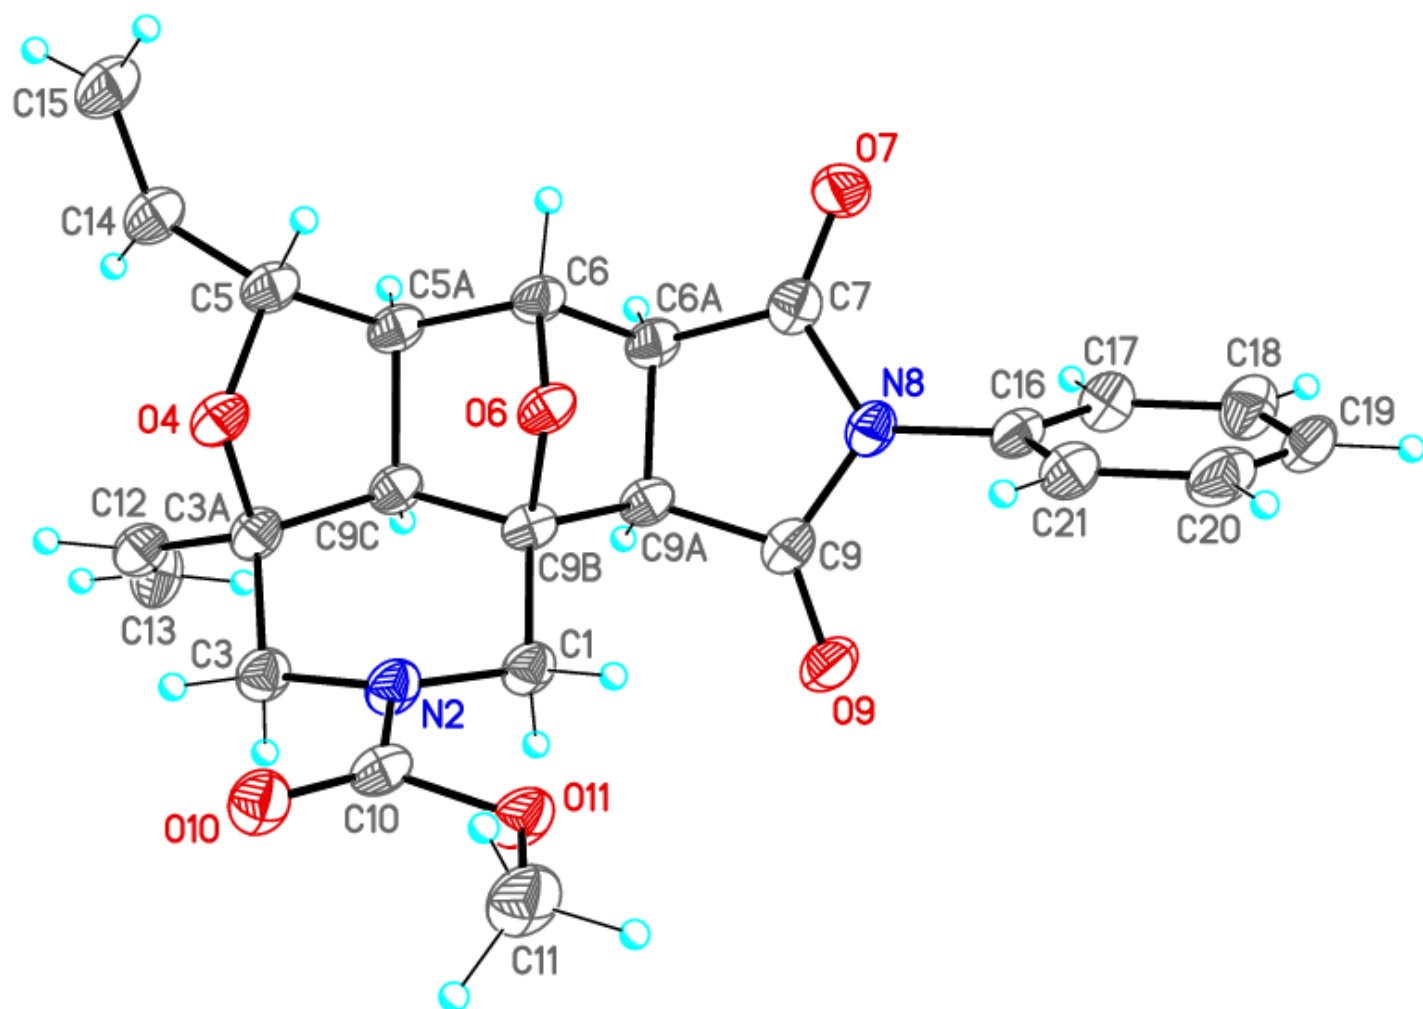

## 2. Experimental part

**General Methods.** All commercially available reagents and solvents were used without further purification (exception of ethylene and  $\text{CH}_2\text{Cl}_2$ , see below). Melting points were measured on a capillary point apparatus equipped with a digital thermometer and were uncorrected.  $^1\text{H}$  NMR,  $^{13}\text{C}$  NMR and  $^{19}\text{F}$  NMR spectra were recorded on 300, 400, 600, 700 (for  $^1\text{H}$ ), 100, 151.9, 176 (for  $^{13}\text{C}$ ) and 282 (for  $^{19}\text{F}$ ) MHz spectrometers, with TMS ( $^1\text{H}$  and  $^{13}\text{C}$  NMR) and  $\text{CCl}_3\text{F}$  ( $^{19}\text{F}$  NMR) as the internal standard, using  $\text{CDCl}_3$  and  $\text{DMSO-}d_6$  as solvents. Data for  $^1\text{H}$  NMR spectra are reported as follows: chemical shift  $\delta$  (ppm), referenced to TMS; multiplicities are indicated as the following: s, singlet; d, doublet; t, triplet; q, quartet; m, multiplet; dd, doublet of doublets; coupling constants (Hz) and integration. Data for  $^{13}\text{C}$  NMR spectra are reported in terms of chemical shift  $\delta$  (ppm) relative to residual solvent peaks. Data for  $^{19}\text{F}$  NMR spectra are reported as follows: chemical shift  $\delta$  (ppm), referenced to  $\text{CCl}_3\text{F}$ ; multiplicities are indicated as the following: s, singlet and coupling constants (Hz). IR spectra were obtained in KBr pellets or in thin films using an Infracum FT-801 IR-Fourier spectrometer. Mass spectra were taken either on Thermo Focus DSQ II (electron ionization, 70 eV, ion source temperature 200 °C, gas chromatographic inlet with Varian FactorFour VF-5ms column) or Thermo Trace DSQ (electron ionization, 70 eV, ion source temperature was 200 °C, direct inlet probe) spectrometers. High-resolution mass spectra (HRMS) were recorded on an Agilent mass spectrometer, using ESI-TOF (electrospray ionization-time of flight). Analytical TLC was performed on silica plates Sorbfil.

### Materials and equipment for metathesis reactions

It was used following solvent:  $\text{CH}_2\text{Cl}_2$  (99.9% +, Khimmed OJSC, Russia), what was immediately passed through an alumina layer 1 cm thick even before the ethenolysis reaction.

The equipment for carrying out ethenolysis reactions was assembled on the basis of the Parr Multiple Reactor System Series 5000 (Parr), including a 75 mL autoclave with a magnetic stirrer and electric heating. For submission, temperature and pressure were monitored using electronic sensors, data from which are output to a computer monitor from which the unit is controlled.

### **Description and order of work at the equipment**

The unit is designed to carry out the ethenolysis reaction (metathesis) at a pressure of 1 to 5 bar and a temperature of 40 to 100 °C in a batch operation in the presence of homogeneous catalysts.

The plant consists of the following units:

1. Gas purification block.
2. The reaction block.

### **Gas purification block**

#### ***Argon purification***

High purity argon (99.9% +) was used in all experiments, which was preliminarily passed through three series-connected columns filled with zeolites (3A and 13X) and CuO (reduced to Cu).

#### ***Ethylene purification***

Ethylene (Linde Gas, 99.9% +) was used in all experiments, which was preliminarily passed through three series-connected columns filled with activated carbon and zeolites (3A and 13X).

#### ***Sorbent regeneration in columns***

Regeneration of zeolites was carried out without unloading from the columns in a stream of argon at a temperature of 320 °C for 3–5 h. Activated carbon was regenerated in a stream of argon at a temperature of 270 °C for 3–5 h. Copper oxide was reduced in a stream of hydrogen for 20 h at temperature of 220–240 °C.

### **Reactor block**

The reactor is an autoclave of stainless steel T316SS with a volume of 75 cm<sup>3</sup> (Multiple Reactor System Series 5000, Parr), which allows testing at temperatures up to 225 °C and pressures up to 200 bar. Mixing is carried out by the anchor of a magnetic stirrer with a Teflon coating with a stirrer speed of up to 1200 rpm. The process is controlled from a personal computer.

### **Work sequence at the plant**

*Checking for leaks in cleaning systems. Since flammable gas - ethylene is used in the experiment, it is necessary to observe fire safety measures when working with flammable gases.*

After the cleaning systems are assembled, gas cylinders are connected to them. The high pressure reducers **PIC1** and **PIC2** are then purged to remove residual air from them. To do this, open the valves on the cylinder and set the minimum pressure on the gearboxes when the three-way valves V1 and V9 are in the reset position and blow the line section for 1 min. After that, the valves V1 and V9 are turned into the gas supply position to the line and the pressure reducers **PIC1** and **PIC2** are set to 5–10 bar above the working pressure. Alternately open the valves on the cleaning line to the ball valves V5 and V14 (with closed valves on the cylinders) and monitor the pressure change on the pressure gauge of the gearboxes **PIC1** and **PIC2**. If the pressure does not drop within 15–20 min, then there is no flow and you can proceed with the experiment (Fig. S6).

### **Experiment**

The dried autoclave is charged with the starting material, solvent and catalyst solution. Close the lid of the autoclave and connect it to the gas supply line. A leak test is carried out: for this, all valves and ball valves V16 and V17 are opened on the argon line, while the ethylene supply valves V7 and V8, as well as the gas discharge valves on the autoclave V18 and V19, must be closed. On a **PIC4** gearbox, argon pressure is set to 5 bar above the working one. After the pressure has accumulated, close the ball valve V15 and monitor the performance of the electronic pressure transmitter **PI**. If the pressure in the autoclave **R** does not drop for 15 minutes, then argon pressure is slowly released by opening the ball valve V18 and the fine adjustment valve V19. Then close the relief valves and gain ethylene pressure for purging: for this, open the valves V7 and V8 and set the ethylene pressure to 2 bar on the **PIC2** gearbox, then close the ball valve V7 and open the relief valves, repeat the procedure 5 times. After that, the working pressure of ethylene is set on the **PIC2** reducer and stirring is turned on. After 5 minutes, valves V7 and V8 are turned off and the autoclave is turned on. Maintain the set reaction time. Turn off heating and stirring. Cool the reactor and relieve excess pressure by opening valves V18 and V19. Turn off valves V16 and V17 and disconnect the autoclave from the gas supply line (Fig. S6).

**Figure S6.** Installation scheme.

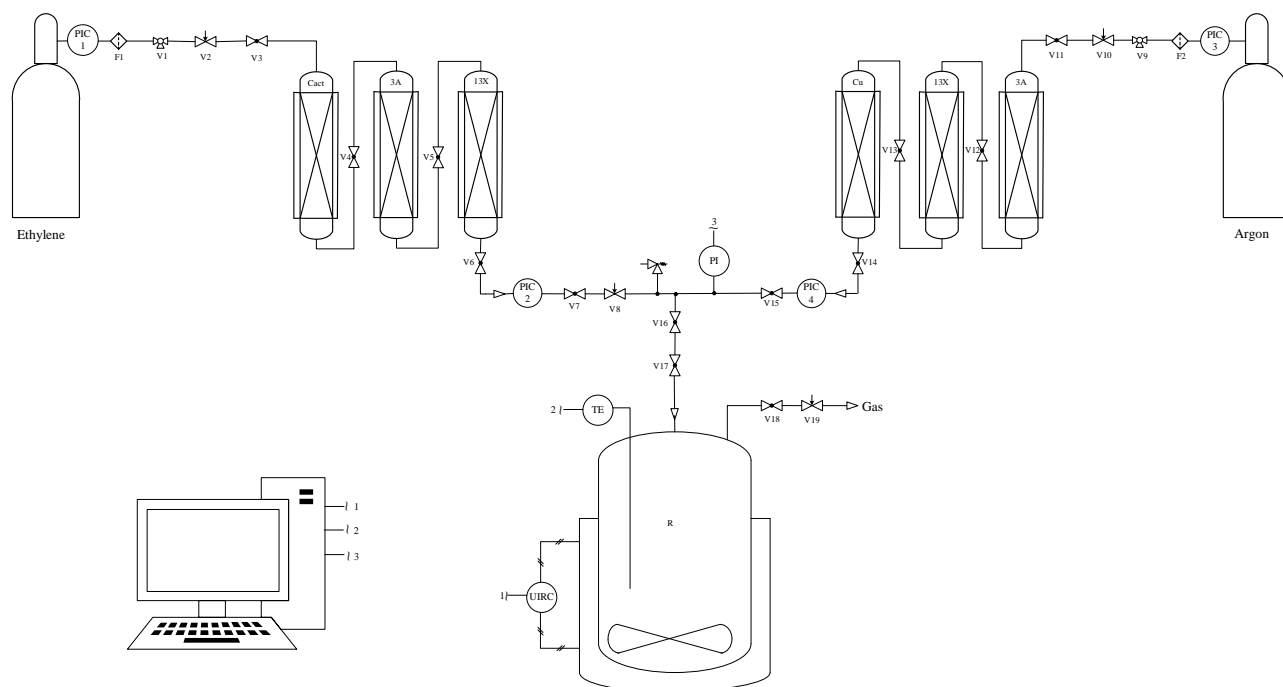

## 2.1. General Procedure for the synthesis of cycloadducts **3**.

**Table S2.** Selection of conditions for the interaction of *bis*-furan (**1f**) with maleic anhydride

| Entry | Solvent          | Temperature, °C | Time | Product   | Yield, %       |
|-------|------------------|-----------------|------|-----------|----------------|
| 1     | acetone          | 24              | 21 d | <b>3f</b> | 21             |
| 2     | benzene          | 80              | 12 h | <b>3f</b> | 45             |
| 3     | toluene          | 110             | 8 h  | <b>3f</b> | polymerization |
| 4     | <i>o</i> -xylene | 140             | 6 h  | <b>3f</b> | polymerization |

Maleic anhydride (1.6 g, 0.016 mol) was added to a solution of the appropriate *bis*-diene **1** (0.013 mol) in PhH (30 mL). The mixture was heated at reflux for 8–12 h (see Table 1). The reaction mixture was cooled and left overnight at room temperature. The precipitated crystals were filtered off and recrystallized from an *i*-PrOH/DMF mixture to give compound **3**.

(*3aSR,6RS,6aSR,7RS,7aSR,10aRS,10bSR,10cRS*)-2-Acetyl-2,3,6*a*,7*a*,10*a*,10*c*-hexahydro-1*H*,6*H*,7*H*-3*a*,6:7,10*b*-diepoxybenzo[*de*]furo[3,4-*h*]isoquinoline-8,10-dione (**3a**).

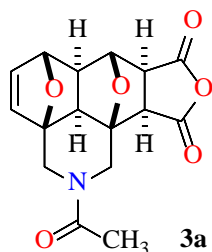

White crystals (2.6 g, 0.007 mol, 51%).  $R_f$  0.42 (EtOH, Sorbfil); mp: 248.4–249.6 °C (from *i*-PrOH/DMF). The mixture of amide rotamers in the ratio of 66/34,  $^1\text{H}$  NMR (600 MHz, DMSO- $d_6$ )  $\delta$  6.45 (1H, dd,  $J = 1.5$  and  $J = 5.5$  Hz, H-5, **maj**), 6.42 (1H, dd,  $J = 1.5$  and  $J = 5.5$  Hz, H-5, **min**), 6.34 (1H, d,  $J = 5.5$  Hz, H-4, **maj**), 6.31 (1H, d,  $J = 5.5$  Hz, H-4, **min**), 4.91 (1H, d,  $J = 1.5$  Hz, H-6, **maj**), 4.88 (1H, br d,  $J = 14.6$  Hz, H-3A, **min**), 4.85 (1H, d,  $J = 1.5$  Hz, H-6, **min**), 4.79 (1H, s, H-7, **min**), 4.77 (1H, br d,  $J = 14.6$  Hz, H-3A, **maj**), 4.72 (1H, s, H-7, **maj**), 4.19 (1H, br d,  $J = 14.6$  Hz, H-3B, **maj**), 3.96 (1H, br d,  $J = 14.6$  Hz, H-3B, **min**), 3.82 (1H, d,  $J = 14.6$  Hz, H-1A, **min**), 3.74 (1H, d,  $J = 14.6$  Hz, H-1A, **maj**), 3.51 (1H, d,  $J = 7.1$  Hz, H-10a, **min**), 3.49 (1H, d,  $J = 7.1$  Hz, H-10a, **maj**), 3.40 (1H, d,  $J = 7.1$  Hz, H-7a, **min**), 3.35 (1H, d,  $J = 7.1$  Hz, H-7a, **maj**), 3.20 (1H, d,  $J = 14.6$  Hz, H-1B, **maj**), 3.16 (1H, d,  $J = 14.6$  Hz, H-1B, **min**), 2.15 (1H, d,  $J = 6.5$  Hz, H-6a, **min**), 2.14 (1H, d,  $J = 6.5$  Hz, H-6a, **maj**), 1.96-1.95 (1H, m, H-10c, **min**), 1.95-1.94 (1H, m, H-10c, **maj**), 1.92 (3H, br. s, Ac, **maj**), 1.89 (3H, br. s, Ac, **min**).  $^{13}\text{C}$  NMR (150 MHz, DMSO- $d_6$ )  $\delta$  173.0, 172.9, 171.1, 171.0, 170.0, 169.7, 139.0, 138.9, 137.8, 137.5, 84.7, 84.6, 83.8, 83.6, 82.1, 81.7, 80.9, 80.5, 53.2, 52.8, 52.9, 48.9 (2C), 47.8, 47.7, 46.5, 45.7, 41.6, 40.6, 22.2, 22.1. IR  $\nu_{\text{max}}/\text{cm}^{-1}$  (tablet KBr): 3078, 3011, 1882, 1798, 1724, 1631, 1228, 1313. HRMS (ESI-TOF): calcd. for  $\text{C}_{16}\text{H}_{15}\text{NO}_6$   $[\text{M} + \text{H}]^+$  317.0899; found 317.0886.

*tert*-Butyl (3*aSR*,6*RS*,6*aSR*,7*RS*,7*aSR*,10*aRS*,10*bSR*,10*cRS*)-8,10-dioxo-6*a*,7*a*,8,10,10*a*,10*c*-hexahydro-1*H*,6*H*,7*H*-3*a*,6:7,10*b*-diepoxybenzo[*de*]furo[3,4-*h*]isoquinoline-2(3*H*)-carboxylate (**3b**).

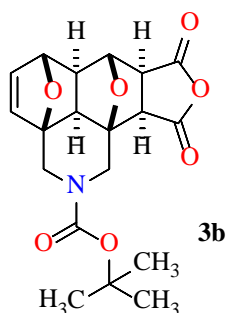

White powder (2.6 g, 0.007 mol, 51%).  $R_f$  0.42 (EtOH, Sorbfil); mp: 248.4–249.6 °C (from *i*-PrOH/DMF). The mixture of amide rotamers in the ratio of 63/37,  $^1\text{H}$  NMR (600 MHz, DMSO- $d_6$ )  $\delta$  6.45 (1H, dd,  $J = 1.7$  and  $J = 5.8$  Hz, H-5, **maj** + **min**), 6.33 (1H, br d,  $J = 5.8$  Hz, H-4, **maj** + **min**), 4.92 (1H, br s, H-6, **maj** + **min**), 4.79 (1H, d,  $J = 1.7$  Hz, H-7, **maj** + **min**), 4.46 (1H, d,  $J = 14.2$  Hz, H-3A, **min**), 4.41-4.36 (2H, m, H-3A and H-1A, **maj**), 4.31 (1H, d,  $J = 15.1$  Hz, H-1A, **min**), 3.51 (1H, d,  $J = 7.2$  Hz, H-10a, **maj** + **min**), 3.50 and 3.40 (2H and 2H, br d and br d, H-1B and H-3B, **maj** + **min**), 3.38 (1H, m, H-7a, **maj** + **min**), 2.16 (1H, d,  $J = 6.3$  Hz, H-10c, **maj** + **min**), 1.92 (1H, d,  $J = 6.3$  Hz, H-6a, **maj** + **min**), 1.36 (9H, br. s, *t*-Bu, **maj** + **min**).  $^{13}\text{C}$  NMR (150.9 MHz, DMSO- $d_6$ )  $\delta$  173.0, 171.0, 154.8, 154.7, 138.9, 138.8, 137.8, 137.7, 84.3, 83.4, 83.3, 81.9, 80.8, 79.6, 79.5, 53.0, 52.9, 49.0, 47.3, 44.2, 43.4, 43.1, 42.3, 28.6. IR  $\nu_{\text{max}}/\text{cm}^{-1}$  (tablet KBr): 1839, 1775, 1689, 1145, 1097. EI-MS (70 eV)  $m/z$  (relative intensity): 377 (1) [ $\text{M}^+$ ], 316 (37), 302 (61), 275 (69), 247 (75), 218 (24), 177 (33), 148 (53), 140 (47), 96 (65), 81 (100), 57 (85), 43 (30). HRMS (ESI-TOF): calcd. for  $\text{C}_{19}\text{H}_{21}\text{NO}_7$  [ $\text{M} + \text{H}$ ] $^+$  375.1318; found 375.1329.

*Methyl (3aSR,6RS,6aSR,7RS,7aSR,10aRS,10bSR,10cRS)-8,10-dioxo-6a,7a,8,10,10a,10c-hexahydro-1H,6H,7H-3a,6:7,10b-diepoxybenzo[de]furo[3,4-h]isoquinoline-2(3H)-carboxylate (3c).*



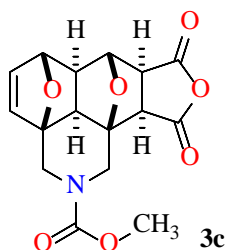

Gray crystals (1.5 g, 0.005 mol, 34%).  $R_f$  0.34 (EtOAc, Sorbfil); mp: 226.1–227.2 °C (with decomp., from *i*-PrOH/DMF). The mixture of amide rotamers in the ratio of 55/45, <sup>1</sup>H NMR (600 MHz, DMSO-*d*<sub>6</sub>)  $\delta$  6.46 (1H, dd,  $J = 1.7$  and  $J = 5.8$  Hz, H-5, **maj** + **min**), 6.33 (1H, br d,  $J = 5.8$  Hz, H-4, **maj** + **min**), 4.91 (1H, br s, H-6, **maj**), 4.90 (1H, br s, H-6, **min**), 4.80 (1H, br s, H-7, **min**), 4.79 (1H, br s, H-7, **maj**), 4.51 (1H, d,  $J = 14.5$  Hz, H-3A, **min**), 4.40 (2H, d,  $J = 14.5$  Hz, H-3A and H-1A, **maj**), 4.28 (1H, d,  $J = 14.5$  Hz, H-1A, **min**), 3.61 (1H, d,  $J = 14.5$  Hz, H-3B, **maj**), 3.56 and 3.55 (3H, br s, CO<sub>2</sub>CH<sub>3</sub>, **maj** + **min**), 3.54 (1H, br dd,  $J = 3.3$  and  $J = 7.4$  Hz, H-10a, **maj** + **min**), 3.49–3.42 (3H, m, H-3B, **min** and H-1B, **maj** + **min**), 3.40 (1H, br d,  $J = 7.4$  Hz, H-7a, **maj** + **min**), 2.17 (1H, dd,  $J = 1.6$  and  $J = 6.6$  Hz, H-10c, **maj** + **min**), 1.95 (1H, d,  $J = 6.6$  Hz, H-6a, **maj** + **min**). <sup>13</sup>C NMR (100 MHz, DMSO-*d*<sub>6</sub>)  $\delta$  172.3, 170.4, 155.6, 155.5, 138.4, 137.0, 83.7, 82.8, 82.7, 82.4, 81.4, 80.2, 52.5, 52.4, 52.3, 48.6, 46.8, 43.5, 43.3, 42.6. IR  $\nu_{\max}/\text{cm}^{-1}$  (tablet KBr): 1861, 1781, 1693, 1261, 1123, 1092. EI-MS (70 eV)  $m/z$  (relative intensity): 333 (14) [M<sup>+</sup>], 305 (13), 265 (15), 234 (14), 176 (23), 167 (47), 154 (89), 122 (44), 91 (38), 80 (100), 53 (72). HRMS (ESI-TOF): calcd. for C<sub>16</sub>H<sub>15</sub>NO<sub>7</sub> [M + H]<sup>+</sup> 333.0849; found 333.0832.

(3*aSR*,6*RS*,6*aSR*,7*RS*,7*aSR*,10*aRS*,10*bSR*,10*cRS*)-2-(Trifluoroacetyl)-2,3,6*a*,7*a*,10*a*,10*c*-hexahydro-1*H*,6*H*,7*H*-3*a*,6:7,10*b*-diepoxybenzo[*de*]furo[3,4-*h*]isoquinoline-8,10-dione (**3d**).

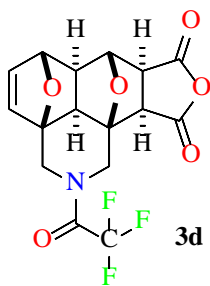

White crystals (2.8 g, 0.0077 mol, 59 %).  $R_f$  0.42 (EtOH, Sorbfil); mp: 230.2–233.5 °C (with decomp., from *i*-PrOH/DMF). The mixture of amide rotamers in the ratio of 56/44,  $^1\text{H}$  NMR (600 MHz, DMSO- $d_6$ )  $\delta$  6.50 (1H, br dd,  $J = 1.5$  and  $J = 5.6$  Hz, H-5, **maj**), 6.49 (1H, br dd,  $J = 1.5$  and  $J = 5.6$  Hz, H-5, **min**), 6.40 (1H, d,  $J = 5.6$  Hz, H-4, **min**), 6.34 (1H, d,  $J = 5.6$  Hz, H-4, **maj**), 4.98 (1H, d,  $J = 1.5$  Hz, H-6, **maj**), 4.95 (1H, d,  $J = 1.5$  Hz, H-6, **min**), 4.87 (1H, s, H-7, **min**), 4.84 (1H, s, H-7, **maj**), 4.80 (1H, d,  $J = 14.1$  Hz, H-3A, **min**), 4.68 (1H, br dd,  $J = 1.0$  and  $J = 14.6$  Hz, H-3A, **maj**), 4.20 (1H, d,  $J = 14.6$  Hz, H-3B, **maj**), 4.14 (1H, br d,  $J = 14.6$  Hz, H-3B, **min**), 4.10 (1H, br d,  $J = 14.6$  Hz, H-1A, **min**), 4.06 (1H, d,  $J = 14.6$  Hz, H-1A, **maj**), 3.70 (1H, d,  $J = 14.6$  Hz, H-1B, **maj**), 3.64 (1H, d,  $J = 14.6$  Hz, H-1B, **min**), 3.58 (1H, br d,  $J = 7.1$  Hz, H-10a, **min**), 3.58 (1H, br d,  $J = 7.1$  Hz, H-10a, **maj**), 3.50 (1H and 1H, br d and br d,  $J = 7.1$  Hz, H-7a, **maj** and H-7a, **min**), 2.24 (1H and 1H, br d and br d,  $J = 6.6$  Hz, H-10c, **maj** and H-10c, **min**), 2.11 (1H and 1H, br d and br d,  $J = 6.6$  Hz, H-6a, **maj** and H-6a, **min**).  $^{13}\text{C}$  NMR (150.91 MHz, DMSO- $d_6$ )  $\delta$  172.8, 172.7, 171.1, 170.9, 156.1 (q,  $^2J_{CF} = 34.7$  Hz, COCF<sub>3</sub>), 155.9 (q,  $^2J_{CF} = 34.7$ , COCF<sub>3</sub>), 139.2, 139.1, 137.2, 137.1, 116.7 (q,  $^1J_{CF} = 287.6$  Hz, COCF<sub>3</sub>), 84.2, 83.9, 83.3, 82.8, 82.0, 81.9, 80.9, 80.8, 53.1, 53.0, 52.99, 52.9, 49.0, 47.5, 47.4, 45.9 (q,  $^4J_{CF} = 4.3$  Hz, C-1), 44.8 (q,  $^4J_{CF} = 4.3$  Hz, C-1), 43.9, 42.8.  $^{19}\text{F}$  NMR (564.7 MHz, DMSO- $d_6$ )  $\delta$  -66.78 (3F, s, CF<sub>3</sub>, **maj**), -66.94 (3F, s, CF<sub>3</sub>, **min**). IR  $\nu_{\text{max}}/\text{cm}^{-1}$  (tablet KBr): 1872, 1753, 1711, 1264, 1131, 1083. HRMS (ESI-TOF): calcd. for C<sub>16</sub>H<sub>12</sub>F<sub>3</sub>NO<sub>6</sub> [M + H]<sup>+</sup> 371.0617; found 371.0629.

(3*aSR*,6*RS*,6*aSR*,7*RS*,7*aSR*,10*aRS*,10*bSR*,10*cRS*)-2-Benzoyl-2,3,6*a*,7*a*,10*a*,10*c*-hexahydro-1*H*,6*H*,7*H*-3*a*,6:7,10*b*-diepoxybenzo[*de*]furo[3,4-*h*]isoquinoline-8,10-dione (**3e**).

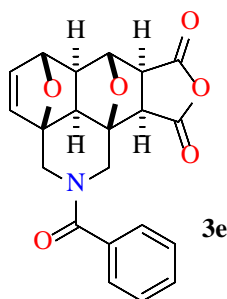

White crystals (3.0 g, 0.008 mol, 60%).  $R_f$  0.45 (EtOAc, Sorbfil); mp: 207.4–209.0 °C (from *i*-PrOH/DMF). The mixture of amide rotamers in the ratio of 61/39,  $^1\text{H}$  NMR (600 MHz, DMSO- $d_6$ )  $\delta$  7.43-7.40 (5H, m, H-2-6-Ph, **maj** + **min**), 6.50-6.49 (1H, m, H-5, **min**), 6.45 (1H, br d,  $J = 5.5$  Hz, H-5, **maj**), 6.43 (1H, br d,  $J = 6.2$  Hz, H-4, **min**), 6.27 (1H, br d,  $J = 5.5$  Hz, H-4, **maj**), 5.03-5.01 (1H, br d,  $J = 14.4$  Hz, H-3A, **min**), 5.00 (1H, br s, H-6, **maj**), 4.98 (1H, br s, H-6, **min**), 4.95-4.93 (1H, br d,  $J = 14.4$  Hz, H-3A, **maj**), 4.89 (1H, br s, H-7, **min**), 4.86 (1H, br s, H-7, **maj**), 4.05 (1H, br d,  $J = 14.4$  Hz, H-3B, **maj**), 4.04 (1H, br d,  $J = 15.1$  Hz, H-3B, **min**), 3.82 (1H, m, H-1A, **min**), 3.80-3.77 (1H, br d,  $J = 14.4$  Hz, H-1A, **maj**), 3.57 (1H, br d,  $J = 6.9$  Hz, H-10a, **maj**), 3.54 (1H, br d,  $J = 6.9$  Hz, H-10a, **min**), 3.50 (1H, m, H-1B, **min**), 3.47 (1H, br d,  $J = 7.6$  Hz, H-7a, **maj**), 3.44 (1H, br d,  $J = 6.9$  Hz, H-7a, **min**), 3.37 (1H, m, H-1B, **maj**), 2.22 (1H, br d,  $J = 6.9$  Hz, H-10c, **maj** + **min**), 2.05 (1H, br d,  $J = 6.2$  Hz, H-6a, **maj** + **min**).  $^{13}\text{C}$  NMR (151.9 MHz, DMSO- $d_6$ )  $\delta$  173.0, 172.9, 171.0, 170.8, 170.5, 170.4, 139.0, 137.8, 137.4, 136.4, 130.0, 129.9, 128.8, 127.8, 127.7, 84.5, 83.6, 83.4, 82.2, 81.9, 81.1, 80.8, 53.1, 53.0, 52.9, 52.8, 49.0, 48.9, 47.8, 47.5, 46.5, 42.1, 41.2. IR  $\nu_{\text{max}}/\text{cm}^{-1}$  (tablet KBr): 1734, 1593, 1571, 1279, 1227, 989. EI-MS (70 eV)  $m/z$  (relative intensity): 380 (14) [ $\text{M}^+ - 1$ ], 379 (100), 200 (51),

106 (38), 105 (64), 80 (46), 43 (26), 33 (53). HRMS (ESI-TOF): calcd. for  $C_{21}H_{17}NO_6$  [ $M + H$ ]<sup>+</sup> 379.1056; found 379.1064.

(3*aSR*,6*RS*,6*aSR*,7*RS*,7*aSR*,10*aRS*,10*bSR*,10*cRS*)-6*a*,7*a*,10*a*,10*c*-Tetrahydro-6*H*,7*H*-3*a*,6:7,10*b*-diepoxybenzo[*de*]furo[3,4-*h*]isochromene-8,10(1*H*,3*H*)-dione (**3f**).

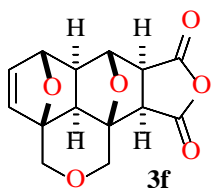

Light-brown crystals (1.71 g, 0.006 mol, 45%).  $R_f$  0.53 (EtOAc, Sorbfil); mp: 248.4–249.2 °C (with decomp., from *i*-PrOH/DMF). <sup>1</sup>H NMR (400.1 MHz, DMSO-*d*<sub>6</sub>)  $\delta$  6.43 (1H, dd,  $J = 1.3$  and  $J = 5.5$  Hz, H-5), 6.31 (1H, d,  $J = 5.5$  Hz, H-4), 4.95 (1H, d,  $J = 1.3$  Hz, H-6), 4.83 (1H, s, H-7), 4.09 (1H, d,  $J = 12.7$  Hz, H-3A), 4.02-3.91 (3H, m, H-1A, H-3B and H-1B), 3.50 (1H, d,  $J = 7.0$  Hz, H-10a), 3.38 (1H, d,  $J = 7.0$  Hz, H-7a), 2.16 (1H, d,  $J = 6.7$  Hz, H-10c), 1.94 (1H, d,  $J = 6.7$  Hz, H-6a). <sup>13</sup>C NMR (100.6 MHz, DMSO-*d*<sub>6</sub>)  $\delta$  172.4, 170.3, 137.9, 136.7, 83.5, 82.6, 81.6, 80.3, 65.1, 64.1, 52.3, 52.0, 48.2, 45.5. IR  $\nu_{max}/cm^{-1}$  (tablet KBr): 1768, 1671, 1253, 1231, 1090, 1063. EI-MS (70 eV)  $m/z$  (relative intensity): 277 (2) [ $M^{++4}$ ], 276 (14), 97 (100), 81 (20), 80 (76), 53 (17). HRMS (ESI-TOF): calcd. for  $C_{14}H_{12}O_6$  [ $M + H$ ]<sup>+</sup> 276.0634; found 276.0621.

(3*aSR*,6*RS*,6*aSR*,7*RS*,7*aSR*,10*aRS*,10*bSR*,10*cRS*)-6*a*,7*a*,10*a*,10*c*-Tetrahydro-6*H*,7*H*-3*a*,6:7,10*b*-diepoxybenzo[4,5]isothiochromeno[7,8-*c*]furan-8,10(1*H*,3*H*)-dione (**3g**).

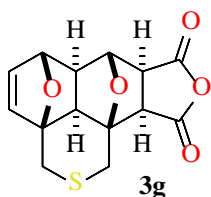

Light-yellow powder (1.2 g, 0.004 mol, 31%).  $R_f$  0.34 (EtOH : EtOAc, 1 : 3, Sorbfil); mp: 245.1–245.7 °C (with decomp., from *i*-PrOH/DMF).  $^1\text{H}$  NMR (400.1 MHz, DMSO- $d_6$ )  $\delta$  6.49 (1H, dd,  $J = 1.5$  and  $J = 5.7$  Hz, H-5), 6.21 (1H, d,  $J = 5.7$  Hz, H-4), 4.95 (1H, d,  $J = 1.5$  Hz, H-6), 4.38 (1H, s, H-7), 3.54 (1H, d,  $J = 7.2$  Hz, H-10a), 3.41 (1H, d,  $J = 14.6$  Hz, H-3A), 3.37 (1H, d,  $J = 14.6$  Hz, H-3B), 3.28 (1H, d,  $J = 7.2$  Hz, H-7a), 2.90 (1H, d,  $J = 14.6$  Hz, H-1A), 2.68 (1H, d,  $J = 14.6$  Hz, H-1B), 2.19 (1H, d,  $J = 6.4$  Hz, H-10c), 1.84 (1H, d,  $J = 6.4$  Hz, H-6a).  $^{13}\text{C}$  NMR (100.6 MHz, DMSO- $d_6$ )  $\delta$  171.5, 169.3, 138.5, 138.1, 82.8, 82.4, 80.8, 79.7, 53.6, 52.7, 49.5, 46.9, 27.2, 26.1. IR  $\nu_{\text{max}}/\text{cm}^{-1}$  (tablet KBr): 2623, 1831, 1766, 1254, 1228, 1093. EI-MS (70 eV)  $m/z$  (relative intensity): 292 (81) [ $\text{M}^+$ ], 250 (32), 194 (26), 193 (100), 113 (85), 82 (40), 81 (65), 77 (31), 53 (24), 43 (35). HRMS (ESI-TOF): calcd. for  $\text{C}_{14}\text{H}_{12}\text{O}_5\text{S}$  [ $\text{M} + \text{H}$ ] $^+$  292.0405; found 292.0411.

**2.1. General Procedure for the synthesis of the adducts 4.** *N*-Methylmaleimide (1.6 g, 0.014 mol) was added to a solution of the appropriate *bis*-diene **1** (0.013 mol) in PhMe (30 mL). The mixture was heated at reflux for 7–16 h (see Table 1). The reaction mixture was cooled and left overnight at room temperature. The precipitated crystals were filtered off and recrystallized from an *i*-PrOH/DMF mixture to give compound **4**.

*tert*-Butyl (3*aSR*,6*RS*,6*aSR*,7*RS*,7*aSR*,10*aRS*,10*bSR*,10*cRS*)-9-methyl-8,10-dioxo-6*a*,7,7*a*,8,9,10,10*a*,10*c*-octahydro-1*H*,6*H*-3*a*,6:7,10*b*-diepoxybenzo[*de*]pyrrolo[3,4-*h*]isoquinoline-2(3*H*)-carboxylate (**4a**).

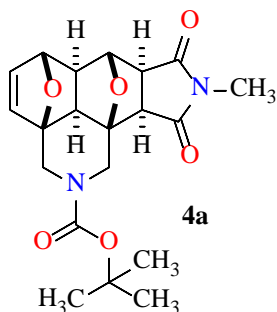

White powder (2.7 g, 0.007 mol, 52%).  $R_f$  0.52 (EtOAc, Sorbfil); mp: 204.9–205.7 °C (with decomp., from *i*-PrOH/DMF). Very broad signals in NMR spectrums.  $^1\text{H}$  NMR (600 MHz,  $\text{CDCl}_3$ )  $\delta$  6.46 (1H, br s, H-5), 6.27 (1H, d,  $J = 5.8$  Hz, H-4), 4.99 (1H, s, H-6), 4.84–4.53 (1H, br m, H-3 and H-1A), 3.43–3.28 (1H, br m, H-1B), 2.94 (1H, d,  $J = 6.6$  Hz, H-10a), 2.95 (3H, s, N- $\text{CH}_3$ ), 2.79 (1H, d,  $J = 6.6$  Hz, H-7a), 2.11 (1H, d,  $J = 6.6$  Hz, H-10c), 1.76 (1H, d,  $J = 6.6$  Hz, H-6a), 1.44 (9H, s, O- $\text{C}(\text{CH}_3)_3$ ).  $^{13}\text{C}$  NMR (100.6 MHz,  $\text{CDCl}_3$ )  $\delta$  176.4, 174.3, 155.4, 138.5, 137.2, 84.3, 82.2, 81.1, 80.7, 80.3, 51.6, 51.5, 49.9, 48.8, 44.5, 42.9, 28.4 (3C), 25.1. IR  $\nu_{\text{max}}/\text{cm}^{-1}$  (tablet KBr): 1694, 1288, 1266. EI-MS (70 eV)  $m/z$  (relative intensity): 388 (2) [ $\text{M}^+$ ], 332 (29), 315 (22), 288 (32), 259 (32), 177 (73), 140 (29), 109 (34), 96 (41), 80 (76), 57 (100), 43 (42). HRMS (ESI-TOF): calcd. for  $\text{C}_{20}\text{H}_{24}\text{N}_2\text{O}_6$  [ $\text{M}+\text{H}$ ] $^+$  388.1634; found 388.1646.

*Methyl (3aSR,6RS,6aSR,7RS,7aSR,10aRS,10bSR,10cRS)-9-methyl-8,10-dioxo-6a,7,7a,8,9,10,10a,10c-octahydro-1H,6H-3a,6:7,10b-diepoxybenzo[de]pyrrolo[3,4-h]isoquinoline-2(3H)-carboxylate (4b).*

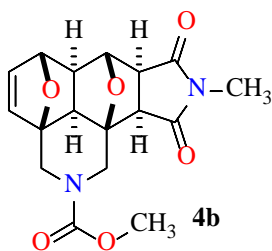

White powder (3.6 g, 0.004 mol, 79%).  $R_f$  0.50 (EtOAc, Sorbfil); mp: 232.0–233.0 °C (from *i*-PrOH/DMF). The mixture of amide rotamers in the ratio of 50/50,  $^1\text{H}$  NMR (600 MHz,  $\text{DMSO}-d_6$ )  $\delta$  6.47 (1H, m, H-5, **A**), 6.42 (1H, m, H-5, **B**), 6.28 (1H, d,  $J = 5.8$  Hz, H-4, **A**), 6.22 (1H, d,  $J = 5.8$  Hz, H-4, **B**), 5.00 (2H, d,  $J = 1.7$  Hz,  $2 \times$  H-6, **A + B**), 4.84 (2H, br s,  $2 \times$  H-7, **A + B**), 4.82 (1H, m, H-1A, **A**), 4.76–4.72 (1H, m, H-3A, **A**), 4.65 (2H, m, H-1A and H-3A, **B**), 3.74–3.72 (1H, m, H-7a, **A**), 3.71 (6H, br s,  $2 \times$   $\text{CO}_2\text{Me}$ , **A + B**),

3.53 (1H, d,  $J = 14.9$  Hz, H-1B, **B**), 3.45 (2H,  $J = 14.9$  Hz, H-1B and H-3B, **A**), 3.35 (1H, d,  $J = 14.9$  Hz, H-3B, **B**), 3.20-3.13 (1H, m, H-7a, **B**), 2.98 (1H, m, H-10a, **B**), 2.97 (3H, m, CH<sub>3</sub>, **A**), 2.94 (3H, s, CH<sub>3</sub>, **B**), 2.81 (1H, d,  $J = 6.6$  Hz, H-10a, **A**), 2.11 (1H, br d,  $J = 5.0$  Hz, H-10c, **A**), 1.98 (1H, br d,  $J = 5.0$  Hz, H-10c, **B**), 1.79 (1H, d,  $J = 6.6$  Hz, H-6a, **A**), 1.62 (1H, d,  $J = 6.6$  Hz, H-6a, **B**). <sup>13</sup>C NMR (151.9 MHz, DMSO-*d*<sub>6</sub>)  $\delta$  176.4, 175.0, 174.4, 156.7, 156.6, 138.8, 138.6, 137.0, 136.9, 84.3, 84.2, 82.3, 82.1, 81.6, 81.2, 80.8, 79.6, 53.3, 53.2, 52.7, 51.7, 51.4, 50.1, 48.9, 46.2, 44.9, 44.3, 44.2, 44.0, 43.7, 25.3, 24.9. IR  $\nu_{\text{max}}/\text{cm}^{-1}$  (tablet KBr): 1769, 1708, 1468, 1273. EI-MS (70 eV)  $m/z$  (relative intensity): 346 (50) [M<sup>+</sup>], 318 (46), 239 (13), 176 (35), 167 (56), 154 (100), 82 (54), 81 (81), 53 (46), 45 (48). HRMS (ESI-TOF): calcd. for C<sub>17</sub>H<sub>18</sub>N<sub>2</sub>O<sub>6</sub> [M+H]<sup>+</sup> 346.1165; found 346.1152.

(3*aSR*,6*RS*,6*aSR*,7*RS*,7*aSR*,10*aRS*,10*bSR*,10*cRS*)-9-Methyl-2-(trifluoroacetyl)-2,3,6*a*,7*a*,10*a*,10*c*-hexahydro-1*H*,6*H*-3*a*,6:7,10*b*-diepoxybenzo[*de*]pyrrolo[3,4-*h*]isoquinoline-8,10(7*H*,9*H*)-dione (**4c**).

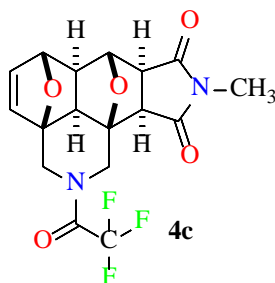

White powder (3.1 g, 0.008 mol, 60%).  $R_f$  0.42 (EtOAc, Sorbfil); mp: 212.6–213.9 °C (from *i*-PrOH/DMF). The mixture of amide rotamers in the ratio of 50/50, <sup>1</sup>H NMR (600 MHz, CDCl<sub>3</sub>)  $\delta$  6.52 (1H, dd,  $J = 1.7$  and  $J = 5.8$  Hz, H-5, **A**), 6.49 (1H, dd,  $J = 1.7$  and  $J = 5.8$  Hz, H-5, **B**), 6.32 (1H, d,  $J = 5.8$  Hz, H-4, **A**), 6.30 (1H, d,  $J = 5.8$  Hz, H-4, **B**), 5.22 (1H, dd,  $J = 1.2$  and  $J = 14.8$  Hz, H-1A, **B**), 5.19 (1H, dd,  $J = 1.2$  and  $J = 14.8$  Hz, H-1A, **A**), 5.04 (1H, d,  $J = 1.7$  Hz, H-6, **A**), 5.03 (1H, d,  $J = 1.7$  Hz, H-6, **B**), 4.86 (1H, s, H-7, **A**), 4.85 (1H, s, H-7, **B**), 4.56 (1H, br d,  $J = 14.6$  Hz, H-3A **A**), 4.50 (1H, br d,  $J = 14.6$  Hz, H-

3A **B**), 3.83 (1H, d,  $J = 14.8$  Hz, H-1B, **B**), 3.79 (1H, d,  $J = 14.8$  Hz, H-1B, **A**), 3.46 (1H, d,  $J = 14.8$  Hz, H-3B, **A**), 3.36 (1H, d,  $J = 14.8$  Hz, H-3B, **B**), 3.00 (2H, d,  $J = 6.6$  Hz, H-7a, **A + B**), 2.98 (6H, s,  $2 \times \text{N-CH}_3$ ), 2.87 (1H, d,  $J = 6.6$  Hz, H-10a, **A + B**), 2.17 (1H, d,  $J = 6.2$  Hz, H-6a, **B**), 2.15 (1H, d,  $J = 6.2$  Hz, H-6a, **A**), 1.90 (1H, d,  $J = 6.2$  Hz, H-10c, **B**), 1.89 (1H, d,  $J = 6.2$  Hz, H-10c, **A**).  $^{13}\text{C}$  NMR (151.9 MHz,  $\text{DMSO-}d_6$ )  $\delta$  176.0, 175.9, 174.3, 174.0, 157.2 and 156.9 (q,  $^2J_{\text{CF}} = 36.1$  Hz,  $\text{COCF}_3$ ), 139.3, 138.8, 136.5, 136.1, 116.3 and 116.2 (q,  $^1J_{\text{CF}} = 298.0$  Hz,  $\text{COCF}_3$ ), 83.9, 83.7, 81.9, 81.6, 81.3, 81.2, 80.9, 80.8, 51.6, 51.5, 51.4, 51.2, 50.0, 49.9, 49.0, 49.1, 45.8 and 45.2 (q,  $^4J_{\text{CF}} = 4.4$  Hz, C-1), 43.8, 43.2, 25.3, 25.2.  $^{19}\text{F}$  NMR (564.7 MHz,  $\text{DMSO-}d_6$ )  $\delta$  -65.52 (3F, s,  $\text{CF}_3$ , **A**), -67.70 (3F, s,  $\text{CF}_3$ , **B**). IR  $\nu_{\text{max}}/\text{cm}^{-1}$  (tablet KBr): 2999, 2978, 1774, 1703, 1185, 1139. HRMS (ESI-TOF): calcd. for  $\text{C}_{17}\text{H}_{15}\text{F}_3\text{N}_2\text{O}_5$   $[\text{M}+\text{H}]^+$  384.0933; found 384.0945.

(3a*SR*,6*RS*,6a*SR*,7*RS*,7a*SR*,10a*RS*,10b*SR*,10c*RS*)-2-Benzoyl-9-methyl-2,3,6a,7a,10a,10c-hexahydro-1*H*,6*H*-3a,6:7,10*b*-diepoxybenzo[*de*]pyrrolo[3,4-*h*]isoquinoline-8,10(7*H*,9*H*)-dione (**4d**).

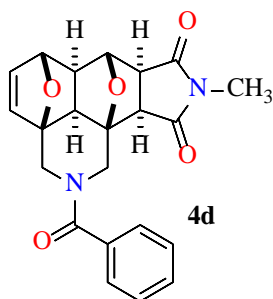

Light-yellow powder (3.4 g, 0.009 mol, 66%).  $R_f$  0.32 (EtOAc, Sorbfil); mp: 243.4–244.4 °C (from *i*-PrOH/DMF). The mixture of amide rotamers in the ratio of 67/33,  $^1\text{H}$  NMR (600 MHz,  $\text{DMSO-}d_6$ )  $\delta$  7.44-7.38 (4H, m, H-2,3,5,6-Ph, **maj + min**), 6.48-6.36 (2H, m, H-4-Ph and H-5, **maj + min**), 6.26 (1H, br d,  $J = 5.8$  Hz, H-4, **maj**), 6.20 (1H, br d,  $J = 5.8$  Hz, H-4, **min**), 5.08-4.84 (2H, m, H-6 and H-3A, **maj + min**), 4.71 (1H, s, H-7, **min**), 4.66 (1H, s, H-7, **maj**), 4.10 (1H, br d,  $J = 14.1$  Hz, H-3B, **min**), 4.02 (1H, br d,  $J = 14.1$  Hz, H-



3B, **maj**), 3.47 (1H, br d,  $J = 14.1$  Hz, H-1A, **maj + min**), 3.18 (1H, br d,  $J = 6.6$  Hz, H-10a, **maj + min**), 3.08 (1H, d,  $J = 6.6$  Hz, H-7a, **maj**), 2.99 (1H, d,  $J = 6.6$  Hz, H-7a, **min**), 2.89 (3H, s, N-CH<sub>3</sub>, **min**), 2.84 (3H, s, N-CH<sub>3</sub>, **maj**), 2.79 (1H, br d,  $J = 14.1$  Hz, H-1B, **maj + min**), 2.16 (1H, br d,  $J = 6.6$  Hz, H-10c, **min**), 2.00 (1H, br d,  $J = 6.6$  Hz, H-6a, **maj**), 1.82 (1H, br d,  $J = 6.6$  Hz, H-10c, **min**), 1.61 (1H, br d,  $J = 6.6$  Hz, H-6a, **min**). <sup>13</sup>C NMR (100.6 MHz, DMSO-*d*<sub>6</sub>):  $\delta$  176.9, 175.1, 174.7, 169.9, 138.3, 138.1, 137.2, 136.8, 135.9, 129.3, 128.1 (2C), 127.2 (2C), 83.8, 82.3, 81.9, 80.5, 80.0, 78.7, 78.5, 51.2, 50.6, 48.7, 47.8, 46.9, 45.6, 44.1, 40.0, 24.5, 24.3. EI-MS (70 eV)  $m/z$  (relative intensity): 392 (32) [M<sup>+</sup>], 287 (27), 200 (40), 176 (19), 105 (100), 81 (42), 45 (26). IR  $\nu_{\text{max}}/\text{cm}^{-1}$  (tablet KBr): 2981, 2911, 1769, 1708, 1628, 1433, 1275. HRMS (ESI-TOF): calcd. for C<sub>22</sub>H<sub>20</sub>N<sub>2</sub>O<sub>5</sub> [M+H]<sup>+</sup> 392.1372; found 392.1359.

(3*aSR*,6*RS*,6*aSR*,7*RS*,7*aSR*,10*aRS*,10*bSR*,10*cRS*)-9-Methyl-6*a*,7*a*,10*a*,10*c*-tetrahydro-6*H*-3*a*,6:7,10*b*-diepoxyisochromeno[4,5-*ef*]isoindole-8,10(1*H*,3*H*,7*H*,9*H*)-dione (**4e**).

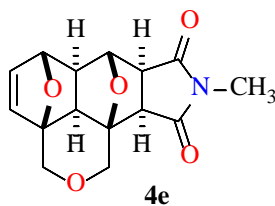

White crystals (2.3 g, 0.008 mol, 60%).  $R_f$  0.34 (EtOAc, Sorbfil); mp: 240.0–241.5 °C (from *i*-PrOH/DMF). <sup>1</sup>H NMR (600.1 MHz, CDCl<sub>3</sub>)  $\delta$  6.46 (1H, dd,  $J = 1.7$  and  $J = 5.8$  Hz, H-5), 6.24 (1H, d,  $J = 5.8$  Hz, H-4), 5.05 (1H, d,  $J = 1.7$  Hz, H-6), 4.86 (1H, s, H-7), 4.40 (1H, d,  $J = 13.2$  Hz, H-1A), 4.32 (1H, d,  $J = 13.2$  Hz, H-3A), 4.06 (1H, d,  $J = 13.2$  Hz, H-1B), 3.99 (1H, d,  $J = 13.2$  Hz, H-3B), 2.97 (1H, d,  $J = 7.0$  Hz, H-7a), 2.96 (3H, s, N-Me), 2.81 (1H, d,  $J = 7.0$  Hz, H-10a), 2.11 (1H, d,  $J = 6.3$  Hz, H-10c), 1.81 (1H, d,  $J = 6.3$  Hz, H-6a). <sup>13</sup>C NMR (150.9 MHz, CDCl<sub>3</sub>)  $\delta$  176.6, 174.6, 138.4, 136.5, 84.1, 82.1, 81.4, 81.2, 66.2, 65.6, 51.6, 51.1, 49.6, 47.4, 25.2. IR  $\nu_{\text{max}}/\text{cm}^{-1}$  (tablet KBr): 1765, 1690, 1438, 1386, 1287. EI-MS (70 eV)  $m/z$  (relative intensity): 289 (14) [M<sup>+</sup>], 208 (46), 112

(42), 98 (37), 97 (99), 91 (39), 82 (74), 81 (100), 53 (37), 45 (45). HRMS (ESI-TOF): calcd. for C<sub>15</sub>H<sub>15</sub>NO<sub>5</sub> [M + H]<sup>+</sup> 289.0950; found 289.0963.

(3*aSR*,6*RS*,6*aSR*,7*RS*,7*aSR*,10*aRS*,10*bSR*,10*cRS*)-9-Methyl-6*a*,7*a*,10*a*,10*c*-tetrahydro-6*H*-3*a*,6:7,10*b*-diepoxyisothiochromeno[4,5-*ef*]isoindole-8,10(1*H*,3*H*,7*H*,9*H*)-dione (**4f**).

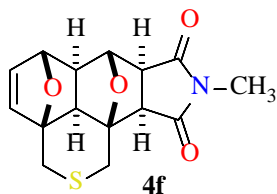

White crystals (2.9 g, 0.0097 mol, 72%). *R<sub>f</sub>* 0.45 (EtOAc, Sorbfil); mp: 229.5–230.1 °C (from *i*-PrOH/DMF). <sup>1</sup>H NMR (600.1 MHz, CDCl<sub>3</sub>) δ 6.50 (1H, dd, *J* = 1.7 and *J* = 5.8 Hz, H-5), 6.19 (1H, d, *J* = 5.8 Hz, H-4), 5.04 (1H, d, *J* = 1.7 Hz, H-6), 4.89 (1H, s, H-7), 3.36 (1H, d, *J* = 14.9 Hz, H-1A), 3.33 (1H, d, *J* = 14.9 Hz, H-1A), 3.06 (1H, dd, *J* = 1.7 and *J* = 14.9 Hz, H-7a), 3.00-2.97 (2H, m, H-1B and H-3B), 2.96 (3H, s, N-Me), 2.75 (1H, d, *J* = 6.6 Hz, H-10a), 2.14 (1H, d, *J* = 6.6 Hz, H-10c), 1.71 (1H, d, *J* = 6.6 Hz, H-6a). <sup>13</sup>C NMR (150.9 MHz, CDCl<sub>3</sub>) δ 176.3, 174.5, 138.9, 138.8, 83.7, 82.1, 80.9, 80.6, 53.1, 52.2, 51.2, 49.0, 28.8, 27.8, 25.1. IR *v*<sub>max</sub>/cm<sup>-1</sup> (tablet KBr): 2996, 1766, 1694, 1133, 979. EI-MS (70 eV) *m/z* (relative intensity): 305 (19) [M<sup>+</sup>], 263 (11), 194 (70), 113 (100), 82 (82), 81 (87), 65 (36), 53 (60), 46 (38). HRMS (ESI-TOF): calcd. for C<sub>15</sub>H<sub>15</sub>NO<sub>4</sub>S [M + H]<sup>+</sup> 305.0722; found 305.0710.

(3*aSR*,6*RS*,6*aSR*,7*RS*,7*aSR*,10*aRS*,10*bSR*,10*cRS*)-9-Methyl-6*a*,7*a*,10*a*,10*c*-tetrahydro-6*H*-3*a*,6:7,10*b*-diepoxyisothiochromeno[4,5-*ef*]isoindole-8,10(1*H*,3*H*,7*H*,9*H*)-dione 2,2-dioxide (**4g**).

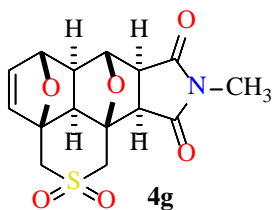

White crystals (3.1 g, 0.0091 mol, 70 %).  $R_f$  0.38 (EtOAc, Sorbfil); mp: 287.8–288.5 °C (from *i*-PrOH/DMF).  $^1\text{H}$  NMR (600.1 MHz,  $\text{CDCl}_3$ )  $\delta$  6.52 (1H, dd,  $J = 1.5$  and  $J = 5.5$  Hz, H-5), 6.27 (1H, d,  $J = 5.5$  Hz, H-4), 5.01 (1H, d,  $J = 1.5$  Hz, H-6), 4.73 (1H, s, H-7), 4.09 (1H, d,  $J = 15.1$  Hz, H-1A), 4.04 (1H, d,  $J = 15.1$  Hz, H-1A), 3.72 (1H, dd,  $J = 3.0$  and  $J = 15.1$  Hz, H-1B), 3.24 (H, dd,  $J = 3.0$  and  $J = 15.1$  Hz, H-3B), 3.19 (1H, d,  $J = 7.1$  Hz, H-10a), 3.05 (1H, d,  $J = 6.6$  Hz, H-7a), 2.80 (3H, s, N-Me), 2.26 (1H, d,  $J = 6.6$  Hz, H-6a).  $^{13}\text{C}$  NMR (150.9 MHz,  $\text{CDCl}_3$ )  $\delta$  177.2, 175.1, 138.9, 138.7, 85.4, 83.8, 81.3, 80.9, 53.6, 51.8, 51.7, 51.3, 50.6, 47.7, 25.2. IR  $\nu_{\text{max}}/\text{cm}^{-1}$  (tablet KBr): 2995, 2940, 1772, 1700, 1437, 1125. HRMS (ESI-TOF): calcd. for  $\text{C}_{15}\text{H}_{15}\text{NO}_6\text{S}$   $[\text{M} + \text{H}]^+$  337.0620; found 337.0635.

**2.3. General Procedure for the synthesis of the adducts 5.** *N*-Ethylmaleimide (1.8 g, 0.014 mol) was added to a solution of the appropriate *bis*-diene **1** (0.013 mol) in PhMe (30 mL). The mixture was heated at reflux for 7–16 h (see Table 1). The reaction mixture was cooled and left overnight at room temperature. The precipitated crystals were filtered off and recrystallized from an *i*-PrOH/DMF mixture to give compounds **5**.

(3*aSR*,6*RS*,6*aSR*,7*RS*,7*aSR*,10*aRS*,10*bSR*,10*cRS*)-2-Acetyl-9-ethyl-2,3,6*a*,7*a*,10*a*,10*c*-hexahydro-1*H*,6*H*-3*a*,6:7,10*b*-diepoxybenzo[*de*]pyrrolo[3,4-*h*]isoquinoline-8,10(7*H*,9*H*)-dione (**5a**).

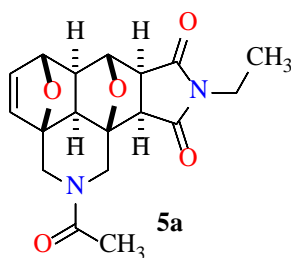

White crystals (2.9 g, 0.0077 mol, 59 %).  $R_f$  0.29 (EtOAc, Sorbfil); mp: 215.3–225.0 °C (from *i*-PrOH/DMF). The mixture of amide rotamers in the ratio of 60/40,  $^1\text{H}$  NMR (600 MHz, DMSO- $d_6$ )  $\delta$  6.47 (1H, dd,  $J = 1.5$  and  $J = 5.6$  Hz, H-5, **maj**), 6.44 (1H, dd,  $J = 1.5$  and  $J = 5.6$  Hz, H-5, **min**), 6.36 (1H, d,  $J = 5.6$  Hz, H-4, **maj**), 6.33 (1H, d,  $J = 5.6$  Hz, H-4, **min**), 4.92 (1H, d,  $J = 1.5$  Hz, H-6, **maj**), 4.90 (1H, d,  $J = 14.2$  Hz, H-3A, **min**), 4.86 (1H, d,  $J = 1.5$  Hz, H-6, **min**), 4.81 (1H, d,  $J = 14.6$  Hz, H-3A, **maj**), 4.64 (1H, s, H-7, **min**), 4.57 (1H, s, H-7, **maj**), 4.20 (1H, d,  $J = 15.1$  Hz, H-3B, **maj**), 3.98 (1H, d,  $J = 15.6$  Hz, H-3B, **min**), 3.81 (1H, d,  $J = 15.4$  Hz, H-1A, **min**), 3.78 (1H, d,  $J = 14.6$  Hz, H-1A, **maj**), 3.40–3.36 (2H, m, N- $\text{CH}_2$ - $\text{CH}_3$ , **maj** + **min**), 3.23–3.21 (1H, d,  $J = 14.1$  Hz, H-1B, **min**), 3.20–3.17 (1H, d,  $J = 14.6$  Hz, H-1B, **maj**), 3.15 (1H, d,  $J = 6.6$  Hz, H-7a, **min**), 3.12 (1H, d,  $J = 6.6$  Hz, H-7a, **maj**), 3.02 (1H, d,  $J = 6.6$  Hz, H-10a, **min**), 2.97 (1H, d,  $J = 6.6$  Hz, H-10a, **maj**), 2.11 (1H, d,  $J = 6.6$  Hz, H-6a, **maj** + **min**), 1.94 (3H, s, Ac, **maj**), 1.92 (1H, d,  $J = 6.6$  Hz, H-10c, **maj** + **min**), 1.88 (3H, s, Ac, **min**), 1.00 (3H, br t,  $J = 7.1$  Hz, N- $\text{CH}_2$ - $\text{CH}_3$ , **maj** + **min**).  $^{13}\text{C}$  NMR (150.9 MHz, DMSO- $d_6$ )  $\delta$  177.3, 177.2, 175.6, 175.4, 169.8, 169.6, 139.0, 138.9, 137.8, 137.5, 84.7, 84.6, 82.7, 82.6, 81.1, 80.9, 80.6, 80.5, 51.7, 51.6, 51.1, 51.4, 49.3, 49.1, 48.5, 48.4, 46.5, 46.1, 41.7, 41.0, 33.6, 33.5, 22.3, 22.0, 13.3, 13.2. IR  $\nu_{\text{max}}/\text{cm}^{-1}$  (tablet KBr): 2999, 2929, 1766, 1691, 1439, 1404, 1223, 1139. HRMS (ESI-TOF): calcd. for  $\text{C}_{18}\text{H}_{20}\text{N}_2\text{O}_5$   $[\text{M}+\text{H}]^+$  344.1372; found 344.1372.

(3*a*SR,6*RS*,6*a*SR,7*RS*,7*a*SR,10*a*RS,10*b*SR,10*c*RS)-9-Ethyl-2-(trifluoroacetyl)-2,3,6*a*,7*a*,10*a*,10*c*-hexahydro-1*H*,6*H*-3*a*,6:7,10*b*-diepoxybenzo[*de*]pyrrolo[3,4-*h*]isoquinoline-8,10(7*H*,9*H*)-dione (**5b**).

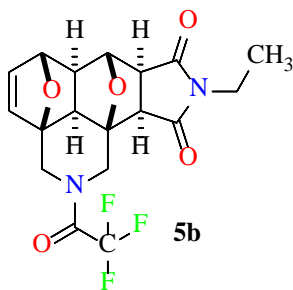

Light yellow powder (3.15 g, 0.0079 mol, 61 %).  $R_f$  0.46 (EtOAc, Sorbfil); mp: 164.8–166.2 °C (with decomp., from *i*-PrOH/DMF). The mixture of amide rotamers in the ratio of 53/47,  $^1\text{H}$  NMR (600 MHz, DMSO- $d_6$ )  $\delta$  6.50–6.47 (1H, m, H-5, **maj** + **min**), 6.40 (1H, d,  $J = 5.6$  Hz, H-4, **maj**), 6.38 (1H, d,  $J = 5.6$  Hz, H-4, **min**), 4.95 (1H, d,  $J = 1.5$  Hz, H-6, **min**), 4.93 (1H, d,  $J = 1.5$  Hz, H-6, **maj**), 4.78 (1H, dd,  $J = 1.5$  and  $J = 14.1$  Hz, H-3A, **maj**), 4.68–4.66 (1H, dd,  $J = 1.5$  and  $J = 14.1$  Hz, H-3A, **min**), 4.67 (1H, s, H-7, **maj**), 4.65 (1H, s, H-7, **min**), 4.21 (1H, d,  $J = 15.1$  Hz, H-3B, **min**), 4.14 (1H, d,  $J = 15.1$  Hz, H-3B, **maj**), 4.07 (1H, d,  $J = 15.1$  Hz, H-1A, **maj** + **min**), 3.65 (1H, d,  $J = 14.1$  Hz, H-1B, **maj** + **min**), 3.40–3.55 (2H, m, N-CH<sub>2</sub>-CH<sub>3</sub>, **maj** + **min**), 3.17–3.16 (1H, d,  $J = 6.6$  Hz, H-7a, **min**), 3.16–3.15 (1H, d,  $J = 6.6$  Hz, H-7a, **maj**), 3.07 (1H, t,  $J = 6.6$  Hz, H-10a, **maj** + **min**), 2.17 (1H, d,  $J = 6.6$  Hz, H-6a, **min**), 2.16 (1H, d,  $J = 6.6$  Hz, H-6a, **maj**), 2.05–2.04 (1H, d,  $J = 6.6$  Hz, H-10c, **maj**), 2.04–2.03 (1H, d,  $J = 6.6$  Hz, H-10c, **min**), 1.01 (3H, t,  $J = 7.1$  Hz, N-CH<sub>2</sub>-CH<sub>3</sub>, **min**), 0.97 (3H, t,  $J = 7.1$  Hz, N-CH<sub>2</sub>-CH<sub>3</sub>, **maj**).  $^{13}\text{C}$  NMR (150.9 MHz, DMSO- $d_6$ )  $\delta$  177.1, 175.5, 175.3, 160.0 (q,  $^2J_{\text{C,F}} = 34.7$  Hz, COCF<sub>3</sub>), 159.9 (q,  $^2J_{\text{C,F}} = 34.7$  Hz, COCF<sub>3</sub>), 139.2, 139.0, 137.3, 137.1, 116.8 (q,  $^1J_{\text{C,F}} = 287.6$  Hz, COCF<sub>3</sub>), 84.2, 83.9, 82.2, 81.9, 81.1, 81.0, 80.9, 80.8, 51.6, 51.5, 51.1, 49.4, 49.2, 48.3, 48.1, 45.8 (q,  $^4J_{\text{C,F}} = 2.9$  Hz, C-1), 45.1 (q,  $^4J_{\text{C,F}} = 2.9$  Hz, C-3), 43.9, 43.2, 33.6, 33.5, 13.3, 13.0.  $^{19}\text{F}$  NMR (564.7 MHz, DMSO- $d_6$ )  $\delta$  –66.79 (3F, s, CF<sub>3</sub>, **min**), –69.98 (3F, s, CF<sub>3</sub>, **maj**). IR  $\nu_{\text{max}}/\text{cm}^{-1}$  (tablet KBr): 2986, 2917, 1776, 1712, 1452, 1400, 1215, 1150. HRMS (ESI-TOF): calcd. for C<sub>18</sub>H<sub>17</sub>F<sub>3</sub>N<sub>2</sub>O<sub>5</sub> [M+H]<sup>+</sup> 398.1090; found 398.1086.

(3*aSR*,5*RS*,5*aSR*,6*RS*,6*aSR*,9*aRS*,9*bSR*,9*cRS*)-3*a*,5-Diethenyl-8-ethylhexahydro-3*H*-6,9*b*-epoxy-2,4-dioxo-8-azacyclopenta[*e*]acenaphthylene-7,9(1*H*,5*H*,8*H*)-dione (**5c**).

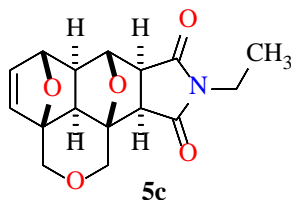

White powder (2.36 g, 0.0078 mol, 60 %).  $R_f$  0.36 (EtOAc, Sorbfil); mp: 218.5–219.7 °C (from *i*-PrOH/DMF). <sup>1</sup>H NMR (600 MHz, DMSO-*d*<sub>6</sub>)  $\delta$  6.43 (1H, dd,  $J = 1.5$  and  $J = 5.5$  Hz, H-5), 6.30 (1H, d,  $J = 5.5$  Hz, H-4), 4.93 (1H, d,  $J = 1.5$  Hz, H-6), 4.63 (1H, s, H-7), 4.10 (1H, d,  $J = 12.6$  Hz, H-3A), 3.98 (1H, d,  $J = 12.6$  Hz, H-3B), 3.94 (1H, d,  $J = 12.6$  Hz, H-1A), 3.91 (1H, d,  $J = 12.6$  Hz, H-1B), 3.35 (2H, dq,  $J = 1.0$  and  $J = 7.1$  Hz, N-CH<sub>2</sub>-CH<sub>3</sub>), 3.11 (1H, d,  $J = 7.1$  Hz, H-7a), 2.98 (1H, d,  $J = 7.1$  Hz, H-10a), 2.10 (1H, d,  $J = 6.3$  Hz, H-6a), 1.88 (1H, d,  $J = 6.3$  Hz, H-10c), 0.99 (3H, t,  $J = 7.1$  Hz, N-CH<sub>2</sub>-CH<sub>3</sub>). <sup>13</sup>C NMR (150.9 MHz, DMSO-*d*<sub>6</sub>)  $\delta$  177.4, 175.4, 138.5, 137.4, 84.1, 82.1, 80.9, 79.4, 65.7, 65.2, 51.4, 51.1, 49.1, 46.8, 33.5, 13.2. IR  $\nu_{\max}/\text{cm}^{-1}$  (tablet KBr): 2977, 2844, 1769, 1703, 1406, 1259, 1130. HRMS (ESI-TOF): calcd. for C<sub>16</sub>H<sub>17</sub>NO<sub>5</sub> [M+H]<sup>+</sup> 303.1107; found 303.1100.

(3*aSR*,5*RS*,5*aSR*,6*RS*,6*aSR*,9*aRS*,9*bSR*,9*cRS*)-3*a*,5-Diethenyl-8-ethylhexahydro-3*H*-6,9*b*-epoxy-4-oxa-2-thia-8-azacyclopenta[*e*]acenaphthylene-7,9(1*H*,5*H*,8*H*)-dione (**5d**).

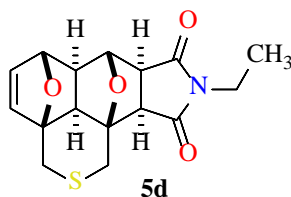

White powder (2.3 g, 0.0072 mol, 55%).  $R_f$  0.41 (EtOAc, Sorbfil); mp: 238.2–240.1 °C (from *i*-PrOH/DMF). <sup>1</sup>H NMR (600 MHz, DMSO-*d*<sub>6</sub>)  $\delta$  6.48 (1H, dd,  $J = 1.5$  and  $J = 5.6$

Hz, H-5), 6.22 (1H, d,  $J = 5.6$  Hz, H-4), 4.92 (1H, d,  $J = 2.0$  Hz, H-6), 4.64 (1H, s, H-7), 3.36 (2H, dq,  $J = 1.0$  and  $J = 7.1$  Hz, N-CH<sub>2</sub>-CH<sub>3</sub>), 3.35-3.32 (2H, m, H-3A and H-3B), 3.14 (1H, d,  $J = 7.1$  Hz, H-7a), 2.88 (1H, d,  $J = 7.1$  Hz, H-10a), 2.86 (1H, dd,  $J = 1.5$  and  $J = 14.1$  Hz, H-1A), 2.62 (1H, dd,  $J = 1.5$  and  $J = 15.1$  Hz, H-1B), 2.11 (1H, d,  $J = 6.5$  Hz, H-6a), 1.78 (1H, d,  $J = 6.5$  Hz, H-10c), 0.99 (3H, t,  $J = 7.1$  Hz, N-CH<sub>2</sub>-CH<sub>3</sub>). <sup>13</sup>C NMR (150.9 MHz, DMSO-*d*<sub>6</sub>)  $\delta$  177.3, 175.4, 139.5, 139.2, 83.7, 82.1, 80.6, 80.4, 53.0, 52.2, 50.6, 48.2, 28.0, 27.4, 33.6, 13.2. IR  $\nu_{\text{max}}/\text{cm}^{-1}$  (tablet KBr): 2993, 2944, 1762, 1688, 1442, 1375, 1225, 1133. HRMS (ESI-TOF): calcd. for C<sub>16</sub>H<sub>17</sub>NO<sub>4</sub>S [M+H]<sup>+</sup> 319.0878; found 319.0882.

(3*a*SR,6*RS*,6*a*SR,7*RS*,7*a*SR,10*a*RS,10*b*SR,10*c*RS)-9-Ethyl-6*a*,7*a*,10*a*,10*c*-tetrahydro-6*H*-3*a*,6:7,10*b*-diepoxyisothiochromeno[4,5-*ef*]isoindole-8,10(1*H*,3*H*,7*H*,9*H*)-dione 2,2-dioxide (**5e**).

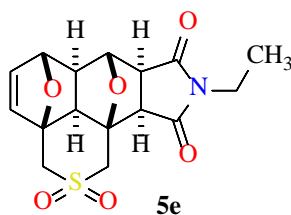

White crystals (2.9 g, 0.0083 mol, 64 %).  $R_f$  0.29 (EtOAc, Sorbfil); mp: 261.3–264.4 °C (with decomp., from *i*-PrOH/DMF). <sup>1</sup>H NMR (600 MHz, DMSO-*d*<sub>6</sub>)  $\delta$  6.52 (1H, dd,  $J = 1.5$  and  $J = 5.6$  Hz, H-5), 6.27 (1H, d,  $J = 5.6$  Hz, H-4), 5.00 (1H, d,  $J = 1.5$  Hz, H-6), 4.74 (1H, s, H-7), 4.09-4.07 (1H, d,  $J = 15.1$  Hz, H-3A), 4.07-4.04 (1H, d,  $J = 15.1$  Hz, H-3B), 3.72 (1H, dd,  $J = 3.0$  and  $J = 14.6$  Hz, H-1A), 3.36-3.34 (2H, m, N-CH<sub>2</sub>-CH<sub>3</sub>), 3.22 (1H, dd,  $J = 3.0$  and  $J = 14.6$  Hz, H-1B), 3.17 (1H, d,  $J = 6.6$  Hz, H-7a), 3.02 (1H, d,  $J = 6.6$  Hz, H-10a), 2.26 (1H, d,  $J = 6.6$  Hz, H-6a), 2.12 (1H, d,  $J = 6.6$  Hz, H-10c), 1.01 (3H, t,  $J = 7.1$  Hz, N-CH<sub>2</sub>-CH<sub>3</sub>). <sup>13</sup>C NMR (150.9 MHz, DMSO-*d*<sub>6</sub>)  $\delta$  176.9, 147.9, 138.8, 138.7, 85.4, 83.8, 81.3, 81.0, 53.5, 51.9, 51.7, 51.1, 47.7, 33.7, 13.3. IR  $\nu_{\text{max}}/\text{cm}^{-1}$  (tablet KBr):

2989, 2956, 1772, 1696, 1448, 1371, 1234, 1125. HRMS (ESI-TOF): calcd. for  $C_{16}H_{17}NO_6S$   $[M+H]^+$  351.3730; found 351.3730.

## 2.4. General procedure for the synthesis of the adducts **6**.

**Table S3.** Selection of conditions for the interaction of *bis*-furan (**1f**) with *N*-phenylmaleimide

| Entry | Solvent          | Temperature, °C | Time | Product   | Yield, % |
|-------|------------------|-----------------|------|-----------|----------|
| 1     | acetone          | 24              | 19 d | <b>6g</b> | 6        |
| 2     | benzene          | 80              | 20 h | <b>6g</b> | 20       |
| 3     | toluene          | 110             | 18 h | <b>6g</b> | 75       |
| 4     | <i>o</i> -xylene | 140             | 12 h | <b>6g</b> | 38       |

*N*-Phenylmaleimide (2.7 g, 0.015 mol) was added to a solution of the appropriate *bis*-diene **1** (0.013 mol) in PhMe (30 mL). The mixture was heated at reflux for 8–12 h (see Table 1). The reaction mixture was cooled and left overnight at room temperature. The precipitated crystals were filtered off and recrystallized from an *i*-PrOH/DMF mixture to give compounds **6**.

(3*aSR*,6*RS*,6*aSR*,7*RS*,7*aSR*,10*aRS*,10*bSR*,10*cRS*)-2-Acetyl-9-phenyl-2,3,6*a*,7*a*,10*a*,10*c*-hexahydro-1*H*,6*H*-3*a*,6:7,10*b*-diepoxybenzo[*de*]pyrrolo[3,4-*h*]isoquinoline-8,10(7*H*,9*H*)-dione (**6a**).

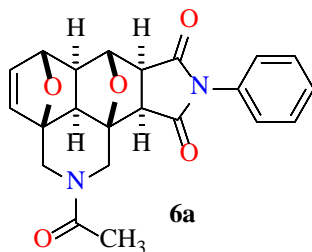

White crystals (3.3 g, 0.0083 mol, 64 %).  $R_f$  0.36 (EtOAc, Sorbfil); mp: 278.9–279.7 °C (with decomp., from *i*-PrOH/DMF). The mixture of amide rotamers in the ratio of 60/40,  $^1H$  NMR (600 MHz, DMSO- $d_6$ )  $\delta$  7.48 (2H, br t,  $J$  = 7.6 Hz, H-3,5-Ph, **maj** + **min**), 7.43



(1H, br t,  $J = 7.6$  Hz, H-4-Ph, **maj** + **min**), 7.18 (1H, br. t,  $J = 7.6$  Hz, H-2,6-Ph, **maj** + **min**), 6.49 (1H, dd,  $J = 1.5$  and  $J = 5.9$  Hz, H-5, **maj**), 6.45 (1H, dd,  $J = 1.5$  and  $J = 5.9$  Hz, H-5, **min**), 6.38 (1H, d,  $J = 5.6$  Hz, H-4, **maj**), 6.35 (1H, d,  $J = 5.6$  Hz, H-4, **min**), 4.96 (1H, d,  $J = 1.5$  Hz, H-6, **maj**), 4.93 (1H, d,  $J = 14.1$  Hz, H-3A, **min**), 4.90 (1H, d,  $J = 1.5$  Hz, H-6, **min**), 4.88 (1H, d,  $J = 14.1$  Hz, H-3A, **maj**), 4.75 (1H, s, H-7, **min**), 4.70 (1H, s, H-7, **maj**), 4.23 (1H, d,  $J = 15.1$  Hz, H-3B, **maj**), 4.06 (1H, d,  $J = 15.1$  Hz, H-3B, **min**), 3.86 (1H, d,  $J = 15.1$  Hz, H-1A, **min**), 3.80 (1H, d,  $J = 14.6$  Hz, H-1A, **maj**), 3.33-3.32 (1H, d,  $J = 7.1$  Hz, H-7a, **min**), 3.29 (1H, d,  $J = 6.6$  Hz, H-7a, **maj**), 3.25-3.23 (1H, d,  $J = 14.6$  Hz, H-1A, **min**), 3.25-3.23 (1H, d,  $J = 14.6$  Hz, H-1B, **maj**), 3.20 (1H, d,  $J = 7.1$  Hz, H-10a, **min**), 3.16 (1H, d,  $J = 6.6$  Hz, H-10a, **maj**), 2.19 (1H, d,  $J = 6.6$  Hz, H-6a, **maj** + **min**), 2.02 (1H, d,  $J = 6.6$  Hz, H-10c, **min**), 2.00 (1H, d,  $J = 6.6$  Hz, H-10c, **maj**), 1.96 (3H, s, COMe, **maj**), 1.94 (3H, s, COMe, **min**).  $^{13}\text{C}$  NMR (151.9 MHz, DMSO- $d_6$ )  $\delta$  176.8, 175.1, 174.9, 169.9, 169.8, 139.0, 138.8, 137.8, 137.6, 132.7, 132.6, 129.6 (2C), 129.5 (2C), 129.1, 128.9, 127.4 (2C), 127.2 (2C), 84.7, 84.6, 83.0, 82.9, 81.5, 81.0 (2C), 80.6, 52.1, 51.9, 51.7, 51.5, 49.3, 49.2, 48.5, 48.4, 46.6, 46.1, 41.7, 41.1, 22.3, 22.2. IR  $\nu_{\text{max}}/\text{cm}^{-1}$  (tablet KBr): 3009, 2982, 1704, 1645, 1503, 1388, 1195. HRMS (ESI-TOF): calcd. for  $\text{C}_{22}\text{H}_{20}\text{N}_2\text{O}_5$   $[\text{M} + \text{H}]^+$  392.1372; found 392.1379.

*tert*-Butyl (3*aSR*,6*RS*,6*aSR*,7*RS*,7*aSR*,10*aRS*,10*bSR*,10*cRS*)-8,10-dioxo-9-phenyl-6*a*,7,7*a*,8,9,10,10*a*,10*c*-octahydro-1*H*,6*H*-3*a*,6:7,10*b*-diepoxybenzo[*de*]pyrrolo[3,4-*h*]isoquinoline-2(3*H*)-carboxylate (**6b**).

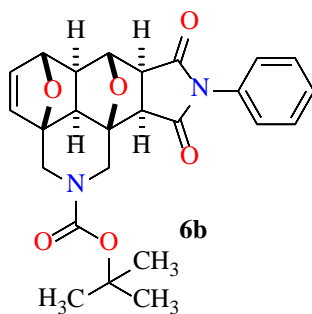

White powder (4.1 g, 0.009 mol, 68%).  $R_f$  0.34 (EtOH : EtOAc, 1 : 8, Sorbfil); mp: 229.2–229.6 °C (with decomp., from *i*-PrOH/DMF).  $^1\text{H}$  NMR (600 MHz,  $\text{CDCl}_3$ )  $\delta$  7.45 (2H, t,  $J = 7.6$  Hz, H-3, 5-Ph), 7.39 (1H, t,  $J = 7.6$  Hz, H-4-Ph), 7.23 (2H, d,  $J = 7.6$  Hz, H-2,6-Ph), 6.46 (1H, br d,  $J = 6.2$  Hz, H-5), 6.28 (1H, d,  $J = 6.2$  Hz, H-4), 5.03 (1H, s, H-7), 4.95 (1H, br s, H-6), 4.83 (2H, m, H-1A and H-3A), 3.45 (2H, m, H-1B and H-3B), 3.13 (1H, br d,  $J = 6.9$  Hz, H-10a), 2.93 (1H, d,  $J = 6.9$  Hz, H-7a), 2.17 (1H, br d,  $J = 6.2$  Hz, H-10c), 1.80 (1H, d,  $J = 6.2$  Hz, H-6a), 1.45 (9H, s, *t*-Bu).  $^{13}\text{C}$  NMR (150.9 MHz,  $\text{CDCl}_3$ )  $\delta$  177.5, 175.7, 153.9, 138.6, 137.3, 131.8, 129.3, 128.9, 126.6 (2C), 84.5, 82.9, 81.4, 81.3, 80.5, 51.7, 51.5, 49.9, 49.0, 44.2, 43.7, 28.4 (3C). IR  $\nu_{\text{max}}/\text{cm}^{-1}$  (tablet KBr): 1776, 1712, 1195, 1157. EI-MS (70 eV)  $m/z$  (relative intensity): 450 (1)  $[\text{M}^+]$ , 349 (6), 194 (9), 157 (36), 138 (24), 128 (15), 96 (20), 81 (21), 57 (100), 43 (31). HRMS (ESI-TOF): calcd. for  $\text{C}_{25}\text{H}_{26}\text{N}_2\text{O}_6$   $[\text{M} + \text{H}]^+$  450.1791; found 450.1778.

*Methyl* (3*aSR*,6*RS*,6*aSR*,7*RS*,7*aSR*,10*aRS*,10*bSR*,10*cRS*)-8,10-dioxo-9-phenyl-6*a*,7,7*a*,8,9,10,10*a*,10*c*-octahydro-1*H*,6*H*-3*a*,6:7,10*b*-diepoxybenzo[*de*]pyrrolo[3,4-*h*]isoquinoline-2(3*H*)-carboxylate (**6c**).

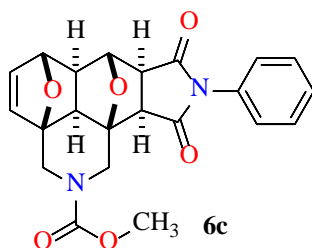

White crystals (2.7 g, 0.006 mol, 49%).  $R_f$  0.35 (EtOAc, Sorbfil); mp: 248.0–249.0 °C (with decomp., from *i*-PrOH/DMF).  $^1\text{H}$  NMR (600 MHz,  $\text{CDCl}_3$ )  $\delta$  7.50–7.41 (2H, m, H-2,6-Ph), 7.27–7.24 (3H, m, H-3-5-Ph), 6.48 (1H, br s, H-5), 6.29 (1H, d,  $J = 5.4$  Hz, H-4), 5.04 (1H, s, H-6), 4.98 (1H, s, H-7), 4.76 (1H, d,  $J = 14.6$  Hz, H-1A), 4.67 (1H, d,  $J = 14.6$  Hz, H-3A), 3.71 (3H, s,  $\text{CO}_2\text{Me}$ ), 3.56–3.35 (2H, m, H-1B and H-3B), 3.13 (1H, d,  $J = 6.8$

Hz, H-7a), 2.97 (2H, d,  $J = 6.8$  Hz, H-10a), 2.18 (1H, br d,  $J = 6.2$  Hz, H-10c), 1.85 (1H, d,  $J = 6.2$  Hz, H-6a).  $^{13}\text{C}$  NMR (151.9 MHz,  $\text{CDCl}_3$ )  $\delta$  175.5 (2C), 156.7, 138.6, 137.1, 131.7, 129.3 (2C), 129.0, 126.7, 126.6, 84.3, 82.9, 82.7, 81.4, 53.2, 51.7, 51.4, 50.0, 48.9, 48.7, 44.4, 43.8. IR  $\nu_{\text{max}}/\text{cm}^{-1}$  (tablet KBr): 1704, 1253, 1196. EI-MS (70 eV)  $m/z$  (relative intensity): 408 (40)  $[\text{M}^+]$ , 235 (30), 176 (27), 154 (95), 105 (42), 91 (31), 81 (100), 59 (62), 45 (42), 43 (64). HRMS (ESI-TOF): calcd. for  $\text{C}_{22}\text{H}_{20}\text{N}_2\text{O}_6$   $[\text{M} + \text{H}]^+$  408.1321; found 408.1335.

(3aSR,6RS,6aSR,7RS,7aSR,10aRS,10bSR,10cRS)-9-Phenyl-2-(trifluoroacetyl)-2,3,6a,7a,10a,10c-hexahydro-1H,6H-3a,6:7,10b-diepoxybenzo[de]pyrrolo[3,4-h]isoquinoline-8,10(7H,9H)-dione (**6d**).

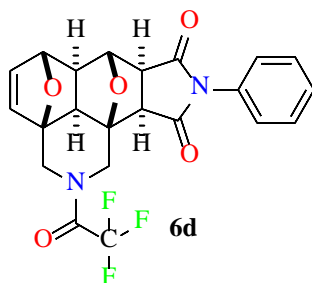

White crystals (5.4 g, 0.012 mol, 90%).  $R_f$  0.39 (EtOAc, Sorbfil); mp: 260.8–262.0 °C (from *i*-PrOH/DMF). The mixture of amide rotamers in the ratio of 50/50,  $^1\text{H}$  NMR (600 MHz,  $\text{DMSO}-d_6$ )  $\delta$  7.54–7.50 (2H, m, H-3,5-Ph, **A+B**), 7.45–7.42 (1H, m, H-4-Ph, **A+B**), 7.19 (1H, br d,  $J = 7.4$  Hz, H-2-Ph, **A+B**), 7.13 (1H, br d,  $J = 7.4$  Hz, H-6-Ph, **A+B**), 6.52 (1H, dd,  $J = 1.6$  and  $J = 5.8$  Hz, H-5, **A**), 6.51 (1H, dd,  $J = 1.6$  and  $J = 5.8$  Hz, H-5, **B**), 6.42 (1H, d,  $J = 5.8$  Hz H-4, **A**), 6.41 (1H, d,  $J = 5.8$  Hz H-4, **B**), 4.99 (1H, br s, H-6, **A**), 4.97 (1H, br s, H-6, **B**), 4.81 (1H, m, H-3A, **A**), 4.79 (1H, br s, H-7, **A**), 4.77 (1H, br s, H-7, **B**), 4.74 (1H, br d,  $J = 14.1$  Hz, H-3A, **B**), 4.24 (1H, br d,  $J = 14.9$  Hz, H-3B, **A**), 4.20 (1H, br d,  $J = 14.9$  Hz, H-3B, **B**), 4.12 (1H, br d,  $J = 14.9$  Hz, H-1A, **A**), 4.09 (1H, br d,  $J = 14.9$  Hz, H-1A, **B**), 3.70 (1H, br d,  $J = 14.1$  Hz, H-1B, **A**), 3.68 (1H, br d,  $J = 14.1$  Hz,

H-1B, **B**), 3.36 (1H, m, H-7a, **A**), 3.33 (1H, m, H-7a, **B**), 3.26 (1H, d,  $J = 7.4$  Hz, H-10a, **A**), 3.25 (1H, d,  $J = 7.4$  Hz, H-10a, **B**), 2.25 (1H, d,  $J = 6.6$  Hz, H-6a, **A**), 2.24 (1H, d,  $J = 6.6$  Hz, H-6a, **B**), 2.13 (1H, d,  $J = 6.2$  Hz, H-10c, **A**), 2.12 (1H, d,  $J = 6.2$  Hz, H-10c, **B**).  $^{13}\text{C}$  NMR (151.9 MHz, DMSO- $d_6$ )  $\delta$  176.7, 176.6, 175.0, 174.8, 156.0 (q,  $^2J_{\text{CF}} = 34.7$  Hz, COCF $_3$ ), 155.9 (q,  $^2J_{\text{CF}} = 34.7$  Hz, COCF $_3$ ), 139.2, 139.1, 137.3, 137.1, 132.7, 132.6, 129.7, 129.6, 129.2, 129.1, 127.3, 136.8 (q,  $^1J_{\text{CF}} = 289.0$  Hz, COCF $_3$ ), 84.3, 84.0, 82.6, 82.2, 81.5, 81.3, 81.1, 80.9, 52.0, 51.9, 51.8, 51.5, 49.5, 49.2, 48.3, 48.1, 45.9 (q,  $^4J_{\text{CF}} = 4.3$  Hz, C-1), 45.2 (q,  $^4J_{\text{CF}} = 4.3$  Hz, C-3), 44.0, 43.2.  $^{19}\text{F}$  NMR (564.7 MHz, DMSO- $d_6$ )  $\delta$  -66.76 (3F, s, CF $_3$ , **min**), -66.86 (3F, s, CF $_3$ , **maj**). IR  $\nu_{\text{max}}/\text{cm}^{-1}$  (tablet KBr): 2985, 1774, 1707, 1253, 1196. HRMS (ESI-TOF): calcd. for C $_{22}$ H $_{17}$ F $_3$ N $_2$ O $_5$  [M + H] $^+$  446.1090; found 446.1078.

(3*aSR*,6*RS*,6*aSR*,7*RS*,7*aSR*,10*aRS*,10*bSR*,10*cRS*)-9-Phenyl-2-(trichloroacetyl)-2,3,6*a*,7*a*,10*a*,10*c*-hexahydro-1*H*,6*H*-3*a*,6:7,10*b*-diepoxybenzo[*de*]pyrrolo[3,4-*h*]isoquinoline-8,10(7*H*,9*H*)-dione (**6e**).

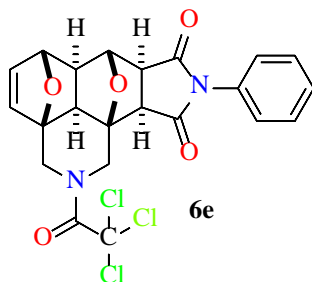

White crystals (4.0 g, 0.0082 mol, 63%).  $R_f$  0.25 (EtOAc : Hexane, 1 : 5, Sorbfil); mp: 170.9–173.2 °C (from *i*-PrOH/DMF).  $^1\text{H}$  NMR (600 MHz, CDCl $_3$ )  $\delta$  7.49 (2H, br t,  $J = 7.6$  Hz, H-3,5-Ph), 7.42 (1H, t,  $J = 7.4$  Hz, H-4-Ph), 7.20 (2H, m, H-2,6-Ph), 6.51 (1H, dd,  $J = 1.0$  and  $J = 5.5$  Hz, H-5), 6.35 (1H, d,  $J = 5.5$  Hz, H-4), 5.28 (1H, br s, H-3A), 5.28 (1H, d,  $J = 14.1$  Hz, H-1A), 5.09 (1H, s, H-7), 5.00 (1H, br s, H-6), 3.81 (1H, br s, H-1B), 3.52 (1H, br s, H-3B), 3.18 (1H, d,  $J = 6.7$  Hz, H-7a), 3.03 (1H, d,  $J = 6.7$  Hz, H-10a), 2.22

(1H, d,  $J = 6.1$  Hz, H-6a), 1.93 (1H, d,  $J = 6.1$  Hz, H-10c).  $^{13}\text{C}$  NMR (151.9 MHz,  $\text{CDCl}_3$ )  $\delta$  175.4, 173.6, 160.9, 138.8, 138.0, 136.9, 131.6, 129.4, 129.1, 128.3, 126.5, 125.4, 92.9, 84.2, 82.7, 81.7, 81.4, 51.6, 51.4, 49.6, 48.9, 21.6. IR  $\nu_{\text{max}}/\text{cm}^{-1}$  (tablet KBr): 2991, 1781, 1723, 1249, 1170. HRMS (ESI-TOF): calcd. for  $\text{C}_{22}\text{H}_{17}\text{Cl}_3\text{N}_2\text{O}_5$   $[\text{M} + \text{H}]^+$  494.0302; found 494.0308.

(3aSR,6RS,6aSR,7RS,7aSR,10aRS,10bSR,10cRS)-2-Benzoyl-9-phenyl-2,3,6a,7a,10a,10c-hexahydro-1H,6H-3a,6:7,10b-diepoxybenzo[de]pyrrolo[3,4-h]isoquinoline-8,10(7H,9H)-dione (**6f**).

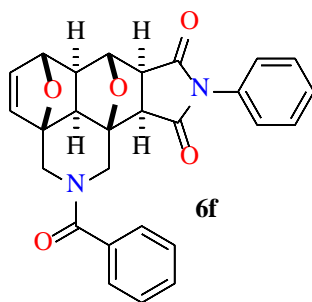

White crystals (4.9 g, 0.011 mol, 81%).  $R_f$  0.43 (EtOH : EtOAc, 1 : 4, Sorbfil); mp: 233.6–134.3 °C (from *i*-PrOH/DMF). The mixture of amide rotamers in the ratio of 56/44,  $^1\text{H}$  NMR (600 MHz,  $\text{CDCl}_3$ )  $\delta$  7.52-7.38 (8H, m, H-Ph, **maj** + **min**), 7.23 (1H, d,  $J = 7.6$  Hz, H-Ph, **maj** + **min**), 6.99 (1H, d,  $J = 7.6$  Hz, H-Ph, **maj** + **min**), 6.49 (1H, d,  $J = 5.6$  Hz, H-5, **maj**), 6.45 (1H, d,  $J = 5.6$  Hz, H-5, **min**), 6.43 (1H, d,  $J = 5.6$  Hz, H-4, **maj**), 6.26 (1H, d,  $J = 5.6$  Hz, H-4, **min**), 5.07 (1H, br s, H-6, **min**), 5.05 (1H, br s, H-7, **min**), 5.01 (1H, br s, H-6, **maj**), 4.99 (1H, br s, H-7, **maj**), 4.80 (1H, d,  $J = 14.1$  Hz, H-3A, **maj** + **min**), 4.08 (1H, d,  $J = 14.6$  Hz, H-3B, **maj** + **min**), 3.81 (1H, t,  $J = 14.1$  Hz, H-1A, **maj** + **min**), 3.51-3.49 (1H, d,  $J = 14.1$  Hz, H-1B, **min**), 3.50-3.47 (1H, d,  $J = 14.1$  Hz, H-1B, **maj**), 3.32 (1H, d,  $J = 7.1$  Hz, H-7a, **maj** + **min**), 3.25 (1H, d,  $J = 6.6$  Hz, H-10a, **min**), 3.12 (1H, d,  $J = 6.6$  Hz, H-10a, **maj**), 2.21 (1H, d,  $J = 6.6$  Hz, H-10c, **maj** + **min**), 2.05 (1H, br d,  $J = 6.6$  Hz, H-6a, **maj** + **min**).  $^{13}\text{C}$  NMR (150.9 MHz,  $\text{DMSO}-d_6$ )  $\delta$  176.1, 174.3,

174.2, 169.9, 169.8, 138.4, 138.2, 137.3, 136.7, 136.0, 135.9, 132.1, 132.0, 129.2, 129.1, 128.9 (2C), 128.5, 128.3, 128.1 (2C), 127.9 (2C), 127.2 (2C), 126.7 (2C), 126.6 (2C), 84.0, 83.8, 82.3, 82.2, 81.1 (2C), 80.6, 80.3, 51.4, 51.2, 50.6, 48.8, 48.4, 48.1, 47.8, 46.9, 46.3, 41.7, 40.9. IR  $\nu_{\text{max}}/\text{cm}^{-1}$  (tablet KBr): 1712, 1617, 1273, 1197. EI-MS (70 eV)  $m/z$  (relative intensity): 454 (35)  $[\text{M}^+]$ , 349 (22), 200 (48), 173 (36), 106 (35), 105 (100), 81 (83), 45 (52). HRMS (ESI-TOF): calcd. for  $\text{C}_{27}\text{H}_{22}\text{N}_2\text{O}_5$   $[\text{M} + \text{H}]^+$  454.1529; found 454.1537.

(3*aSR*,6*RS*,6*aSR*,7*RS*,7*aSR*,10*aRS*,10*bSR*,10*cRS*)-9-Phenyl-6*a*,7*a*,10*a*,10*c*-tetrahydro-6*H*-3*a*,6:7,10*b*-diepoxyisochromeno[4,5-*ef*]isoindole-8,10(1*H*,3*H*,7*H*,9*H*)-dione (**6g**).

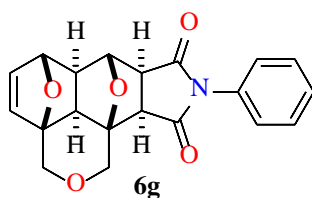

White crystals (3.5 g, 0.01 mol, 75%).  $R_f$  0.43 (EtOAc, Sorbfil); mp: 261.5–262.5 °C (with decomp., from *i*-PrOH/DMF).  $^1\text{H}$  NMR (400 MHz,  $\text{DMSO-}d_6$ )  $\delta$  7.49 (3H, m, H-3-5-Ph), 7.20 (2H, d,  $J = 7.0$  Hz, H-2,6-Ph), 6.45 (1H, dd,  $J = 1.7$  and  $J = 5.7$  Hz, H-5), 6.33 (1H, d,  $J = 5.7$  Hz, H-4), 4.97 (1H, d,  $J = 1.7$  Hz, H-6), 4.75 (1H, s, H-7), 4.14 (1H, d,  $J = 12.7$  Hz, H-1A), 4.01 (2H, d,  $J = 14.0$  Hz, H-3A and H-3B), 3.97 (1H, d,  $J = 12.7$  Hz, H-1B), 3.28 (1H, d,  $J = 7.0$  Hz, H-10a), 3.15 (1H, d,  $J = 7.0$  Hz, H-7a), 2.17 (1H, d,  $J = 6.7$  Hz, H-6a), 1.95 (1H, d,  $J = 6.7$  Hz, H-10c).  $^{13}\text{C}$  NMR (100.6 MHz,  $\text{DMSO-}d_6$ )  $\delta$  175.9, 173.8, 137.5, 136.3, 131.7, 128.4 (2C), 127.9 (2C), 126.3 (2C), 83.2, 81.5, 80.5, 80.0, 64.7, 64.2, 50.8, 50.4, 48.1, 45.8. IR  $\nu_{\text{max}}/\text{cm}^{-1}$  (tablet KBr): 3067, 2991, 1772, 1714, 1595, 1493, 1378. EI-MS (70 eV)  $m/z$  (relative intensity): 351 (40)  $[\text{M}^+]$ , 258 (14), 231 (16), 178 (66), 173 (100), 131 (19), 117 (63), 82 (28), 54 (41), 50 (41). HRMS (ESI-TOF): calcd. for  $\text{C}_{20}\text{H}_{17}\text{NO}_5$   $[\text{M} + \text{H}]^+$  351.1107; found 351.1120.

(3*aSR*,6*RS*,6*aSR*,7*RS*,7*aSR*,10*aRS*,10*bSR*,10*cRS*)-9-Phenyl-6*a*,7*a*,10*a*,10*c*-tetrahydro-6*H*-3*a*,6:7,10*b*-diepoxyisothiochromeno[4,5-*ef*]isoindole-8,10(1*H*,3*H*,7*H*,9*H*)-dione (**6h**).

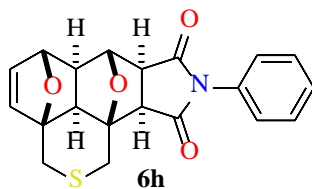

Light-yellow crystals (3.2 g, 0.009 mol, 65%).  $R_f$  0.46 (EtOAc, Sorbfil); mp: 248.0-249.0 °C (from *i*-PrOH/DMF).  $^1\text{H NMR}$  (600 MHz, DMSO- $d_6$ )  $\delta$  7.48 (2H, br t,  $J = 7.5$  Hz, H-3,5-Ph), 7.41 (1H, dt,  $J = 1.6$  and  $J = 7.5$  Hz, H-4-Ph), 7.21 (2H, br d,  $J = 7.5$  Hz, H-2,6-Ph), 6.51 (1H, dd,  $J = 1.7$  and  $J = 5.8$  Hz, H-5), 6.24 (1H, d,  $J = 5.8$  Hz, H-4), 4.97 (1H, d,  $J = 1.7$  Hz, H-6), 4.76 (1H, s, H-7), 3.40 (1H, d,  $J = 14.6$  Hz, H-3A), 3.38 (1H, d,  $J = 14.6$  Hz, H-1A), 3.33 (1H, d,  $J = 6.6$  Hz, H-10a), 3.06 (1H, d,  $J = 6.6$  Hz, H-7a), 2.87 (1H, d,  $J = 14.6$  Hz, H-3B), 2.75 (1H, d,  $J = 6.6$  Hz, H-1B), 2.20 (1H, d,  $J = 6.6$  Hz, H-10c), 1.86 (1H, d,  $J = 6.6$  Hz, H-6a).  $^{13}\text{C NMR}$  (151.9 MHz, DMSO- $d_6$ )  $\delta$  175.6, 173.7, 139.0, 138.8, 131.7, 129.4 (2C), 129.0, 126.6 (2C), 83.9, 82.7, 81.3, 81.1, 53.1, 52.2, 51.2, 49.0, 28.8, 27.9. IR  $\nu_{\text{max}}/\text{cm}^{-1}$  (tablet KBr): 2574, 1774, 1710, 1389, 1198. EI-MS (70 eV)  $m/z$  (relative intensity): 367 (26) [ $\text{M}^+$ ], 235 (15), 194 (37), 174 (37), 173 (50), 113 (100), 81 (28), 80 (66), 43 (17). HRMS (ESI-TOF): calcd. for  $\text{C}_{20}\text{H}_{17}\text{NO}_4\text{S}$  [ $\text{M} + \text{H}$ ] $^+$  367.0878; found 367.0890.

(3*aSR*,6*RS*,6*aSR*,7*RS*,7*aSR*,10*aRS*,10*bSR*,10*cRS*)-9-Phenyl-6*a*,7*a*,10*a*,10*c*-tetrahydro-6*H*-3*a*,6:7,10*b*-diepoxyisothiochromeno[4,5-*ef*]isoindole-8,10(1*H*,3*H*,7*H*,9*H*)-dione 2,2-dioxide (**6i**).

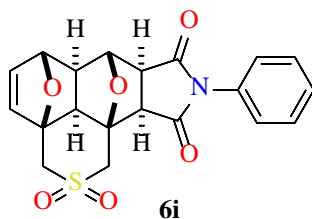

White crystals (3.5 g, 0.0087 mol, 67 %).  $R_f$  0.41 (EtOAc, Sorbfil); mp: 287.4–288.1 °C (with decomp., from *i*-PrOH/DMF). <sup>1</sup>H NMR (600 MHz, DMSO-*d*<sub>6</sub>)  $\delta$  7.49 (2H, br t,  $J = 7.6$  Hz, H-3,5-Ph), 7.42 (1H, br t,  $J = 7.6$  Hz, H-4-Ph), 7.27 (2H, dd,  $J = 1.1$  and  $J = 7.6$  Hz, H-2,6-Ph), 6.54 (1H, dd,  $J = 1.5$  and  $J = 5.5$  Hz, H-5), 6.29 (1H, d,  $J = 5.5$  Hz, H-4), 5.04 (1H, d,  $J = 1.5$  Hz, H-6), 4.86 (1H, s, H-7), 4.13 (1H, d,  $J = 14.6$  Hz, H-3A), 4.09 (1H, d,  $J = 14.6$  Hz, H-1A), 3.75 (1H, dd,  $J = 3.0$  and  $J = 14.6$  Hz, H-1B), 3.42 (1H, dd,  $J = 3.0$  and  $J = 14.6$  Hz, H-3B), 3.35 (1H, d,  $J = 6.6$  Hz, H-7a), 3.32 (1H, d,  $J = 6.6$  Hz, H-10a), 2.34 (1H, d,  $J = 6.6$  Hz, H-10c), 2.20 (1H, d,  $J = 6.6$  Hz, H-6a). <sup>13</sup>C NMR (151.9 MHz, DMSO-*d*<sub>6</sub>)  $\delta$  176.4, 174.3, 138.9, 138.8, 132.5, 129.5 (2C), 129.0, 127.4 (2C), 85.5, 84.3, 81.4, 81.3, 53.9, 51.8, 51.7, 51.5, 50.6, 47.9. IR  $\nu_{\text{max}}$ /cm<sup>-1</sup> (tablet KBr): 3097, 2990, 1775, 1712, 1389, 1125. HRMS (ESI-TOF): calcd. for C<sub>20</sub>H<sub>17</sub>NO<sub>6</sub>S [M + H]<sup>+</sup> 399.0777; found 399.0786.

## 2.5. General procedure for the synthesis of the adducts 8a and 9a.

*N*-Phenylmaleimide (0.30 g, 0.0017 mol) was added to a solution of *bis*-diene **7a** (0.11 g, 0.0009 mol) in PhMe (12 mL). The mixture was heated at reflux for 8–12 h (see Table 3) until no changes were observed according to <sup>1</sup>H NMR. The yellow color of *N*-phenylmaleimide does not disappear by the end of the reaction. The reaction mixture was cooled and left overnight at room temperature. The precipitated crystals were filtered off. The resulting solution was evaporated under reduced pressure. The residue (yellow oil) was purified by column chromatography on silica gel using a mixture of hexane and AcOEt as an eluent.



(3*aRS*,4*RS*,7*SR*,7*aSR*)-4-[2-(Furan-2-yl)ethyl]-2-phenyl-3*a*,4,7,7*a*-tetrahydro-1*H*-4,7-epoxyisoindole-1,3(2*H*)-dione and (3*aSR*,4*RS*,7*SR*,7*aRS*)-4-[2-(furan-2-yl)ethyl]-2-phenyl-3*a*,4,7,7*a*-tetrahydro-1*H*-4,7-epoxyisoindole-1,3(2*H*)-dione (**8a**)

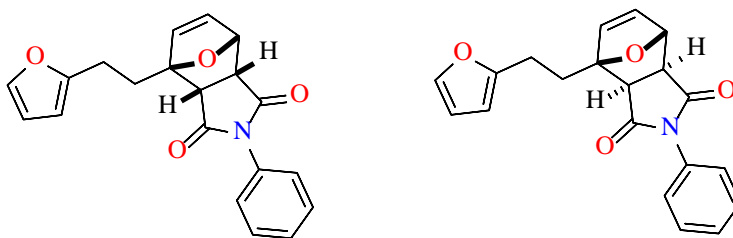

The precipitated white crystals contained the mixture of isomers **8aA** and **8aB** in the ratio of 60:40 (0.06 g, 0.18 mmol, 20 %).  $R_f$  0.20 (EtOAc, Sorbfil).  $^1\text{H NMR}$  (600 MHz,  $\text{DMSO-}d_6$ )  $\delta$  7.44–7.39, 7.34 and 7.23–7.21 (6H, m, H-3-5-Ph and H-5-furyl, **maj+min**), 6.63 (1H, m, H-6, **maj+min**), 6.60 (1H, br d,  $J = 6.1$  Hz, H-5, **maj**), 6.49 (1H, d,  $J = 5.6$  Hz, H-5, **min**), 6.36 (1H, br dd,  $J = 1.5$  and  $J = 3.0$  Hz, H-4-furyl, **min**), 6.34 (1H, br dd,  $J = 1.5$  and  $J = 3.0$  Hz, H-4-furyl, **maj**), 6.15 (1H, br d,  $J = 3.0$  Hz, H-3-furyl, **min**), 6.11 (1H, br d,  $J = 3.0$  Hz, H-3-furyl, **maj**), 5.19 (1H, br d,  $J = 1.5$  Hz, H-7, **maj+min**), 3.34 (4H, s, H-1 and H-2, **maj+min**), 3.23 (1H, br d,  $J = 6.1$  Hz, H-7*a*, **maj+min**), 3.06 (1H, br d,  $J = 6.1$  Hz, H-3*a*, **min**), 3.02 (1H, br d,  $J = 6.1$  Hz, H-3*a*, **maj**).

(3*aRS*,4*SR*,7*RS*,7*aSR*)-4-[2-(Furan-2-yl)ethyl]-2-phenyl-3*a*,4,7,7*a*-tetrahydro-1*H*-4,7-epoxyisoindole-1,3(2*H*)-dione (**8a**)

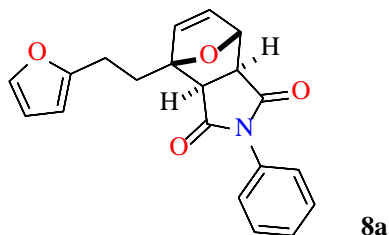

Column chromatography on silica gel (hexane/EtOAc = 1/1) of the residue yielded **8a** as white powder (0.036 g, 0.11 mmol, 12 %).  $R_f$  0.25 (hexane/EtOAc = 1/1, Sorbfil); mp:

125.3–126.6 °C (from hexane/EtOAc = 1/1, SiO<sub>2</sub>). <sup>1</sup>H NMR (300 MHz, DMSO-*d*<sub>6</sub>) δ 7.50–7.39 and 7.23–7.20 (6H, m, H-3-5-Ph and H-5-furyl), 6.64 (1H, br dd, *J* = 1.8 and *J* = 5.9 Hz, H-6), 6.49 (1H, d, *J* = 5.9 Hz, H-5), 6.36 (1H, dd, *J* = 2.2 and *J* = 3.3 Hz, H-4-furyl), 6.14 (1H, dd, *J* = 1.0 and *J* = 3.3 Hz, H-3-furyl), 5.18 (1H, d, *J* = 1.8 Hz, H-7), 3.23 (1H, d, *J* = 6.6 Hz, H-7a), 3.06 (1H, d, *J* = 6.6 Hz, H-3a), 2.92–2.78 (2H, m, H-1), 2.44–2.33 (1H, m, H-2A), 2.23–2.13 (1H, m, H-2B). <sup>13</sup>C NMR (75.5 MHz, DMSO-*d*<sub>6</sub>) δ 176.0, 174.7, 155.3, 141.8, 138.8, 137.8, 132.6, 129.4, 128.9, 127.3, 110.9, 105.7, 91.3, 80.9, 50.9, 49.4, 28.6, 23.8. HRMS (ESI-TOF): calcd. for C<sub>20</sub>H<sub>17</sub>NO<sub>4</sub> [M + H]<sup>+</sup> 335.1158; found 335.1152.

*4,4'*-Ethane-1,2-diylbis(2-phenyl-3a,4,7,7a-tetrahydro-1H-4,7-epoxyisoindole-1,3(2H)-dione) (**9a**)

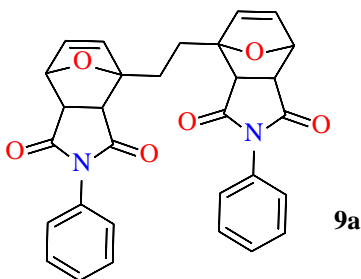

Column chromatography on silica gel (hexane/EtOAc = 1/2) of the residue yielded **9a** as white powder (0.11 g, 0.21 mmol, 23 %). *R<sub>f</sub>* 0.20 (hexane/EtOAc = 1/1, Sorbfil); mp: 136.5–137.1 °C (from EtOAc, SiO<sub>2</sub>). <sup>1</sup>H NMR (300 MHz, DMSO-*d*<sub>6</sub>) δ 7.50–7.40 and 7.22–7.19 (10H, m, H-3-5-Ph and H-3'-5'-Ph), 6.63 (2H, br dd, *J* = 1.0 and *J* = 5.5 Hz, H-6, H-6'), 6.58 (2H, br d, *J* = 6.0 Hz, H-5, H-5'), 5.18 (2H, s, H-7, H-7'), 3.23 (2H, d, *J* = 6.6 Hz, H-7a, H-7a'), 3.01 (2H, d, *J* = 6.3 Hz, H-3a, H-3a'), 2.37–2.23 (2H, m, H-1), 2.08–2.00 (2H, m, H-2). <sup>13</sup>C NMR (75.5 MHz, DMSO-*d*<sub>6</sub>) δ 176.0, 174.6, 139.1, 137.9, 129.4, 128.8, 127.3, 91.6, 80.9, 50.9, 49.7, 25.6. HRMS (ESI-TOF): calcd. for C<sub>30</sub>H<sub>24</sub>N<sub>2</sub>O<sub>6</sub> [M + H]<sup>+</sup> 508.1634; found 508.1638.

## 2.6. General procedure for the synthesis of the adducts **8b** and **9b**.

*N*-Phenylmaleimide (0.36 g, 0.002 mol) was added to a solution of *bis*-diene **7b** (0.20 g, 0.001 mol) in PhMe (15 mL). The mixture was heated at reflux for 8–12 h (see Table 3) until no changes were observed according to <sup>1</sup>H NMR. The yellow color of *N*-phenylmaleimide does not disappear by the end of the reaction. The reaction mixture was cooled and left overnight at room temperature. The resulting solution was evaporated under reduced pressure. The residue (yellow oil) was purified by column chromatography on silica gel using a mixture of hexane and AcOEt as an eluent.

(3*a**R**S*,4*S**R*,7*R**S*,7*a**S**R*)-4-[4-(Furan-2-yl)butyl]-3*a*,7*a*-dimethyl-2-phenyl-3*a*,4,7,7*a*-tetrahydro-1*H*-4,7-epoxyisoindole-1,3(2*H*)-dione (**8b**)

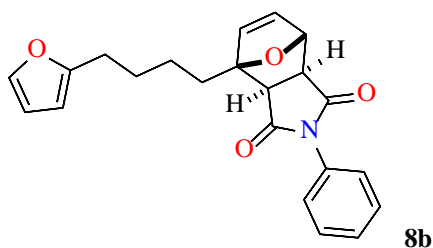

Column chromatography on silica gel (hexane/EtOAc = 1/2) of the residue yielded **8b** as white powder (0.054 g, 0.15 mmol, 15 %). *R*<sub>f</sub> 0.15 (EtOAc, Sorbfil); mp: 146.1–147.3 °C (from hexane/EtOAc = 1/2, SiO<sub>2</sub>). <sup>1</sup>H NMR (700 MHz, CDCl<sub>3</sub>) δ 7.48–7.45, 7.40–7.38 and 7.29–7.26 (6H, m, H-3-5-Ph and H-5-furyl), 6.55 (1H, br dd, *J* = 1.5 and *J* = 5.5 Hz, H-6), 6.42 (1H, d, *J* = 5.7 Hz, H-5), 6.27 (1H, dd, *J* = 1.9 and *J* = 3.2 Hz, H-4-furyl), 5.98 (1H, dd, *J* = 1.0 and *J* = 4.2 Hz, H-3-furyl), 5.32 (1H, d, *J* = 1.7 Hz, H-7), 3.11 (1H, d, *J* = 6.4 Hz, H-7*a*), 2.91 (1H, d, *J* = 6.6 Hz, H-3*a*), 2.68-2.62 (2H, m, -CH<sub>2</sub>-), 2.19-2.15 and 2.07–2.03 (2H, m, -CH<sub>2</sub>-), 1.78-1.69 and 1.59-1.55 (4H, m, -CH<sub>2</sub>-CH<sub>2</sub>-). <sup>13</sup>C NMR (176.1 MHz, CDCl<sub>3</sub>) δ 175.3, 174.0, 156.0, 140.7, 139.0, 137.1, 131.7, 129.1, 128.7, 126.6, 110.1,

104.8, 92.1, 80.9, 50.5, 49.1, 29.4, 28.2, 27.8, 24.8. HRMS (ESI-TOF): calcd. for  $C_{22}H_{21}NO_4$   $[M+H]^+$  363.1471; found 363.1471.

*4,4'-Butane-1,4-diylbis(2-phenyl-3a,4,7,7a-tetrahydro-1H-4,7-epoxyisoindole-1,3(2H)-dione)* (**9b**)

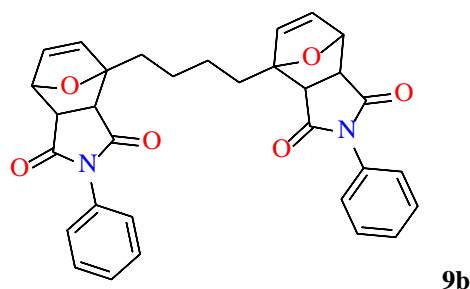

Column chromatography on silica gel (EtOAc) of the residue yielded **9b** as white powder (0.13 g, 0.25 mmol, 25 %).  $R_f$  0.10 (EtOAc, Sorbfil); mp: 154.8–153.3 °C (from EtOAc,  $SiO_2$ ).  $^1H$  NMR (300 MHz,  $CDCl_3$ )  $\delta$  7.48–7.28 (10H, m, H-3-5-Ph and H-3'-5'-Ph), 6.54 (2H, br dd,  $J = 1.1$  and  $J = 5.9$  Hz, H-6, H-6'), 6.42 (2H, br d,  $J = 5.9$  Hz, H-5, H-5'), 5.31 (2H, d,  $J = 1.5$  Hz, H-7, H-7'), 3.10 (2H, d,  $J = 6.6$  Hz, H-7a, H-7a'), 2.90 (2H, d,  $J = 6.6$  Hz, H-3a, H-3a'), 2.21-2.04 (4H, m,  $-CH_2-CH_2-$ ), 1.79-1.60 (4H, m,  $-CH_2-CH_2-$ ).  $^{13}C$  NMR (75.5 MHz,  $CDCl_3$ )  $\delta$  175.3, 174.0, 139.0, 137.1, 129.1, 128.7, 126.6, 92.1, 81.0, 50.5, 49.1, 49.0, 29.6, 29.5, 25.6. HRMS (ESI-TOF): calcd. for  $C_{32}H_{28}N_2O_6$   $[M + H]^+$  536.1947; found 536.1941.

## 2.7. General procedure for the preparation of metathesis products 11–14.

**Table S4.** Selected experiments on variation of conditions of the ROCM reaction of **6g** leading to **14f**

| Entry | Conc. of "RuNMe <sub>2</sub> " | Temperature, °C | Press. of CH <sub>2</sub> =CH <sub>2</sub> , bar | Solvent                         | Time, h | Conversion of 6g, % <sup>a</sup> |
|-------|--------------------------------|-----------------|--------------------------------------------------|---------------------------------|---------|----------------------------------|
| 1     | 5 mol %                        | 100             | 1                                                | CH <sub>2</sub> Cl <sub>2</sub> | 6       | 83                               |
| 2     | 5 mol %                        | 100             | 2                                                | CH <sub>2</sub> Cl <sub>2</sub> | 6       | 100                              |
| 3     | 5 mol %                        | 100             | 5                                                | CH <sub>2</sub> Cl <sub>2</sub> | 6       | 100                              |

|    |                 |     |   |                                 |   |     |
|----|-----------------|-----|---|---------------------------------|---|-----|
| 4  | 5 mol %         | 60  | 2 | CH <sub>2</sub> Cl <sub>2</sub> | 6 | 48  |
| 5  | 5 mol %         | 80  | 2 | CH <sub>2</sub> Cl <sub>2</sub> | 6 | 59  |
| 6  | 5 mol %         | 100 | 2 | CH <sub>2</sub> Cl <sub>2</sub> | 6 | 100 |
| 7  | 5 mol %         | 100 | 2 | CH <sub>2</sub> Cl <sub>2</sub> | 4 | 97  |
| 8  | 5 mol %         | 100 | 2 | CH <sub>2</sub> Cl <sub>2</sub> | 2 | 92  |
| 9  | 1 mol %         | 100 | 2 | CH <sub>2</sub> Cl <sub>2</sub> | 6 | 53  |
| 10 | 3 mol %         | 100 | 2 | CH <sub>2</sub> Cl <sub>2</sub> | 6 | 76  |
| 11 | 5 mol %         | 100 | 2 | CH <sub>2</sub> Cl <sub>2</sub> | 6 | 100 |
| 12 | 10 mol %        | 100 | 2 | CH <sub>2</sub> Cl <sub>2</sub> | 6 | 100 |
| 13 | 5 mol %         | 100 | 2 | CHCl <sub>3</sub>               | 6 | 98  |
| 14 | 5 mol %         | 100 | 2 | PhH                             | 6 | 83  |
| 15 | HG-II (5 mol %) | 100 | 2 | CH <sub>2</sub> Cl <sub>2</sub> | 6 | 100 |

<sup>a</sup> Conversion of **6g** into **14f** was established by <sup>1</sup>H NMR analysis of the crude reaction mixtures after separation of the catalyst and by-products and evaporation of the solvent.

A solution of the starting compound **3–6** (100 mg) in dichloromethane (20 mL, previously passed through an alumina layer of ~ 1 cm thickness) was loaded into a steel autoclave (75 mL) with a magnetic stirrer (see Fig. S6). A portion of the ruthenium catalyst (5 mol %) in dichloromethane (5 mL) was injected inside using a syringe. The flask was purged with ethylene (pressurized up to 2 bar, 5 times), a stirring was turned on (500 rpm) and the initial ethylene pressure was set at room temperature (20–25 °C). After the ethylene pressure was set constant, the ethylene supply valve was shut off and the heating was turned on to the experimental temperature of 100 °C. During heating, the pressure in the system increased to the working one (6 bar) and slightly changed during the experiment. The reaction mixture was held at 100 °C for 6 h, after that the reactor was cooled to room temperature. After cooling the reactor, ethylene pressure began to gradually decrease. The resulting solution was transferred into a glass flask and evaporated under reduced pressure. The residue (dark brown oil) was purified by column chromatography on silica gel.

*(3aSR,5RS,5aSR,6RS,6aSR,9aRS,9bSR,9cRS)-2-Acetyl-3a,5-diethenyloctahydro-1H,5H-6,9b-epoxydifuro[2,3,4-de:3',4'-h]isoquinoline-7,9-dione (11a).*

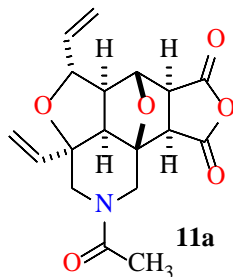

Column chromatography on silica gel (EtOAc) of the residue yielded **11a** as light-yellow powder (0.063 g, 0.18 mmol, 58 %).  $R_f$  0.10 (EtOAc, Sorbfil); mp: 199.3–203.6 °C (with decamp., from EtOAc, SiO<sub>2</sub>). The mixture of amide rotamers in the ratio of 67/33, <sup>1</sup>H NMR (600.17 MHz, CDCl<sub>3</sub>)  $\delta$  5.96–5.85 (2H, m, H-1-Vinyl-5 and H-1-Vinyl-3a, **maj** + **min**), 5.34 (1H, d,  $J$  = 17.6 Hz, H-2-Vinyl-5-*trans*, **maj** + **min**), 5.29-5.26 (1H, br d,  $J$  = 17.2 Hz, H-2-Vinyl-3a-*trans*, **maj** + **min**), 5.23 (1H, br d,  $J$  = 11.1 Hz, H-2-Vinyl-5-*cis*, **maj**), 5.20-5.18 (1H, br d,  $J$  = 10.1 Hz, H-2-Vinyl-3a-*cis*, **maj**), 5.19-5.18 (1H, br d,  $J$  = 10.6 Hz, H-2-Vinyl-3a-*cis*, **min**), 5.16 (1H, br d,  $J$  = 10.1 Hz, H-2-Vinyl-5-*cis*, **min**), 4.86 (1H, s, H-6, **min**), 4.84 (1H, s, H-6, **maj**), 4.62 (1H, d,  $J$  = 13.6 Hz, H-3A, **maj**), 4.34-4.31 (1H, m, H-5, **maj** + **min**), 4.17 (2H, d,  $J$  = 14.6 Hz, H-3A and H-3B, **min**), 3.87 (1H, d,  $J$  = 15.1 Hz, H-1A, **min**), 3.79 (1H, d,  $J$  = 14.1 Hz, H-3B, **maj**), 3.68 (1H, d,  $J$  = 15.6 Hz, H-1A, **maj**), 3.42 (1H, d,  $J$  = 7.6 Hz, H-6a, **min**), 3.37 (1H, d,  $J$  = 7.6 Hz, H-6a, **maj**), 3.32 (1H, d,  $J$  = 13.6 Hz, H-1B, **min**), 3.27 (1H, d,  $J$  = 14.6 Hz, H-1B, **maj**), 3.23 (1H, m, H-9a, **min**), 3.21 (1H, d,  $J$  = 7.1 Hz, H-9a, **maj**), 2.69-2.65 (1H, m, H-5a, **maj** + **min**), 2.43-2.40 (1H, m, H-9c, **maj** + **min**), 2.13 (3H, s, NCOCH<sub>3</sub>, **min**), 2.11 (3H, s, NCOCH<sub>3</sub>, **maj**). <sup>13</sup>C NMR (150.9 MHz, CDCl<sub>3</sub>)  $\delta$  170.9, 170.5, 170.4, 170.2, 168.7, 168.2, 140.8, 140.5, 138.1, 137.9, 117.7, 117.4, 115.8, 115.5, 85.6, 85.5, 85.3, 85.2, 83.5, 82.8, 82.3, 56.1, 53.4, 53.2, 52.3, 50.6, 50.5, 50.2, 45.5, 44.9, 41.7, 21.8, 21.6. IR  $\nu_{\max}/\text{cm}^{-1}$  (tablet KBr): 3054, 3029, 2971, 1857, 1789, 1724, 1441, 1232, 1066. HRMS (ESI-TOF): calcd. for C<sub>18</sub>H<sub>19</sub>NO<sub>6</sub> [M + H]<sup>+</sup> 345.1212; found 345.1216.

*tert*-Butyl (3*aSR*,5*RS*,5*aSR*,6*RS*,6*aSR*,9*aRS*,9*bSR*,9*cRS*)-3*a*,5-diethenyl-7,9-dioxooctahydro-1*H*,5*H*-6,9*b*-epoxydifuro[2,3,4-*de*:3',4'-*h*]isoquinoline-2(3*H*)-carboxylate (**11b**).

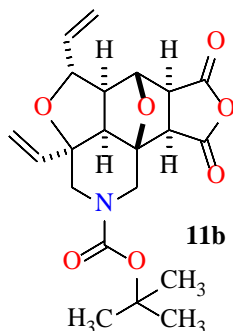

Column chromatography on silica gel (Hexane/EtOAc = 2/1) of the residue yielded **11b** as yellow oil (0.065 g, 0.16 mmol, 61 %).  $R_f$  0.10 (EtOAc : Hexane, 1:1, Sorbfil); mp: 200.6–203.4 °C (with decomp., from Hexane/EtOAc = 2/1, SiO<sub>2</sub>). The mixture of amide rotamers in the ratio of 54/46, <sup>1</sup>H NMR (600.17 MHz, CDCl<sub>3</sub>)  $\delta$  5.96-5.88 (2H, m, H-1-Vinyl-5 and H-1-Vinyl-3a, **maj** + **min**), 5.33-5.30 (2H, br d,  $J = 17.2$  Hz, H-2-Vinyl-5-*trans* and H-2-Vinyl-3a-*trans*, **maj**), 5.32-5.29 (2H, br d,  $J = 17.2$  Hz, H-2-Vinyl-5-*trans* and H-2-Vinyl-3a-*trans*, **min**), 5.21-5.20 (2H, br d,  $J = 10.1$  Hz, H-2-Vinyl-5-*cis* and H-2-Vinyl-3a-*cis*, **min**), 5.17-5.16 (2H, br d,  $J = 10.1$  Hz, H-2-Vinyl-5-*cis* and H-2-Vinyl-3a-*cis*, **maj**), 4.82 (1H, s, H-6, **maj** + **min**), 4.25 (1H, m, H-5, **maj** + **min**), 4.07 (1H, t,  $J = 15.6$  Hz, H-3A, **maj** + **min**), 3.93 (1H, d,  $J = 15.1$  Hz, H-3B, **maj**), 3.87 (1H, d,  $J = 15.1$  Hz, H-3B, **min**), 3.59-3.57 (2H, m, H-1B, **min** and H-1A, **maj** + **min**), 3.51 (1H, d,  $J = 13.6$  Hz, H-1B, **maj**), 3.37 (1H, br t,  $J = 8.1$  Hz, H-6a, **maj** + **min**), 3.19-3.18 (1H, br d,  $J = 7.1$  Hz, H-9a, **maj** + **min**), 2.66 (1H, br t,  $J = 7.6$  Hz, H-5a, **maj** + **min**), 2.37 (1H, d,  $J = 8.1$  Hz, H-9c, **maj** + **min**), 1.47 (9H, s, NCO(CH<sub>3</sub>)<sub>3</sub>, **min**), 1.45 (9H, s, NCO(CH<sub>3</sub>)<sub>3</sub>, **maj**). <sup>13</sup>C NMR (150.91 MHz, CDCl<sub>3</sub>)  $\delta$  171.2, 170.3, 168.2, 168.0, 155.0, 154.9, 140.3, 140.2, 137.2, 117.7, 114.6, 114.5, 86.0, 84.3, 84.2, 83.1, 81.7, 80.6, 80.5, 56.7, 53.9, 53.7, 52.2, 50.5, 50.4, 46.2, 44.6, 42.9, 42.3, 28.3. IR  $\nu_{max}/cm^{-1}$  (tablet KBr): 3069, 3028, 2987,

1856, 1779, 1717, 1439, 1232, 1082. HRMS (ESI-TOF): calcd. for  $C_{21}H_{25}NO_7$   $[M + H]^+$  403.4310; found 403.4304.

(3*aSR*,5*RS*,5*aSR*,6*RS*,6*aSR*,9*aRS*,9*bSR*,9*cRS*)-2-Benzoyl-3*a*,5-diethenyloctahydro-1*H*,5*H*-6,9*b*-epoxydifuro[2,3,4-*de*:3',4'-*h*]isoquinoline-7,9-dione (**11c**).

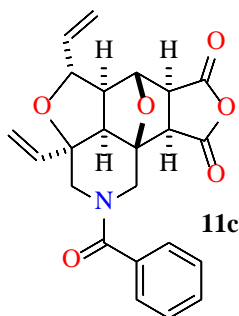

Column chromatography on silica gel (EtOAc) of the residue yielded **11c** as brown oil (0.038 g, 0.095 mmol, 36 %).  $R_f$  0.10 (EtOAc, Sorbfil). The mixture of amide rotamers in the ratio of 80/20,  $^1H$  NMR (600.17 MHz,  $CDCl_3$ )  $\delta$  7.42–7.37 (5H, m, H-Ph, **maj** + **min**), 5.88–5.76 (2H, m, H-1-Vinyl-5 and H-1-Vinyl-3*a*, **maj** + **min**), 5.26–5.14 (4H, m, H-2-Vinyl-5 and H-2-Vinyl-3*a*, **maj** + **min**), 4.85 (1H, s, H-6, **maj** + **min**), 4.66 (1H, d,  $J = 15.1$  Hz, H-3*A*, **maj**), 4.55 (1H, m, H-3*A*, **min**), 4.40 (1H, m, H-5, **min**), 4.31 (1H, m, H-5, **maj**), 4.24 (1H, m, H-3*B*, **min**), 3.91 (1H, d,  $J = 15.1$  Hz, H-3*B*, **maj**), 3.80 (1H, d,  $J = 13.6$  Hz, H-1*A*, **maj** + **min**), 3.41–3.55 (2H, m, H-9*a* and H-6*a*, **maj** + **min**), 3.27 (1H, d,  $J = 13.6$  Hz, H-1*B*, **maj** + **min**), 2.67–2.65 (1H, m, H-5*a*, **maj** + **min**), 2.50 (1H, d,  $J = 8.1$  Hz, H-9*c*, **maj** + **min**).  $^{13}C$  NMR (150.91 MHz,  $CDCl_3$ )  $\delta$  171.9, 171.2, 170.6, 168.5, 140.1, 137.7, 135.3, 135.1, 129.9, 129.8, 128.5, 128.4, 127.5, 117.5, 115.6, 85.4, 85.0, 83.3, 83.2, 82.4, 56.1, 53.0, 52.4, 50.5, 50.3, 41.9. IR  $\nu_{max}/cm^{-1}$  (tablet KBr): 3077, 3015, 2991, 1842, 1781, 1719, 1450, 1241, 1094. HRMS (ESI-TOF): calcd. for  $C_{23}H_{21}O_6$   $[M + H]^+$  407.1369; found 407.1365.



(3*aSR*,5*RS*,5*aSR*,6*RS*,6*aSR*,9*aRS*,9*bSR*,9*cRS*)-3*a*,5-Diethenylhexahydro-3*H*,5*H*-6,9*b*-epoxydifuro[2,3,4-*de*:3',4'-*h*]isochromene-7,9(1*H*)-dione (**11d**).

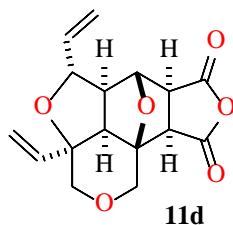

Column chromatography on silica gel (hexane/EtOAc = 2/1) of the residue yielded **11d** as grey powder (0.055 g, 0.18 mmol, 50 %).  $R_f$  0.10 (EtOAc : Hexane, 1:1, Sorbfil); mp: 201.4–205.2 °C (with decomp., from Hexane/EtOAc = 2/1, SiO<sub>2</sub>). <sup>1</sup>H NMR (600.17 MHz, CDCl<sub>3</sub>, 23.8 °C)  $\delta$  5.95 (1H, ddd,  $J = 8.3$ ,  $J = 10.6$  and  $J = 17.2$  Hz, H-1-Vinyl-5), 5.86 (1H, dd,  $J = 10.6$  and  $J = 17.2$  Hz, H-1-Vinyl-3*a*), 5.36 (1H, d,  $J = 17.2$  Hz, H-2-Vinyl-5-*trans*), 5.24 (2H, m, H-2-Vinyl), 5.15 (1H, br d,  $J = 10.6$  Hz, H-2-Vinyl-5-*cis*), 4.91 (1H, s, H-6), 4.49 (1H, dd,  $J = 4.0$  and  $J = 8.3$  Hz, H-5), 4.40 (1H, d,  $J = 13.6$  Hz, H-3*A*), 4.03 (1H, d,  $J = 13.6$  Hz, H-3*B*), 3.94 (1H, d,  $J = 12.6$  Hz, H-1*A*), 3.36 (1H, d,  $J = 7.3$  Hz, H-6*a*), 3.34 (1H, d,  $J = 12.6$  Hz, H-1*B*), 3.15 (1H, d,  $J = 7.3$  Hz, H-9*a*), 2.71 (1H, dd,  $J = 4.0$  and  $J = 7.6$  Hz, H-5*a*), 2.38 (1H, d,  $J = 7.6$  Hz, H-9*c*). <sup>13</sup>C NMR (150.91 MHz, CDCl<sub>3</sub>, 24.0 °C)  $\delta$  170.1, 140.7, 138.8, 117.2, 116.4, 86.7, 83.3, 82.5, 70.7, 65.6, 55.5, 51.7, 51.3, 50.2, 29.7. IR  $\nu_{\max}/\text{cm}^{-1}$  (tablet KBr): 3083, 3012, 2985, 1865, 1779, 1711, 1448, 1237, 1099. HRMS (ESI-TOF): calcd. for C<sub>16</sub>H<sub>16</sub>O<sub>6</sub> [M + H]<sup>+</sup> 304.0947; found 304.0952.

(3*aSR*,5*RS*,5*aSR*,6*RS*,6*aSR*,9*aRS*,9*bSR*,9*cRS*)-3*a*,5-Diethenylhexahydro-3*H*,5*H*-6,9*b*-epoxyisothiochromeno[4,5-*bc*:7,8-*c'*]difuran-7,9(1*H*)-dione (**11e**).

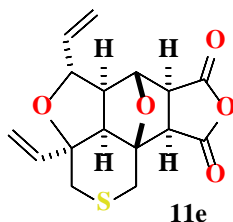

Column chromatography on silica gel (Hexane/EtOAc = 1/1) of the residue yielded **11e** as grey powder (0.0036 g, 0.11 mmol, 33%).  $R_f$  0.15 (EtOAc : Hexane, 1:1, Sorbfil); mp: 129.2–130.9 °C (with decomp., from Hexane/EtOAc = 1/1, SiO<sub>2</sub>). <sup>1</sup>H NMR (600.17 MHz, CDCl<sub>3</sub>)  $\delta$  6.15 (1H, dd,  $J = 10.6$  and  $J = 17.2$  Hz, H-1-Vinyl-3a), 5.96 (1H, ddd,  $J = 8.1$ ,  $J = 10.1$  and  $J = 17.6$  Hz, H-1-Vinyl-5), 5.37 (1H, d,  $J = 17.7$  Hz, H-2-Vinyl-5-*trans*), 5.33 (1H, dd,  $J = 1.0$  and  $J = 16.6$  Hz, H-2-Vinyl-3a-*trans*), 5.21-5.20 (1H, br d,  $J = 10.6$  Hz, H-2-Vinyl-5-*cis*), 5.20-5.18 (1H, br d,  $J = 11.1$  Hz, H-2-Vinyl-3a-*cis*), 4.86 (1H, s, H-6), 4.39 (1H, t,  $J = 7.1$  Hz, H-5), 3.36 (1H, d,  $J = 7.6$  Hz, H-6a), 3.24 (1H, d,  $J = 14.6$  Hz, H-3A), 3.17 (1H, d,  $J = 14.6$  Hz, H-3B), 3.08 (1H, d,  $J = 7.1$  Hz, H-9a), 2.98 (1H, d,  $J = 14.1$  Hz, H-1A), 2.66 (1H, dd,  $J = 6.1$  and  $J = 8.1$  Hz, H-5a), 2.54 (1H, d,  $J = 14.1$  Hz, H-1B), 2.30 (1H, d,  $J = 8.6$  Hz, H-9c). <sup>13</sup>C NMR (150.91 MHz, CDCl<sub>3</sub>)  $\delta$  170.2, 168.2, 142.2, 137.8, 118.0, 114.6, 85.8, 84.8, 82.7, 82.0, 56.5, 54.4, 54.1, 51.0, 32.7, 26.1. IR  $\nu_{\max}/\text{cm}^{-1}$  (tablet KBr): 3088, 3016, 2991, 1860, 1770, 1700, 1443, 1246, 1083. HRMS (ESI-TOF): calcd. for C<sub>16</sub>H<sub>16</sub>O<sub>5</sub>S [M + H]<sup>+</sup> 320.0718; found 320.0722.

(3*aSR*,5*RS*,5*aSR*,6*RS*,6*aSR*,9*aRS*,9*bSR*,9*cRS*)-3*a*,5-Diethenyl-8-methylhexahydro-3*H*-6,9*b*-epoxy-4-oxa-2-thia-8-azacyclopenta[*e*]acenaphthylene-7,9(1*H*,5*H*,8*H*)-dione 2,2-dioxide (**12a**).

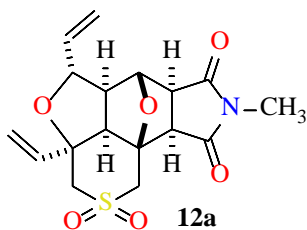

Obtained crystals recrystallized from an EtOH/DMF (20 ml) to give the pure **12a** as white crystals (0.034 g, 0.09 mmol, 32%).  $R_f$  0.54 (EtOAc : Hexane, 1:2, Sorbfil); mp: 246.9–254.6 °C (with decomp., from EtOH/DMF). <sup>1</sup>H NMR (600.17 MHz, CDCl<sub>3</sub>, 22.4 °C)  $\delta$  6.34 (1H, dd,  $J = 10.6$  and  $J = 17.2$  Hz, H-1-Vinyl-3a), 5.95 (1H, ddd,  $J = 7.6$ ,  $J =$

10.1 and  $J = 17.2$  Hz, H-1-Vinyl-5), 5.53 (1H, d,  $J = 17.2$  Hz, H-2-Vinyl-3a-*trans*), 5.42 (1H, d,  $J = 17.2$  Hz, H-2-Vinyl-5-*trans*), 5.31 (1H, d,  $J = 10.1$  Hz, H-2-Vinyl-5-*cis*), 5.27 (1H, d,  $J = 10.6$  Hz, H-2-Vinyl-3a-*cis*), 4.81 (1H, s, H-6), 4.22 (1H, t, H-5), 3.85 (1H, d,  $J = 15.6$  Hz, H-3), 3.79 (1H, d,  $J = 15.6$  Hz, H-3), 3.62 (1H, d,  $J = 14.1$  Hz, H-1A), 3.22 (1H, d,  $J = 14.1$  Hz, H-1B), 3.07 (1H, d,  $J = 6.6$  Hz, H-6a), 2.99 (3H, s, N-*Me*), 2.94 (1H, d,  $J = 6.6$  Hz, H-9a), 2.71 (1H, dd,  $J = 7.8$  and  $J = 9.1$  Hz, H-5a), 2.60 (1H, d,  $J = 9.1$  Hz, H-9c).  $^{13}\text{C}$  NMR (150.91 MHz,  $\text{CDCl}_3$ , 23.8 °C)  $\delta$  175.2, 173.3, 138.8, 135.6, 119.0, 115.3, 85.0, 83.4, 83.1, 80.7, 57.4, 56.3, 54.9, 52.6, 52.5, 49.7, 25.5. IR  $\nu_{\text{max}}/\text{cm}^{-1}$  (tablet KBr): 3079, 2992, 1775, 1692, 1440, 1294, 1131. HRMS (ESI-TOF): calcd. for  $\text{C}_{17}\text{H}_{19}\text{NO}_6\text{S}$  [ $\text{M} + \text{H}$ ] $^+$  365.0933; found 365.0920.

(3*aSR*,5*RS*,5*aSR*,6*RS*,6*aSR*,9*aRS*,9*bSR*,9*cRS*)-3*a*,5-Diethenyl-8-ethyl-2-(trifluoroacetyl)octahydro-1*H*-6,9*b*-epoxyfuro[2,3,4-*de*]pyrrolo[3,4-*h*]isoquinoline-7,9(5*H*,8*H*)-dione (**13a**).

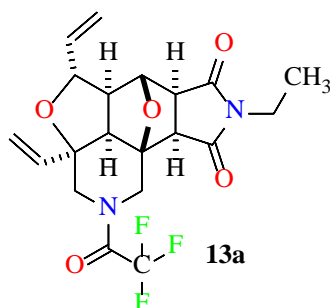

Column chromatography on silica gel (hexane/EtOAc = 4/1) of the residue yielded **13a** as light-yellow oil (0.05 g, 0.12 mmol, 47 %).  $R_f$  0.15 (EtOAc : Hexane, 1:2, Sorbfil). The mixture of amide rotamers in the ratio of 62/38,  $^1\text{H}$  NMR (600.17 MHz,  $\text{CDCl}_3$ , 23.2 °C)  $\delta$  5.97–5.87 (2H, m, H-1-Vinyl-3a, H-1-Vinyl-5, **maj+min**), 5.34-5.15 (4H, m, H-2-Vinyl-3a, H-2-Vinyl-5, **maj+min**), 4.73 (1H, s, H-6, **maj**), 4.73 (1H, s, H-6, **min**), 4.32-4.25 (2H, m, H-5, H-1A, **maj + min**), 4.09 (1H, d,  $J = 14.6$  Hz, H-1B, **min**), 4.06 (1H, d,  $J = 14.6$  Hz, H-3B, **min**), 3.91 (1H, d,  $J = 14.6$  Hz, H-1B, **maj**), 3.85 (1H, d,  $J = 14.6$  Hz, H-3B,

**maj**), 3.57-3.53 (2H, m, N-CH<sub>2</sub>-CH<sub>3</sub>, **maj** + **min**), 3.48 (1H, dd,  $J = 3.0$  and  $J = 14.6$  Hz, H-3A, **maj** + **min**), 3.07 (1H, d,  $J = 7.1$  Hz, H-6a, **min**), 3.04 (1H, d,  $J = 7.1$  Hz, H-6a, **maj**), 2.91 (1H, d,  $J = 7.1$  Hz, H-9a, **maj**), 2.89 (1H, d,  $J = 7.1$  Hz, H-9a, **maj**), 2.69-2.66 (1H, m, H-5a, **maj** + **min**), 2.47 (1H, d,  $J = 9.1$  Hz, H-9c, **maj** + **min**), 1.17-1.14 (3H, m, N-CH<sub>2</sub>-CH<sub>3</sub>, **maj** + **min**). <sup>13</sup>C NMR (150.91 MHz, CDCl<sub>3</sub>, 23.6 °C)  $\delta$  175.6, 173.8, 173.4, 157.0 (1C, q,  $^2J_{CF} = 37.6$  Hz, COCF<sub>3</sub>), 157.1 (1C, q,  $^2J_{CF} = 37.6$  Hz, COCF<sub>3</sub>), 140.1, 139.3, 137.8, 137.1, 117.8, 117.4, 116.1 (1C, q,  $^1J_{CF} = 287.6$  Hz, COCF<sub>3</sub>), 116.3 (1C, q,  $^1J_{CF} = 287.6$  Hz, COCF<sub>3</sub>), 115.7, 115.4, 85.2, 84.6, 84.0, 83.7, 82.8, 82.5, 81.8, 81.2, 56.9, 56.5, 54.0, 53.7, 51.2, 51.0, 49.5, 49.4, 47.4 (1C, q,  $^4J_{CF} = 4.3$  Hz, C-1), 46.1, 44.4 (1C, q,  $^4J_{CF} = 4.3$  Hz, C-1), 43.4, 34.3, 12.9, 12.8. <sup>19</sup>F NMR (564.7 MHz, CDCl<sub>3</sub>, 22.5 °C)  $\delta$  -68.02 (3F, s, CF<sub>3</sub>, **maj**), -68.99 (3F, s, CF<sub>3</sub>, **min**). IR  $\nu_{max}/cm^{-1}$  (tablet KBr): 2987, 2944, 2877, 1772, 1693, 1452, 1411, 1348, 1195, 1148. HRMS (ESI-TOF): calcd. for C<sub>20</sub>H<sub>21</sub>F<sub>3</sub>N<sub>2</sub>O<sub>5</sub> [M + H]<sup>+</sup> 426.1403; found 426.1411.

(3*aSR*,5*RS*,5*aSR*,6*RS*,6*aSR*,9*aRS*,9*bSR*,9*cRS*)-3*a*,5-Diethenyl-8-ethylhexahydro-3*H*-6,9*b*-epoxy-2,4-dioxo-8-azacyclopenta[*e*]acenaphthylene-7,9(1*H*,5*H*,8*H*)-dione (**13b**).

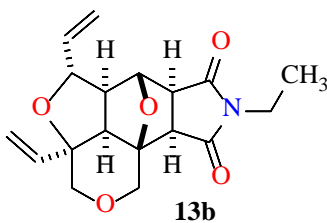

Column chromatography on silica gel (Hexane/EtOAc = 3/1) of the residue yielded **13b** as grey powder (0.06 g, 0.17 mmol, 52%).  $R_f$  0.63 (EtOAc : Hexane, 1:2, Sorbfil); mp: 183.4–193.8 °C (with decomp., from Hexane/EtOAc = 3/1, SiO<sub>2</sub>). <sup>1</sup>H NMR (600.17 MHz, CDCl<sub>3</sub>, 24.4 °C)  $\delta$  5.96 (1H, ddd,  $J = 8.1$ ,  $J = 10.1$  and  $J = 16.7$  Hz, H-1-Vinyl-5), 5.87 (1H, dd,  $J = 11.1$  and  $J = 17.7$  Hz, H-1-Vinyl-3a), 5.35 (1H, dd,  $J = 1.0$  and  $J = 17.2$  Hz, H-2-Vinyl-5-*trans*), 5.22 (2H, m, H-2-Vinyl), 5.12 (1H, dd,  $J = 1.0$  and  $J = 11.1$  Hz, H-2-

Vinyl-*cis*), 4.74 (1H, s, H-6), 4.47 (1H, dd,  $J = 4.3$  and  $J = 8.1$  Hz, H-5), 4.33 (1H, d,  $J = 13.1$  Hz, H-3A), 4.04 (1H, d,  $J = 13.1$  Hz, H-3B), 3.93 (1H, d,  $J = 12.6$  Hz, H-7A), 3.55 (2H, q,  $J = 7.1$  Hz, N-CH<sub>2</sub>-CH<sub>3</sub>), 3.32 (1H, d,  $J = 12.6$  Hz, H-1B), 3.03 (1H, d,  $J = 6.7$  Hz, H-6a), 2.80 (1H, d,  $J = 6.7$  Hz, H-9a), 2.68 (1H, dd,  $J = 4.3$  and  $J = 7.6$  Hz, H-5a), 2.37 (1H, d,  $J = 7.6$  Hz, H-9c), 1.14 (3H, t,  $J = 7.1$  Hz, N-CH<sub>2</sub>-CH<sub>3</sub>). <sup>13</sup>C NMR (150.9 MHz, CDCl<sub>3</sub>, 24.1 °C)  $\delta$  176.2, 174.2, 141.2, 139.4, 116.8, 116.1, 86.9, 82.7, 82.6, 70.8, 66.2, 55.8, 51.9, 50.9, 49.3, 34.2, 13.0. IR  $\nu_{\text{max}}/\text{cm}^{-1}$  (tablet KBr): 3083, 3006, 1773, 1702, 1445, 1403, 1226, 1147. HRMS (ESI-TOF): calcd. for C<sub>18</sub>H<sub>21</sub>NO<sub>5</sub> [M + H]<sup>+</sup> 331.1420; found 331.1432.

(3*aSR*,5*RS*,5*aSR*,6*RS*,6*aSR*,9*aRS*,9*bSR*,9*cRS*)-3*a*,5-Diethenyl-8-ethyl-5*a*,6*a*,9*a*,9*c*-tetramethylhexahydro-3*H*-6,9*b*-epoxy-4-oxa-2-thia-8-azacyclopenta[*e*]acenaphthylene-7,9(1*H*,5*H*,8*H*)-dione (**13c**).

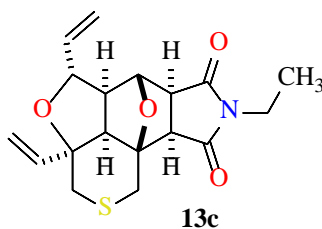

Column chromatography on silica gel (Hexane/EtOAc = 3/1) of the residue yielded **13c** as white crystals (0.016 g, 0.047 mmol, 15%).  $R_f$  0.79 (EtOAc : Hexane, 1:2, Sorbfil); m.p.: 214.9–219.3 °C (with decomp., from hexane/EtOAc = 3/1, SiO<sub>2</sub>). <sup>1</sup>H NMR (600.17 MHz, CDCl<sub>3</sub>)  $\delta$  6.15 (1H, dd,  $J = 10.6$  and  $J = 17.2$  Hz, H-1-Vinyl-3a), 5.96 (1H, ddd,  $J = 7.6$ ,  $J = 10.1$  and  $J = 17.2$  Hz, H-1-Vinyl-5), 5.37 (1H, br d,  $J = 1.0$  and  $J = 17.2$  Hz, H-2-Vinyl-5-*trans*), 5.31 (1H, d,  $J = 17.2$  Hz, H-2-Vinyl-3a-*trans*), 5.19 (1H, br d,  $J = 10.6$  Hz, H-2-Vinyl-5-*cis*), 5.18 (1H, br d,  $J = 10.6$  Hz, H-2-Vinyl-3a-*cis*), 4.71 (1H, s, H-6), 4.38 (1H, t,  $J = 6.6$  Hz, H-5), 3.55 (2H, q,  $J = 7.1$  Hz, N-CH<sub>2</sub>-CH<sub>3</sub>), 3.26 (1H, d,  $J = 14.6$  Hz, H-3A, -CH<sub>2</sub>-), 3.10 (1H, d,  $J = 14.6$  Hz, H-1A, -CH<sub>2</sub>-), 3.03 (1H, d,  $J = 7.1$  Hz, H-6a), 2.98 (1H,

br dd,  $J = 1.0$  and  $J = 14.1$  Hz, H-3B), 2.75 (1H, d,  $J = 7.1$  Hz, H-9a), 2.63 (1H, dd,  $J = 6.1$  and  $J = 8.1$  Hz, H-5a) 2.54 (1H, d,  $J = 13.6$  Hz, H-1B), 2.30 (1H, d,  $J = 8.1$  Hz, H-9c), 1.16 (3H, t,  $J = 7.1$  Hz, N-CH<sub>2</sub>-CH<sub>3</sub>). <sup>13</sup>C NMR (150.91 MHz, CDCl<sub>3</sub>)  $\delta$  176.0, 174.1, 142.5, 138.1, 117.4, 114.2, 84.8, 84.5, 82.6, 81.1, 56.8, 54.8, 53.1, 50.1, 34.2, 32.6, 26.3, 13.0. IR  $\nu_{\text{max}}/\text{cm}^{-1}$  (tablet KBr): 2976, 2930, 1769, 1692, 1444, 1406, 1352, 1224, 1146, 1056. HRMS (ESI-TOF): calcd. for C<sub>18</sub>H<sub>21</sub>NO<sub>6</sub>S [M + H]<sup>+</sup> 347.1191; found 347.1186.

(3*aSR*,5*RS*,5*aSR*,6*RS*,6*aSR*,9*aRS*,9*bSR*,9*cRS*)-2-Acetyl-3*a*,5-diethenyl-8-phenyloctahydro-1*H*-6,9*b*-epoxyfuro[2,3,4-*de*]pyrrolo[3,4-*h*]isoquinoline-7,9(5*H*,8*H*)-dione (**14a**).

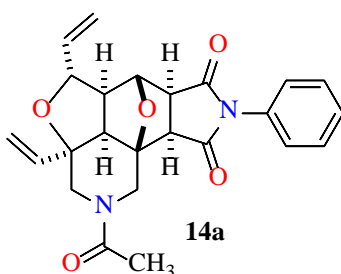

Column chromatography on silica gel (EtOAc) of the residue yielded **14a** as light-yellow oil (0.05 g, 0.11 mmol, 46%).  $R_f$  0.48 (EtOAc : Hexane, 1:3, Sorbfil). The mixture of amide rotamers in the ratio of 67/33, <sup>1</sup>H NMR (600.17 MHz, CDCl<sub>3</sub>, 22.8 °C)  $\delta$  7.50 (3H, m, H-3-5-Ph, **maj** + **min**), 7.27 (2H, m, H-2,6-Ph, **maj** + **min**), 5.96-5.92 (1H, m, H-1-Vinyl-3a, **maj** + **min**), 5.90-5.88 (1H, m, H-1-Vinyl-5, **maj** + **min**), 5.34-5.25 (2H, m, H-2-Vinyl-3a, **maj** + **min**), 5.21-5.14 (2H, m, H-2-Vinyl-5, **maj** + **min**), 4.81 (1H, s, H-6, **min**), 4.80 (1H, s, H-6, **maj**), 4.61 (1H, d,  $J = 15.1$  Hz, H-1A, **maj**), 4.36-4.31 (1H, m, H-5, **maj** + **min**), 4.10 (1H, d,  $J = 14.1$  Hz, H-1A, **min**), 3.98 (1H, d,  $J = 14.1$  Hz, H-1B, **min**), 3.93 (1H, d,  $J = 14.1$  Hz, H-3A, **min**), 3.80 (1H, d,  $J = 14.1$  Hz, H-3A, **maj**), 3.74 (1H, d,  $J = 15.1$  Hz, H-1B, **maj**), 3.53 (1H, d,  $J = 14.1$  Hz, H-3B, **min**), 3.26 (1H, d,  $J = 14.1$  Hz, H-3B, **maj**), 3.20 (1H, d,  $J = 7.1$  Hz, H-9c, **min**), 3.19 (1H, d,  $J = 7.1$  Hz, H-9c, **maj**), 3.07 (1H, d,  $J = 6.6$  Hz, H-9a, **min**), 3.04 (1H, d,  $J = 6.6$  Hz, H-9a, **maj**), 2.71-2.67 (1H, m, H-

5a, **maj** + **min**), 2.47 (1H, d,  $J = 6.6$  Hz, H-6a, **min**), 2.46 (1H, d,  $J = 6.6$  Hz, H-6a, **maj**), 2.11 (3H, s, MeCO, **maj** + **min**).  $^{13}\text{C}$  NMR (150.91 MHz,  $\text{CDCl}_3$ , 23.3 °C)  $\delta$  175.3, 175.2, 173.6, 173.1, 170.6, 170.4, 140.7, 138.0, 138.0, 131.5, 129.3, 129.2 (2C), 128.9, 126.5, 126.4, 117.3, 117.1, 115.4, 114.9, 85.5, 84.8, 84.7, 83.5, 82.0, 81.8, 56.7, 56.4, 54.0, 51.3, 51.2, 50.0, 49.6, 45.5, 44.1, 42.0 (2C), 21.8, 21.6. IR  $\nu_{\text{max}}/\text{cm}^{-1}$  (tablet KBr): 3064, 2982, 2922, 1777, 1710, 1643, 1424, 1386, 1264, 1192, 1090. HRMS (ESI-TOF): calcd. for  $\text{C}_{24}\text{H}_{24}\text{N}_2\text{O}_5$   $[\text{M} + \text{H}]^+$  420.1685; found 420.1693.

*tert*-Butyl (3*aSR*,5*RS*,5*aSR*,6*RS*,6*aSR*,9*aRS*,9*bSR*,9*cRS*)-3*a*,5-diethenyl-7,9-dioxo-8-phenyldecahydro-1*H*-6,9*b*-epoxyfuro[2,3,4-*de*]pyrrolo[3,4-*h*]isoquinoline-2(3*H*)-carboxylate (**14b**).

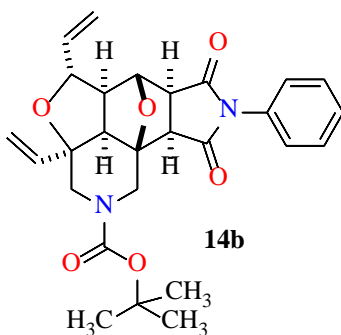

Column chromatography on silica gel (hexane/EtOAc = 4/1) of the residue yielded **14b** as light-yellow oil (0.04 g, 0.08 mmol, 36 %).  $R_f$  0.92 (EtOAc : Hexane, 1:2, Sorbfil). The mixture of amide rotamers in the ratio of 50/50,  $^1\text{H}$  NMR (600.17 MHz,  $\text{CDCl}_3$ , 22.6 °C)  $\delta$  7.48-7.39 (3H, m, H-3-5-Ph, **A** + **B**), 7.26-7.24 (2H, m, H-2,6-Ph, **A** + **B**), 5.99-5.89 (2H, m, H-1-Vinyl-3a, H-1-Vinyl-5, **A** + **B**), 5.33 (2H, br d,  $J = 17.2$  Hz, H-2-Vinyl-3a-*trans*, H-2-Vinyl-5-*trans*, **A** + **B**), 5.21 (1H, br d,  $J = 10.9$  Hz, H-2-Vinyl-3a-*cis*, **A** + **B**), 5.17 (1H, br d,  $J = 11.1$  Hz, H-2-Vinyl-5-*cis*, **A** + **B**), 4.80 (1H, s, H-6, **A** + **B**), 4.28 (1H, t,  $J = 6.1$  Hz, H-5, **A** + **B**), 4.08 (1H, br d,  $J = 15.1$  Hz, H-1A, **A**), 4.00 (2H, br d,  $J = 14.1$  Hz, H-1A and H-3A, **B**), 3.96 (1H, br d,  $J = 15.1$  Hz, H-3A, **A**), 3.69 (1H, br d,  $J = 13.1$  Hz,

H-1B, **A**), 3.59 (1H, br d,  $J = 13.1$  Hz, H-3B, **A**), 3.53 (2H, br d,  $J = 14.1$  Hz, H-1B and H-3B, **B**), 3.19 (1H, m, H-6a, **A + B**), 3.00 (1H, m, H-9a, **A + B**), 2.69 (1H, t,  $J = 7.1$  Hz, H-5a, **A + B**), 2.40 (1H, m, H-9c, **A + B**), 1.46 (9H, s, *-t*-Bu, **A + B**).  $^{13}\text{C}$  NMR (150.91 MHz,  $\text{CDCl}_3$ , 28.6 °C)  $\delta$  163.7, 163.6, 162.2, 162.0, 155.2, 155.1, 147.4, 146.5, 144.3, 143.3, 141.4, 141.1, 138.5, 138.0, 117.0, 116.8, 114.6, 114.2, 89.3, 88.7, 83.9, 83.5, 82.4, 82.0, 81.5, 80.3, 55.3, 54.6, 53.3, 53.0, 52.7, 52.5, 46.6, 46.1, 42.6, 41.7, 28.3. IR  $\nu_{\text{max}}/\text{cm}^{-1}$  (tablet KBr): 2978, 2928, 1778, 1713, 1598, 1500, 1454, 1386, 1255, 1193, 1155. HRMS (ESI-TOF): calcd. for  $\text{C}_{27}\text{H}_{30}\text{N}_2\text{O}_6$   $[\text{M} + \text{H}]^+$  478.5450; found 478.5444.

*Methyl (3aSR,5RS,5aSR,6RS,6aSR,9aRS,9bSR,9cRS)-3a,5-diethenyl-7,9-dioxo-8-phenyldecahydro-1H-6,9b-epoxyfuro[2,3,4-de]pyrrolo[3,4-h]isoquinoline-2(3H)-carboxylate (14c).*

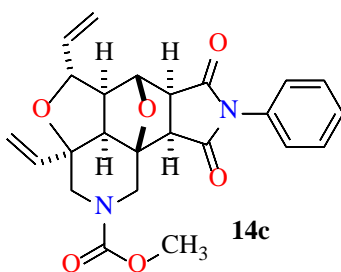

Column chromatography on silica gel (Hexane/EtOAc = 4/1) of the residue yielded **14c** as gray powder (0.062 g, 0.14 mmol, 58 %).  $R_f$  0.11 (EtOAc : hexane, 1:2, Sorbfil); m.p. = 165.6–171.2 °C (from Hexane/EtOAc = 4/1,  $\text{SiO}_2$ ). The mixture of amide rotamers in the ratio of 60/40,  $^1\text{H}$  NMR (600.17 MHz,  $\text{CDCl}_3$ , 22.4 °C)  $\delta$  7.50-7.41 (3H, m, H-3-5-Ph, **maj** + **min**), 7.27 (2H, m, H-2,6-Ph, **maj** + **min**), 5.93 (2H, ddd,  $J = 7.6$ ,  $J = 10.1$  and  $J = 17.2$  Hz, H-1-Vinyl-3a, H-1-Vinyl-5, **maj** + **min**), 5.35-5.17 (4H, m, H-2-Vinyl-3a-*trans*, H-2-Vinyl-5-*trans*, H-2-Vinyl-3a-*cis*, H-2-Vinyl-5-*cis*, **maj** + **min**), 4.82 (1H, br s, H-6, **maj** + **min**), 4.42 (1H, br d,  $J = 14.1$  Hz, H-1A, **maj**), 4.35 (1H, br t,  $J = 6.1$  Hz, H-5, **min**), 4.30 (1H, br t,  $J = 6.1$  Hz, H-5, **maj**), 4.09 (1H, br d,  $J = 15.1$  Hz, H-3A, **maj**), 3.96 (1H, br d,  $J = 15.1$  Hz, H-1B, **maj**), 3.89 (1H, br d,  $J = 13.1$  Hz, H-1A, **min**), 3.79 (1H, br d,  $J = 15.1$



Hz, H-3B, **maj**), 3.72 (3H, br s, CO<sub>2</sub>Me, **maj** + **min**), 3.66 (1H, br d,  $J = 13.1$  Hz, H-3A, **min**), 3.62 (1H, br d,  $J = 13.1$  Hz, H-1B, **min**), 3.29 (1H, br d,  $J = 13.1$  Hz, H-3B, **min**), 3.21 (1H, d,  $J = 7.1$  Hz, H-6a, **maj** + **min**), 3.00 (1H, d,  $J = 7.1$  Hz, H-9a, **maj** + **min**), 2.70 (1H, dd,  $J = 6.0$  and  $J = 8.1$  Hz, H-5a, **maj** + **min**), 2.42 (1H, d,  $J = 8.1$  Hz, H-9c, **maj** + **min**). <sup>13</sup>C NMR (150.91 MHz, CDCl<sub>3</sub>)  $\delta$  175.3, 175.2, 173.3, 173.1, 156.4, 141.0, 140.3, 138.1, 137.4, 131.4, 129.3, 129.0, 126.5, 126.4, 117.5, 117.3, 114.9, 114.6, 85.4, 85.2, 84.6, 84.3, 83.1, 83.0, 81.9, 81.4, 57.0, 56.5, 54.4, 53.9, 53.0, 51.3, 51.2, 49.6, 47.2, 45.3, 43.5, 43.0. IR  $\nu_{\text{max}}/\text{cm}^{-1}$  (tablet KBr): 2956, 1778, 1710, 1598, 1501, 1468, 1385, 1265, 1194. HRMS (ESI-TOF): calcd. for C<sub>24</sub>H<sub>24</sub>N<sub>2</sub>O<sub>6</sub> [M + H]<sup>+</sup> 436.1634; found 436.1639.

(3*aSR*,5*RS*,5*aSR*,6*RS*,6*aSR*,9*aRS*,9*bSR*,9*cRS*)-3*a*,5-Diethenyl-8-phenyl-2-(trifluoroacetyl)octahydro-1*H*-6,9*b*-epoxyfuro[2,3,4-*de*]pyrrolo[3,4-*h*]isoquinoline-7,9(5*H*,8*H*)-dione (**14d**).

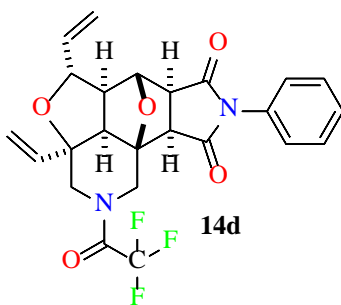

Column chromatography on silica gel (hexane/EtOAc = 4/1) of the residue yielded **14d** as grey powder crystals (0.05 g, 0.11 mmol, 47%).  $R_f$  0.70 (EtOAc : Hexane, 1:2, Sorbfil); mp: 123.7–143.9 °C (from Hexane/EtOAc = 4/1, SiO<sub>2</sub>). The mixture of amide rotamers in the ratio of 66/34, <sup>1</sup>H NMR (600.17 MHz, CDCl<sub>3</sub>, 22.9 °C)  $\delta$  7.51 (2H, m, H-3,5-Ph, **maj** + **min**), 7.44 (1H, m, H-4-Ph, **maj** + **min**), 7.27 (2H, m, H-2,6, **maj** + **min**), 5.97 (1H, dd,  $J = 11.1$  and  $J = 17.2$  Hz, H-1-Vinyl-3a, **maj** + **min**), 5.92 (1H, ddd,  $J = 2.0$ ,  $J = 9.1$  and  $J = 17.2$  Hz, H-1-Vinyl-5, **maj** + **min**), 5.36 (4H, m, H-2-Vinyl-3a and H-2-Vinyl-5, **maj** + **min**), 4.84 (1H, br s, H-6, **maj** + **min**), 4.37 (1H, d, H-1A, **min**), 4.35 (1H, d, H-1A, **maj**),

4.36-4.29 (1H, m, H-5, **maj** + **min**), 4.14 (1H, d,  $J = 14.1$  Hz, H-3A, **min**), 4.10 (1H, d,  $J = 14.1$  Hz, H-3B, **min**), 3.97 (1H, d,  $J = 14.1$  Hz, H-3A, **maj**), 3.87 (1H, d,  $J = 14.1$  Hz, H-3B, **maj**), 3.49 (1H, d,  $J = 14.1$  Hz, H-1B, **min**), 3.47 (1H, d,  $J = 14.1$  Hz, H-1B, **maj**), 3.25 (1H, d,  $J = 9.1$  Hz, H-9a, **min**), 3.24 (1H, d,  $J = 9.1$  Hz, H-6a, **maj**), 3.11 (1H, d,  $J = 9.1$  Hz, H-9a, **min**), 3.10 (1H, d,  $J = 9.1$  Hz, H-6a, **maj**), 2.75 (1H, m, H-5a, **maj** + **min**), 2.54 (1H, d,  $J = 8.1$  Hz, H-9c, **min**), 2.53 (1H, d,  $J = 8.1$  Hz, H-9c, **maj**).  $^{13}\text{C}$  NMR ( $\text{CDCl}_3$ , 150.91 MHz, 23.7 °C)  $\delta$  175.2, 175.1, 173.3, 173.0, 157.09 (q,  $^2J_{\text{C,F}} = 36.1$  Hz,  $\text{COCF}_3$ ), 157.12 (q,  $^2J_{\text{C,F}} = 36.1$  Hz,  $\text{COCF}_3$ ), 140.2, 138.3, 137.9, 137.1, 131.4, 129.5, 129.4 (2C, **maj** + **min**), 129.2, 128.7, 126.4 (2C), 126.5 (2C), 117.9, 117.5, 116.4 (q,  $^1J_{\text{C,F}} = 258.7$  Hz,  $\text{CF}_3$ ), 116.2 (q,  $^1J_{\text{C,F}} = 258.7$  Hz,  $\text{CF}_3$ ), 115.8, 115.5, 85.4, 84.7, 84.4, 84.1, 82.9, 82.7, 82.3, 81.8, 57.0, 56.5, 54.0, 53.7, 51.4, 51.2, 49.6, 49.5, 47.5-46.3 (q,  $^5J_{\text{C,F}} = 2.9$  Hz, C-1, **maj** + **min**), 44.6-43.5 (q,  $^5J_{\text{C,F}} = 2.9$  Hz, C-3, **maj** + **min**).  $^{19}\text{F}$  NMR (564.7 MHz,  $\text{CDCl}_3$ )  $\delta$  -68.00 (3F, s,  $\text{CF}_3$ , **maj**), -68.89 (3F, s,  $\text{CF}_3$ , **min**). IR  $\nu_{\text{max}}/\text{cm}^{-1}$  (tablet KBr): 3079, 2960, 2928, 1779, 1709, 1500, 1454, 1389, 1196, 1149. HRMS (ESI-TOF): calcd. for  $\text{C}_{24}\text{H}_{21}\text{F}_3\text{N}_2\text{O}_5$   $[\text{M} + \text{H}]^+$  474.1403; found 474.1417.

(3*a*SR,5*RS*,5*a*SR,6*RS*,6*a*SR,9*a*RS,9*b*SR,9*c*RS)-3*a*,5-Diethenyl-8-phenyl-2-(trichloroacetyl)octahydro-1*H*-6,9*b*-epoxyfuro[2,3,4-*de*]pyrrolo[3,4-*h*]isoquinoline-7,9(5*H*,8*H*)-dione (**14e**).

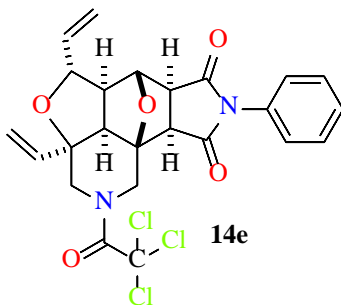

Column chromatography on silica gel (hexane/EtOAc = 2/1) of the residue yielded **14e** as grey powder (0.043 g, 0.083 mmol, 41%).  $R_f$  0.43 (EtOAc : Hexane, 1:2, Sorbfil); mp:

203.5–205.7 °C (with decomp., from Hexane/EtOAc = 2/1, SiO<sub>2</sub>). Very broad signals in NMR spectrums. <sup>1</sup>H NMR (600.17 MHz, CDCl<sub>3</sub>) δ 7.48 (2H, t, *J* = 7.6 Hz, H-3,5-Ph), 7.42 (1H, br t, *J* = 7.6 Hz, H-4-Ph), 7.25 (2H, br d, *J* = 7.6 Hz, H-2,6-Ph), 6.06–5.97 (1H, m, H-1-Vinyl-3a), 5.93 (1H, ddd, *J* = 7.6, *J* = 10.1 and *J* = 17.2 Hz, H-1-Vinyl-5), 5.35 (2H, d, *J* = 17.2 Hz, H-2-Vinyl-*trans*), 5.23–5.19 (2H, m, H-2-Vinyl-*cis*), 4.85 (1H, s, H-6), 4.61 (1H, br m, H-3A), 4.31 (1H, m, H-5), 4.09–3.93 (3H, br m, H-3B and H-1), 3.25 (1H, d, *J* = 7.1 Hz, H-6a), 3.10 (1H, m, H-9a), 2.74 (1H, br dd, *J* = 7.1 and *J* = 8.6 Hz, H-5a), 2.52 (1H, d, *J* = 8.6 Hz, H-9c). <sup>13</sup>C NMR (CDCl<sub>3</sub>, 150.91 MHz) δ 175.1, 172.7, 171.2, 138.9, 136.6, 131.3, 129.3, 129.1, 126.4, 117.9, 114.5, 85.0, 83.9, 83.1, 81.5, 57.2, 54.3, 51.4, 49.6, 48.8, 45.1. IR ν<sub>max</sub>/cm<sup>-1</sup> (tablet KBr): 2987, 2928, 1775, 1707, 1447, 1383, 1189. HRMS (ESI-TOF): calcd. for C<sub>24</sub>H<sub>21</sub>Cl<sub>3</sub>N<sub>2</sub>O<sub>5</sub> [M + H]<sup>+</sup> 522.0516; found 522.0520.

(3*aSR*,5*RS*,5*aSR*,6*RS*,6*aSR*,9*aRS*,9*bSR*,9*cRS*)-3*a*,5-Diethenyl-8-phenylhexahydro-3*H*-6,9*b*-epoxy-2,4-dioxa-8-azacyclopenta[*e*]acenaphthylene-7,9(1*H*,5*H*,8*H*)-dione (**14f**).

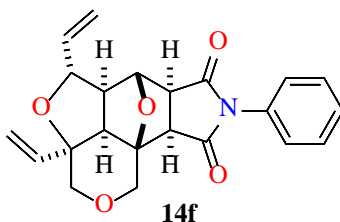

Column chromatography on silica gel (hexane/EtOAc = 3/1) of the residue yielded **14f** as white powder (0.07 g, 0.18 mmol, 64 %). *R<sub>f</sub>* 0.59 (EtOAc : Hexane, 1:1, Sorbfil); mp: 236.6–243 °C (with decomp., from Hexane/EtOAc = 3/1, SiO<sub>2</sub>). <sup>1</sup>H NMR (600.17 MHz, CDCl<sub>3</sub>, 23.0 °C) δ 7.49 (2H, t, *J* = 7.6 Hz, H-3,5-Ph), 7.42 (1H, br t, *J* = 7.6 Hz, H-4-Ph), 7.26 (2H, br t, *J* = 7.6 Hz, H-2,6-Ph), 5.98 (1H, ddd, *J* = 8.1, *J* = 10.1 and *J* = 17.2 Hz, H-1-Vinyl-5), 5.88 (1H, dd, *J* = 10.6 and *J* = 17.2 Hz, H-1-Vinyl-3a), 5.37 (1H, d, *J* = 17.2 Hz, H-2-Vinyl-3a-*trans*), 5.23 (2H, m, H-2-Vinyl), 5.13 (1H, d, *J* = 10.1 Hz, H-2-Vinyl-5-*cis*), 4.87 (1H, s, H-6), 4.52 (1H, dd, *J* = 4.0 and *J* = 8.1 Hz, H-5), 4.41 (1H, d, *J* = 13.6

Hz, H-3A), 4.08 (1H, d,  $J = 13.6$  Hz, H-3B), 3.95 (1H, d,  $J = 12.6$  Hz, H-1A), 3.35 (1H, d,  $J = 12.6$  Hz, H-1B), 3.23 (1H, d,  $J = 7.1$  Hz, H-6a), 3.00 (1H, d,  $J = 7.1$  Hz, H-9a), 2.74 (1H, dd,  $J = 4.0$  and  $J = 7.6$  Hz, H-5a), 2.44 (1H, d,  $J = 7.6$  Hz, H-9c).  $^{13}\text{C}$  NMR (150.91 MHz,  $\text{CDCl}_3$ , 24.4 °C)  $\delta$  176.3, 174.3, 142.0, 140.5, 132.0, 128.9, 128.4, 126.8, 115.2, 115.1, 85.6, 82.3, 81.9, 69.9, 65.3, 54.4, 50.5, 50.0, 49.0. IR  $\nu_{\text{max}}/\text{cm}^{-1}$  (tablet KBr): 3066, 2983, 1777, 1713, 1499, 1390, 1197. HRMS (ESI-TOF): calcd. for  $\text{C}_{22}\text{H}_{21}\text{NO}_5$   $[\text{M} + \text{H}]^+$  379.1420; found 379.1434.

(3*aSR*,5*RS*,5*aSR*,6*RS*,6*aSR*,9*aRS*,9*bSR*,9*cRS*)-3*a*,5-Diethenyl-8-phenylhexahydro-3*H*-6,9*b*-epoxy-4-oxa-2-thia-8-azacyclopenta[*e*]acenaphthylene-7,9(1*H*,5*H*,8*H*)-dione (**14g**).

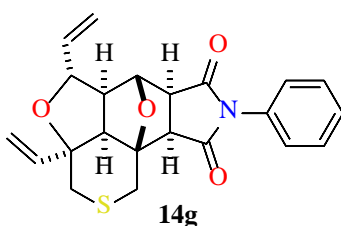

Column chromatography on silica gel (hexane/EtOAc = 1/1) of the residue yielded **14g** as white powder (0.05 g, 0.13 mmol, 48 %).  $R_f$  0.67 (EtOAc : Hexane, 1:1, Sorbfil); mp: 241.3–245.5 °C (with decomp., Hexane/EtOAc = 1/1,  $\text{SiO}_2$ ).  $^1\text{H}$  NMR (600.17 MHz,  $\text{CDCl}_3$ )  $\delta$  7.49–7.47 (2H, m, H-3,5-Ph), 7.43–7.40 (1H, m, H-4-Ph), 7.25–7.23 (2H, m, H-2,6-Ph), 6.17 (1H, dd,  $J = 10.6$  and  $J = 17.2$  Hz, H-1-Vinyl-3a), 5.95 (1H, ddd,  $J = 7.6$ ,  $J = 10.1$  and  $J = 17.7$  Hz, H-1-Vinyl-5), 5.39 (1H, br dd,  $J = 1.0$  and  $J = 17.7$  Hz, H-2-Vinyl-3a-*trans*), 5.33 (1H, br dd,  $J = 1.0$  and  $J = 17.2$  Hz, H-2-Vinyl-5-*trans*), 5.21–5.19 (1H, br dd,  $J = 1.0$  and  $J = 10.1$  Hz, H-2-Vinyl-3a-*cis*), 5.20–5.18 (1H, br dd,  $J = 1.0$  and  $J = 10.6$  Hz, H-2-Vinyl-5-*cis*), 4.85 (1H, s, H-6), 4.43 (1H, t,  $J = 7.1$  Hz, H-5), 3.31 (1H, d,  $J = 14.6$  Hz, H-3A), 3.23 (1H, d,  $J = 7.1$  Hz, H-6a), 3.18 (1H, br d,  $J = 15.1$  Hz, H-3B), 3.01 (1H, dd,  $J = 1.0$  and  $J = 14.1$  Hz, H-1A), 2.94 (1H, d,  $J = 7.1$  Hz, H-9a), 2.70 (1H, dd,  $J = 6.6$  and  $J = 8.1$  Hz, H-5a), 2.57 (1H, d,  $J = 13.2$  Hz, H-1B), 2.36 (1H, d,  $J = 8.1$  Hz, H-9c).  $^{13}\text{C}$

NMR (150.91 MHz, CDCl<sub>3</sub>)  $\delta$  175.4, 173.4, 142.5, 138.0, 131.4, 129.3 (2C), 129.0, 126.5 (2C), 117.5, 114.3, 84.9, 84.8, 82.6, 81.6, 56.8, 54.9, 53.2, 50.2, 32.7, 26.4. IR  $\nu_{\text{max}}/\text{cm}^{-1}$  (tablet KBr): 2993, 2936, 1775, 1713, 1486, 1381, 1265, 1190. HRMS (ESI-TOF): calcd. for C<sub>22</sub>H<sub>21</sub>NO<sub>4</sub>S [M + H]<sup>+</sup> 395.1191; found 395.1195.

(3*aSR*,5*RS*,5*aSR*,6*RS*,6*aSR*,9*aRS*,9*bSR*,9*cRS*)-3*a*,5-Diethenyl-8-phenylhexahydro-3*H*-6,9*b*-epoxy-4-oxa-2-thia-8-azacyclopenta[*e*]acenaphthylene-7,9(1*H*,5*H*,8*H*)-dione 2,2-dioxide (**14h**).

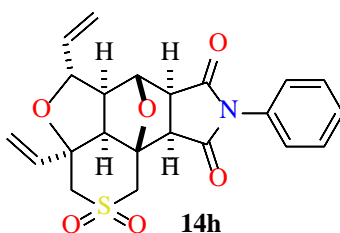

Column chromatography on silica gel (EtOAc) of the residue yielded **14h** as white powder (0.064 g, 0.15 mmol, 60 %).  $R_f$  0.15 (EtOAc : hexane, 1:2, Sorbfil); mp: 248.3–257.4 °C (from EtOAc, SiO<sub>2</sub>). <sup>1</sup>H NMR (600.2 MHz, CDCl<sub>3</sub>)  $\delta$  7.49 (2H, br t, H-3,5-Ph), 7.43 (1H, br t,  $J = 7.6$  Hz, H-4-Ph), 7.25 (2H, br t,  $J = 7.6$  Hz, H-2,6-Ph), 6.37 (1H, dd,  $J = 10.6$  and  $J = 17.2$  Hz, H-1-Vinyl-3*a*), 5.94 (1H, ddd,  $J = 7.6$ ,  $J = 10.6$  and  $J = 17.7$  Hz, H-1-Vinyl-5), 5.55 (1H, br dd,  $J = 1.0$  and  $J = 17.2$  Hz, H-2-Vinyl-3*a-trans*), 5.44 (1H, br d,  $J = 17.2$  Hz, H-2-Vinyl-5-*trans*), 5.32 (1H, br d,  $J = 10.6$  Hz, H-2-Vinyl-3*a-cis*), 5.28 (1H, br d,  $J = 10.6$  Hz, H-2-Vinyl-5-*cis*), 4.93 (1H, s, H-6), 4.28 (1H, t,  $J = 7.6$  Hz, H-5), 3.93 (1H, d,  $J = 15.6$  Hz, H-3A), 3.84 (1H, d,  $J = 15.6$  Hz, H-3B), 3.65 (1H, d,  $J = 14.1$  Hz, H-1A), 3.24-3.23 (1H, d,  $J = 7.1$  Hz, H-6*a*), 3.24-3.21 (1H, d,  $J = 14.1$  Hz, H-1B), 3.10 (1H, d,  $J = 7.1$  Hz, H-9*a*), 2.78 (1H, br t,  $J = 8.1$  Hz, H-5*a*), 2.67 (1H, d,  $J = 9.1$  Hz, H-9*c*). <sup>13</sup>C NMR (150.91 MHz, CDCl<sub>3</sub>)  $\delta$  172.5, 171.2, 138.9, 135.5, 131.1, 129.4 (2C), 129.3, 126.3 (2C), 118.9, 115.2, 85.4, 83.4, 83.2, 81.1, 57.4, 56.1, 54.8, 52.7, 52.5, 49.6. IR  $\nu_{\text{max}}/\text{cm}^{-1}$  (tablet

KBr): 2991, 2941, 1778, 1709, 1499, 1386, 1270, 1192. HRMS (ESI-TOF): calcd. for  $C_{22}H_{21}NO_6S$   $[M + H]^+$  427.1090; found 427.1084.

### 3. Copies of NMR spectra

|                                                                |                    |
|----------------------------------------------------------------|--------------------|
| <b>Formula</b> C <sub>16</sub> H <sub>15</sub> NO <sub>6</sub> | <b>FW</b> 317.2934 |
|----------------------------------------------------------------|--------------------|

|                                                               |                                    |                                       |                                        |
|---------------------------------------------------------------|------------------------------------|---------------------------------------|----------------------------------------|
| <b>Acquisition Time (sec)</b> 1.9818                          | <b>Comment</b> single_pulse        | <b>Date</b> 02 Feb 1990 15:50:52      | <b>Date Stamp</b> 21 Nov 2018 11:39:32 |
| <b>File Name</b> C:\Users\Fedor\Desktop\20.11.18\FZ6983-1.jdf | <b>Frequency (MHz)</b> 600.17      | <b>Nucleus</b> 1H                     | <b>Number of Transients</b> 8          |
| <b>Origin</b> ECA 600                                         | <b>Original Points Count</b> 32768 | <b>Owner</b> delta                    | <b>Pulse Sequence</b> single_pulse.ex2 |
| <b>Receiver Gain</b> 34.00                                    | <b>Solvent</b> DMSO-d6             | <b>Spectrum Offset (Hz)</b> 5401.5503 | <b>Sweep Width (Hz)</b> 16534.39       |

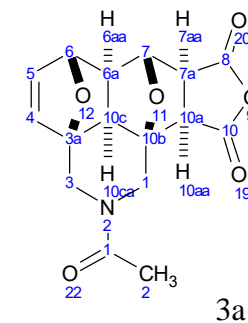

FZ6983-1.ESP

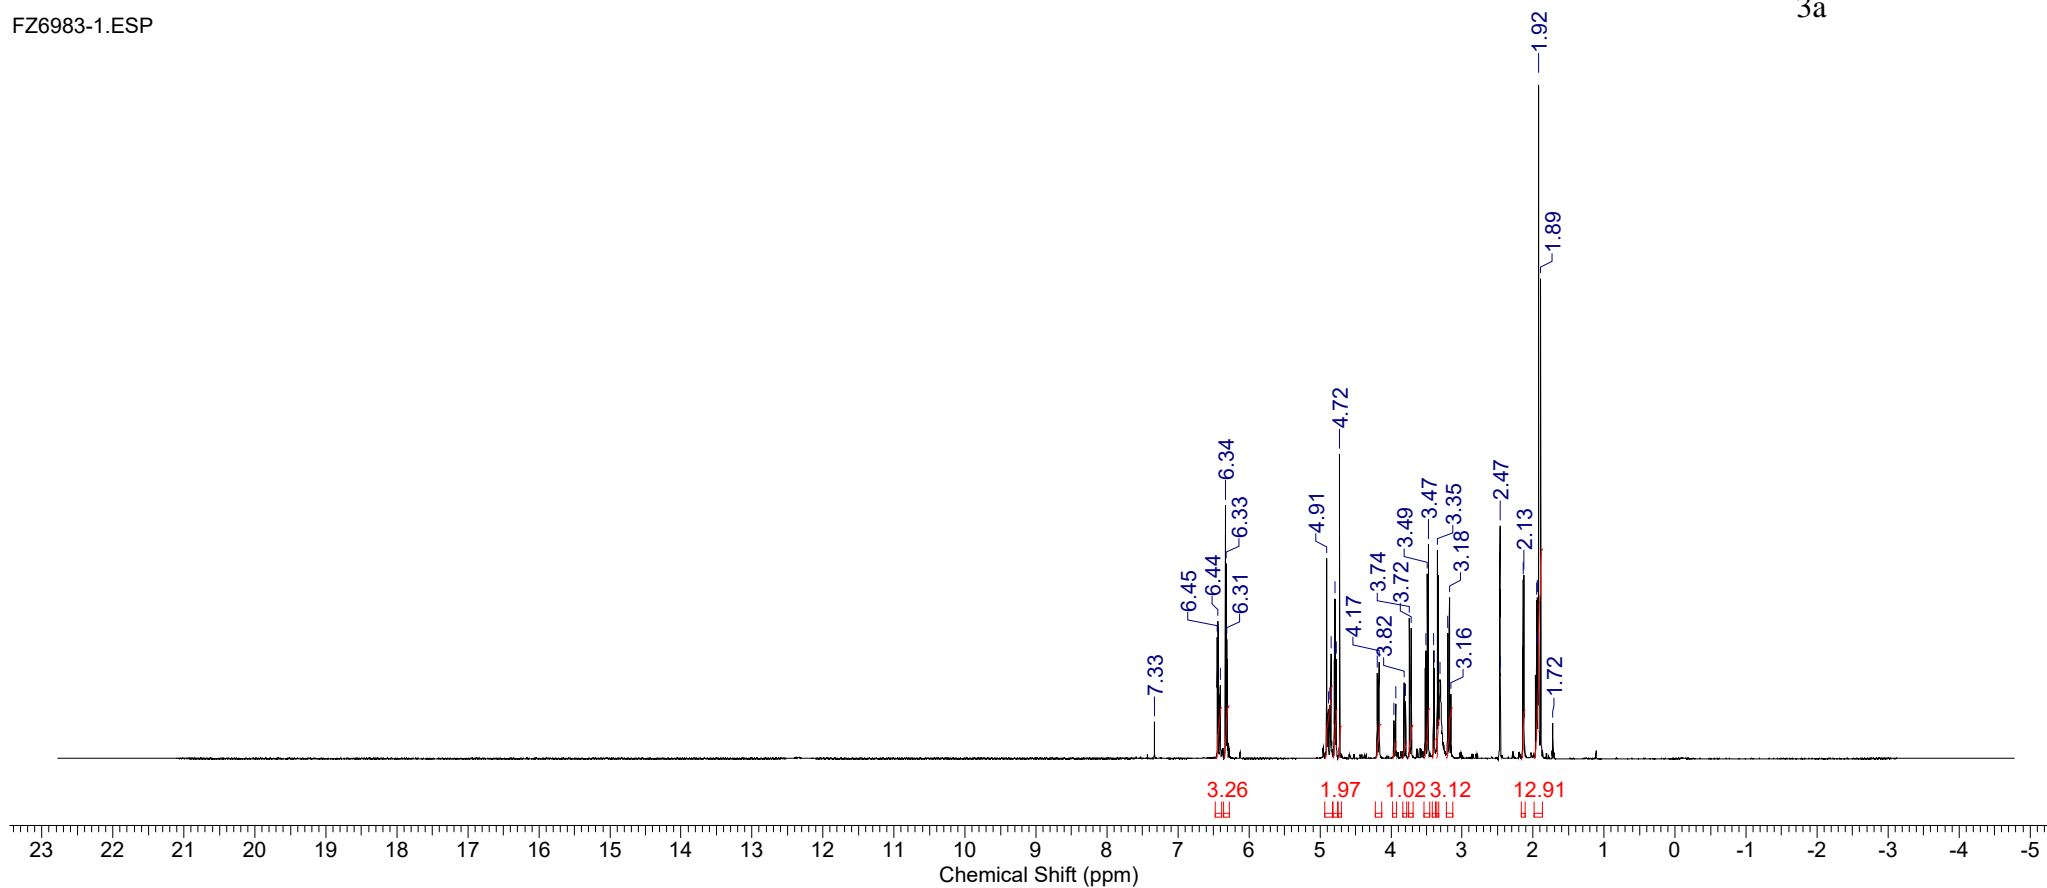



|                                                                |                    |
|----------------------------------------------------------------|--------------------|
| <b>Formula</b> C <sub>16</sub> H <sub>15</sub> NO <sub>6</sub> | <b>FW</b> 317.2934 |
|----------------------------------------------------------------|--------------------|

|                                                               |                                    |                                        |                                        |
|---------------------------------------------------------------|------------------------------------|----------------------------------------|----------------------------------------|
| <b>Acquisition Time (sec)</b> 1.9818                          | <b>Comment</b> single_pulse        | <b>Date</b> 02 Feb 1990 15:50:52       | <b>Date Stamp</b> 21 Nov 2018 11:39:32 |
| <b>File Name</b> C:\Users\Fedor\Desktop\20.11.18\FZ6983-1.jdf | <b>Frequency (MHz)</b> 600.17      | <b>Nucleus</b> 1H                      | <b>Number of Transients</b> 8          |
| <b>Origin</b> ECA 600                                         | <b>Original Points Count</b> 32768 | <b>Owner</b> delta                     | <b>Points Count</b> 32768              |
| <b>Receiver Gain</b> 34.00                                    | <b>Solvent</b> DMSO-d6             | <b>Spectrum Offset (Hz)</b> 5401.5503  | <b>Sweep Width (Hz)</b> 16534.39       |
|                                                               |                                    | <b>Pulse Sequence</b> single_pulse.ex2 |                                        |

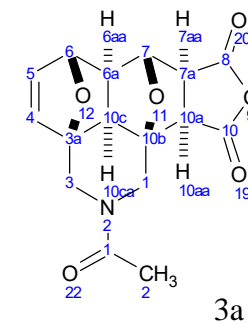

FZ6983-1.ESP

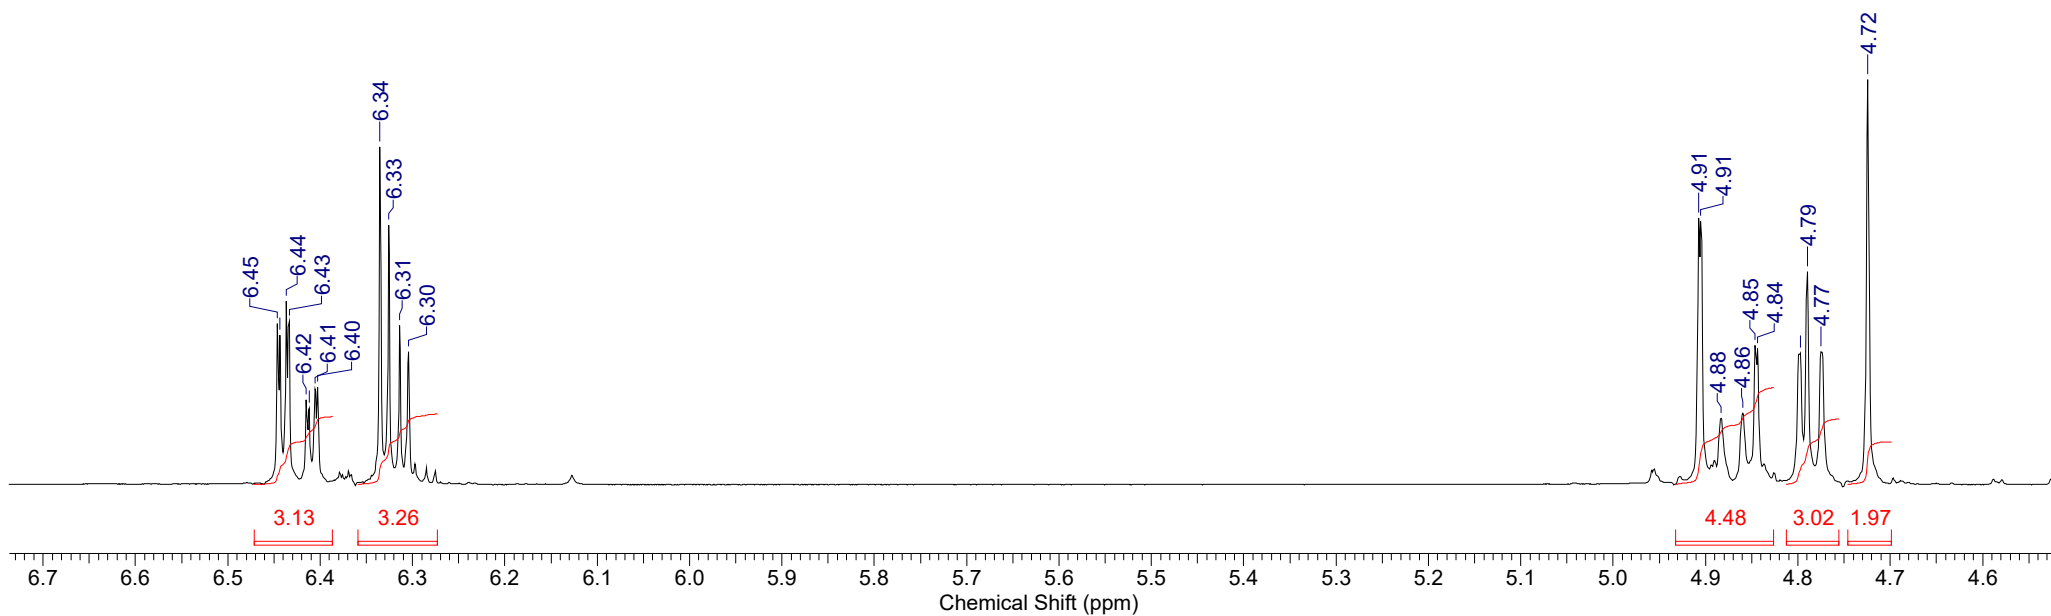

|                                                                |                    |
|----------------------------------------------------------------|--------------------|
| <b>Formula</b> C <sub>16</sub> H <sub>15</sub> NO <sub>6</sub> | <b>FW</b> 317.2934 |
|----------------------------------------------------------------|--------------------|

|                                                               |                                    |                                       |                                        |
|---------------------------------------------------------------|------------------------------------|---------------------------------------|----------------------------------------|
| <b>Acquisition Time (sec)</b> 1.9818                          | <b>Comment</b> single pulse        | <b>Date</b> 02 Feb 1990 15:50:52      | <b>Date Stamp</b> 21 Nov 2018 11:39:32 |
| <b>File Name</b> C:\Users\Fedor\Desktop\20.11.18\FZ6983-1.jdf | <b>Frequency (MHz)</b> 600.17      | <b>Nucleus</b> 1H                     | <b>Number of Transients</b> 8          |
| <b>Origin</b> ECA 600                                         | <b>Original Points Count</b> 32768 | <b>Owner</b> delta                    | <b>Pulse Sequence</b> single_pulse.ex2 |
| <b>Receiver Gain</b> 34.00                                    | <b>Solvent</b> DMSO-d6             | <b>Spectrum Offset (Hz)</b> 5401.5503 | <b>Sweep Width (Hz)</b> 16534.39       |

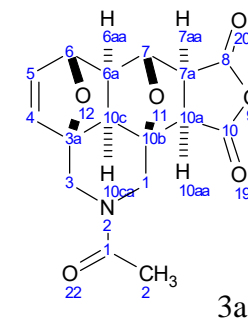

FZ6983-1.ESP

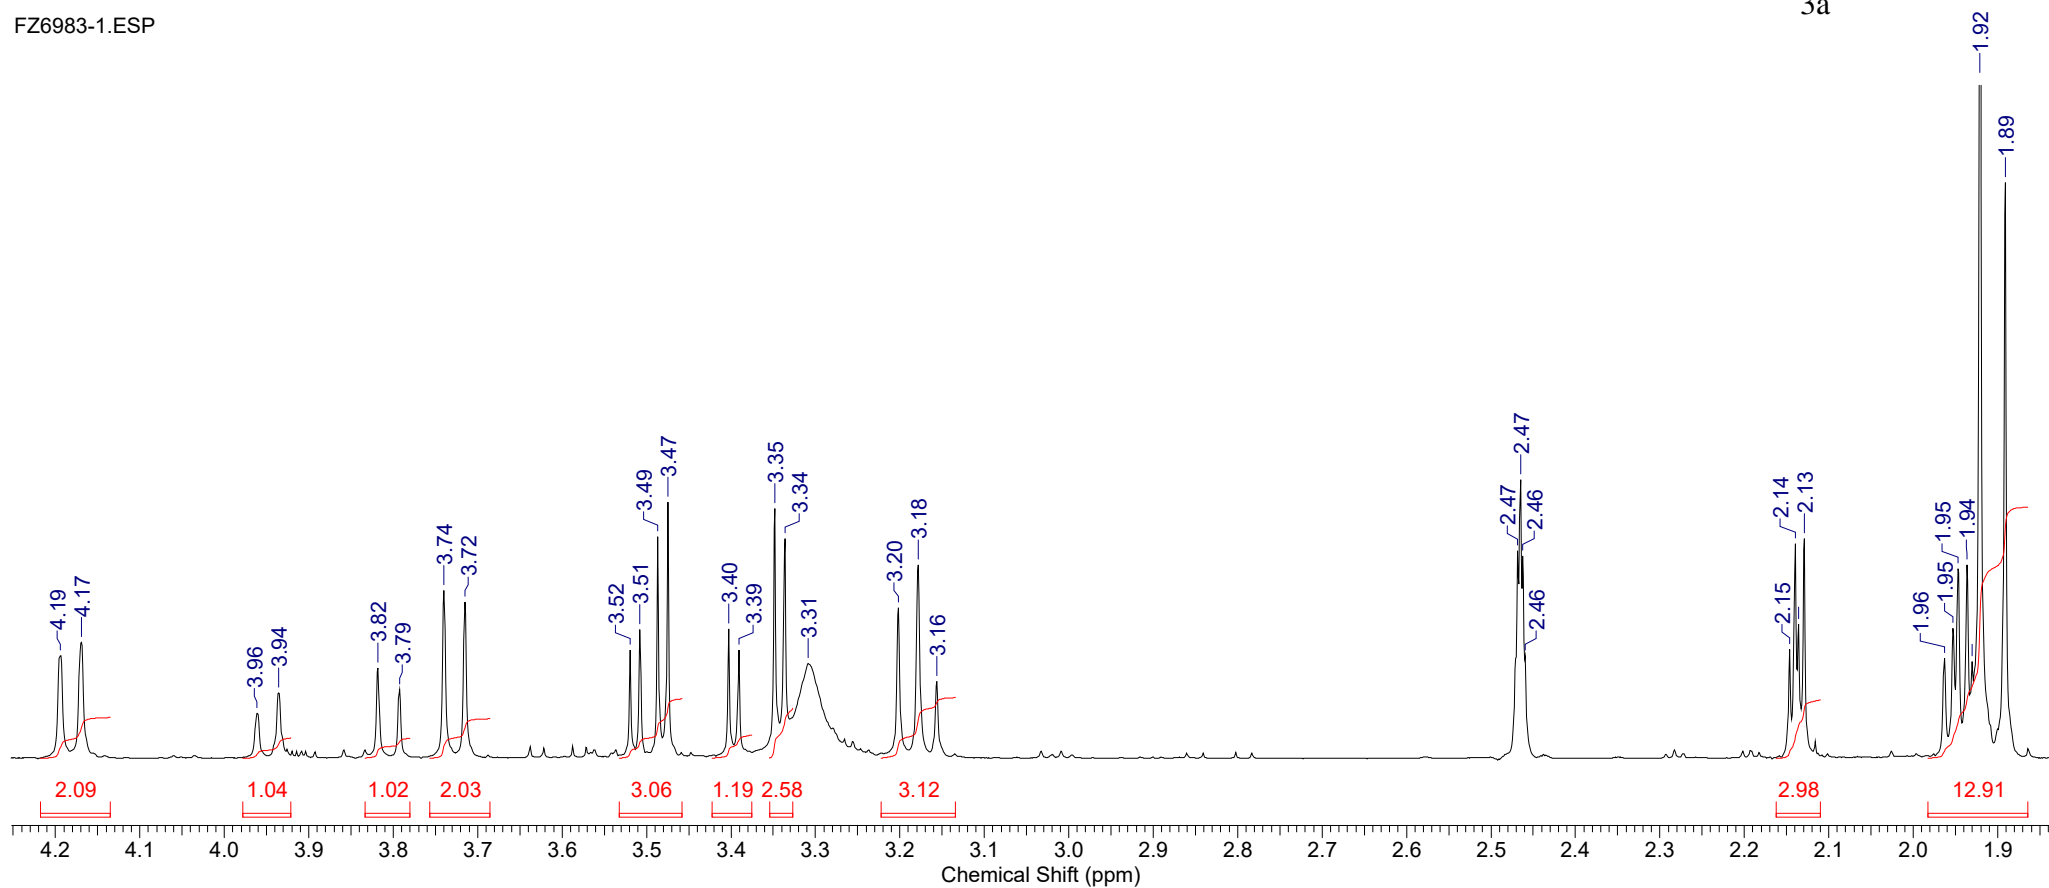

|                                                                |                    |
|----------------------------------------------------------------|--------------------|
| <b>Formula</b> C <sub>16</sub> H <sub>15</sub> NO <sub>6</sub> | <b>FW</b> 317.2934 |
|----------------------------------------------------------------|--------------------|

|                                        |                                                 |                                    |
|----------------------------------------|-------------------------------------------------|------------------------------------|
| <b>Acquisition Time (sec)</b> 0.6921   | <b>Comment</b> single pulse decoupled gated NOE | <b>Date</b> 11 Jan 1990 03:20:08   |
| <b>Date Stamp</b> 13 Dec 2018 17:15:47 | <b>File Name</b> E:\ЯМР для Лизы\FZ7055-1.JDF   | <b>Frequency (MHz)</b> 150.91      |
| <b>Nucleus</b> 13C                     | <b>Number of Transients</b> 1000                | <b>Origin</b> ECA 600              |
| <b>Points Count</b> 32768              | <b>Pulse Sequence</b> single pulse dec          | <b>Original Points Count</b> 32768 |
| <b>Spectrum Offset (Hz)</b> 15091.3428 | <b>Sweep Width (Hz)</b> 47348.49                | <b>Receiver Gain</b> 56.00         |
|                                        |                                                 | <b>Owner</b> delta                 |
|                                        |                                                 | <b>Solvent</b> DMSO-d6             |

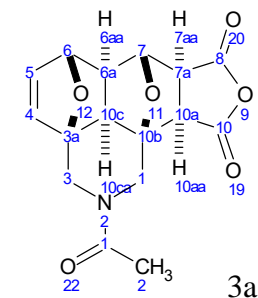

FZ7055-1.ESP

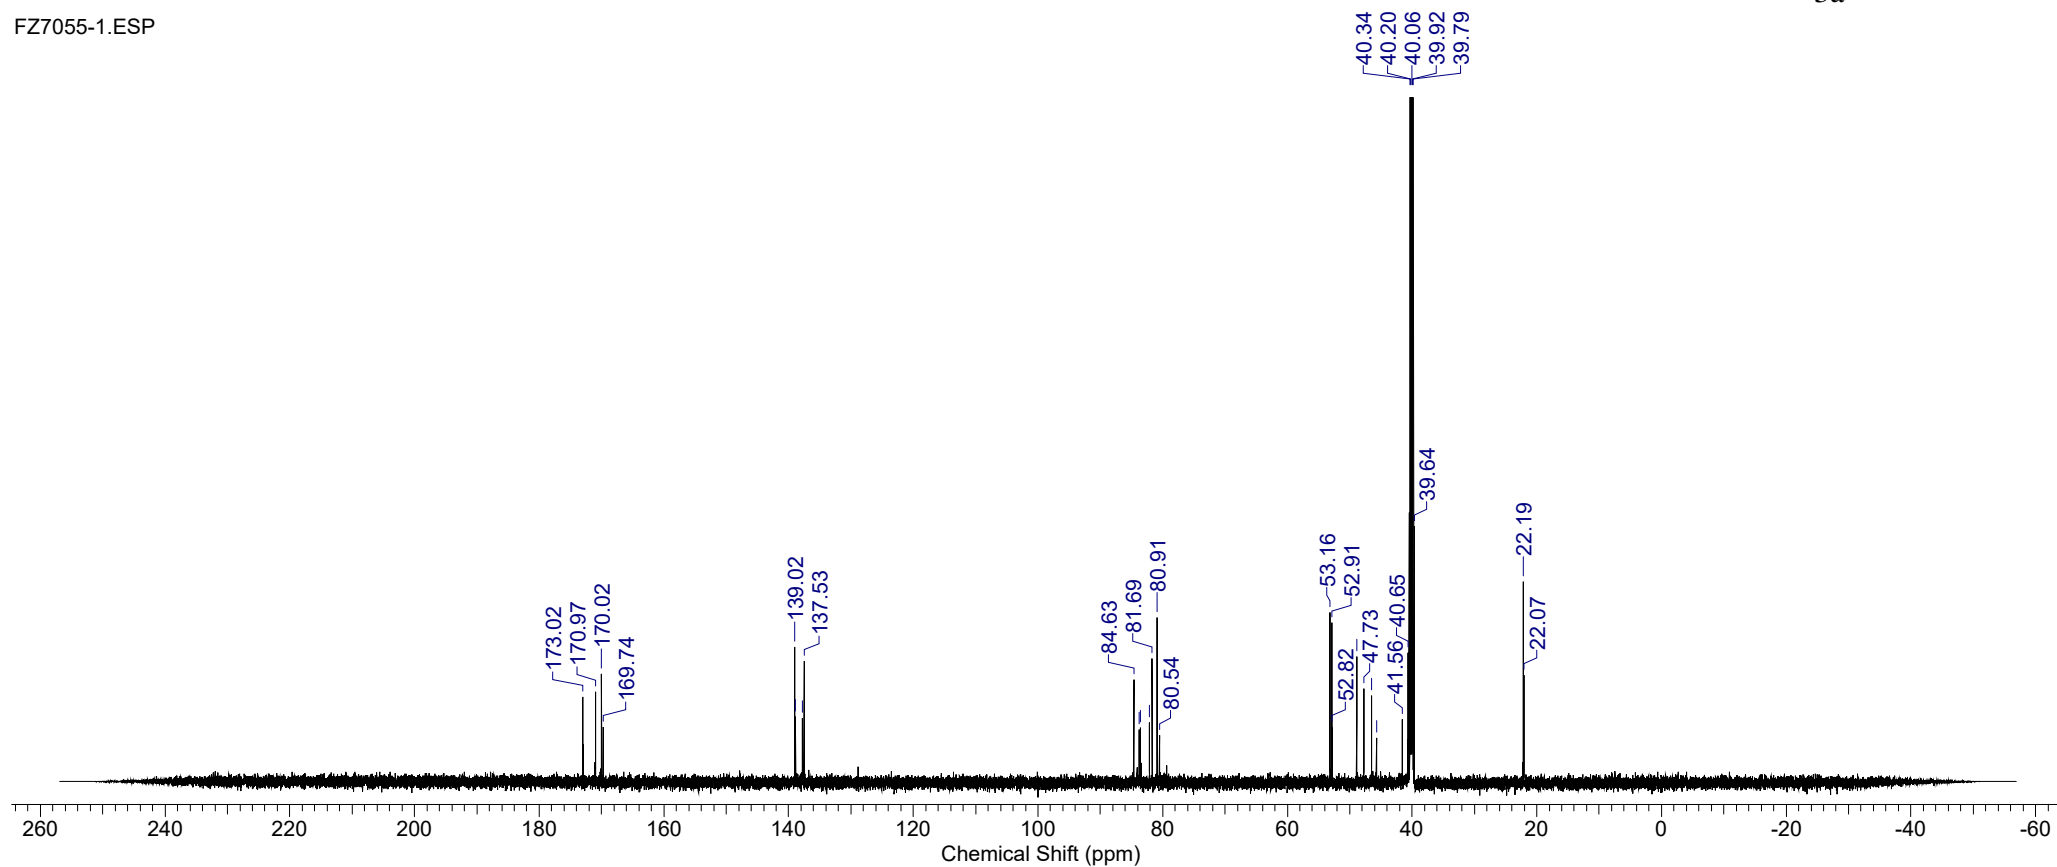

|                                                                |                    |
|----------------------------------------------------------------|--------------------|
| <b>Formula</b> C <sub>16</sub> H <sub>15</sub> NO <sub>6</sub> | <b>FW</b> 317.2934 |
|----------------------------------------------------------------|--------------------|

|                                        |                                                 |                                    |
|----------------------------------------|-------------------------------------------------|------------------------------------|
| <b>Acquisition Time (sec)</b> 0.6921   | <b>Comment</b> single pulse decoupled gated NOE | <b>Date</b> 11 Jan 1990 03:20:08   |
| <b>Date Stamp</b> 13 Dec 2018 17:15:47 | <b>File Name</b> E:\ЯМР для Лизы\FZ7055-1.JDF   | <b>Frequency (MHz)</b> 150.91      |
| <b>Nucleus</b> 13C                     | <b>Number of Transients</b> 1000                | <b>Origin</b> ECA 600              |
| <b>Points Count</b> 32768              | <b>Pulse Sequence</b> single pulse dec          | <b>Original Points Count</b> 32768 |
| <b>Spectrum Offset (Hz)</b> 15091.3428 | <b>Sweep Width (Hz)</b> 47348.49                | <b>Receiver Gain</b> 56.00         |
|                                        |                                                 | <b>Owner</b> delta                 |
|                                        |                                                 | <b>Solvent</b> DMSO-d6             |

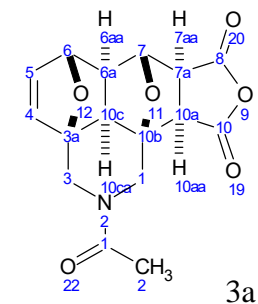

FZ7055-1.ESP

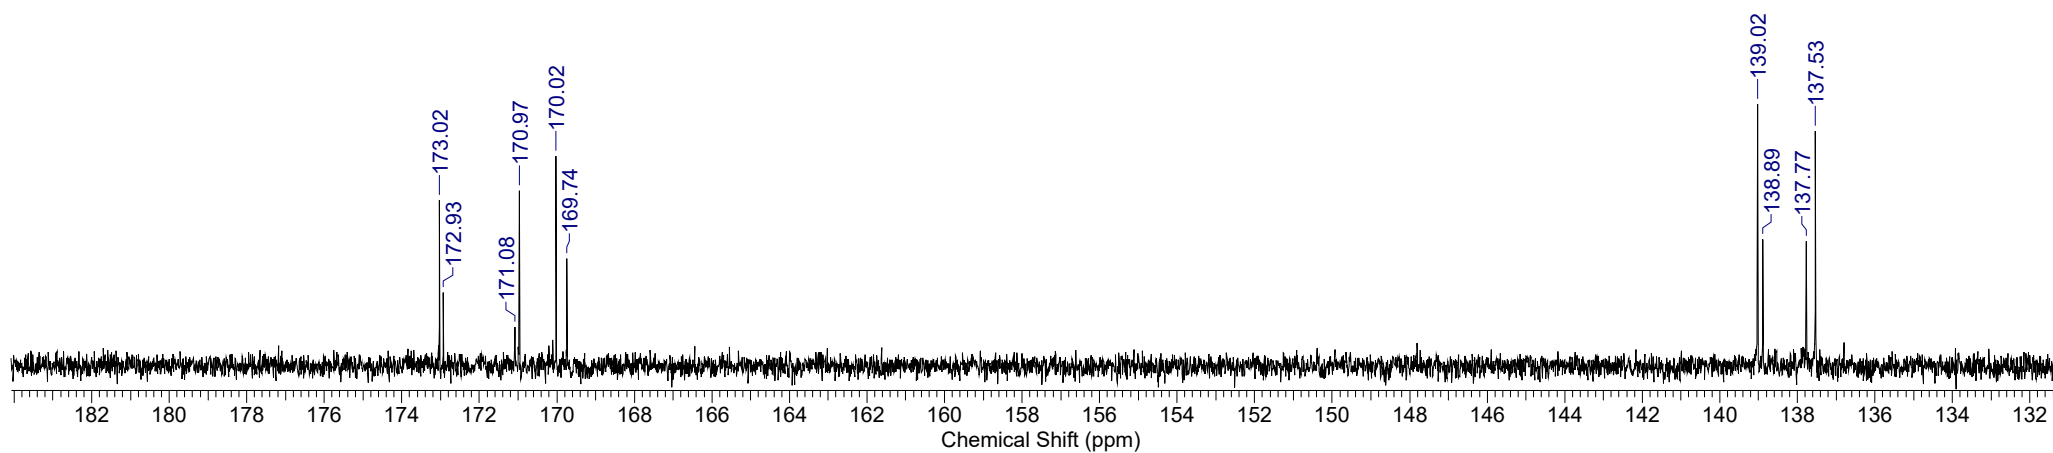

|                                                                |                    |
|----------------------------------------------------------------|--------------------|
| <b>Formula</b> C <sub>16</sub> H <sub>15</sub> NO <sub>6</sub> | <b>FW</b> 317.2934 |
|----------------------------------------------------------------|--------------------|

|                                        |                                                 |                                    |
|----------------------------------------|-------------------------------------------------|------------------------------------|
| <b>Acquisition Time (sec)</b> 0.6921   | <b>Comment</b> single pulse decoupled gated NOE | <b>Date</b> 11 Jan 1990 03:20:08   |
| <b>Date Stamp</b> 13 Dec 2018 17:15:47 | <b>File Name</b> E:\ЯМР для Лизы\FZ7055-1.JDF   | <b>Frequency (MHz)</b> 150.91      |
| <b>Nucleus</b> 13C                     | <b>Number of Transients</b> 1000                | <b>Origin</b> ECA 600              |
| <b>Points Count</b> 32768              | <b>Pulse Sequence</b> single pulse dec          | <b>Original Points Count</b> 32768 |
| <b>Spectrum Offset (Hz)</b> 15091.3428 | <b>Sweep Width (Hz)</b> 47348.49                | <b>Receiver Gain</b> 56.00         |
|                                        |                                                 | <b>Owner</b> delta                 |
|                                        |                                                 | <b>Solvent</b> DMSO-d6             |

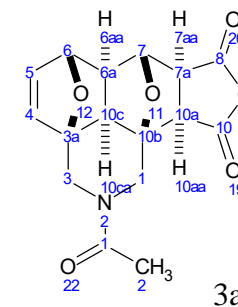

FZ7055-1.ESP

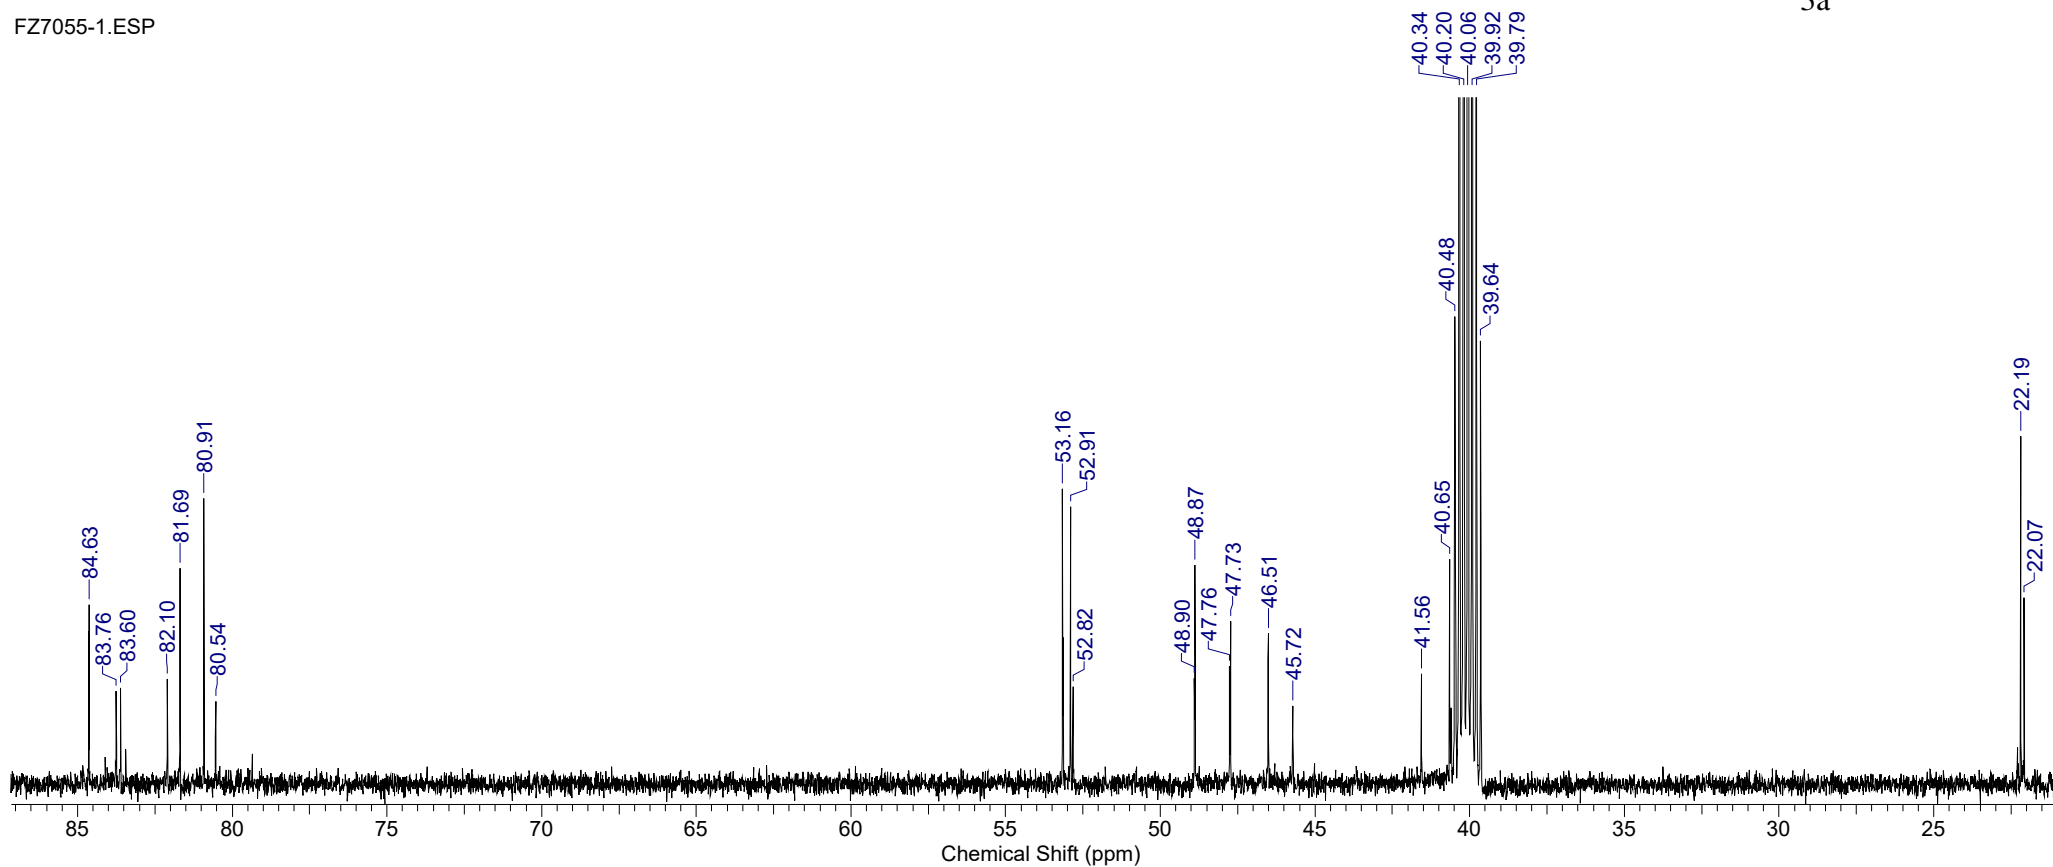

|                                                                |                    |
|----------------------------------------------------------------|--------------------|
| <b>Formula</b> C <sub>19</sub> H <sub>21</sub> NO <sub>7</sub> | <b>FW</b> 375.3725 |
|----------------------------------------------------------------|--------------------|

|                                                          |                                    |                                       |                                        |
|----------------------------------------------------------|------------------------------------|---------------------------------------|----------------------------------------|
| <b>Acquisition Time (sec)</b> 2.4222                     | <b>Comment</b> single_pulse        | <b>Date</b> 12 Feb 2015 13:05:20      | <b>Date Stamp</b> 12 Feb 2015 12:11:54 |
| <b>File Name</b> C:\USERS\laba534\DOWNLOADS\FZ4066-1.JDF | <b>Frequency (MHz)</b> 600.17      | <b>Nucleus</b> 1H                     | <b>Number of Transients</b> 8          |
| <b>Origin</b> ECA 600                                    | <b>Original Points Count</b> 32768 | <b>Owner</b> delta                    | <b>Points Count</b> 32768              |
| <b>Receiver Gain</b> 36.00                               | <b>Solvent</b> DMSO-d6             | <b>Spectrum Offset (Hz)</b> 3622.6279 | <b>Sweep Width (Hz)</b> 13528.14       |
|                                                          |                                    |                                       | <b>Temperature (degree C)</b> 22.900   |

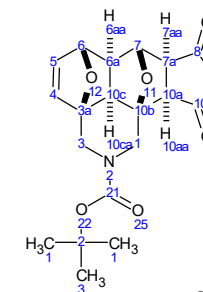

3b

FZ4066-1.JDF

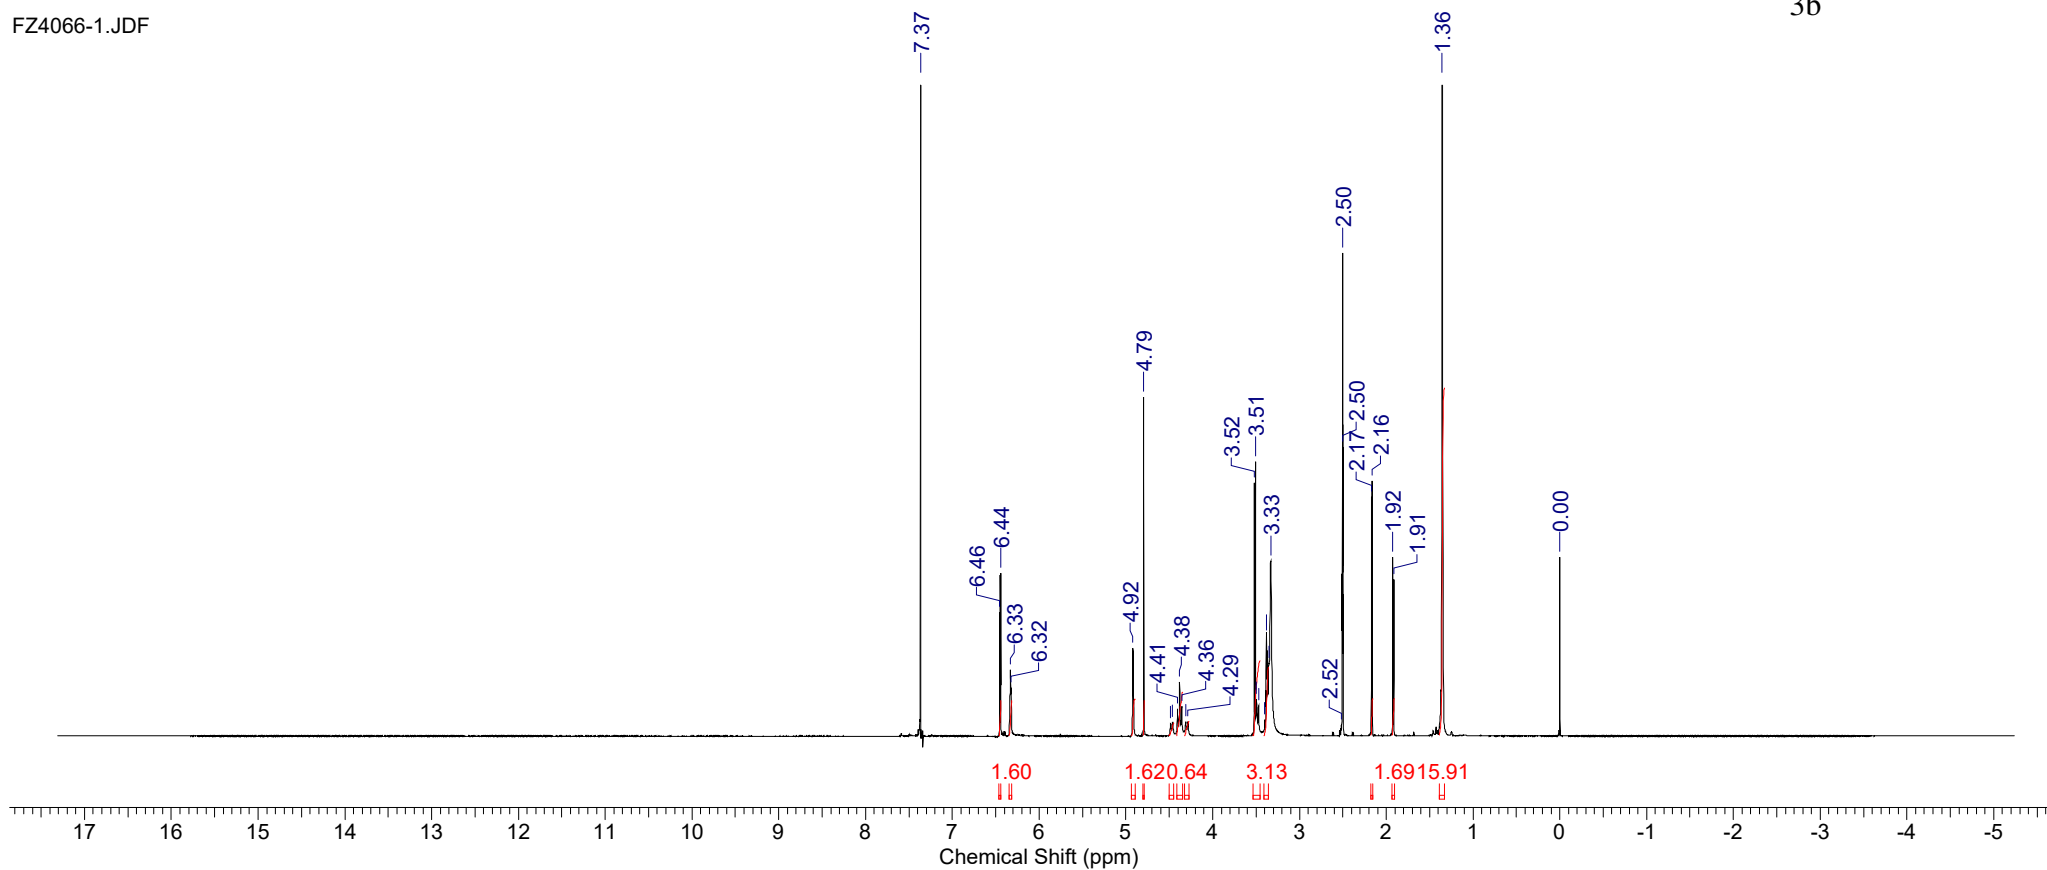

|                                                                |                    |
|----------------------------------------------------------------|--------------------|
| <b>Formula</b> C <sub>19</sub> H <sub>21</sub> NO <sub>7</sub> | <b>FW</b> 375.3725 |
|----------------------------------------------------------------|--------------------|

|                                                          |                                    |                                       |                                        |
|----------------------------------------------------------|------------------------------------|---------------------------------------|----------------------------------------|
| <b>Acquisition Time (sec)</b> 2.4222                     | <b>Comment</b> single_pulse        | <b>Date</b> 12 Feb 2015 13:05:20      | <b>Date Stamp</b> 12 Feb 2015 12:11:54 |
| <b>File Name</b> C:\USERS\laba534\DOWNLOADS\FZ4066-1.JDF | <b>Frequency (MHz)</b> 600.17      | <b>Nucleus</b> 1H                     | <b>Number of Transients</b> 8          |
| <b>Origin</b> ECA 600                                    | <b>Original Points Count</b> 32768 | <b>Owner</b> delta                    | <b>Points Count</b> 32768              |
| <b>Receiver Gain</b> 36.00                               | <b>Solvent</b> DMSO-d6             | <b>Spectrum Offset (Hz)</b> 3622.6279 | <b>Sweep Width (Hz)</b> 13528.14       |
|                                                          |                                    |                                       | <b>Temperature (degree C)</b> 22.900   |

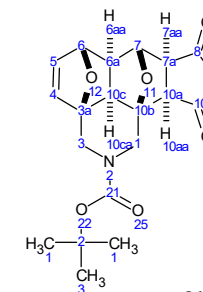

3b

FZ4066-1.JDF

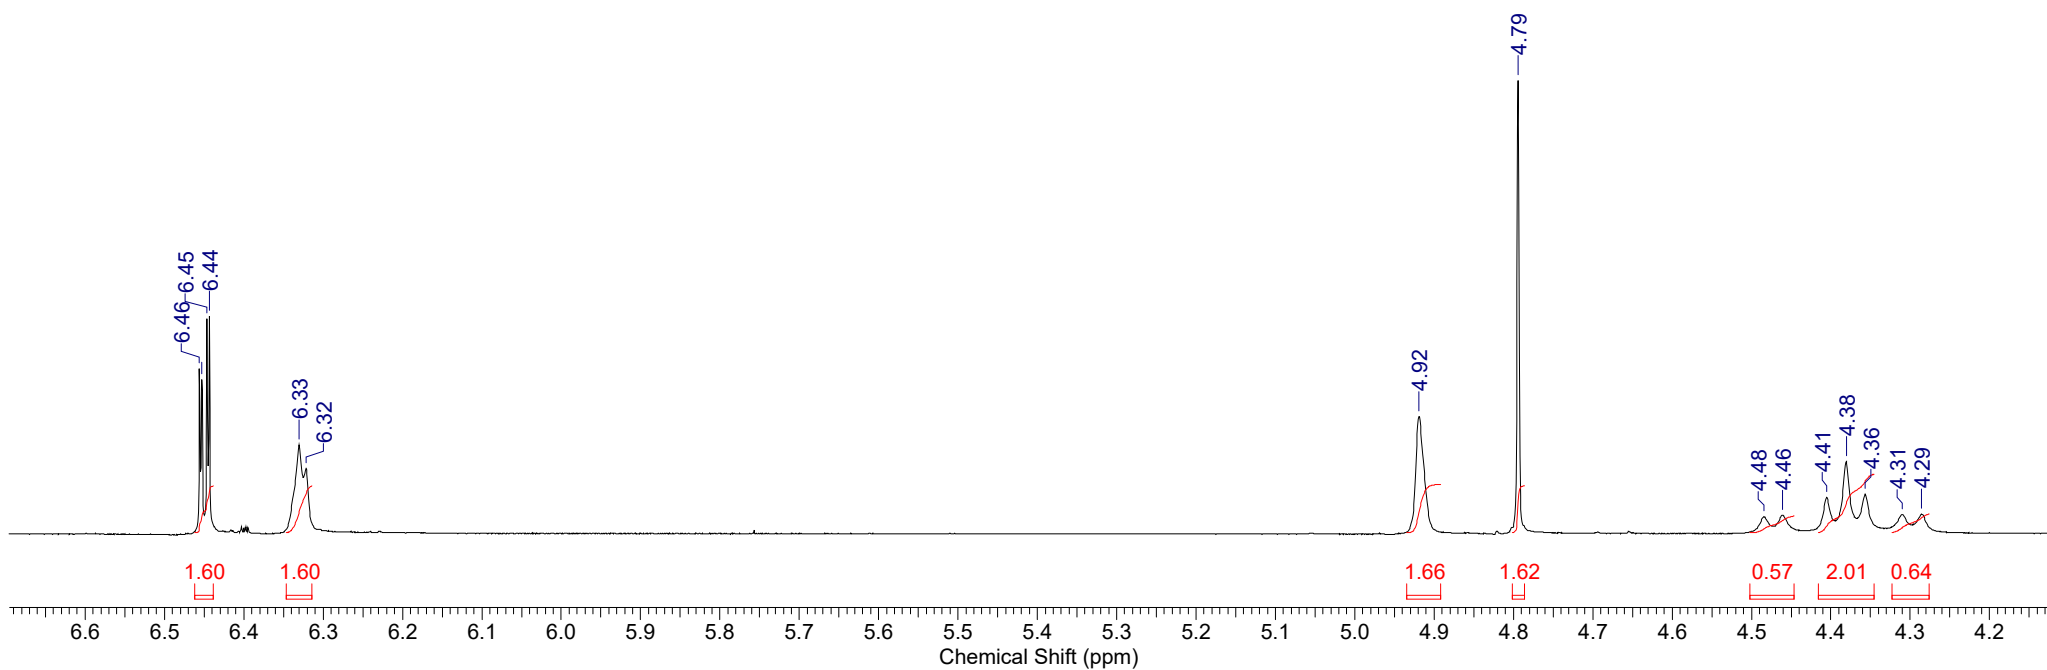

|                                                                |                    |
|----------------------------------------------------------------|--------------------|
| <b>Formula</b> C <sub>19</sub> H <sub>21</sub> NO <sub>7</sub> | <b>FW</b> 375.3725 |
|----------------------------------------------------------------|--------------------|

|                                                          |                                    |                                       |                                        |
|----------------------------------------------------------|------------------------------------|---------------------------------------|----------------------------------------|
| <b>Acquisition Time (sec)</b> 2.4222                     | <b>Comment</b> single_pulse        | <b>Date</b> 12 Feb 2015 13:05:20      | <b>Date Stamp</b> 12 Feb 2015 12:11:54 |
| <b>File Name</b> C:\USERS\Ia6a534\DOWNLOADS\FZ4066-1.JDF | <b>Frequency (MHz)</b> 600.17      | <b>Nucleus</b> 1H                     | <b>Number of Transients</b> 8          |
| <b>Origin</b> ECA 600                                    | <b>Original Points Count</b> 32768 | <b>Owner</b> delta                    | <b>Points Count</b> 32768              |
| <b>Receiver Gain</b> 36.00                               | <b>Solvent</b> DMSO-d6             | <b>Spectrum Offset (Hz)</b> 3622.6279 | <b>Sweep Width (Hz)</b> 13528.14       |
|                                                          |                                    | <b>Temperature (degree C)</b> 22.900  |                                        |

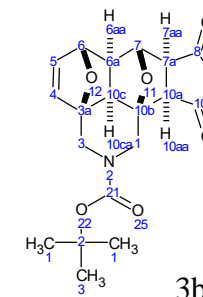

FZ4066-1.JDF

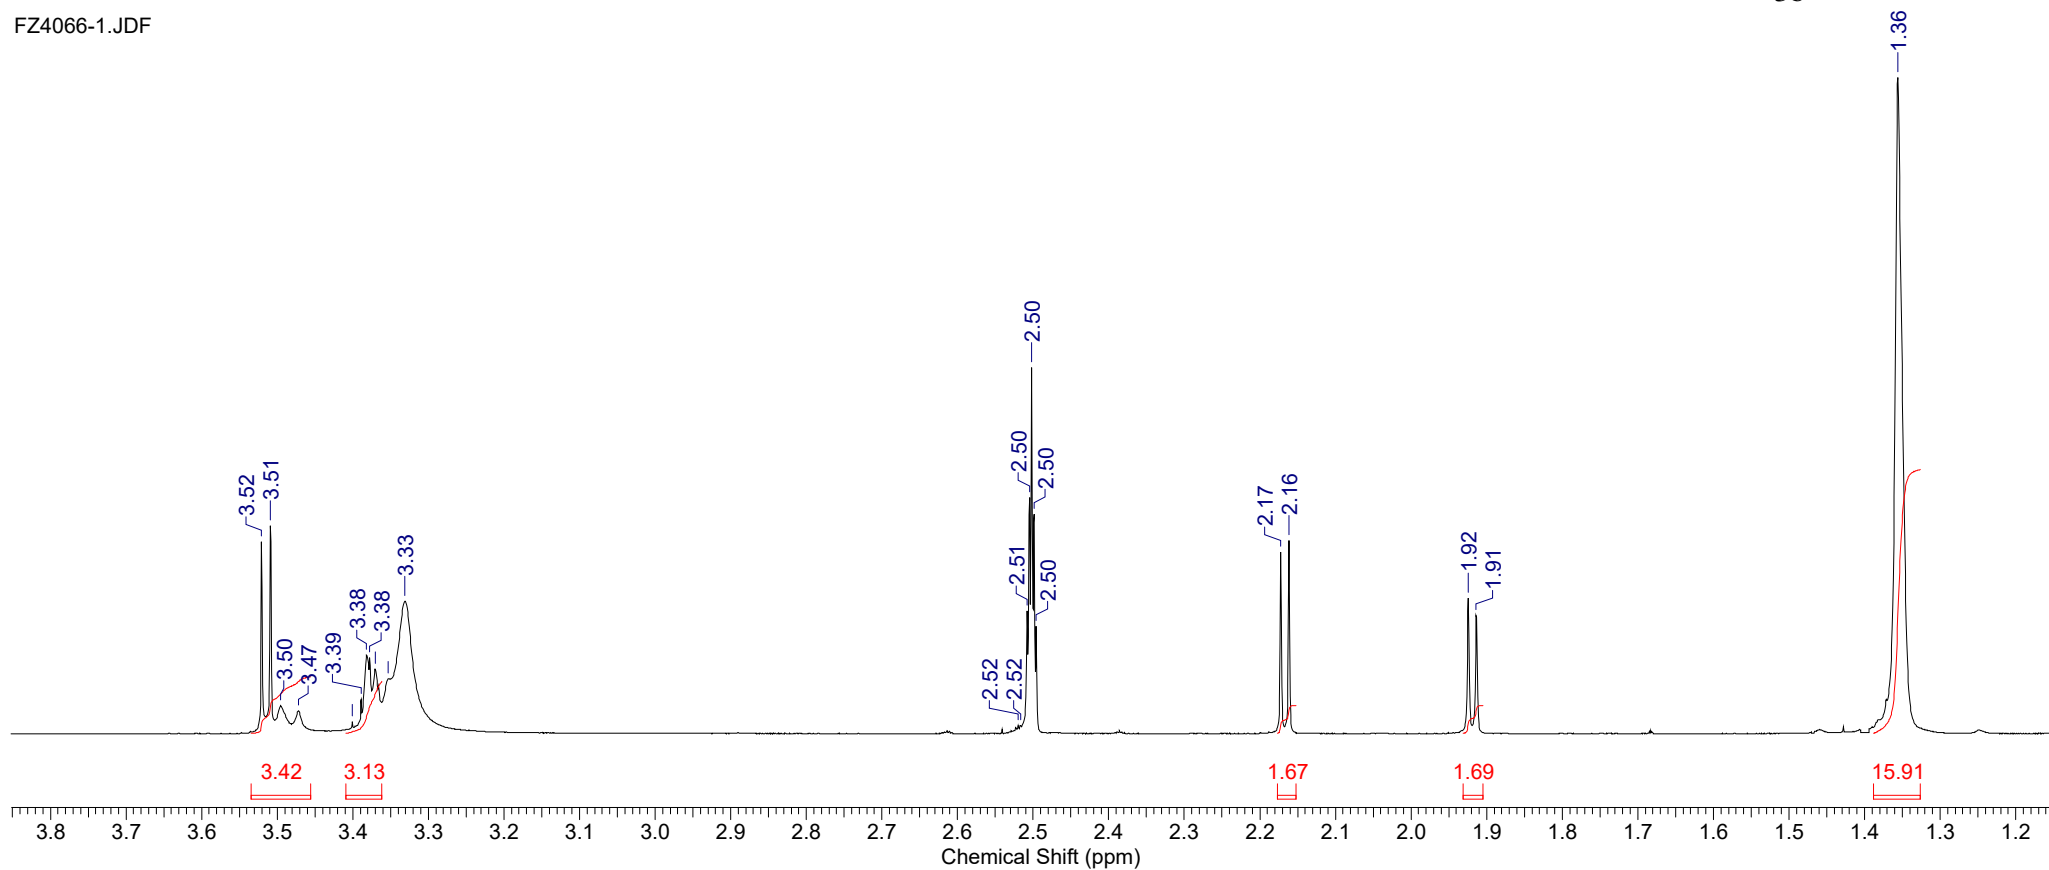



|                                                                |                    |
|----------------------------------------------------------------|--------------------|
| <b>Formula</b> C <sub>19</sub> H <sub>21</sub> NO <sub>7</sub> | <b>FW</b> 375.3725 |
|----------------------------------------------------------------|--------------------|

|                                        |                                                           |                                        |
|----------------------------------------|-----------------------------------------------------------|----------------------------------------|
| <b>Acquisition Time (sec)</b> 0.6921   | <b>Comment</b> single pulse decoupled gated NOE           | <b>Date</b> 15 Feb 2013 09:18:01       |
| <b>Date Stamp</b> 15 Feb 2013 08:31:23 | <b>File Name</b> C:\USERS\Jla6a534\DOWNLOADS\FZ2752-1.JDF |                                        |
| <b>Frequency (MHz)</b> 150.91          | <b>Nucleus</b> 13C                                        | <b>Number of Transients</b> 156        |
| <b>Original Points Count</b> 32768     | <b>Owner</b> delta                                        | <b>Points Count</b> 32768              |
| <b>Receiver Gain</b> 54.00             | <b>Solvent</b> DMSO-d6                                    | <b>Pulse Sequence</b> single pulse dec |
| <b>Temperature (degree C)</b> 22.700   | <b>Spectrum Offset (Hz)</b> 15091.3428                    | <b>Sweep Width (Hz)</b> 47348.49       |

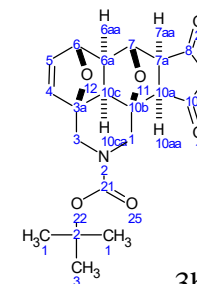

FZ2752-1.JDF

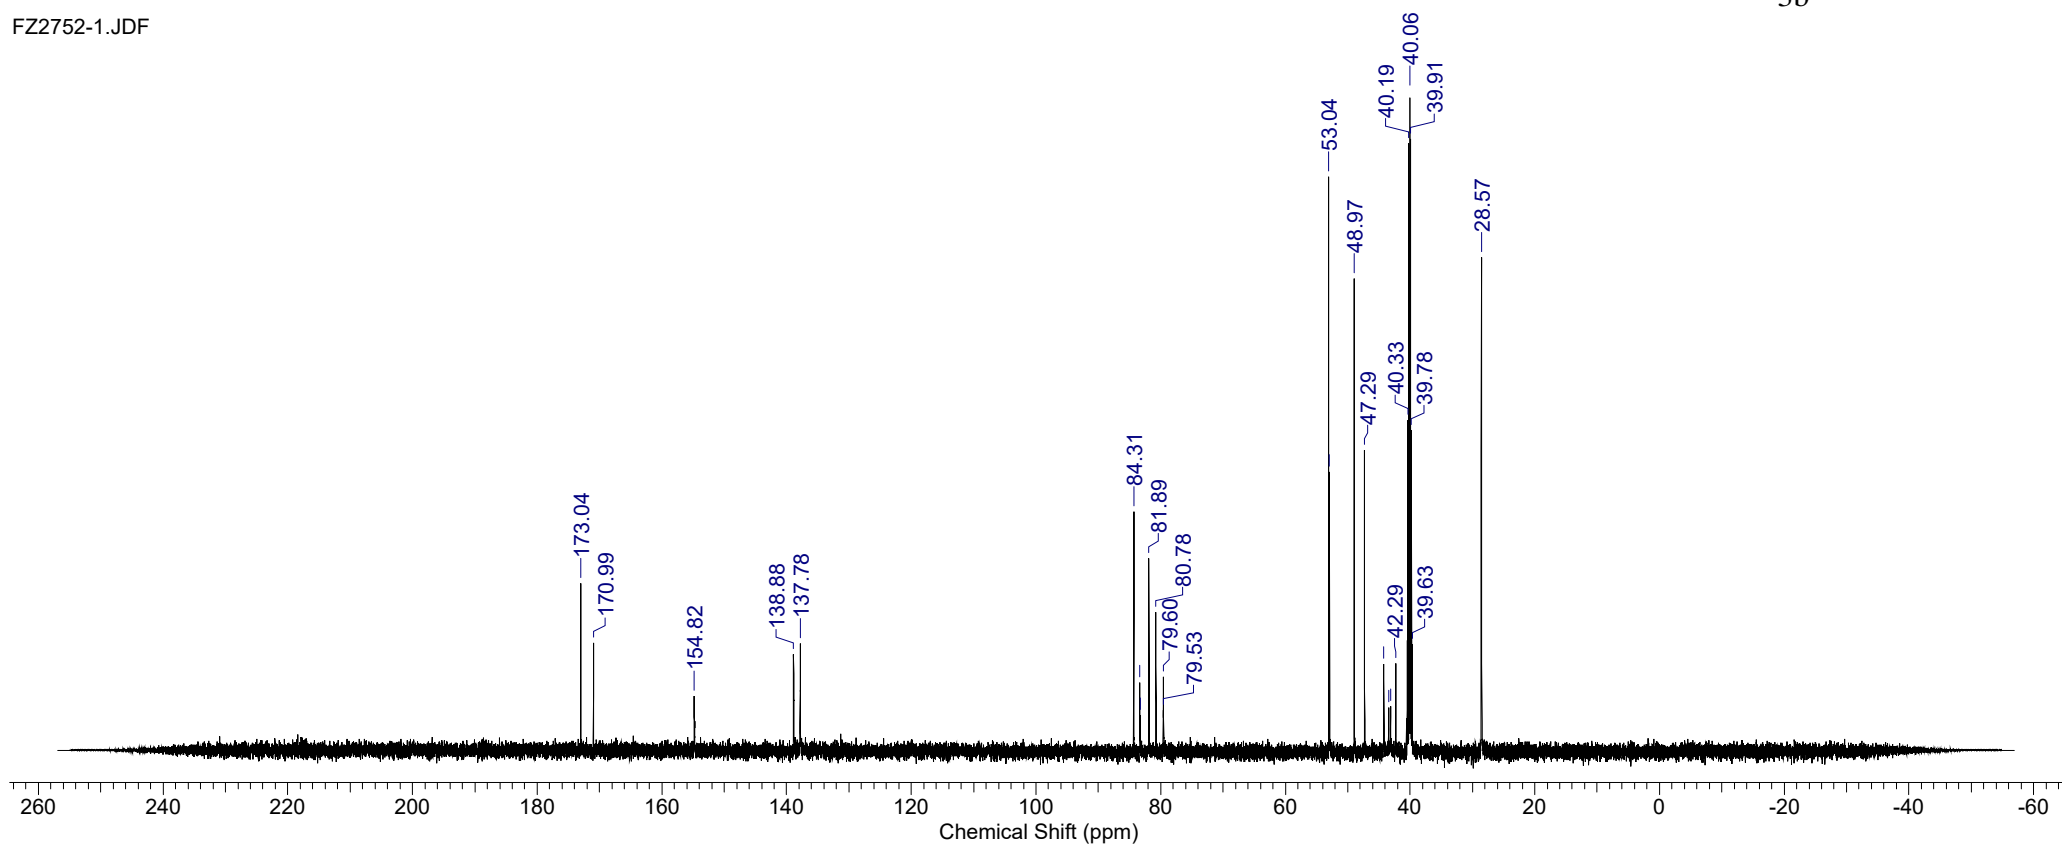

|                                                                |                    |
|----------------------------------------------------------------|--------------------|
| <b>Formula</b> C <sub>19</sub> H <sub>21</sub> NO <sub>7</sub> | <b>FW</b> 375.3725 |
|----------------------------------------------------------------|--------------------|

|                                        |                                                           |                                        |
|----------------------------------------|-----------------------------------------------------------|----------------------------------------|
| <b>Acquisition Time (sec)</b> 0.6921   | <b>Comment</b> single pulse decoupled gated NOE           | <b>Date</b> 15 Feb 2013 09:18:01       |
| <b>Date Stamp</b> 15 Feb 2013 08:31:23 | <b>File Name</b> C:\USERS\Jla6a534\DOWNLOADS\FZ2752-1.JDF |                                        |
| <b>Frequency (MHz)</b> 150.91          | <b>Nucleus</b> 13C                                        | <b>Number of Transients</b> 156        |
| <b>Original Points Count</b> 32768     | <b>Owner</b> delta                                        | <b>Points Count</b> 32768              |
| <b>Receiver Gain</b> 54.00             | <b>Solvent</b> DMSO-d6                                    | <b>Pulse Sequence</b> single pulse dec |
| <b>Temperature (degree C)</b> 22.700   | <b>Spectrum Offset (Hz)</b> 15091.3428                    | <b>Sweep Width (Hz)</b> 47348.49       |

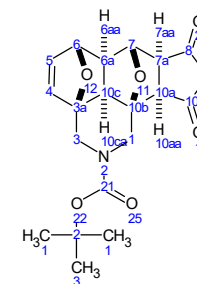

3b

FZ2752-1.JDF

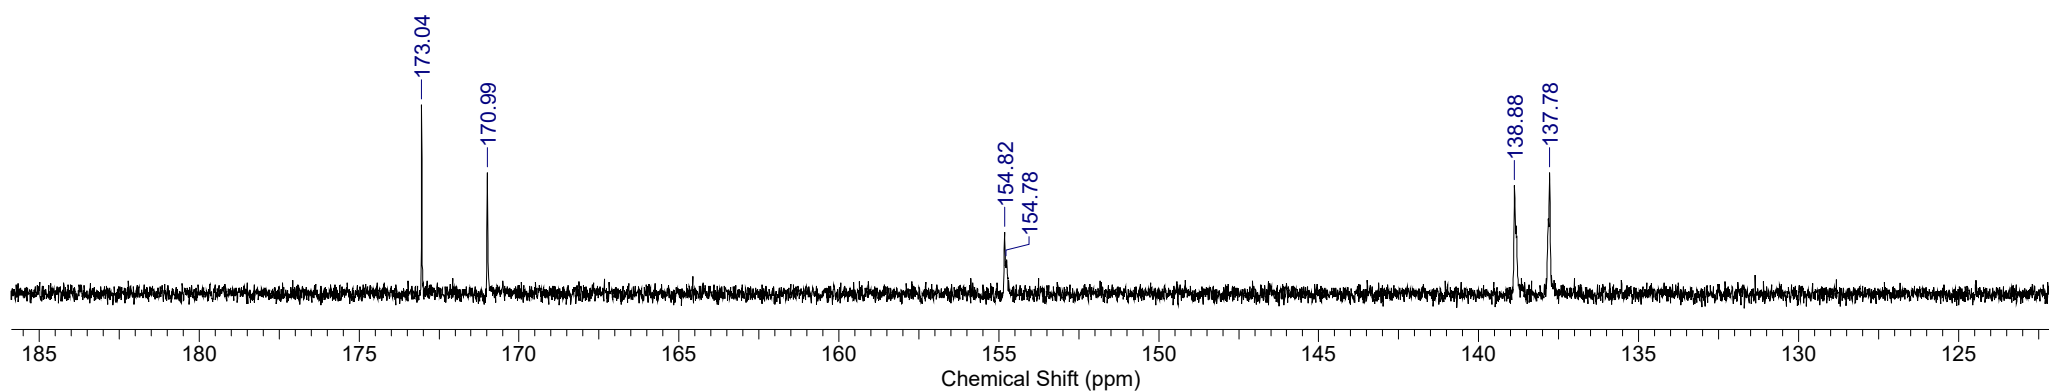

|                                                                |                    |
|----------------------------------------------------------------|--------------------|
| <b>Formula</b> C <sub>19</sub> H <sub>21</sub> NO <sub>7</sub> | <b>FW</b> 375.3725 |
|----------------------------------------------------------------|--------------------|

|                                        |                                                           |                                        |
|----------------------------------------|-----------------------------------------------------------|----------------------------------------|
| <b>Acquisition Time (sec)</b> 0.6921   | <b>Comment</b> single pulse decoupled gated NOE           | <b>Date</b> 15 Feb 2013 09:18:01       |
| <b>Date Stamp</b> 15 Feb 2013 08:31:23 | <b>File Name</b> C:\USERS\Jla6a534\DOWNLOADS\FZ2752-1.JDF |                                        |
| <b>Frequency (MHz)</b> 150.91          | <b>Nucleus</b> 13C                                        | <b>Number of Transients</b> 156        |
| <b>Original Points Count</b> 32768     | <b>Owner</b> delta                                        | <b>Points Count</b> 32768              |
| <b>Receiver Gain</b> 54.00             | <b>Solvent</b> DMSO-d6                                    | <b>Pulse Sequence</b> single pulse dec |
| <b>Temperature (degree C)</b> 22.700   | <b>Spectrum Offset (Hz)</b> 15091.3428                    | <b>Sweep Width (Hz)</b> 47348.49       |

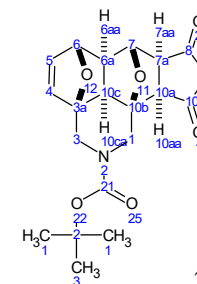

3b

FZ2752-1.JDF

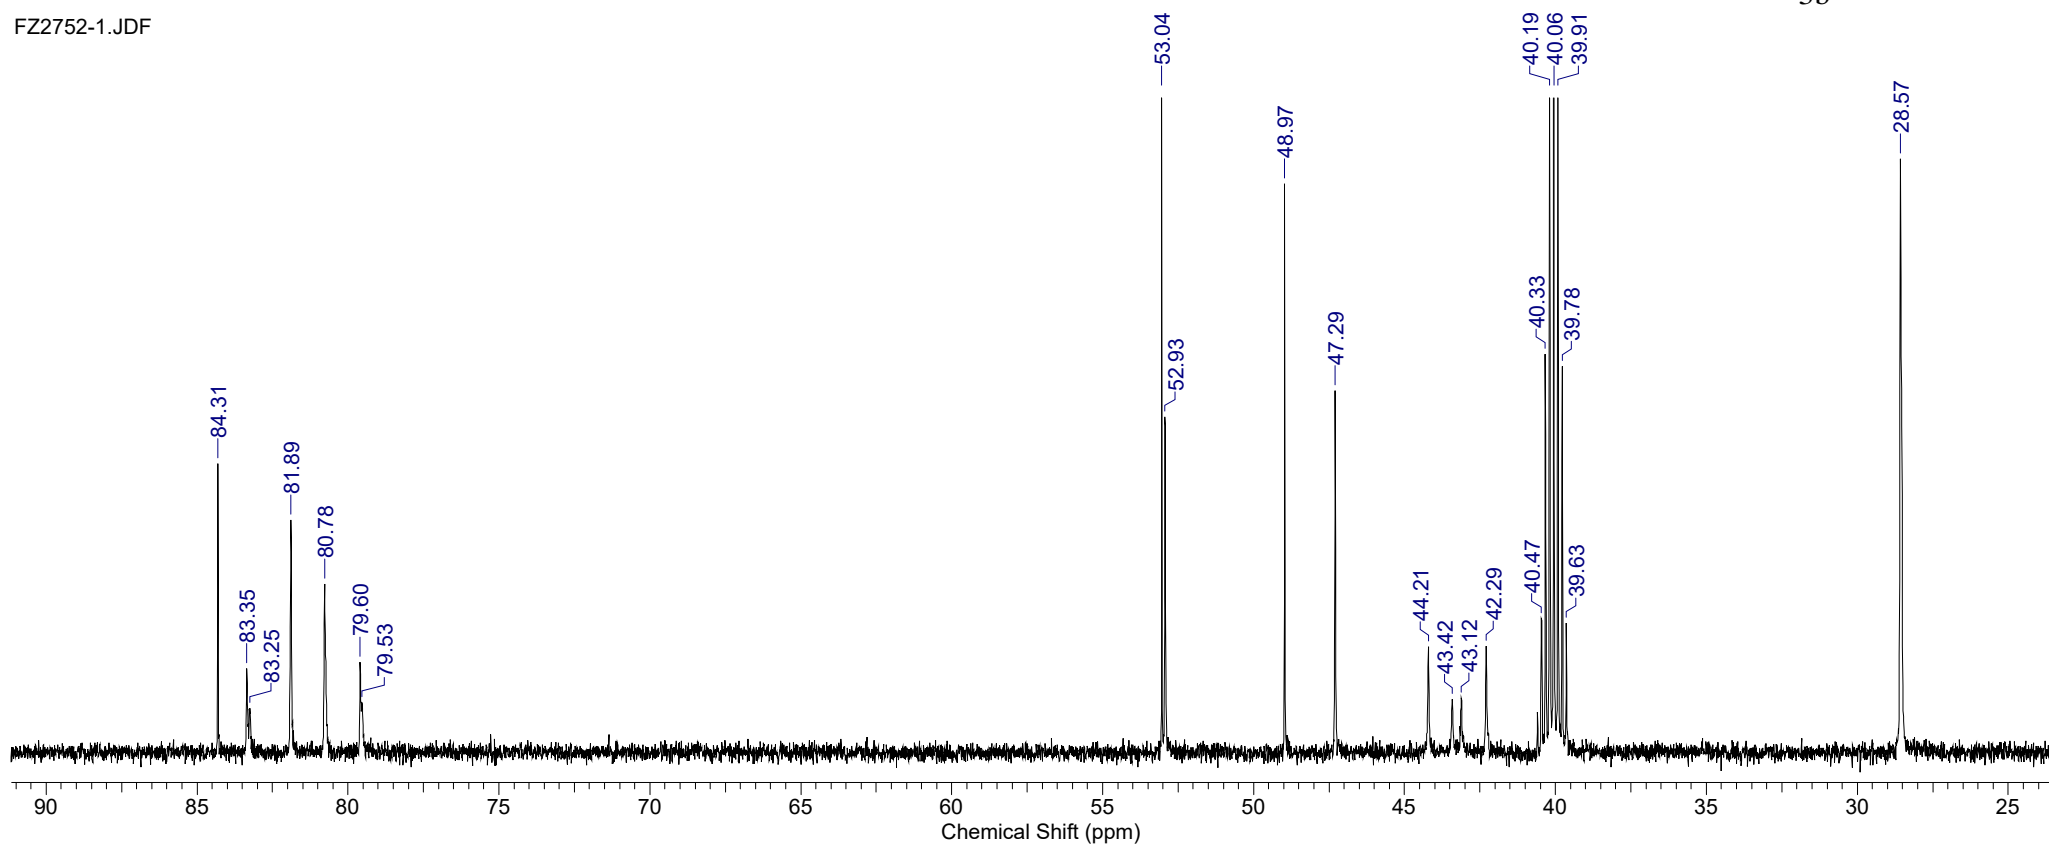

|                                                                |                    |
|----------------------------------------------------------------|--------------------|
| <b>Formula</b> C <sub>16</sub> H <sub>15</sub> NO <sub>7</sub> | <b>FW</b> 333.2928 |
|----------------------------------------------------------------|--------------------|

|                                        |                                        |                                                           |                                    |
|----------------------------------------|----------------------------------------|-----------------------------------------------------------|------------------------------------|
| <b>Acquisition Time (sec)</b> 1.2111   | <b>Comment</b> single pulse            | <b>Date</b> 19 May 2015 09:52:26                          |                                    |
| <b>Date Stamp</b> 19 May 2015 08:59:05 |                                        | <b>File Name</b> C:\USERS\lta6a534\DOWNLOADS\FZ4289-1.JDF | <b>Frequency (MHz)</b> 600.17      |
| <b>Nucleus</b> 1H                      | <b>Number of Transients</b> 8          | <b>Origin</b> ECA 600                                     | <b>Original Points Count</b> 16384 |
| <b>Points Count</b> 16384              | <b>Pulse Sequence</b> single_pulse.ex2 | <b>Receiver Gain</b> 38.00                                | <b>Owner</b> delta                 |
| <b>Spectrum Offset (Hz)</b> 3623.7708  | <b>Sweep Width (Hz)</b> 13528.14       | <b>Temperature (degree C)</b> 20.100                      | <b>Solvent</b> DMSO-d6             |

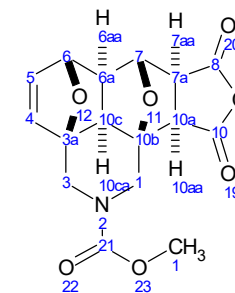

3c

FZ4289-1.JDF

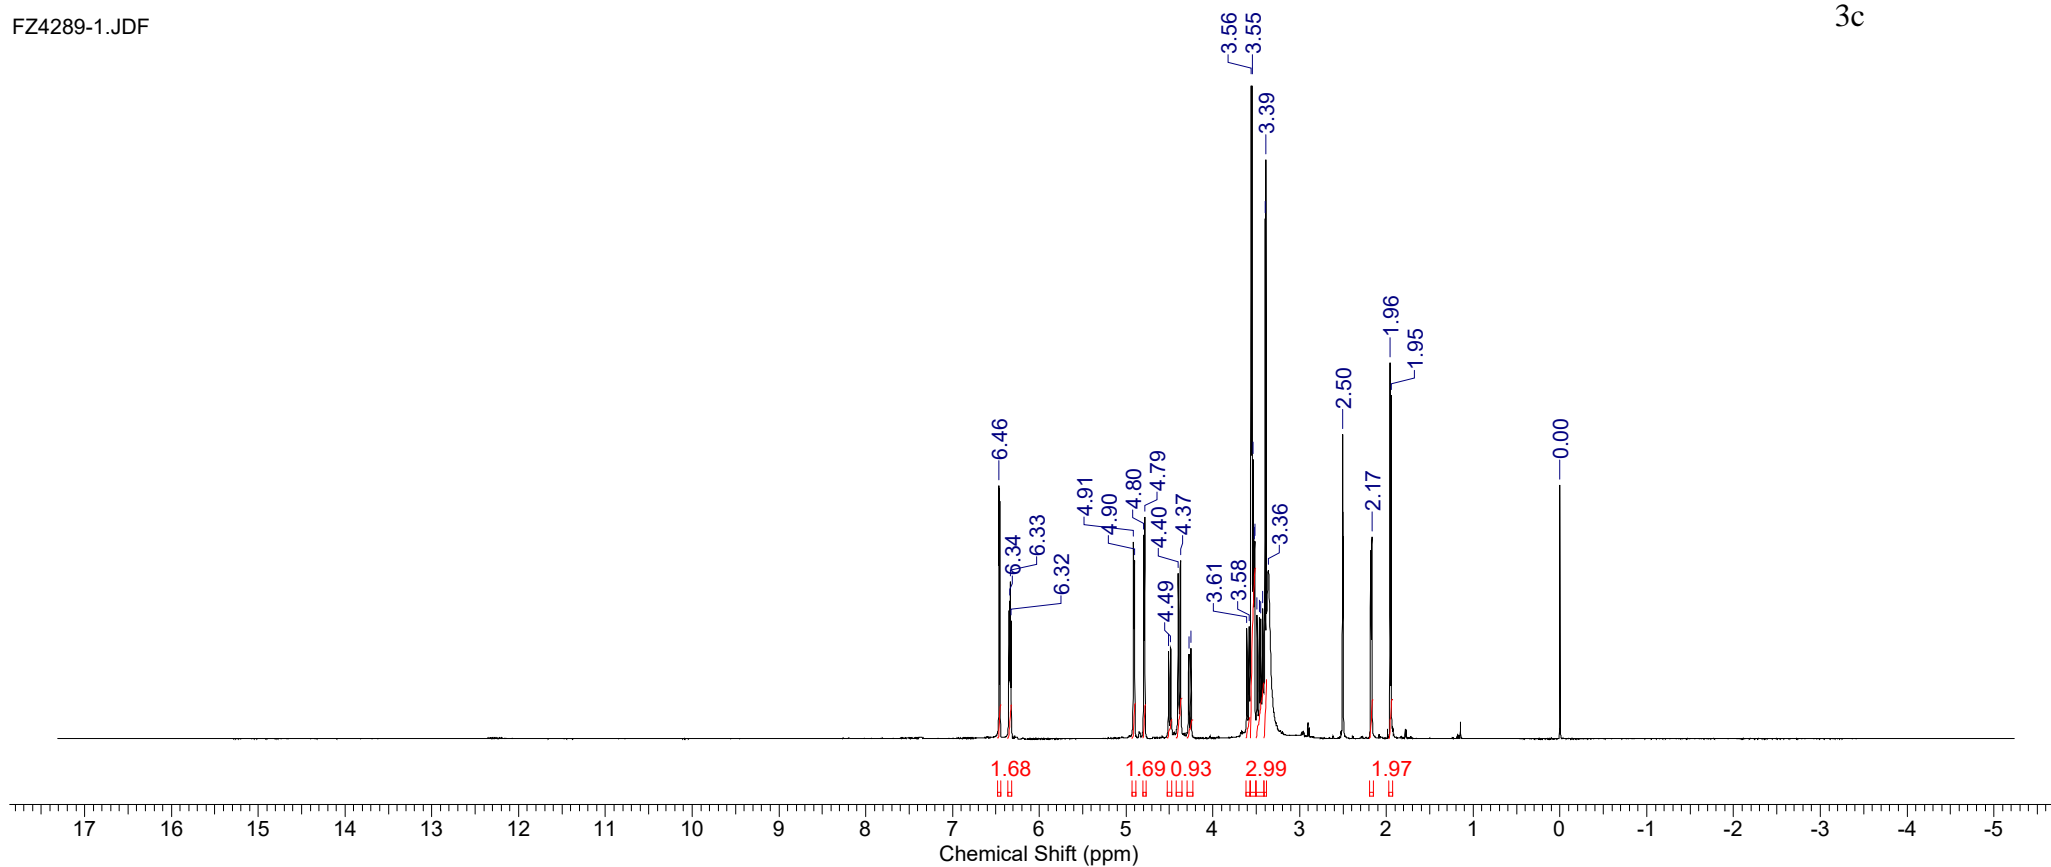

|                                                                |                    |
|----------------------------------------------------------------|--------------------|
| <b>Formula</b> C <sub>16</sub> H <sub>15</sub> NO <sub>7</sub> | <b>FW</b> 333.2928 |
|----------------------------------------------------------------|--------------------|

|                                        |                                                           |                                      |                               |
|----------------------------------------|-----------------------------------------------------------|--------------------------------------|-------------------------------|
| <b>Acquisition Time (sec)</b> 1.2111   | <b>Comment</b> single pulse                               | <b>Date</b> 19 May 2015 09:52:26     | <b>Frequency (MHz)</b> 600.17 |
| <b>Date Stamp</b> 19 May 2015 08:59:05 | <b>File Name</b> C:\USERS\Л1а6а534\DOWNLOADS\FZ4289-1.JDF | <b>Original Points Count</b> 16384   | <b>Owner</b> delta            |
| <b>Nucleus</b> 1H                      | <b>Number of Transients</b> 8                             | <b>Origin</b> ECA 600                | <b>Receiver Gain</b> 38.00    |
| <b>Points Count</b> 16384              | <b>Pulse Sequence</b> single_pulse.ex2                    | <b>Solvent</b> DMSO-d6               |                               |
| <b>Spectrum Offset (Hz)</b> 3623.7708  | <b>Sweep Width (Hz)</b> 13528.14                          | <b>Temperature (degree C)</b> 20.100 |                               |



3c

FZ4289-1.JDF

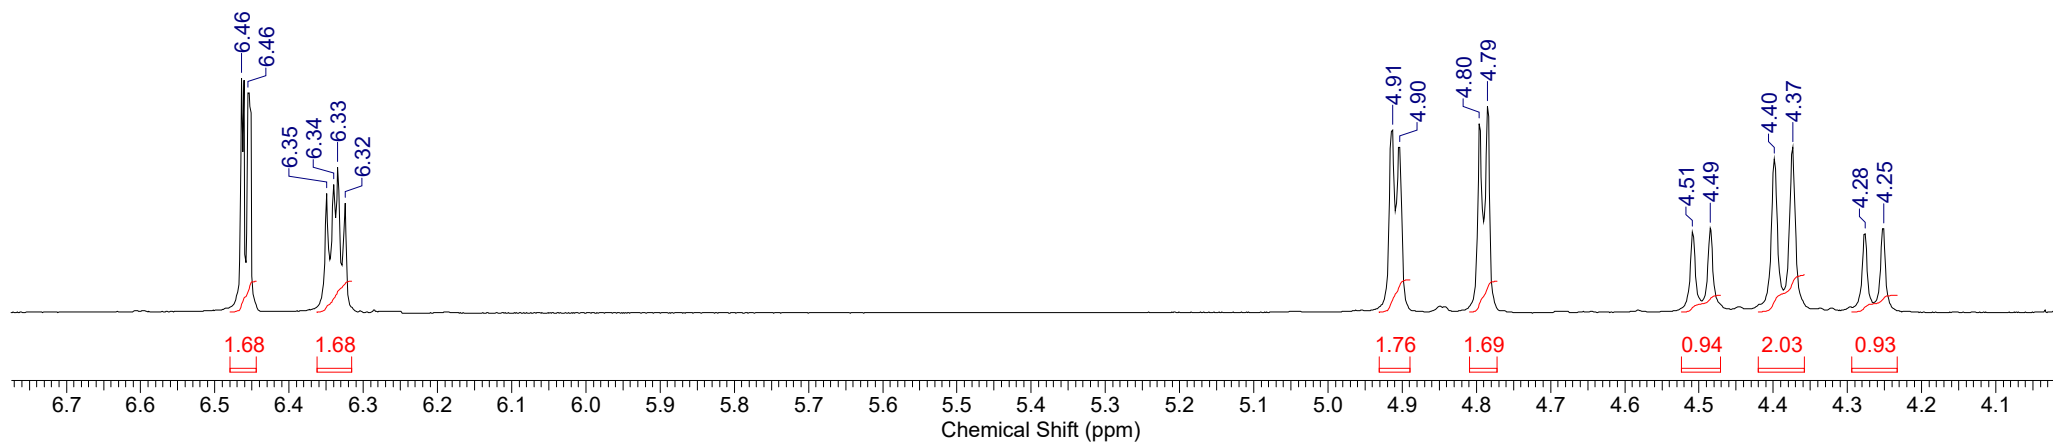

|                                                                |                    |
|----------------------------------------------------------------|--------------------|
| <b>Formula</b> C <sub>16</sub> H <sub>15</sub> NO <sub>7</sub> | <b>FW</b> 333.2928 |
|----------------------------------------------------------------|--------------------|

|                                        |                                        |                                                           |                                    |
|----------------------------------------|----------------------------------------|-----------------------------------------------------------|------------------------------------|
| <b>Acquisition Time (sec)</b> 1.2111   | <b>Comment</b> single pulse            | <b>Date</b> 19 May 2015 09:52:26                          |                                    |
| <b>Date Stamp</b> 19 May 2015 08:59:05 |                                        | <b>File Name</b> C:\USERS\lta6a534\DOWNLOADS\FZ4289-1.JDF | <b>Frequency (MHz)</b> 600.17      |
| <b>Nucleus</b> 1H                      | <b>Number of Transients</b> 8          | <b>Origin</b> ECA 600                                     | <b>Original Points Count</b> 16384 |
| <b>Points Count</b> 16384              | <b>Pulse Sequence</b> single_pulse.ex2 | <b>Receiver Gain</b> 38.00                                | <b>Owner</b> delta                 |
| <b>Spectrum Offset (Hz)</b> 3623.7708  | <b>Sweep Width (Hz)</b> 13528.14       | <b>Temperature (degree C)</b> 20.100                      | <b>Solvent</b> DMSO-d6             |

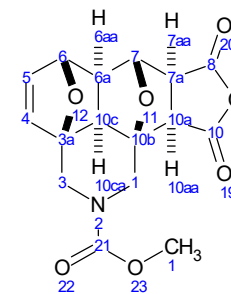

3c

FZ4289-1.JDF

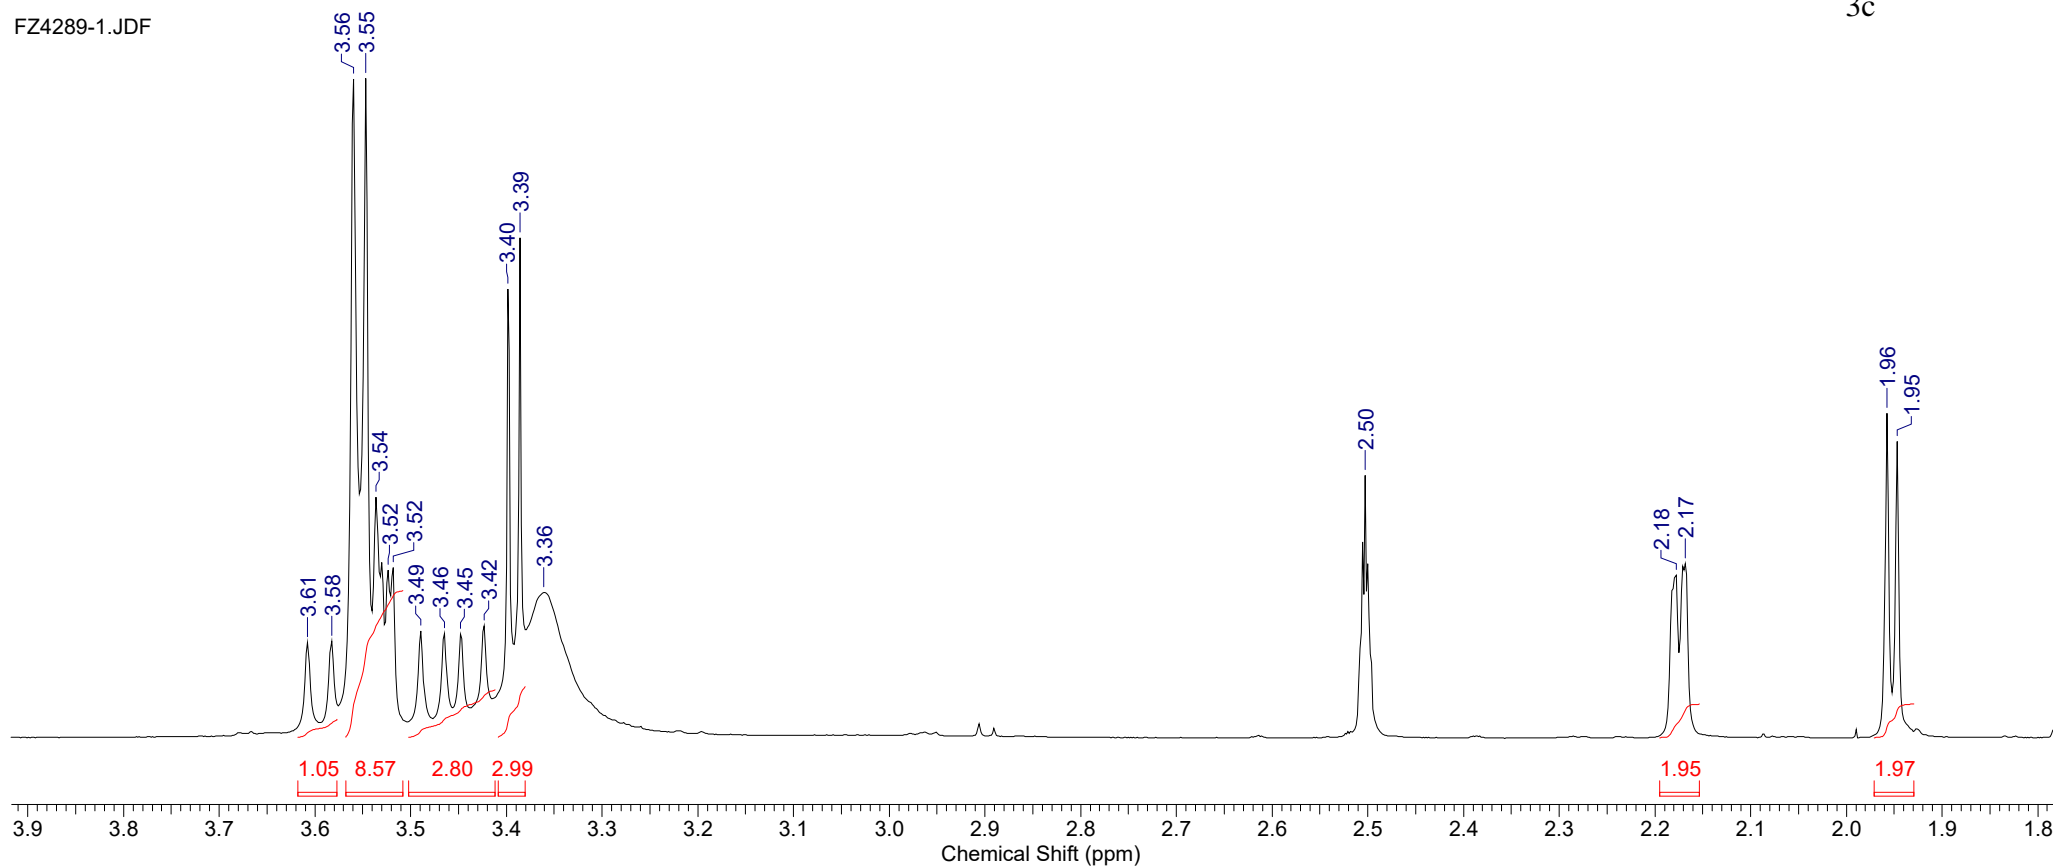

|                                                                |                    |
|----------------------------------------------------------------|--------------------|
| <b>Formula</b> C <sub>16</sub> H <sub>15</sub> NO <sub>7</sub> | <b>FW</b> 333.2928 |
|----------------------------------------------------------------|--------------------|

|                                        |                                                                         |                                        |
|----------------------------------------|-------------------------------------------------------------------------|----------------------------------------|
| <b>Acquisition Time (sec)</b> 0.5571   | <b>Comment</b> 5 mm QNP 1H/15N/13C/31P Z3379/0400                       | <b>Date</b> 18 Jun 2015 09:31:44       |
| <b>Date Stamp</b> 18 Jun 2015 09:31:44 | <b>File Name</b> C:\USERS\Лаб6а534\DESKTOP\FZ-0615-KV-61-C13DEC_001001r |                                        |
| <b>Frequency (MHz)</b> 100.61          | <b>Nucleus</b> 13C                                                      | <b>Number of Transients</b> 767        |
| <b>Original Points Count</b> 16384     | <b>Owner</b> root                                                       | <b>Origin</b> spect                    |
| <b>Receiver Gain</b> 32768.00          | <b>SW(cyclical) (Hz)</b> 29411.77                                       | <b>Points Count</b> 65536              |
| <b>Sweep Width (Hz)</b> 29411.32       | <b>Temperature (degree C)</b> 27.000                                    | <b>Pulse Sequence</b> zgpg             |
|                                        | <b>Solvent</b> DMSO-d6                                                  | <b>Spectrum Offset (Hz)</b> 10547.2158 |

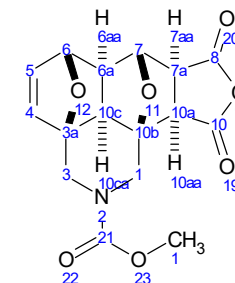

FZ-0615-KV-61-C13DEC\_001001r

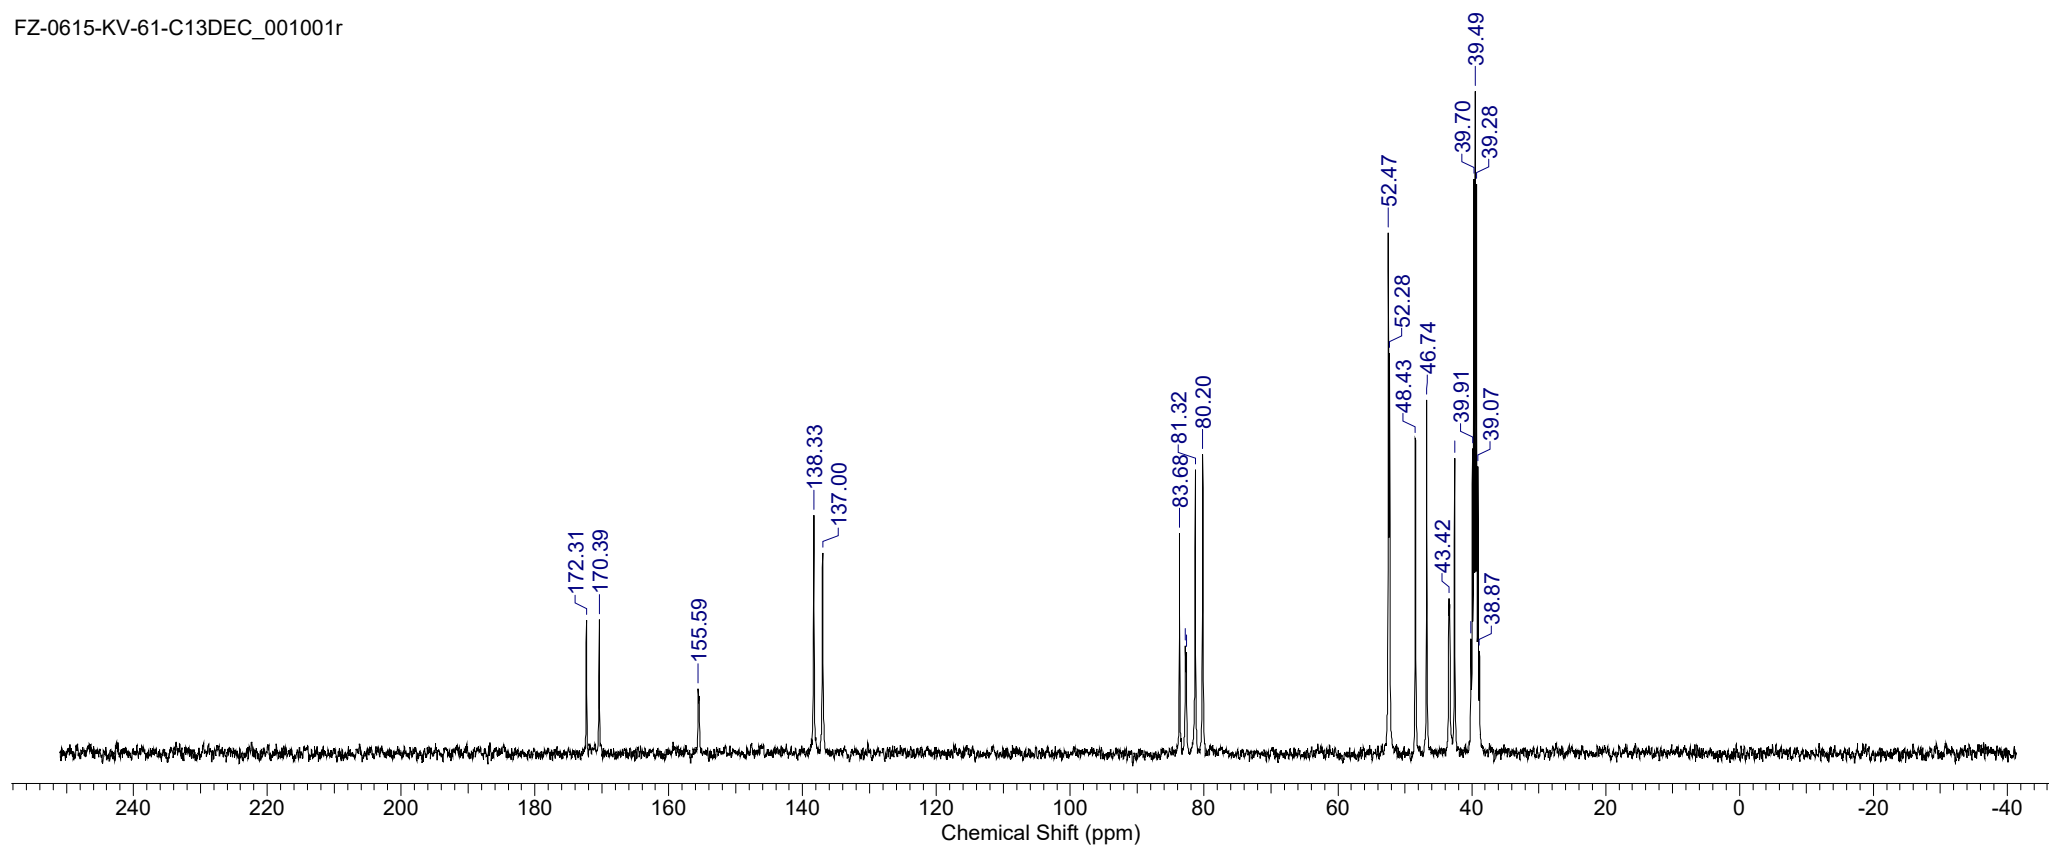

|                                                                |                    |
|----------------------------------------------------------------|--------------------|
| <b>Formula</b> C <sub>16</sub> H <sub>15</sub> NO <sub>7</sub> | <b>FW</b> 333.2928 |
|----------------------------------------------------------------|--------------------|

|                                        |                                                                        |                                        |
|----------------------------------------|------------------------------------------------------------------------|----------------------------------------|
| <b>Acquisition Time (sec)</b> 0.5571   | <b>Comment</b> 5 mm QNP 1H/15N/13C/31P Z3379/0400                      | <b>Date</b> 18 Jun 2015 09:31:44       |
| <b>Date Stamp</b> 18 Jun 2015 09:31:44 | <b>File Name</b> C:\USERS\Лабa534\DESKTOP\FZ-0615-KV-61-C13DEC_001001r |                                        |
| <b>Frequency (MHz)</b> 100.61          | <b>Nucleus</b> 13C                                                     | <b>Number of Transients</b> 767        |
| <b>Original Points Count</b> 16384     | <b>Owner</b> root                                                      | <b>Origin</b> spect                    |
| <b>Receiver Gain</b> 32768.00          | <b>SW(cyclical) (Hz)</b> 29411.77                                      | <b>Points Count</b> 65536              |
| <b>Sweep Width (Hz)</b> 29411.32       | <b>Temperature (degree C)</b> 27.000                                   | <b>Pulse Sequence</b> zgpg             |
|                                        | <b>Solvent</b> DMSO-d6                                                 | <b>Spectrum Offset (Hz)</b> 10547.2158 |

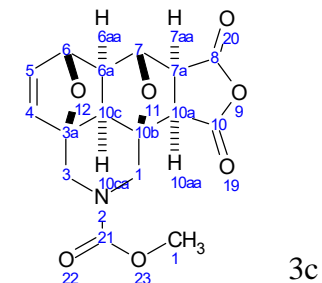

FZ-0615-KV-61-C13DEC\_001001r

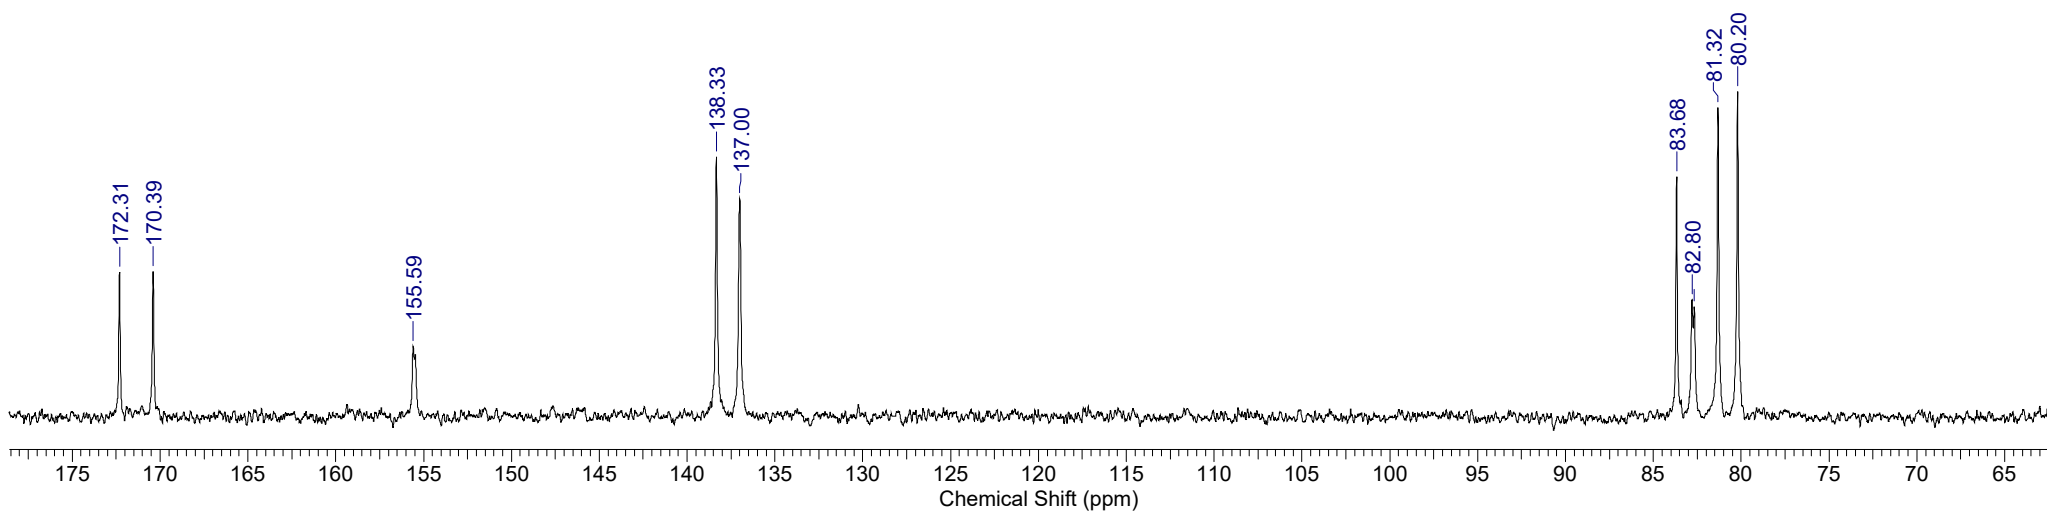



|                                                                |                    |
|----------------------------------------------------------------|--------------------|
| <b>Formula</b> C <sub>16</sub> H <sub>15</sub> NO <sub>7</sub> | <b>FW</b> 333.2928 |
|----------------------------------------------------------------|--------------------|

|                                        |                                                                        |                                        |
|----------------------------------------|------------------------------------------------------------------------|----------------------------------------|
| <b>Acquisition Time (sec)</b> 0.5571   | <b>Comment</b> 5 mm QNP 1H/15N/13C/31P Z3379/0400                      | <b>Date</b> 18 Jun 2015 09:31:44       |
| <b>Date Stamp</b> 18 Jun 2015 09:31:44 | <b>File Name</b> C:\USERS\Лабa534\DESKTOP\FZ-0615-KV-61-C13DEC_001001r |                                        |
| <b>Frequency (MHz)</b> 100.61          | <b>Nucleus</b> 13C                                                     | <b>Number of Transients</b> 767        |
| <b>Original Points Count</b> 16384     | <b>Owner</b> root                                                      | <b>Origin</b> spect                    |
| <b>Receiver Gain</b> 32768.00          | <b>SW(cyclical) (Hz)</b> 29411.77                                      | <b>Points Count</b> 65536              |
| <b>Sweep Width (Hz)</b> 29411.32       | <b>Temperature (degree C)</b> 27.000                                   | <b>Pulse Sequence</b> zgpg             |
|                                        | <b>Solvent</b> DMSO-d6                                                 | <b>Spectrum Offset (Hz)</b> 10547.2158 |

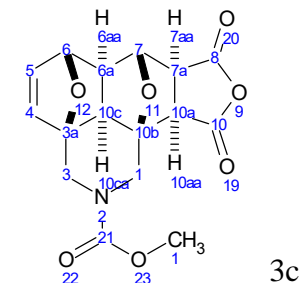

FZ-0615-KV-61-C13DEC\_001001r

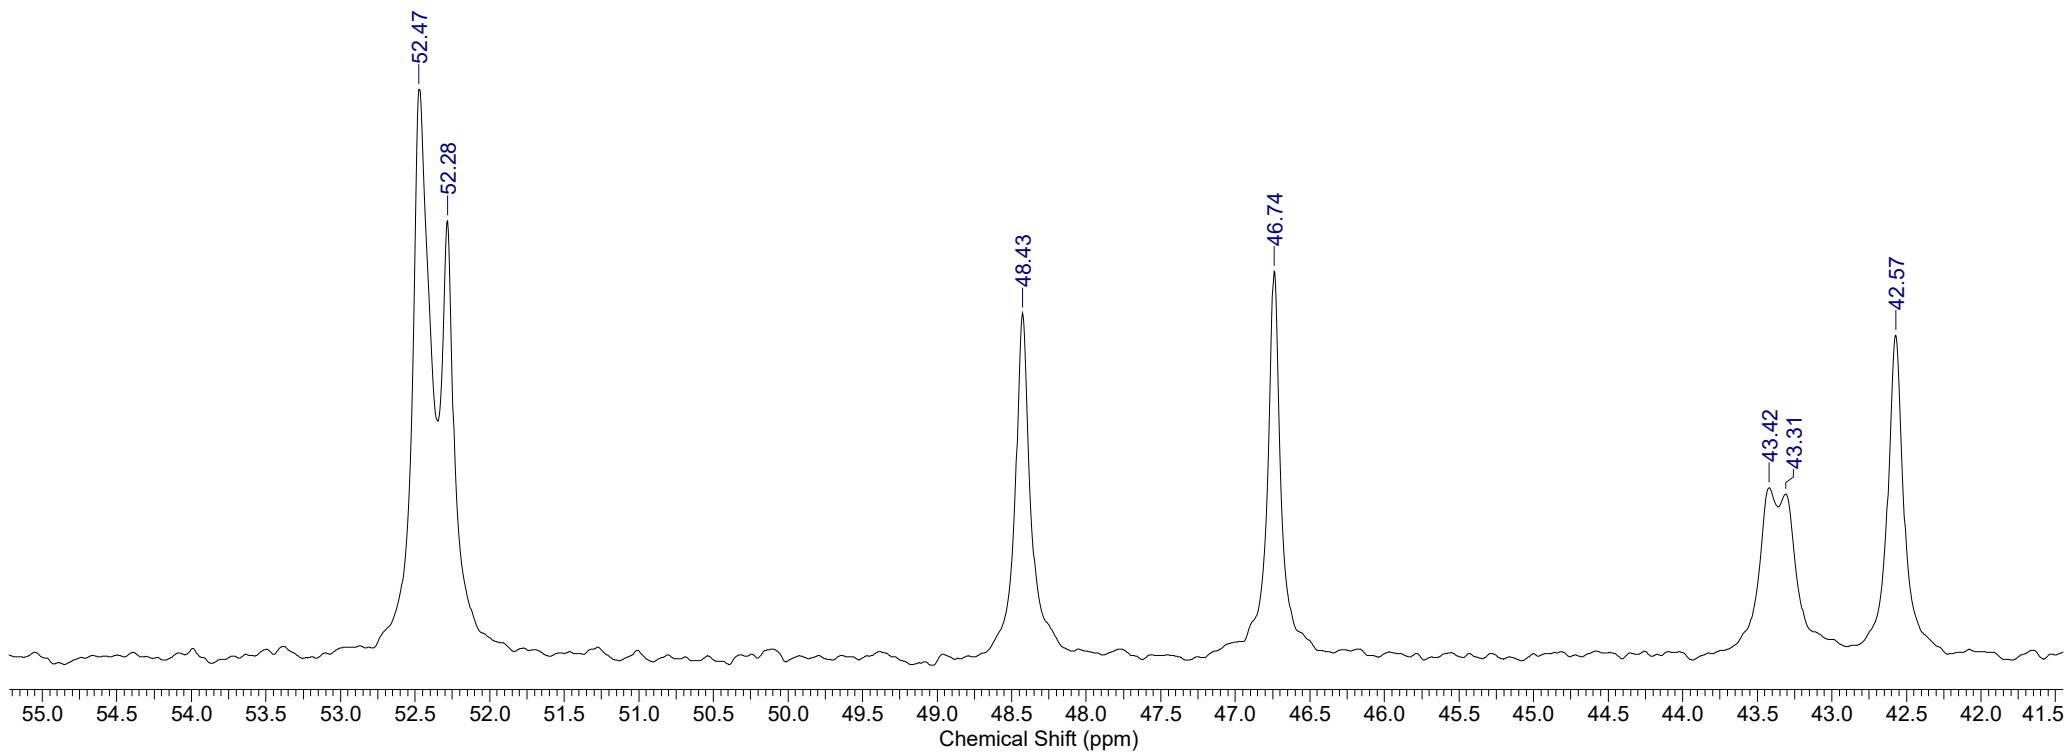

|                                                                               |                    |
|-------------------------------------------------------------------------------|--------------------|
| <b>Formula</b> C <sub>16</sub> H <sub>12</sub> F <sub>3</sub> NO <sub>6</sub> | <b>FW</b> 371.2648 |
|-------------------------------------------------------------------------------|--------------------|

|                                                              |                                    |                                       |                                        |
|--------------------------------------------------------------|------------------------------------|---------------------------------------|----------------------------------------|
| <b>Acquisition Time (sec)</b> 1.9818                         | <b>Comment</b> single_pulse        | <b>Date</b> 25 Aug 2020 09:36:41      | <b>Date Stamp</b> 25 Aug 2020 09:37:56 |
| <b>File Name</b> C:\USERS\Лабa534\DOWNLOADS\FZ9036-1 (1).JDF | <b>Frequency (MHz)</b> 600.17      | <b>Nucleus</b> 1H                     | <b>Number of Transients</b> 8          |
| <b>Origin</b> ECA 600                                        | <b>Original Points Count</b> 32768 | <b>Owner</b> CKP                      | <b>Points Count</b> 32768              |
| <b>Receiver Gain</b> 38.00                                   | <b>Solvent</b> DMSO-d6             | <b>Spectrum Offset (Hz)</b> 5422.7378 | <b>Sweep Width (Hz)</b> 16534.39       |

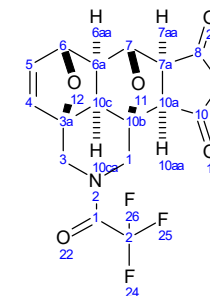

3d

FZ9036-1 (1).JDF

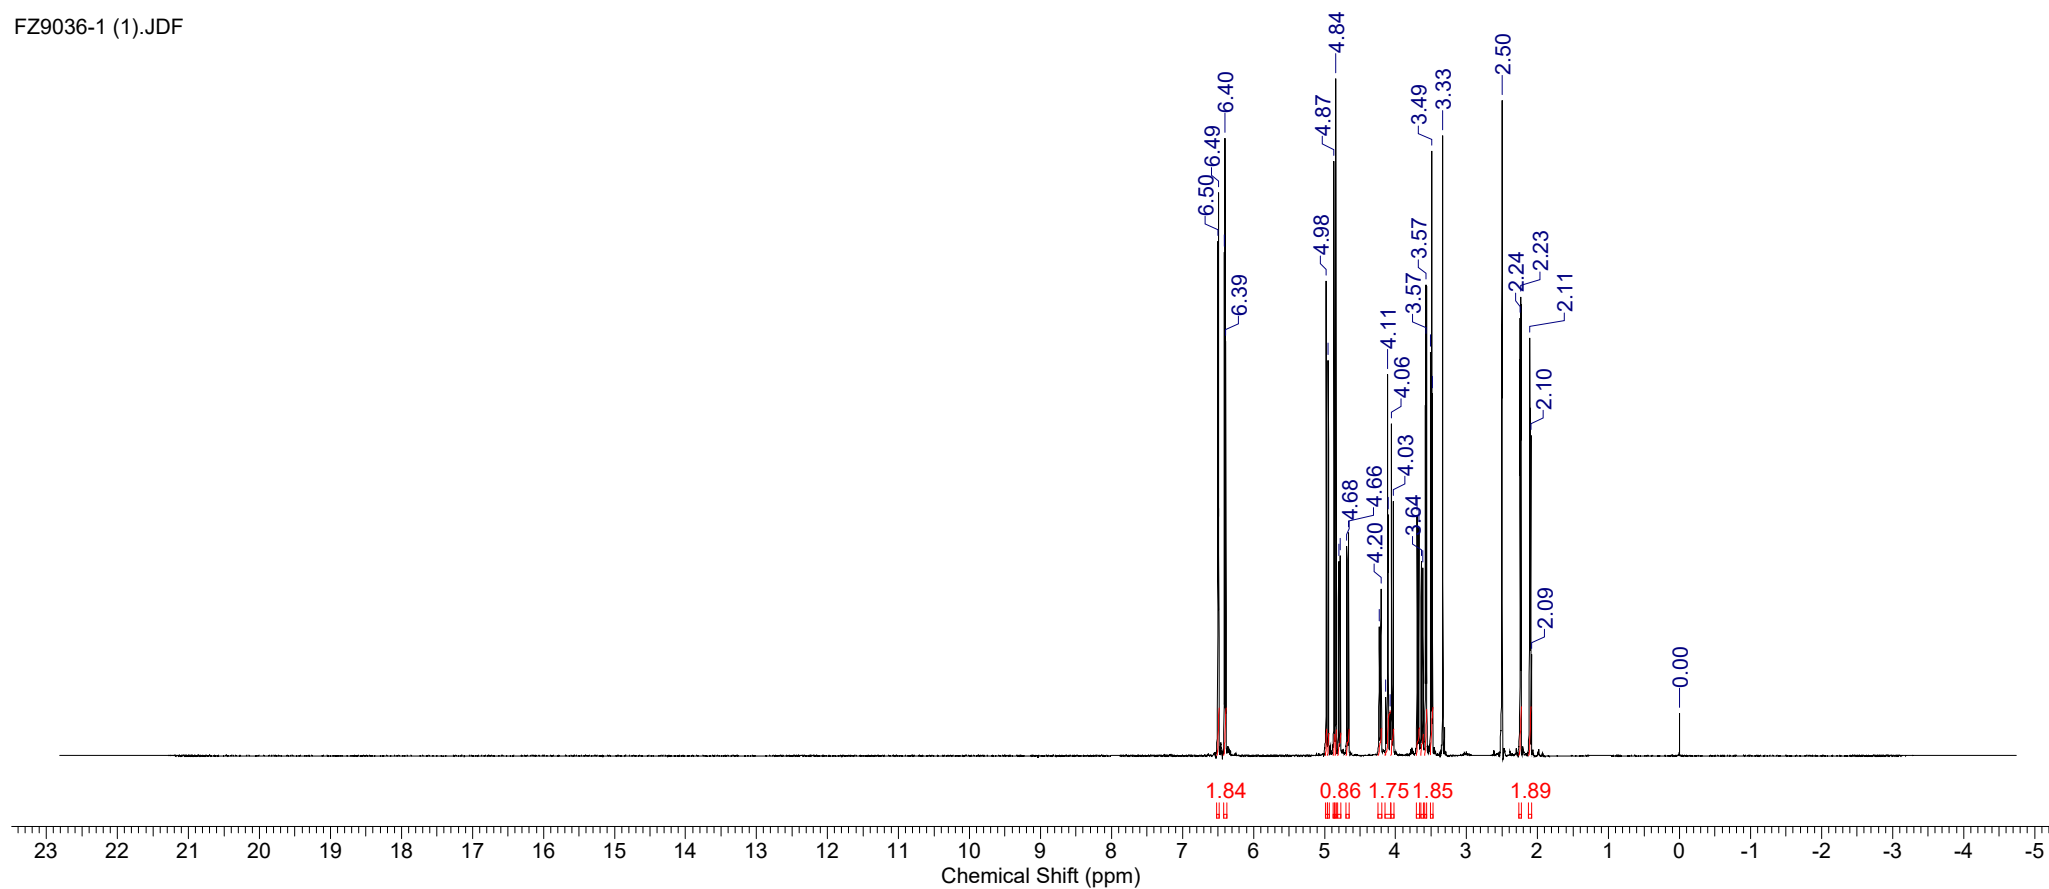

Formula C<sub>16</sub>H<sub>12</sub>F<sub>3</sub>NO<sub>6</sub> FW 371.2648

|                        |                                             |                       |              |                      |                      |                      |                      |
|------------------------|---------------------------------------------|-----------------------|--------------|----------------------|----------------------|----------------------|----------------------|
| Acquisition Time (sec) | 1.9818                                      | Comment               | single_pulse | Date                 | 25 Aug 2020 09:36:41 | Date Stamp           | 25 Aug 2020 09:37:56 |
| File Name              | C:\USERS\Лабa534\DOWNLOADS\FZ9036-1 (1).JDF | Frequency (MHz)       | 600.17       | Nucleus              | 1H                   | Number of Transients | 8                    |
| Origin                 | ECA 600                                     | Original Points Count | 32768        | Owner                | CKP                  | Points Count         | 32768                |
| Receiver Gain          | 38.00                                       | Solvent               | DMSO-d6      | Spectrum Offset (Hz) | 5422.7378            | Sweep Width (Hz)     | 16534.39             |
|                        |                                             |                       |              |                      |                      | Pulse Sequence       | single_pulse.ex2     |

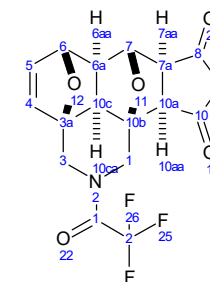

3d

FZ9036-1 (1).JDF

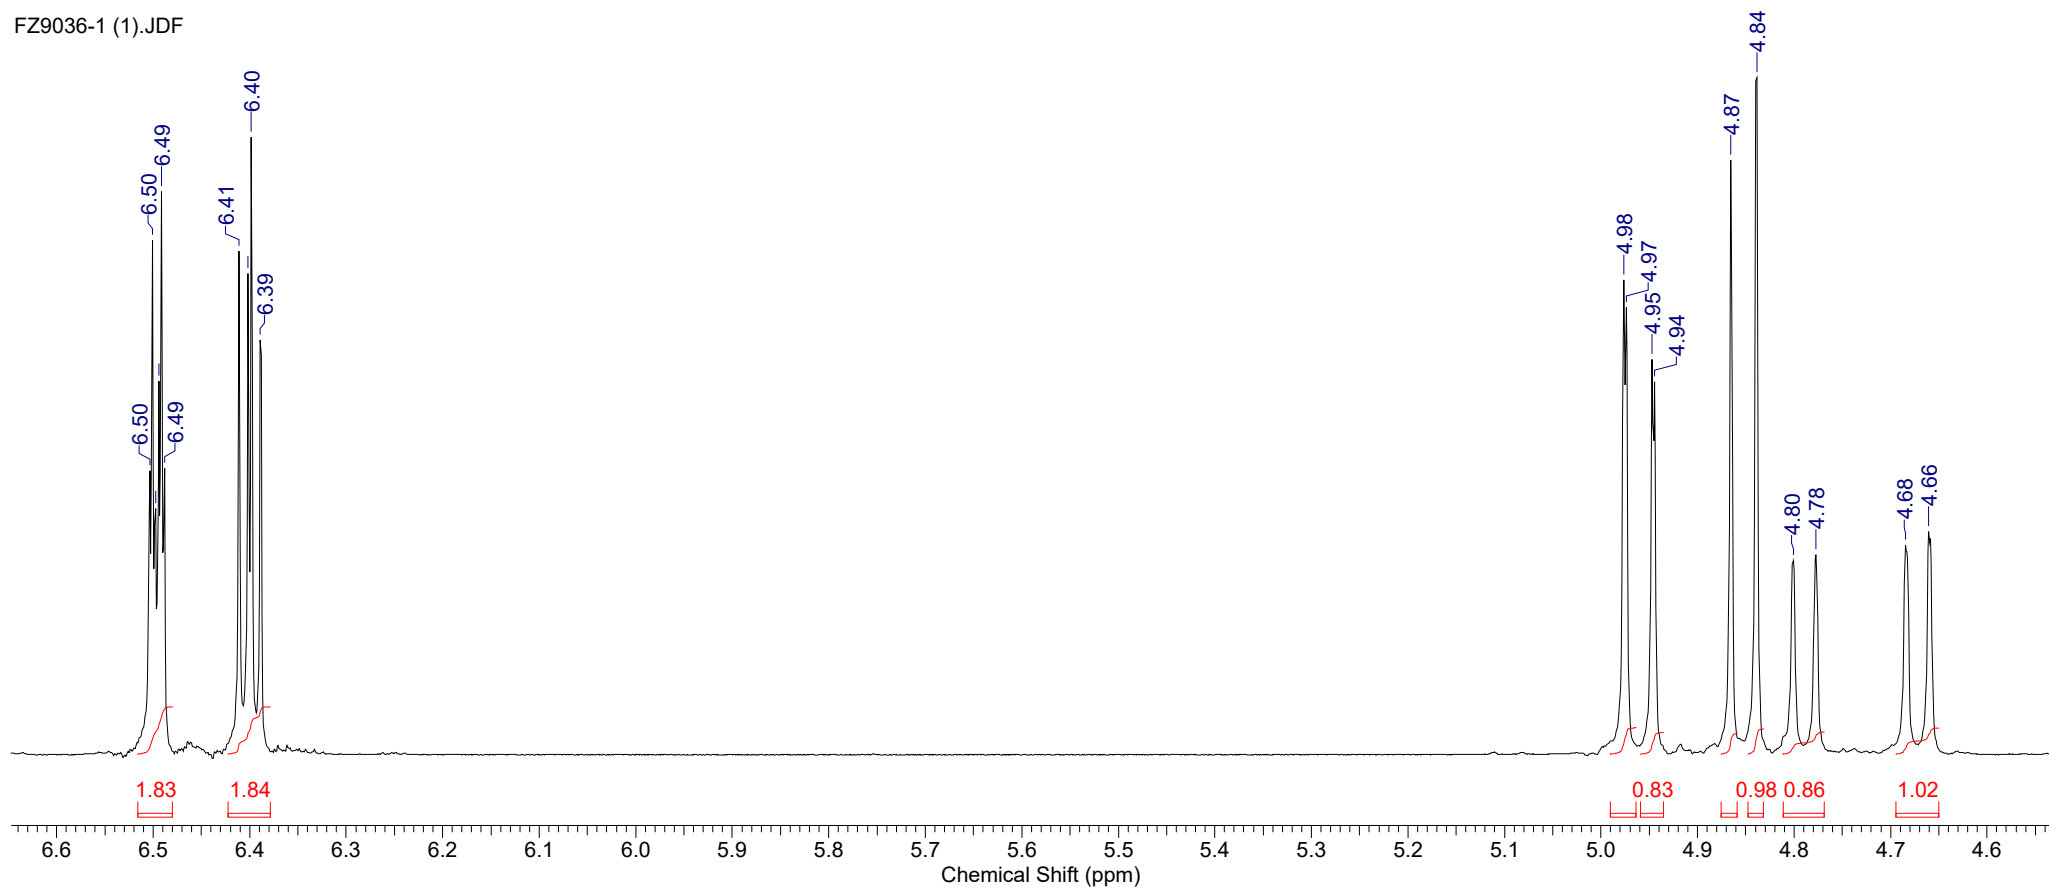

**Formula** C<sub>16</sub>H<sub>12</sub>F<sub>3</sub>NO<sub>6</sub> **FW** 371.2648

|                                                              |                                    |                                       |                                        |
|--------------------------------------------------------------|------------------------------------|---------------------------------------|----------------------------------------|
| <b>Acquisition Time (sec)</b> 1.9818                         | <b>Comment</b> single_pulse        | <b>Date</b> 25 Aug 2020 09:36:41      | <b>Date Stamp</b> 25 Aug 2020 09:37:56 |
| <b>File Name</b> C:\USERS\Лабa534\DOWNLOADS\FZ9036-1 (1).JDF | <b>Frequency (MHz)</b> 600.17      | <b>Nucleus</b> 1H                     | <b>Number of Transients</b> 8          |
| <b>Origin</b> ECA 600                                        | <b>Original Points Count</b> 32768 | <b>Owner</b> CKP                      | <b>Points Count</b> 32768              |
| <b>Receiver Gain</b> 38.00                                   | <b>Solvent</b> DMSO-d6             | <b>Spectrum Offset (Hz)</b> 5422.7378 | <b>Sweep Width (Hz)</b> 16534.39       |

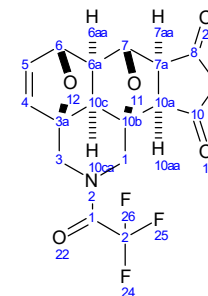

FZ9036-1 (1).JDF

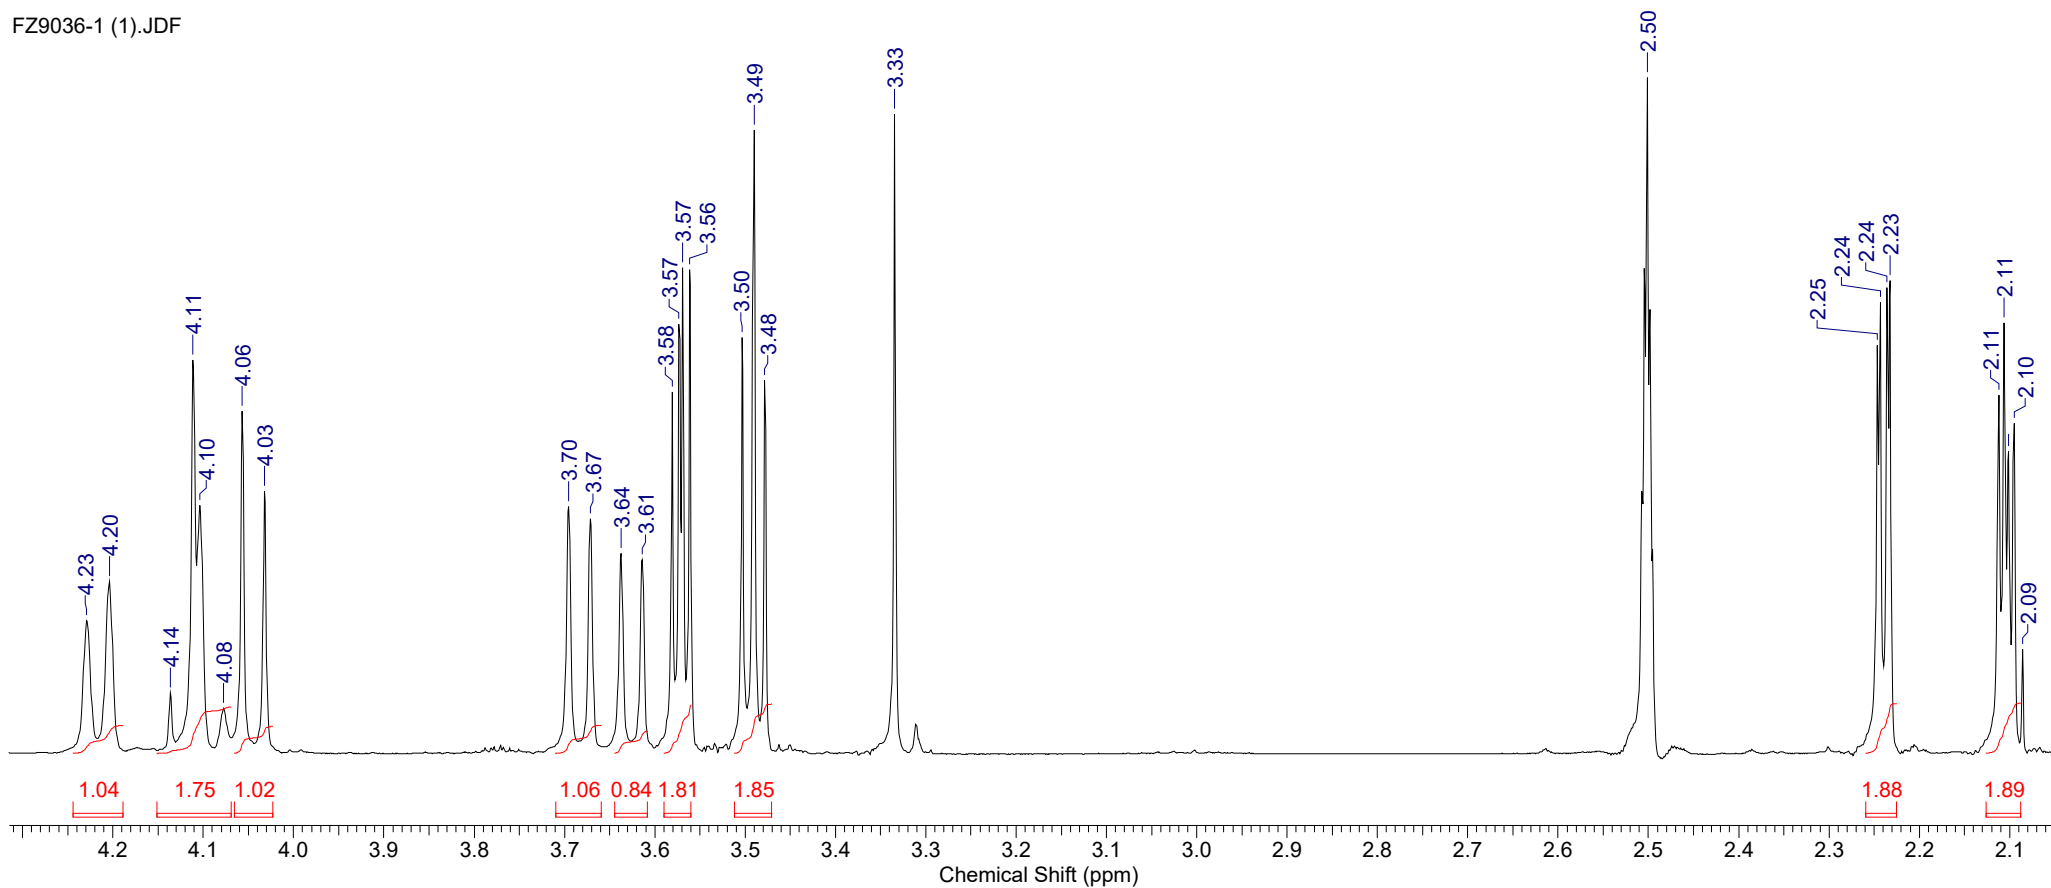

|                                                                               |                    |
|-------------------------------------------------------------------------------|--------------------|
| <b>Formula</b> C <sub>16</sub> H <sub>12</sub> F <sub>3</sub> NO <sub>6</sub> | <b>FW</b> 371.2648 |
|-------------------------------------------------------------------------------|--------------------|

|                                        |                                                           |                                    |
|----------------------------------------|-----------------------------------------------------------|------------------------------------|
| <b>Acquisition Time (sec)</b> 0.6921   | <b>Comment</b> single pulse decoupled gated NOE           | <b>Date</b> 25 Aug 2020 10:22:15   |
| <b>Date Stamp</b> 25 Aug 2020 10:23:30 | <b>File Name</b> C:\USERS\lpa6a534\DOWNLOADS\FZ9036-2.JDF | <b>Frequency (MHz)</b> 150.91      |
| <b>Nucleus</b> 13C                     | <b>Number of Transients</b> 2744                          | <b>Origin</b> ECA 600              |
| <b>Points Count</b> 32768              | <b>Pulse Sequence</b> single pulse dec                    | <b>Original Points Count</b> 32768 |
| <b>Spectrum Offset (Hz)</b> 15091.3428 | <b>Sweep Width (Hz)</b> 47348.49                          | <b>Receiver Gain</b> 58.00         |
|                                        |                                                           | <b>Solvent</b> DMSO-d6             |

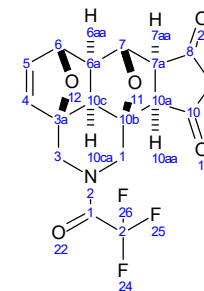

3d

FZ9036-2 3D-13C.ESP

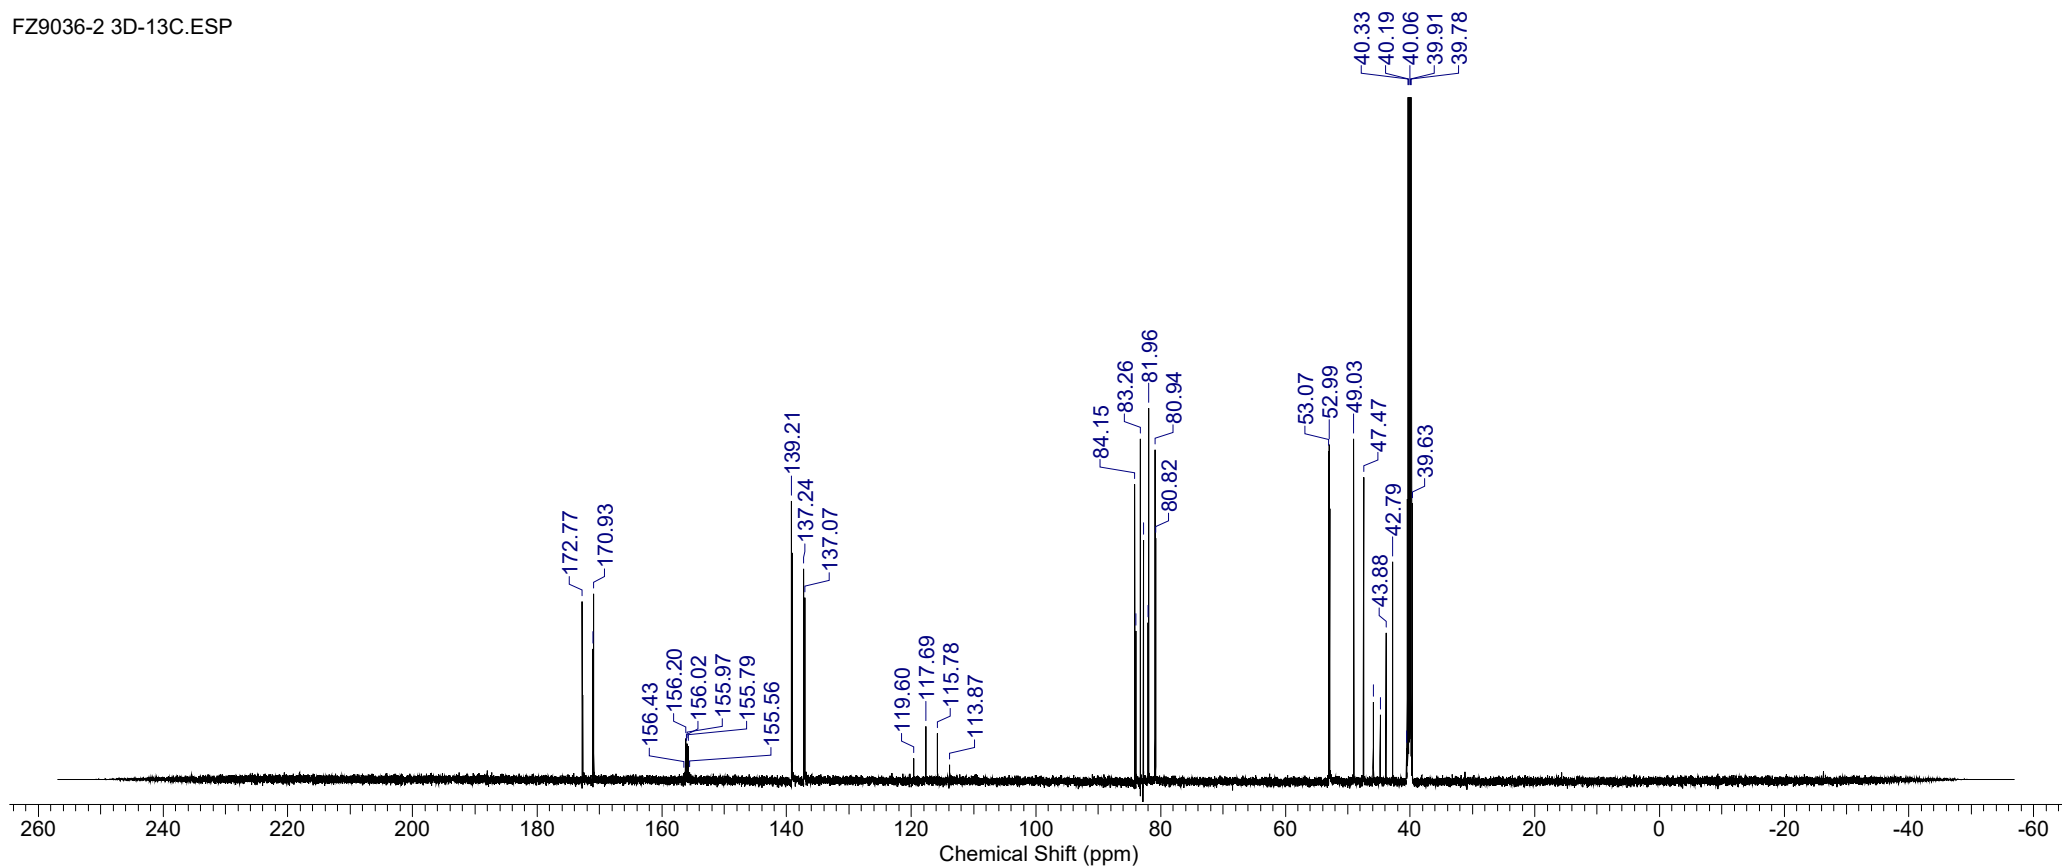

|                                                                               |                    |
|-------------------------------------------------------------------------------|--------------------|
| <b>Formula</b> C <sub>16</sub> H <sub>12</sub> F <sub>3</sub> NO <sub>6</sub> | <b>FW</b> 371.2648 |
|-------------------------------------------------------------------------------|--------------------|

|                                        |                                                           |                                    |
|----------------------------------------|-----------------------------------------------------------|------------------------------------|
| <b>Acquisition Time (sec)</b> 0.6921   | <b>Comment</b> single pulse decoupled gated NOE           | <b>Date</b> 25 Aug 2020 10:22:15   |
| <b>Date Stamp</b> 25 Aug 2020 10:23:30 | <b>File Name</b> C:\USERS\lta6a534\DOWNLOADS\FZ9036-2.JDF | <b>Frequency (MHz)</b> 150.91      |
| <b>Nucleus</b> 13C                     | <b>Number of Transients</b> 2744                          | <b>Origin</b> ECA 600              |
| <b>Points Count</b> 32768              | <b>Pulse Sequence</b> single pulse dec                    | <b>Original Points Count</b> 32768 |
| <b>Spectrum Offset (Hz)</b> 15091.3428 | <b>Sweep Width (Hz)</b> 47348.49                          | <b>Receiver Gain</b> 58.00         |
|                                        |                                                           | <b>Solvent</b> DMSO-d6             |

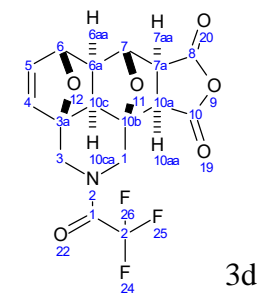

FZ9036-2 3D-13C.ESP

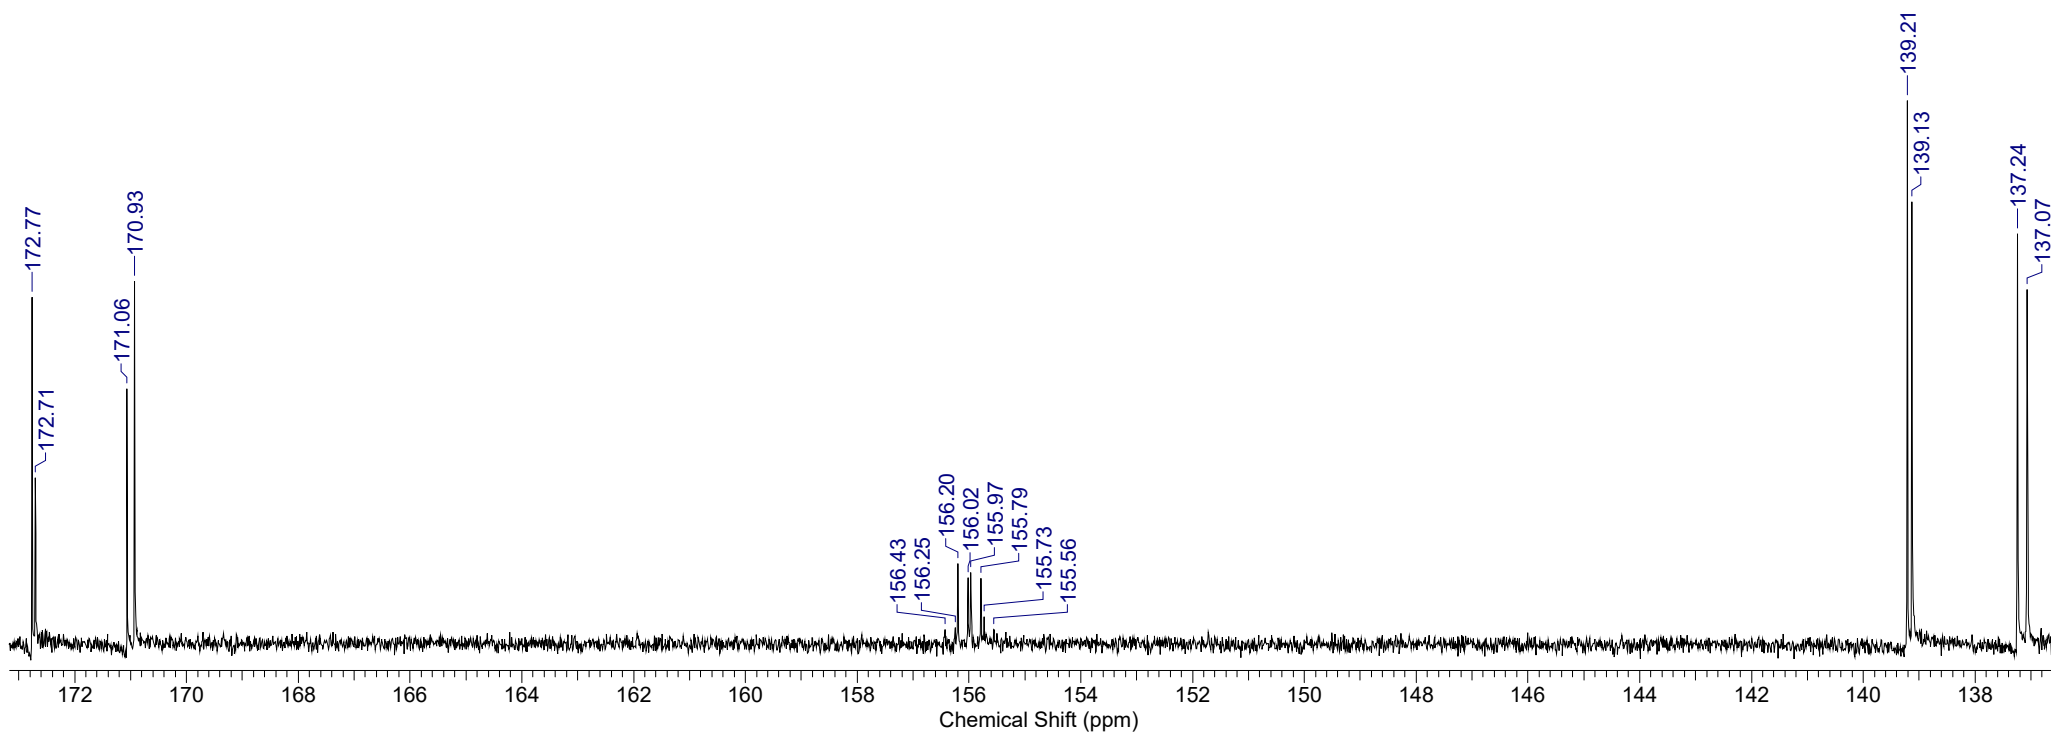

|                                                                               |                    |
|-------------------------------------------------------------------------------|--------------------|
| <b>Formula</b> C <sub>16</sub> H <sub>12</sub> F <sub>3</sub> NO <sub>6</sub> | <b>FW</b> 371.2648 |
|-------------------------------------------------------------------------------|--------------------|

|                                        |                                                           |                                    |
|----------------------------------------|-----------------------------------------------------------|------------------------------------|
| <b>Acquisition Time (sec)</b> 0.6921   | <b>Comment</b> single pulse decoupled gated NOE           | <b>Date</b> 25 Aug 2020 10:22:15   |
| <b>Date Stamp</b> 25 Aug 2020 10:23:30 | <b>File Name</b> C:\USERS\lpa6a534\DOWNLOADS\FZ9036-2.JDF | <b>Frequency (MHz)</b> 150.91      |
| <b>Nucleus</b> 13C                     | <b>Number of Transients</b> 2744                          | <b>Origin</b> ECA 600              |
| <b>Points Count</b> 32768              | <b>Pulse Sequence</b> single pulse dec                    | <b>Original Points Count</b> 32768 |
| <b>Spectrum Offset (Hz)</b> 15091.3428 | <b>Sweep Width (Hz)</b> 47348.49                          | <b>Receiver Gain</b> 58.00         |
|                                        |                                                           | <b>Solvent</b> DMSO-d6             |

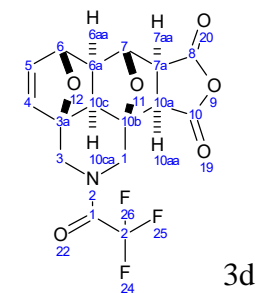

FZ9036-2 3D-13C.ESP

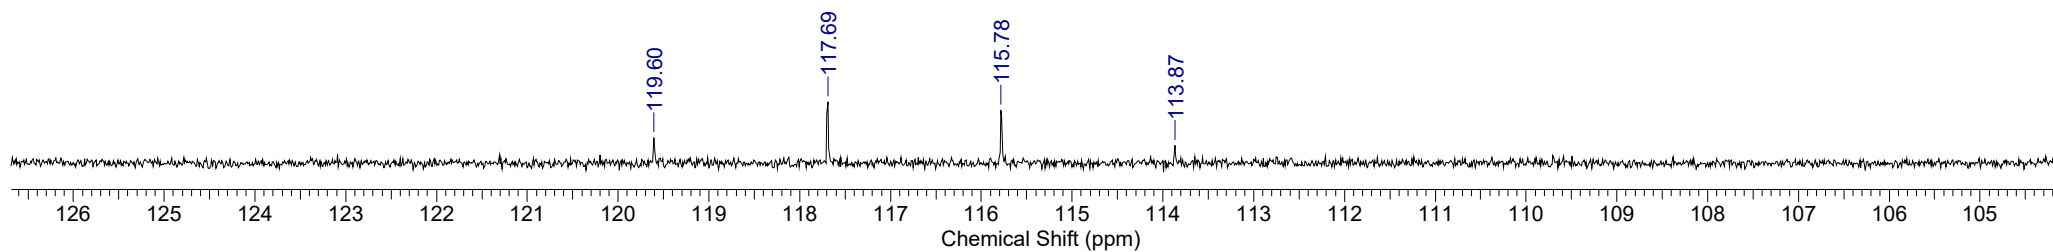

|                                                                               |                    |
|-------------------------------------------------------------------------------|--------------------|
| <b>Formula</b> C <sub>16</sub> H <sub>12</sub> F <sub>3</sub> NO <sub>6</sub> | <b>FW</b> 371.2648 |
|-------------------------------------------------------------------------------|--------------------|

|                                        |                                                           |                                    |
|----------------------------------------|-----------------------------------------------------------|------------------------------------|
| <b>Acquisition Time (sec)</b> 0.6921   | <b>Comment</b> single pulse decoupled gated NOE           | <b>Date</b> 25 Aug 2020 10:22:15   |
| <b>Date Stamp</b> 25 Aug 2020 10:23:30 | <b>File Name</b> C:\USERS\lta6a534\DOWNLOADS\FZ9036-2.JDF | <b>Frequency (MHz)</b> 150.91      |
| <b>Nucleus</b> 13C                     | <b>Number of Transients</b> 2744                          | <b>Origin</b> ECA 600              |
| <b>Points Count</b> 32768              | <b>Pulse Sequence</b> single pulse dec                    | <b>Original Points Count</b> 32768 |
| <b>Spectrum Offset (Hz)</b> 15091.3428 | <b>Sweep Width (Hz)</b> 47348.49                          | <b>Receiver Gain</b> 58.00         |
|                                        |                                                           | <b>Owner</b> CKP                   |
|                                        |                                                           | <b>Solvent</b> DMSO-d6             |

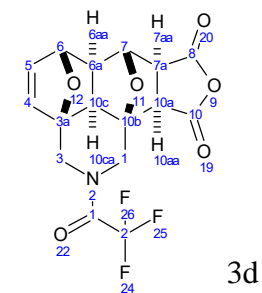

FZ9036-2 3D-13C.ESP

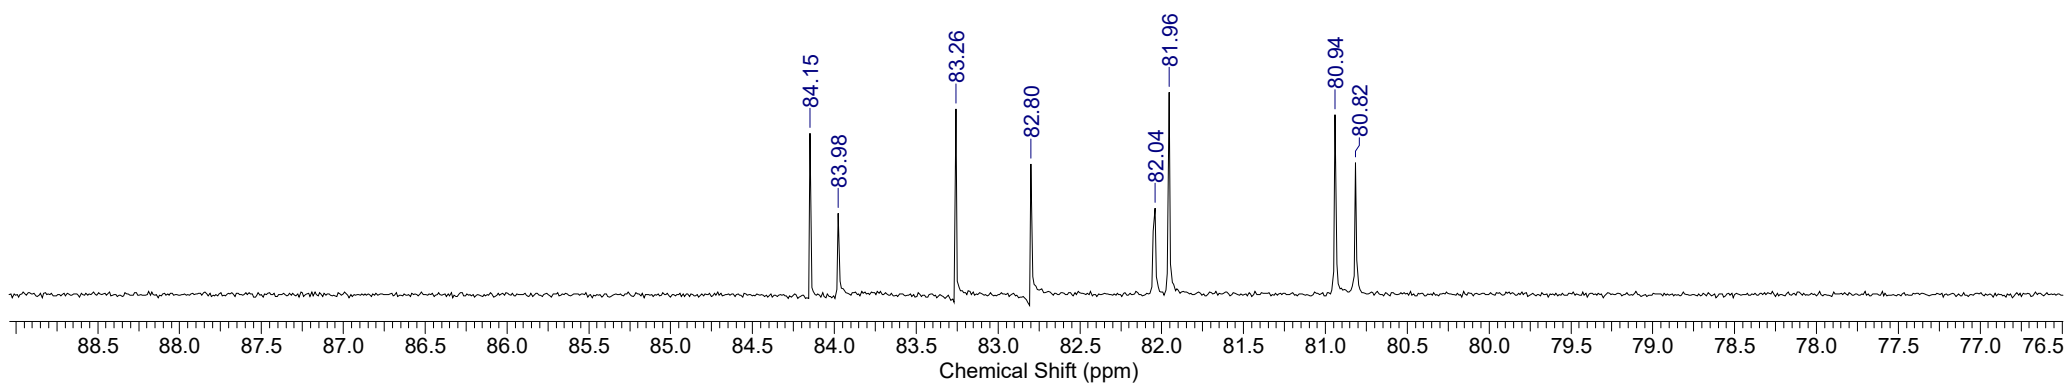



|                                                                               |                    |
|-------------------------------------------------------------------------------|--------------------|
| <b>Formula</b> C <sub>16</sub> H <sub>12</sub> F <sub>3</sub> NO <sub>6</sub> | <b>FW</b> 371.2648 |
|-------------------------------------------------------------------------------|--------------------|

|                                        |                                                           |                                    |
|----------------------------------------|-----------------------------------------------------------|------------------------------------|
| <b>Acquisition Time (sec)</b> 0.6921   | <b>Comment</b> single pulse decoupled gated NOE           | <b>Date</b> 25 Aug 2020 10:22:15   |
| <b>Date Stamp</b> 25 Aug 2020 10:23:30 | <b>File Name</b> C:\USERS\lta6a534\DOWNLOADS\FZ9036-2.JDF | <b>Frequency (MHz)</b> 150.91      |
| <b>Nucleus</b> 13C                     | <b>Number of Transients</b> 2744                          | <b>Origin</b> ECA 600              |
| <b>Points Count</b> 32768              | <b>Pulse Sequence</b> single pulse dec                    | <b>Original Points Count</b> 32768 |
| <b>Spectrum Offset (Hz)</b> 15091.3428 | <b>Sweep Width (Hz)</b> 47348.49                          | <b>Receiver Gain</b> 58.00         |
|                                        |                                                           | <b>Solvent</b> DMSO-d6             |

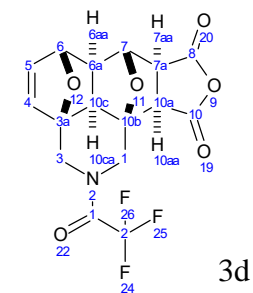

FZ9036-2 3D-13C.ESP

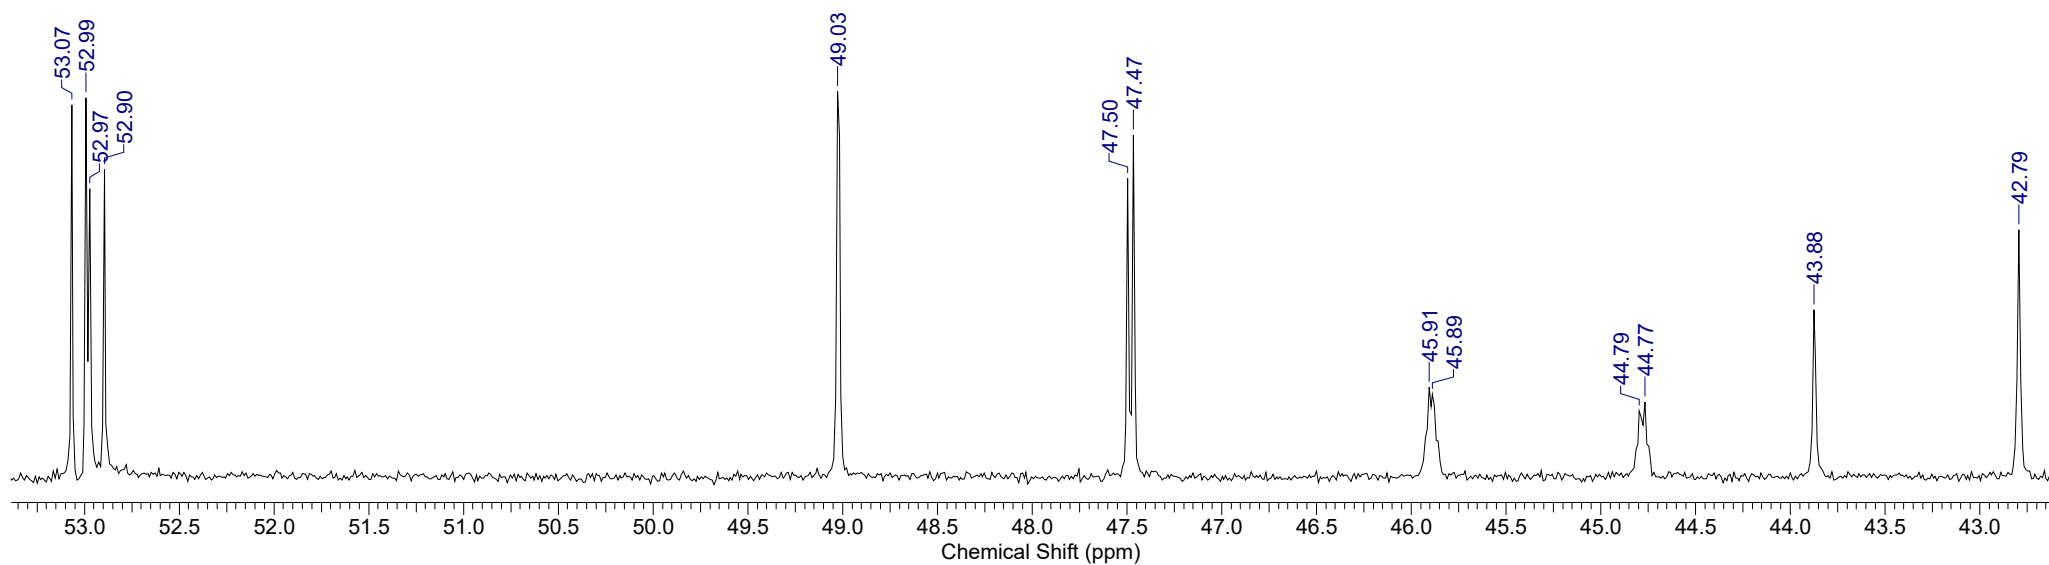

|                                                                               |                    |
|-------------------------------------------------------------------------------|--------------------|
| <b>Formula</b> C <sub>16</sub> H <sub>12</sub> F <sub>3</sub> NO <sub>6</sub> | <b>FW</b> 371.2648 |
|-------------------------------------------------------------------------------|--------------------|

|                                                          |                                    |                                         |                                        |
|----------------------------------------------------------|------------------------------------|-----------------------------------------|----------------------------------------|
| <b>Acquisition Time (sec)</b> 0.4614                     | <b>Comment</b> single_pulse        | <b>Date</b> 25 Aug 2020 10:24:17        | <b>Date Stamp</b> 25 Aug 2020 10:25:32 |
| <b>File Name</b> C:\USERS\Лабa534\DOWNLOADS\FZ9036-3.JDF | <b>Frequency (MHz)</b> 564.73      | <b>Nucleus</b> 19F                      | <b>Number of Transients</b> 8          |
| <b>Origin</b> ECA 600                                    | <b>Original Points Count</b> 65536 | <b>Owner</b> CKP                        | <b>Points Count</b> 65536              |
| <b>Receiver Gain</b> 44.00                               | <b>Solvent</b> DMSO-d6             | <b>Spectrum Offset (Hz)</b> -56472.6094 | <b>Sweep Width (Hz)</b> 142045.45      |

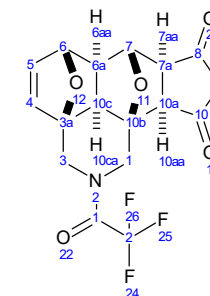

3d

FZ9036-3.JDF

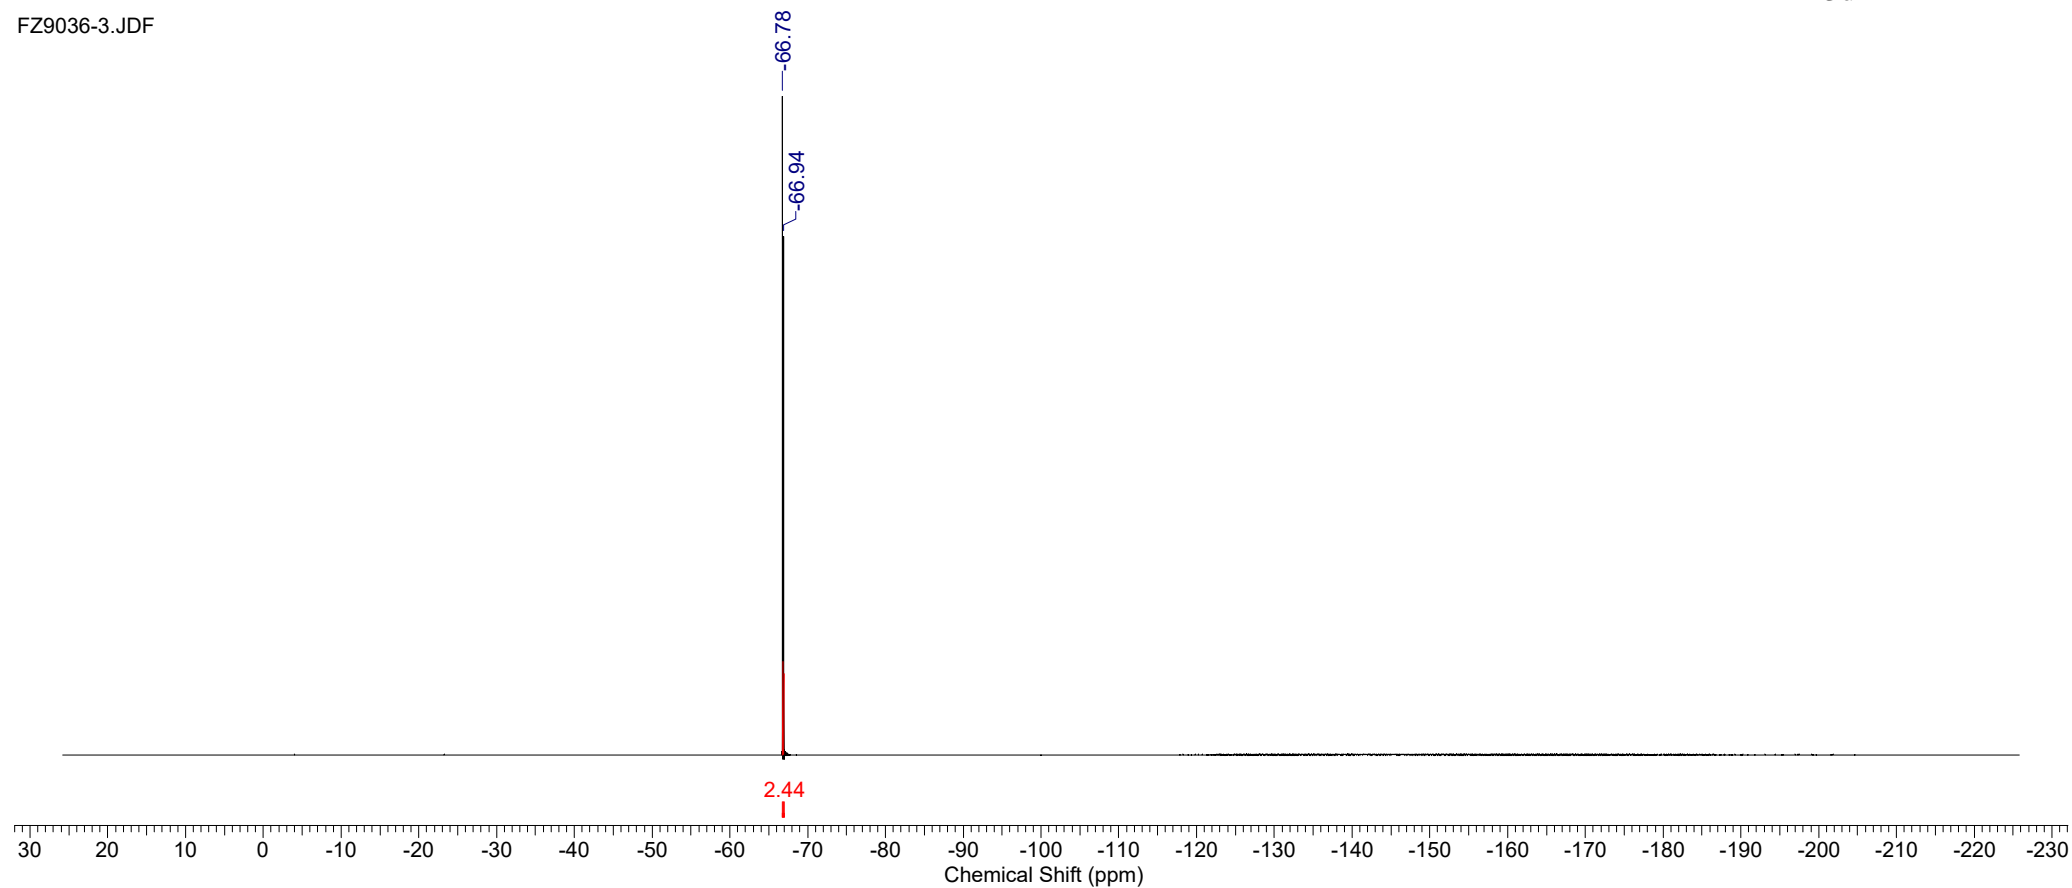

|                                                                               |                    |
|-------------------------------------------------------------------------------|--------------------|
| <b>Formula</b> C <sub>16</sub> H <sub>12</sub> F <sub>3</sub> NO <sub>6</sub> | <b>FW</b> 371.2648 |
|-------------------------------------------------------------------------------|--------------------|

|                                                          |                                    |                                         |                                        |
|----------------------------------------------------------|------------------------------------|-----------------------------------------|----------------------------------------|
| <b>Acquisition Time (sec)</b> 0.4614                     | <b>Comment</b> single_pulse        | <b>Date</b> 25 Aug 2020 10:24:17        | <b>Date Stamp</b> 25 Aug 2020 10:25:32 |
| <b>File Name</b> C:\USERS\Лабa534\DOWNLOADS\FZ9036-3.JDF | <b>Frequency (MHz)</b> 564.73      | <b>Nucleus</b> 19F                      | <b>Number of Transients</b> 8          |
| <b>Origin</b> ECA 600                                    | <b>Original Points Count</b> 65536 | <b>Owner</b> CKP                        | <b>Points Count</b> 65536              |
| <b>Receiver Gain</b> 44.00                               | <b>Solvent</b> DMSO-d6             | <b>Spectrum Offset (Hz)</b> -56472.6094 | <b>Sweep Width (Hz)</b> 142045.45      |
|                                                          |                                    |                                         | <b>Pulse Sequence</b> single_pulse.ex2 |

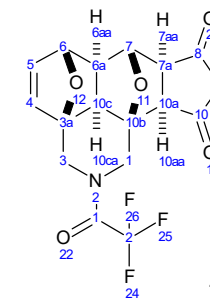

FZ9036-3.JDF

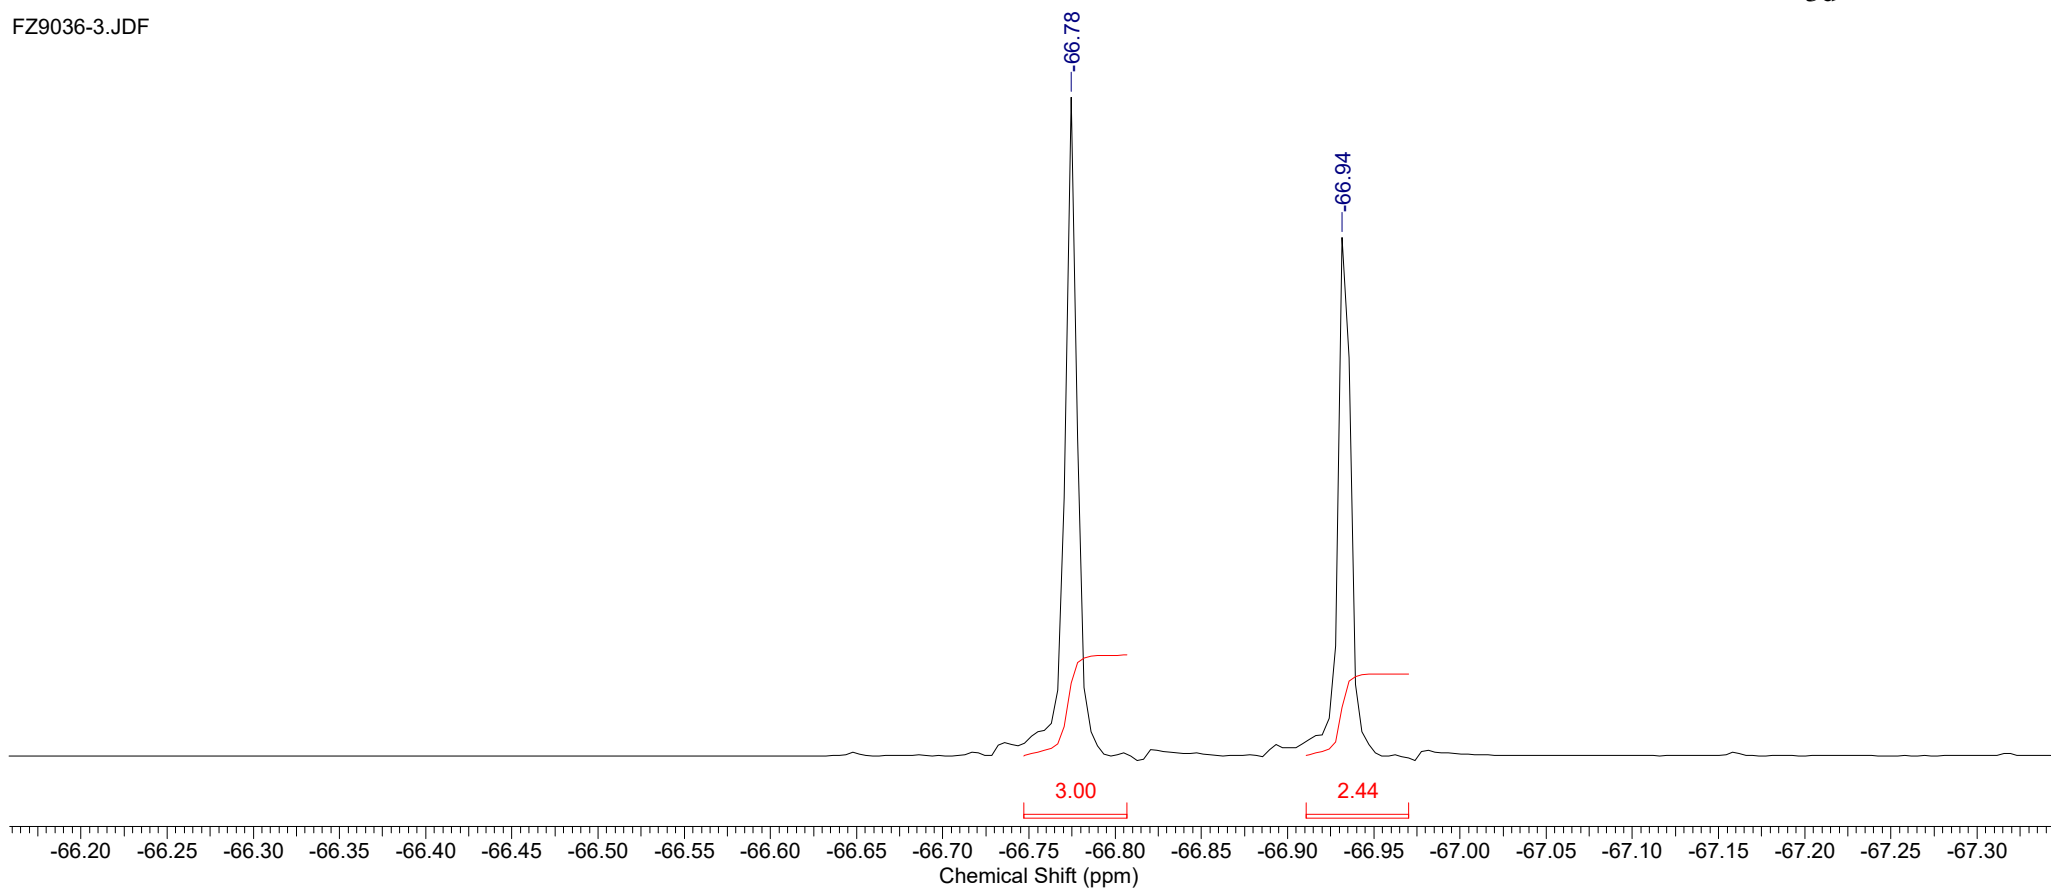

|                                                                |                    |
|----------------------------------------------------------------|--------------------|
| <b>Formula</b> C <sub>21</sub> H <sub>17</sub> NO <sub>6</sub> | <b>FW</b> 379.3628 |
|----------------------------------------------------------------|--------------------|

|                                        |                                                           |                                      |                               |
|----------------------------------------|-----------------------------------------------------------|--------------------------------------|-------------------------------|
| <b>Acquisition Time (sec)</b> 1.4549   | <b>Comment</b> single pulse                               | <b>Date</b> 01 Nov 2012 13:57:59     | <b>Frequency (MHz)</b> 600.17 |
| <b>Date Stamp</b> 01 Nov 2012 13:10:57 | <b>File Name</b> C:\USERS\Лаб6а534\DOWNLOADS\FZ2562-1.JDF | <b>Original Points Count</b> 16384   | <b>Owner</b> delta            |
| <b>Nucleus</b> 1H                      | <b>Number of Transients</b> 16                            | <b>Origin</b> ECA 600                | <b>Receiver Gain</b> 42.00    |
| <b>Points Count</b> 16384              | <b>Pulse Sequence</b> single_pulse.ex2                    | <b>Temperature (degree C)</b> 21.100 | <b>Solvent</b> DMSO-d6        |
| <b>Spectrum Offset (Hz)</b> 3620.6384  | <b>Sweep Width (Hz)</b> 11261.26                          |                                      |                               |

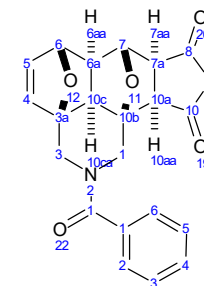

3e

FZ2562-1 бензил с МА 1Н.ESP

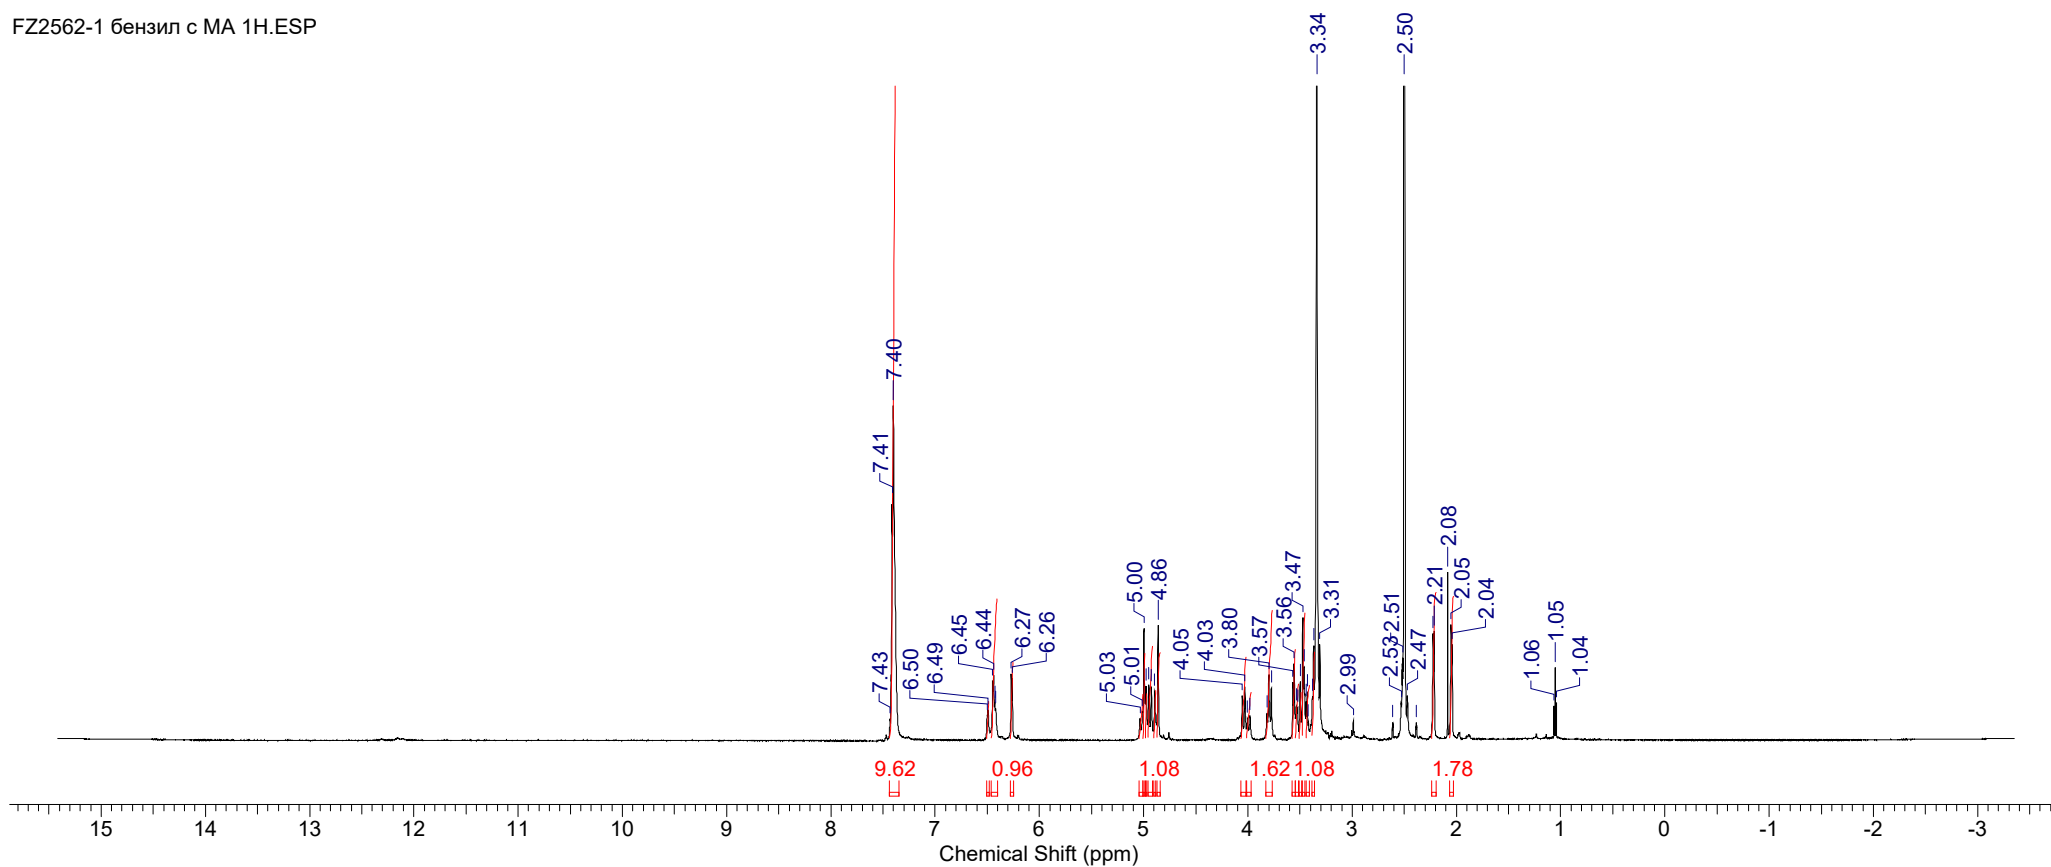

|                                                                |                    |
|----------------------------------------------------------------|--------------------|
| <b>Formula</b> C <sub>21</sub> H <sub>17</sub> NO <sub>6</sub> | <b>FW</b> 379.3628 |
|----------------------------------------------------------------|--------------------|

|                                        |                                                           |                                      |                               |
|----------------------------------------|-----------------------------------------------------------|--------------------------------------|-------------------------------|
| <b>Acquisition Time (sec)</b> 1.4549   | <b>Comment</b> single pulse                               | <b>Date</b> 01 Nov 2012 13:57:59     | <b>Frequency (MHz)</b> 600.17 |
| <b>Date Stamp</b> 01 Nov 2012 13:10:57 | <b>File Name</b> C:\USERS\Л\а6а534\DOWNLOADS\FZ2562-1.JDF | <b>Original Points Count</b> 16384   | <b>Owner</b> delta            |
| <b>Nucleus</b> 1H                      | <b>Number of Transients</b> 16                            | <b>Origin</b> ECA 600                | <b>Receiver Gain</b> 42.00    |
| <b>Points Count</b> 16384              | <b>Pulse Sequence</b> single_pulse.ex2                    | <b>Temperature (degree C)</b> 21.100 | <b>Solvent</b> DMSO-d6        |
| <b>Spectrum Offset (Hz)</b> 3620.6384  | <b>Sweep Width (Hz)</b> 11261.26                          |                                      |                               |



3e

FZ2562-1 бензил с МА 1H.ESP

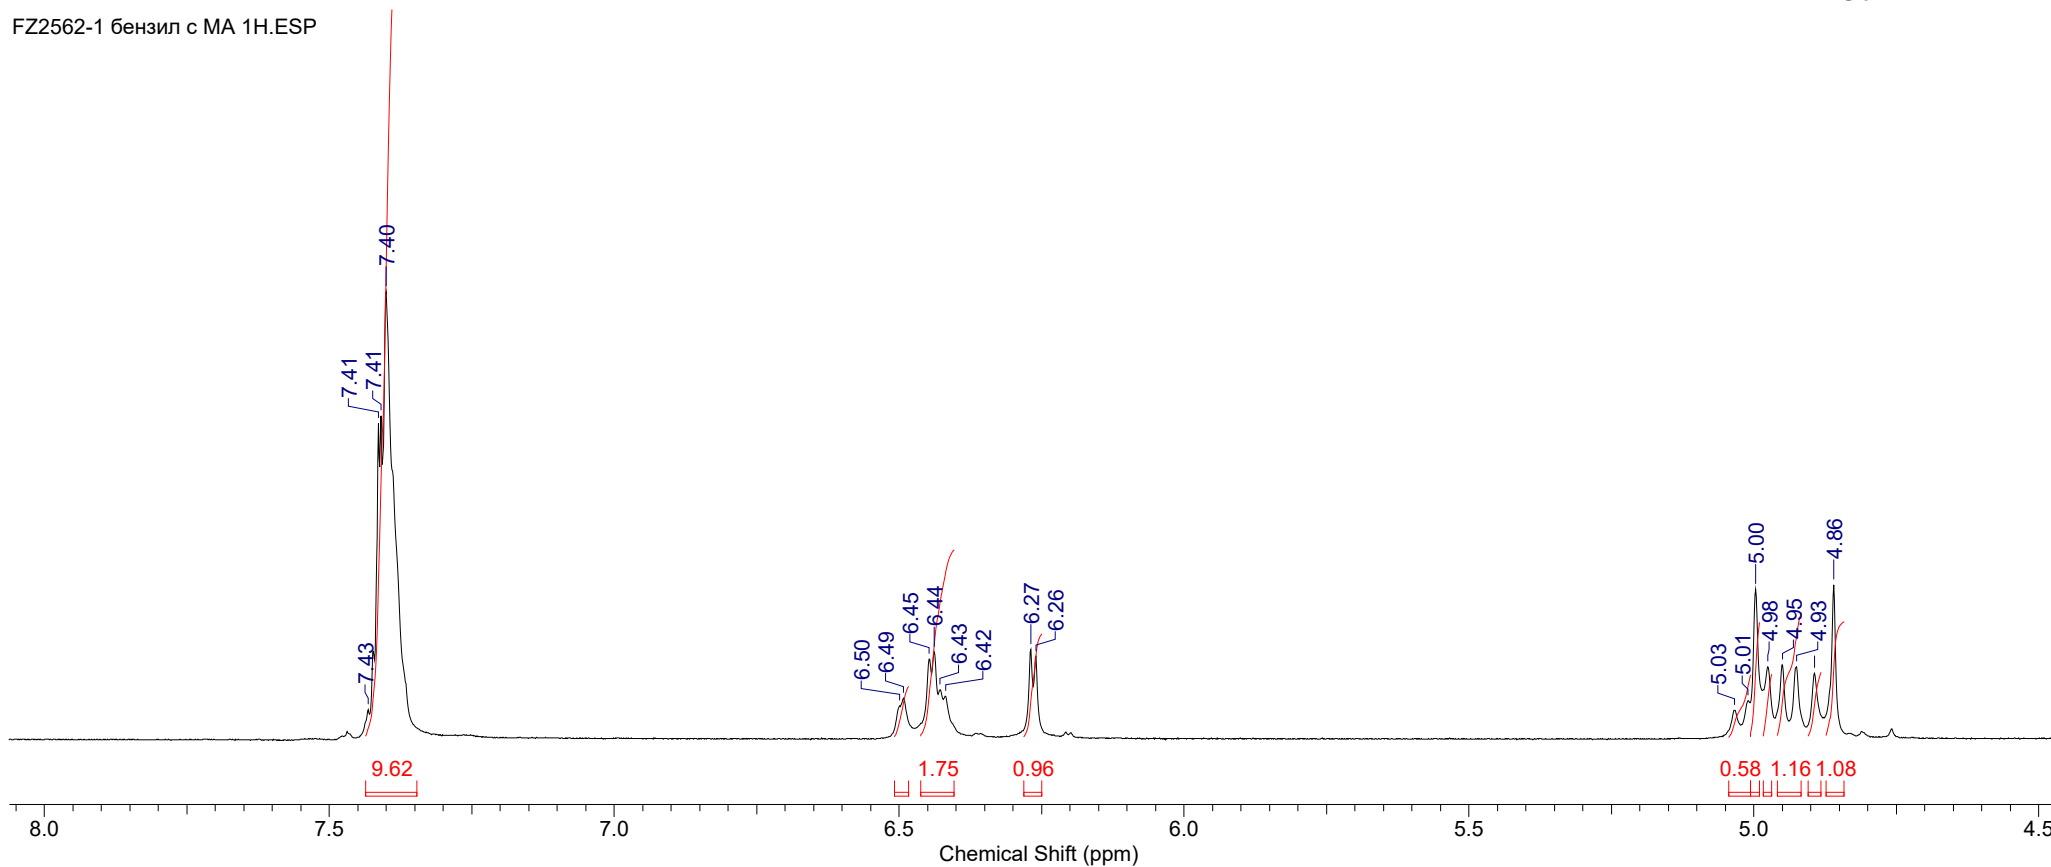

|                                                                |                    |
|----------------------------------------------------------------|--------------------|
| <b>Formula</b> C <sub>21</sub> H <sub>17</sub> NO <sub>6</sub> | <b>FW</b> 379.3628 |
|----------------------------------------------------------------|--------------------|

|                                        |                                        |                                                           |                                    |
|----------------------------------------|----------------------------------------|-----------------------------------------------------------|------------------------------------|
| <b>Acquisition Time (sec)</b> 1.4549   | <b>Comment</b> single pulse            | <b>Date</b> 01 Nov 2012 13:57:59                          |                                    |
| <b>Date Stamp</b> 01 Nov 2012 13:10:57 |                                        | <b>File Name</b> C:\USERS\Лга6а534\DOWNLOADS\FZ2562-1.JDF | <b>Frequency (MHz)</b> 600.17      |
| <b>Nucleus</b> 1H                      | <b>Number of Transients</b> 16         | <b>Origin</b> ECA 600                                     | <b>Original Points Count</b> 16384 |
| <b>Points Count</b> 16384              | <b>Pulse Sequence</b> single_pulse.ex2 |                                                           | <b>Receiver Gain</b> 42.00         |
| <b>Spectrum Offset (Hz)</b> 3620.6384  | <b>Sweep Width (Hz)</b> 11261.26       | <b>Temperature (degree C)</b> 21.100                      | <b>Owner</b> delta                 |
|                                        |                                        |                                                           | <b>Solvent</b> DMSO-d6             |



3e

FZ2562-1 бензил с МА 1H.ESP

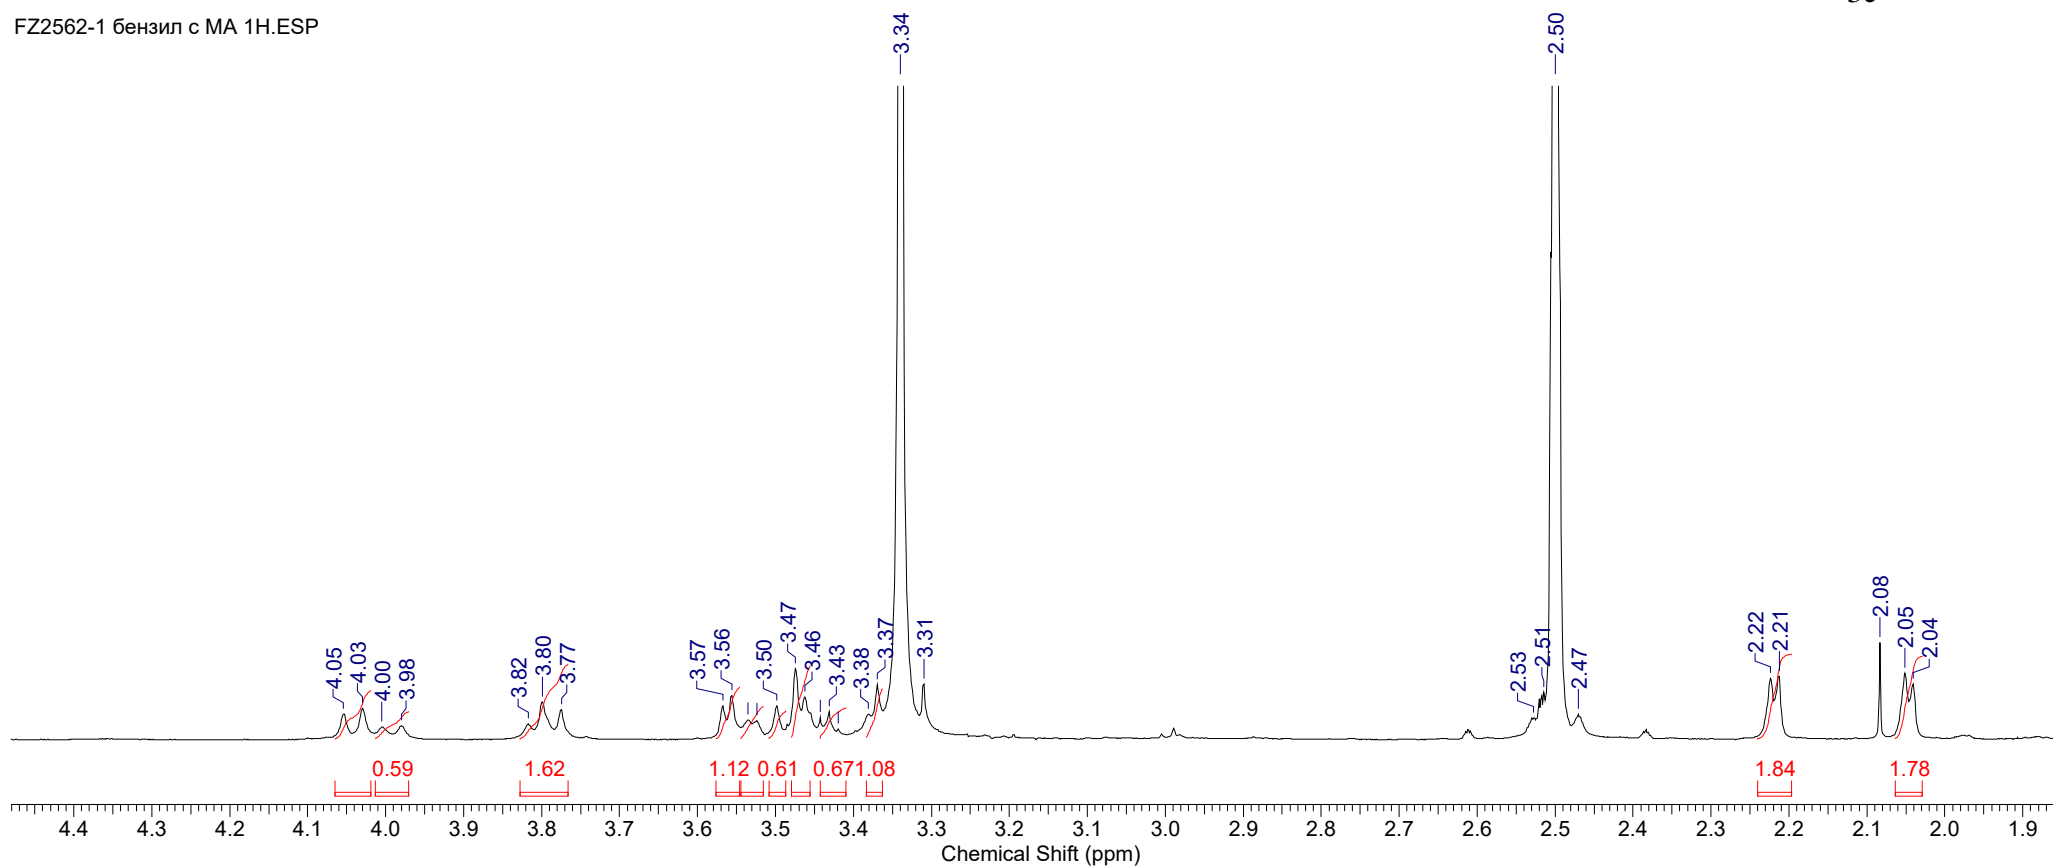

|                                                                |                    |
|----------------------------------------------------------------|--------------------|
| <b>Formula</b> C <sub>21</sub> H <sub>17</sub> NO <sub>6</sub> | <b>FW</b> 379.3628 |
|----------------------------------------------------------------|--------------------|

|                                        |                                                           |                                    |
|----------------------------------------|-----------------------------------------------------------|------------------------------------|
| <b>Acquisition Time (sec)</b> 0.6921   | <b>Comment</b> single pulse decoupled gated NOE           | <b>Date</b> 28 Aug 2020 12:38:22   |
| <b>Date Stamp</b> 28 Aug 2020 12:39:42 | <b>File Name</b> C:\USERS\lta6a534\DOWNLOADS\FZ9062-2.JDF | <b>Frequency (MHz)</b> 150.91      |
| <b>Nucleus</b> 13C                     | <b>Number of Transients</b> 1000                          | <b>Origin</b> ECA 600              |
| <b>Points Count</b> 32768              | <b>Pulse Sequence</b> single pulse dec                    | <b>Original Points Count</b> 32768 |
| <b>Spectrum Offset (Hz)</b> 15091.3428 | <b>Sweep Width (Hz)</b> 47348.49                          | <b>Receiver Gain</b> 58.00         |
|                                        |                                                           | <b>Solvent</b> DMSO-d6             |

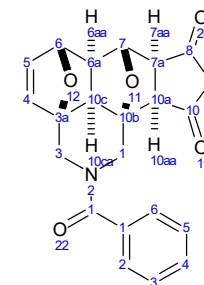

3e

FZ9062-2.JDF

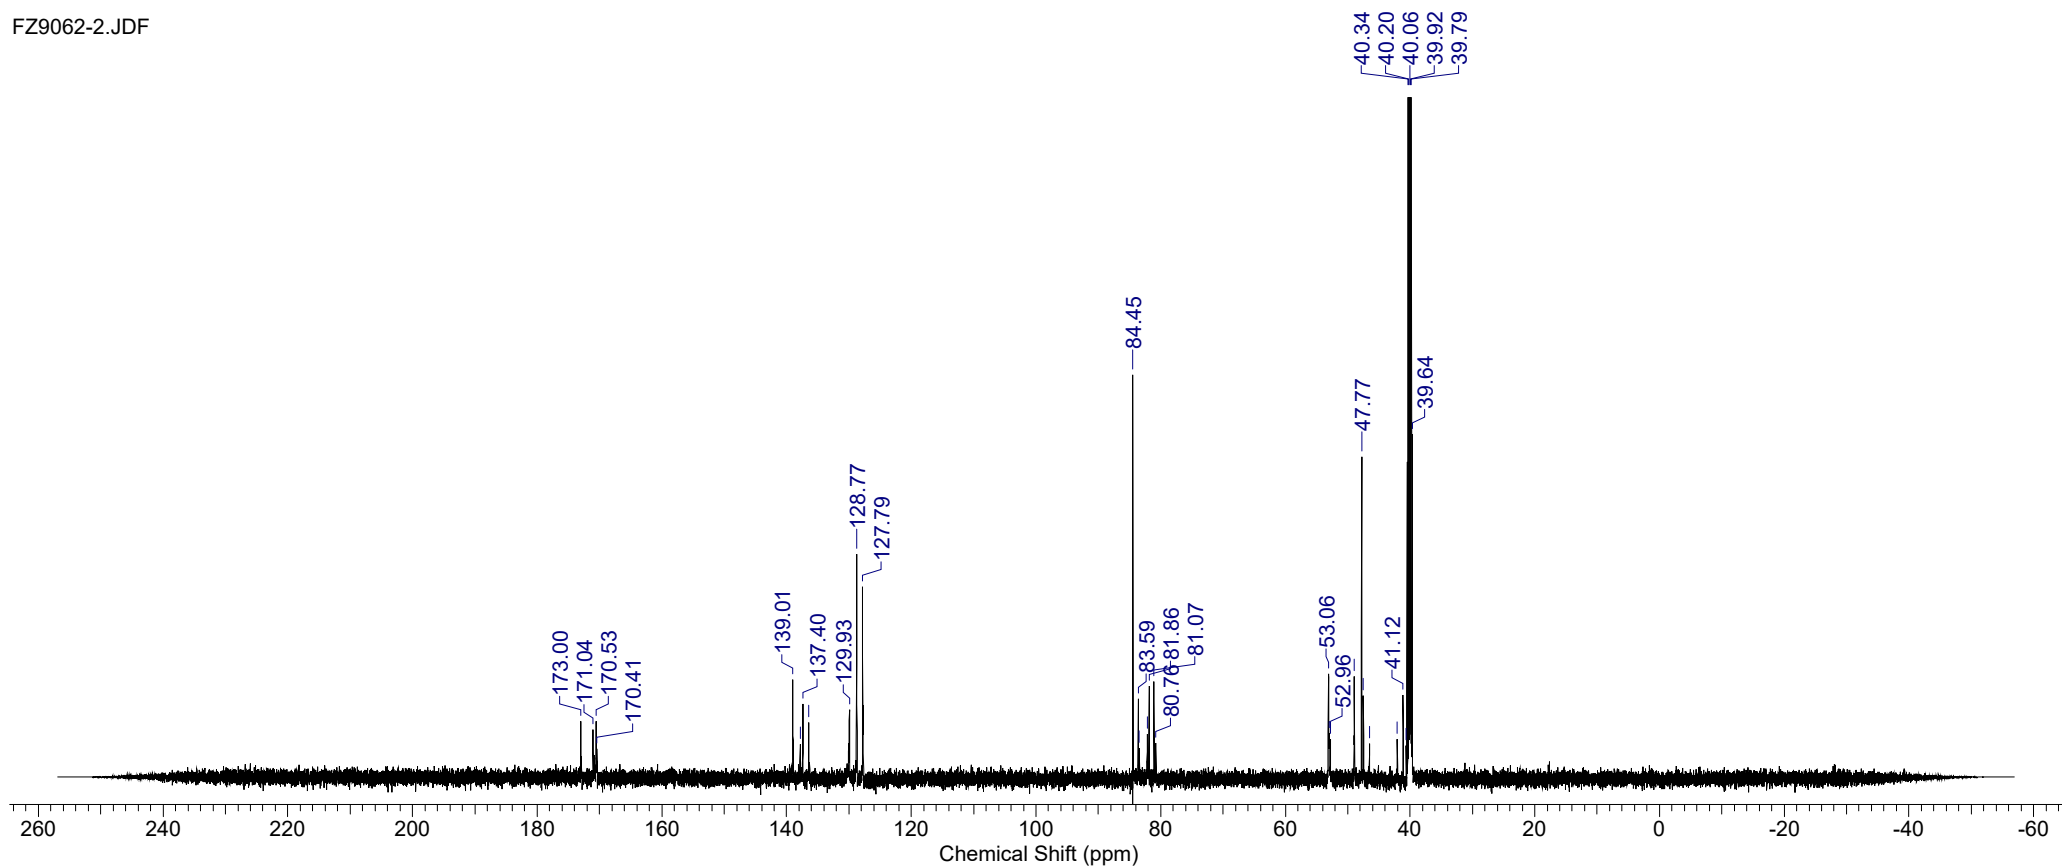

|                                                                |                    |
|----------------------------------------------------------------|--------------------|
| <b>Formula</b> C <sub>21</sub> H <sub>17</sub> NO <sub>6</sub> | <b>FW</b> 379.3628 |
|----------------------------------------------------------------|--------------------|

|                                        |                                                           |                                    |
|----------------------------------------|-----------------------------------------------------------|------------------------------------|
| <b>Acquisition Time (sec)</b> 0.6921   | <b>Comment</b> single pulse decoupled gated NOE           | <b>Date</b> 28 Aug 2020 12:38:22   |
| <b>Date Stamp</b> 28 Aug 2020 12:39:42 | <b>File Name</b> C:\USERS\lta6a534\DOWNLOADS\FZ9062-2.JDF | <b>Frequency (MHz)</b> 150.91      |
| <b>Nucleus</b> 13C                     | <b>Number of Transients</b> 1000                          | <b>Origin</b> ECA 600              |
| <b>Points Count</b> 32768              | <b>Pulse Sequence</b> single pulse dec                    | <b>Original Points Count</b> 32768 |
| <b>Spectrum Offset (Hz)</b> 15091.3428 | <b>Sweep Width (Hz)</b> 47348.49                          | <b>Receiver Gain</b> 58.00         |
|                                        |                                                           | <b>Solvent</b> DMSO-d6             |

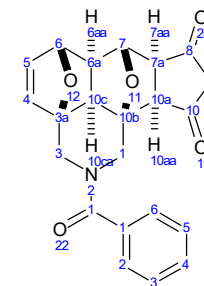

3e

FZ9062-2.JDF

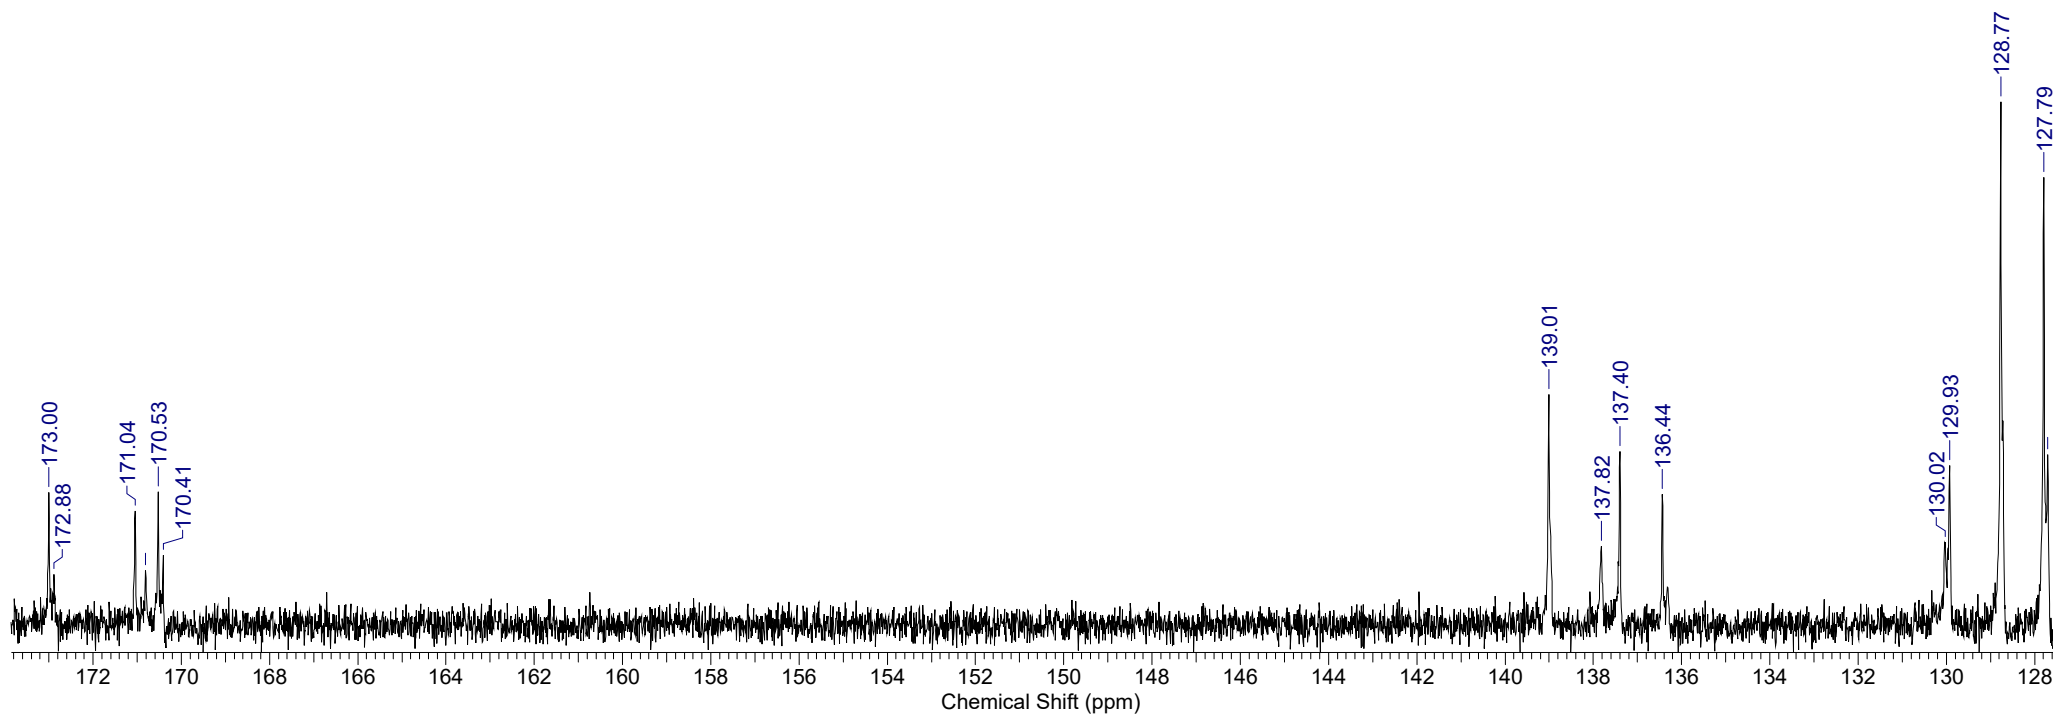



|                                                                |                    |
|----------------------------------------------------------------|--------------------|
| <b>Formula</b> C <sub>21</sub> H <sub>17</sub> NO <sub>6</sub> | <b>FW</b> 379.3628 |
|----------------------------------------------------------------|--------------------|

|                                        |                                                           |                                    |
|----------------------------------------|-----------------------------------------------------------|------------------------------------|
| <b>Acquisition Time (sec)</b> 0.6921   | <b>Comment</b> single pulse decoupled gated NOE           | <b>Date</b> 28 Aug 2020 12:38:22   |
| <b>Date Stamp</b> 28 Aug 2020 12:39:42 | <b>File Name</b> C:\USERS\lta6a534\DOWNLOADS\FZ9062-2.JDF | <b>Frequency (MHz)</b> 150.91      |
| <b>Nucleus</b> 13C                     | <b>Number of Transients</b> 1000                          | <b>Origin</b> ECA 600              |
| <b>Points Count</b> 32768              | <b>Pulse Sequence</b> single pulse dec                    | <b>Original Points Count</b> 32768 |
| <b>Spectrum Offset (Hz)</b> 15091.3428 | <b>Sweep Width (Hz)</b> 47348.49                          | <b>Receiver Gain</b> 58.00         |
|                                        |                                                           | <b>Solvent</b> DMSO-d6             |



3e

FZ9062-2.JDF

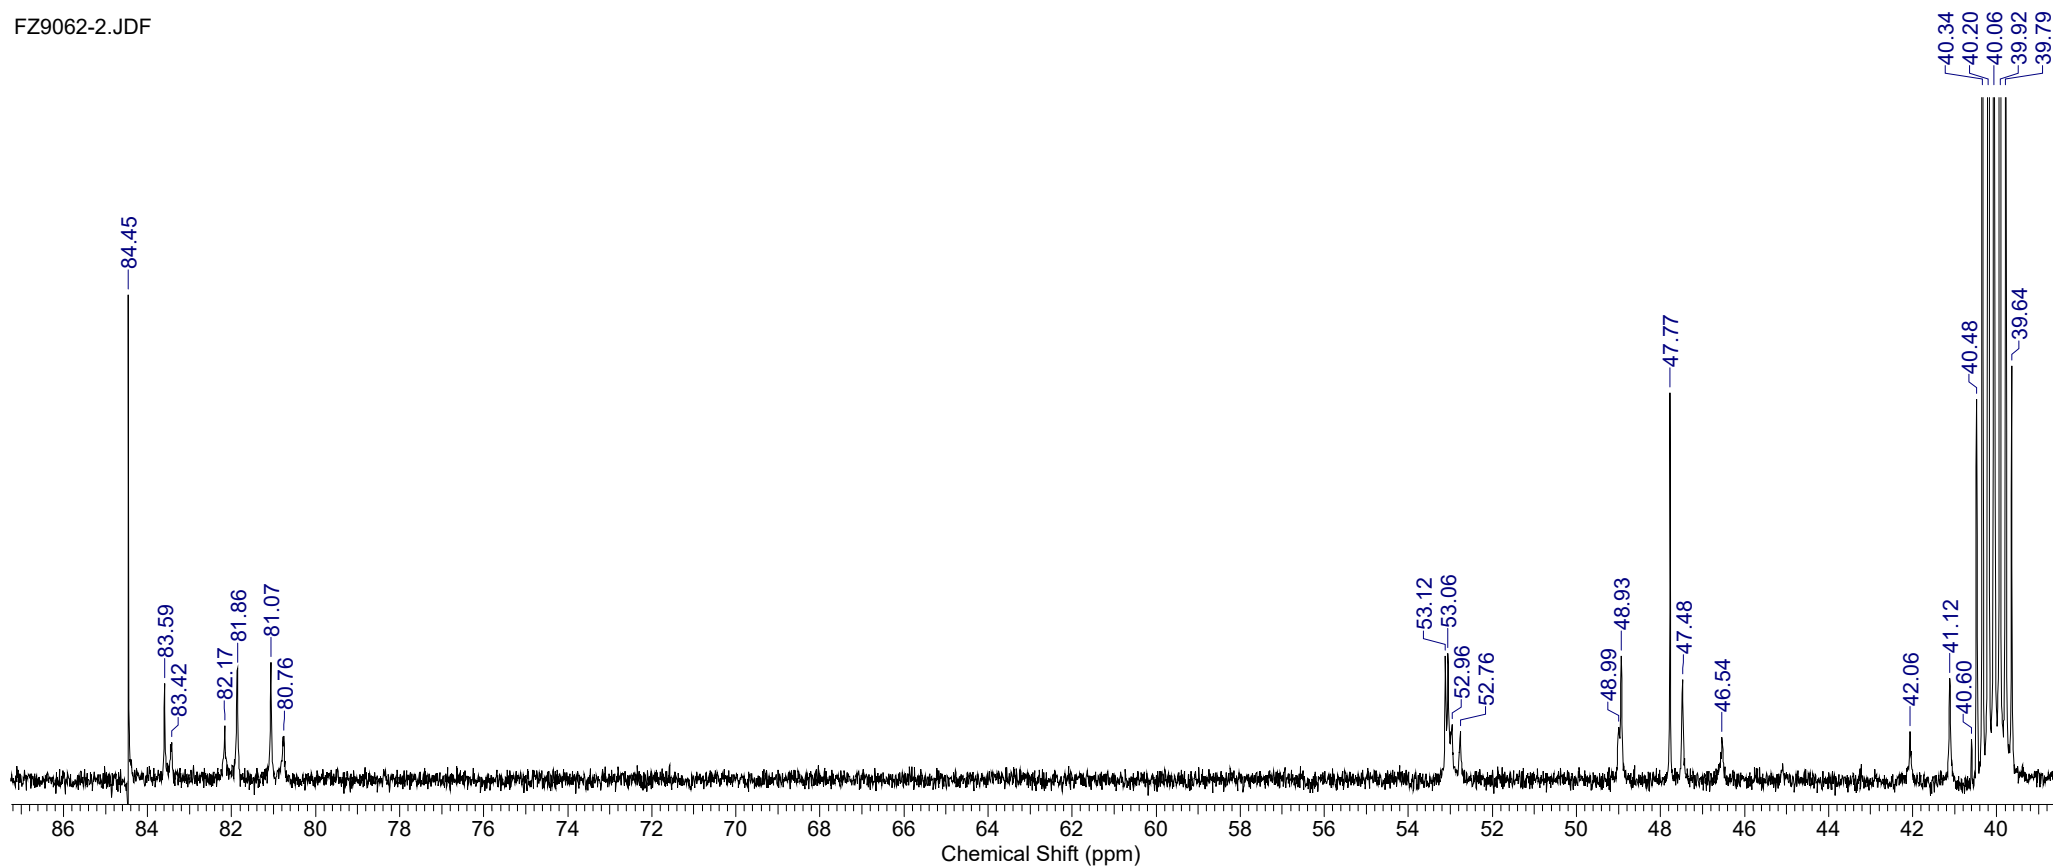

|                                                               |                    |
|---------------------------------------------------------------|--------------------|
| <b>Formula</b> C <sub>14</sub> H <sub>12</sub> O <sub>6</sub> | <b>FW</b> 276.2415 |
|---------------------------------------------------------------|--------------------|

|                                        |                                                                     |                                       |
|----------------------------------------|---------------------------------------------------------------------|---------------------------------------|
| <b>Acquisition Time (sec)</b> 1.5729   | <b>Comment</b> 5 mm QNP 1H/15N/13C/31P Z3379/0400                   | <b>Date</b> 07 May 2014 15:49:20      |
| <b>Date Stamp</b> 07 May 2014 15:49:20 | <b>File Name</b> C:\USERS\laba534\DESKTOP\FZ-0414-KVYAT-16A_001001r |                                       |
| <b>Frequency (MHz)</b> 400.14          | <b>Nucleus</b> 1H                                                   | <b>Number of Transients</b> 64        |
| <b>Original Points Count</b> 16384     | <b>Owner</b> root                                                   | <b>Origin</b> spect                   |
| <b>Receiver Gain</b> 1024.00           | <b>SW(cyclical) (Hz)</b> 10416.67                                   | <b>Points Count</b> 65536             |
| <b>Sweep Width (Hz)</b> 10416.51       | <b>Temperature (degree C)</b> 90.000                                | <b>Pulse Sequence</b> zg              |
|                                        | <b>Solvent</b> DMSO-d6                                              | <b>Spectrum Offset (Hz)</b> 2712.0005 |

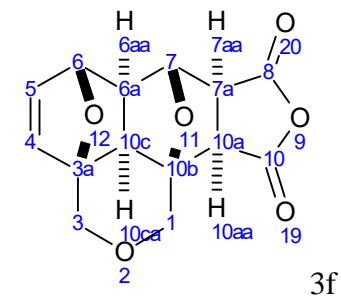

FZ-0414-KVYAT-16A\_001001r

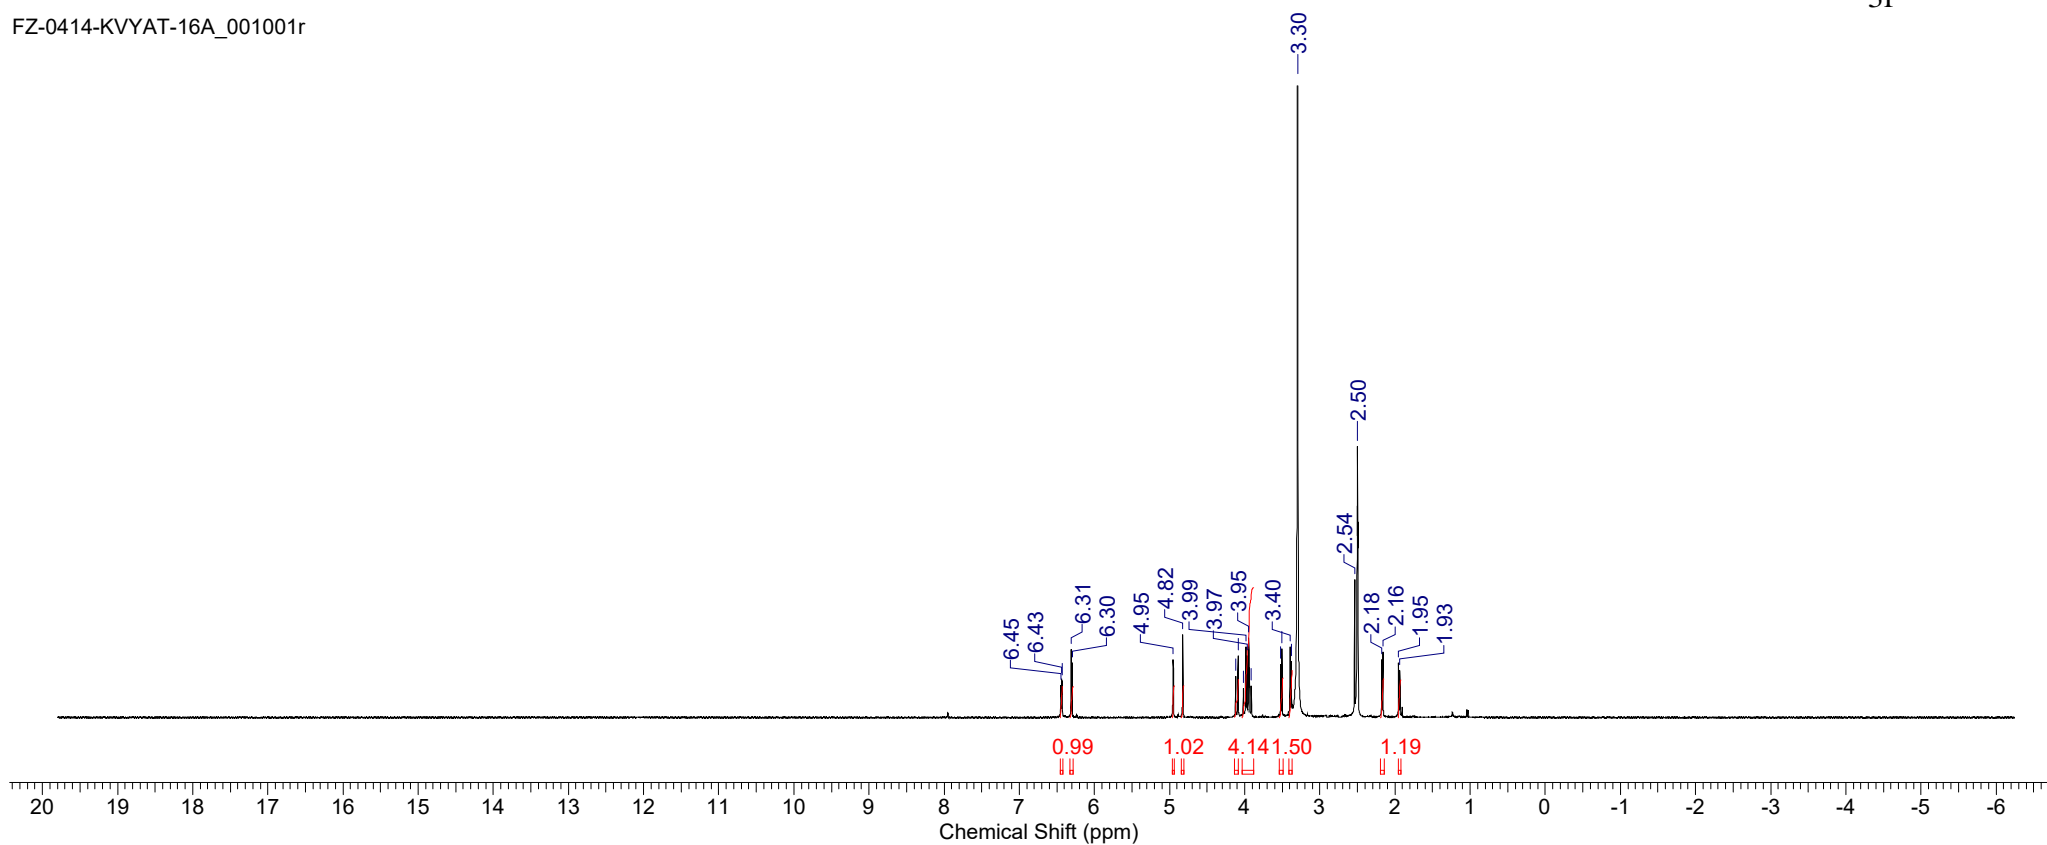

|                                                               |                    |
|---------------------------------------------------------------|--------------------|
| <b>Formula</b> C <sub>14</sub> H <sub>12</sub> O <sub>6</sub> | <b>FW</b> 276.2415 |
|---------------------------------------------------------------|--------------------|

|                               |                      |                               |                                                    |                             |                      |
|-------------------------------|----------------------|-------------------------------|----------------------------------------------------|-----------------------------|----------------------|
| <b>Acquisition Time (sec)</b> | 1.5729               | <b>Comment</b>                | 5 mm QNP 1H/15N/13C/31P Z3379/0400                 | <b>Date</b>                 | 07 May 2014 15:49:20 |
| <b>Date Stamp</b>             | 07 May 2014 15:49:20 | <b>File Name</b>              | C:\USERS\laba534\DESKTOP\FZ-0414-KVYAT-16A_001001r |                             |                      |
| <b>Frequency (MHz)</b>        | 400.14               | <b>Nucleus</b>                | 1H                                                 | <b>Number of Transients</b> | 64                   |
| <b>Original Points Count</b>  | 16384                | <b>Owner</b>                  | root                                               | <b>Origin</b>               | spect                |
| <b>Receiver Gain</b>          | 1024.00              | <b>SW(cyclical) (Hz)</b>      | 10416.67                                           | <b>Points Count</b>         | 65536                |
| <b>Sweep Width (Hz)</b>       | 10416.51             | <b>Temperature (degree C)</b> | 90.000                                             | <b>Pulse Sequence</b>       | zg                   |
|                               |                      |                               |                                                    | <b>Solvent</b>              | DMSO-d6              |
|                               |                      |                               |                                                    | <b>Spectrum Offset (Hz)</b> | 2712.0005            |

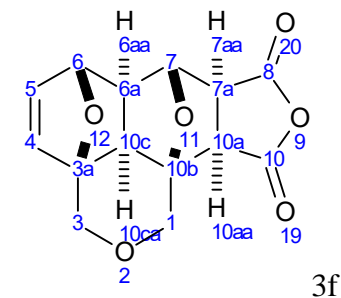

FZ-0414-KVYAT-16A\_001001r

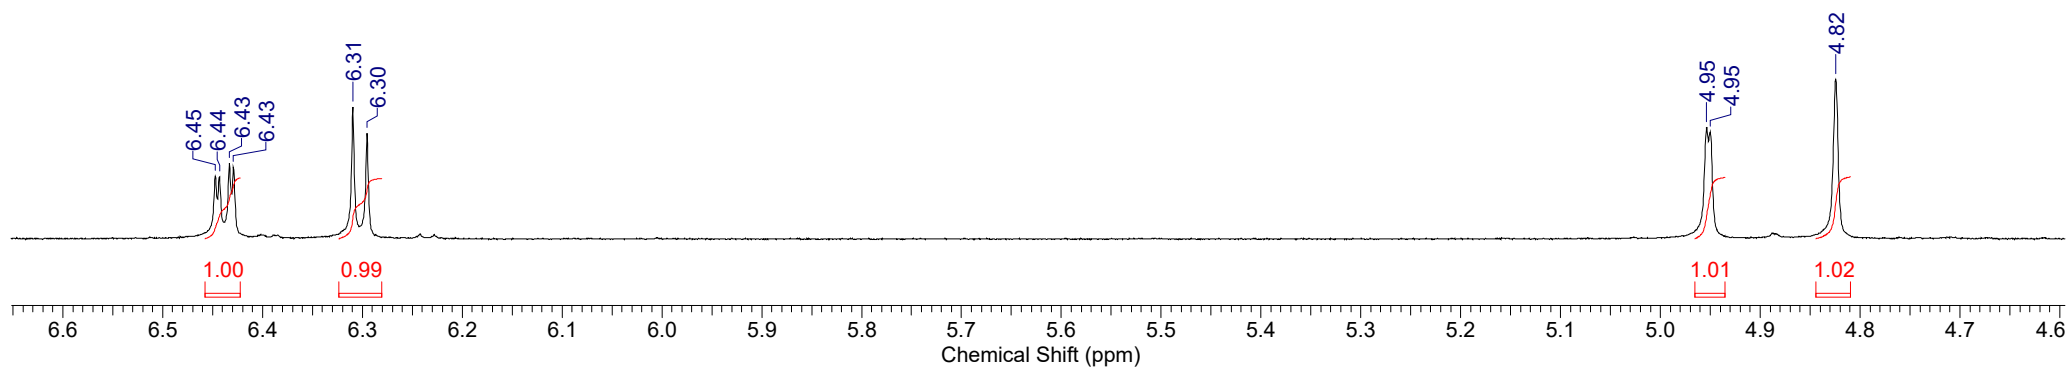

|                                                               |                    |
|---------------------------------------------------------------|--------------------|
| <b>Formula</b> C <sub>14</sub> H <sub>12</sub> O <sub>6</sub> | <b>FW</b> 276.2415 |
|---------------------------------------------------------------|--------------------|

|                                        |                                                                     |                                       |
|----------------------------------------|---------------------------------------------------------------------|---------------------------------------|
| <b>Acquisition Time (sec)</b> 1.5729   | <b>Comment</b> 5 mm QNP 1H/15N/13C/31P Z3379/0400                   | <b>Date</b> 07 May 2014 15:49:20      |
| <b>Date Stamp</b> 07 May 2014 15:49:20 | <b>File Name</b> C:\USERS\Ia6a534\DESKTOP\FZ-0414-KVYAT-16A_001001r |                                       |
| <b>Frequency (MHz)</b> 400.14          | <b>Nucleus</b> 1H                                                   | <b>Number of Transients</b> 64        |
| <b>Original Points Count</b> 16384     | <b>Owner</b> root                                                   | <b>Points Count</b> 65536             |
| <b>Receiver Gain</b> 1024.00           | <b>SW(cyclical) (Hz)</b> 10416.67                                   | <b>Origin</b> spect                   |
| <b>Sweep Width (Hz)</b> 10416.51       | <b>Temperature (degree C)</b> 90.000                                | <b>Pulse Sequence</b> zg              |
|                                        | <b>Solvent</b> DMSO-d6                                              | <b>Spectrum Offset (Hz)</b> 2712.0005 |

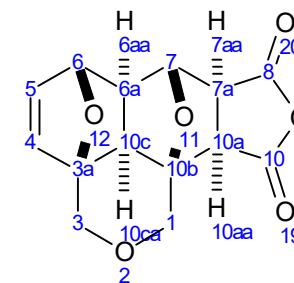

3f

FZ-0414-KVYAT-16A\_001001r

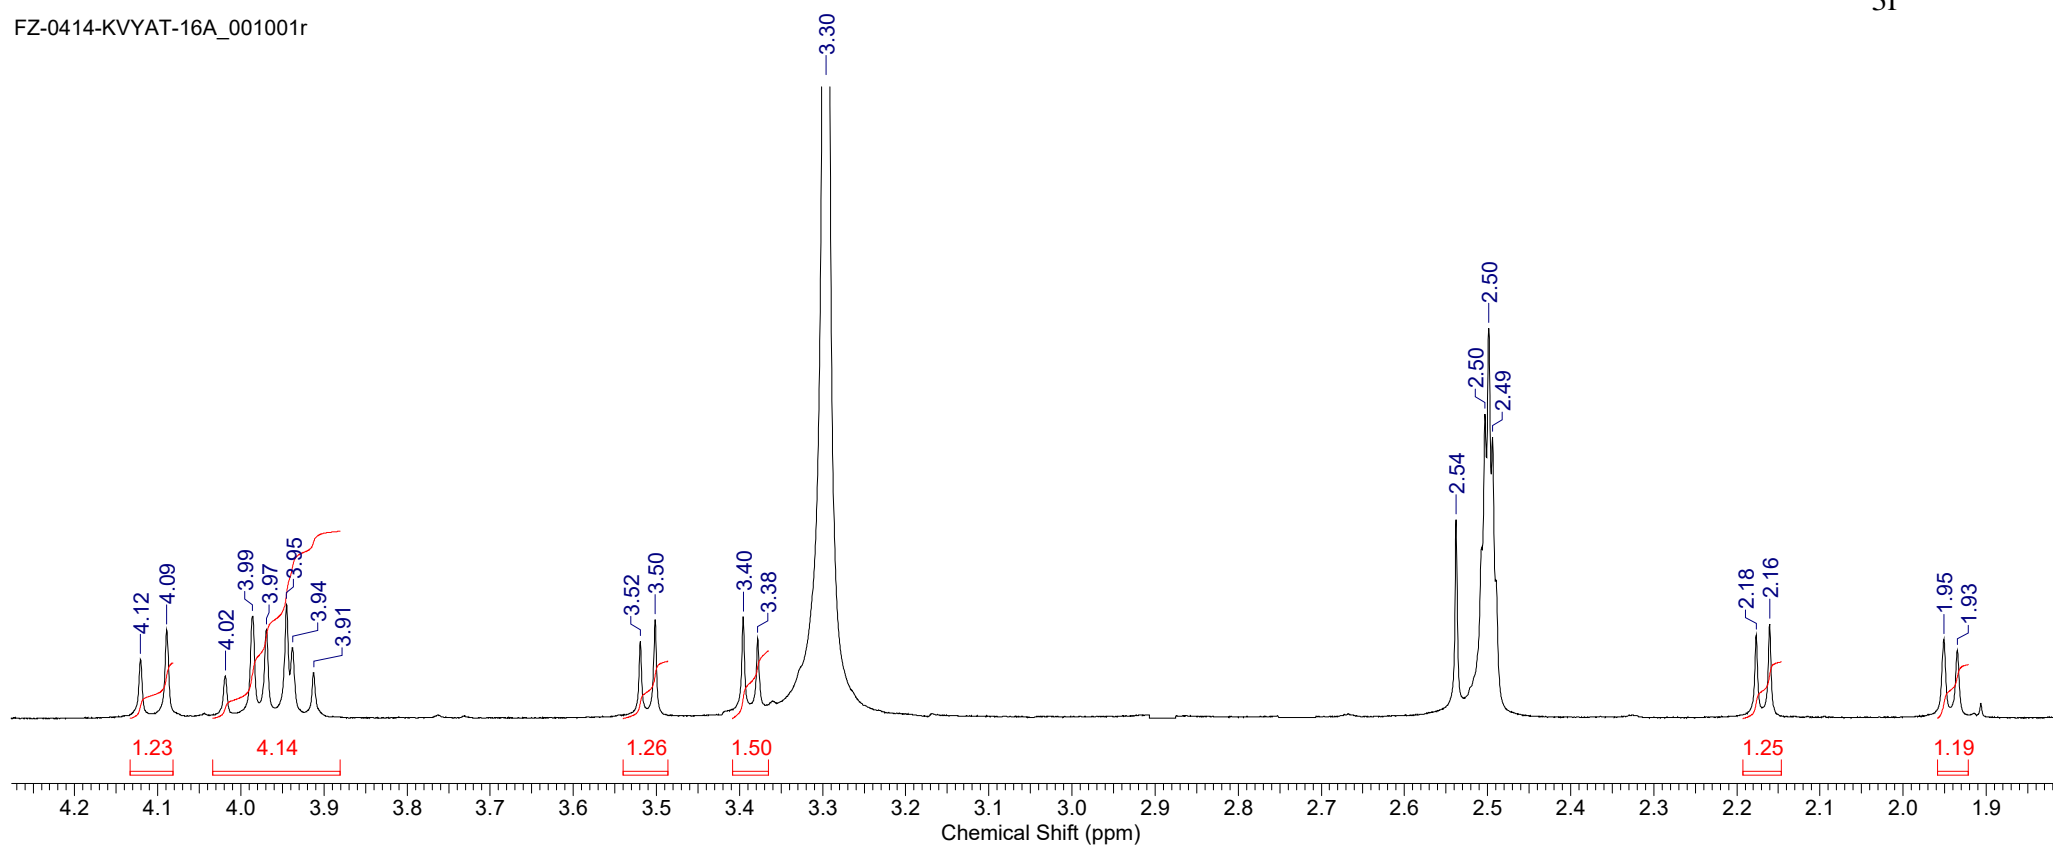

|                                                               |                    |
|---------------------------------------------------------------|--------------------|
| <b>Formula</b> C <sub>14</sub> H <sub>12</sub> O <sub>6</sub> | <b>FW</b> 276.2415 |
|---------------------------------------------------------------|--------------------|

|                                        |                                                                             |                                        |
|----------------------------------------|-----------------------------------------------------------------------------|----------------------------------------|
| <b>Acquisition Time (sec)</b> 0.5571   | <b>Comment</b> 5 mm QNP 1H/15N/13C/31P Z3379/0400                           | <b>Date</b> 07 May 2014 15:49:20       |
| <b>Date Stamp</b> 07 May 2014 15:49:20 | <b>File Name</b> C:\USERS\lta6a534\DESKTOP\FZ-0414-KVYAT-16A-C13DEC_001001r |                                        |
| <b>Frequency (MHz)</b> 100.61          | <b>Nucleus</b> 13C                                                          | <b>Number of Transients</b> 29986      |
| <b>Original Points Count</b> 16384     | <b>Owner</b> root                                                           | <b>Origin</b> spect                    |
| <b>Receiver Gain</b> 32768.00          | <b>SW(cyclical) (Hz)</b> 29411.77                                           | <b>Points Count</b> 65536              |
| <b>Sweep Width (Hz)</b> 29411.32       | <b>Solvent</b> DMSO-d6                                                      | <b>Pulse Sequence</b> zgpg             |
|                                        | <b>Temperature (degree C)</b> 90.000                                        | <b>Spectrum Offset (Hz)</b> 10546.7725 |

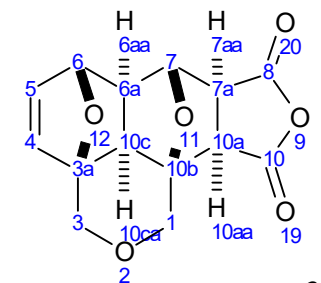

3f

FZ-0414-KVYAT-16A-C13DEC\_001001r

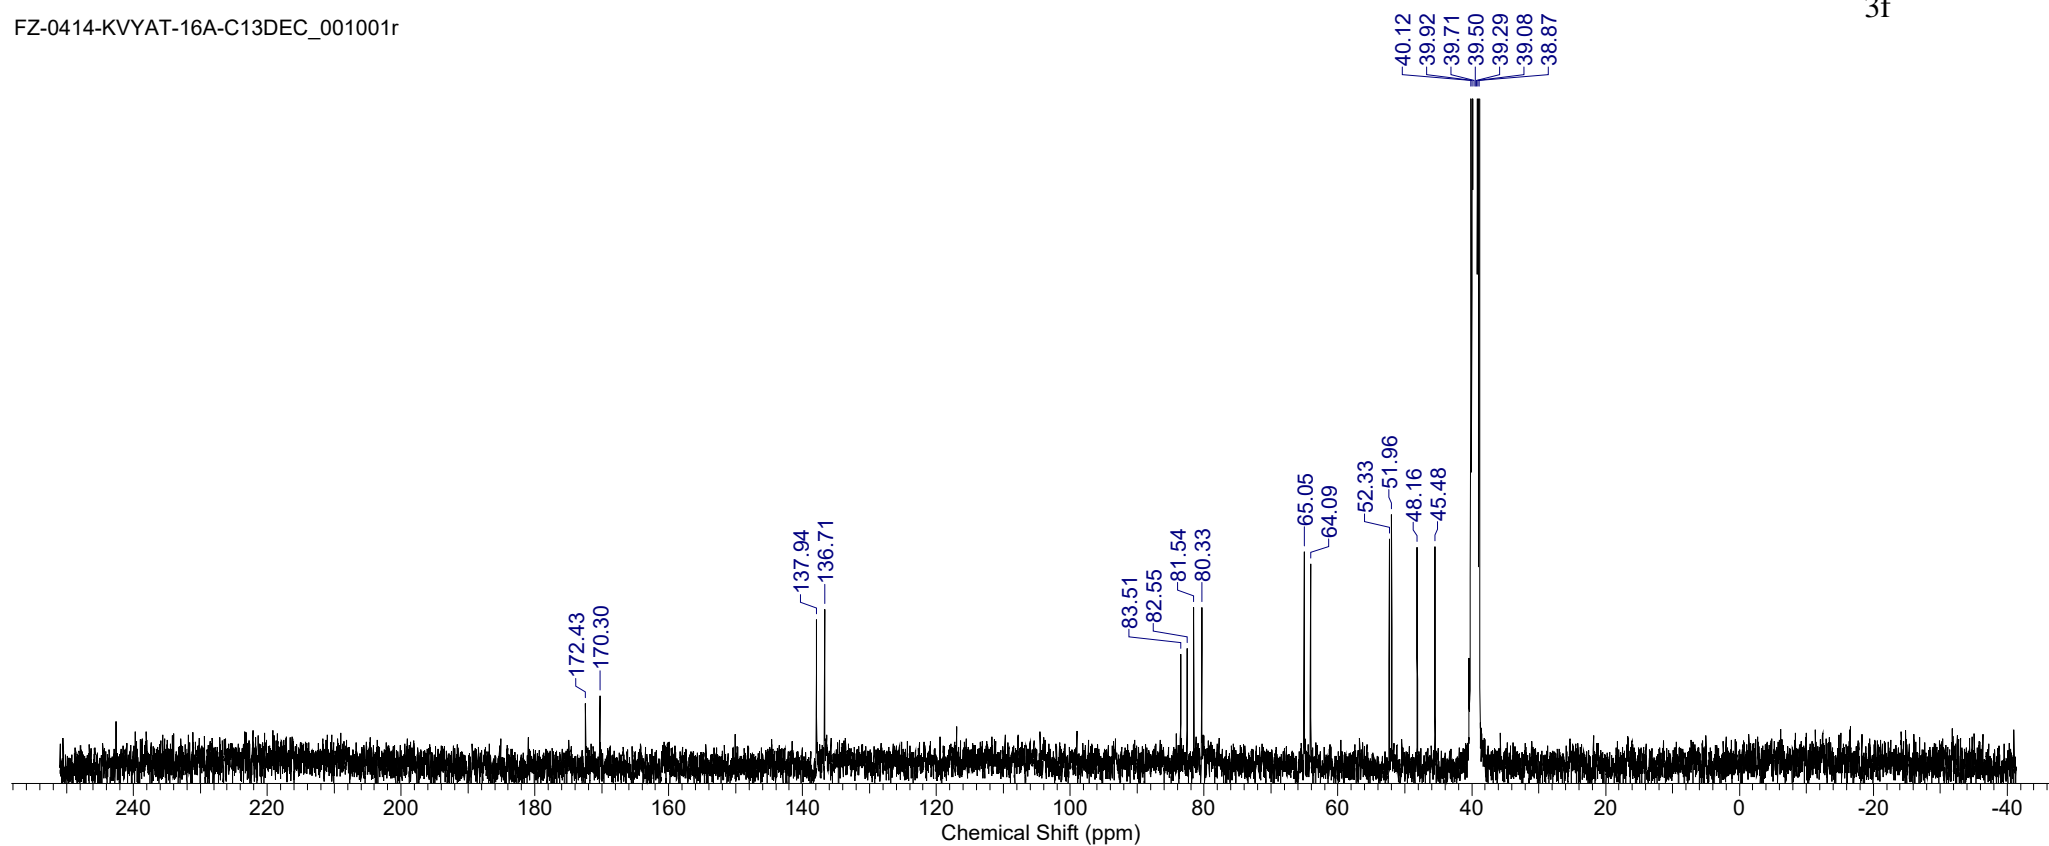

|                                                               |                    |
|---------------------------------------------------------------|--------------------|
| <b>Formula</b> C <sub>14</sub> H <sub>12</sub> O <sub>6</sub> | <b>FW</b> 276.2415 |
|---------------------------------------------------------------|--------------------|

|                               |                      |                          |                                                           |                             |                      |
|-------------------------------|----------------------|--------------------------|-----------------------------------------------------------|-----------------------------|----------------------|
| <b>Acquisition Time (sec)</b> | 0.5571               | <b>Comment</b>           | 5 mm QNP 1H/15N/13C/31P Z3379/0400                        | <b>Date</b>                 | 07 May 2014 15:49:20 |
| <b>Date Stamp</b>             | 07 May 2014 15:49:20 | <b>File Name</b>         | C:\USERS\la6a534\DESKTOP\FZ-0414-KVYAT-16A-C13DEC_001001r |                             |                      |
| <b>Frequency (MHz)</b>        | 100.61               | <b>Nucleus</b>           | 13C                                                       | <b>Number of Transients</b> | 29986                |
| <b>Original Points Count</b>  | 16384                | <b>Owner</b>             | root                                                      | <b>Points Count</b>         | 65536                |
| <b>Receiver Gain</b>          | 32768.00             | <b>SW(cyclical) (Hz)</b> | 29411.77                                                  | <b>Pulse Sequence</b>       | zgpg                 |
| <b>Sweep Width (Hz)</b>       | 29411.32             | <b>Solvent</b>           | DMSO-d6                                                   | <b>Spectrum Offset (Hz)</b> | 10546.7725           |
| <b>Temperature (degree C)</b> | 90.000               |                          |                                                           |                             |                      |

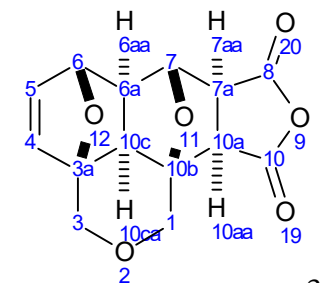

3f

FZ-0414-KVYAT-16A-C13DEC\_001001r

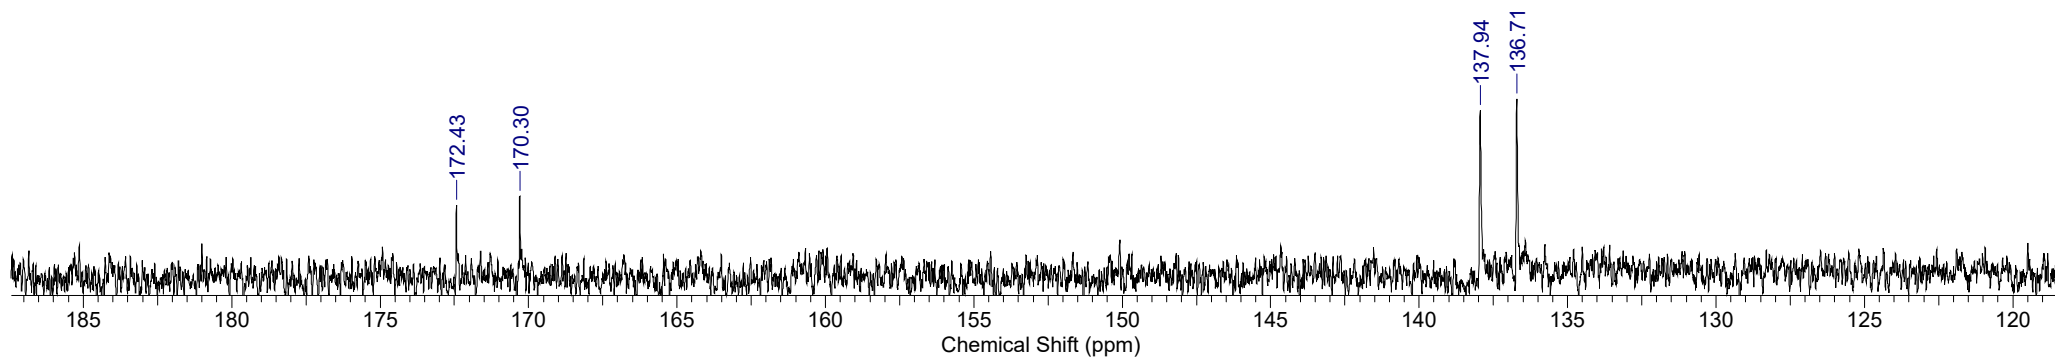

|                                                               |                    |
|---------------------------------------------------------------|--------------------|
| <b>Formula</b> C <sub>14</sub> H <sub>12</sub> O <sub>6</sub> | <b>FW</b> 276.2415 |
|---------------------------------------------------------------|--------------------|

|                               |                      |                               |                                                           |                             |                      |
|-------------------------------|----------------------|-------------------------------|-----------------------------------------------------------|-----------------------------|----------------------|
| <b>Acquisition Time (sec)</b> | 0.5571               | <b>Comment</b>                | 5 mm QNP 1H/15N/13C/31P Z3379/0400                        | <b>Date</b>                 | 07 May 2014 15:49:20 |
| <b>Date Stamp</b>             | 07 May 2014 15:49:20 | <b>File Name</b>              | C:\USERS\la6a534\DESKTOP\FZ-0414-KVYAT-16A-C13DEC_001001r |                             |                      |
| <b>Frequency (MHz)</b>        | 100.61               | <b>Nucleus</b>                | 13C                                                       | <b>Number of Transients</b> | 29986                |
| <b>Original Points Count</b>  | 16384                | <b>Owner</b>                  | root                                                      | <b>Points Count</b>         | 65536                |
| <b>Receiver Gain</b>          | 32768.00             | <b>SW(cyclical) (Hz)</b>      | 29411.77                                                  | <b>Pulse Sequence</b>       | zgpg                 |
| <b>Sweep Width (Hz)</b>       | 29411.32             | <b>Temperature (degree C)</b> | 90.000                                                    | <b>Solvent</b>              | DMSO-d6              |
|                               |                      |                               |                                                           | <b>Spectrum Offset (Hz)</b> | 10546.7725           |

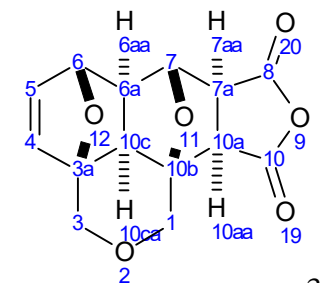

3f

FZ-0414-KVYAT-16A-C13DEC\_001001r

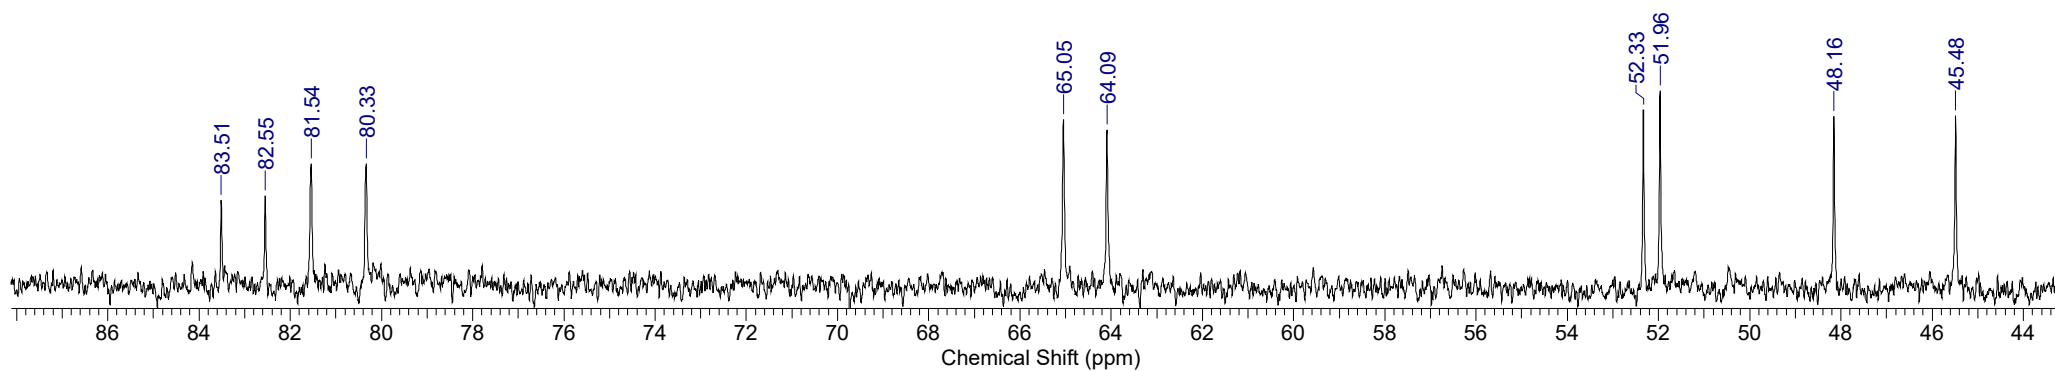

**Formula** C<sub>14</sub>H<sub>12</sub>O<sub>5</sub>S **FW** 292.3071

|                               |                      |                             |                                                  |                             |                      |                               |        |                              |          |
|-------------------------------|----------------------|-----------------------------|--------------------------------------------------|-----------------------------|----------------------|-------------------------------|--------|------------------------------|----------|
| <b>Acquisition Time (sec)</b> | 1.5729               | <b>Comment</b>              | 5 mm QNP 1H/15N/13C/31P Z3379/0400               | <b>Date</b>                 | 06 May 2014 11:24:48 |                               |        |                              |          |
| <b>Date Stamp</b>             | 06 May 2014 11:24:48 | <b>File Name</b>            | C:\USERS\Лабa534\DESKTOP\FZ-0414-BOR-16A_001001r |                             |                      |                               |        |                              |          |
| <b>Frequency (MHz)</b>        | 400.14               | <b>Nucleus</b>              | 1H                                               | <b>Number of Transients</b> | 16                   | <b>Origin</b>                 | spect  | <b>Original Points Count</b> | 16384    |
| <b>Owner</b>                  | root                 | <b>Points Count</b>         | 65536                                            | <b>Pulse Sequence</b>       | zg                   | <b>Receiver Gain</b>          | 512.00 | <b>SW(cyclical) (Hz)</b>     | 10416.67 |
| <b>Solvent</b>                | DMSO-d6              | <b>Spectrum Offset (Hz)</b> | 2712.0005                                        | <b>Sweep Width (Hz)</b>     | 10416.51             | <b>Temperature (degree C)</b> | 32.000 |                              |          |

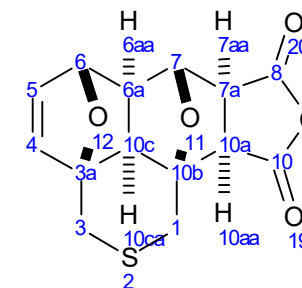

FZ-0414-BOR-16A\_001001r

3g

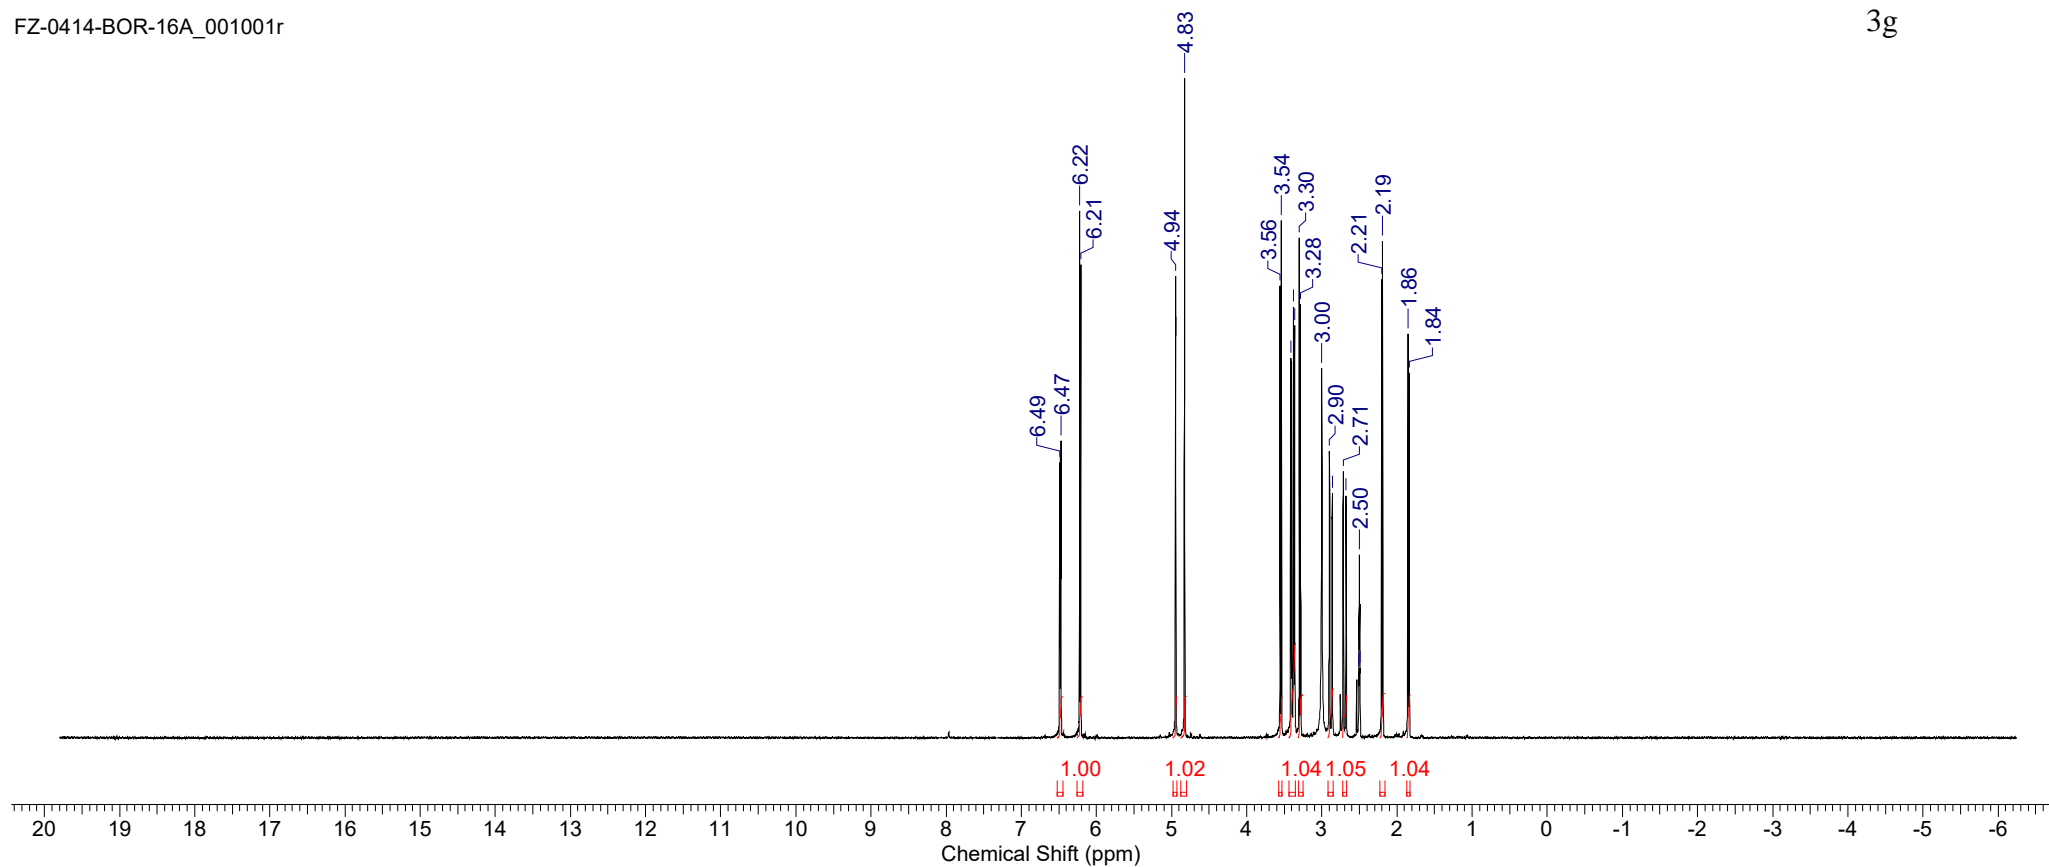



Formula C<sub>14</sub>H<sub>12</sub>O<sub>5</sub>S FW 292.3071

|                        |                      |                      |                                                  |                        |                      |
|------------------------|----------------------|----------------------|--------------------------------------------------|------------------------|----------------------|
| Acquisition Time (sec) | 1.5729               | Comment              | 5 mm QNP 1H/15N/13C/31P Z3379/0400               | Date                   | 06 May 2014 11:24:48 |
| Date Stamp             | 06 May 2014 11:24:48 | File Name            | C:\USERS\Лабa534\DESKTOP\FZ-0414-BOR-16A_001001r | Original Points Count  | 16384                |
| Frequency (MHz)        | 400.14               | Nucleus              | 1H                                               | Number of Transients   | 16                   |
| Owner                  | root                 | Points Count         | 65536                                            | Pulse Sequence         | zg                   |
| Solvent                | DMSO-d6              | Spectrum Offset (Hz) | 2712.0005                                        | Receiver Gain          | 512.00               |
|                        |                      | Sweep Width (Hz)     | 10416.51                                         | SW(cyclical) (Hz)      | 10416.67             |
|                        |                      |                      |                                                  | Temperature (degree C) | 32.000               |

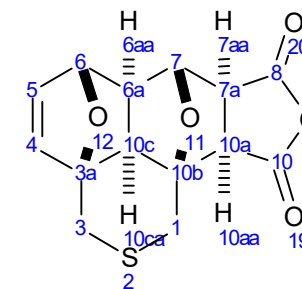

FZ-0414-BOR-16A\_001001r

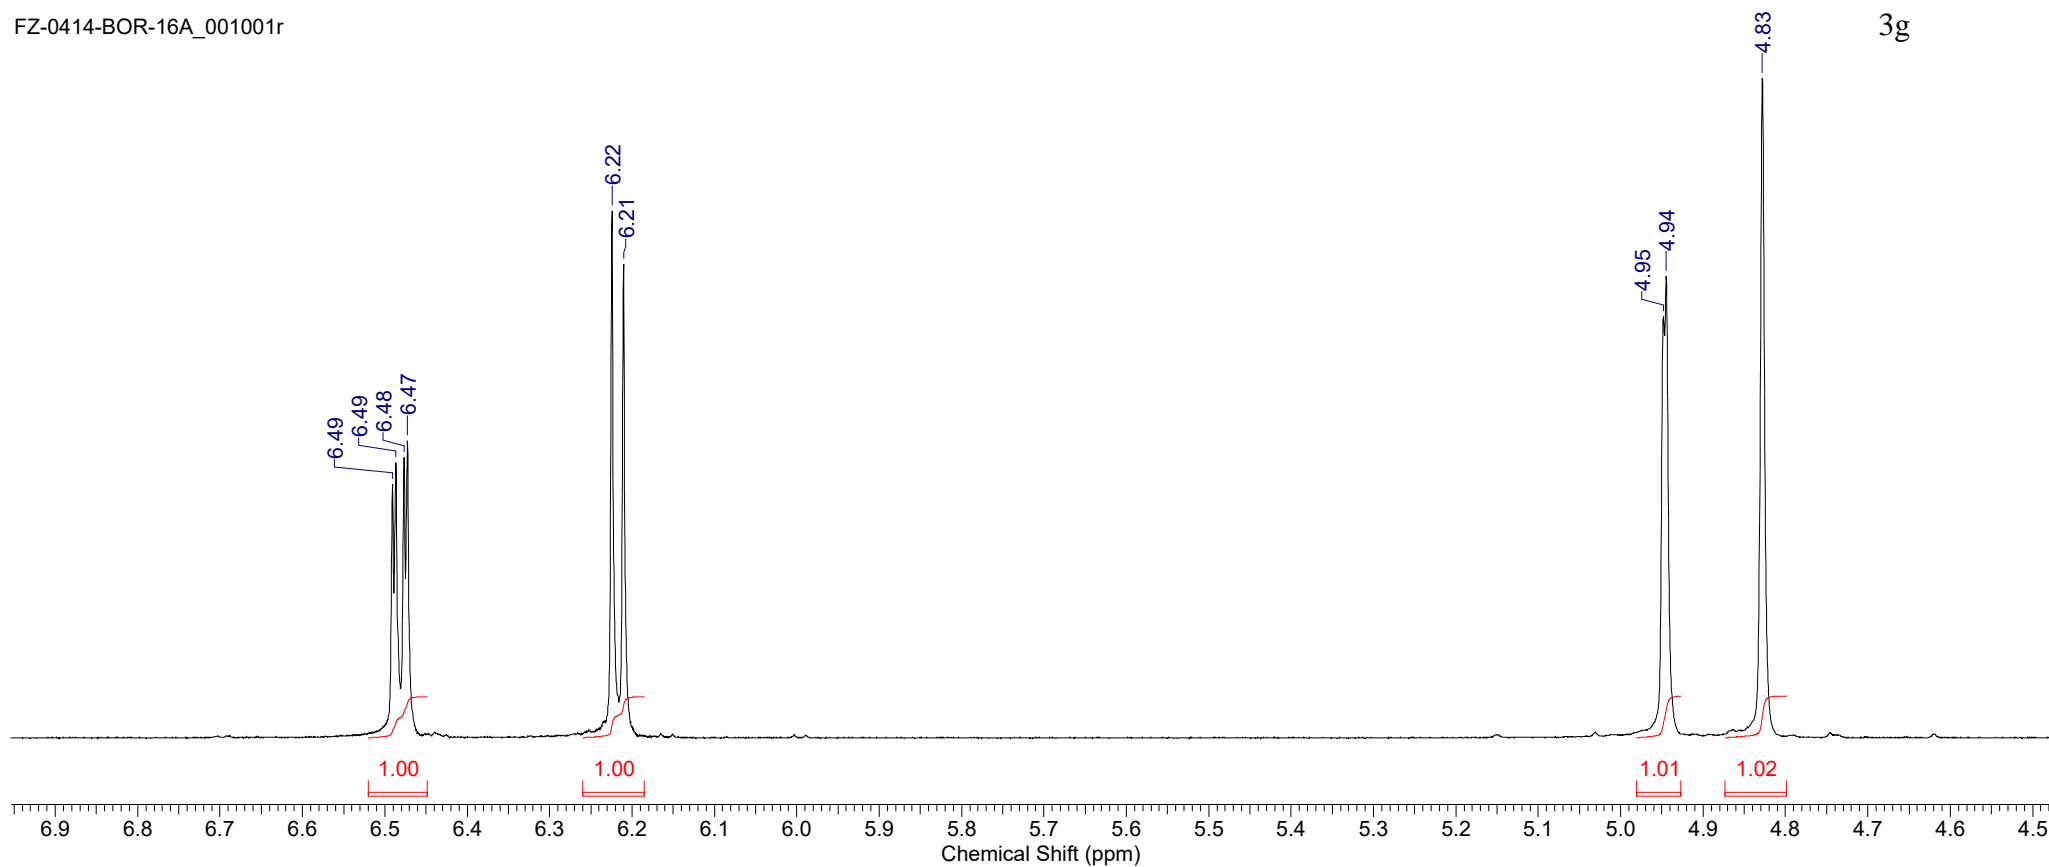

Formula C<sub>14</sub>H<sub>12</sub>O<sub>5</sub>S FW 292.3071

|                        |                      |                      |                                                  |                      |                      |                        |        |                       |          |
|------------------------|----------------------|----------------------|--------------------------------------------------|----------------------|----------------------|------------------------|--------|-----------------------|----------|
| Acquisition Time (sec) | 1.5729               | Comment              | 5 mm QNP 1H/15N/13C/31P Z3379/0400               | Date                 | 06 May 2014 11:24:48 |                        |        |                       |          |
| Date Stamp             | 06 May 2014 11:24:48 | File Name            | C:\USERS\Лабa534\DESKTOP\FZ-0414-BOR-16A_001001r |                      |                      |                        |        |                       |          |
| Frequency (MHz)        | 400.14               | Nucleus              | 1H                                               | Number of Transients | 16                   | Origin                 | spect  | Original Points Count | 16384    |
| Owner                  | root                 | Points Count         | 65536                                            | Pulse Sequence       | zg                   | Receiver Gain          | 512.00 | SW(cyclical) (Hz)     | 10416.67 |
| Solvent                | DMSO-d6              | Spectrum Offset (Hz) | 2712.0005                                        | Sweep Width (Hz)     | 10416.51             | Temperature (degree C) | 32.000 |                       |          |



FZ-0414-BOR-16A\_001001r

3g

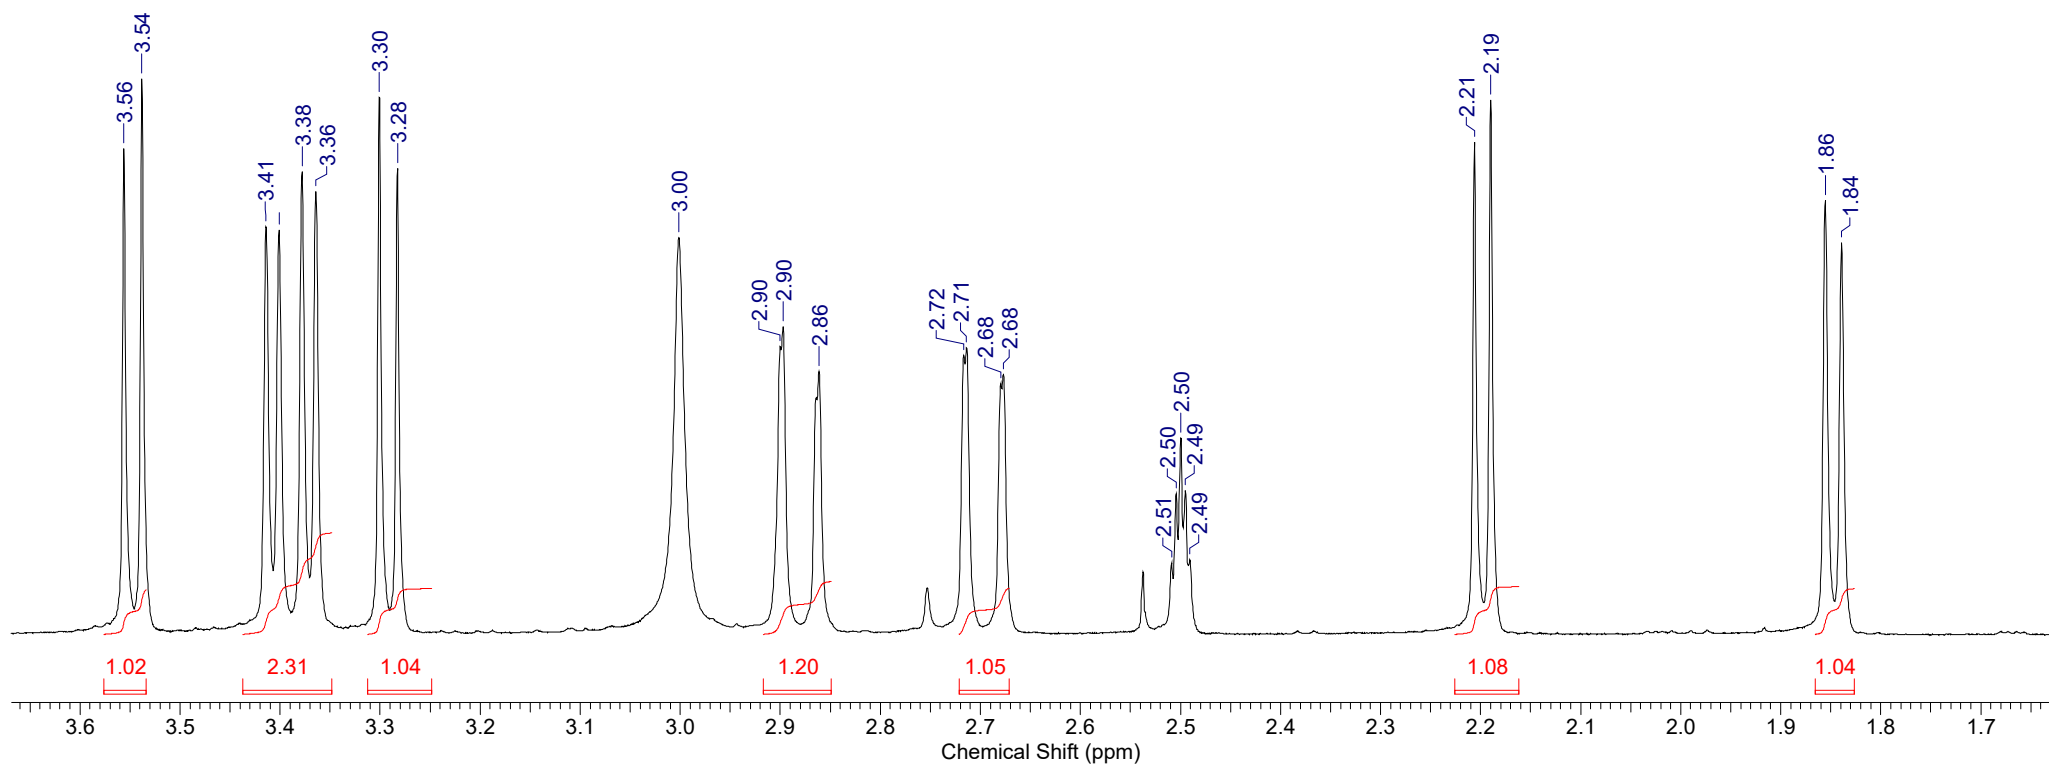

|                                                                 |                    |
|-----------------------------------------------------------------|--------------------|
| <b>Formula</b> C <sub>14</sub> H <sub>12</sub> O <sub>5</sub> S | <b>FW</b> 292.3071 |
|-----------------------------------------------------------------|--------------------|

|                                        |                                                                            |                                        |
|----------------------------------------|----------------------------------------------------------------------------|----------------------------------------|
| <b>Acquisition Time (sec)</b> 0.5571   | <b>Comment</b> 5 mm QNP 1H/15N/13C/31P Z3379/0400                          | <b>Date</b> 06 May 2014 12:24:32       |
| <b>Date Stamp</b> 06 May 2014 12:24:32 | <b>File Name</b> C:\USERS\Ja6a534\DESKTOP\FZ-0414-BOR-16A-C13DEC-1_001001r |                                        |
| <b>Frequency (MHz)</b> 100.61          | <b>Nucleus</b> 13C                                                         | <b>Number of Transients</b> 1072       |
| <b>Original Points Count</b> 16384     | <b>Owner</b> root                                                          | <b>Points Count</b> 65536              |
| <b>Receiver Gain</b> 32768.00          | <b>SW(cyclical) (Hz)</b> 29411.77                                          | <b>Solvent</b> DMSO-d6                 |
| <b>Sweep Width (Hz)</b> 29411.32       | <b>Temperature (degree C)</b> 90.000                                       | <b>Pulse Sequence</b> zgpg             |
|                                        |                                                                            | <b>Spectrum Offset (Hz)</b> 10502.3320 |

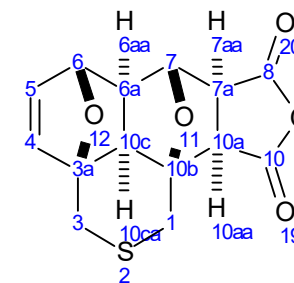

3g

FZ-0414-BOR-16A-C13DEC-1\_001001r

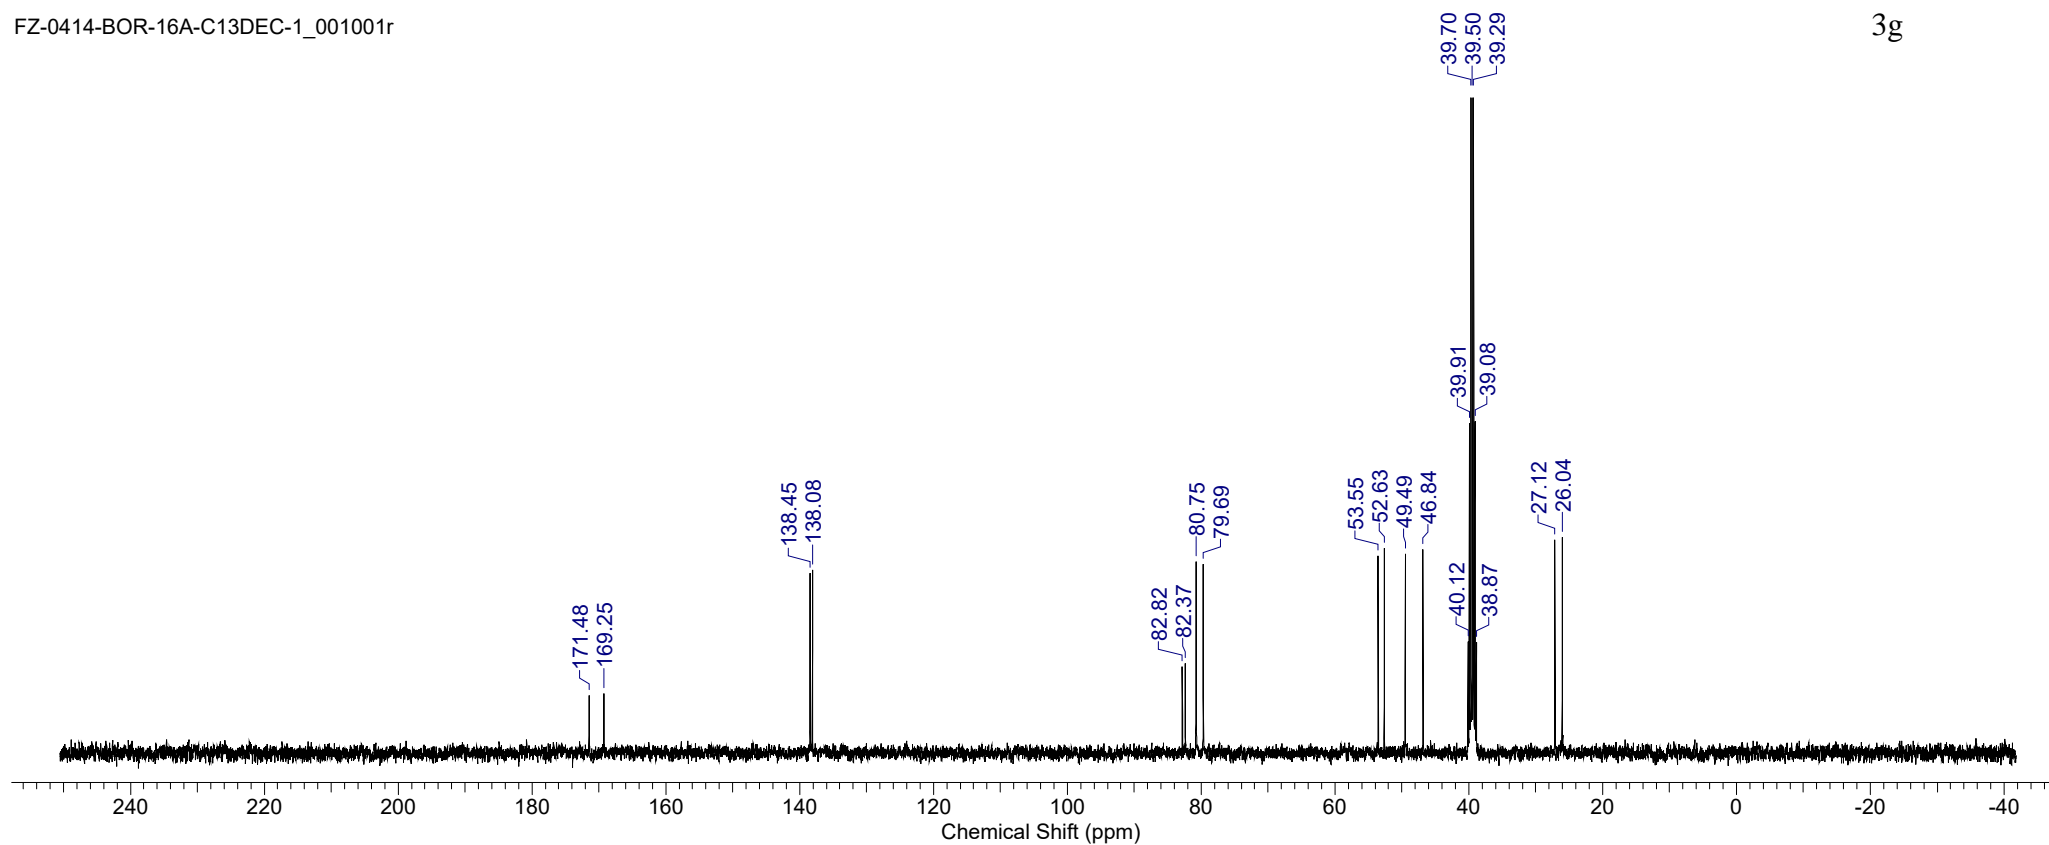

|                                                                 |                    |
|-----------------------------------------------------------------|--------------------|
| <b>Formula</b> C <sub>14</sub> H <sub>12</sub> O <sub>5</sub> S | <b>FW</b> 292.3071 |
|-----------------------------------------------------------------|--------------------|

|                               |                      |                               |                                                           |                             |                      |
|-------------------------------|----------------------|-------------------------------|-----------------------------------------------------------|-----------------------------|----------------------|
| <b>Acquisition Time (sec)</b> | 0.5571               | <b>Comment</b>                | 5 mm QNP 1H/15N/13C/31P Z3379/0400                        | <b>Date</b>                 | 06 May 2014 12:24:32 |
| <b>Date Stamp</b>             | 06 May 2014 12:24:32 | <b>File Name</b>              | C:\USERS\Ja6a534\DESKTOP\FZ-0414-BOR-16A-C13DEC-1_001001r |                             |                      |
| <b>Frequency (MHz)</b>        | 100.61               | <b>Nucleus</b>                | 13C                                                       | <b>Number of Transients</b> | 1072                 |
| <b>Original Points Count</b>  | 16384                | <b>Owner</b>                  | root                                                      | <b>Points Count</b>         | 65536                |
| <b>Receiver Gain</b>          | 32768.00             | <b>SW(cyclical) (Hz)</b>      | 29411.77                                                  | <b>Solvent</b>              | DMSO-d6              |
| <b>Sweep Width (Hz)</b>       | 29411.32             | <b>Temperature (degree C)</b> | 90.000                                                    | <b>Pulse Sequence</b>       | zgpg                 |
|                               |                      |                               |                                                           | <b>Spectrum Offset (Hz)</b> | 10502.3320           |



3g

FZ-0414-BOR-16A-C13DEC-1\_001001r

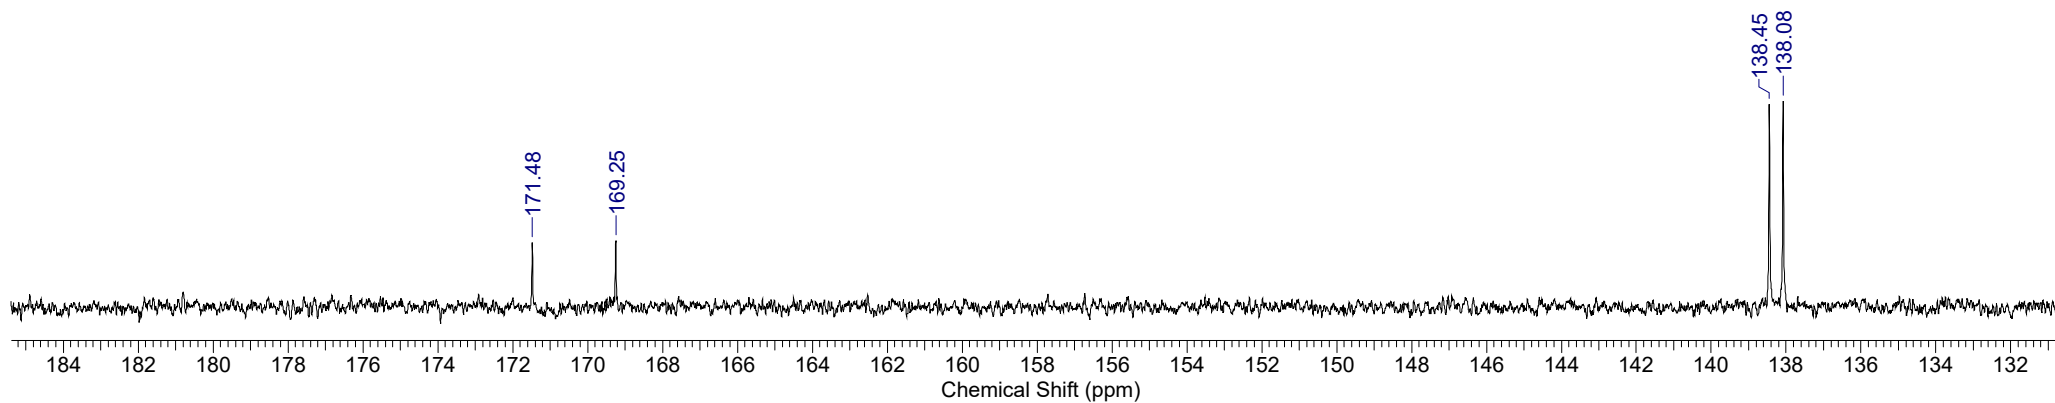

Formula C<sub>14</sub>H<sub>12</sub>O<sub>5</sub>S FW 292.3071

|                        |                      |                        |                                                            |                      |                      |
|------------------------|----------------------|------------------------|------------------------------------------------------------|----------------------|----------------------|
| Acquisition Time (sec) | 0.5571               | Comment                | 5 mm QNP 1H/15N/13C/31P Z3379/0400                         | Date                 | 06 May 2014 12:24:32 |
| Date Stamp             | 06 May 2014 12:24:32 | File Name              | C:\USERS\Jla6a534\DESKTOP\FZ-0414-BOR-16A-C13DEC-1_001001r |                      |                      |
| Frequency (MHz)        | 100.61               | Nucleus                | 13C                                                        | Number of Transients | 1072                 |
| Original Points Count  | 16384                | Owner                  | root                                                       | Points Count         | 65536                |
| Receiver Gain          | 32768.00             | SW(cyclical) (Hz)      | 29411.77                                                   | Solvent              | DMSO-d6              |
| Sweep Width (Hz)       | 29411.32             | Temperature (degree C) | 90.000                                                     | Pulse Sequence       | zgpg                 |
|                        |                      |                        |                                                            | Spectrum Offset (Hz) | 10502.3320           |

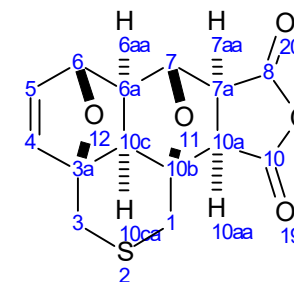

FZ-0414-BOR-16A-C13DEC-1\_001001r

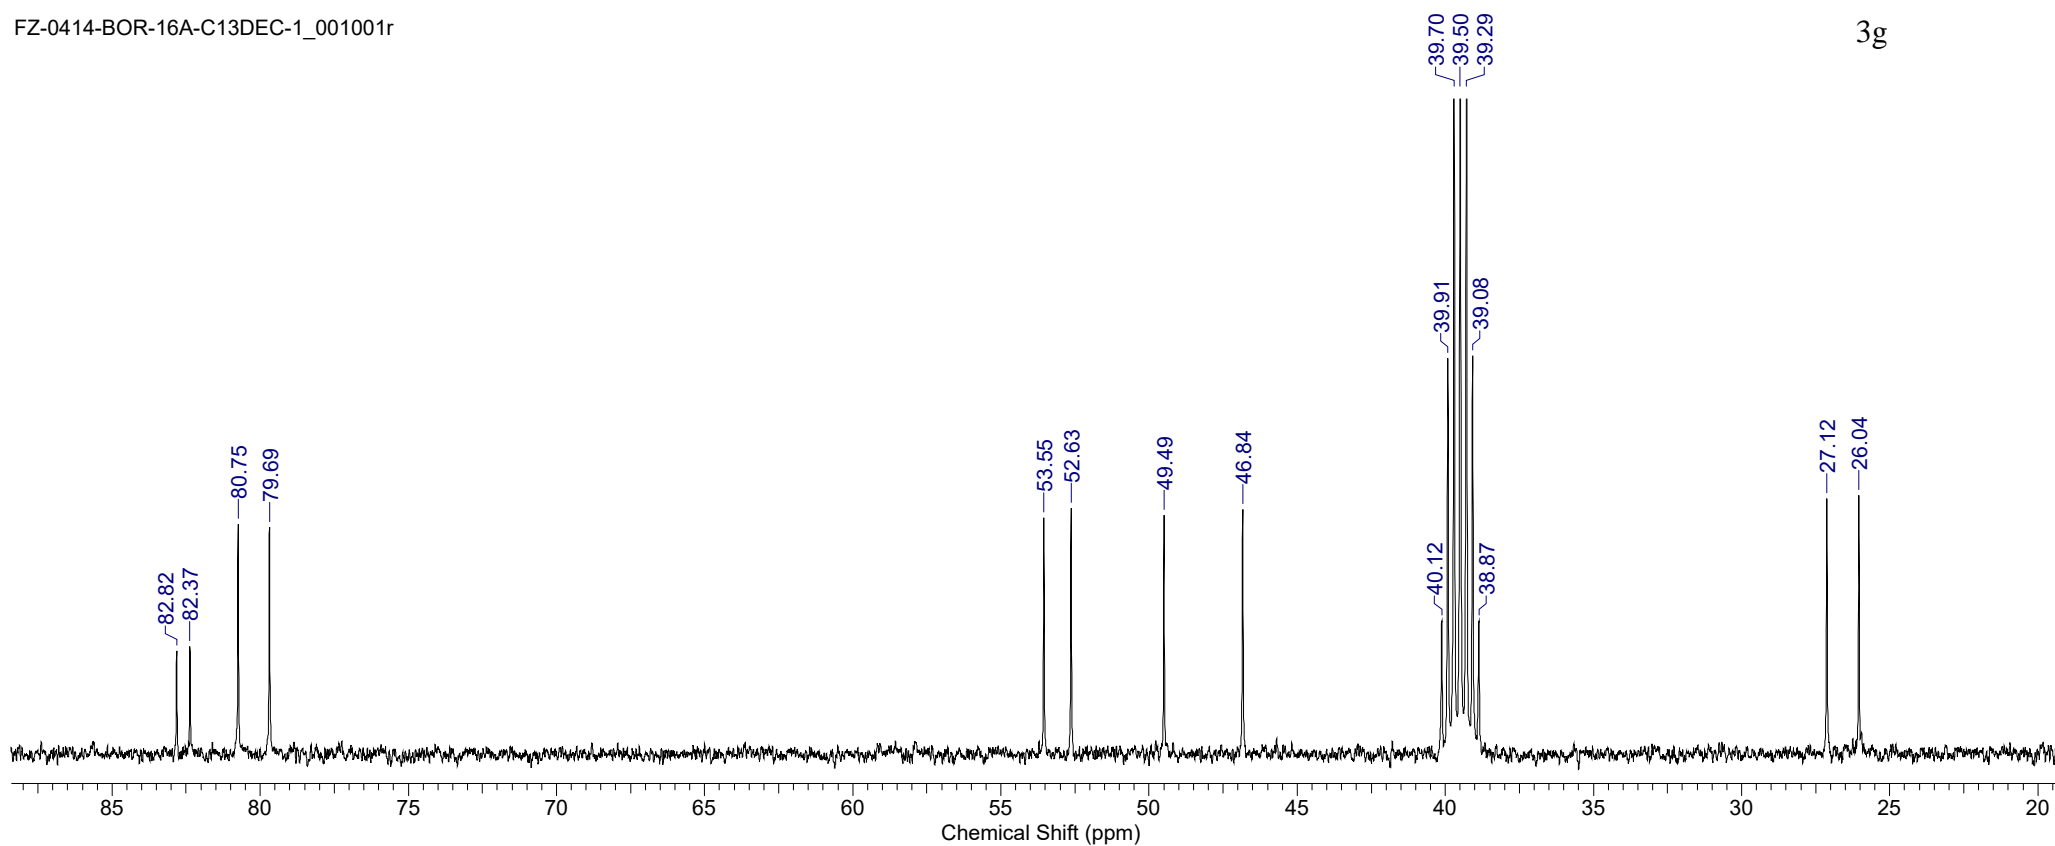

|                                                                              |                    |
|------------------------------------------------------------------------------|--------------------|
| <b>Formula</b> C <sub>20</sub> H <sub>24</sub> N <sub>2</sub> O <sub>6</sub> | <b>FW</b> 388.4144 |
|------------------------------------------------------------------------------|--------------------|

|                                        |                                                           |                                      |                               |
|----------------------------------------|-----------------------------------------------------------|--------------------------------------|-------------------------------|
| <b>Acquisition Time (sec)</b> 1.2111   | <b>Comment</b> single_pulse                               | <b>Date</b> 22 May 2015 10:01:46     | <b>Frequency (MHz)</b> 600.17 |
| <b>Date Stamp</b> 22 May 2015 09:08:29 | <b>File Name</b> C:\USERS\I\аба534\DOWNLOADS\FZ4319-1.JDF | <b>Original Points Count</b> 16384   | <b>Owner</b> delta            |
| <b>Nucleus</b> 1H                      | <b>Number of Transients</b> 8                             | <b>Origin</b> ECA 600                | <b>Solvent</b> CHLOROFORM-d   |
| <b>Points Count</b> 16384              | <b>Pulse Sequence</b> single_pulse.ex2                    | <b>Receiver Gain</b> 30.00           |                               |
| <b>Spectrum Offset (Hz)</b> 3617.9905  | <b>Sweep Width (Hz)</b> 13528.14                          | <b>Temperature (degree C)</b> 19.200 |                               |

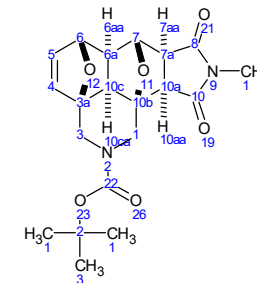

4a

FZ4319-1.JDF

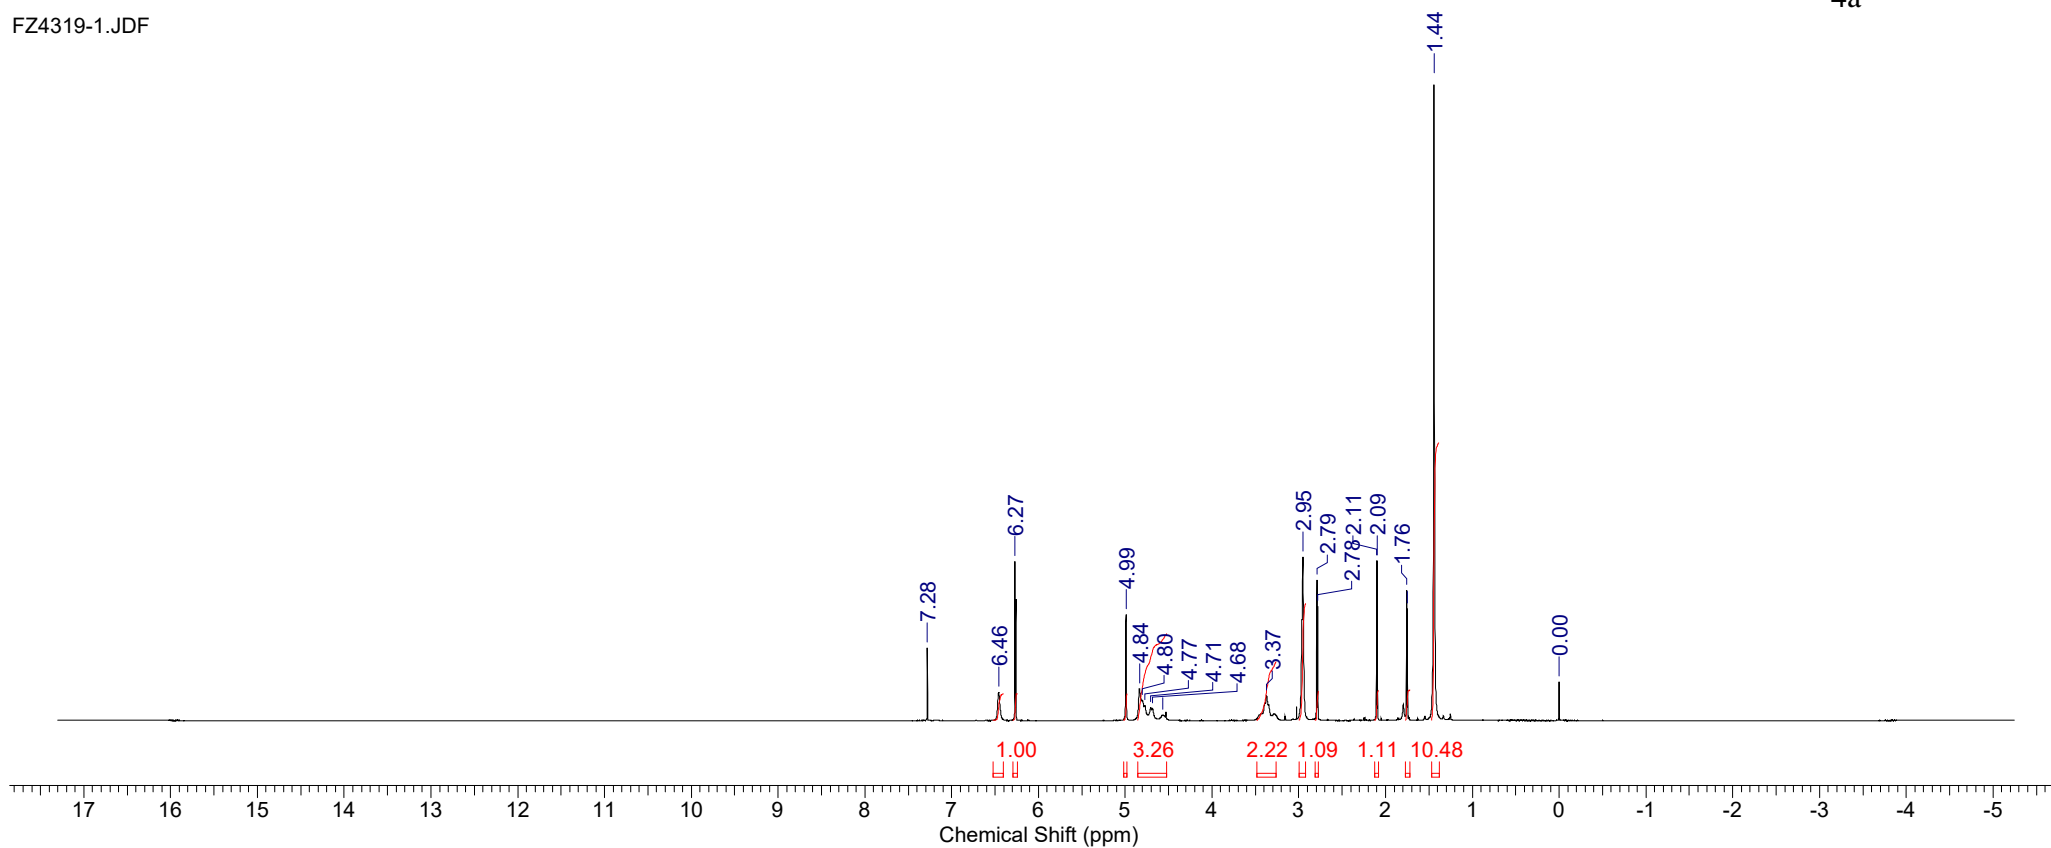

|                                                                              |                    |
|------------------------------------------------------------------------------|--------------------|
| <b>Formula</b> C <sub>20</sub> H <sub>24</sub> N <sub>2</sub> O <sub>6</sub> | <b>FW</b> 388.4144 |
|------------------------------------------------------------------------------|--------------------|

|                                        |                                        |                                                          |                               |
|----------------------------------------|----------------------------------------|----------------------------------------------------------|-------------------------------|
| <b>Acquisition Time (sec)</b> 1.2111   | <b>Comment</b> single_pulse            | <b>Date</b> 22 May 2015 10:01:46                         |                               |
| <b>Date Stamp</b> 22 May 2015 09:08:29 |                                        | <b>File Name</b> C:\USERS\Лабa534\DOWNLOADS\FZ4319-1.JDF | <b>Frequency (MHz)</b> 600.17 |
| <b>Nucleus</b> 1H                      | <b>Number of Transients</b> 8          | <b>Origin</b> ECA 600                                    | <b>Owner</b> delta            |
| <b>Points Count</b> 16384              | <b>Pulse Sequence</b> single_pulse.ex2 | <b>Original Points Count</b> 16384                       | <b>Receiver Gain</b> 30.00    |
| <b>Spectrum Offset (Hz)</b> 3617.9905  | <b>Sweep Width (Hz)</b> 13528.14       | <b>Temperature (degree C)</b> 19.200                     | <b>Solvent</b> CHLOROFORM-d   |

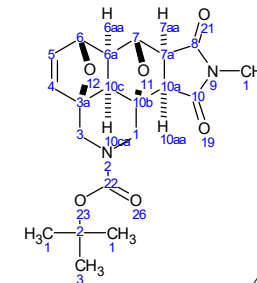

FZ4319-1.JDF

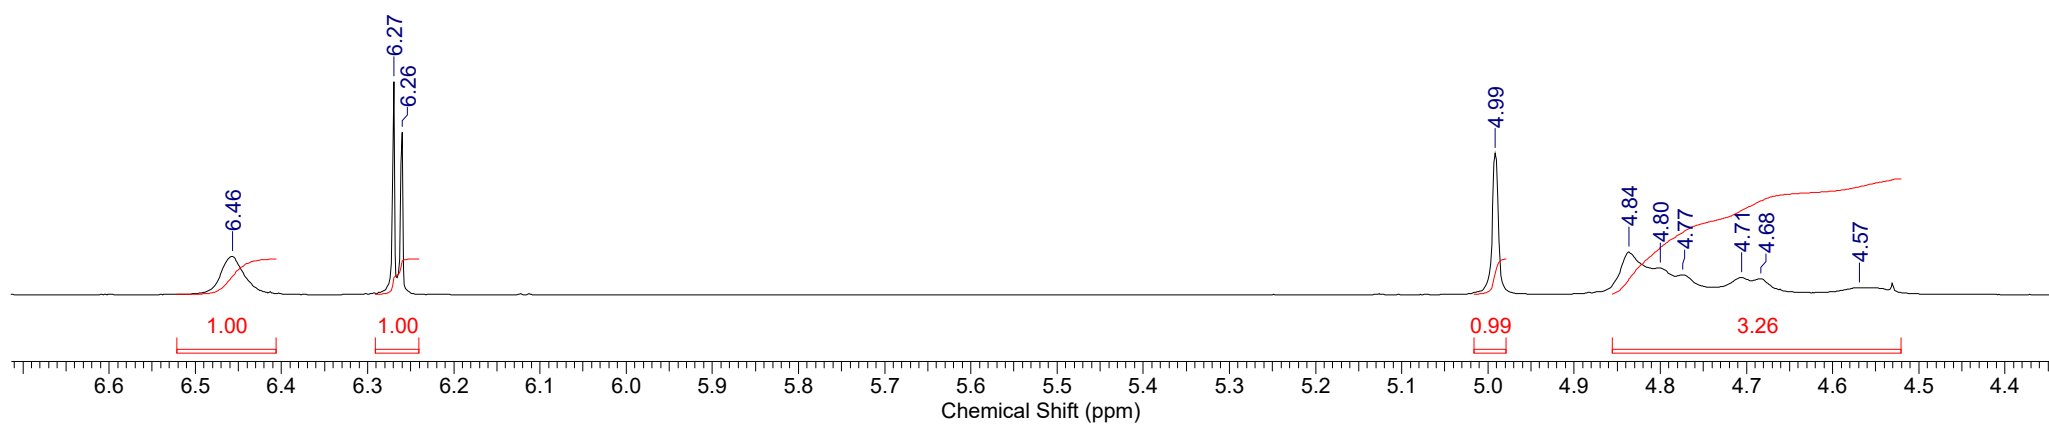

|                                                                              |                    |
|------------------------------------------------------------------------------|--------------------|
| <b>Formula</b> C <sub>20</sub> H <sub>24</sub> N <sub>2</sub> O <sub>6</sub> | <b>FW</b> 388.4144 |
|------------------------------------------------------------------------------|--------------------|

|                                        |                                        |                                                          |                                    |                    |
|----------------------------------------|----------------------------------------|----------------------------------------------------------|------------------------------------|--------------------|
| <b>Acquisition Time (sec)</b> 1.2111   | <b>Comment</b> single_pulse            | <b>Date</b> 22 May 2015 10:01:46                         |                                    |                    |
| <b>Date Stamp</b> 22 May 2015 09:08:29 |                                        | <b>File Name</b> C:\USERS\Лабa534\DOWNLOADS\FZ4319-1.JDF | <b>Frequency (MHz)</b> 600.17      |                    |
| <b>Nucleus</b> 1H                      | <b>Number of Transients</b> 8          | <b>Origin</b> ECA 600                                    | <b>Original Points Count</b> 16384 | <b>Owner</b> delta |
| <b>Points Count</b> 16384              | <b>Pulse Sequence</b> single_pulse.ex2 | <b>Receiver Gain</b> 30.00                               | <b>Solvent</b> CHLOROFORM-d        |                    |
| <b>Spectrum Offset (Hz)</b> 3617.9905  | <b>Sweep Width (Hz)</b> 13528.14       | <b>Temperature (degree C)</b> 19.200                     |                                    |                    |

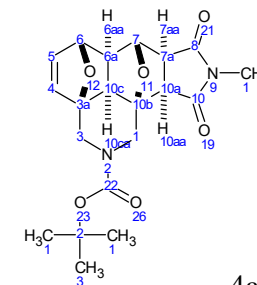

FZ4319-1.JDF

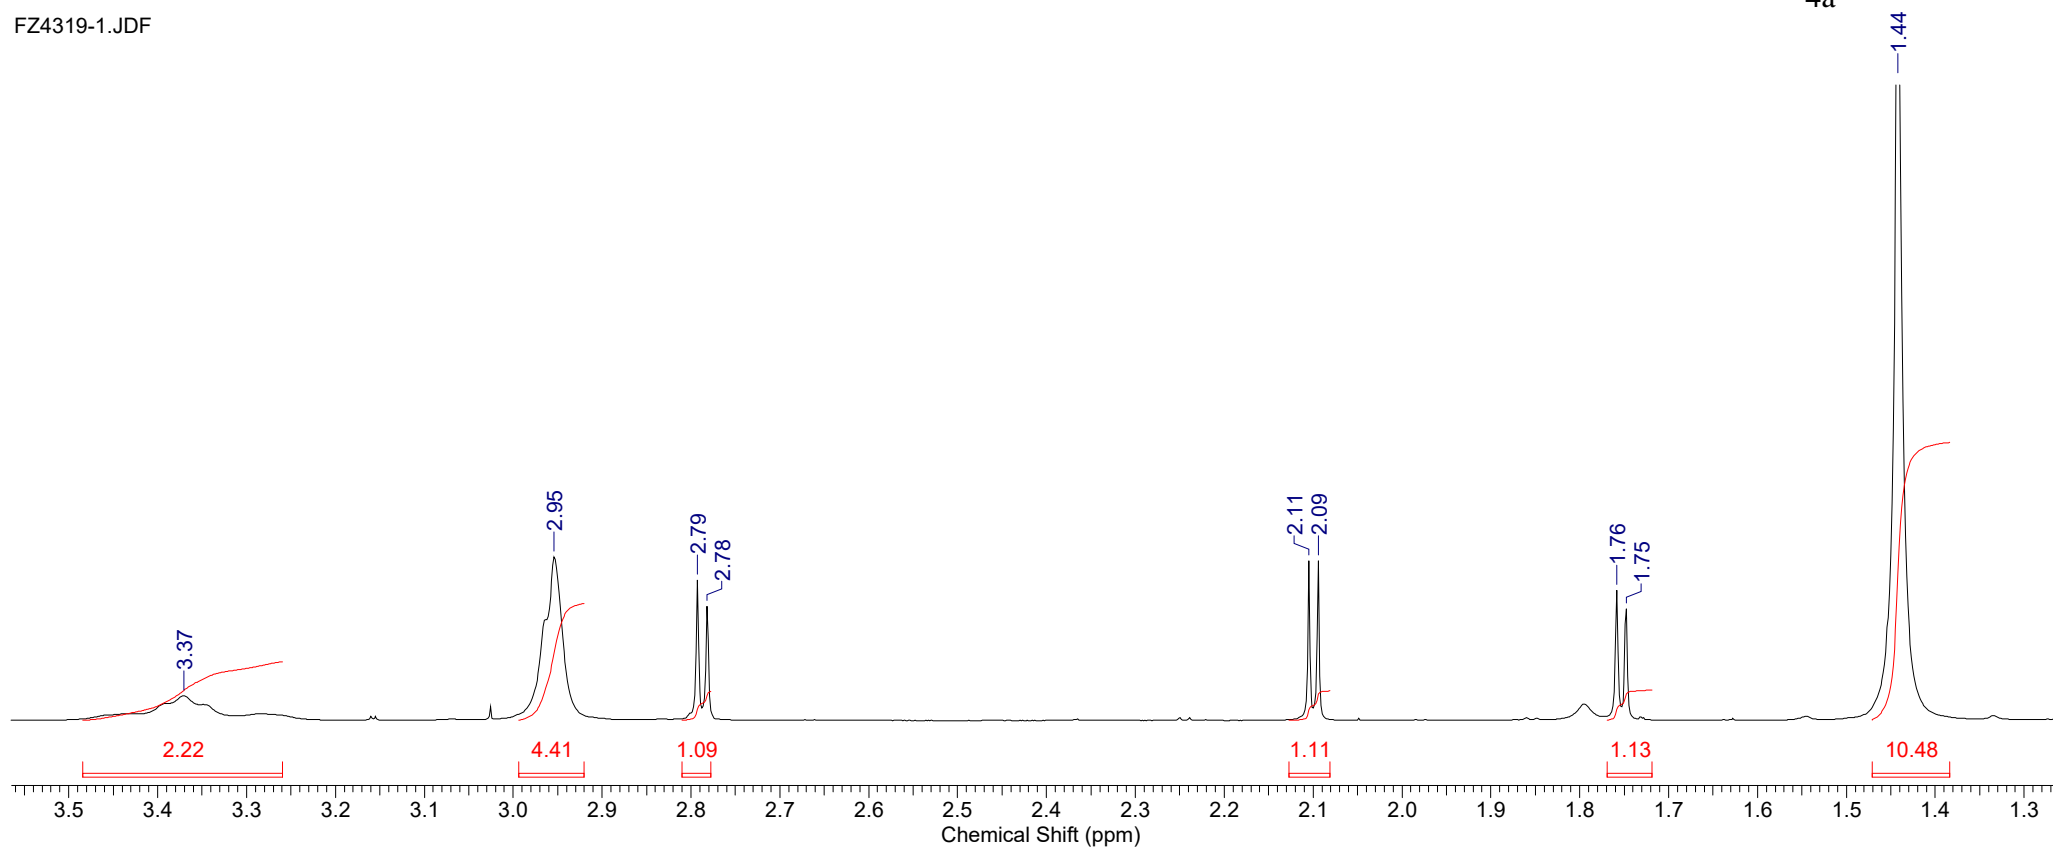



|                                                                              |                    |
|------------------------------------------------------------------------------|--------------------|
| <b>Formula</b> C <sub>20</sub> H <sub>24</sub> N <sub>2</sub> O <sub>6</sub> | <b>FW</b> 388.4144 |
|------------------------------------------------------------------------------|--------------------|

|                                        |                                                                         |                                      |
|----------------------------------------|-------------------------------------------------------------------------|--------------------------------------|
| <b>Acquisition Time (sec)</b> 0.5571   | <b>Comment</b> 5 mm QNP 1H/15N/13C/31P Z3379/0400                       | <b>Date</b> 18 Jun 2015 10:08:00     |
| <b>Date Stamp</b> 18 Jun 2015 10:08:00 | <b>File Name</b> C:\USERS\Jla6a534\DESKTOP\FZ-0615-KV-63-C13DEC_001001r |                                      |
| <b>Frequency (MHz)</b> 100.61          | <b>Nucleus</b> 13C                                                      | <b>Number of Transients</b> 837      |
| <b>Original Points Count</b> 16384     | <b>Owner</b> root                                                       | <b>Points Count</b> 65536            |
| <b>Receiver Gain</b> 32768.00          | <b>SW(cyclical) (Hz)</b> 29411.77                                       | <b>Solvent</b> CHLOROFORM-d          |
| <b>Spectrum Offset (Hz)</b> 9627.8740  | <b>Sweep Width (Hz)</b> 29411.32                                        | <b>Temperature (degree C)</b> 27.000 |

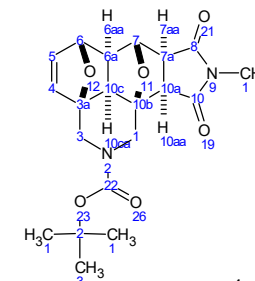

4a

FZ-0615-KV-63-C13DEC\_001001r

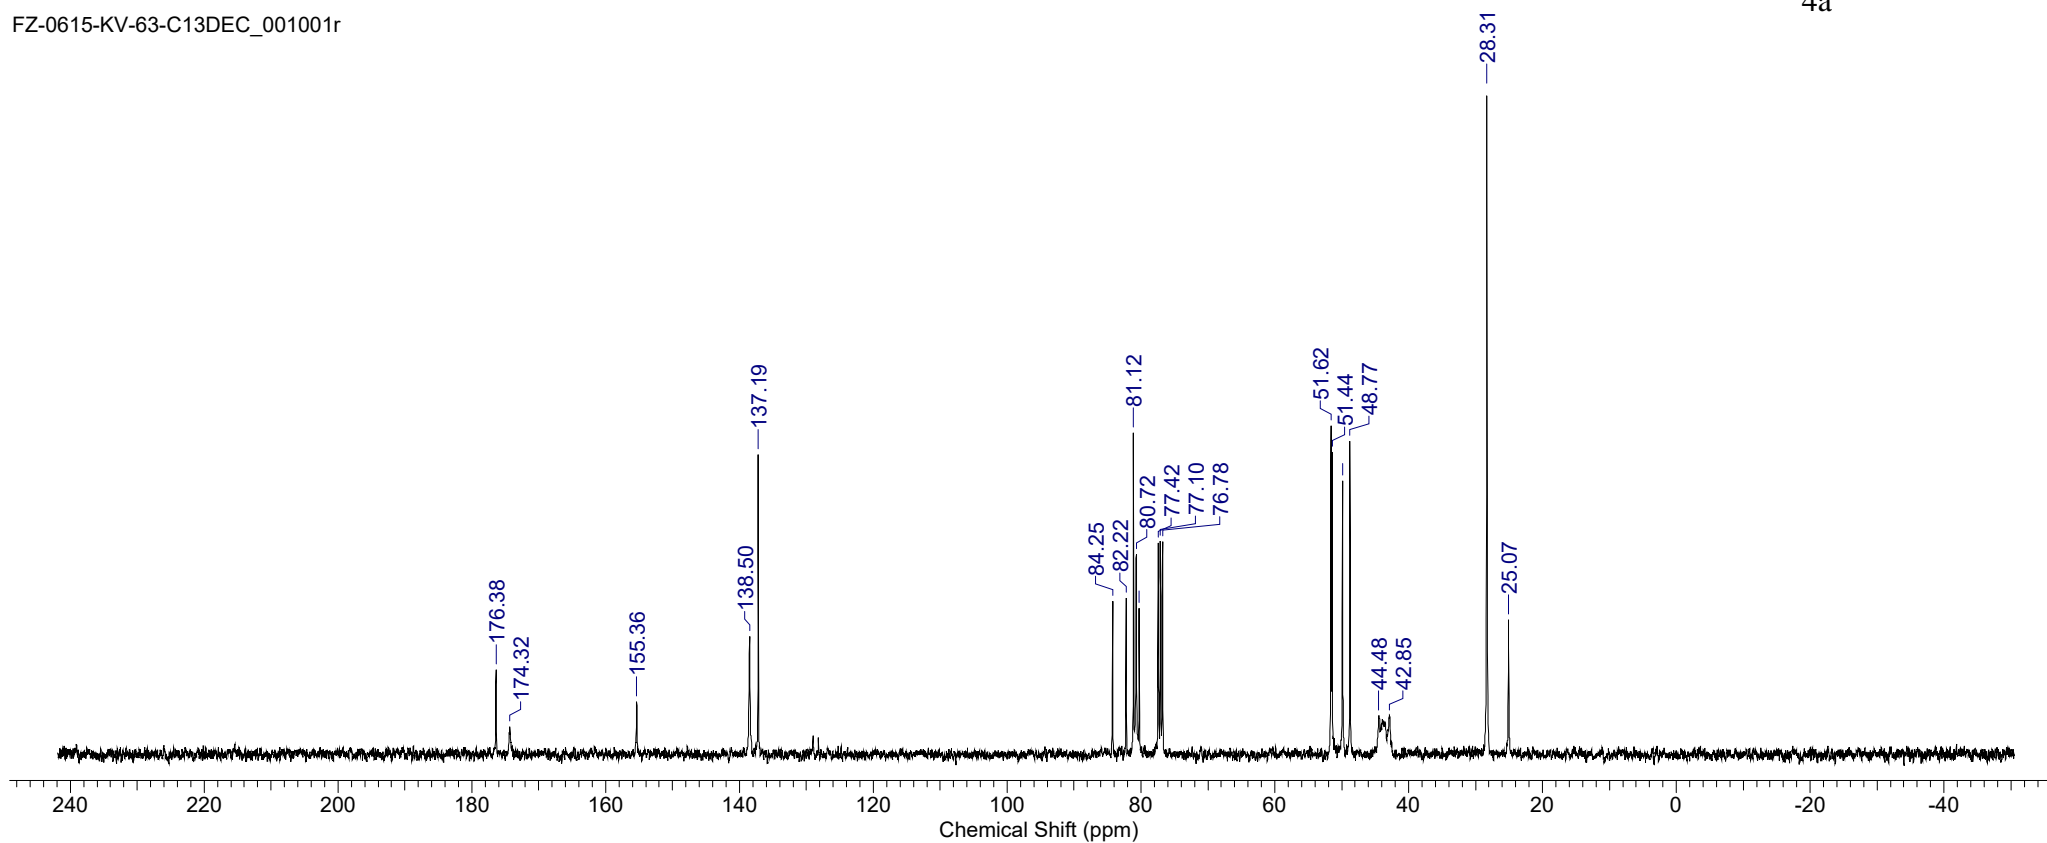

|                                                                              |                    |
|------------------------------------------------------------------------------|--------------------|
| <b>Formula</b> C <sub>20</sub> H <sub>24</sub> N <sub>2</sub> O <sub>6</sub> | <b>FW</b> 388.4144 |
|------------------------------------------------------------------------------|--------------------|

|                                        |                                                                        |                                      |
|----------------------------------------|------------------------------------------------------------------------|--------------------------------------|
| <b>Acquisition Time (sec)</b> 0.5571   | <b>Comment</b> 5 mm QNP 1H/15N/13C/31P Z3379/0400                      | <b>Date</b> 18 Jun 2015 10:08:00     |
| <b>Date Stamp</b> 18 Jun 2015 10:08:00 | <b>File Name</b> C:\USERS\Ja6a534\DESKTOP\FZ-0615-KV-63-C13DEC_001001r |                                      |
| <b>Frequency (MHz)</b> 100.61          | <b>Nucleus</b> 13C                                                     | <b>Number of Transients</b> 837      |
| <b>Original Points Count</b> 16384     | <b>Owner</b> root                                                      | <b>Points Count</b> 65536            |
| <b>Receiver Gain</b> 32768.00          | <b>SW(cyclical) (Hz)</b> 29411.77                                      | <b>Solvent</b> CHLOROFORM-d          |
| <b>Spectrum Offset (Hz)</b> 9627.8740  | <b>Sweep Width (Hz)</b> 29411.32                                       | <b>Temperature (degree C)</b> 27.000 |

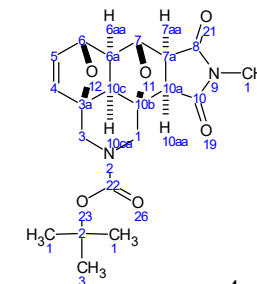

4a

FZ-0615-KV-63-C13DEC\_001001r

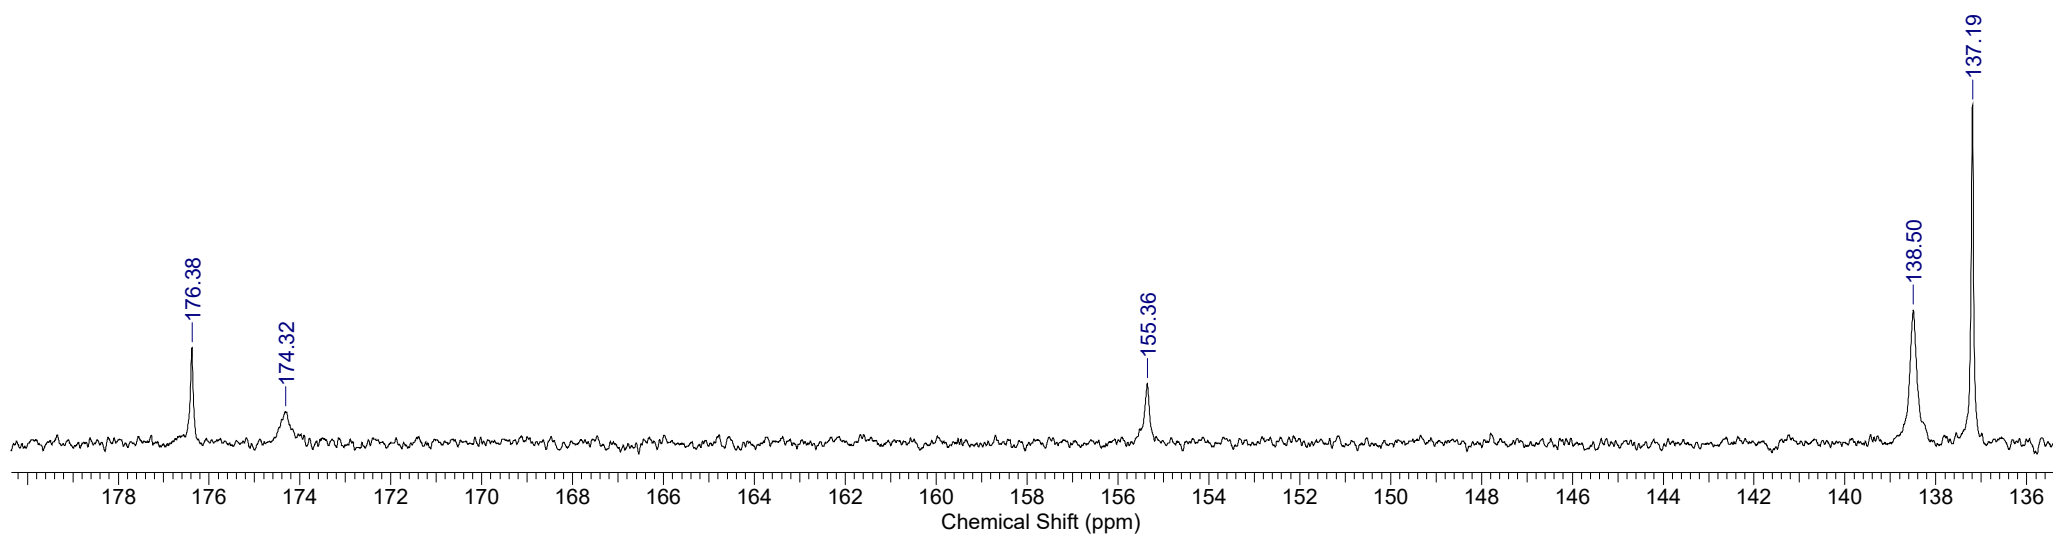

|                                                                              |                    |
|------------------------------------------------------------------------------|--------------------|
| <b>Formula</b> C <sub>20</sub> H <sub>24</sub> N <sub>2</sub> O <sub>6</sub> | <b>FW</b> 388.4144 |
|------------------------------------------------------------------------------|--------------------|

|                               |                      |                          |                                                       |                               |                      |
|-------------------------------|----------------------|--------------------------|-------------------------------------------------------|-------------------------------|----------------------|
| <b>Acquisition Time (sec)</b> | 0.5571               | <b>Comment</b>           | 5 mm QNP 1H/15N/13C/31P Z3379/0400                    | <b>Date</b>                   | 18 Jun 2015 10:08:00 |
| <b>Date Stamp</b>             | 18 Jun 2015 10:08:00 | <b>File Name</b>         | C:\USERS\Ja6a534\DESKTOP\FZ-0615-KV-63-C13DEC_001001r |                               |                      |
| <b>Frequency (MHz)</b>        | 100.61               | <b>Nucleus</b>           | 13C                                                   | <b>Number of Transients</b>   | 837                  |
| <b>Original Points Count</b>  | 16384                | <b>Owner</b>             | root                                                  | <b>Points Count</b>           | 65536                |
| <b>Receiver Gain</b>          | 32768.00             | <b>SW(cyclical) (Hz)</b> | 29411.77                                              | <b>Solvent</b>                | CHLOROFORM-d         |
| <b>Spectrum Offset (Hz)</b>   | 9627.8740            | <b>Sweep Width (Hz)</b>  | 29411.32                                              | <b>Temperature (degree C)</b> | 27.000               |

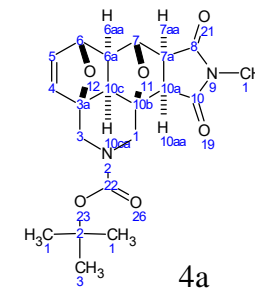

FZ-0615-KV-63-C13DEC\_001001r

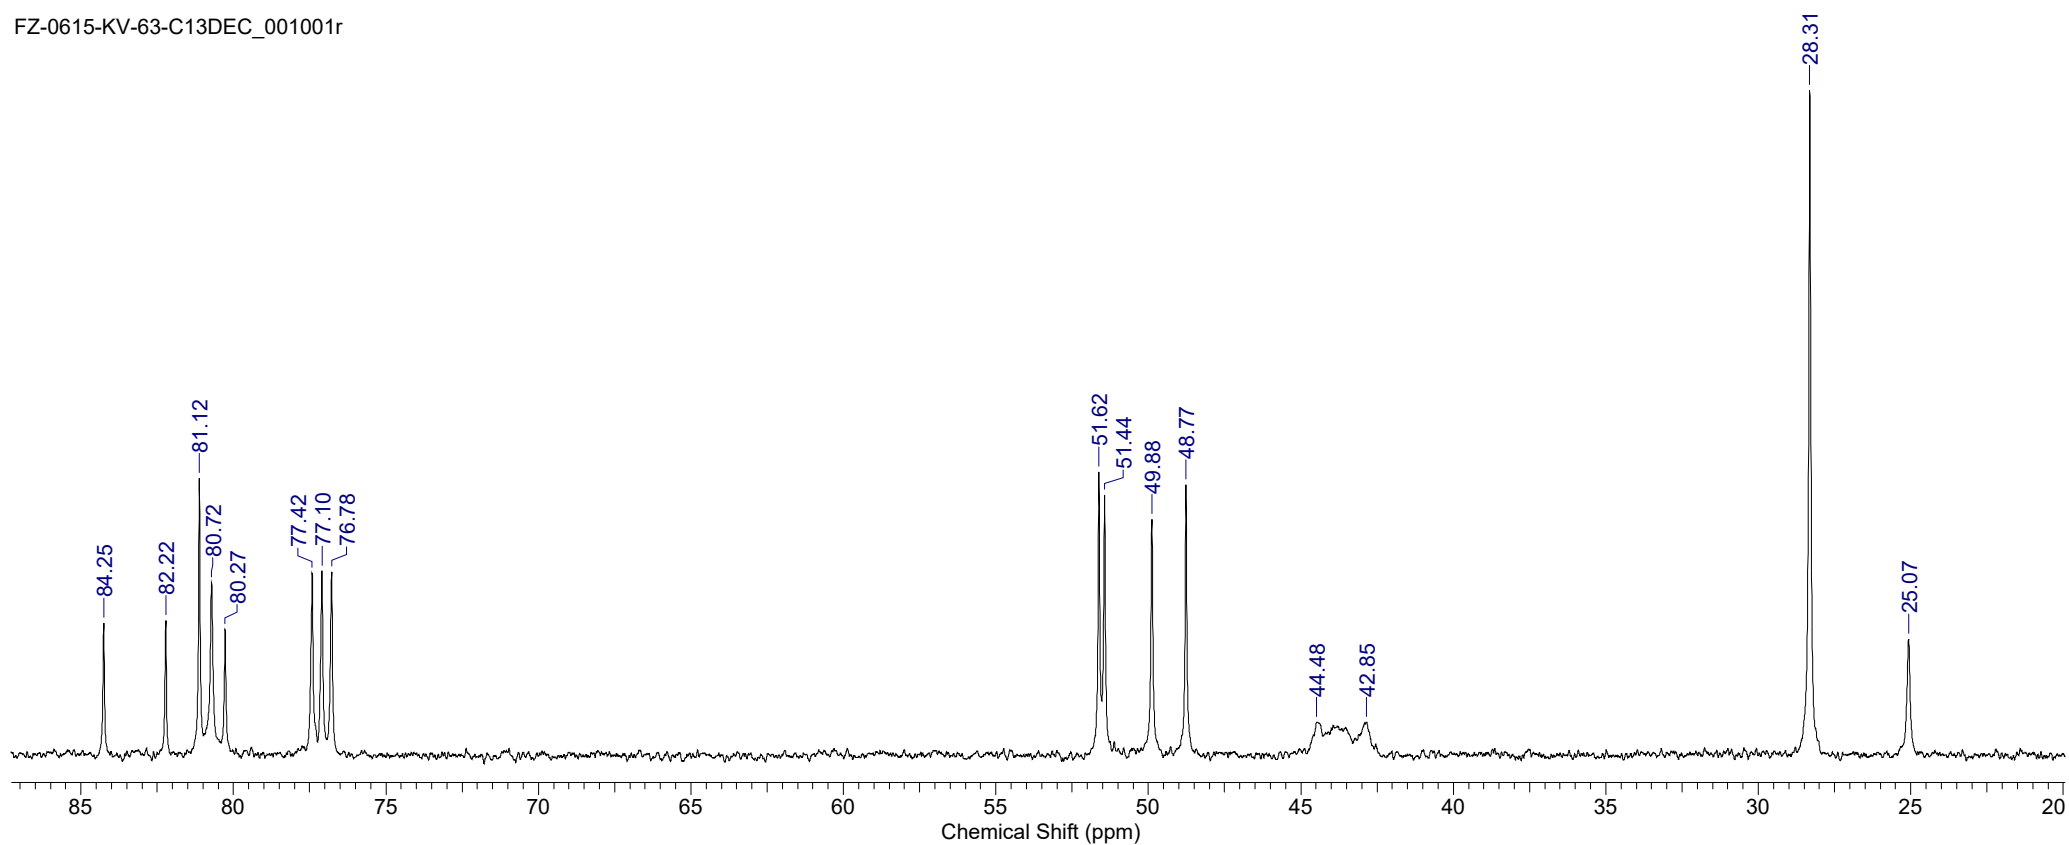

|                                                                              |                    |
|------------------------------------------------------------------------------|--------------------|
| <b>Formula</b> C <sub>17</sub> H <sub>18</sub> N <sub>2</sub> O <sub>6</sub> | <b>FW</b> 346.3346 |
|------------------------------------------------------------------------------|--------------------|

|                                        |                                        |                                                           |                                    |
|----------------------------------------|----------------------------------------|-----------------------------------------------------------|------------------------------------|
| <b>Acquisition Time (sec)</b> 1.2111   | <b>Comment</b> single pulse            | <b>Date</b> 22 Apr 2015 10:55:24                          |                                    |
| <b>Date Stamp</b> 22 Apr 2015 10:01:42 |                                        | <b>File Name</b> C:\USERS\Лаб6а534\DOWNLOADS\FZ4235-1.JDF | <b>Frequency (MHz)</b> 600.17      |
| <b>Nucleus</b> 1H                      | <b>Number of Transients</b> 8          | <b>Origin</b> ECA 600                                     | <b>Original Points Count</b> 16384 |
| <b>Points Count</b> 16384              | <b>Pulse Sequence</b> single_pulse.ex2 | <b>Receiver Gain</b> 38.00                                | <b>Owner</b> delta                 |
| <b>Spectrum Offset (Hz)</b> 3614.6875  | <b>Sweep Width (Hz)</b> 13528.14       | <b>Temperature (degree C)</b> 21.000                      | <b>Solvent</b> CHLOROFORM-d        |

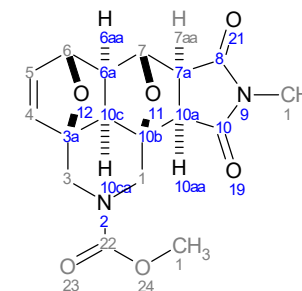

4b

FZ4235-1 E C метилом.ESP

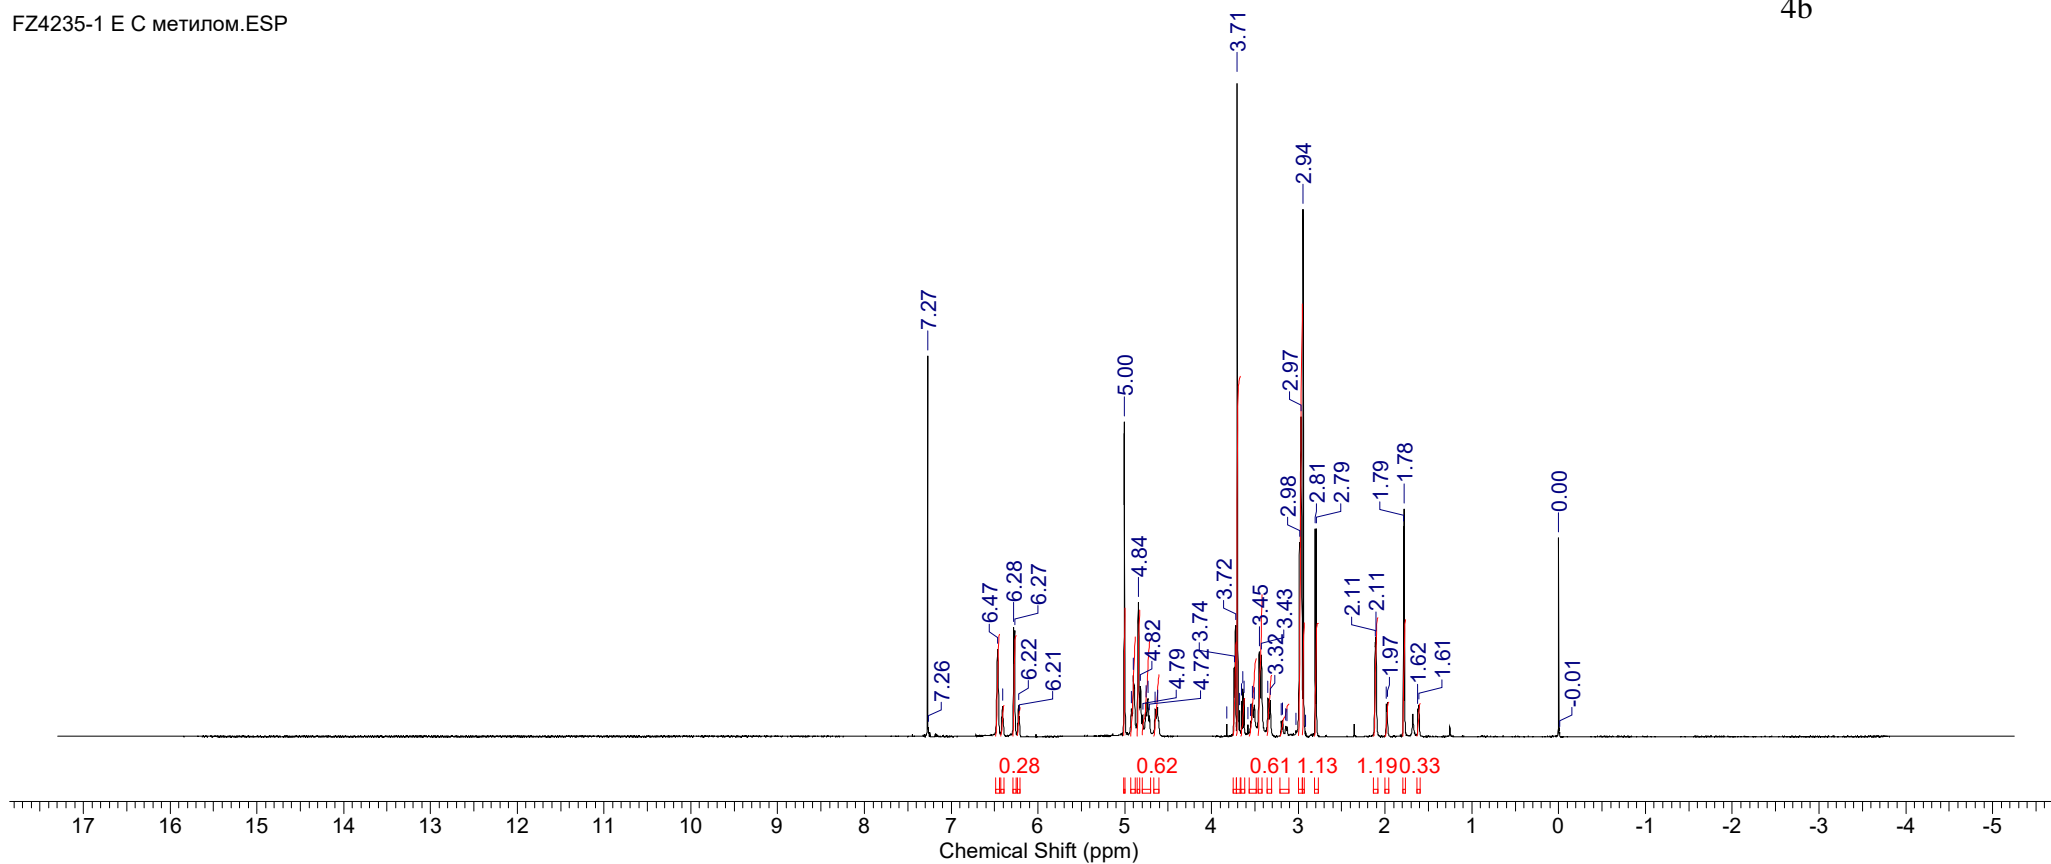

Formula C<sub>17</sub>H<sub>18</sub>N<sub>2</sub>O<sub>6</sub> FW 346.3346

|                        |                      |                      |                                         |                        |                      |                       |              |
|------------------------|----------------------|----------------------|-----------------------------------------|------------------------|----------------------|-----------------------|--------------|
| Acquisition Time (sec) | 1.2111               | Comment              | single pulse                            | Date                   | 22 Apr 2015 10:55:24 | Frequency (MHz)       | 600.17       |
| Date Stamp             | 22 Apr 2015 10:01:42 | File Name            | C:\USERS\Лабa534\DOWNLOADS\FZ4235-1.JDF |                        |                      | Owner                 | delta        |
| Nucleus                | 1H                   | Number of Transients | 8                                       | Origin                 | ECA 600              | Original Points Count | 16384        |
| Points Count           | 16384                | Pulse Sequence       | single_pulse.ex2                        | Receiver Gain          | 38.00                | Solvent               | CHLOROFORM-d |
| Spectrum Offset (Hz)   | 3614.6875            | Sweep Width (Hz)     | 13528.14                                | Temperature (degree C) | 21.000               |                       |              |

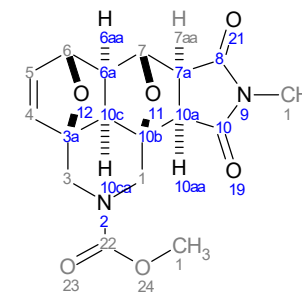

4b

FZ4235-1 E C метилом.ESP

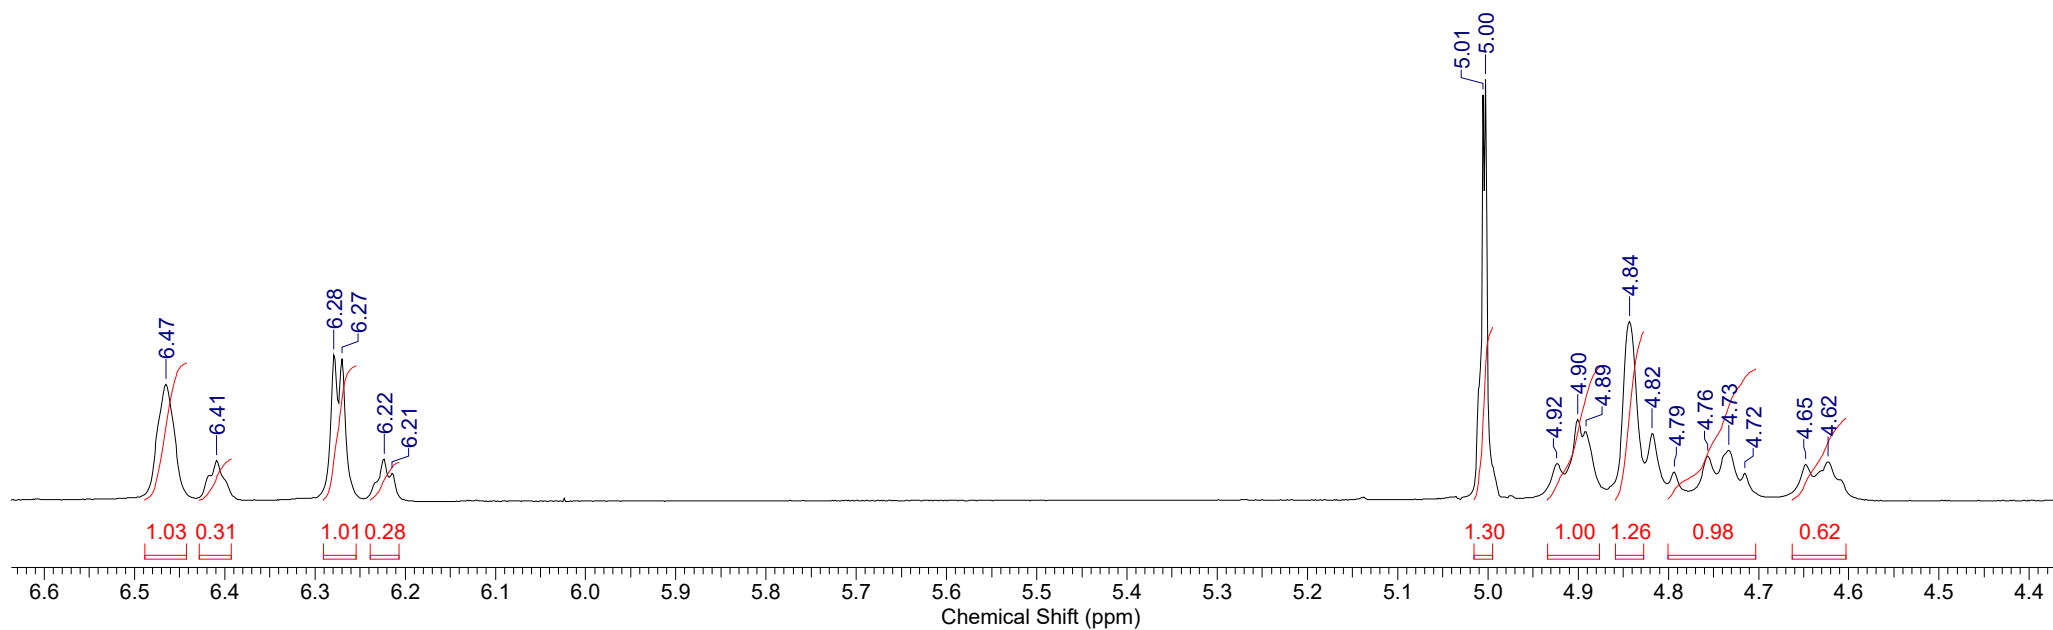

|                                                                              |                    |
|------------------------------------------------------------------------------|--------------------|
| <b>Formula</b> C <sub>17</sub> H <sub>18</sub> N <sub>2</sub> O <sub>6</sub> | <b>FW</b> 346.3346 |
|------------------------------------------------------------------------------|--------------------|

|                                        |                                        |                                                           |                               |
|----------------------------------------|----------------------------------------|-----------------------------------------------------------|-------------------------------|
| <b>Acquisition Time (sec)</b> 1.2111   | <b>Comment</b> single pulse            | <b>Date</b> 22 Apr 2015 10:55:24                          |                               |
| <b>Date Stamp</b> 22 Apr 2015 10:01:42 |                                        | <b>File Name</b> C:\USERS\Лаб6а534\DOWNLOADS\FZ4235-1.JDF | <b>Frequency (MHz)</b> 600.17 |
| <b>Nucleus</b> 1H                      | <b>Number of Transients</b> 8          | <b>Origin</b> ECA 600                                     | <b>Owner</b> delta            |
| <b>Points Count</b> 16384              | <b>Pulse Sequence</b> single_pulse.ex2 | <b>Original Points Count</b> 16384                        | <b>Receiver Gain</b> 38.00    |
| <b>Spectrum Offset (Hz)</b> 3614.6875  | <b>Sweep Width (Hz)</b> 13528.14       | <b>Temperature (degree C)</b> 21.000                      | <b>Solvent</b> CHLOROFORM-d   |



4b

FZ4235-1 E C мети.ESP

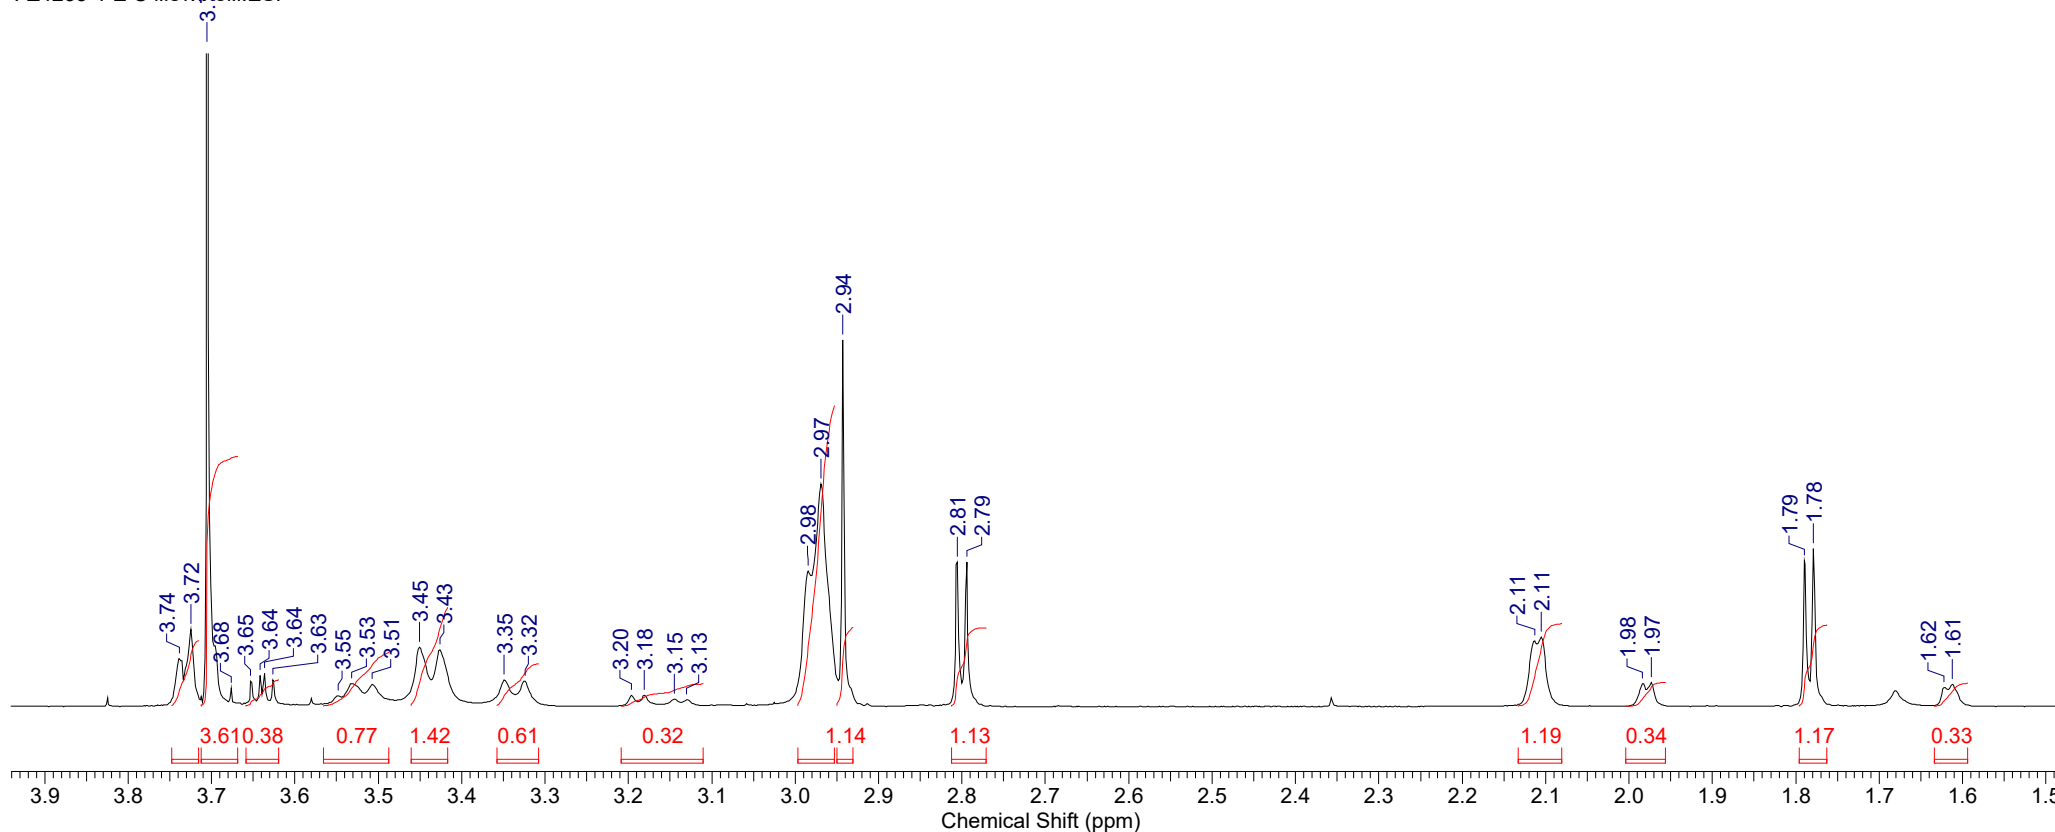

|                                                                              |                    |
|------------------------------------------------------------------------------|--------------------|
| <b>Formula</b> C <sub>17</sub> H <sub>18</sub> N <sub>2</sub> O <sub>6</sub> | <b>FW</b> 346.3346 |
|------------------------------------------------------------------------------|--------------------|

|                                        |                                                          |                                        |
|----------------------------------------|----------------------------------------------------------|----------------------------------------|
| <b>Acquisition Time (sec)</b> 0.6921   | <b>Comment</b> single pulse decoupled gated NOE          | <b>Date</b> 05 May 2015 11:08:04       |
| <b>Date Stamp</b> 05 May 2015 10:14:33 | <b>File Name</b> C:\USERS\Лабa534\DOWNLOADS\FZ4269-1.JDF |                                        |
| <b>Frequency (MHz)</b> 150.91          | <b>Nucleus</b> 13C                                       | <b>Number of Transients</b> 100        |
| <b>Original Points Count</b> 32768     | <b>Owner</b> delta                                       | <b>Points Count</b> 32768              |
| <b>Receiver Gain</b> 52.00             | <b>Solvent</b> CHLOROFORM-d                              | <b>Pulse Sequence</b> single pulse dec |
| <b>Sweep Width (Hz)</b> 47348.49       | <b>Temperature (degree C)</b> 21.100                     | <b>Spectrum Offset (Hz)</b> 15091.3428 |

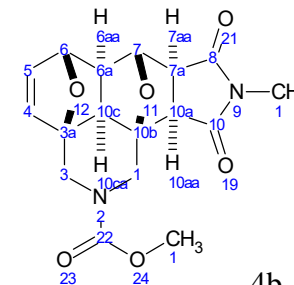

FZ4269-1 E с метилом.ESP

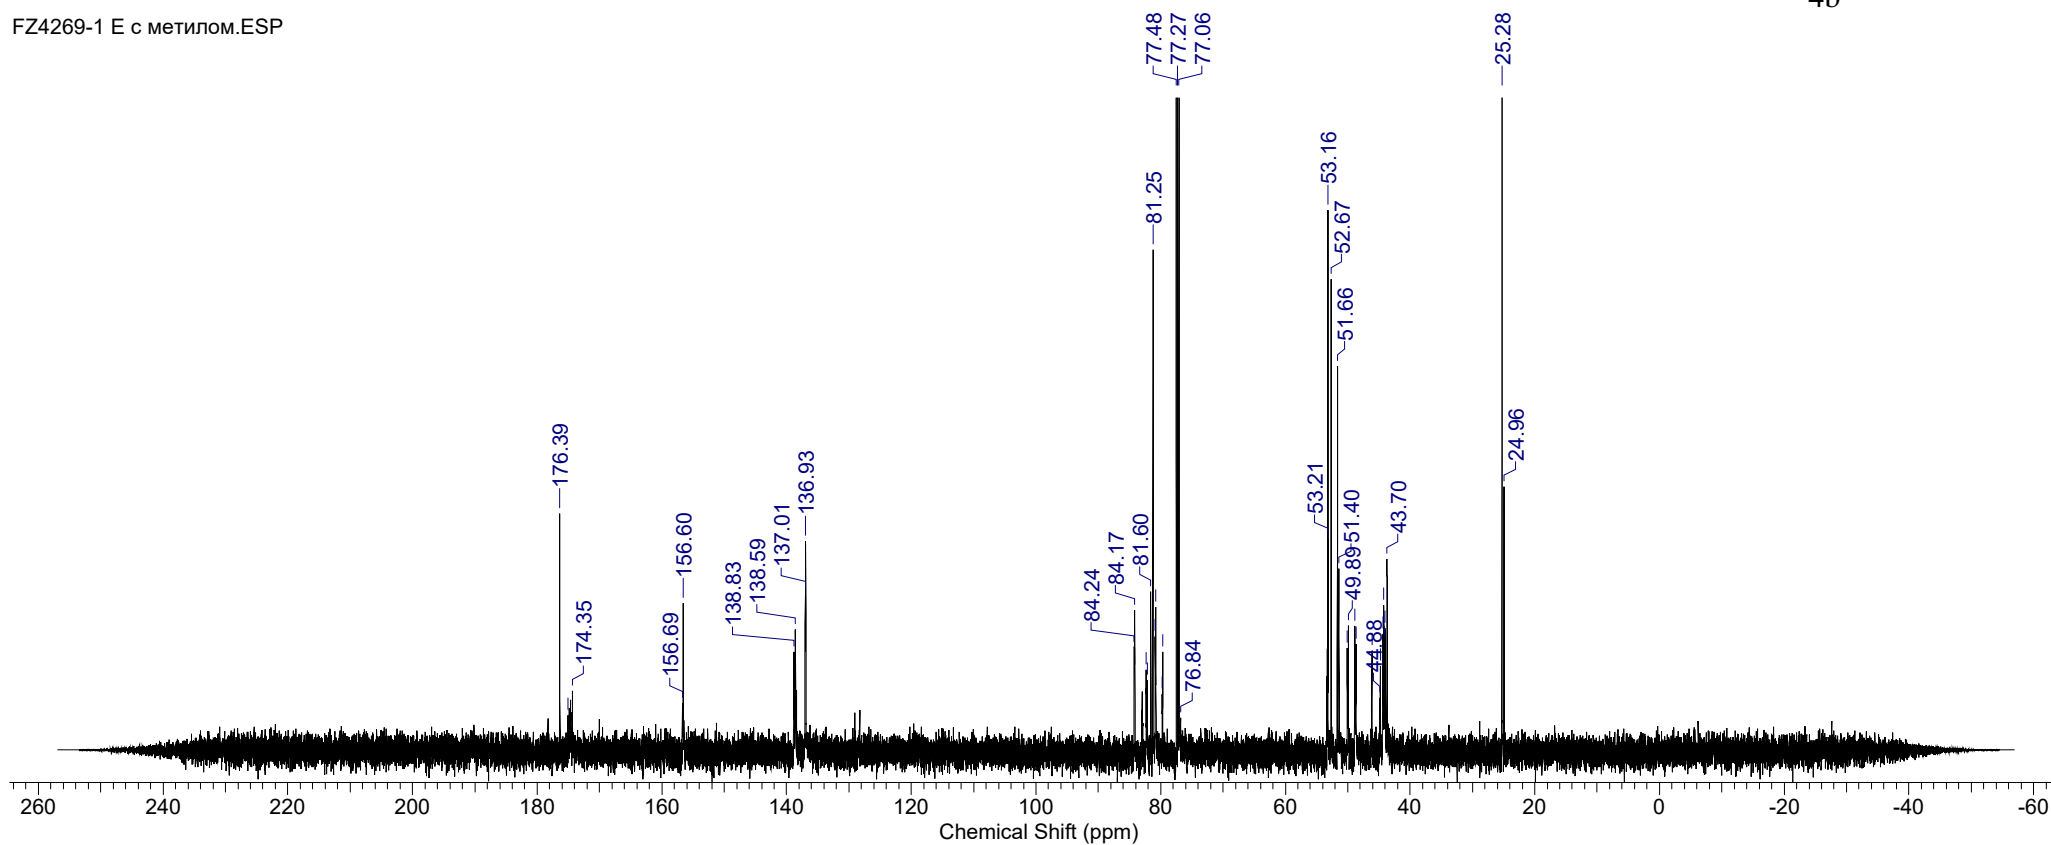

|                                                                              |                    |
|------------------------------------------------------------------------------|--------------------|
| <b>Formula</b> C <sub>17</sub> H <sub>18</sub> N <sub>2</sub> O <sub>6</sub> | <b>FW</b> 346.3346 |
|------------------------------------------------------------------------------|--------------------|

|                                        |                                                          |                                        |
|----------------------------------------|----------------------------------------------------------|----------------------------------------|
| <b>Acquisition Time (sec)</b> 0.6921   | <b>Comment</b> single pulse decoupled gated NOE          | <b>Date</b> 05 May 2015 11:08:04       |
| <b>Date Stamp</b> 05 May 2015 10:14:33 | <b>File Name</b> C:\USERS\Лабa534\DOWNLOADS\FZ4269-1.JDF |                                        |
| <b>Frequency (MHz)</b> 150.91          | <b>Nucleus</b> 13C                                       | <b>Number of Transients</b> 100        |
| <b>Original Points Count</b> 32768     | <b>Owner</b> delta                                       | <b>Points Count</b> 32768              |
| <b>Receiver Gain</b> 52.00             | <b>Solvent</b> CHLOROFORM-d                              | <b>Pulse Sequence</b> single pulse dec |
| <b>Sweep Width (Hz)</b> 47348.49       | <b>Temperature (degree C)</b> 21.100                     | <b>Spectrum Offset (Hz)</b> 15091.3428 |

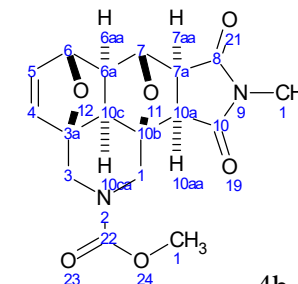

FZ4269-1 E с метилом.ESP

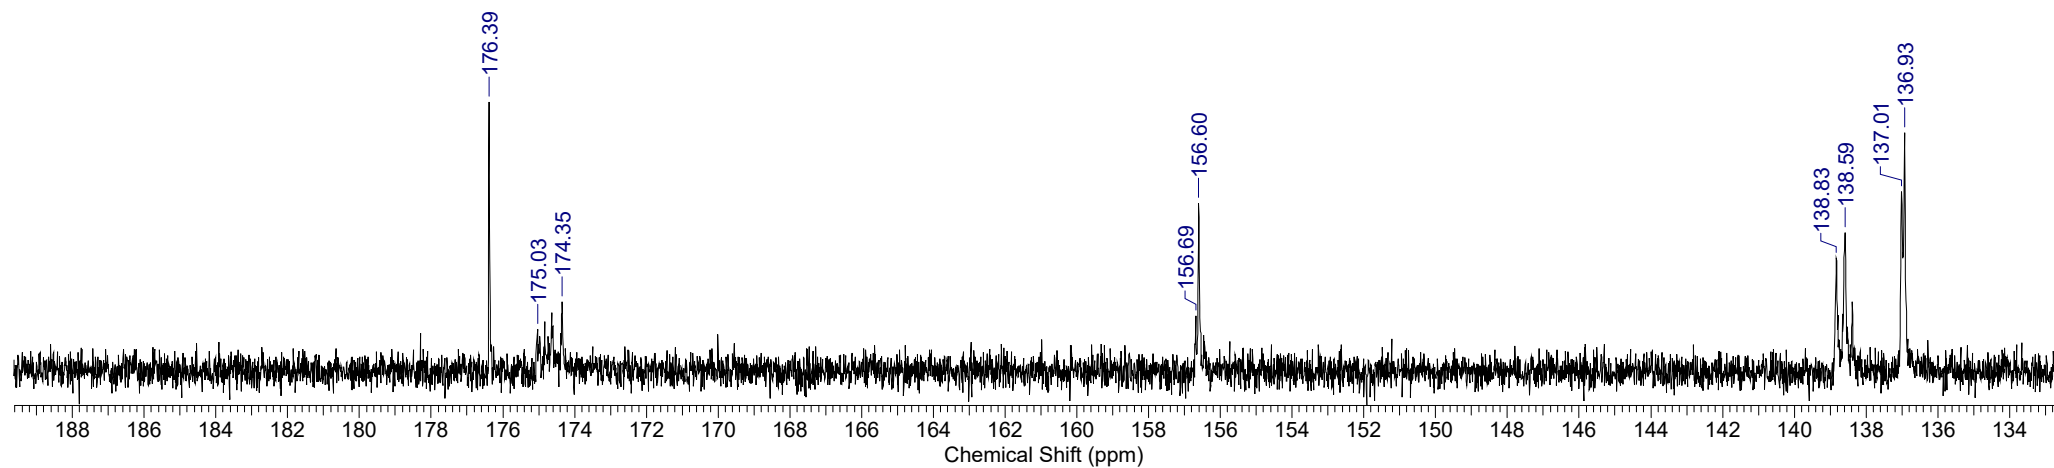



Formula C<sub>17</sub>H<sub>18</sub>N<sub>2</sub>O<sub>6</sub> FW 346.3346

|                        |                      |                        |                                         |                      |                      |
|------------------------|----------------------|------------------------|-----------------------------------------|----------------------|----------------------|
| Acquisition Time (sec) | 0.6921               | Comment                | single pulse decoupled gated NOE        | Date                 | 05 May 2015 11:08:04 |
| Date Stamp             | 05 May 2015 10:14:33 | File Name              | C:\USERS\Лаба534\DOWNLOADS\FZ4269-1.JDF |                      |                      |
| Frequency (MHz)        | 150.91               | Nucleus                | 13C                                     | Origin               | ECA 600              |
| Original Points Count  | 32768                | Owner                  | delta                                   | Points Count         | 32768                |
| Receiver Gain          | 52.00                | Solvent                | CHLOROFORM-d                            | Pulse Sequence       | single pulse dec     |
| Sweep Width (Hz)       | 47348.49             | Temperature (degree C) | 21.100                                  | Spectrum Offset (Hz) | 15091.3428           |

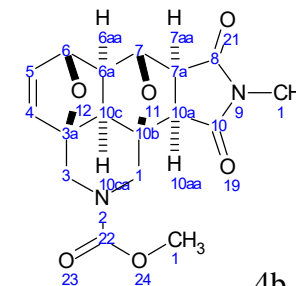

FZ4269-1 E с метилом.ESP

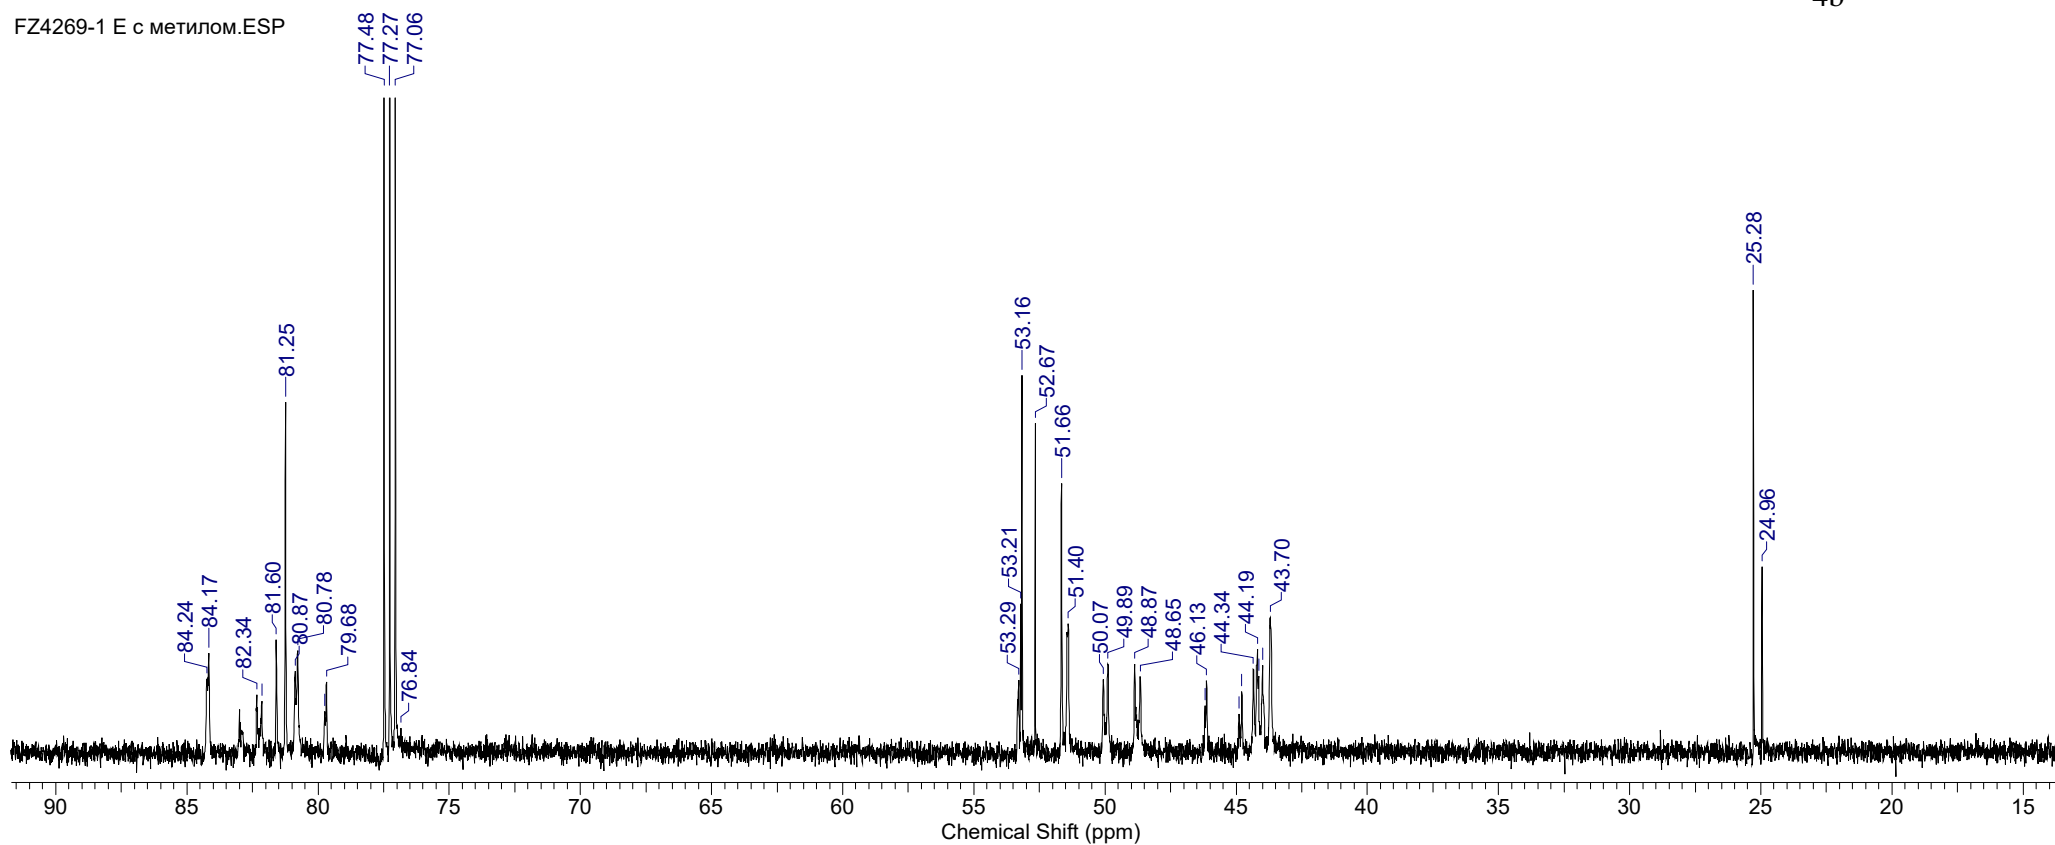

|                                                                              |                    |
|------------------------------------------------------------------------------|--------------------|
| <b>Formula</b> C <sub>22</sub> H <sub>20</sub> N <sub>2</sub> O <sub>5</sub> | <b>FW</b> 392.4046 |
|------------------------------------------------------------------------------|--------------------|

|                                                          |                                    |                                       |                                        |
|----------------------------------------------------------|------------------------------------|---------------------------------------|----------------------------------------|
| <b>Acquisition Time (sec)</b> 1.2111                     | <b>Comment</b> single_pulse        | <b>Date</b> 02 Apr 2015 12:21:25      | <b>Date Stamp</b> 02 Apr 2015 11:27:26 |
| <b>File Name</b> C:\USERS\Лабa534\DOWNLOADS\FZ4171-1.JDF | <b>Frequency (MHz)</b> 600.17      | <b>Nucleus</b> 1H                     | <b>Number of Transients</b> 8          |
| <b>Origin</b> ECA 600                                    | <b>Original Points Count</b> 16384 | <b>Owner</b> delta                    | <b>Points Count</b> 16384              |
| <b>Receiver Gain</b> 38.00                               | <b>Solvent</b> DMSO-d6             | <b>Spectrum Offset (Hz)</b> 3623.7708 | <b>Sweep Width (Hz)</b> 13528.14       |
|                                                          |                                    |                                       | <b>Pulse Sequence</b> single_pulse.ex2 |

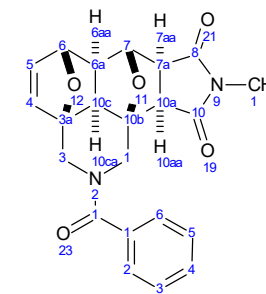

FZ4171-1.ESP

4d

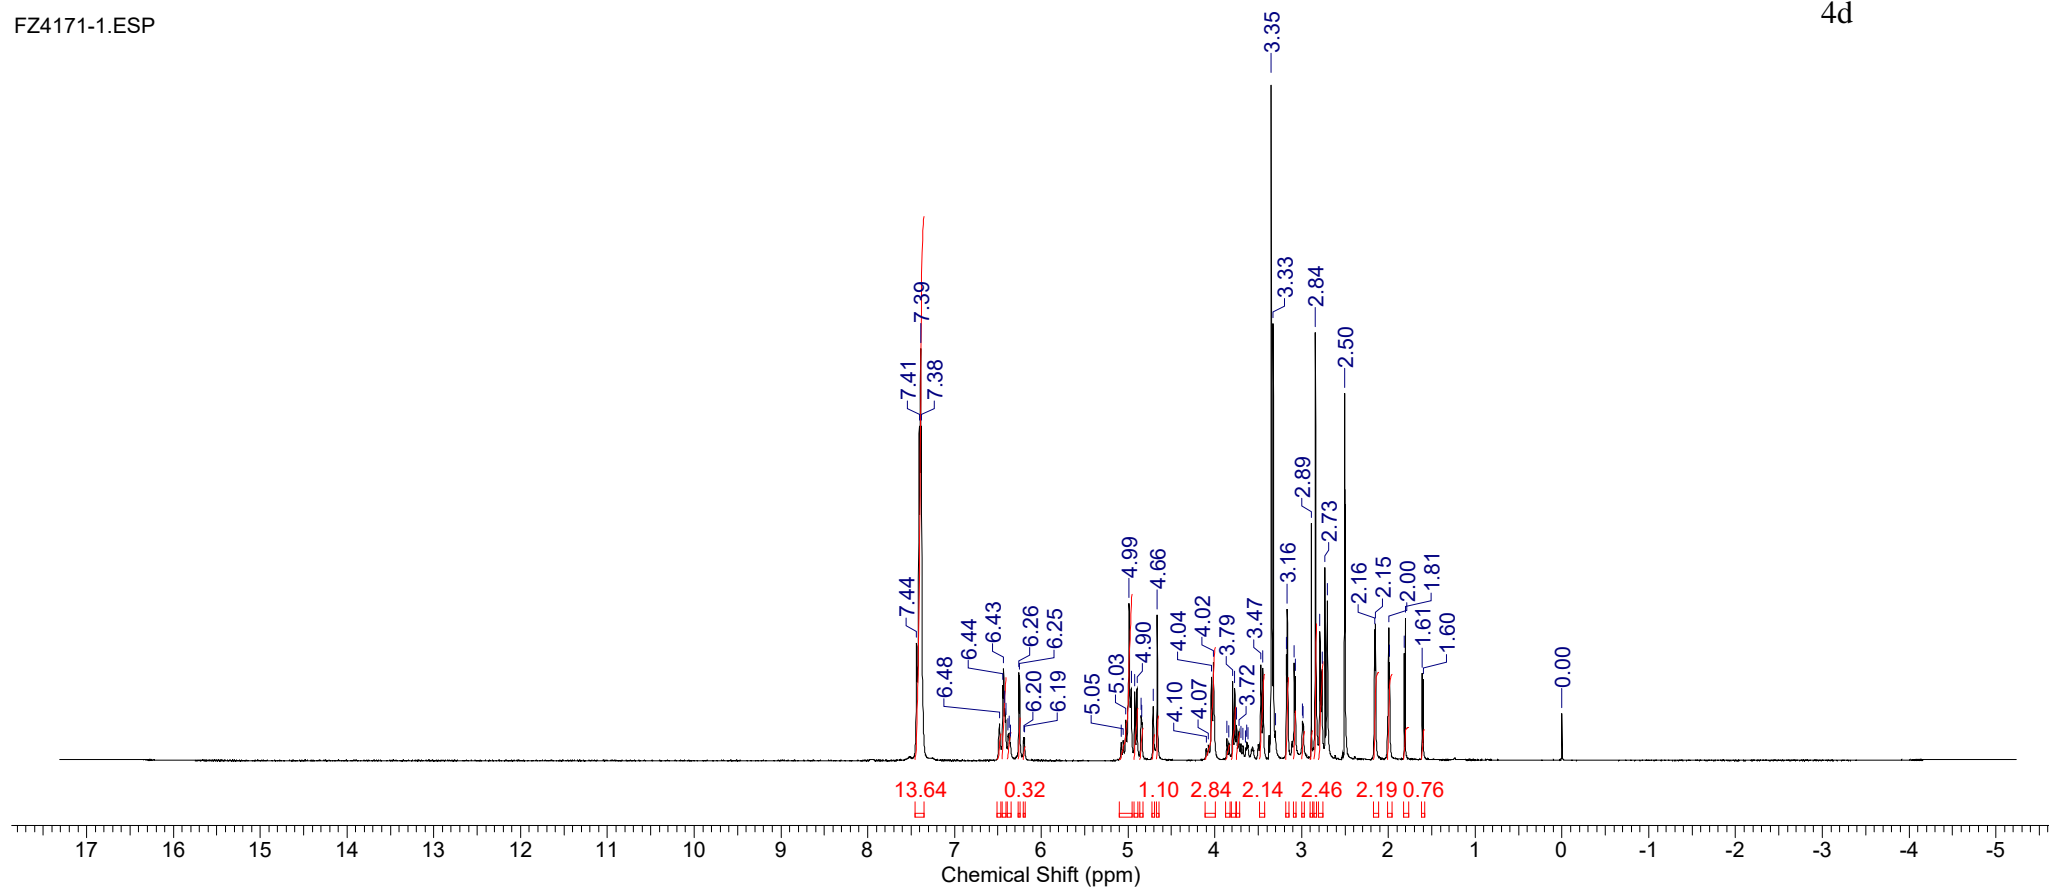

Formula  $C_{22}H_{20}N_2O_5$  FW 392.4046

|                        |                                         |                       |              |                      |                      |                      |                      |
|------------------------|-----------------------------------------|-----------------------|--------------|----------------------|----------------------|----------------------|----------------------|
| Acquisition Time (sec) | 1.2111                                  | Comment               | single_pulse | Date                 | 02 Apr 2015 12:21:25 | Date Stamp           | 02 Apr 2015 11:27:26 |
| File Name              | C:\USERS\Лабa534\DOWNLOADS\FZ4171-1.JDF | Frequency (MHz)       | 600.17       | Nucleus              | 1H                   | Number of Transients | 8                    |
| Origin                 | ECA 600                                 | Original Points Count | 16384        | Owner                | delta                | Points Count         | 16384                |
| Receiver Gain          | 38.00                                   | Solvent               | DMSO-d6      | Spectrum Offset (Hz) | 3623.7708            | Sweep Width (Hz)     | 13528.14             |

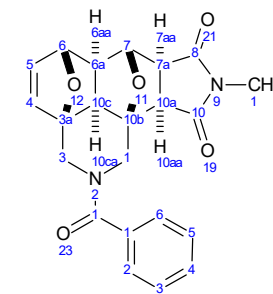

4d

FZ4171-1.ESP

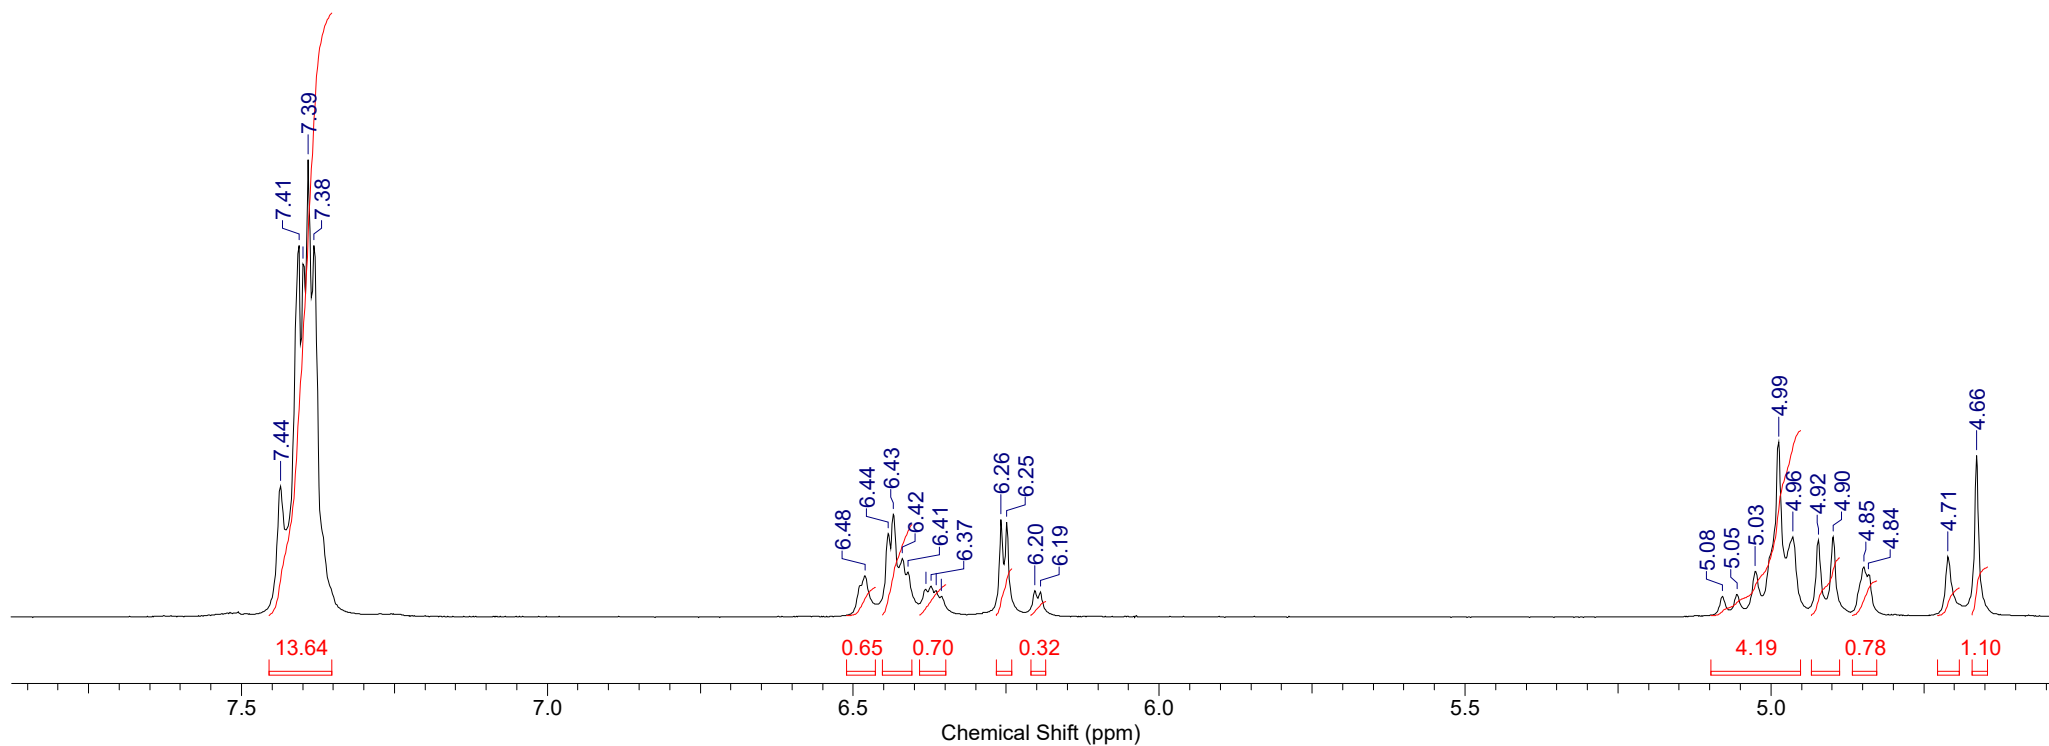

|                                                                              |                    |
|------------------------------------------------------------------------------|--------------------|
| <b>Formula</b> C <sub>22</sub> H <sub>20</sub> N <sub>2</sub> O <sub>5</sub> | <b>FW</b> 392.4046 |
|------------------------------------------------------------------------------|--------------------|

|                                                          |                                    |                                       |                                        |
|----------------------------------------------------------|------------------------------------|---------------------------------------|----------------------------------------|
| <b>Acquisition Time (sec)</b> 1.2111                     | <b>Comment</b> single_pulse        | <b>Date</b> 02 Apr 2015 12:21:25      | <b>Date Stamp</b> 02 Apr 2015 11:27:26 |
| <b>File Name</b> C:\USERS\Лабa534\DOWNLOADS\FZ4171-1.JDF | <b>Frequency (MHz)</b> 600.17      | <b>Nucleus</b> 1H                     | <b>Number of Transients</b> 8          |
| <b>Origin</b> ECA 600                                    | <b>Original Points Count</b> 16384 | <b>Owner</b> delta                    | <b>Points Count</b> 16384              |
| <b>Receiver Gain</b> 38.00                               | <b>Solvent</b> DMSO-d6             | <b>Spectrum Offset (Hz)</b> 3623.7708 | <b>Sweep Width (Hz)</b> 13528.14       |

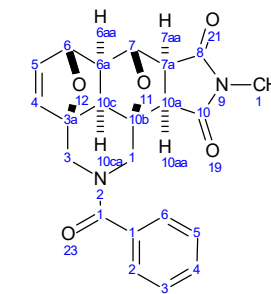

4d

FZ4171-1.ESP

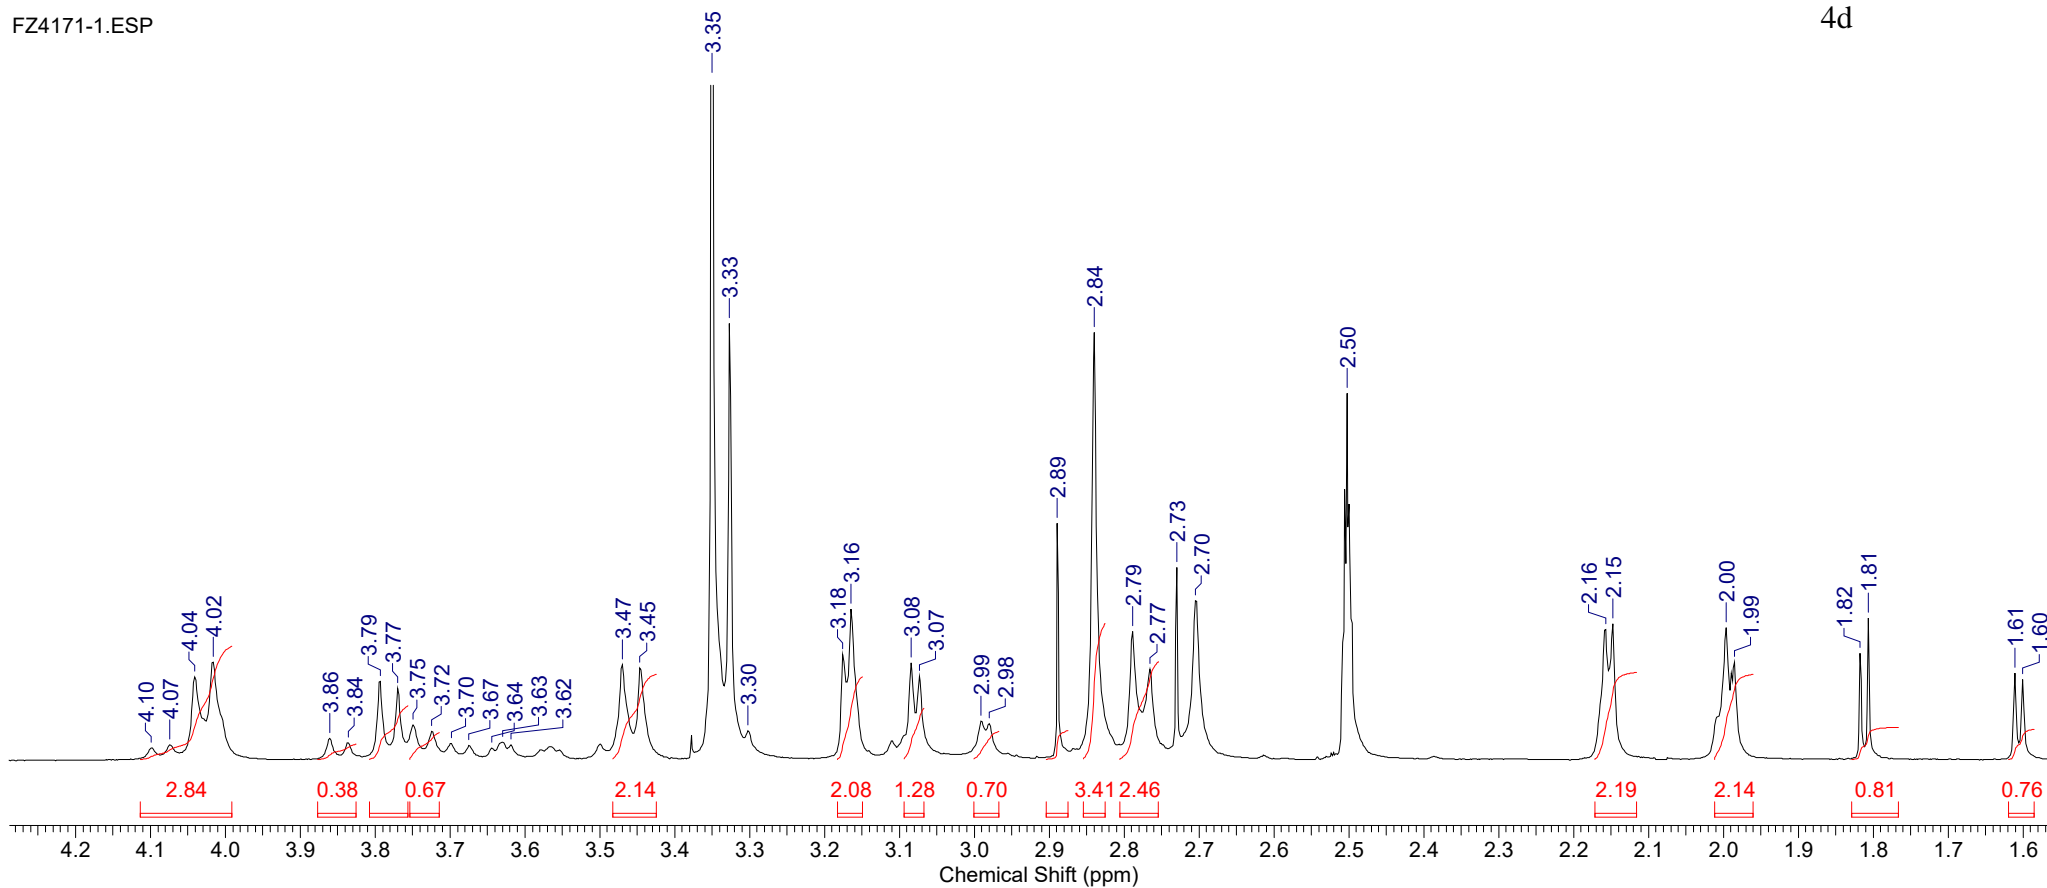

Formula  $C_{22}H_{20}N_2O_5$  FW 392.4046

|                        |                      |                        |                                                       |                      |                      |
|------------------------|----------------------|------------------------|-------------------------------------------------------|----------------------|----------------------|
| Acquisition Time (sec) | 0.5243               | Comment                | 5 mm QNP 1H/15N/13C/31P Z3379/0400                    | Date                 | 30 Apr 2015 14:00:32 |
| Date Stamp             | 30 Apr 2015 14:00:32 | File Name              | C:\USERS\Лабa534\DESKTOP\FZ-0415-KV-48-C13DEC_001001r |                      |                      |
| Frequency (MHz)        | 100.61               | Nucleus                | 13C                                                   | Number of Transients | 722                  |
| Original Points Count  | 16384                | Owner                  | root                                                  | Points Count         | 65536                |
| Receiver Gain          | 32768.00             | SW(cyclical) (Hz)      | 31250.00                                              | Solvent              | DMSO-d6              |
| Sweep Width (Hz)       | 31249.52             | Temperature (degree C) | 27.000                                                | Pulse Sequence       | zgpg                 |
|                        |                      |                        |                                                       | Spectrum Offset (Hz) | 9095.9688            |

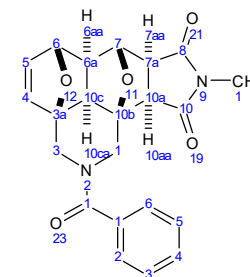

4d

FZ-0415-KV-48-C13DEC\_001001r

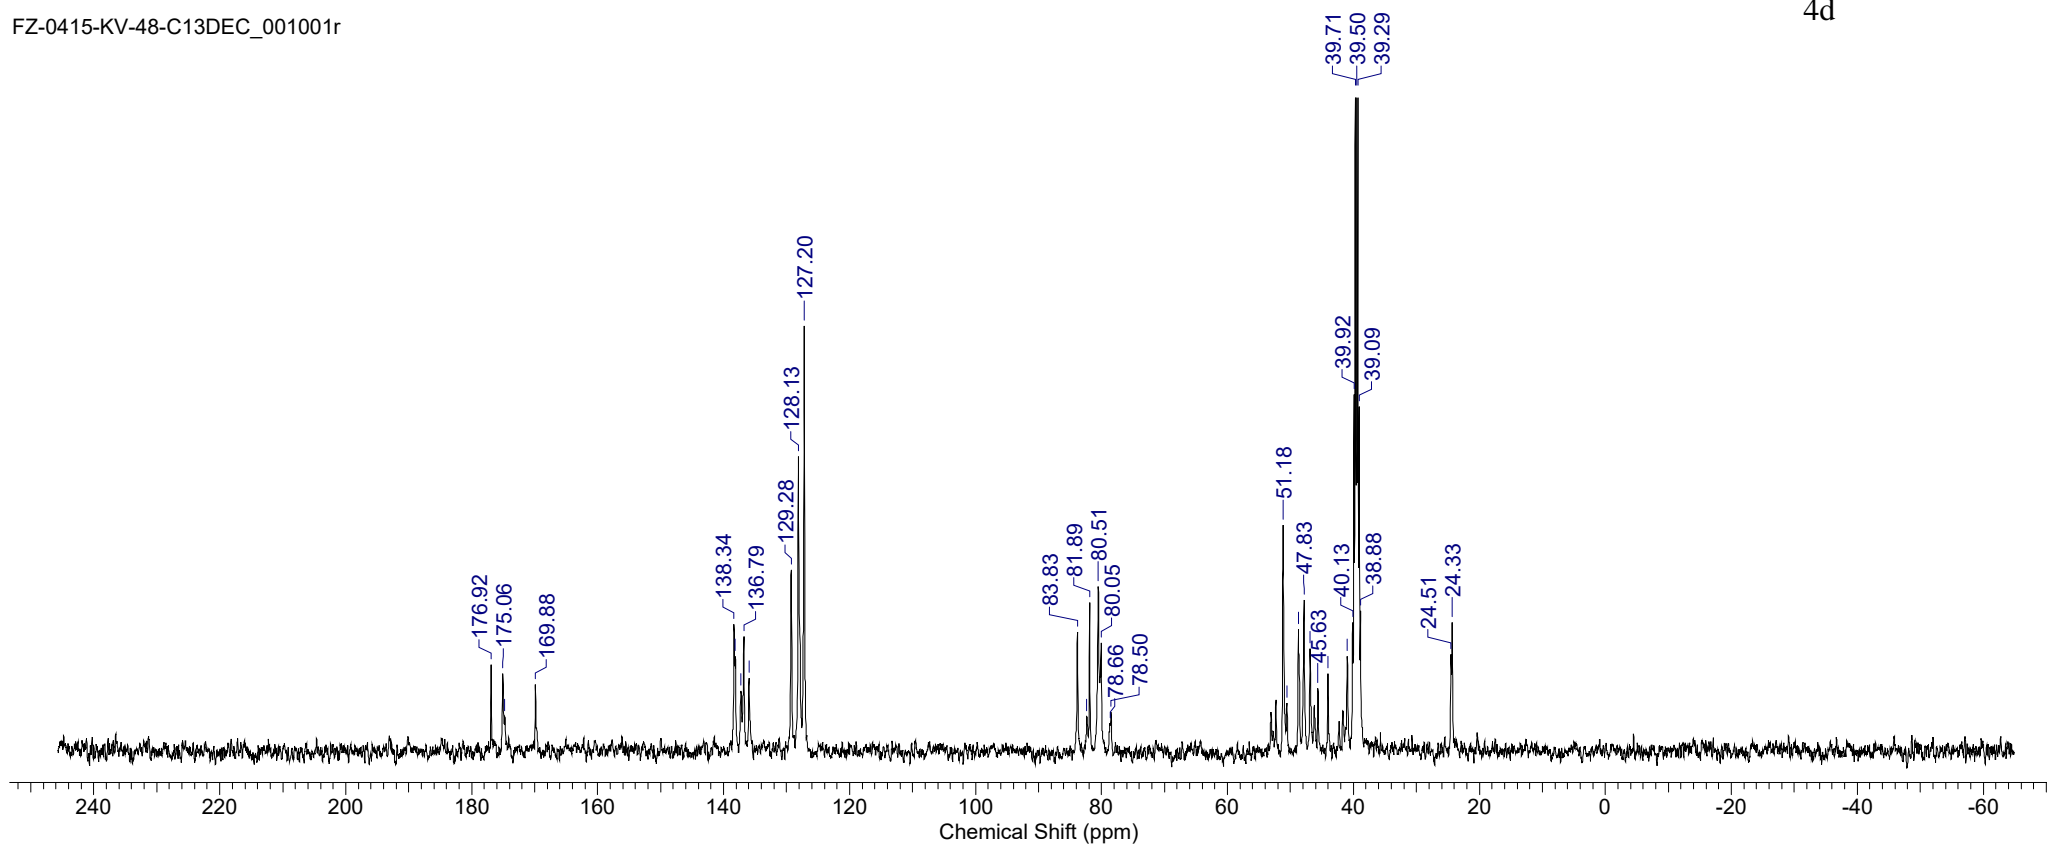

|                                                                              |                    |
|------------------------------------------------------------------------------|--------------------|
| <b>Formula</b> C <sub>22</sub> H <sub>20</sub> N <sub>2</sub> O <sub>5</sub> | <b>FW</b> 392.4046 |
|------------------------------------------------------------------------------|--------------------|

|                               |                      |                               |                                                       |                             |                      |
|-------------------------------|----------------------|-------------------------------|-------------------------------------------------------|-----------------------------|----------------------|
| <b>Acquisition Time (sec)</b> | 0.5243               | <b>Comment</b>                | 5 mm QNP 1H/15N/13C/31P Z3379/0400                    | <b>Date</b>                 | 30 Apr 2015 14:00:32 |
| <b>Date Stamp</b>             | 30 Apr 2015 14:00:32 | <b>File Name</b>              | C:\USERS\Лабa534\DESKTOP\FZ-0415-KV-48-C13DEC_001001r |                             |                      |
| <b>Frequency (MHz)</b>        | 100.61               | <b>Nucleus</b>                | 13C                                                   | <b>Number of Transients</b> | 722                  |
| <b>Original Points Count</b>  | 16384                | <b>Owner</b>                  | root                                                  | <b>Origin</b>               | spect                |
| <b>Receiver Gain</b>          | 32768.00             | <b>SW(cyclical) (Hz)</b>      | 31250.00                                              | <b>Points Count</b>         | 65536                |
| <b>Sweep Width (Hz)</b>       | 31249.52             | <b>Solvent</b>                | DMSO-d6                                               | <b>Pulse Sequence</b>       | zgpg                 |
|                               |                      | <b>Temperature (degree C)</b> | 27.000                                                | <b>Spectrum Offset (Hz)</b> | 9095.9688            |



4d

FZ-0415-KV-48-C13DEC\_001001r

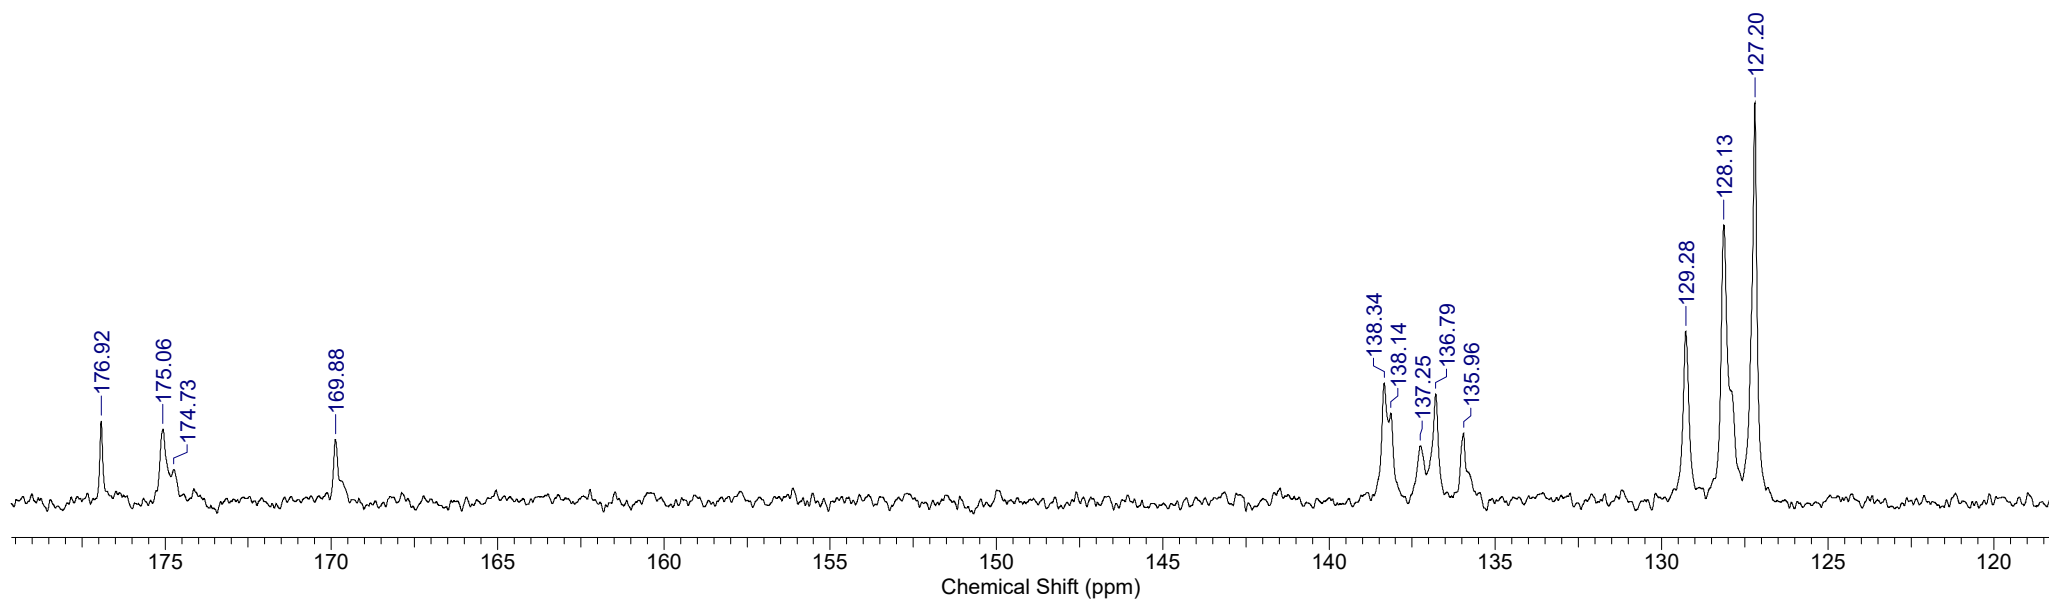

|                                                                              |                    |
|------------------------------------------------------------------------------|--------------------|
| <b>Formula</b> C <sub>22</sub> H <sub>20</sub> N <sub>2</sub> O <sub>5</sub> | <b>FW</b> 392.4046 |
|------------------------------------------------------------------------------|--------------------|

|                                        |                                                                        |                                       |
|----------------------------------------|------------------------------------------------------------------------|---------------------------------------|
| <b>Acquisition Time (sec)</b> 0.5243   | <b>Comment</b> 5 mm QNP 1H/15N/13C/31P Z3379/0400                      | <b>Date</b> 30 Apr 2015 14:00:32      |
| <b>Date Stamp</b> 30 Apr 2015 14:00:32 | <b>File Name</b> C:\USERS\Лабa534\DESKTOP\FZ-0415-KV-48-C13DEC_001001r |                                       |
| <b>Frequency (MHz)</b> 100.61          | <b>Nucleus</b> 13C                                                     | <b>Number of Transients</b> 722       |
| <b>Original Points Count</b> 16384     | <b>Owner</b> root                                                      | <b>Origin</b> spect                   |
| <b>Receiver Gain</b> 32768.00          | <b>SW(cyclical) (Hz)</b> 31250.00                                      | <b>Points Count</b> 65536             |
| <b>Sweep Width (Hz)</b> 31249.52       | <b>Temperature (degree C)</b> 27.000                                   | <b>Pulse Sequence</b> zgpg            |
|                                        | <b>Solvent</b> DMSO-d6                                                 | <b>Spectrum Offset (Hz)</b> 9095.9688 |



4d

FZ-0415-KV-48-C13DEC\_001001r

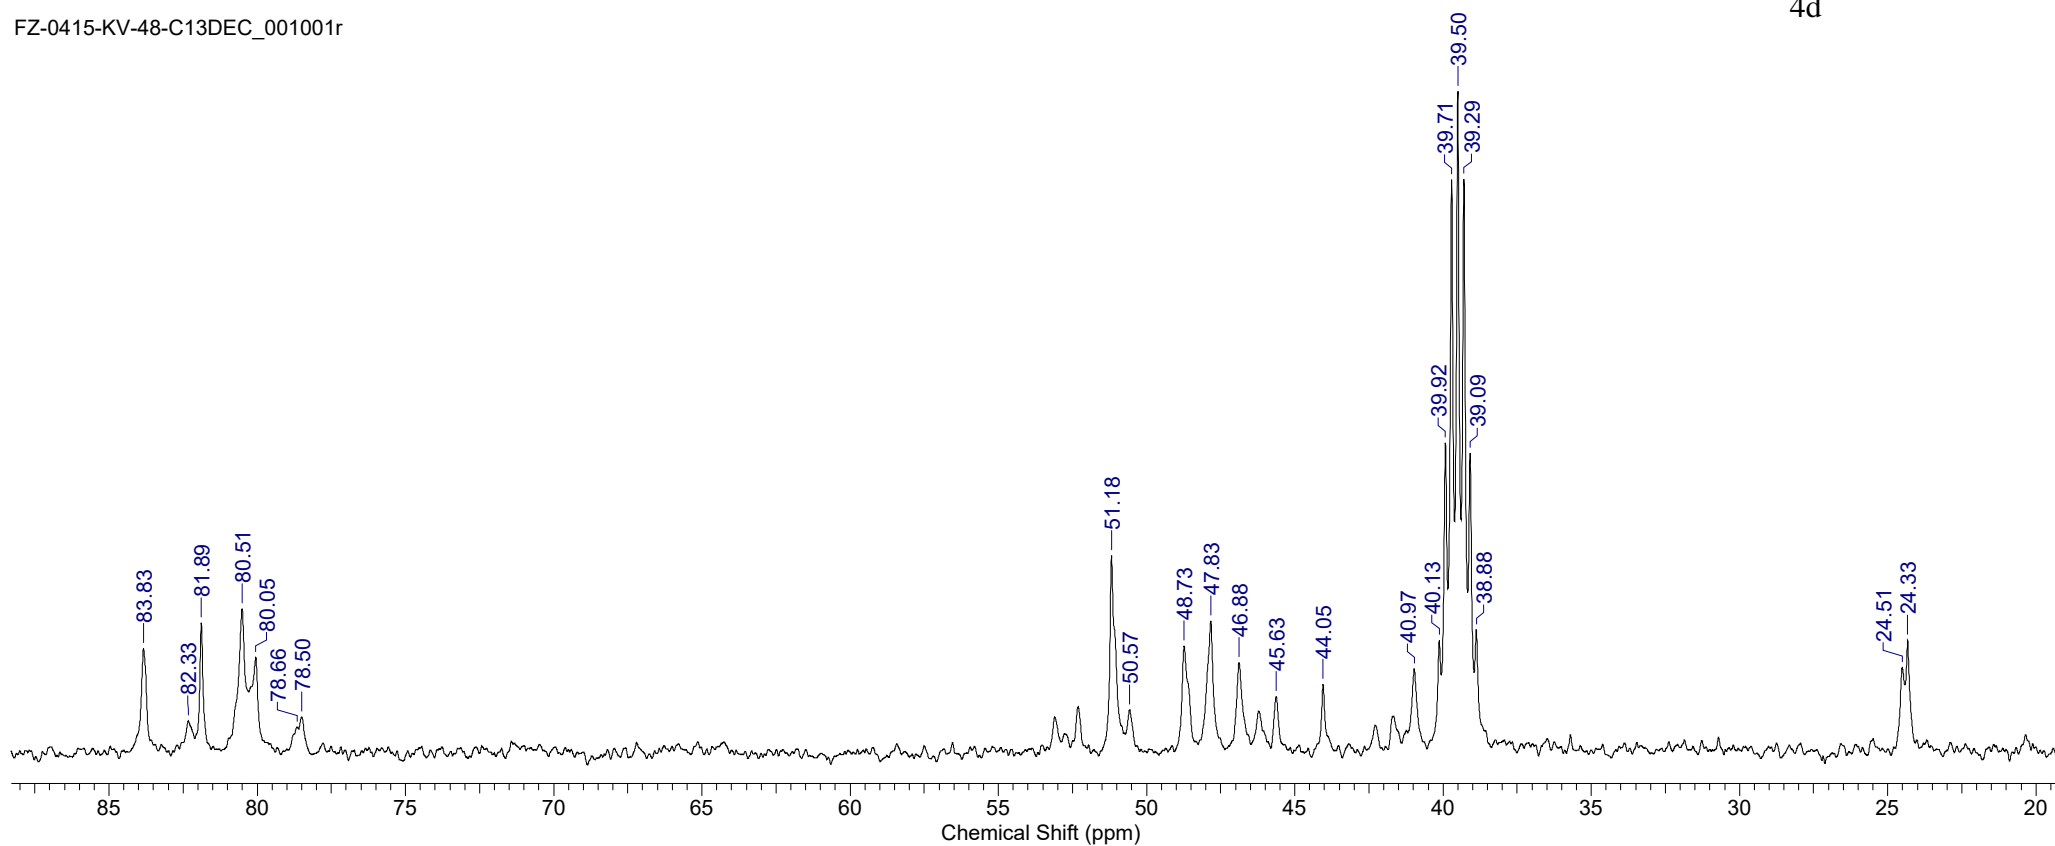

|                                                                                             |                    |
|---------------------------------------------------------------------------------------------|--------------------|
| <b>Formula</b> C <sub>17</sub> H <sub>15</sub> F <sub>3</sub> N <sub>2</sub> O <sub>5</sub> | <b>FW</b> 384.3066 |
|---------------------------------------------------------------------------------------------|--------------------|

|                                                           |                                    |                                       |                                        |
|-----------------------------------------------------------|------------------------------------|---------------------------------------|----------------------------------------|
| <b>Acquisition Time (sec)</b> 2.4222                      | <b>Comment</b> single_pulse        | <b>Date</b> 10 Apr 2015 12:28:39      | <b>Date Stamp</b> 10 Apr 2015 11:34:47 |
| <b>File Name</b> C:\USERS\Лаб6а534\DOWNLOADS\FZ4195-1.JDF | <b>Frequency (MHz)</b> 600.17      | <b>Nucleus</b> 1H                     | <b>Number of Transients</b> 8          |
| <b>Origin</b> ECA 600                                     | <b>Original Points Count</b> 32768 | <b>Owner</b> delta                    | <b>Pulse Sequence</b> single_pulse.ex2 |
| <b>Receiver Gain</b> 40.00                                | <b>Solvent</b> CHLOROFORM-d        | <b>Spectrum Offset (Hz)</b> 3613.9580 | <b>Sweep Width (Hz)</b> 13528.14       |

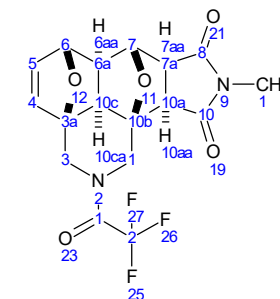

4c

FZ4195-1 COCF3 C ME.ESP

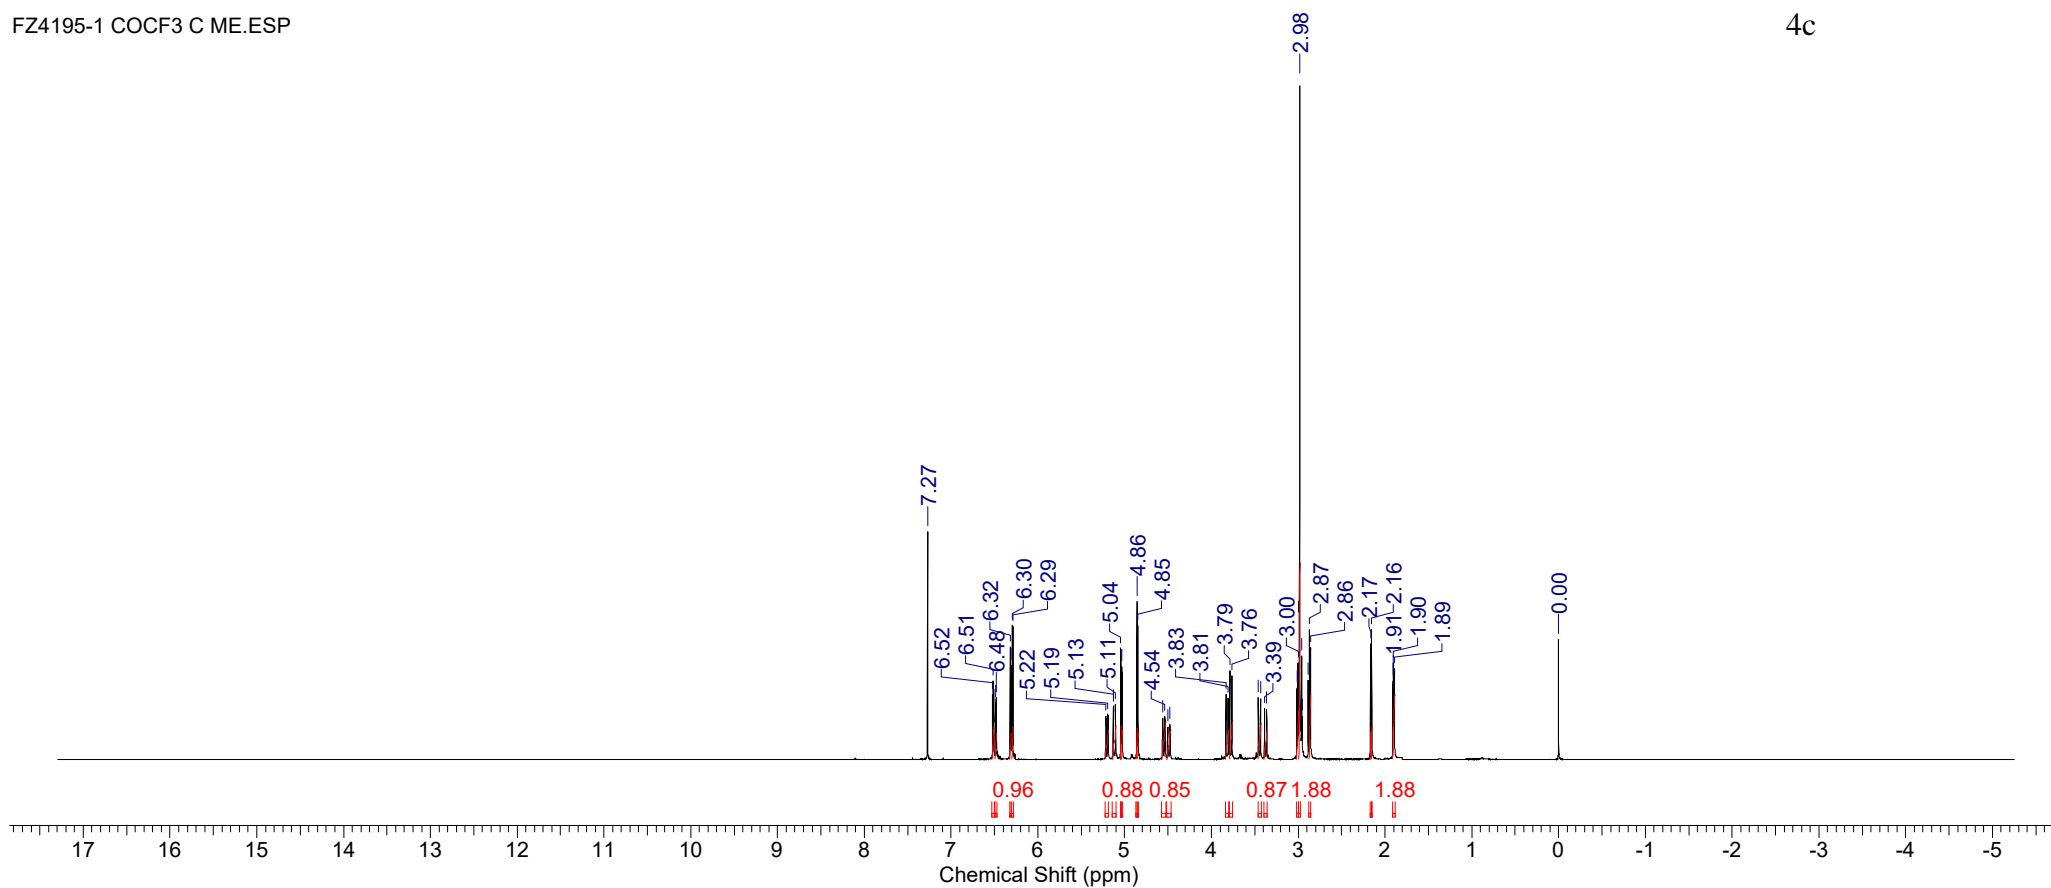



|                                                                                             |                    |
|---------------------------------------------------------------------------------------------|--------------------|
| <b>Formula</b> C <sub>17</sub> H <sub>15</sub> F <sub>3</sub> N <sub>3</sub> O <sub>5</sub> | <b>FW</b> 384.3066 |
|---------------------------------------------------------------------------------------------|--------------------|

|                                                          |                                    |                                       |                                        |
|----------------------------------------------------------|------------------------------------|---------------------------------------|----------------------------------------|
| <b>Acquisition Time (sec)</b> 2.4222                     | <b>Comment</b> single_pulse        | <b>Date</b> 10 Apr 2015 12:28:39      | <b>Date Stamp</b> 10 Apr 2015 11:34:47 |
| <b>File Name</b> C:\USERS\Лабa534\DOWNLOADS\FZ4195-1.JDF | <b>Frequency (MHz)</b> 600.17      | <b>Nucleus</b> 1H                     | <b>Number of Transients</b> 8          |
| <b>Origin</b> ECA 600                                    | <b>Original Points Count</b> 32768 | <b>Owner</b> delta                    | <b>Pulse Sequence</b> single_pulse.ex2 |
| <b>Receiver Gain</b> 40.00                               | <b>Solvent</b> CHLOROFORM-d        | <b>Spectrum Offset (Hz)</b> 3613.9580 | <b>Sweep Width (Hz)</b> 13528.14       |

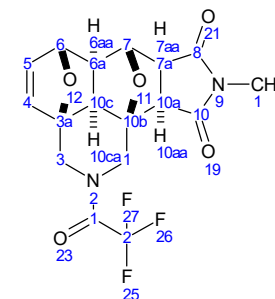

4c

FZ4195-1 COCF3 C ME.ESP

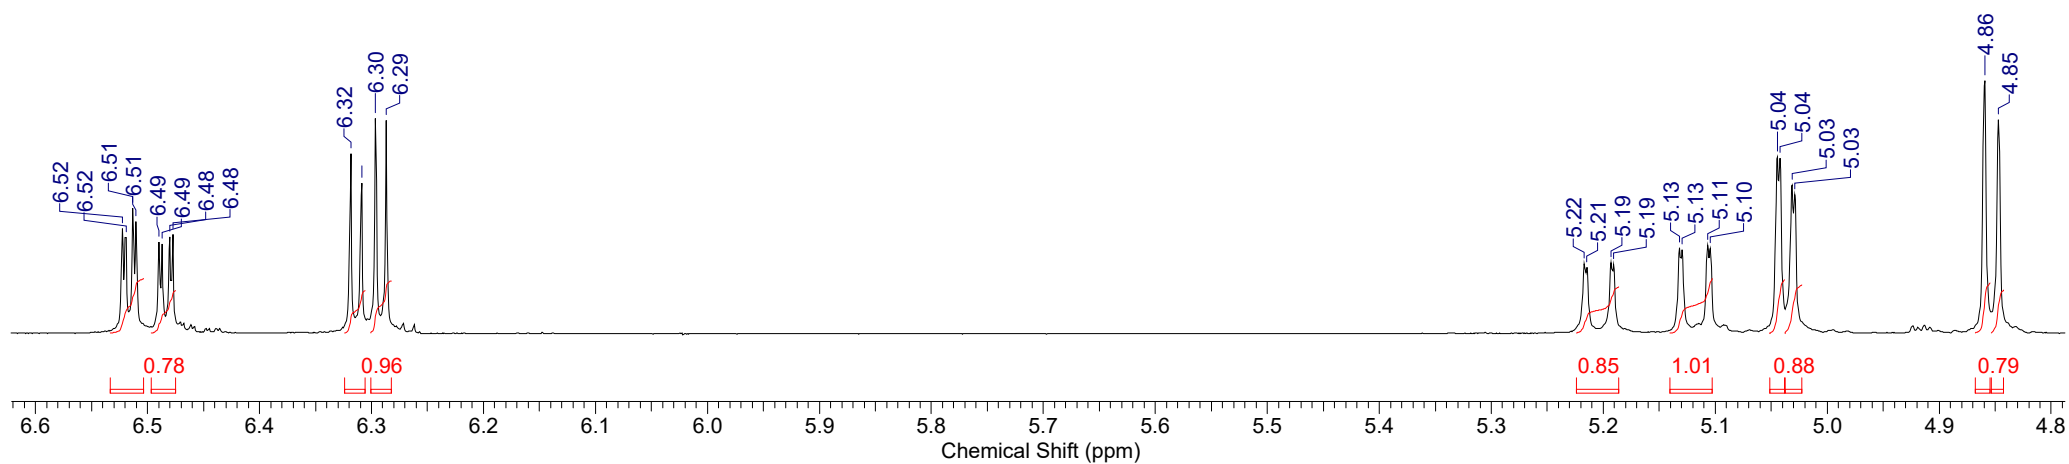

|                                                                                             |                    |
|---------------------------------------------------------------------------------------------|--------------------|
| <b>Formula</b> C <sub>17</sub> H <sub>15</sub> F <sub>3</sub> N <sub>2</sub> O <sub>5</sub> | <b>FW</b> 384.3066 |
|---------------------------------------------------------------------------------------------|--------------------|

|                                                          |                                    |                                       |                                        |
|----------------------------------------------------------|------------------------------------|---------------------------------------|----------------------------------------|
| <b>Acquisition Time (sec)</b> 2.4222                     | <b>Comment</b> single_pulse        | <b>Date</b> 10 Apr 2015 12:28:39      | <b>Date Stamp</b> 10 Apr 2015 11:34:47 |
| <b>File Name</b> C:\USERS\Лабa534\DOWNLOADS\FZ4195-1.JDF | <b>Frequency (MHz)</b> 600.17      | <b>Nucleus</b> 1H                     | <b>Number of Transients</b> 8          |
| <b>Origin</b> ECA 600                                    | <b>Original Points Count</b> 32768 | <b>Owner</b> delta                    | <b>Pulse Sequence</b> single_pulse.ex2 |
| <b>Receiver Gain</b> 40.00                               | <b>Solvent</b> CHLOROFORM-d        | <b>Spectrum Offset (Hz)</b> 3613.9580 | <b>Sweep Width (Hz)</b> 13528.14       |



4c

FZ4195-1 COCF3 C ME.ESP

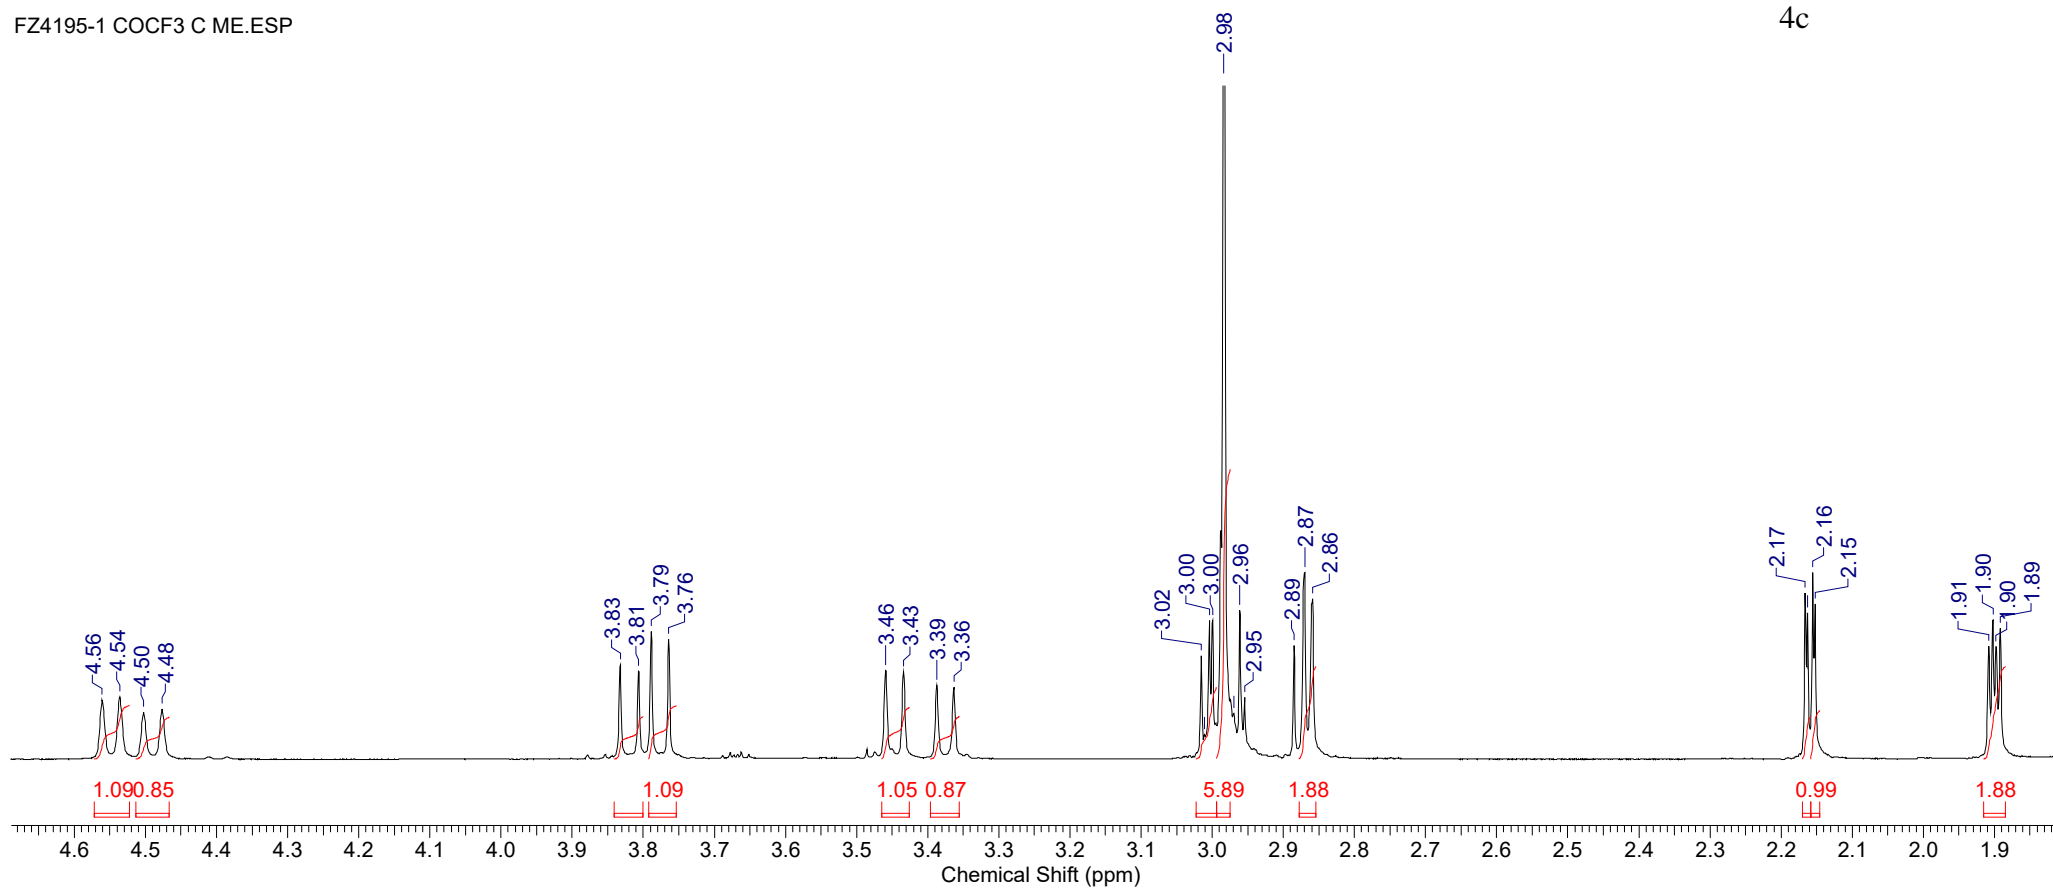

|                                                                                             |                    |
|---------------------------------------------------------------------------------------------|--------------------|
| <b>Formula</b> C <sub>17</sub> H <sub>15</sub> F <sub>3</sub> N <sub>2</sub> O <sub>5</sub> | <b>FW</b> 384.3066 |
|---------------------------------------------------------------------------------------------|--------------------|

|                                        |                                                          |                                        |
|----------------------------------------|----------------------------------------------------------|----------------------------------------|
| <b>Acquisition Time (sec)</b> 0.6921   | <b>Comment</b> single pulse decoupled gated NOE          | <b>Date</b> 20 Aug 2020 08:59:36       |
| <b>Date Stamp</b> 20 Aug 2020 09:00:43 | <b>File Name</b> C:\USERS\la6a534\DOWNLOADS\FZ8999-1.JDF |                                        |
| <b>Frequency (MHz)</b> 150.91          | <b>Nucleus</b> 13C                                       | <b>Number of Transients</b> 1096       |
| <b>Original Points Count</b> 32768     | <b>Owner</b> CKP                                         | <b>Points Count</b> 32768              |
| <b>Receiver Gain</b> 56.00             | <b>Solvent</b> CHLOROFORM-d                              | <b>Pulse Sequence</b> single pulse dec |
| <b>Sweep Width (Hz)</b> 47348.49       |                                                          | <b>Spectrum Offset (Hz)</b> 15080.7979 |

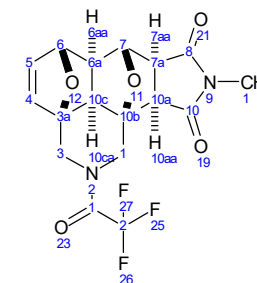

4c

FZ8999-1 4C-13C.ESP

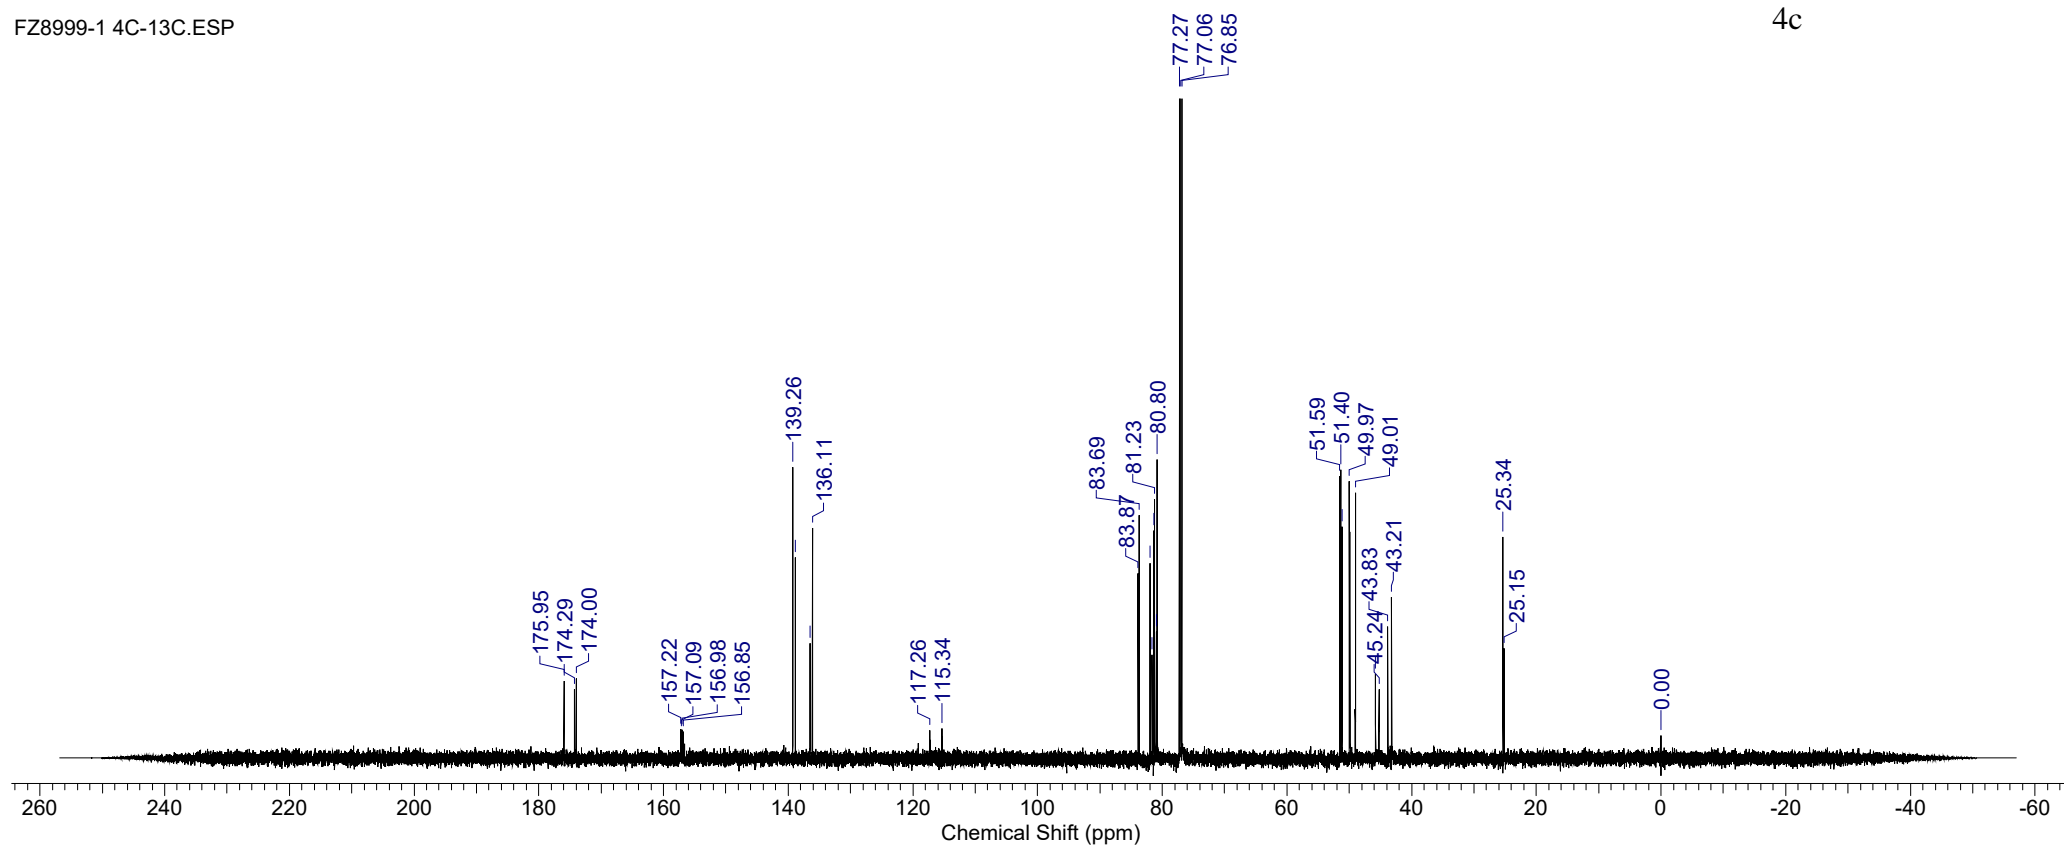

|                                                                                             |                    |
|---------------------------------------------------------------------------------------------|--------------------|
| <b>Formula</b> C <sub>17</sub> H <sub>15</sub> F <sub>3</sub> N <sub>2</sub> O <sub>5</sub> | <b>FW</b> 384.3066 |
|---------------------------------------------------------------------------------------------|--------------------|

|                                        |                                                           |                                        |
|----------------------------------------|-----------------------------------------------------------|----------------------------------------|
| <b>Acquisition Time (sec)</b> 0.6921   | <b>Comment</b> single pulse decoupled gated NOE           | <b>Date</b> 20 Aug 2020 08:59:36       |
| <b>Date Stamp</b> 20 Aug 2020 09:00:43 | <b>File Name</b> C:\USERS\l1a6a534\DOWNLOADS\FZ8999-1.JDF |                                        |
| <b>Frequency (MHz)</b> 150.91          | <b>Nucleus</b> 13C                                        | <b>Number of Transients</b> 1096       |
| <b>Original Points Count</b> 32768     | <b>Owner</b> CKP                                          | <b>Points Count</b> 32768              |
| <b>Receiver Gain</b> 56.00             | <b>Solvent</b> CHLOROFORM-d                               | <b>Pulse Sequence</b> single pulse dec |
| <b>Sweep Width (Hz)</b> 47348.49       |                                                           | <b>Spectrum Offset (Hz)</b> 15080.7979 |



4c

FZ8999-1 4C-13C.ESP

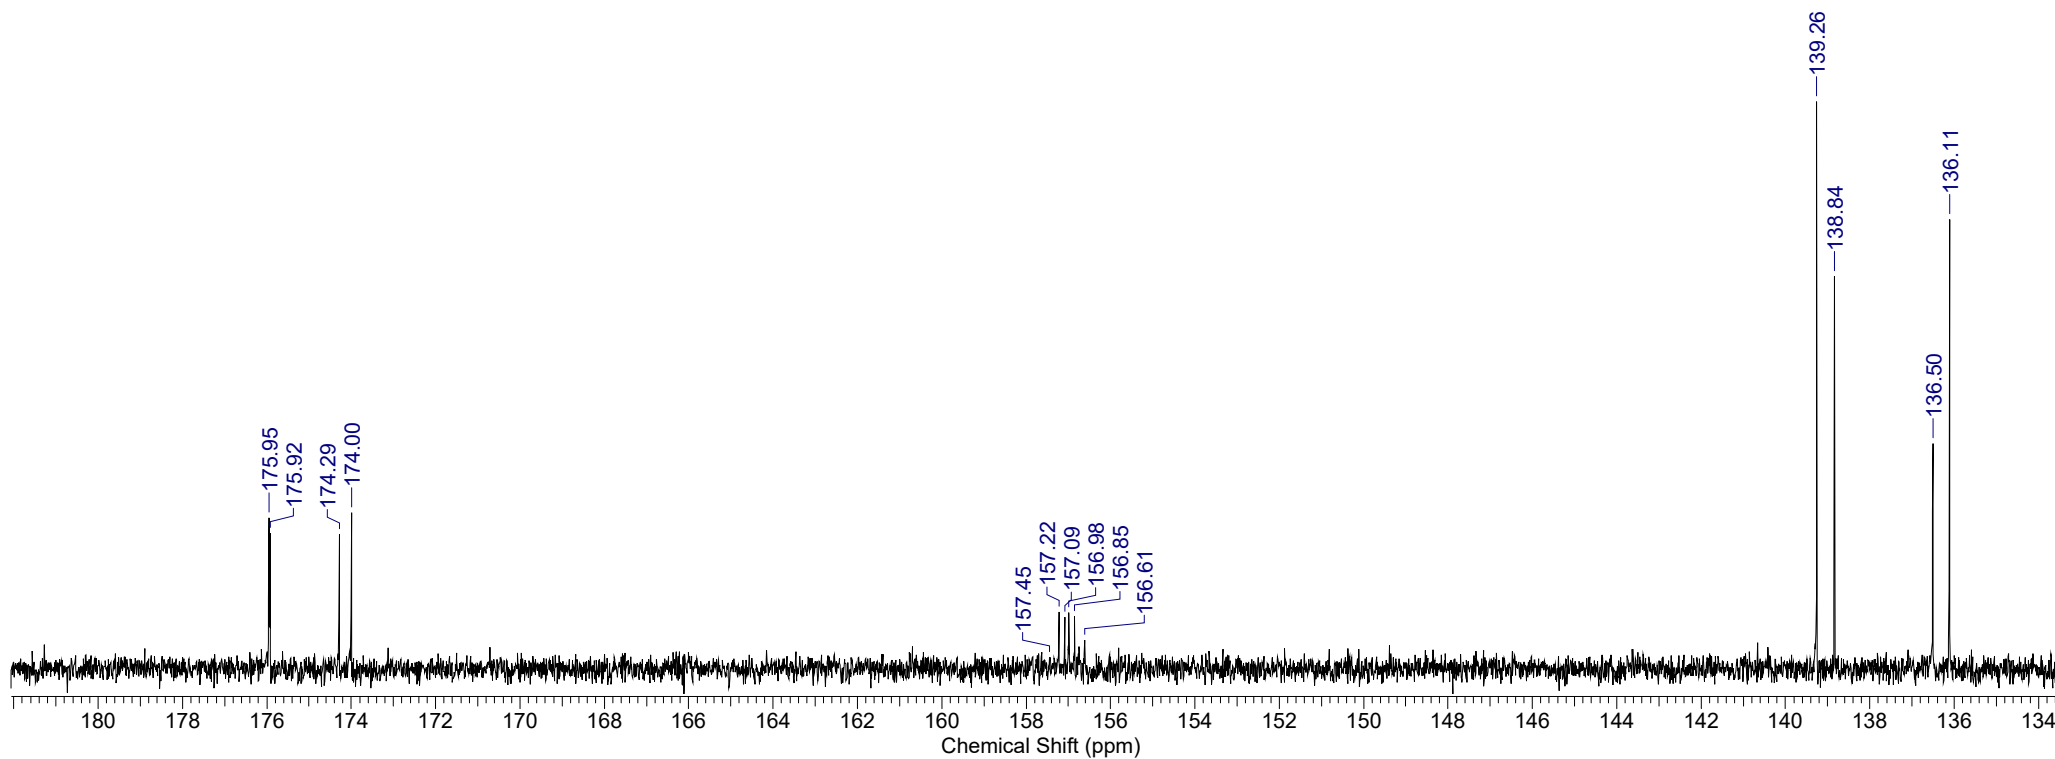

|                                                                                             |                    |
|---------------------------------------------------------------------------------------------|--------------------|
| <b>Formula</b> C <sub>17</sub> H <sub>15</sub> F <sub>3</sub> N <sub>2</sub> O <sub>5</sub> | <b>FW</b> 384.3066 |
|---------------------------------------------------------------------------------------------|--------------------|

|                                        |                                                           |                                        |
|----------------------------------------|-----------------------------------------------------------|----------------------------------------|
| <b>Acquisition Time (sec)</b> 0.6921   | <b>Comment</b> single pulse decoupled gated NOE           | <b>Date</b> 20 Aug 2020 08:59:36       |
| <b>Date Stamp</b> 20 Aug 2020 09:00:43 | <b>File Name</b> C:\USERS\l1a6a534\DOWNLOADS\FZ8999-1.JDF |                                        |
| <b>Frequency (MHz)</b> 150.91          | <b>Nucleus</b> 13C                                        | <b>Number of Transients</b> 1096       |
| <b>Original Points Count</b> 32768     | <b>Owner</b> CKP                                          | <b>Points Count</b> 32768              |
| <b>Receiver Gain</b> 56.00             | <b>Solvent</b> CHLOROFORM-d                               | <b>Pulse Sequence</b> single pulse dec |
| <b>Sweep Width (Hz)</b> 47348.49       |                                                           | <b>Spectrum Offset (Hz)</b> 15080.7979 |



4c

FZ8999-1 4C-13C.ESP

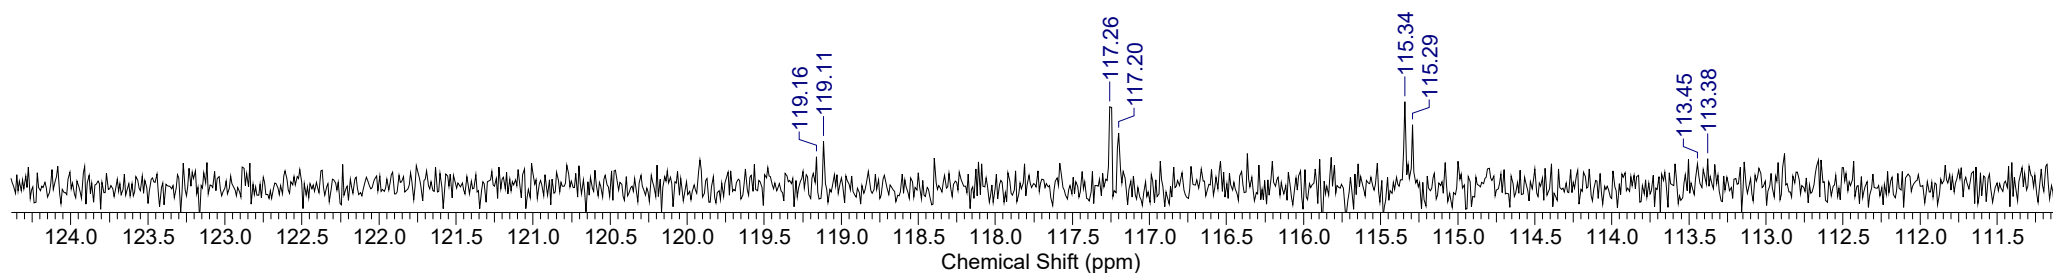

|                                                                                             |                    |
|---------------------------------------------------------------------------------------------|--------------------|
| <b>Formula</b> C <sub>17</sub> H <sub>15</sub> F <sub>3</sub> N <sub>2</sub> O <sub>5</sub> | <b>FW</b> 384.3066 |
|---------------------------------------------------------------------------------------------|--------------------|

|                                        |                                                          |                                        |
|----------------------------------------|----------------------------------------------------------|----------------------------------------|
| <b>Acquisition Time (sec)</b> 0.6921   | <b>Comment</b> single pulse decoupled gated NOE          | <b>Date</b> 20 Aug 2020 08:59:36       |
| <b>Date Stamp</b> 20 Aug 2020 09:00:43 | <b>File Name</b> C:\USERS\la6a534\DOWNLOADS\FZ8999-1.JDF |                                        |
| <b>Frequency (MHz)</b> 150.91          | <b>Nucleus</b> 13C                                       | <b>Number of Transients</b> 1096       |
| <b>Original Points Count</b> 32768     | <b>Owner</b> CKP                                         | <b>Points Count</b> 32768              |
| <b>Receiver Gain</b> 56.00             | <b>Solvent</b> CHLOROFORM-d                              | <b>Pulse Sequence</b> single pulse dec |
| <b>Sweep Width (Hz)</b> 47348.49       |                                                          | <b>Spectrum Offset (Hz)</b> 15080.7979 |



4c

FZ8999-1 4C-13C.ESP

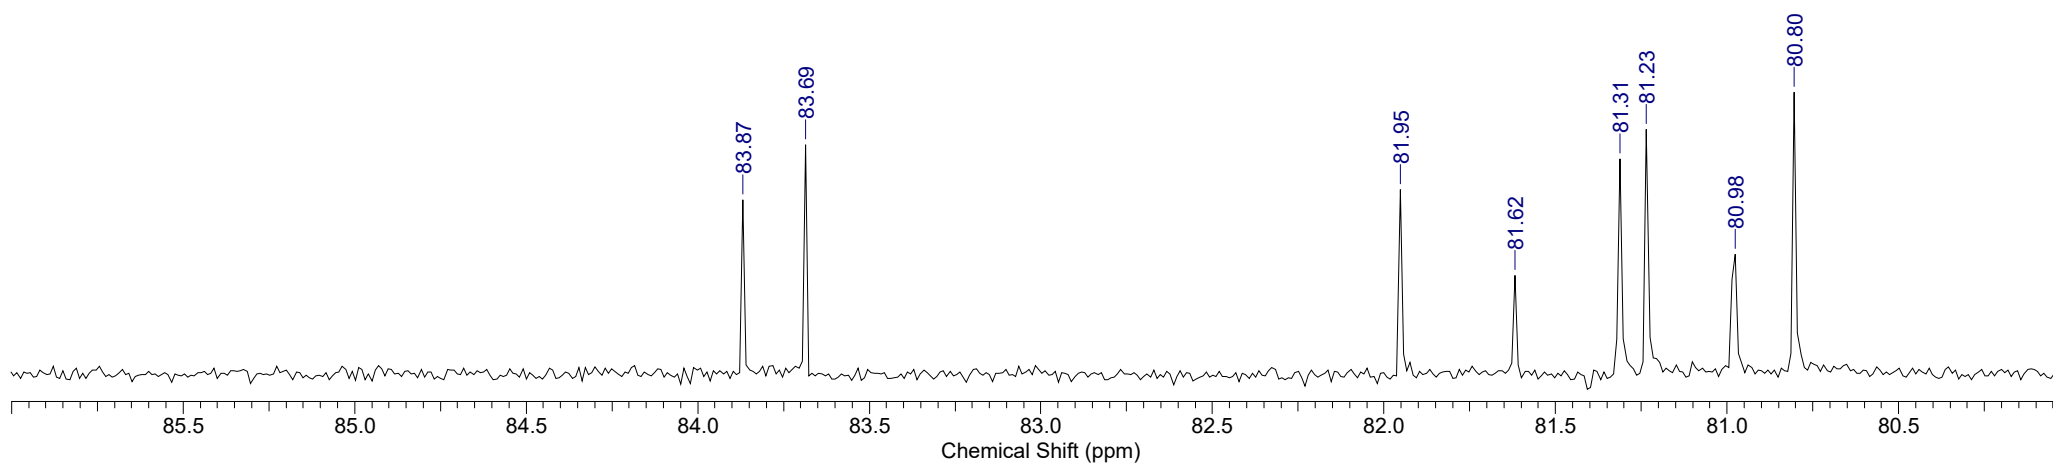

|                                                                                             |                    |
|---------------------------------------------------------------------------------------------|--------------------|
| <b>Formula</b> C <sub>17</sub> H <sub>15</sub> F <sub>3</sub> N <sub>2</sub> O <sub>5</sub> | <b>FW</b> 384.3066 |
|---------------------------------------------------------------------------------------------|--------------------|

|                                        |                                                          |                                        |
|----------------------------------------|----------------------------------------------------------|----------------------------------------|
| <b>Acquisition Time (sec)</b> 0.6921   | <b>Comment</b> single pulse decoupled gated NOE          | <b>Date</b> 20 Aug 2020 08:59:36       |
| <b>Date Stamp</b> 20 Aug 2020 09:00:43 | <b>File Name</b> C:\USERS\la6a534\DOWNLOADS\FZ8999-1.JDF |                                        |
| <b>Frequency (MHz)</b> 150.91          | <b>Nucleus</b> 13C                                       | <b>Number of Transients</b> 1096       |
| <b>Original Points Count</b> 32768     | <b>Owner</b> CKP                                         | <b>Points Count</b> 32768              |
| <b>Receiver Gain</b> 56.00             | <b>Solvent</b> CHLOROFORM-d                              | <b>Pulse Sequence</b> single pulse dec |
| <b>Sweep Width (Hz)</b> 47348.49       |                                                          | <b>Spectrum Offset (Hz)</b> 15080.7979 |



4c

FZ8999-1 4C-13C.ESP

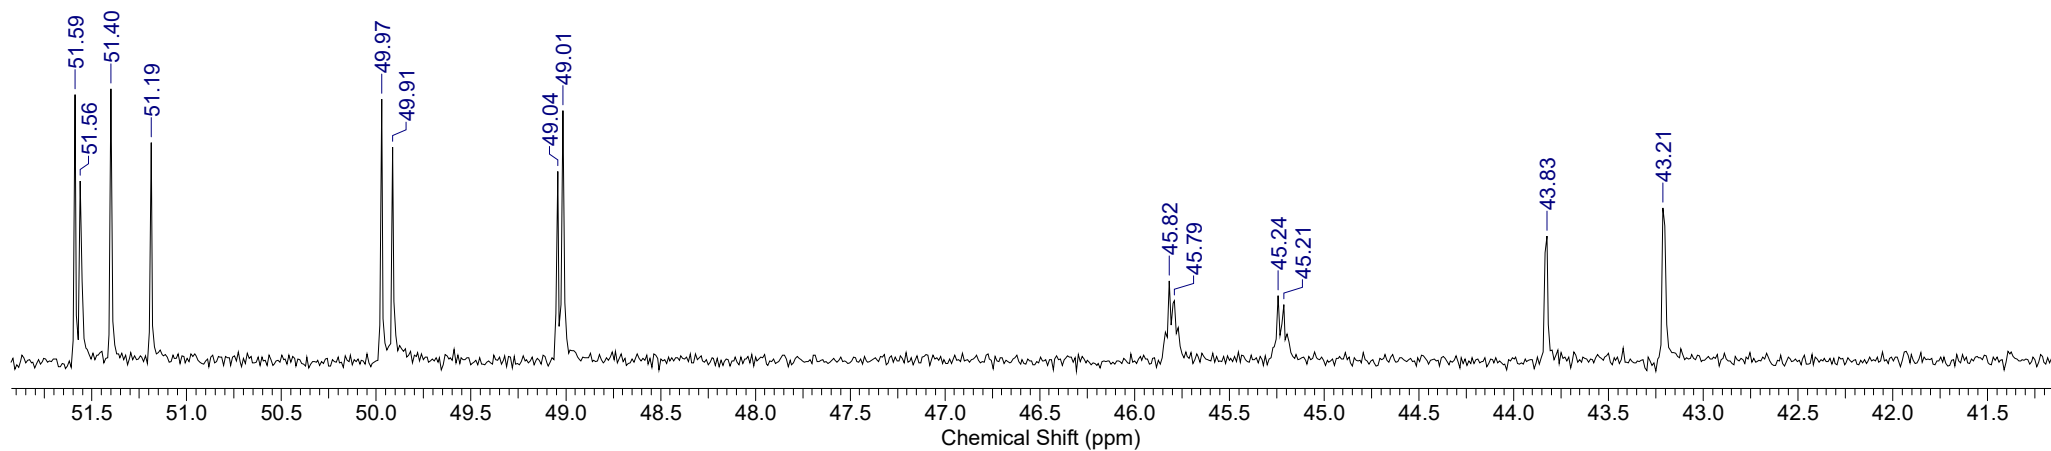

|                                                                                             |                    |
|---------------------------------------------------------------------------------------------|--------------------|
| <b>Formula</b> C <sub>17</sub> H <sub>15</sub> F <sub>3</sub> N <sub>2</sub> O <sub>5</sub> | <b>FW</b> 384.3066 |
|---------------------------------------------------------------------------------------------|--------------------|

|                                                          |                                    |                                         |                                        |
|----------------------------------------------------------|------------------------------------|-----------------------------------------|----------------------------------------|
| <b>Acquisition Time (sec)</b> 0.4614                     | <b>Comment</b> single_pulse        | <b>Date</b> 20 Aug 2020 09:01:25        | <b>Date Stamp</b> 20 Aug 2020 09:02:31 |
| <b>File Name</b> C:\USERS\Лабa534\DOWNLOADS\FZ8999-2.JDF | <b>Frequency (MHz)</b> 564.73      | <b>Nucleus</b> 19F                      | <b>Number of Transients</b> 16         |
| <b>Origin</b> ECA 600                                    | <b>Original Points Count</b> 65536 | <b>Owner</b> CKP                        | <b>Pulse Sequence</b> single_pulse.ex2 |
| <b>Receiver Gain</b> 40.00                               | <b>Solvent</b> CHLOROFORM-d        | <b>Spectrum Offset (Hz)</b> -56472.6094 | <b>Sweep Width (Hz)</b> 142045.45      |

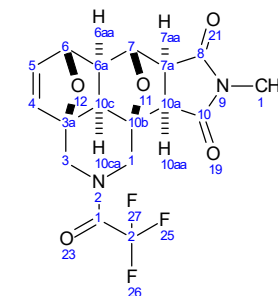

4c

FZ8999-2.JDF

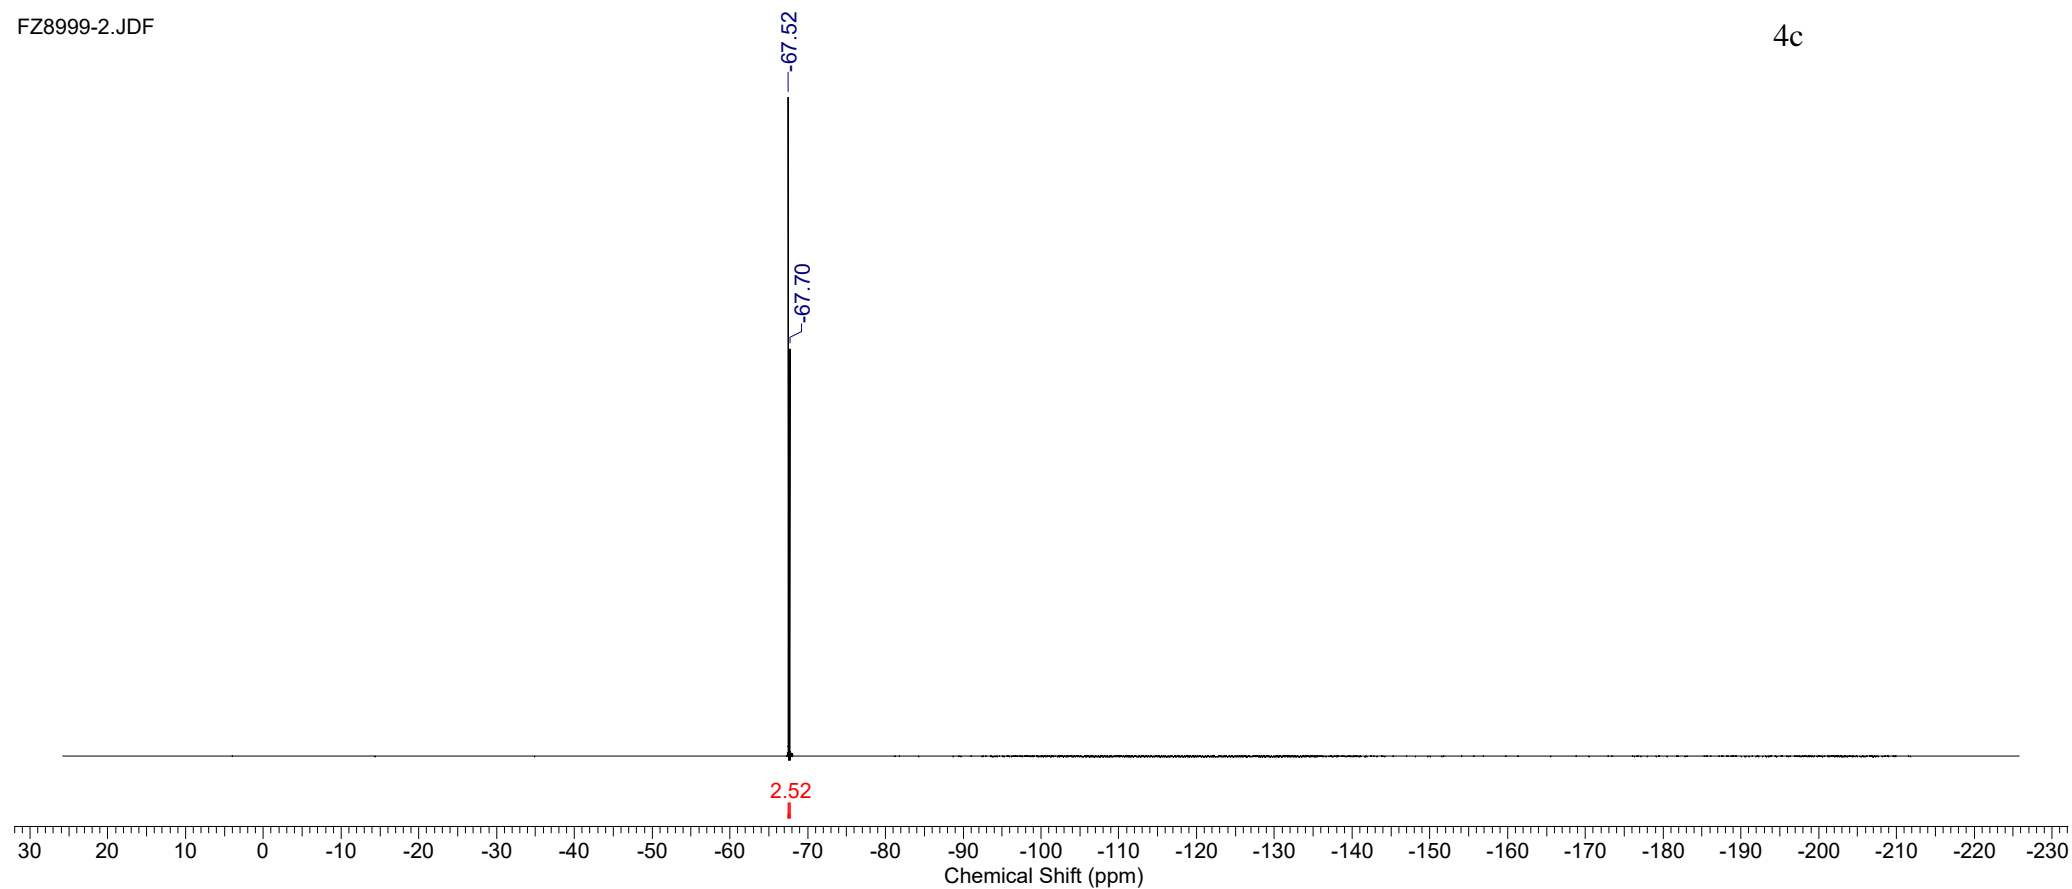



|                                                                                             |                    |
|---------------------------------------------------------------------------------------------|--------------------|
| <b>Formula</b> C <sub>17</sub> H <sub>15</sub> F <sub>3</sub> N <sub>2</sub> O <sub>5</sub> | <b>FW</b> 384.3066 |
|---------------------------------------------------------------------------------------------|--------------------|

|                                                          |                                    |                                         |                                        |
|----------------------------------------------------------|------------------------------------|-----------------------------------------|----------------------------------------|
| <b>Acquisition Time (sec)</b> 0.4614                     | <b>Comment</b> single_pulse        | <b>Date</b> 20 Aug 2020 09:01:25        | <b>Date Stamp</b> 20 Aug 2020 09:02:31 |
| <b>File Name</b> C:\USERS\Лабa534\DOWNLOADS\FZ8999-2.JDF | <b>Frequency (MHz)</b> 564.73      | <b>Nucleus</b> 19F                      | <b>Number of Transients</b> 16         |
| <b>Origin</b> ECA 600                                    | <b>Original Points Count</b> 65536 | <b>Owner</b> CKP                        | <b>Pulse Sequence</b> single_pulse.ex2 |
| <b>Receiver Gain</b> 40.00                               | <b>Solvent</b> CHLOROFORM-d        | <b>Spectrum Offset (Hz)</b> -56472.6094 | <b>Sweep Width (Hz)</b> 142045.45      |



4c

FZ8999-2.JDF

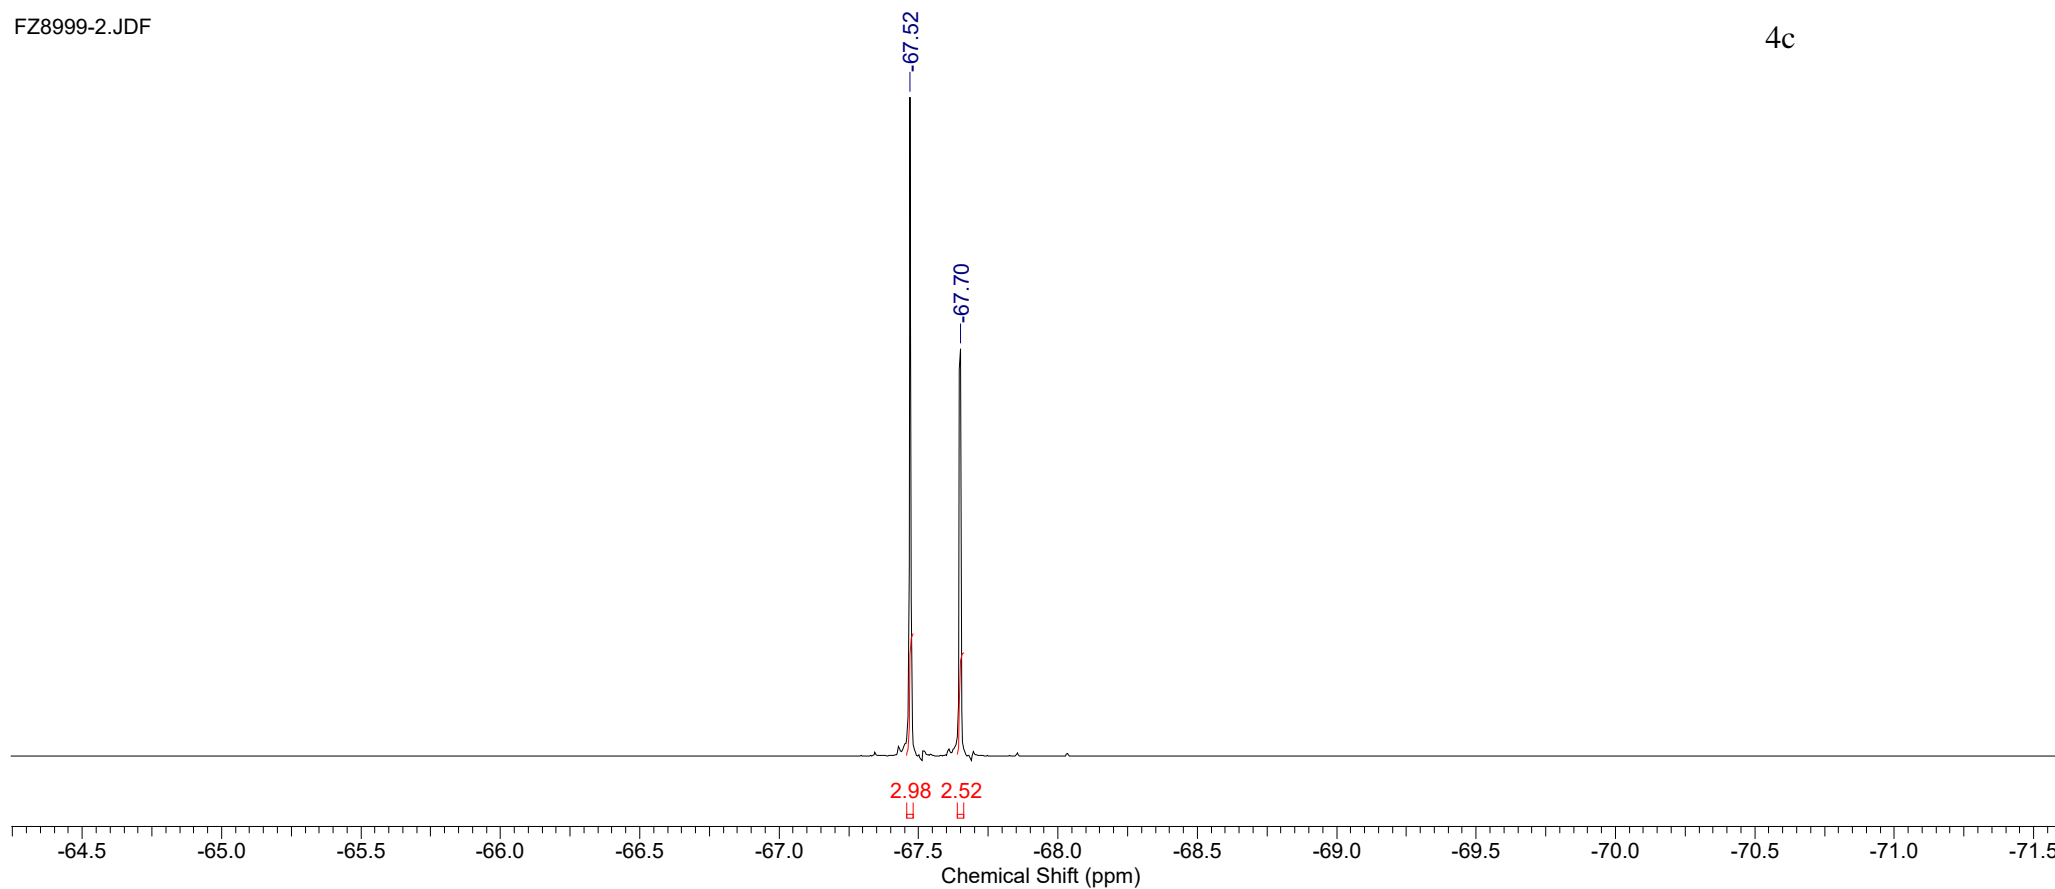

|                                                                |                    |
|----------------------------------------------------------------|--------------------|
| <b>Formula</b> C <sub>15</sub> H <sub>15</sub> NO <sub>5</sub> | <b>FW</b> 289.2833 |
|----------------------------------------------------------------|--------------------|

|                                                          |                                    |                                       |                                        |
|----------------------------------------------------------|------------------------------------|---------------------------------------|----------------------------------------|
| <b>Acquisition Time (sec)</b> 1.2111                     | <b>Comment</b> single_pulse        | <b>Date</b> 25 Mar 2015 13:19:23      | <b>Date Stamp</b> 25 Mar 2015 12:25:17 |
| <b>File Name</b> C:\USERS\Лабa534\DOWNLOADS\FZ4161-1.JDF | <b>Frequency (MHz)</b> 600.17      | <b>Nucleus</b> 1H                     | <b>Number of Transients</b> 8          |
| <b>Origin</b> ECA 600                                    | <b>Original Points Count</b> 16384 | <b>Owner</b> delta                    | <b>Pulse Sequence</b> single_pulse.ex2 |
| <b>Receiver Gain</b> 38.00                               | <b>Solvent</b> CHLOROFORM-d        | <b>Spectrum Offset (Hz)</b> 3616.3391 | <b>Sweep Width (Hz)</b> 13528.14       |

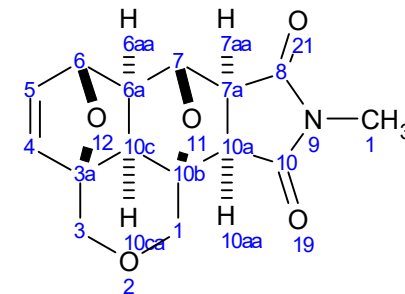

4e

FZ4161-1.esp

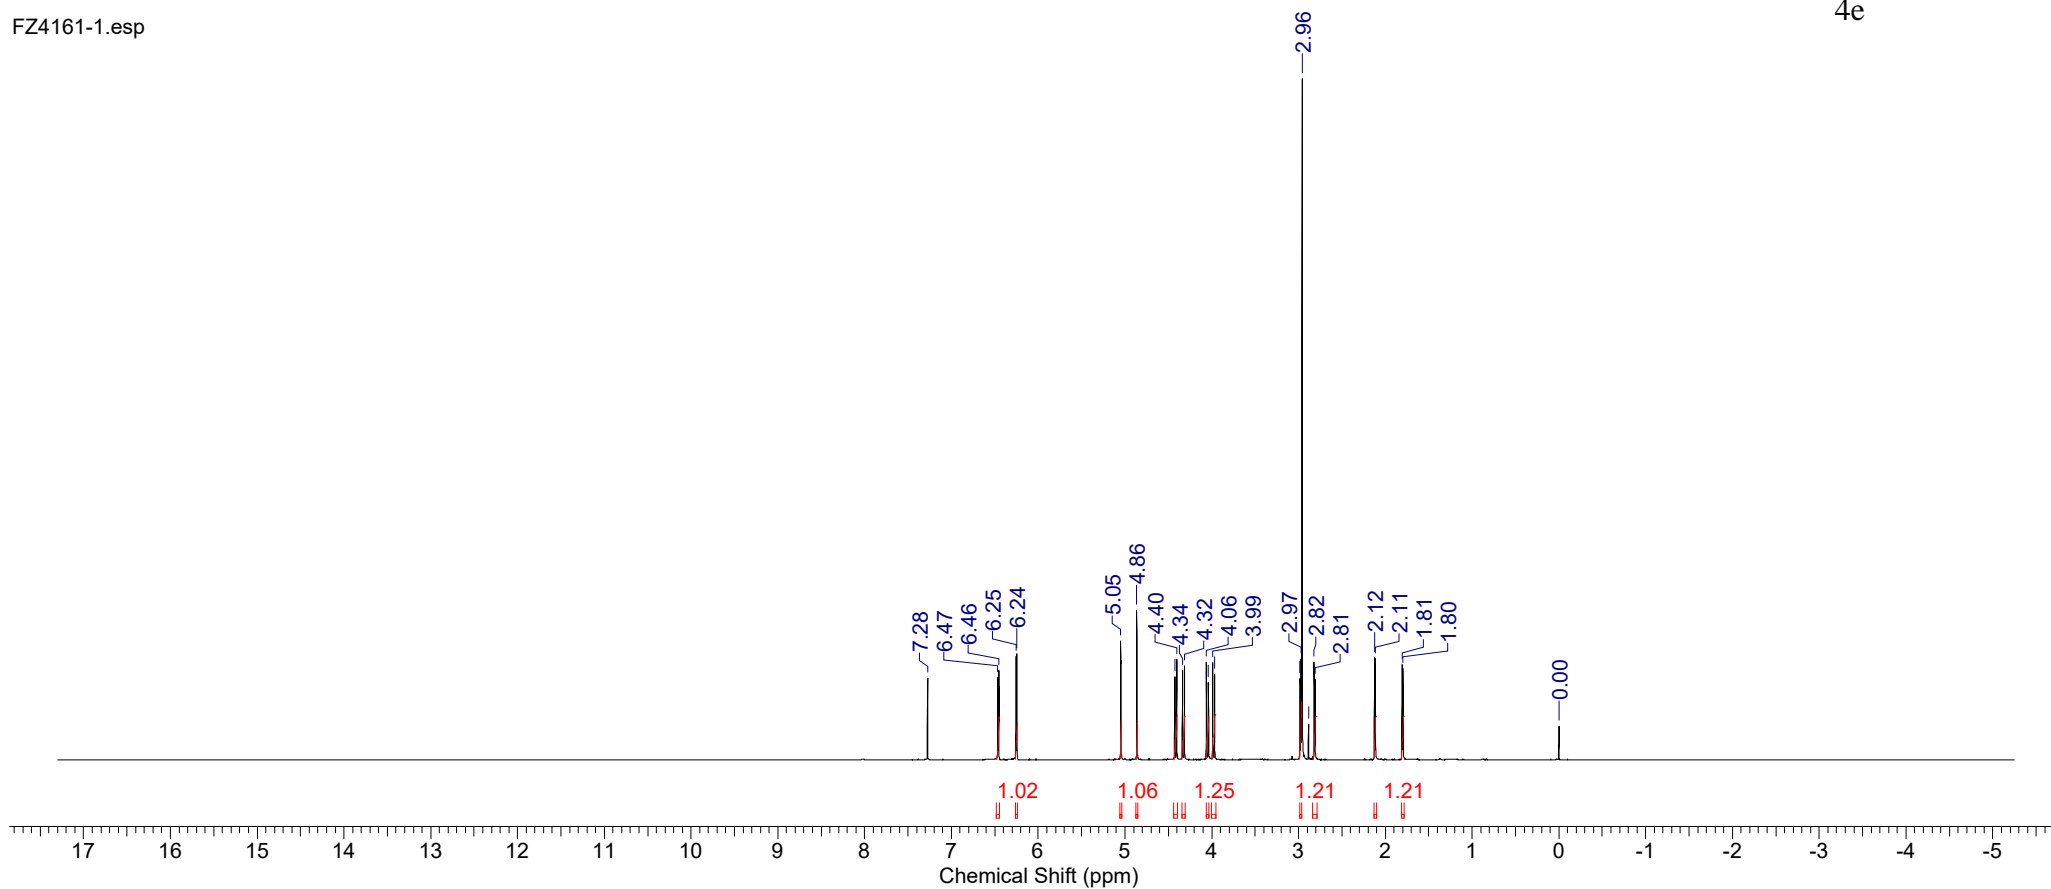

|                                                                |                    |
|----------------------------------------------------------------|--------------------|
| <b>Formula</b> C <sub>15</sub> H <sub>15</sub> NO <sub>5</sub> | <b>FW</b> 289.2833 |
|----------------------------------------------------------------|--------------------|

|                                                           |                                    |                                       |                                        |
|-----------------------------------------------------------|------------------------------------|---------------------------------------|----------------------------------------|
| <b>Acquisition Time (sec)</b> 1.2111                      | <b>Comment</b> single_pulse        | <b>Date</b> 25 Mar 2015 13:19:23      | <b>Date Stamp</b> 25 Mar 2015 12:25:17 |
| <b>File Name</b> C:\USERS\Лаб6a534\DOWNLOADS\FZ4161-1.JDF | <b>Frequency (MHz)</b> 600.17      | <b>Nucleus</b> 1H                     | <b>Number of Transients</b> 8          |
| <b>Origin</b> ECA 600                                     | <b>Original Points Count</b> 16384 | <b>Owner</b> delta                    | <b>Pulse Sequence</b> single_pulse.ex2 |
| <b>Receiver Gain</b> 38.00                                | <b>Solvent</b> CHLOROFORM-d        | <b>Spectrum Offset (Hz)</b> 3616.3391 | <b>Sweep Width (Hz)</b> 13528.14       |

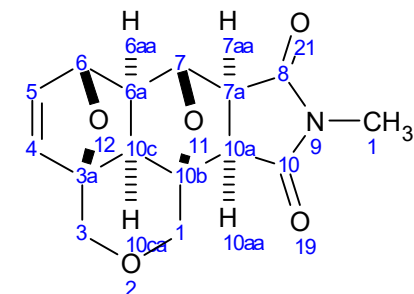

4e

FZ4161-1.esp

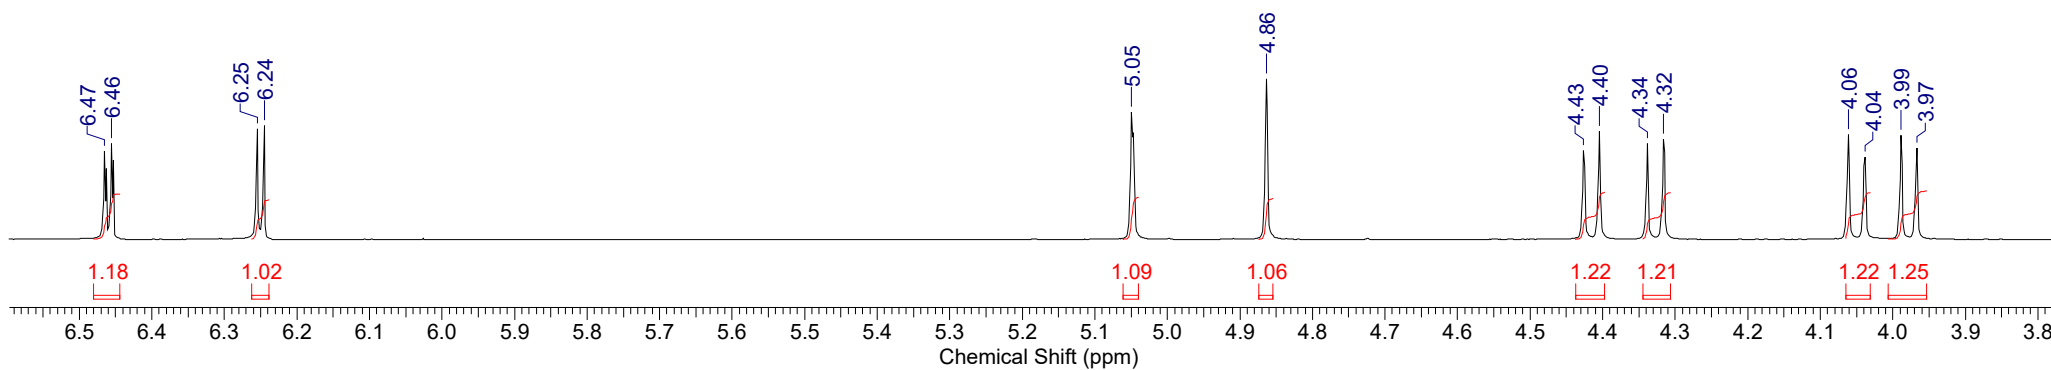

|                                                                |                    |
|----------------------------------------------------------------|--------------------|
| <b>Formula</b> C <sub>15</sub> H <sub>15</sub> NO <sub>5</sub> | <b>FW</b> 289.2833 |
|----------------------------------------------------------------|--------------------|

|                                                          |                                    |                                       |                                        |
|----------------------------------------------------------|------------------------------------|---------------------------------------|----------------------------------------|
| <b>Acquisition Time (sec)</b> 1.2111                     | <b>Comment</b> single_pulse        | <b>Date</b> 25 Mar 2015 13:19:23      | <b>Date Stamp</b> 25 Mar 2015 12:25:17 |
| <b>File Name</b> C:\USERS\Лабa534\DOWNLOADS\FZ4161-1.JDF | <b>Frequency (MHz)</b> 600.17      | <b>Nucleus</b> 1H                     | <b>Number of Transients</b> 8          |
| <b>Origin</b> ECA 600                                    | <b>Original Points Count</b> 16384 | <b>Owner</b> delta                    | <b>Pulse Sequence</b> single_pulse.ex2 |
| <b>Receiver Gain</b> 38.00                               | <b>Solvent</b> CHLOROFORM-d        | <b>Spectrum Offset (Hz)</b> 3616.3391 | <b>Sweep Width (Hz)</b> 13528.14       |

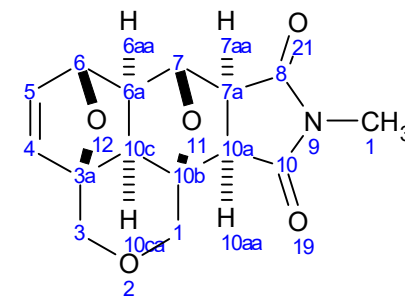

4e

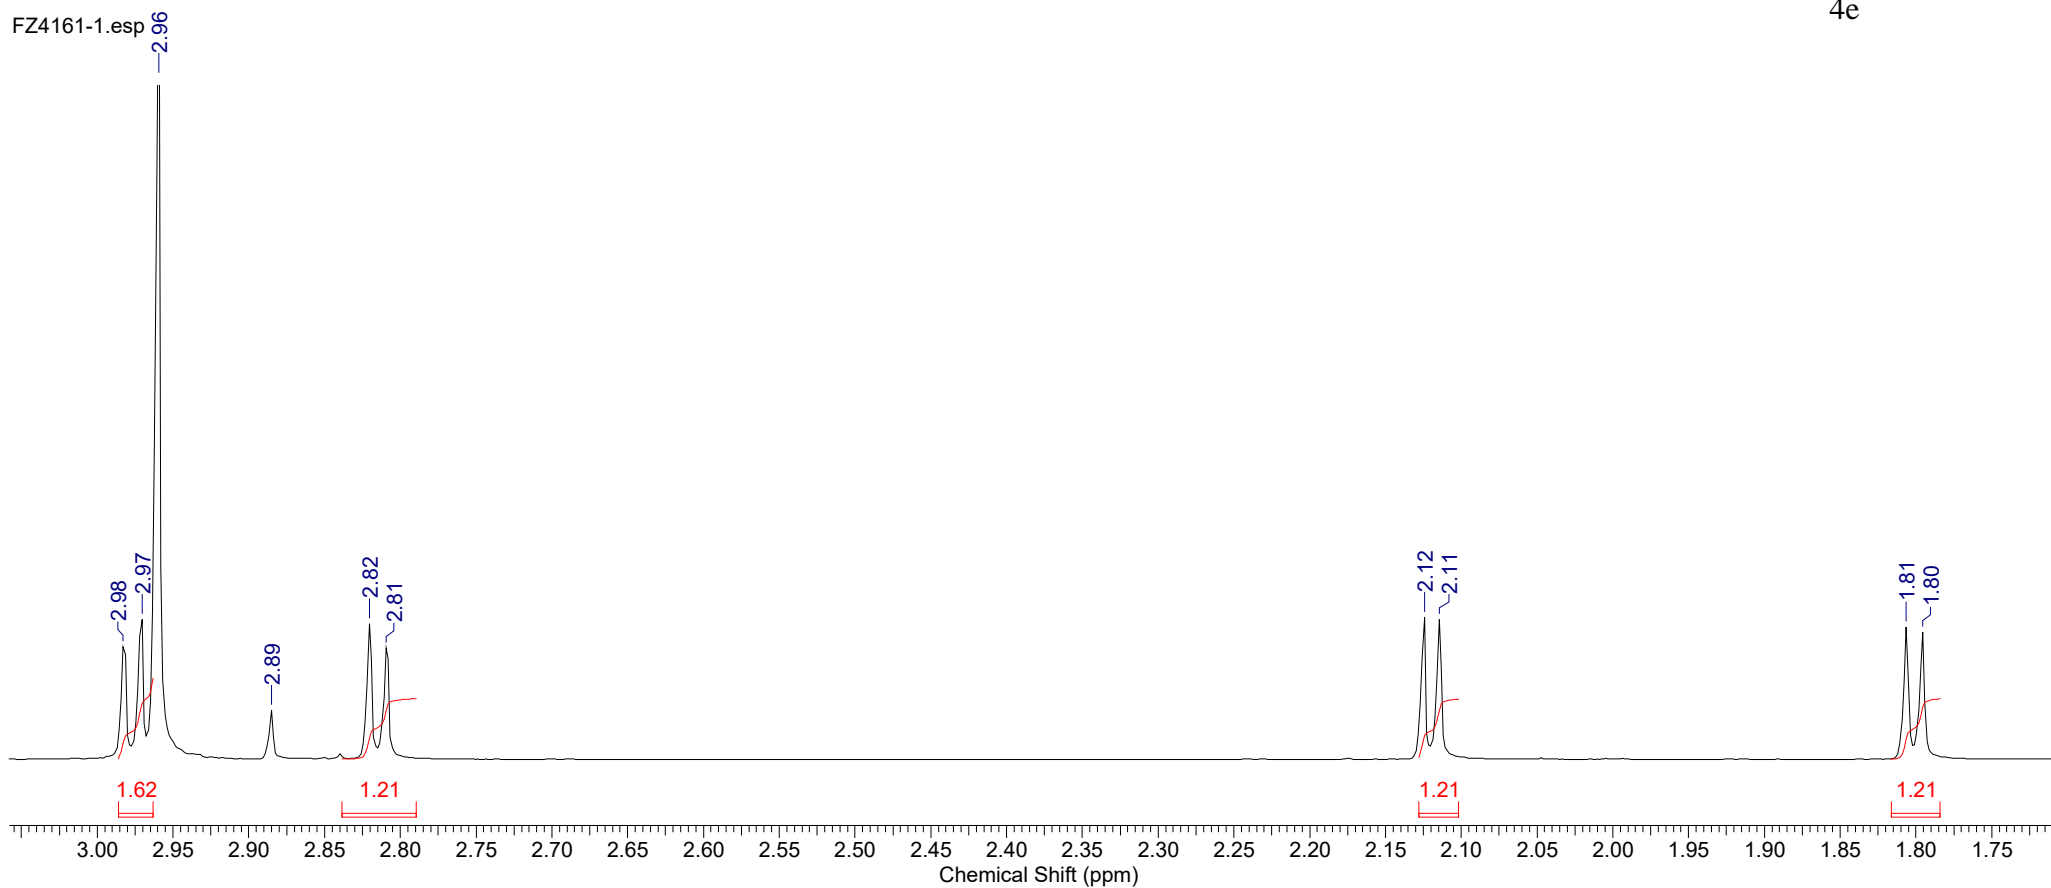

|                                                                |                    |
|----------------------------------------------------------------|--------------------|
| <b>Formula</b> C <sub>15</sub> H <sub>15</sub> NO <sub>5</sub> | <b>FW</b> 289.2833 |
|----------------------------------------------------------------|--------------------|

|                                        |                                                          |                                        |
|----------------------------------------|----------------------------------------------------------|----------------------------------------|
| <b>Acquisition Time (sec)</b> 0.6921   | <b>Comment</b> single pulse decoupled gated NOE          | <b>Date</b> 05 May 2015 10:23:47       |
| <b>Date Stamp</b> 05 May 2015 09:30:16 | <b>File Name</b> C:\USERS\Лабa534\DOWNLOADS\FZ4273-1.JDF |                                        |
| <b>Frequency (MHz)</b> 150.91          | <b>Nucleus</b> 13C                                       | <b>Number of Transients</b> 100        |
| <b>Original Points Count</b> 32768     | <b>Owner</b> delta                                       | <b>Points Count</b> 32768              |
| <b>Receiver Gain</b> 52.00             | <b>Solvent</b> CHLOROFORM-d                              | <b>Pulse Sequence</b> single pulse dec |
| <b>Sweep Width (Hz)</b> 47348.49       | <b>Temperature (degree C)</b> 20.700                     | <b>Spectrum Offset (Hz)</b> 15091.3428 |

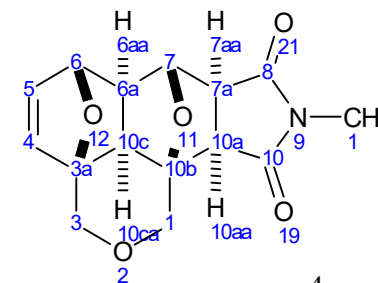

FZ4273-1.JDF

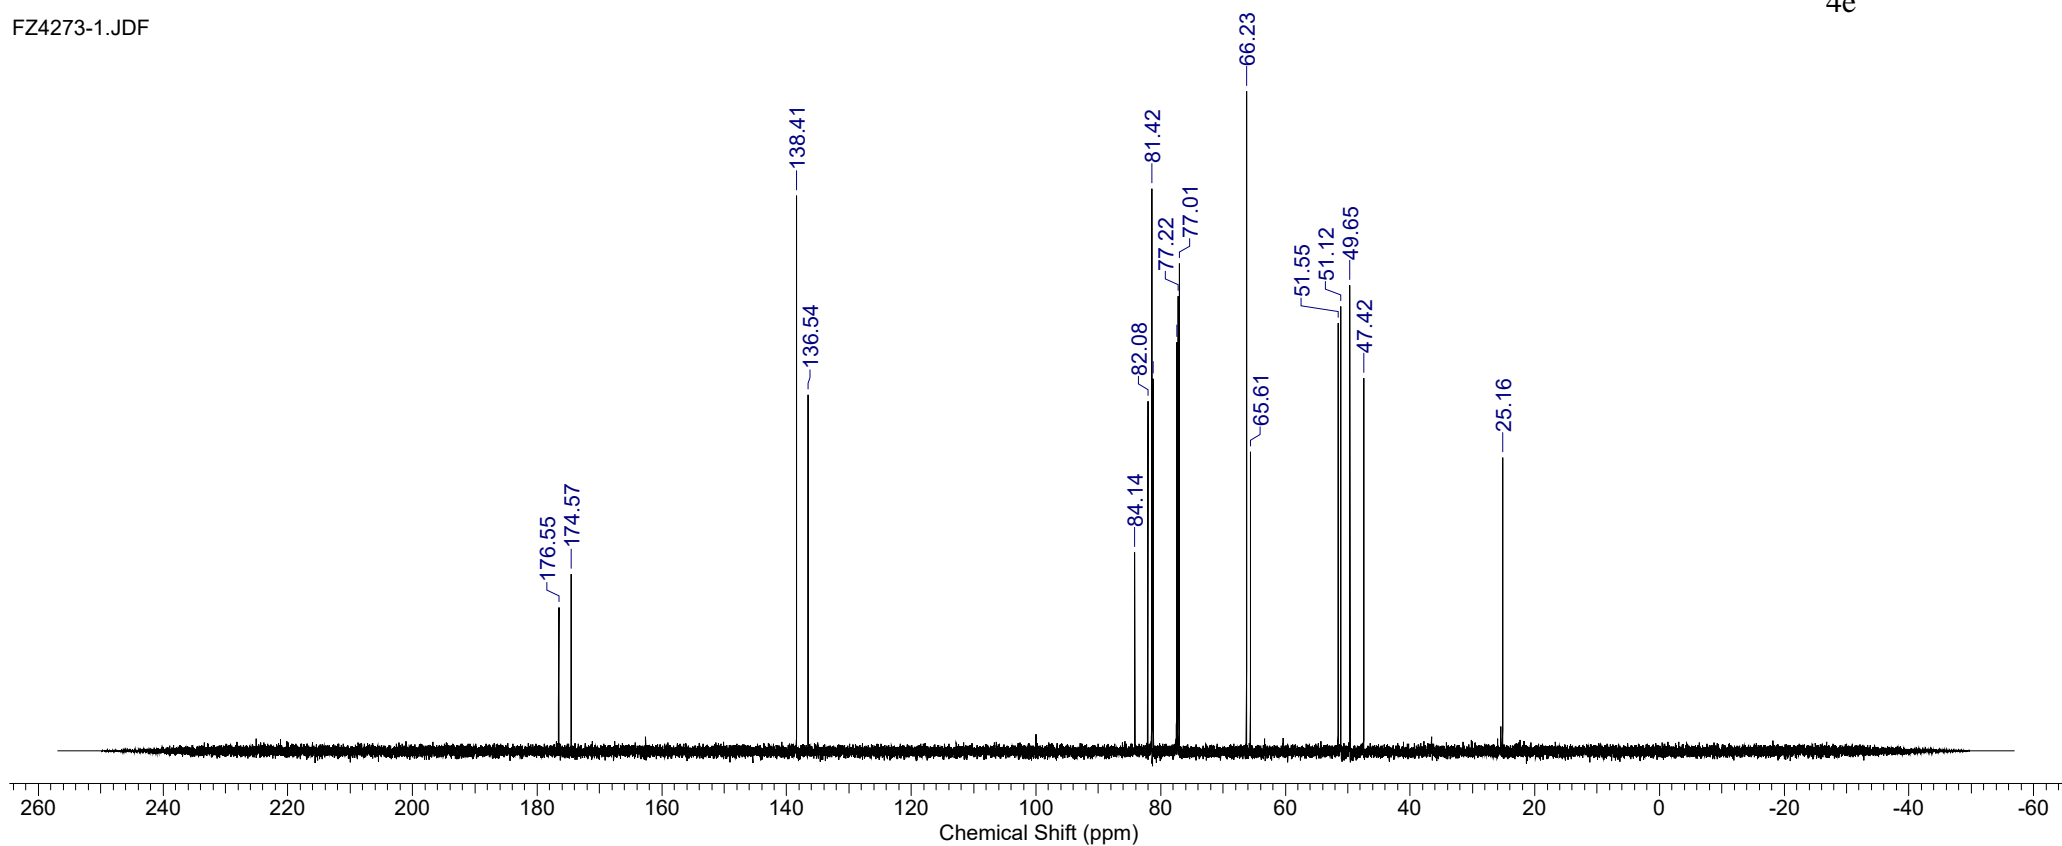

|                                                                |                    |
|----------------------------------------------------------------|--------------------|
| <b>Formula</b> C <sub>15</sub> H <sub>15</sub> NO <sub>5</sub> | <b>FW</b> 289.2833 |
|----------------------------------------------------------------|--------------------|

|                               |                      |                               |                                         |                             |                      |
|-------------------------------|----------------------|-------------------------------|-----------------------------------------|-----------------------------|----------------------|
| <b>Acquisition Time (sec)</b> | 0.6921               | <b>Comment</b>                | single pulse decoupled gated NOE        | <b>Date</b>                 | 05 May 2015 10:23:47 |
| <b>Date Stamp</b>             | 05 May 2015 09:30:16 | <b>File Name</b>              | C:\USERS\Лабa534\DOWNLOADS\FZ4273-1.JDF |                             |                      |
| <b>Frequency (MHz)</b>        | 150.91               | <b>Nucleus</b>                | 13C                                     | <b>Number of Transients</b> | 100                  |
| <b>Original Points Count</b>  | 32768                | <b>Owner</b>                  | delta                                   | <b>Points Count</b>         | 32768                |
| <b>Receiver Gain</b>          | 52.00                | <b>Solvent</b>                | CHLOROFORM-d                            | <b>Pulse Sequence</b>       | single pulse dec     |
| <b>Sweep Width (Hz)</b>       | 47348.49             | <b>Temperature (degree C)</b> | 20.700                                  | <b>Spectrum Offset (Hz)</b> | 15091.3428           |

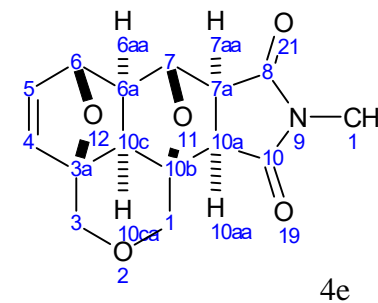

FZ4273-1.JDF

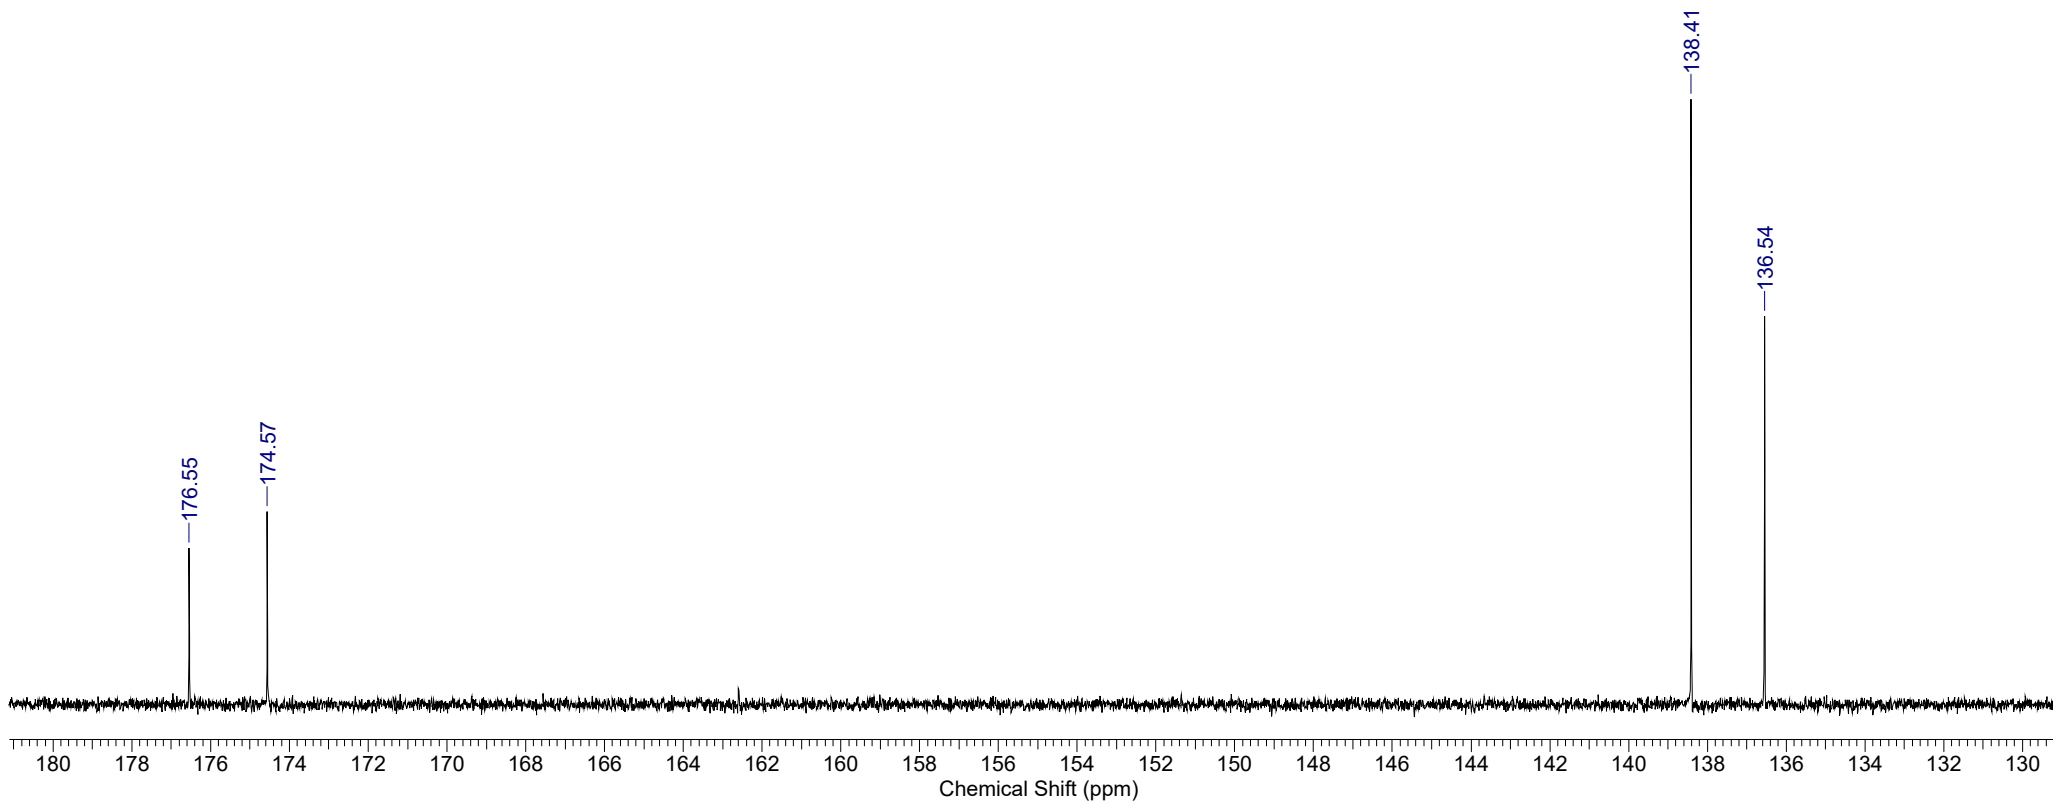

|                                                                |                    |
|----------------------------------------------------------------|--------------------|
| <b>Formula</b> C <sub>15</sub> H <sub>15</sub> NO <sub>5</sub> | <b>FW</b> 289.2833 |
|----------------------------------------------------------------|--------------------|

|                                        |                                                          |                                        |
|----------------------------------------|----------------------------------------------------------|----------------------------------------|
| <b>Acquisition Time (sec)</b> 0.6921   | <b>Comment</b> single pulse decoupled gated NOE          | <b>Date</b> 05 May 2015 10:23:47       |
| <b>Date Stamp</b> 05 May 2015 09:30:16 | <b>File Name</b> C:\USERS\Лабa534\DOWNLOADS\FZ4273-1.JDF |                                        |
| <b>Frequency (MHz)</b> 150.91          | <b>Nucleus</b> 13C                                       | <b>Number of Transients</b> 100        |
| <b>Original Points Count</b> 32768     | <b>Owner</b> delta                                       | <b>Points Count</b> 32768              |
| <b>Receiver Gain</b> 52.00             | <b>Solvent</b> CHLOROFORM-d                              | <b>Pulse Sequence</b> single pulse dec |
| <b>Sweep Width (Hz)</b> 47348.49       | <b>Temperature (degree C)</b> 20.700                     | <b>Spectrum Offset (Hz)</b> 15091.3428 |

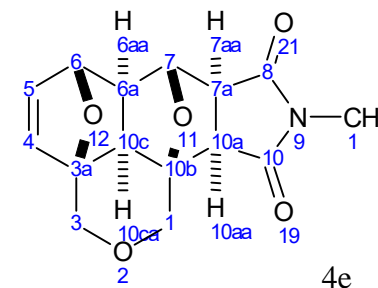

FZ4273-1.JDF

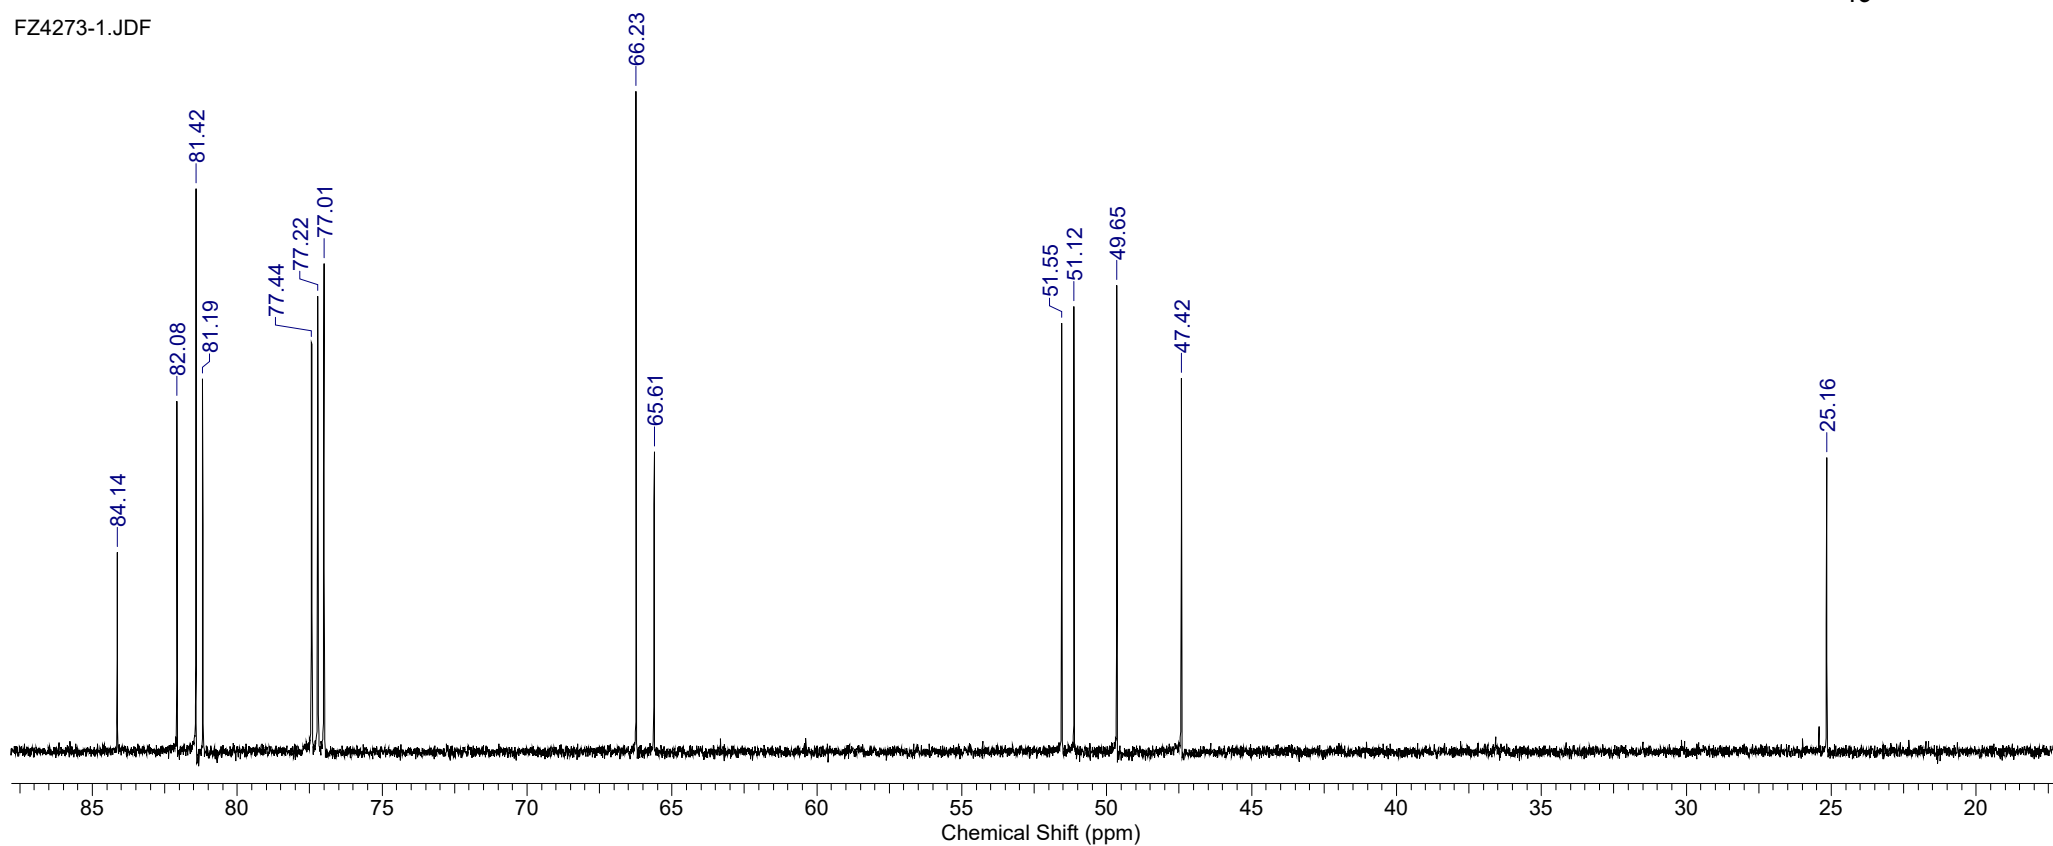

|                                                                  |                    |
|------------------------------------------------------------------|--------------------|
| <b>Formula</b> C <sub>15</sub> H <sub>15</sub> NO <sub>4</sub> S | <b>FW</b> 305.3489 |
|------------------------------------------------------------------|--------------------|

|                                                           |                                    |                                       |                                        |
|-----------------------------------------------------------|------------------------------------|---------------------------------------|----------------------------------------|
| <b>Acquisition Time (sec)</b> 1.2111                      | <b>Comment</b> single_pulse        | <b>Date</b> 25 Mar 2015 12:57:37      | <b>Date Stamp</b> 25 Mar 2015 12:03:31 |
| <b>File Name</b> C:\USERS\Лаб6а534\DOWNLOADS\FZ4162-1.JDF | <b>Frequency (MHz)</b> 600.17      | <b>Nucleus</b> 1H                     | <b>Number of Transients</b> 8          |
| <b>Origin</b> ECA 600                                     | <b>Original Points Count</b> 16384 | <b>Owner</b> delta                    | <b>Pulse Sequence</b> single_pulse.ex2 |
| <b>Receiver Gain</b> 40.00                                | <b>Solvent</b> CHLOROFORM-d        | <b>Spectrum Offset (Hz)</b> 3614.6875 | <b>Sweep Width (Hz)</b> 13528.14       |

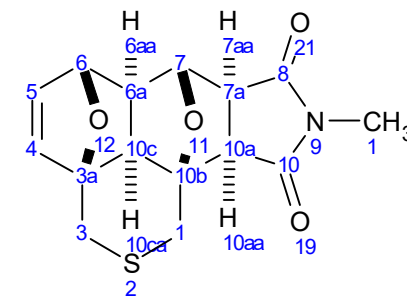

4f

FZ4162-1.JDF

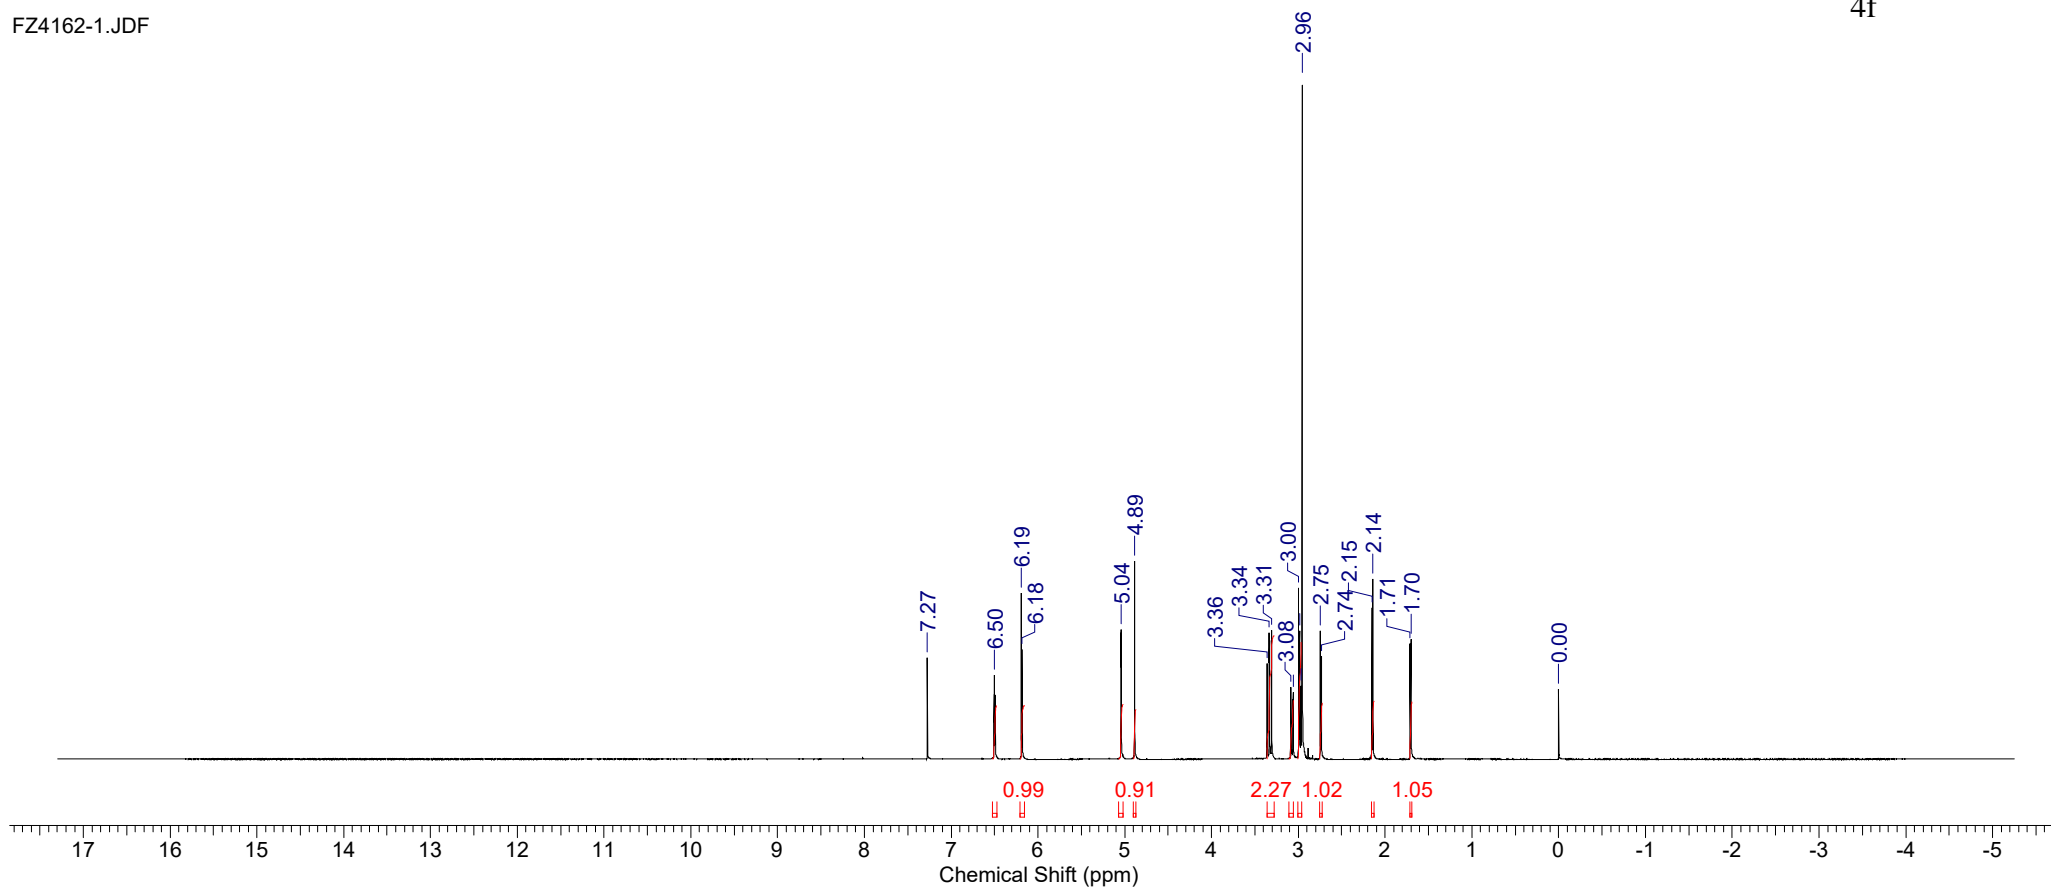



|                                                                  |                    |
|------------------------------------------------------------------|--------------------|
| <b>Formula</b> C <sub>15</sub> H <sub>15</sub> NO <sub>4</sub> S | <b>FW</b> 305.3489 |
|------------------------------------------------------------------|--------------------|

|                                                          |                                    |                                       |                                        |
|----------------------------------------------------------|------------------------------------|---------------------------------------|----------------------------------------|
| <b>Acquisition Time (sec)</b> 1.2111                     | <b>Comment</b> single_pulse        | <b>Date</b> 25 Mar 2015 12:57:37      | <b>Date Stamp</b> 25 Mar 2015 12:03:31 |
| <b>File Name</b> C:\USERS\Лабa534\DOWNLOADS\FZ4162-1.JDF | <b>Frequency (MHz)</b> 600.17      | <b>Nucleus</b> 1H                     | <b>Number of Transients</b> 8          |
| <b>Origin</b> ECA 600                                    | <b>Original Points Count</b> 16384 | <b>Owner</b> delta                    | <b>Pulse Sequence</b> single_pulse.ex2 |
| <b>Receiver Gain</b> 40.00                               | <b>Solvent</b> CHLOROFORM-d        | <b>Spectrum Offset (Hz)</b> 3614.6875 | <b>Sweep Width (Hz)</b> 13528.14       |

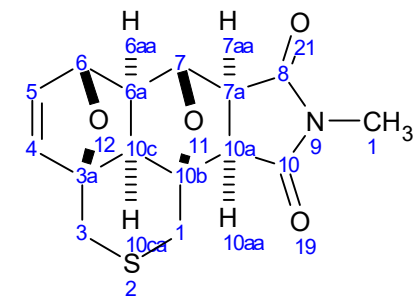

4f

FZ4162-1.JDF

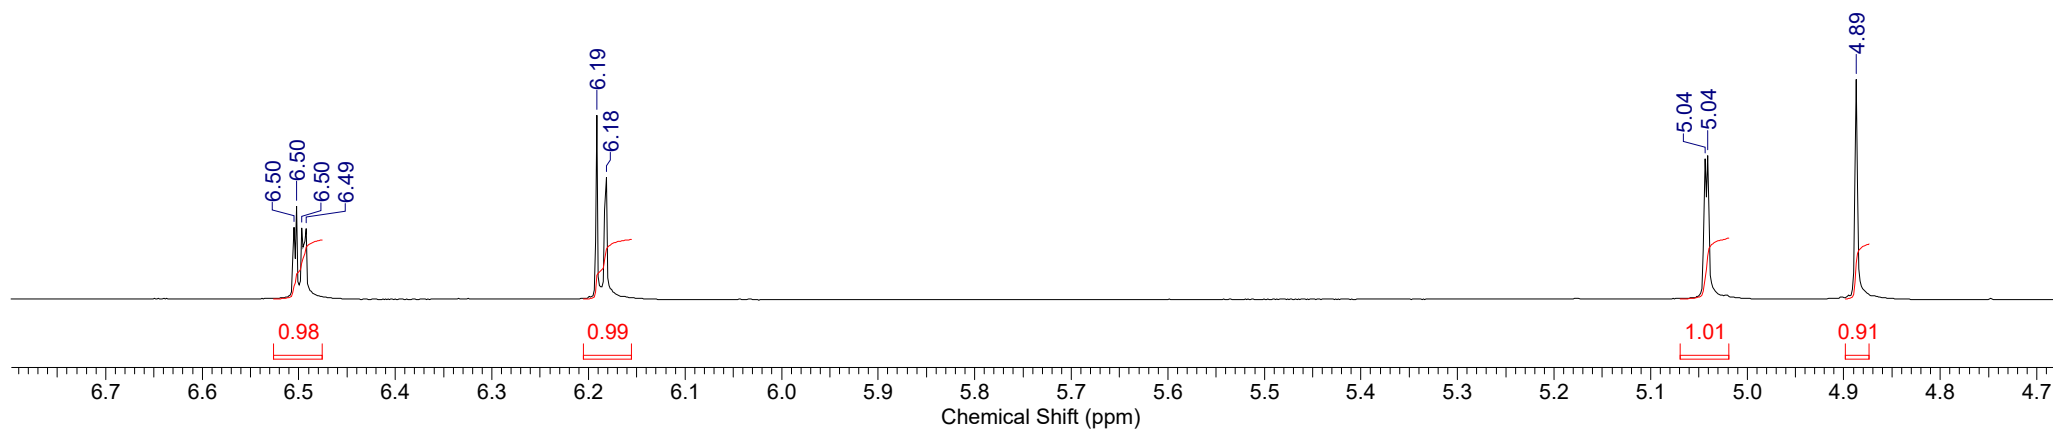

|                                                                  |                    |
|------------------------------------------------------------------|--------------------|
| <b>Formula</b> C <sub>15</sub> H <sub>15</sub> NO <sub>4</sub> S | <b>FW</b> 305.3489 |
|------------------------------------------------------------------|--------------------|

|                                                          |                                    |                                       |                                        |
|----------------------------------------------------------|------------------------------------|---------------------------------------|----------------------------------------|
| <b>Acquisition Time (sec)</b> 1.2111                     | <b>Comment</b> single_pulse        | <b>Date</b> 25 Mar 2015 12:57:37      | <b>Date Stamp</b> 25 Mar 2015 12:03:31 |
| <b>File Name</b> C:\USERS\Лабa534\DOWNLOADS\FZ4162-1.JDF | <b>Frequency (MHz)</b> 600.17      | <b>Nucleus</b> 1H                     | <b>Number of Transients</b> 8          |
| <b>Origin</b> ECA 600                                    | <b>Original Points Count</b> 16384 | <b>Owner</b> delta                    | <b>Pulse Sequence</b> single_pulse.ex2 |
| <b>Receiver Gain</b> 40.00                               | <b>Solvent</b> CHLOROFORM-d        | <b>Spectrum Offset (Hz)</b> 3614.6875 | <b>Sweep Width (Hz)</b> 13528.14       |



4f

FZ4162-1.JDF

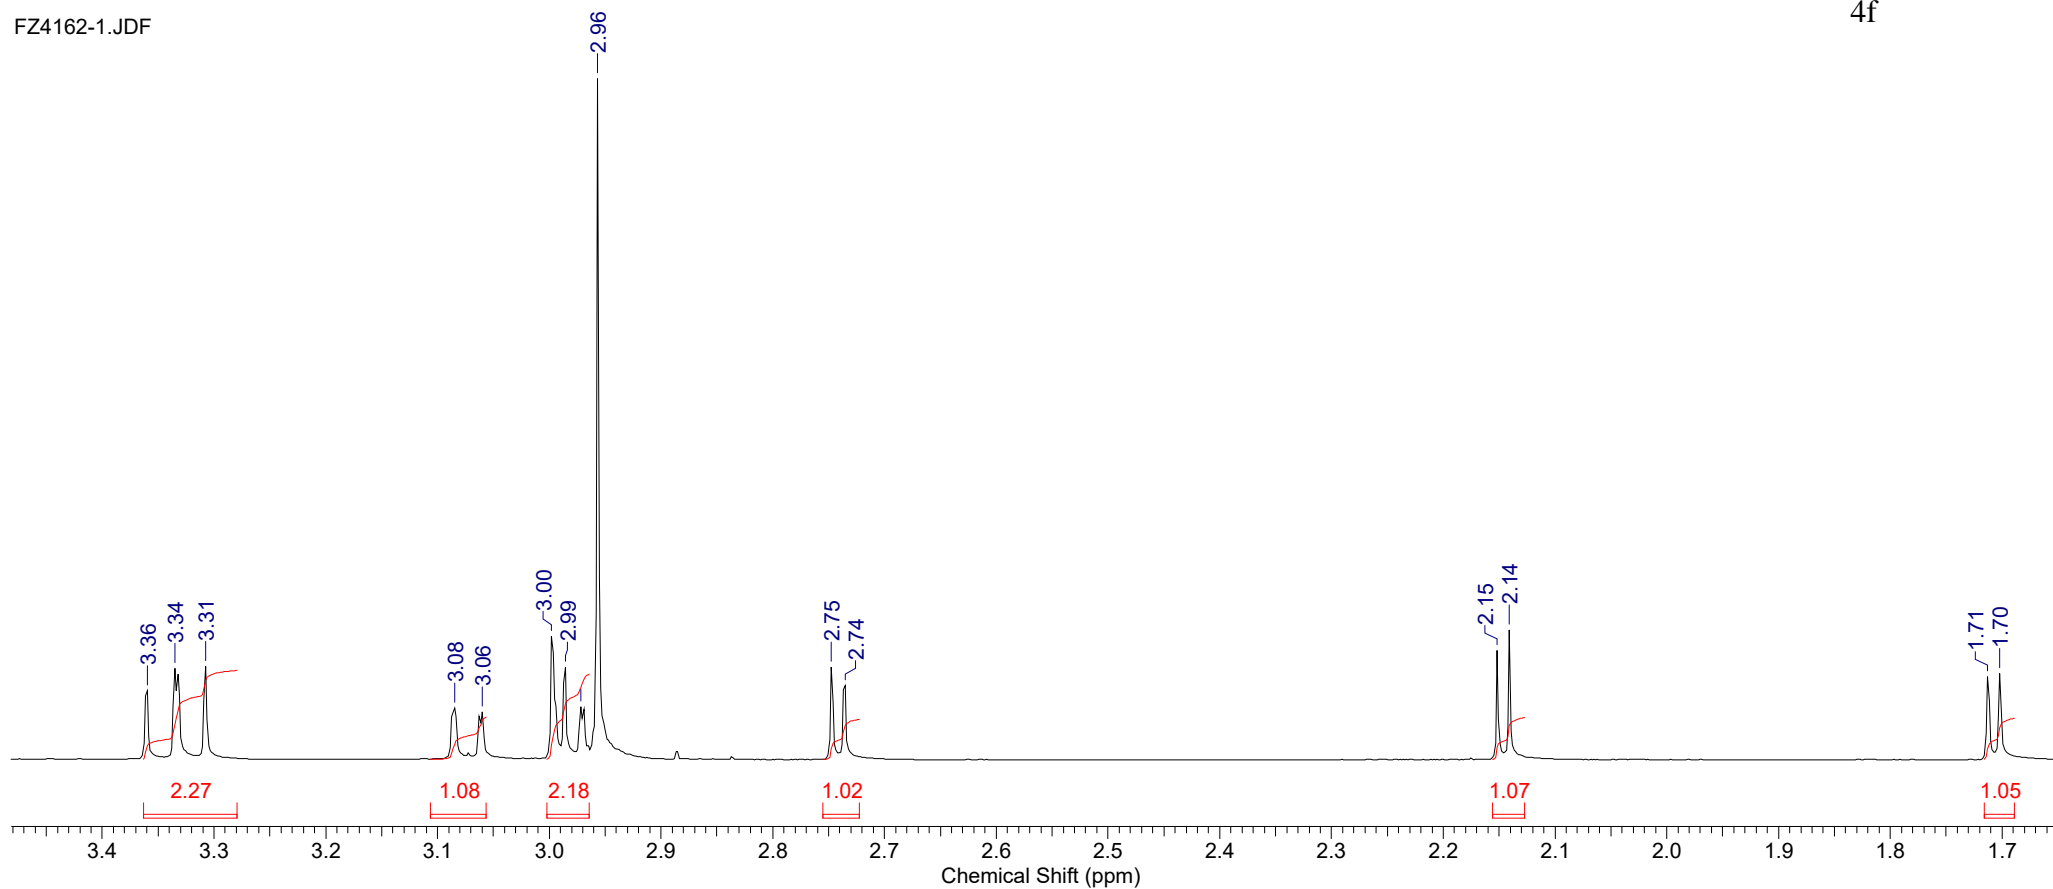

|                                                                  |                    |
|------------------------------------------------------------------|--------------------|
| <b>Formula</b> C <sub>15</sub> H <sub>15</sub> NO <sub>4</sub> S | <b>FW</b> 305.3489 |
|------------------------------------------------------------------|--------------------|

|                                        |                                                          |                                        |
|----------------------------------------|----------------------------------------------------------|----------------------------------------|
| <b>Acquisition Time (sec)</b> 0.6921   | <b>Comment</b> single pulse decoupled gated NOE          | <b>Date</b> 05 May 2015 10:38:15       |
| <b>Date Stamp</b> 05 May 2015 09:44:44 | <b>File Name</b> C:\USERS\Лабa534\DOWNLOADS\FZ4272-1.JDF |                                        |
| <b>Frequency (MHz)</b> 150.91          | <b>Nucleus</b> 13C                                       | <b>Number of Transients</b> 100        |
| <b>Original Points Count</b> 32768     | <b>Owner</b> delta                                       | <b>Points Count</b> 32768              |
| <b>Receiver Gain</b> 52.00             | <b>Solvent</b> CHLOROFORM-d                              | <b>Pulse Sequence</b> single pulse dec |
| <b>Sweep Width (Hz)</b> 47348.49       | <b>Temperature (degree C)</b> 20.800                     | <b>Spectrum Offset (Hz)</b> 15091.3428 |

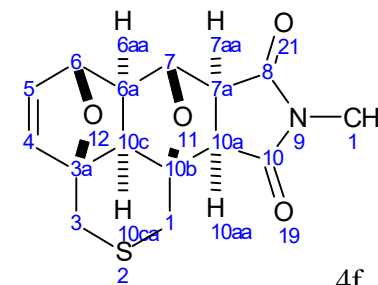

FZ4272-1.JDF

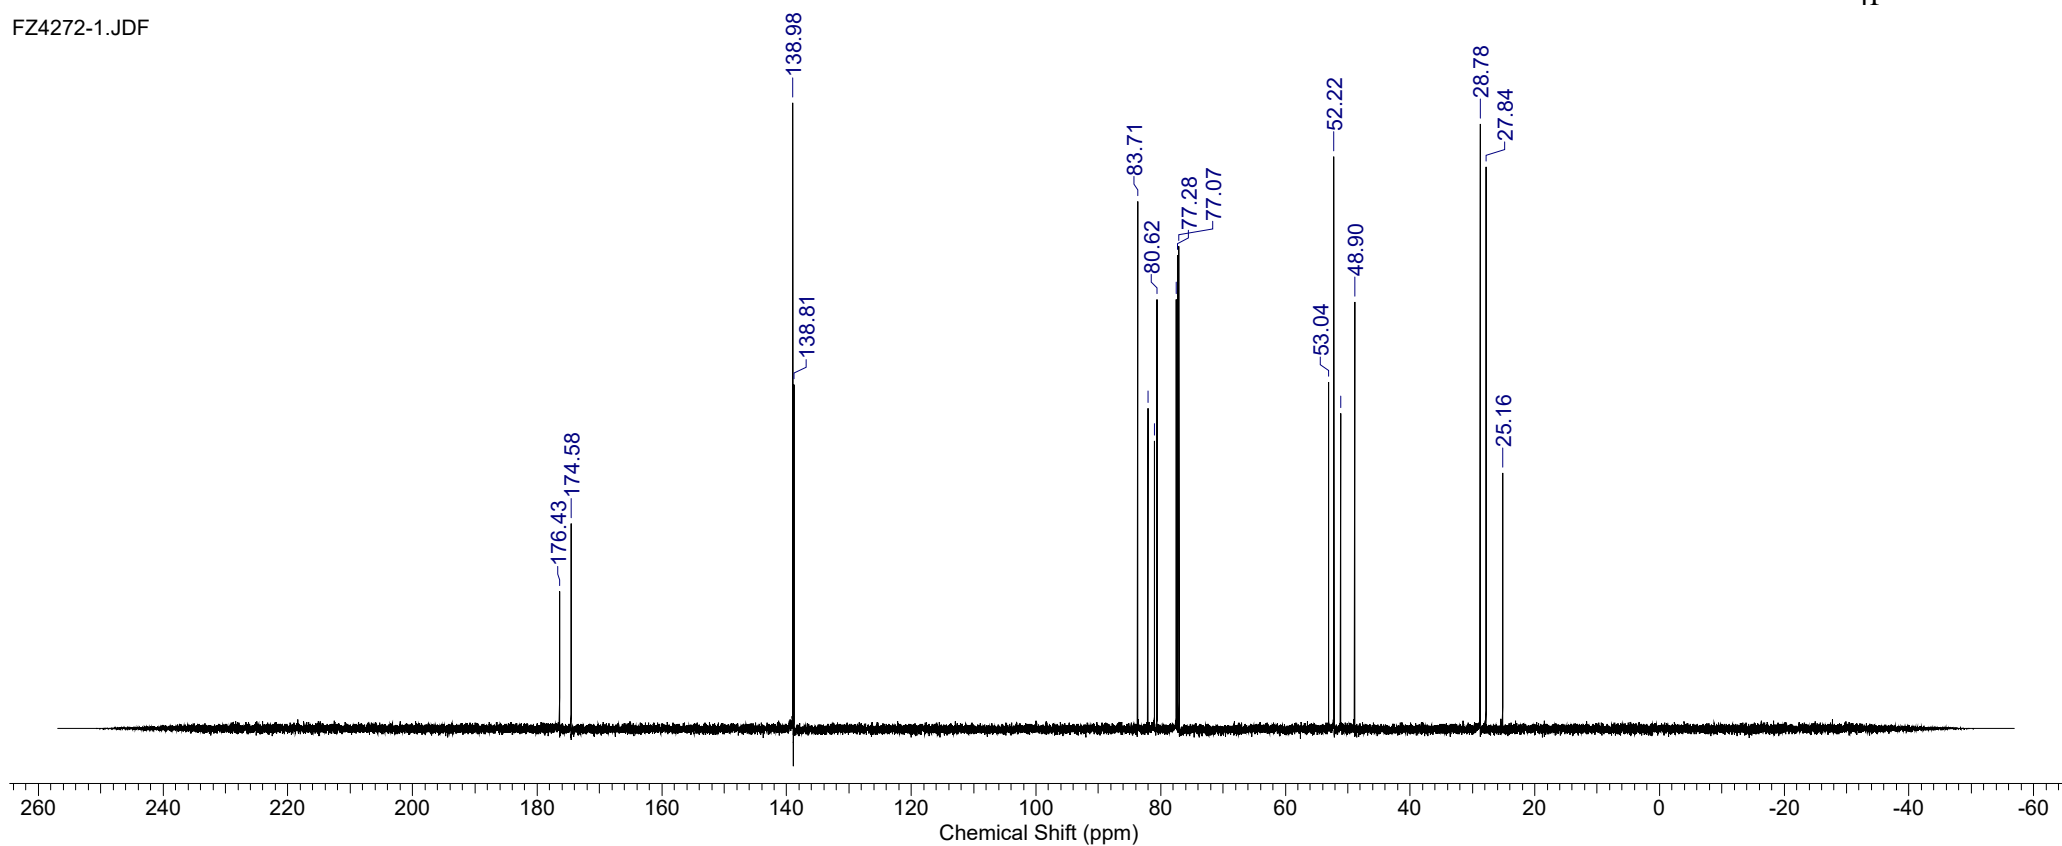

|                                                                  |                    |
|------------------------------------------------------------------|--------------------|
| <b>Formula</b> C <sub>15</sub> H <sub>15</sub> NO <sub>4</sub> S | <b>FW</b> 305.3489 |
|------------------------------------------------------------------|--------------------|

|                                        |                                                          |                                        |
|----------------------------------------|----------------------------------------------------------|----------------------------------------|
| <b>Acquisition Time (sec)</b> 0.6921   | <b>Comment</b> single pulse decoupled gated NOE          | <b>Date</b> 05 May 2015 10:38:15       |
| <b>Date Stamp</b> 05 May 2015 09:44:44 | <b>File Name</b> C:\USERS\Лабa534\DOWNLOADS\FZ4272-1.JDF |                                        |
| <b>Frequency (MHz)</b> 150.91          | <b>Nucleus</b> 13C                                       | <b>Number of Transients</b> 100        |
| <b>Original Points Count</b> 32768     | <b>Owner</b> delta                                       | <b>Points Count</b> 32768              |
| <b>Receiver Gain</b> 52.00             | <b>Solvent</b> CHLOROFORM-d                              | <b>Pulse Sequence</b> single pulse dec |
| <b>Sweep Width (Hz)</b> 47348.49       | <b>Temperature (degree C)</b> 20.800                     | <b>Spectrum Offset (Hz)</b> 15091.3428 |

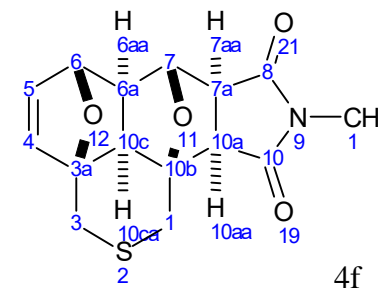

FZ4272-1.JDF

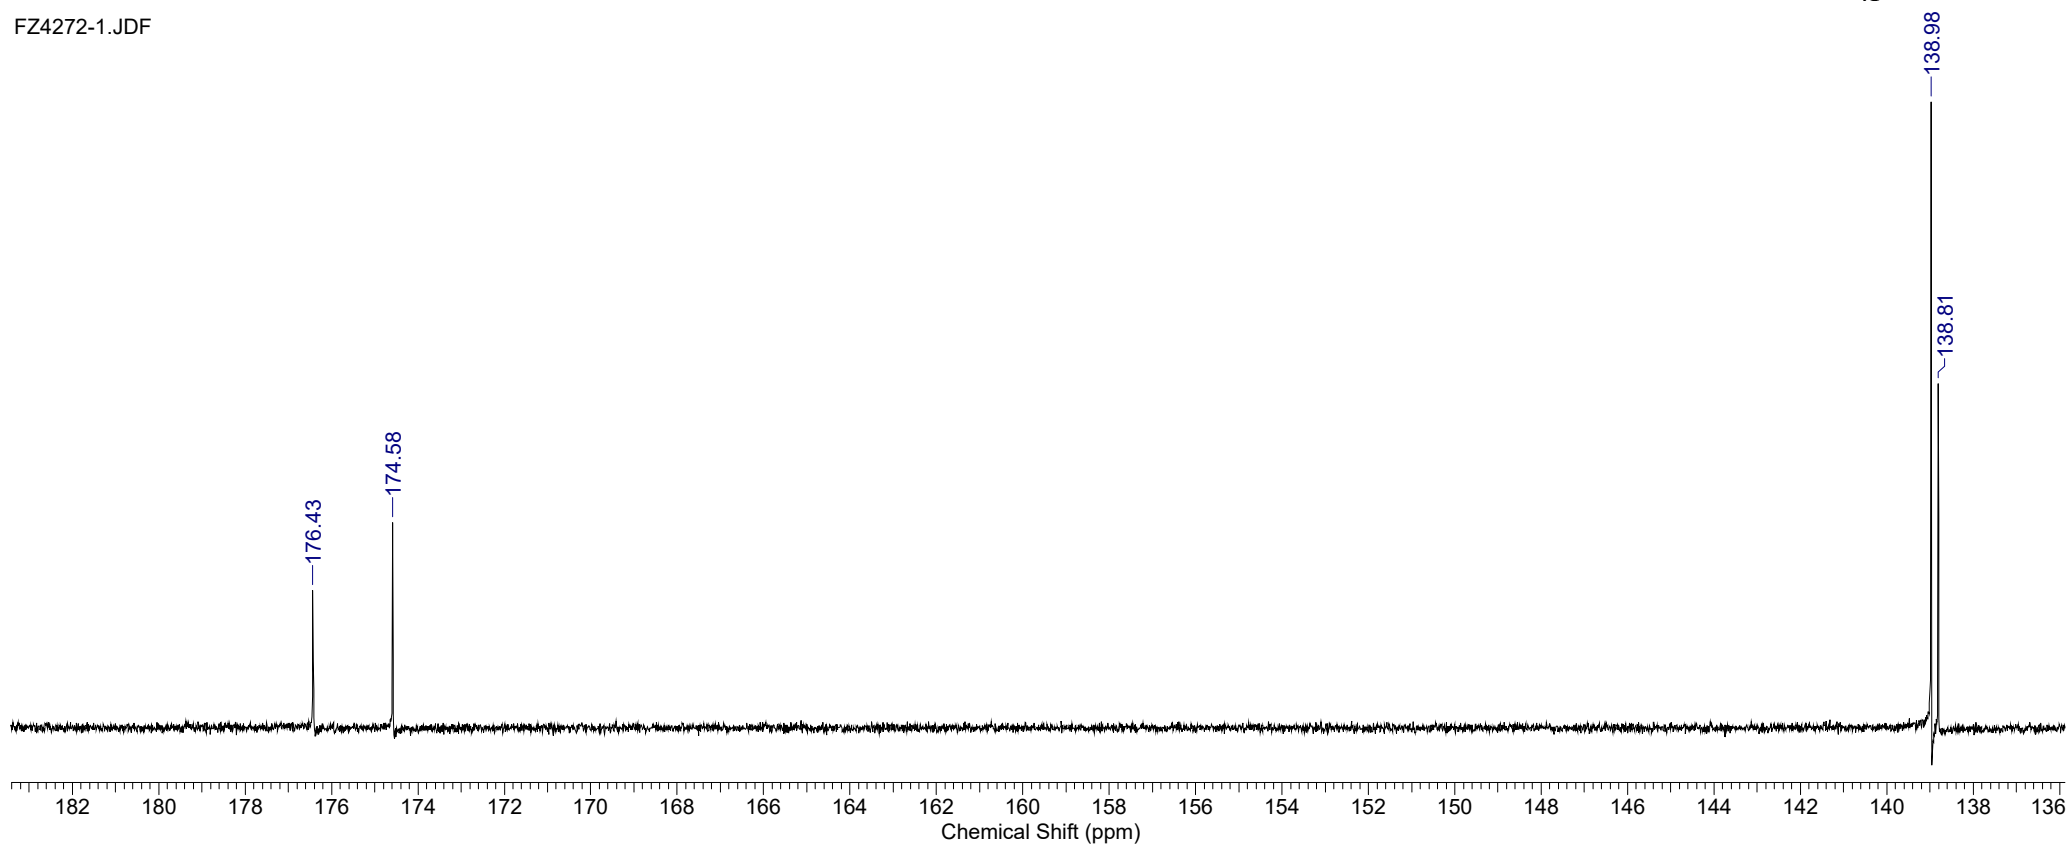

|                                                                  |                    |
|------------------------------------------------------------------|--------------------|
| <b>Formula</b> C <sub>15</sub> H <sub>15</sub> NO <sub>4</sub> S | <b>FW</b> 305.3489 |
|------------------------------------------------------------------|--------------------|

|                                        |                                                          |                                        |
|----------------------------------------|----------------------------------------------------------|----------------------------------------|
| <b>Acquisition Time (sec)</b> 0.6921   | <b>Comment</b> single pulse decoupled gated NOE          | <b>Date</b> 05 May 2015 10:38:15       |
| <b>Date Stamp</b> 05 May 2015 09:44:44 | <b>File Name</b> C:\USERS\Лабa534\DOWNLOADS\FZ4272-1.JDF |                                        |
| <b>Frequency (MHz)</b> 150.91          | <b>Nucleus</b> 13C                                       | <b>Number of Transients</b> 100        |
| <b>Original Points Count</b> 32768     | <b>Owner</b> delta                                       | <b>Points Count</b> 32768              |
| <b>Receiver Gain</b> 52.00             | <b>Solvent</b> CHLOROFORM-d                              | <b>Pulse Sequence</b> single pulse dec |
| <b>Sweep Width (Hz)</b> 47348.49       | <b>Temperature (degree C)</b> 20.800                     | <b>Spectrum Offset (Hz)</b> 15091.3428 |

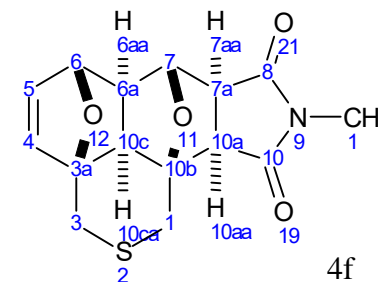

FZ4272-1.JDF

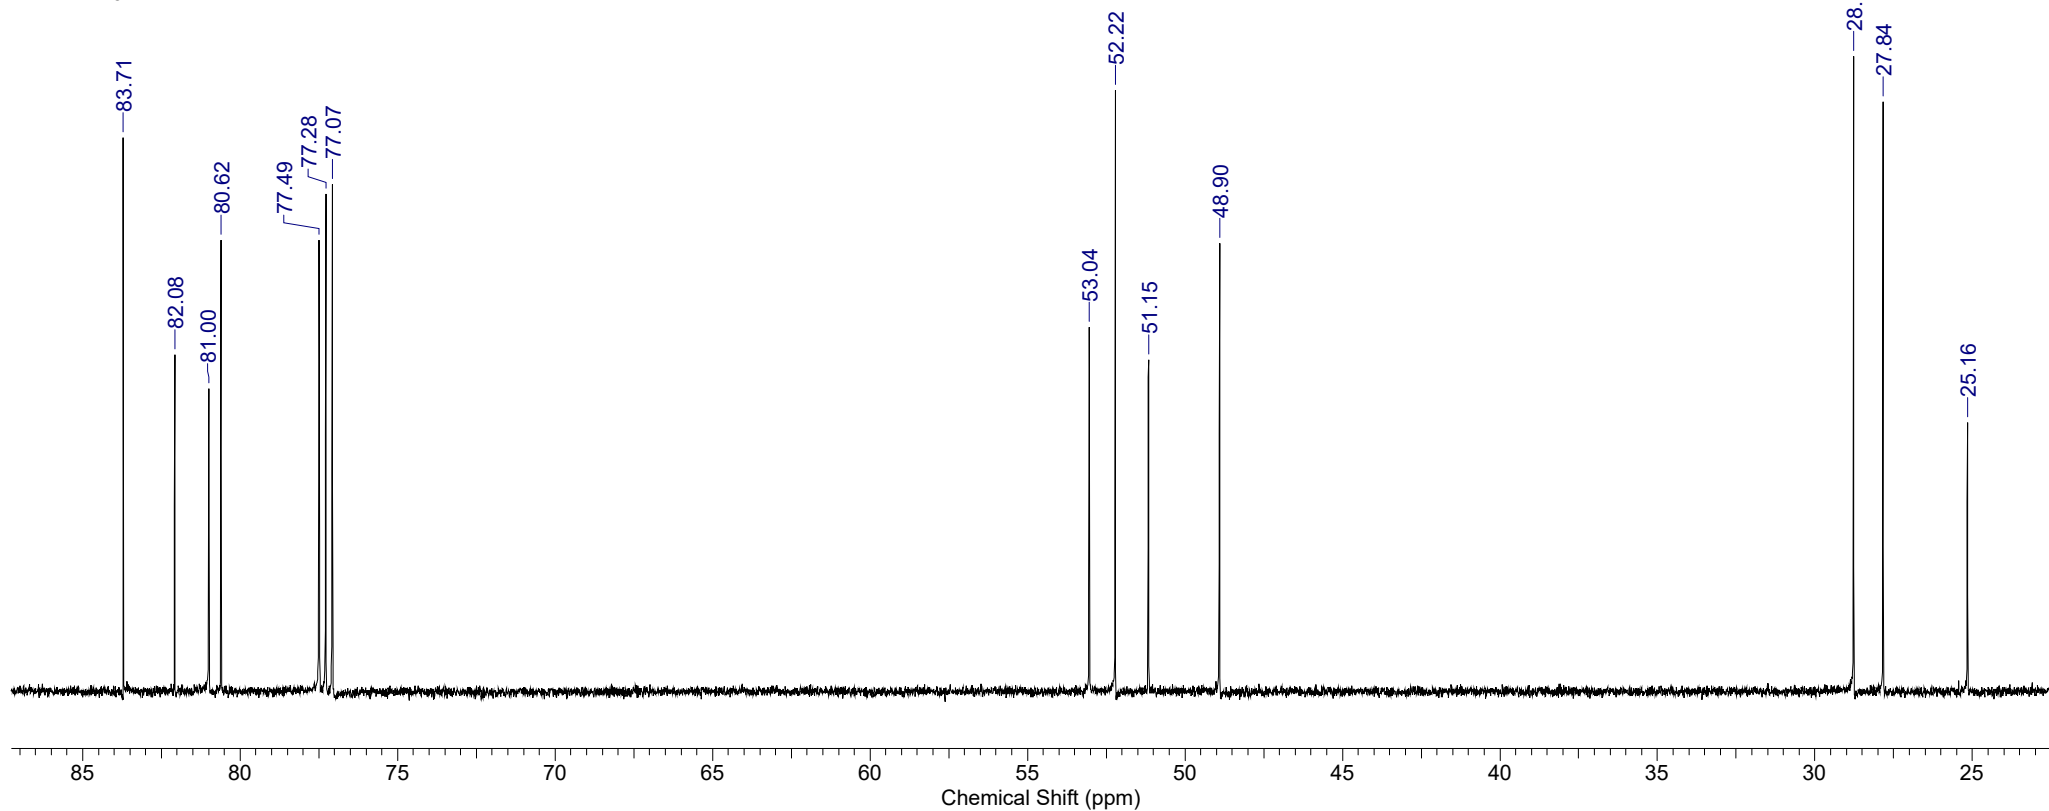

|                                                                  |                    |
|------------------------------------------------------------------|--------------------|
| <b>Formula</b> C <sub>15</sub> H <sub>15</sub> NO <sub>6</sub> S | <b>FW</b> 337.3477 |
|------------------------------------------------------------------|--------------------|

|                                                                 |                               |                                    |                                        |
|-----------------------------------------------------------------|-------------------------------|------------------------------------|----------------------------------------|
| <b>Acquisition Time (sec)</b> 1.9818                            | <b>Comment</b> single pulse   | <b>Date</b> 09 Jan 1990 17:39:27   | <b>Date Stamp</b> 12 Dec 2018 13:23:03 |
| <b>File Name</b> C:\USERS\534~1\APPDATA\LOCAL\TEMP\FZ7049-1.JDF | <b>Frequency (MHz)</b> 600.17 | <b>Nucleus</b> 1H                  |                                        |
| <b>Number of Transients</b> 8                                   | <b>Origin</b> ECA 600         | <b>Original Points Count</b> 32768 | <b>Owner</b> delta                     |
| <b>Pulse Sequence</b> single_pulse.ex2                          | <b>Receiver Gain</b> 44.00    | <b>Solvent</b> DMSO-d6             | <b>Points Count</b> 32768              |
| <b>Sweep Width (Hz)</b> 16534.39                                |                               |                                    | <b>Spectrum Offset (Hz)</b> 5423.7471  |

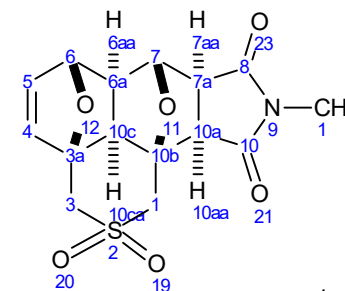

FZ7049-1.JDF

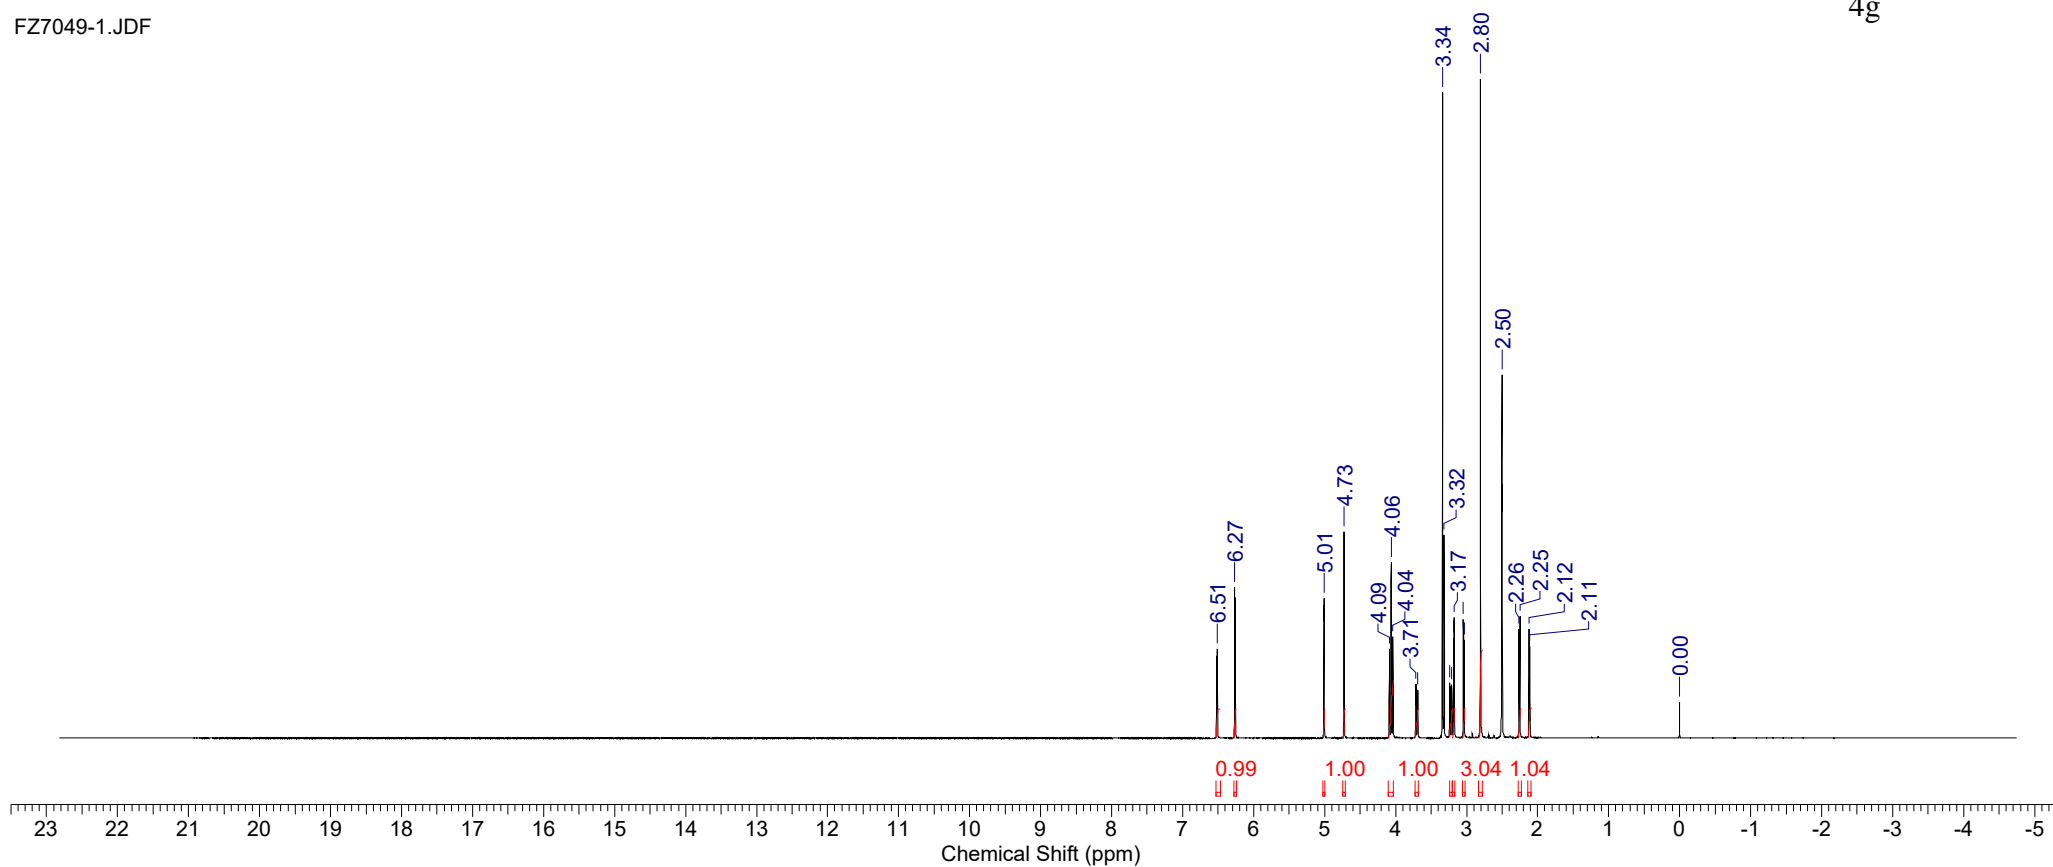

|                                                                  |                    |
|------------------------------------------------------------------|--------------------|
| <b>Formula</b> C <sub>15</sub> H <sub>15</sub> NO <sub>6</sub> S | <b>FW</b> 337.3477 |
|------------------------------------------------------------------|--------------------|

|                                                                 |                             |                                    |                                        |
|-----------------------------------------------------------------|-----------------------------|------------------------------------|----------------------------------------|
| <b>Acquisition Time (sec)</b> 1.9818                            | <b>Comment</b> single pulse | <b>Date</b> 09 Jan 1990 17:39:27   | <b>Date Stamp</b> 12 Dec 2018 13:23:03 |
| <b>File Name</b> C:\USERS\534~1\APPDATA\LOCAL\TEMP\FZ7049-1.JDF |                             | <b>Frequency (MHz)</b> 600.17      | <b>Nucleus</b> 1H                      |
| <b>Number of Transients</b> 8                                   | <b>Origin</b> ECA 600       | <b>Original Points Count</b> 32768 | <b>Points Count</b> 32768              |
| <b>Pulse Sequence</b> single_pulse.ex2                          |                             | <b>Receiver Gain</b> 44.00         | <b>Solvent</b> DMSO-d6                 |
| <b>Sweep Width (Hz)</b> 16534.39                                |                             |                                    | <b>Spectrum Offset (Hz)</b> 5423.7471  |

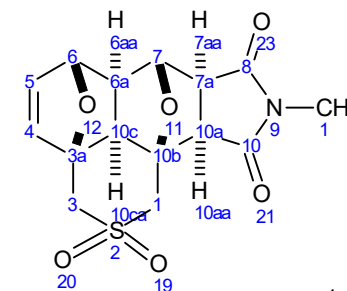

4g

FZ7049-1.JDF

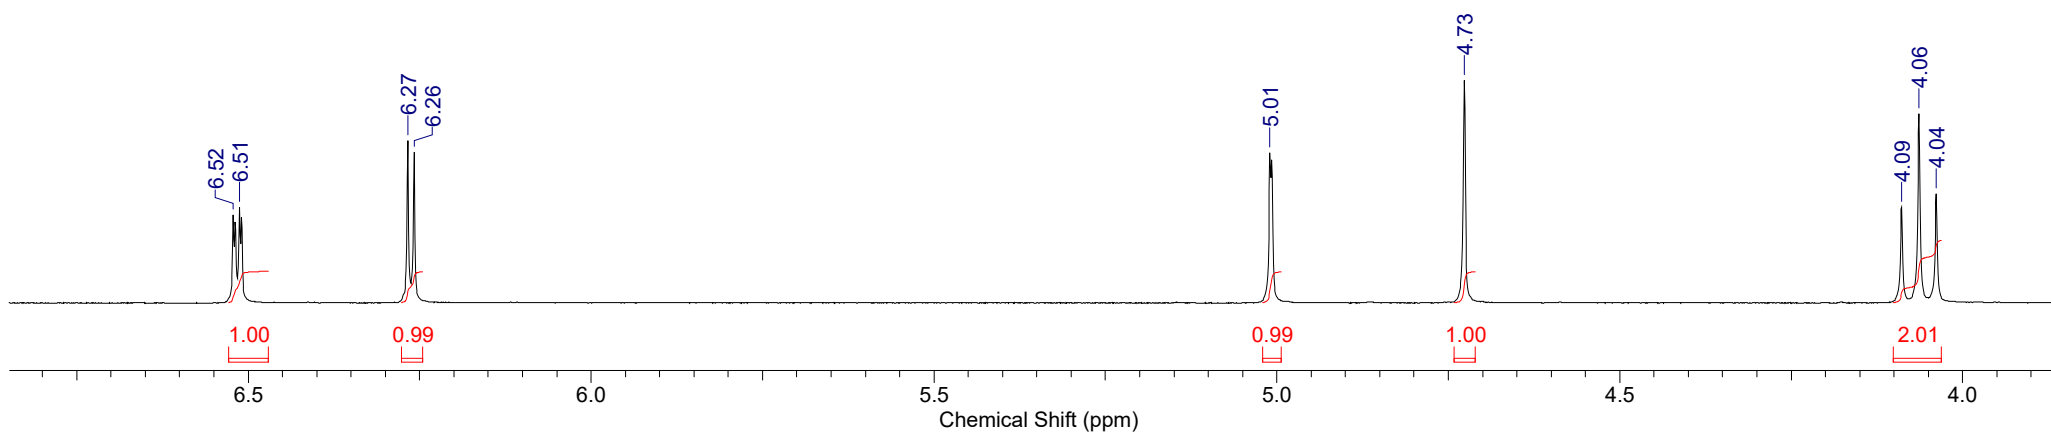

|                                                                  |                    |
|------------------------------------------------------------------|--------------------|
| <b>Formula</b> C <sub>15</sub> H <sub>15</sub> NO <sub>6</sub> S | <b>FW</b> 337.3477 |
|------------------------------------------------------------------|--------------------|

|                                                                 |                             |                                    |                                        |
|-----------------------------------------------------------------|-----------------------------|------------------------------------|----------------------------------------|
| <b>Acquisition Time (sec)</b> 1.9818                            | <b>Comment</b> single pulse | <b>Date</b> 09 Jan 1990 17:39:27   | <b>Date Stamp</b> 12 Dec 2018 13:23:03 |
| <b>File Name</b> C:\USERS\534~1\APPDATA\LOCAL\TEMP\FZ7049-1.JDF |                             | <b>Frequency (MHz)</b> 600.17      | <b>Nucleus</b> 1H                      |
| <b>Number of Transients</b> 8                                   | <b>Origin</b> ECA 600       | <b>Original Points Count</b> 32768 | <b>Points Count</b> 32768              |
| <b>Pulse Sequence</b> single_pulse.ex2                          |                             | <b>Receiver Gain</b> 44.00         | <b>Solvent</b> DMSO-d6                 |
| <b>Sweep Width (Hz)</b> 16534.39                                |                             |                                    | <b>Spectrum Offset (Hz)</b> 5423.7471  |

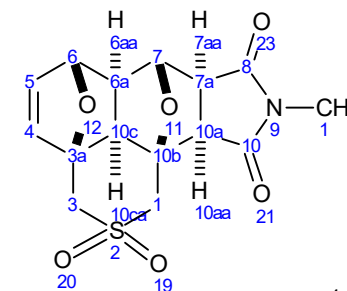

4g

FZ7049-1.JDF

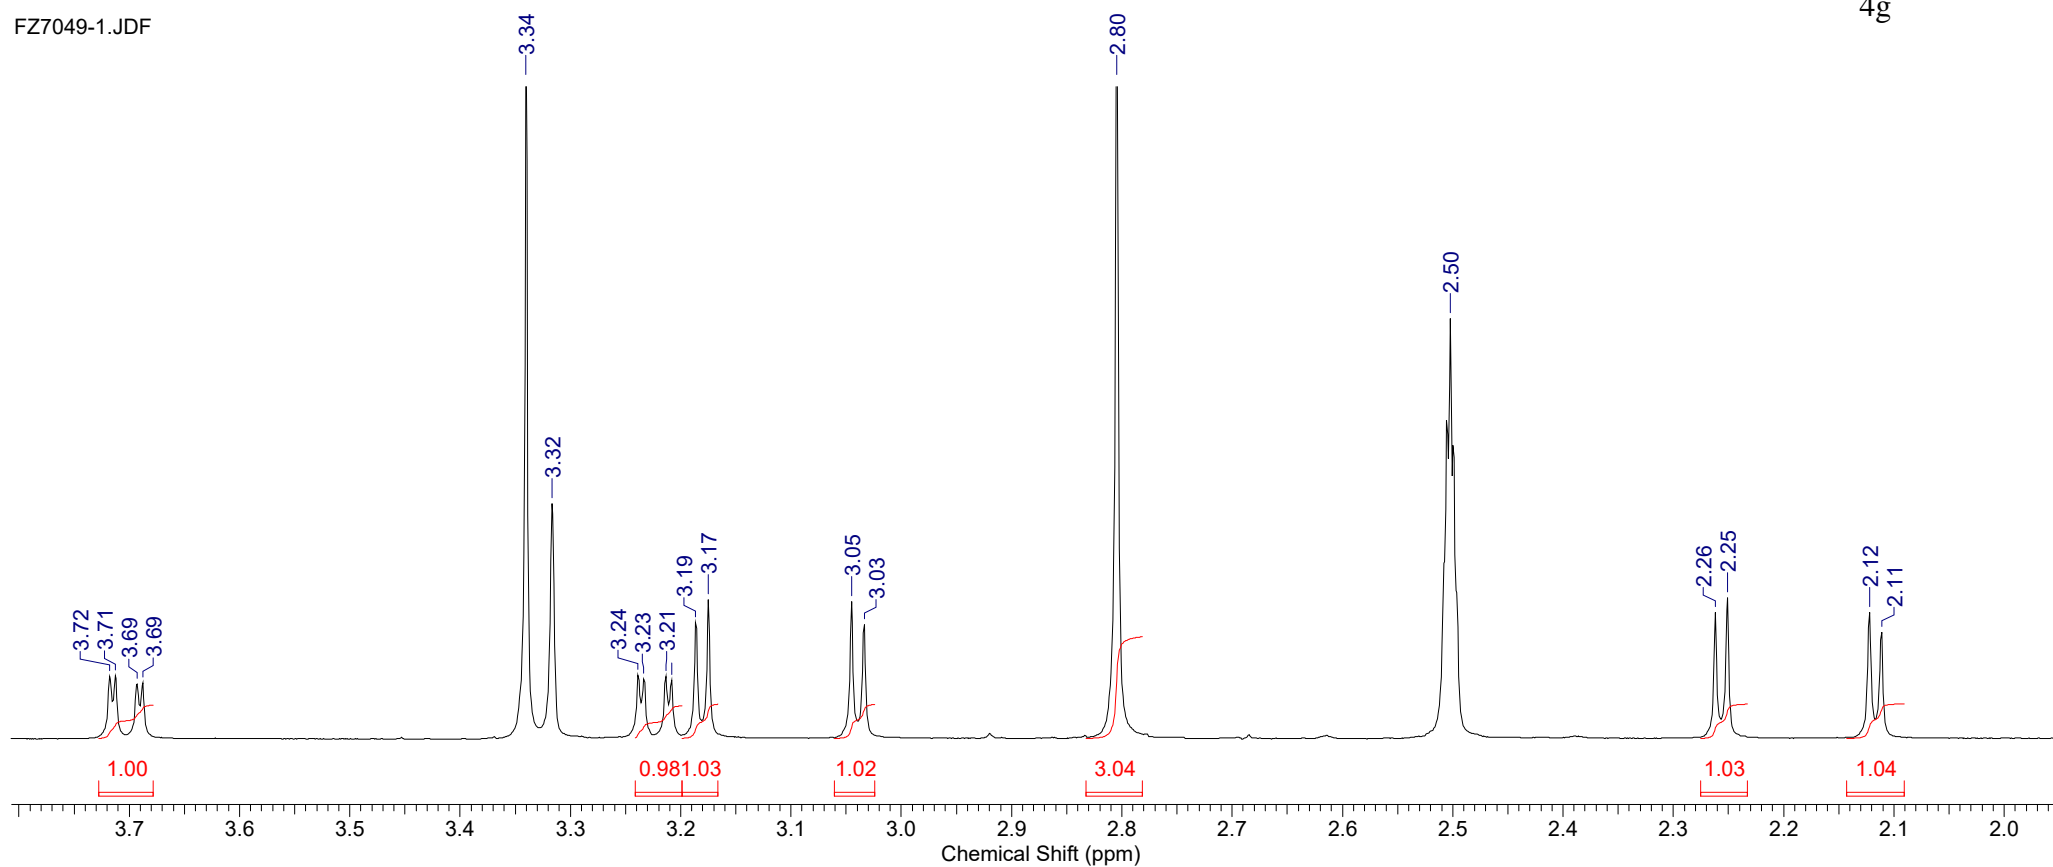



|                                                                  |                    |
|------------------------------------------------------------------|--------------------|
| <b>Formula</b> C <sub>15</sub> H <sub>15</sub> NO <sub>6</sub> S | <b>FW</b> 337.3477 |
|------------------------------------------------------------------|--------------------|

|                                        |                                                           |                                    |
|----------------------------------------|-----------------------------------------------------------|------------------------------------|
| <b>Acquisition Time (sec)</b> 0.6921   | <b>Comment</b> single pulse decoupled gated NOE           | <b>Date</b> 07 Aug 2020 14:02:26   |
| <b>Date Stamp</b> 07 Aug 2020 14:03:11 | <b>File Name</b> C:\USERS\Jla6a534\DOWNLOADS\FZ8964-1.JDF | <b>Frequency (MHz)</b> 150.91      |
| <b>Nucleus</b> 13C                     | <b>Number of Transients</b> 802                           | <b>Origin</b> ECA 600              |
| <b>Points Count</b> 32768              | <b>Pulse Sequence</b> single pulse dec                    | <b>Original Points Count</b> 32768 |
| <b>Spectrum Offset (Hz)</b> 15091.3428 | <b>Sweep Width (Hz)</b> 47348.49                          | <b>Receiver Gain</b> 58.00         |
|                                        |                                                           | <b>Solvent</b> DMSO-d6             |

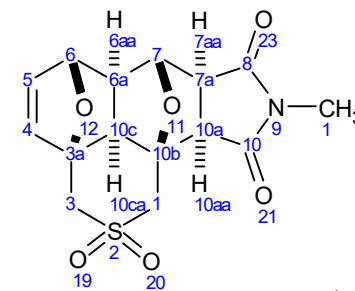

4g

FZ8964-1.JDF

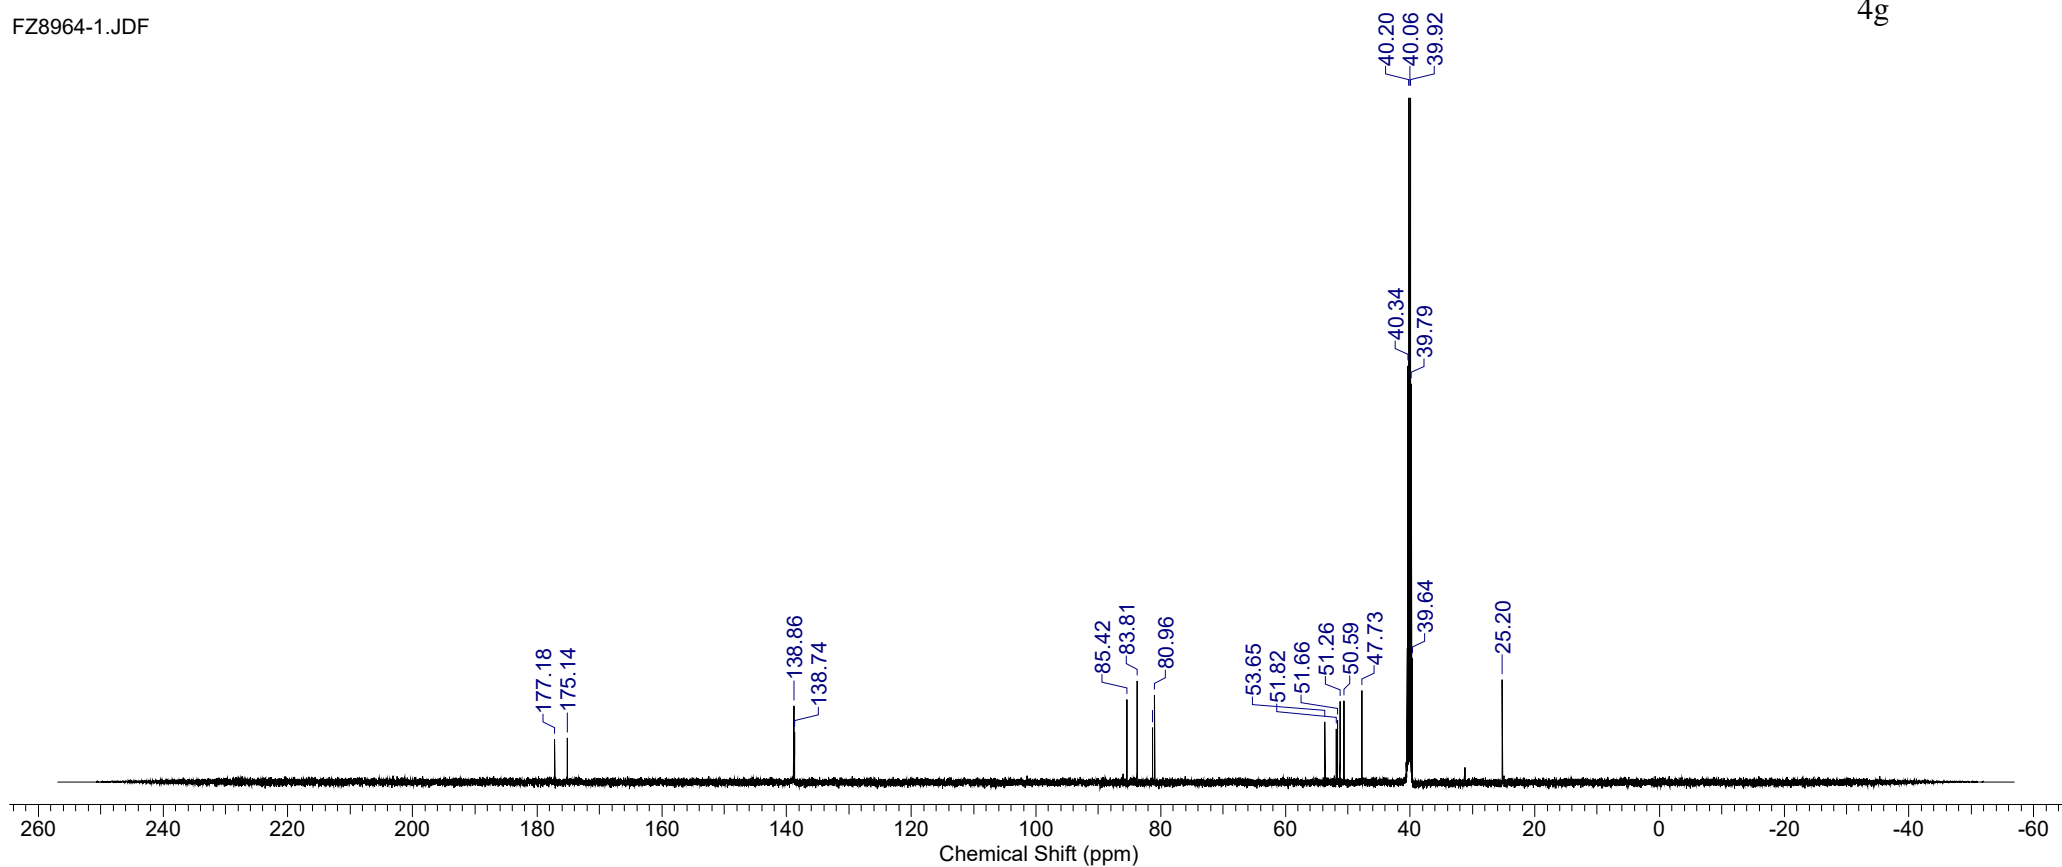

|                                                                  |                    |
|------------------------------------------------------------------|--------------------|
| <b>Formula</b> C <sub>15</sub> H <sub>15</sub> NO <sub>6</sub> S | <b>FW</b> 337.3477 |
|------------------------------------------------------------------|--------------------|

|                                        |                                                           |                                    |
|----------------------------------------|-----------------------------------------------------------|------------------------------------|
| <b>Acquisition Time (sec)</b> 0.6921   | <b>Comment</b> single pulse decoupled gated NOE           | <b>Date</b> 07 Aug 2020 14:02:26   |
| <b>Date Stamp</b> 07 Aug 2020 14:03:11 | <b>File Name</b> C:\USERS\Jla6a534\DOWNLOADS\FZ8964-1.JDF | <b>Frequency (MHz)</b> 150.91      |
| <b>Nucleus</b> 13C                     | <b>Number of Transients</b> 802                           | <b>Origin</b> ECA 600              |
| <b>Points Count</b> 32768              | <b>Pulse Sequence</b> single pulse dec                    | <b>Original Points Count</b> 32768 |
| <b>Spectrum Offset (Hz)</b> 15091.3428 | <b>Sweep Width (Hz)</b> 47348.49                          | <b>Receiver Gain</b> 58.00         |
|                                        |                                                           | <b>Solvent</b> DMSO-d6             |

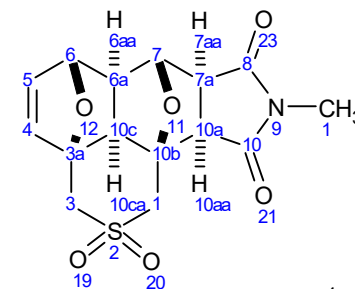

4g

FZ8964-1.JDF

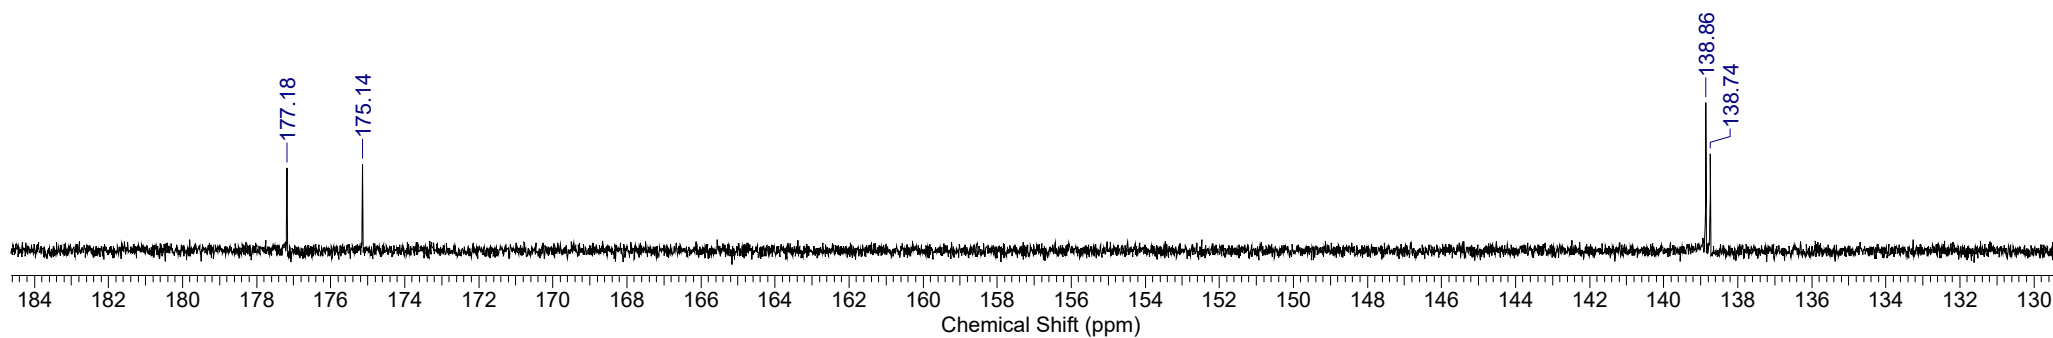

|                                                                  |                    |
|------------------------------------------------------------------|--------------------|
| <b>Formula</b> C <sub>15</sub> H <sub>15</sub> NO <sub>6</sub> S | <b>FW</b> 337.3477 |
|------------------------------------------------------------------|--------------------|

|                                        |                                                           |                                    |
|----------------------------------------|-----------------------------------------------------------|------------------------------------|
| <b>Acquisition Time (sec)</b> 0.6921   | <b>Comment</b> single pulse decoupled gated NOE           | <b>Date</b> 07 Aug 2020 14:02:26   |
| <b>Date Stamp</b> 07 Aug 2020 14:03:11 | <b>File Name</b> C:\USERS\lta6a534\DOWNLOADS\FZ8964-1.JDF | <b>Frequency (MHz)</b> 150.91      |
| <b>Nucleus</b> 13C                     | <b>Number of Transients</b> 802                           | <b>Origin</b> ECA 600              |
| <b>Points Count</b> 32768              | <b>Pulse Sequence</b> single pulse dec                    | <b>Original Points Count</b> 32768 |
| <b>Spectrum Offset (Hz)</b> 15091.3428 | <b>Sweep Width (Hz)</b> 47348.49                          | <b>Receiver Gain</b> 58.00         |
|                                        |                                                           | <b>Solvent</b> DMSO-d6             |

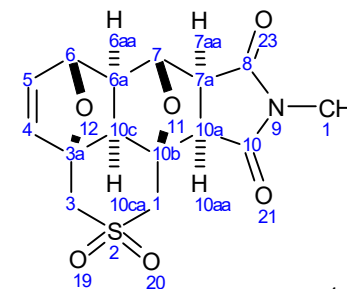

4g

FZ8964-1.JDF

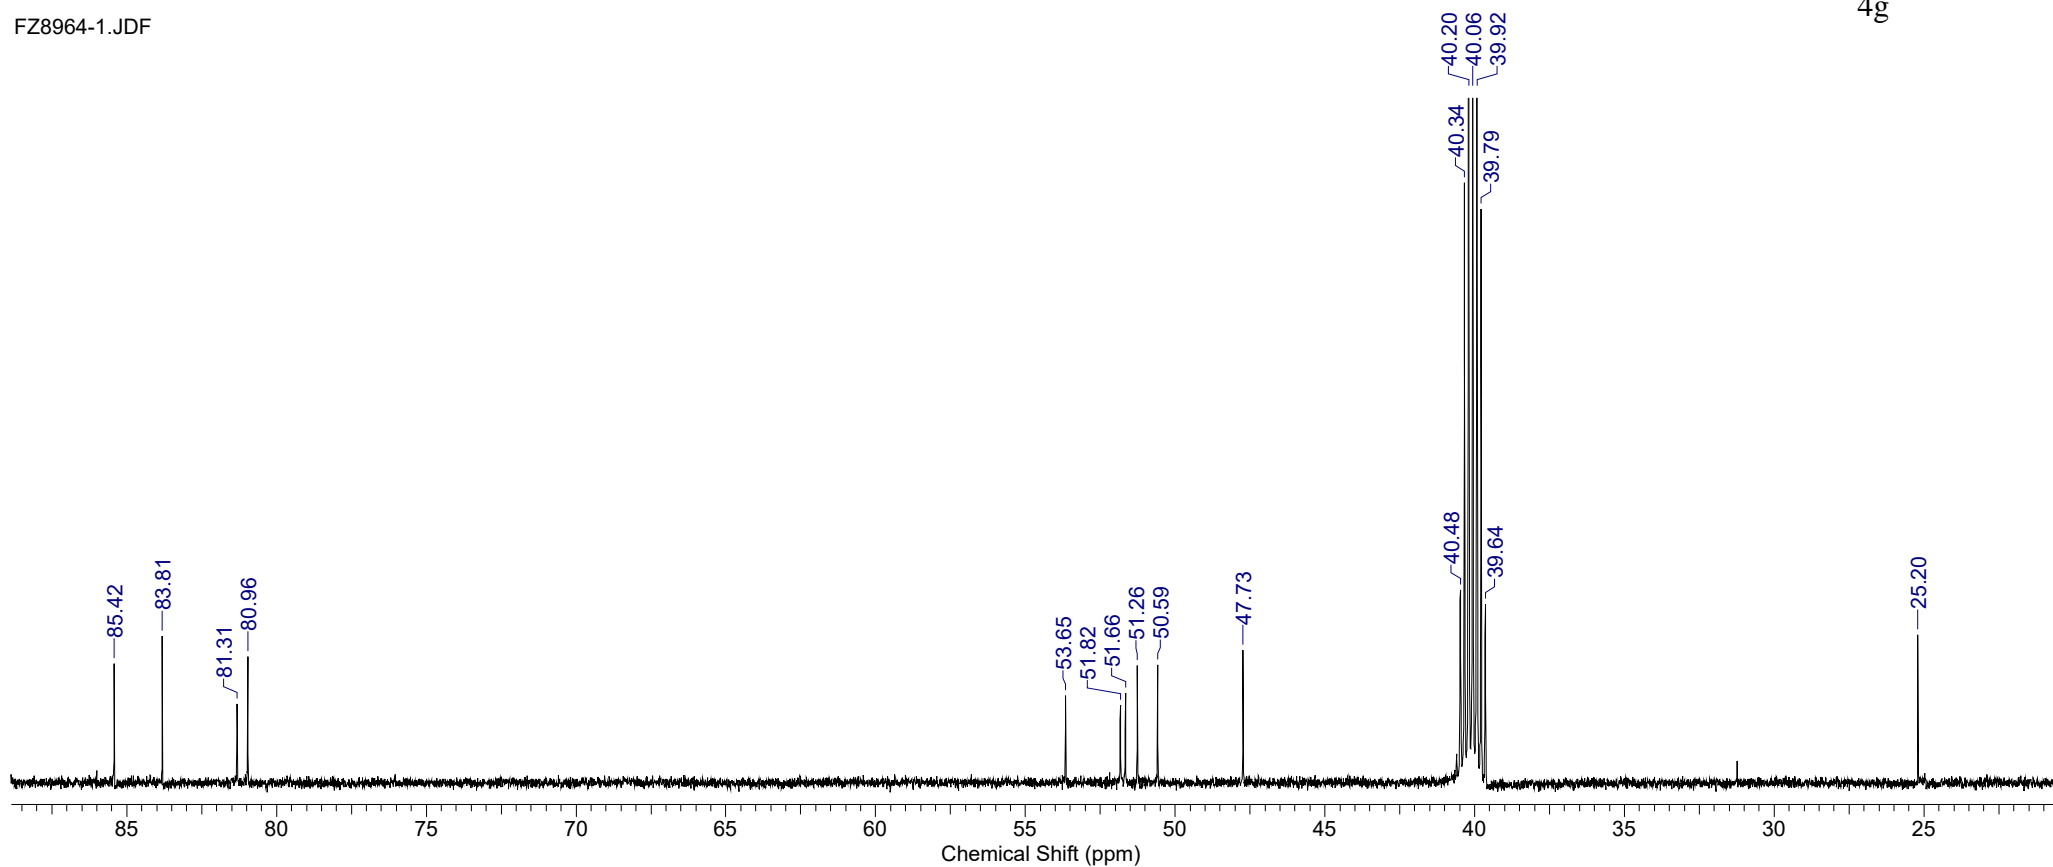

|                                                                              |                    |
|------------------------------------------------------------------------------|--------------------|
| <b>Formula</b> C <sub>18</sub> H <sub>20</sub> N <sub>2</sub> O <sub>5</sub> | <b>FW</b> 344.3618 |
|------------------------------------------------------------------------------|--------------------|

|                                                               |                                    |                                       |                                        |
|---------------------------------------------------------------|------------------------------------|---------------------------------------|----------------------------------------|
| <b>Acquisition Time (sec)</b> 1.9818                          | <b>Comment</b> single_pulse        | <b>Date</b> 09 Jan 1990 17:21:24      | <b>Date Stamp</b> 12 Dec 2018 13:05:00 |
| <b>File Name</b> C:\Users\Fedor\Desktop\11.12.18\FZ7051-1.jdf | <b>Frequency (MHz)</b> 600.17      | <b>Nucleus</b> 1H                     | <b>Number of Transients</b> 8          |
| <b>Origin</b> ECA 600                                         | <b>Original Points Count</b> 32768 | <b>Owner</b> delta                    | <b>Points Count</b> 32768              |
| <b>Receiver Gain</b> 40.00                                    | <b>Solvent</b> DMSO-d6             | <b>Spectrum Offset (Hz)</b> 5424.2515 | <b>Sweep Width (Hz)</b> 16534.39       |
|                                                               |                                    |                                       | <b>Pulse Sequence</b> single_pulse.ex2 |

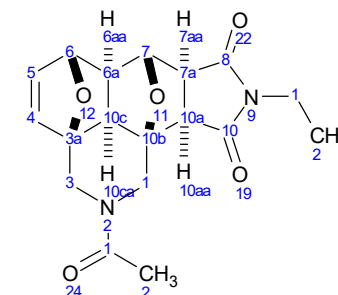

5a

FZ7051-1.ESP

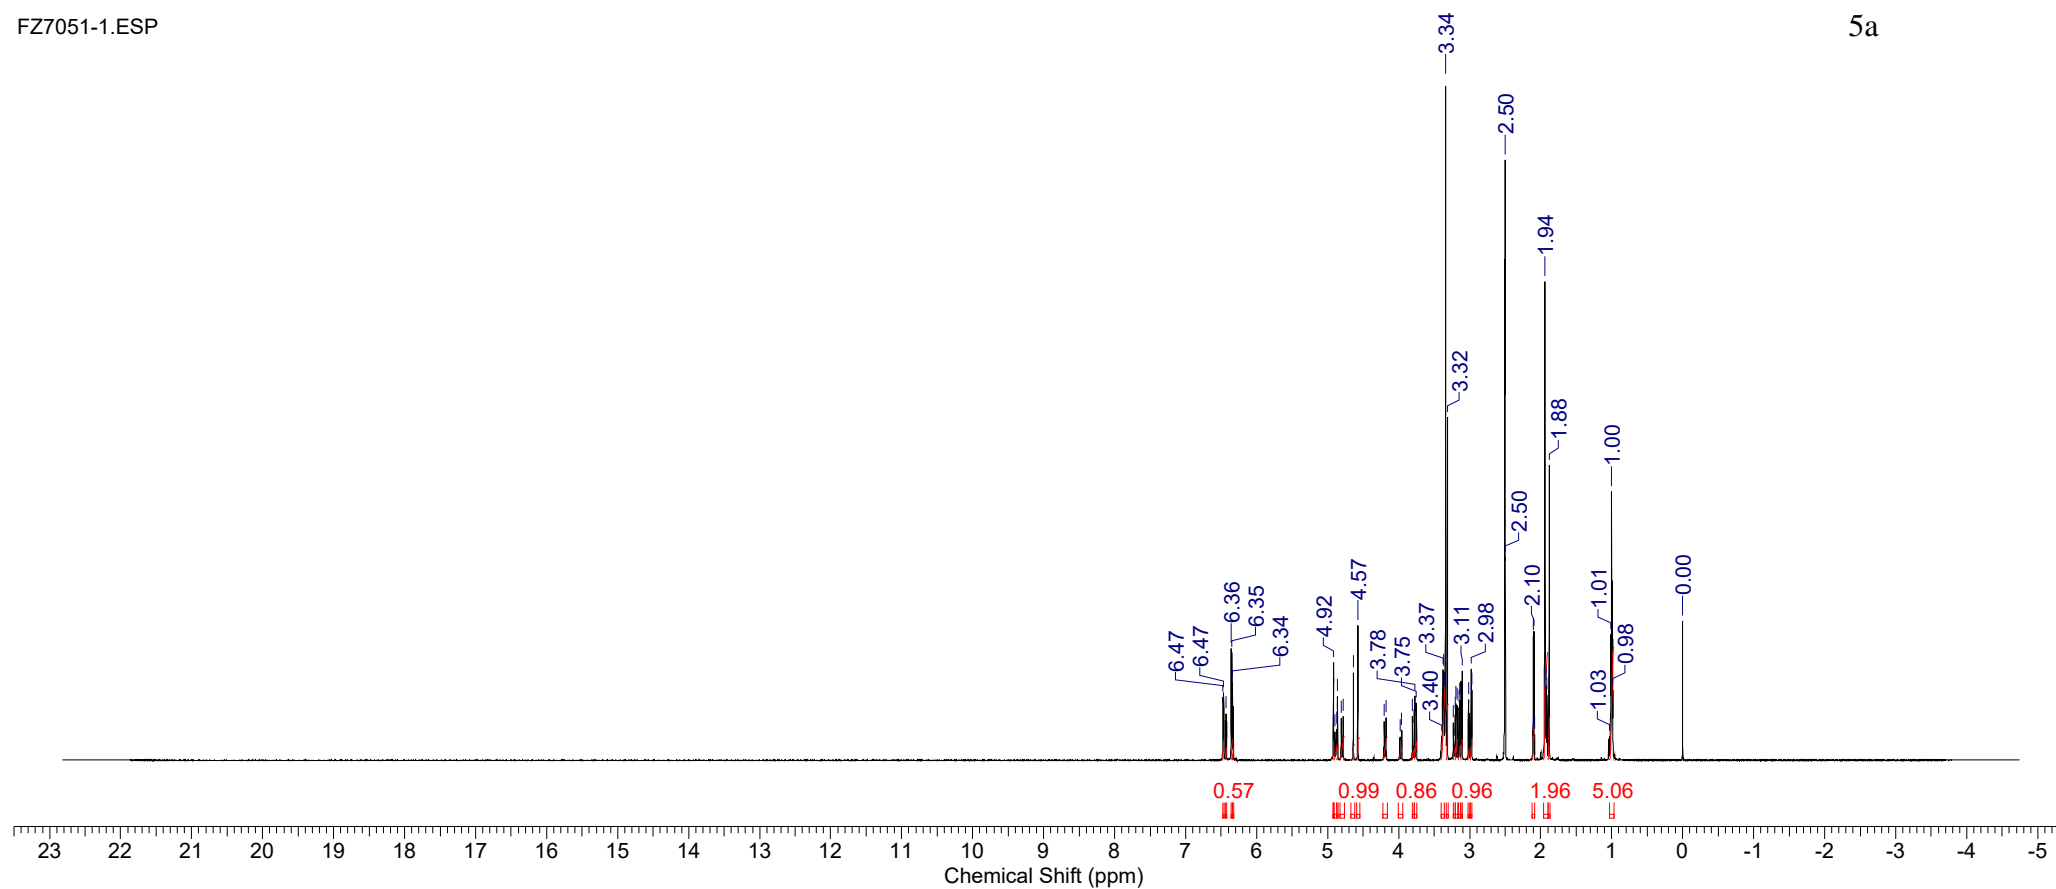

|                                                                              |                    |
|------------------------------------------------------------------------------|--------------------|
| <b>Formula</b> C <sub>18</sub> H <sub>20</sub> N <sub>2</sub> O <sub>5</sub> | <b>FW</b> 344.3618 |
|------------------------------------------------------------------------------|--------------------|

|                                                               |                                    |                                       |                                        |
|---------------------------------------------------------------|------------------------------------|---------------------------------------|----------------------------------------|
| <b>Acquisition Time (sec)</b> 1.9818                          | <b>Comment</b> single_pulse        | <b>Date</b> 09 Jan 1990 17:21:24      | <b>Date Stamp</b> 12 Dec 2018 13:05:00 |
| <b>File Name</b> C:\Users\Fedor\Desktop\11.12.18\FZ7051-1.jdf | <b>Frequency (MHz)</b> 600.17      | <b>Nucleus</b> 1H                     | <b>Number of Transients</b> 8          |
| <b>Origin</b> ECA 600                                         | <b>Original Points Count</b> 32768 | <b>Owner</b> delta                    | <b>Points Count</b> 32768              |
| <b>Receiver Gain</b> 40.00                                    | <b>Solvent</b> DMSO-d6             | <b>Spectrum Offset (Hz)</b> 5424.2515 | <b>Sweep Width (Hz)</b> 16534.39       |
|                                                               |                                    |                                       | <b>Pulse Sequence</b> single_pulse.ex2 |

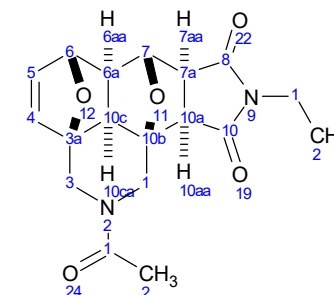

5a

FZ7051-1.ESP

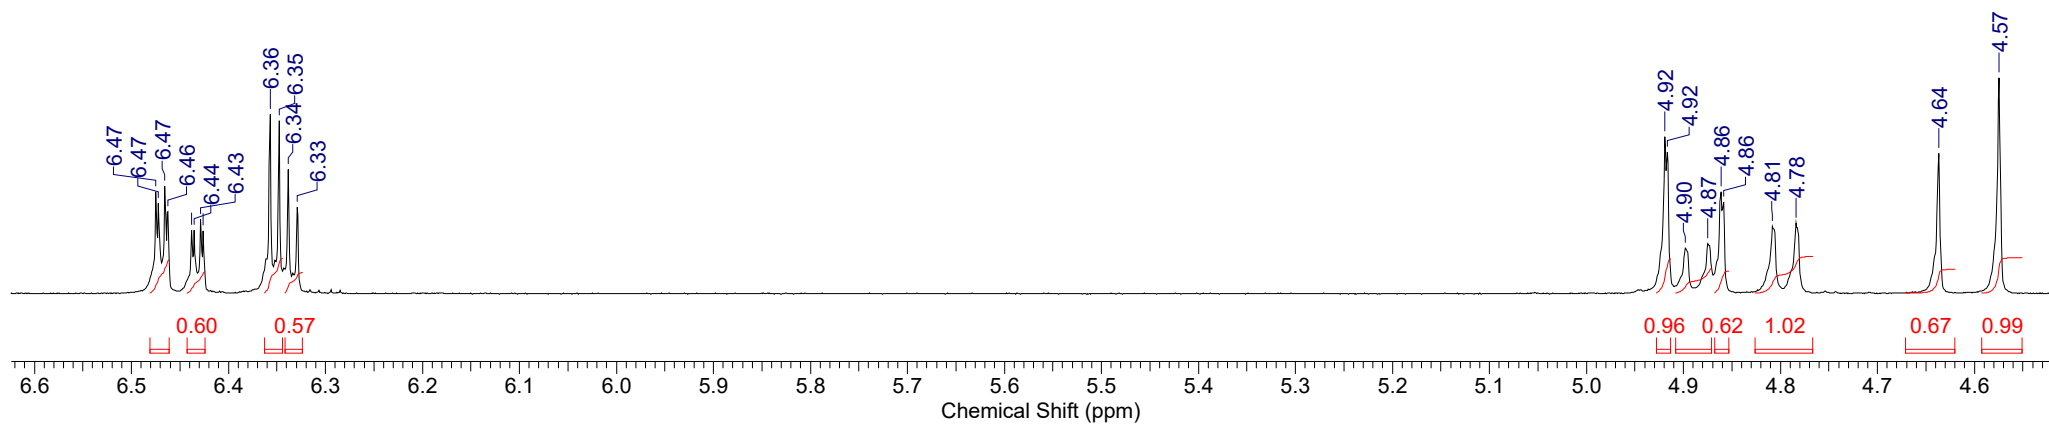

|                                                                              |                    |
|------------------------------------------------------------------------------|--------------------|
| <b>Formula</b> C <sub>18</sub> H <sub>20</sub> N <sub>2</sub> O <sub>5</sub> | <b>FW</b> 344.3618 |
|------------------------------------------------------------------------------|--------------------|

|                                                               |                                    |                                       |                                        |
|---------------------------------------------------------------|------------------------------------|---------------------------------------|----------------------------------------|
| <b>Acquisition Time (sec)</b> 1.9818                          | <b>Comment</b> single pulse        | <b>Date</b> 09 Jan 1990 17:21:24      | <b>Date Stamp</b> 12 Dec 2018 13:05:00 |
| <b>File Name</b> C:\Users\Fedor\Desktop\11.12.18\FZ7051-1.jdf | <b>Frequency (MHz)</b> 600.17      | <b>Nucleus</b> 1H                     | <b>Number of Transients</b> 8          |
| <b>Origin</b> ECA 600                                         | <b>Original Points Count</b> 32768 | <b>Owner</b> delta                    | <b>Points Count</b> 32768              |
| <b>Receiver Gain</b> 40.00                                    | <b>Solvent</b> DMSO-d6             | <b>Spectrum Offset (Hz)</b> 5424.2515 | <b>Sweep Width (Hz)</b> 16534.39       |

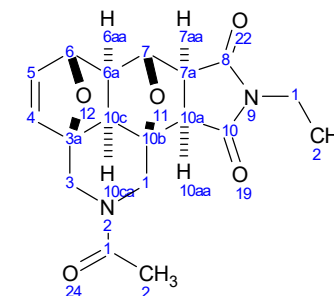

FZ7051-1.ESP

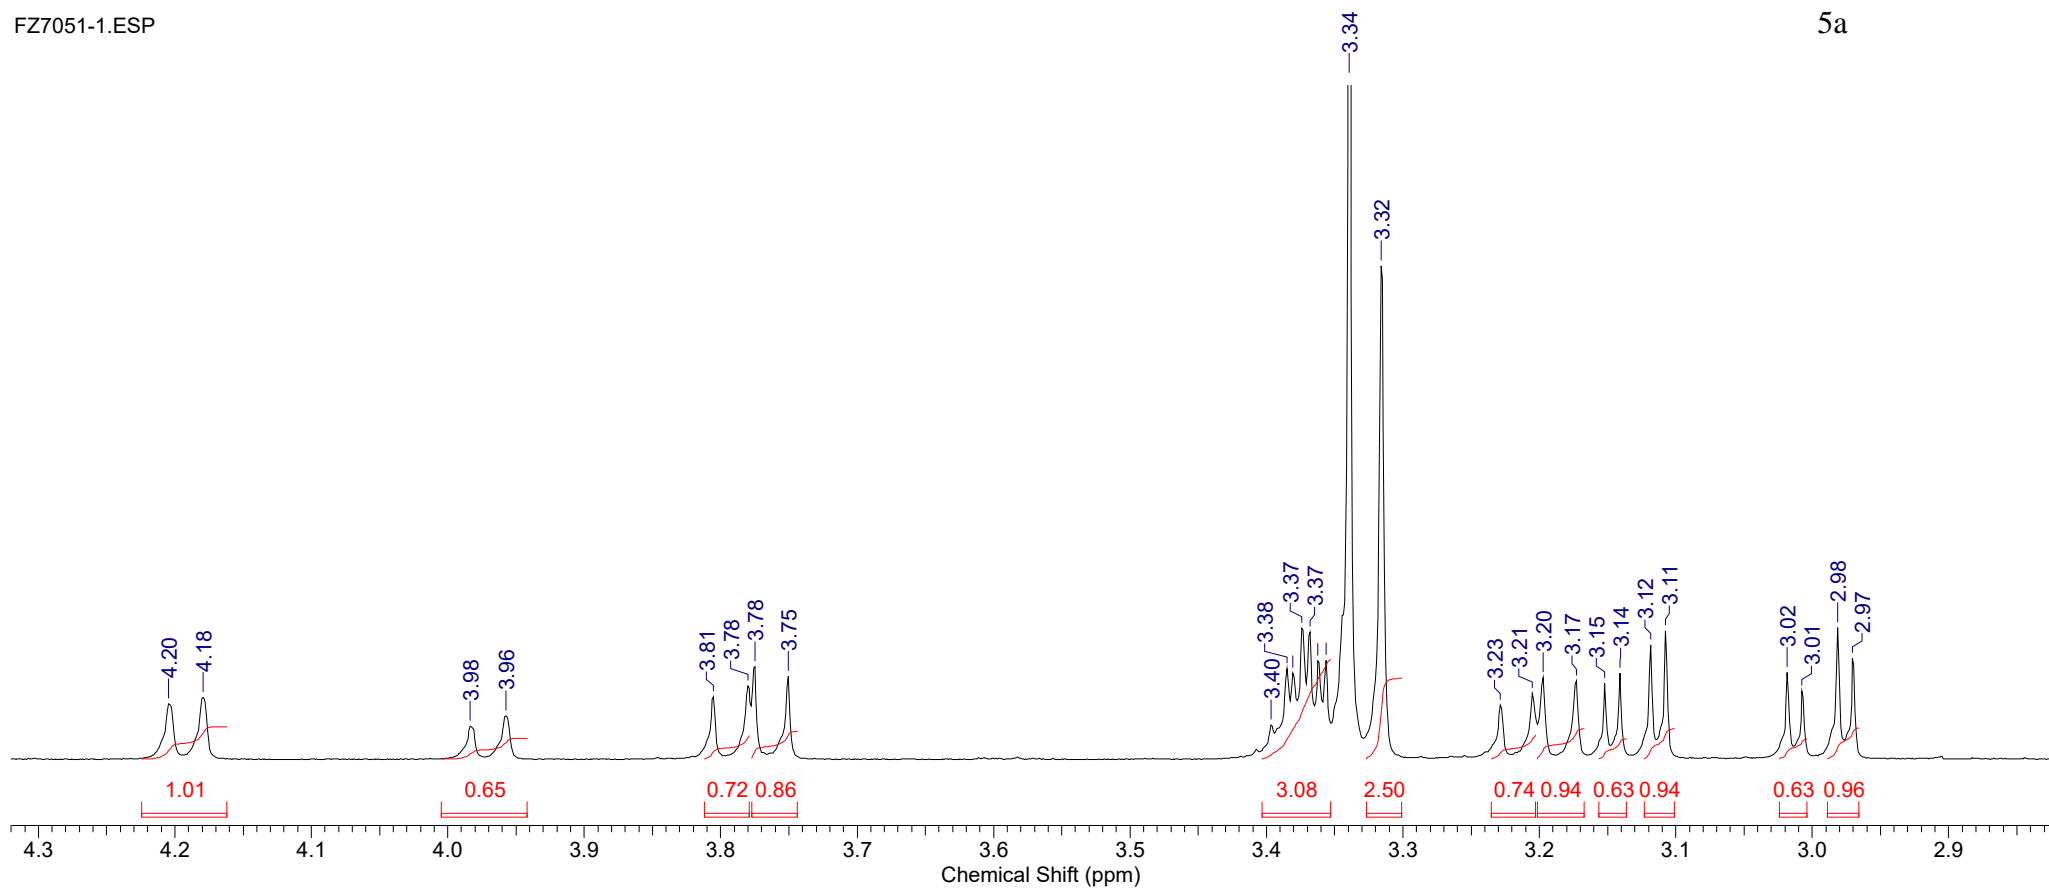

|                                                                              |                    |
|------------------------------------------------------------------------------|--------------------|
| <b>Formula</b> C <sub>18</sub> H <sub>20</sub> N <sub>2</sub> O <sub>5</sub> | <b>FW</b> 344.3618 |
|------------------------------------------------------------------------------|--------------------|

|                                                               |                                    |                                       |                                        |
|---------------------------------------------------------------|------------------------------------|---------------------------------------|----------------------------------------|
| <b>Acquisition Time (sec)</b> 1.9818                          | <b>Comment</b> single_pulse        | <b>Date</b> 09 Jan 1990 17:21:24      | <b>Date Stamp</b> 12 Dec 2018 13:05:00 |
| <b>File Name</b> C:\Users\Fedor\Desktop\11.12.18\FZ7051-1.jdf | <b>Frequency (MHz)</b> 600.17      | <b>Nucleus</b> 1H                     | <b>Number of Transients</b> 8          |
| <b>Origin</b> ECA 600                                         | <b>Original Points Count</b> 32768 | <b>Owner</b> delta                    | <b>Points Count</b> 32768              |
| <b>Receiver Gain</b> 40.00                                    | <b>Solvent</b> DMSO-d6             | <b>Spectrum Offset (Hz)</b> 5424.2515 | <b>Sweep Width (Hz)</b> 16534.39       |
|                                                               |                                    |                                       | <b>Pulse Sequence</b> single_pulse.ex2 |



5a

FZ7051-1.ESP

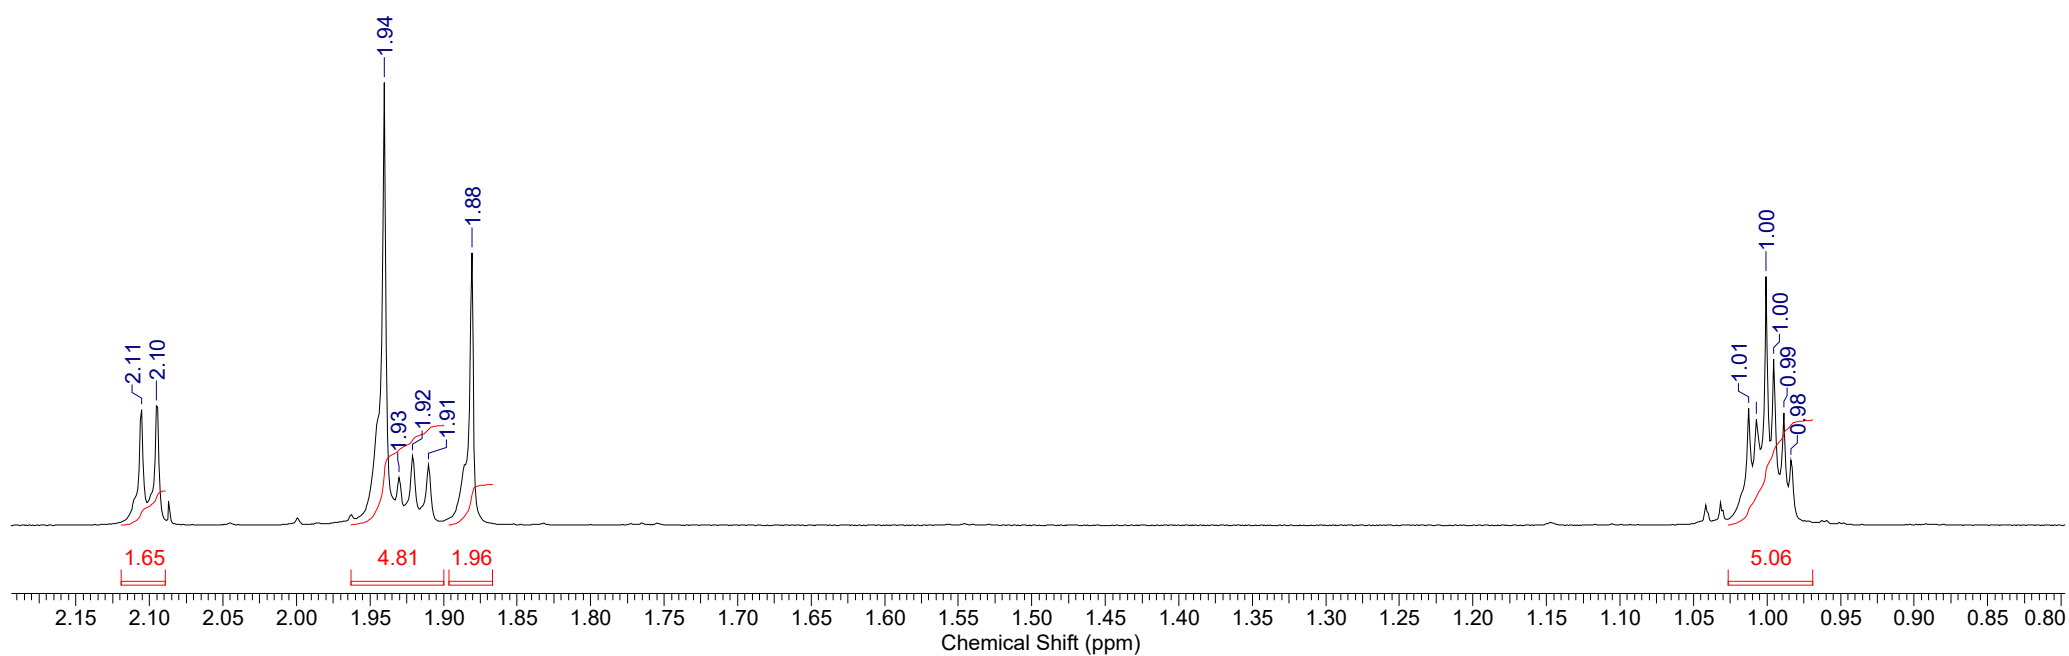

|                                                                              |                    |
|------------------------------------------------------------------------------|--------------------|
| <b>Formula</b> C <sub>18</sub> H <sub>20</sub> N <sub>2</sub> O <sub>5</sub> | <b>FW</b> 344.3618 |
|------------------------------------------------------------------------------|--------------------|

|                                        |                                                              |                                    |
|----------------------------------------|--------------------------------------------------------------|------------------------------------|
| <b>Acquisition Time (sec)</b> 0.6921   | <b>Comment</b> single pulse decoupled gated NOE              | <b>Date</b> 10 Aug 2020 09:41:00   |
| <b>Date Stamp</b> 10 Aug 2020 09:41:49 | <b>File Name</b> C:\USERS\Лабa534\DOWNLOADS\FZ8962-1 (1).JDF | <b>Frequency (MHz)</b> 150.91      |
| <b>Nucleus</b> 13C                     | <b>Number of Transients</b> 1001                             | <b>Origin</b> ECA 600              |
| <b>Points Count</b> 32768              | <b>Pulse Sequence</b> single pulse dec                       | <b>Original Points Count</b> 32768 |
| <b>Spectrum Offset (Hz)</b> 15091.3428 | <b>Sweep Width (Hz)</b> 47348.49                             | <b>Receiver Gain</b> 52.00         |
|                                        |                                                              | <b>Owner</b> CKP                   |
|                                        |                                                              | <b>Solvent</b> DMSO-d6             |

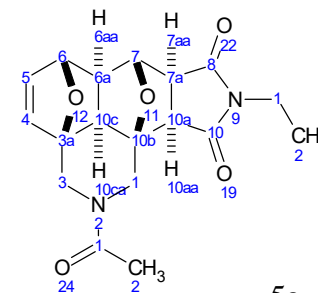

5a

FZ8962-1 (1).JDF

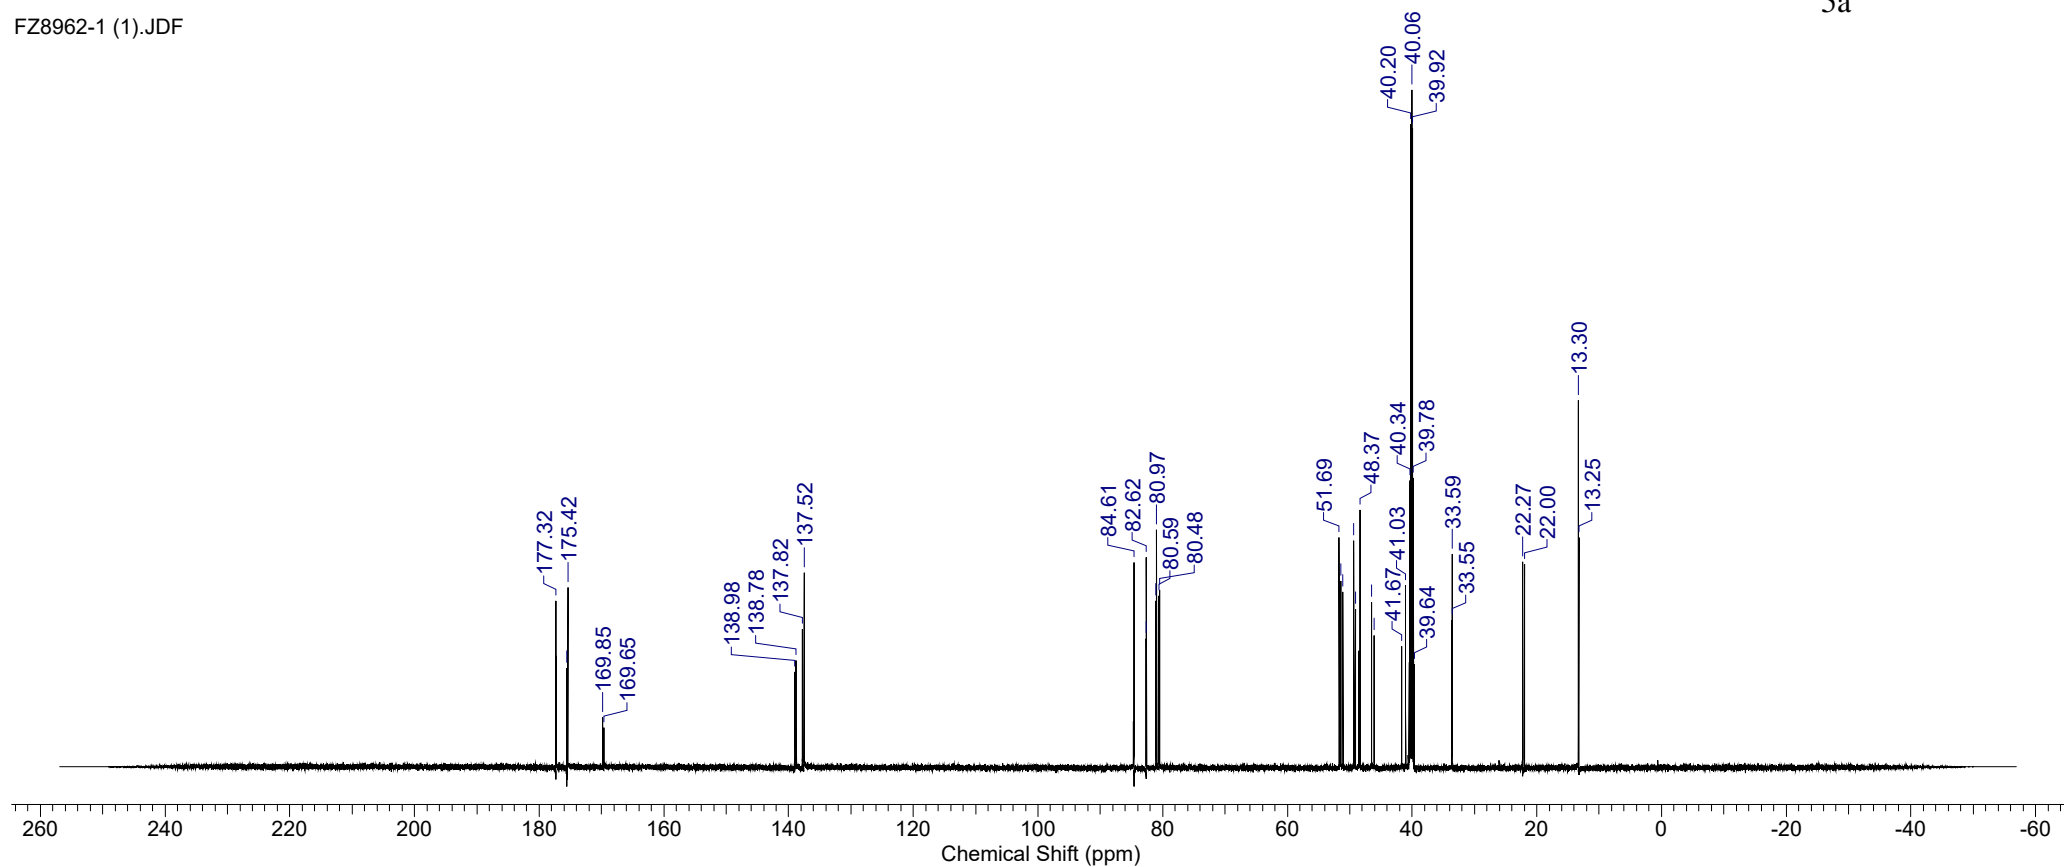



|                                                                              |                    |
|------------------------------------------------------------------------------|--------------------|
| <b>Formula</b> C <sub>18</sub> H <sub>20</sub> N <sub>2</sub> O <sub>5</sub> | <b>FW</b> 344.3618 |
|------------------------------------------------------------------------------|--------------------|

|                                        |                                                              |                                    |
|----------------------------------------|--------------------------------------------------------------|------------------------------------|
| <b>Acquisition Time (sec)</b> 0.6921   | <b>Comment</b> single pulse decoupled gated NOE              | <b>Date</b> 10 Aug 2020 09:41:00   |
| <b>Date Stamp</b> 10 Aug 2020 09:41:49 | <b>File Name</b> C:\USERS\Лабa534\DOWNLOADS\FZ8962-1 (1).JDF | <b>Frequency (MHz)</b> 150.91      |
| <b>Nucleus</b> 13C                     | <b>Number of Transients</b> 1001                             | <b>Origin</b> ECA 600              |
| <b>Points Count</b> 32768              | <b>Pulse Sequence</b> single pulse dec                       | <b>Original Points Count</b> 32768 |
| <b>Spectrum Offset (Hz)</b> 15091.3428 | <b>Sweep Width (Hz)</b> 47348.49                             | <b>Receiver Gain</b> 52.00         |
|                                        |                                                              | <b>Owner</b> CKP                   |
|                                        |                                                              | <b>Solvent</b> DMSO-d6             |

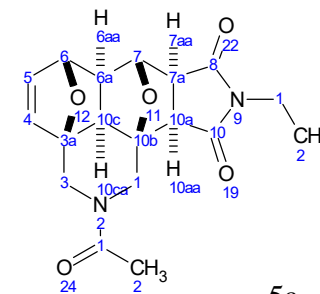

5a

FZ8962-1 (1).JDF

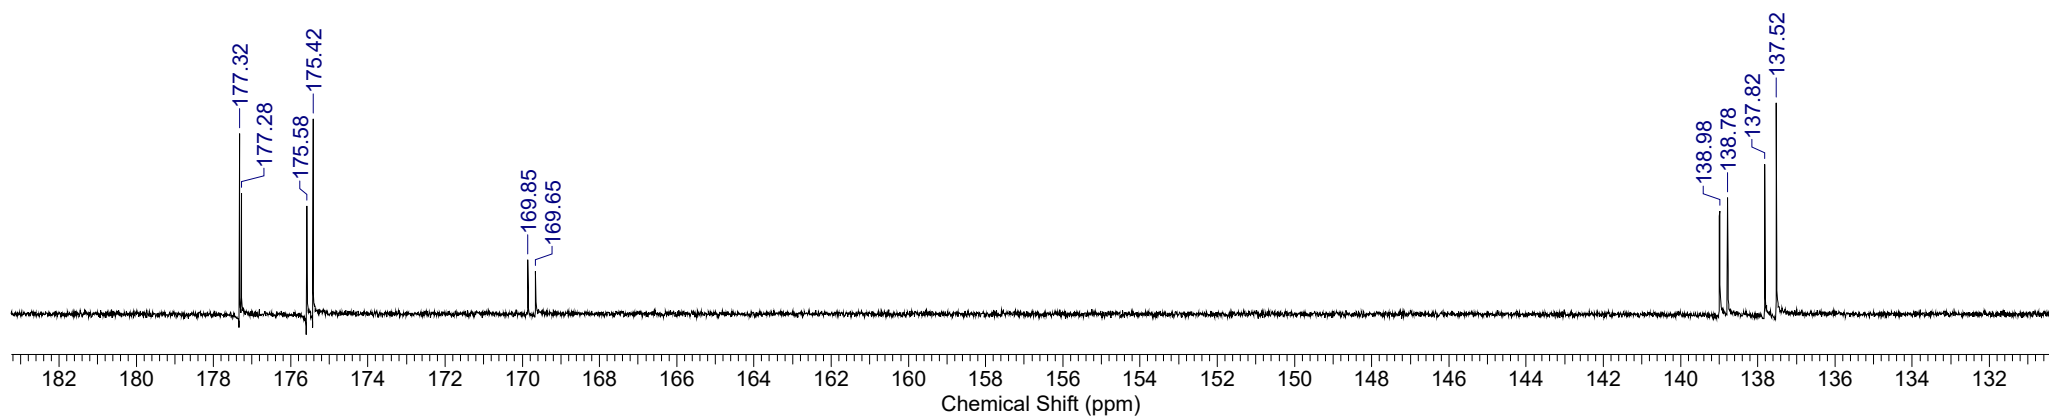

|                                                                              |                    |
|------------------------------------------------------------------------------|--------------------|
| <b>Formula</b> C <sub>18</sub> H <sub>20</sub> N <sub>2</sub> O <sub>5</sub> | <b>FW</b> 344.3618 |
|------------------------------------------------------------------------------|--------------------|

|                                        |                                                               |                                  |                                    |                  |
|----------------------------------------|---------------------------------------------------------------|----------------------------------|------------------------------------|------------------|
| <b>Acquisition Time (sec)</b> 0.6921   | <b>Comment</b> single pulse decoupled gated NOE               | <b>Date</b> 10 Aug 2020 09:41:00 |                                    |                  |
| <b>Date Stamp</b> 10 Aug 2020 09:41:49 | <b>File Name</b> C:\USERS\Лаб6а534\DOWNLOADS\FZ8962-1 (1).JDF | <b>Frequency (MHz)</b> 150.91    |                                    |                  |
| <b>Nucleus</b> 13C                     | <b>Number of Transients</b> 1001                              | <b>Origin</b> ECA 600            | <b>Original Points Count</b> 32768 | <b>Owner</b> CKP |
| <b>Points Count</b> 32768              | <b>Pulse Sequence</b> single pulse dec                        | <b>Receiver Gain</b> 52.00       | <b>Solvent</b> DMSO-d6             |                  |
| <b>Spectrum Offset (Hz)</b> 15091.3428 | <b>Sweep Width (Hz)</b> 47348.49                              |                                  |                                    |                  |

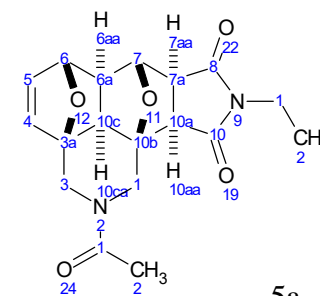

FZ8962-1 (1).JDF

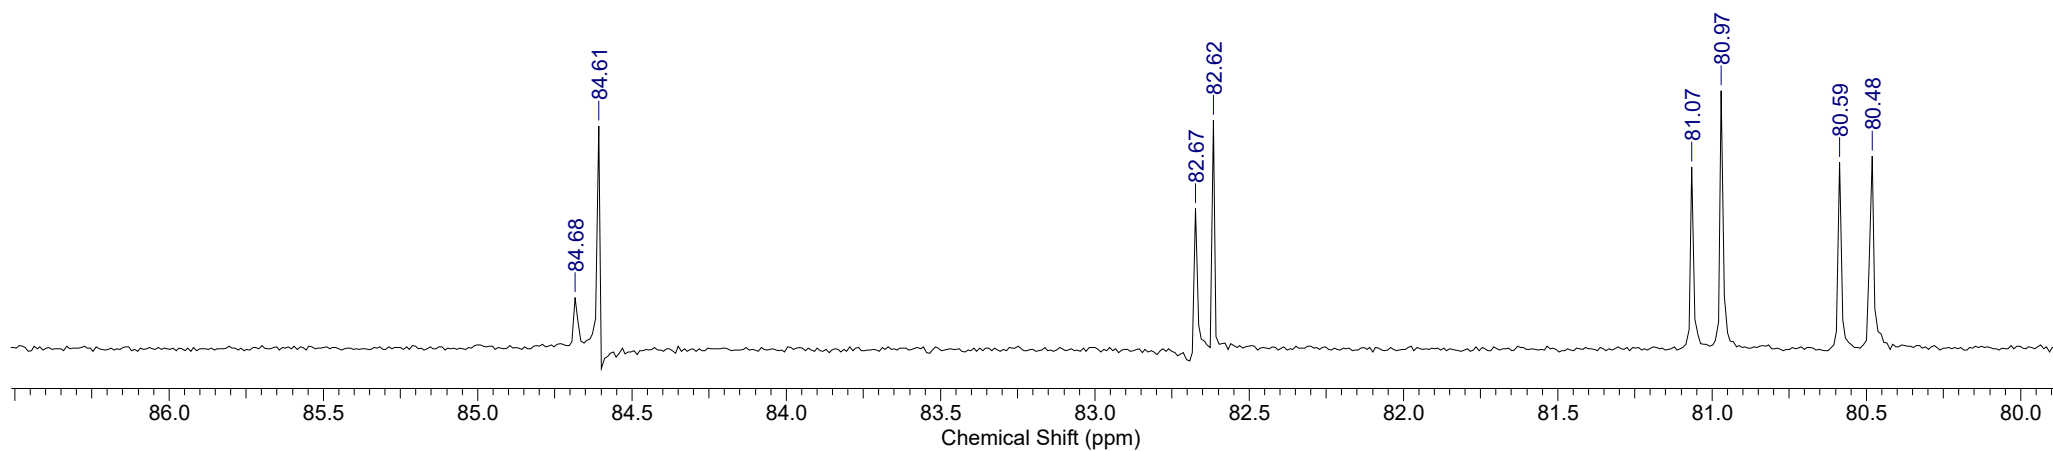

|                                                                              |                    |
|------------------------------------------------------------------------------|--------------------|
| <b>Formula</b> C <sub>18</sub> H <sub>20</sub> N <sub>2</sub> O <sub>5</sub> | <b>FW</b> 344.3618 |
|------------------------------------------------------------------------------|--------------------|

|                                        |                                                              |                                    |
|----------------------------------------|--------------------------------------------------------------|------------------------------------|
| <b>Acquisition Time (sec)</b> 0.6921   | <b>Comment</b> single pulse decoupled gated NOE              | <b>Date</b> 10 Aug 2020 09:41:00   |
| <b>Date Stamp</b> 10 Aug 2020 09:41:49 | <b>File Name</b> C:\USERS\Лабa534\DOWNLOADS\FZ8962-1 (1).JDF | <b>Frequency (MHz)</b> 150.91      |
| <b>Nucleus</b> 13C                     | <b>Number of Transients</b> 1001                             | <b>Origin</b> ECA 600              |
| <b>Points Count</b> 32768              | <b>Pulse Sequence</b> single pulse dec                       | <b>Original Points Count</b> 32768 |
| <b>Spectrum Offset (Hz)</b> 15091.3428 | <b>Sweep Width (Hz)</b> 47348.49                             | <b>Receiver Gain</b> 52.00         |
|                                        |                                                              | <b>Owner</b> CKP                   |
|                                        |                                                              | <b>Solvent</b> DMSO-d6             |

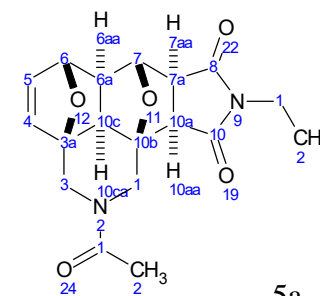

5a

FZ8962-1 (1).JDF

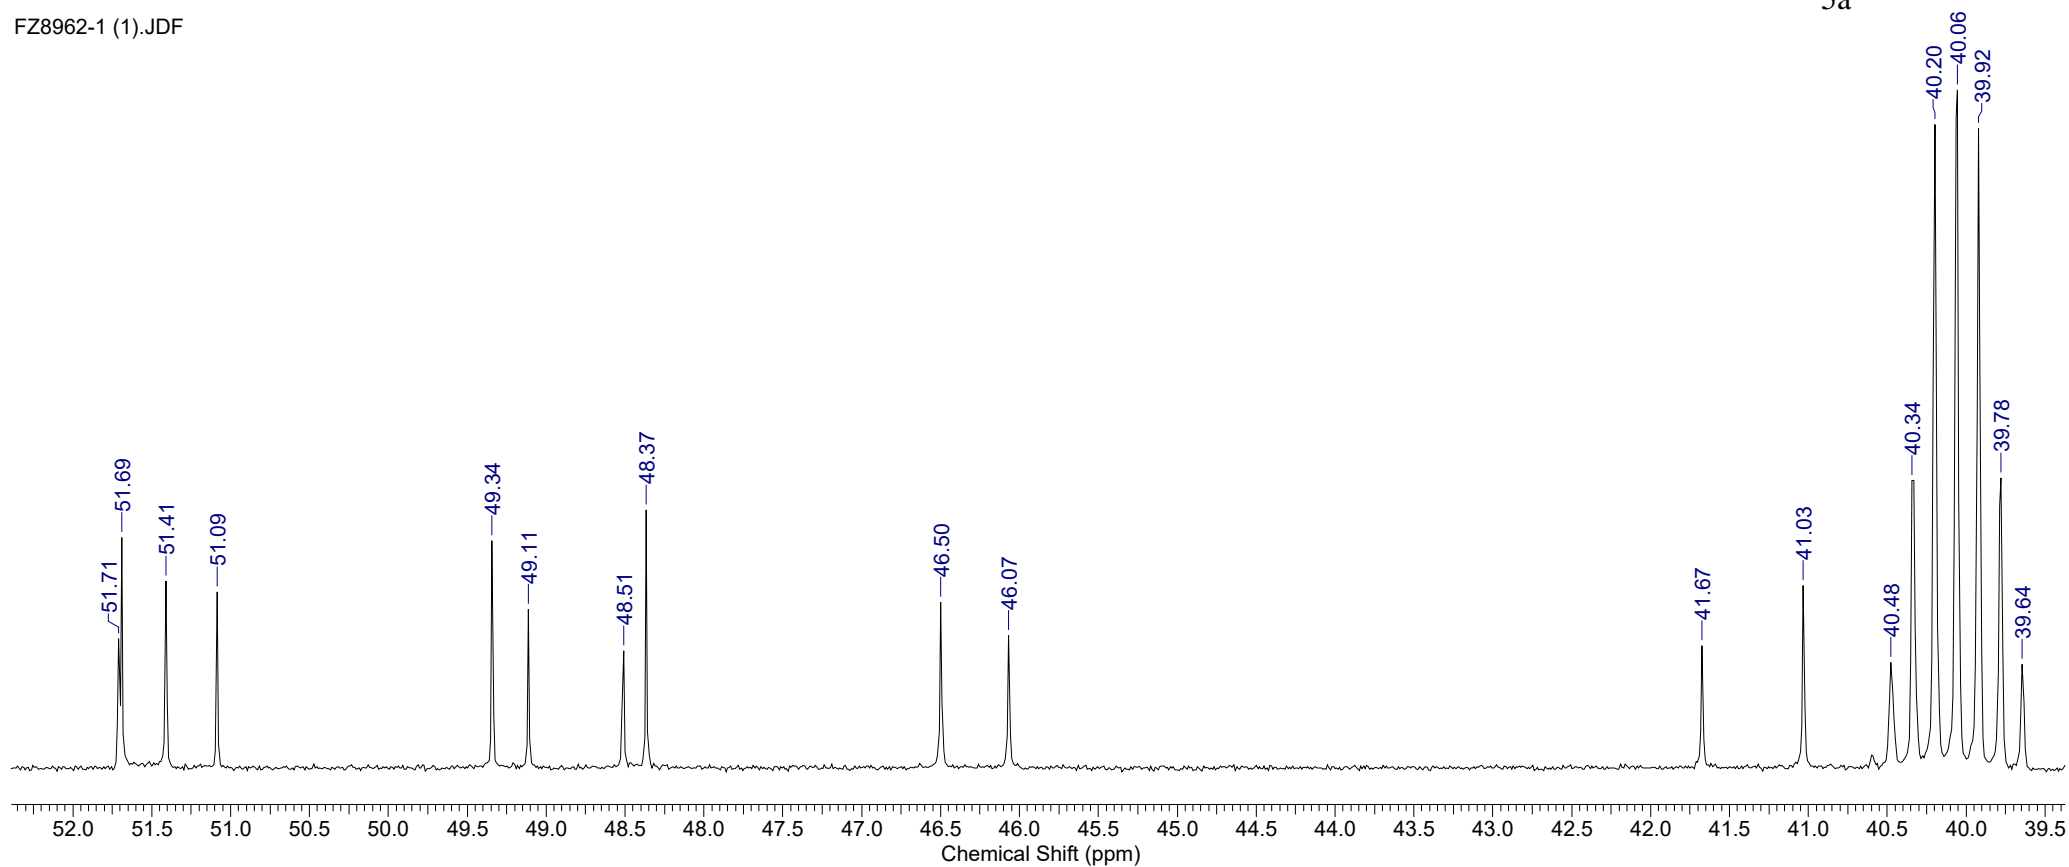

|                                                                              |                    |
|------------------------------------------------------------------------------|--------------------|
| <b>Formula</b> C <sub>18</sub> H <sub>20</sub> N <sub>2</sub> O <sub>5</sub> | <b>FW</b> 344.3618 |
|------------------------------------------------------------------------------|--------------------|

|                                        |                                                              |                                    |
|----------------------------------------|--------------------------------------------------------------|------------------------------------|
| <b>Acquisition Time (sec)</b> 0.6921   | <b>Comment</b> single pulse decoupled gated NOE              | <b>Date</b> 10 Aug 2020 09:41:00   |
| <b>Date Stamp</b> 10 Aug 2020 09:41:49 | <b>File Name</b> C:\USERS\Лабa534\DOWNLOADS\FZ8962-1 (1).JDF | <b>Frequency (MHz)</b> 150.91      |
| <b>Nucleus</b> 13C                     | <b>Number of Transients</b> 1001                             | <b>Origin</b> ECA 600              |
| <b>Points Count</b> 32768              | <b>Pulse Sequence</b> single pulse dec                       | <b>Original Points Count</b> 32768 |
| <b>Spectrum Offset (Hz)</b> 15091.3428 | <b>Sweep Width (Hz)</b> 47348.49                             | <b>Receiver Gain</b> 52.00         |
|                                        |                                                              | <b>Owner</b> CKP                   |
|                                        |                                                              | <b>Solvent</b> DMSO-d6             |

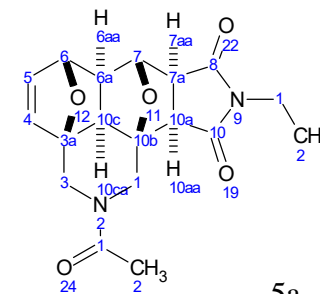

FZ8962-1 (1).JDF

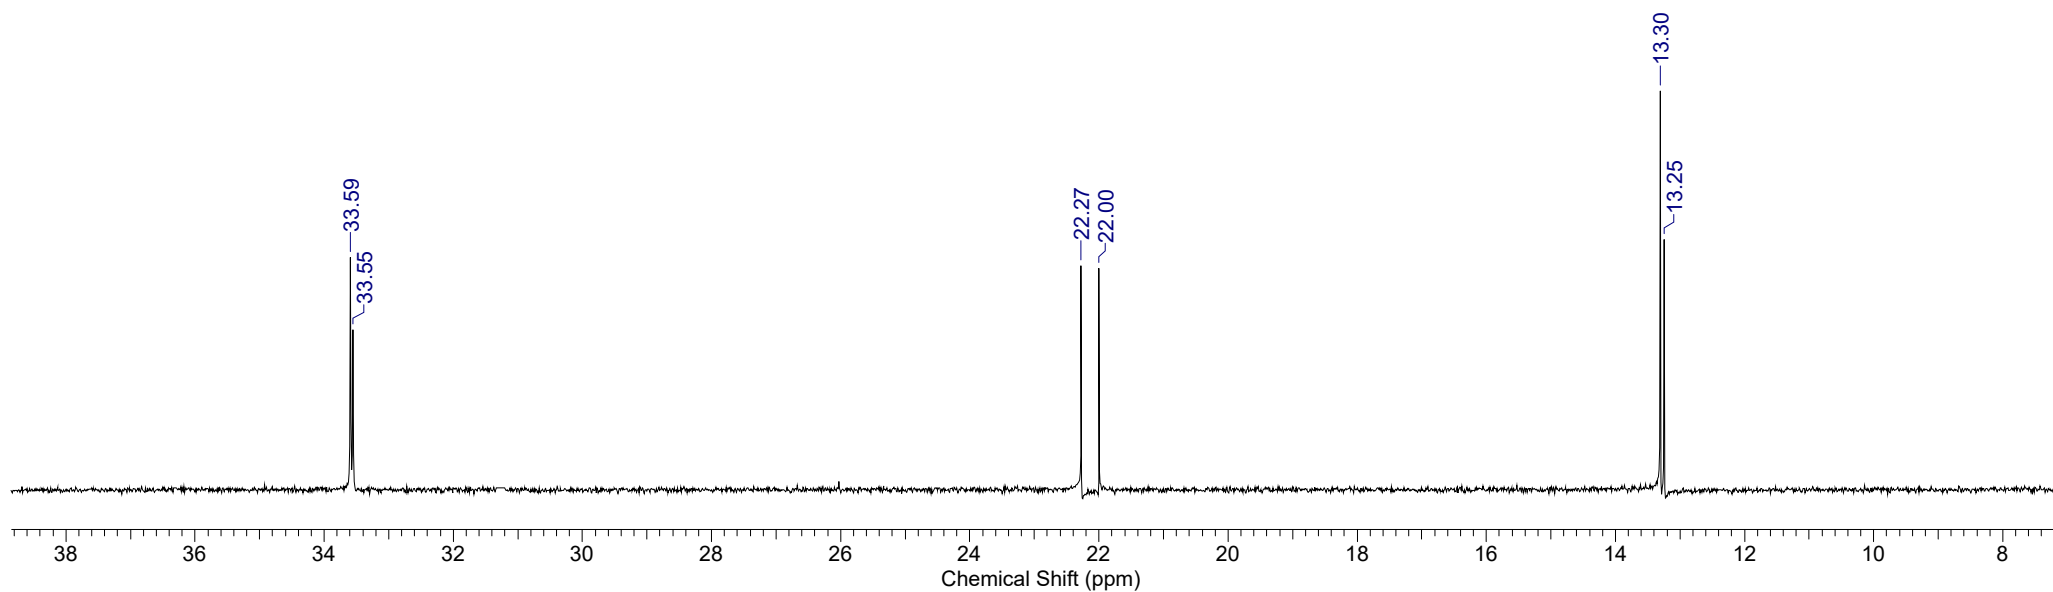

|                                                                                             |                    |
|---------------------------------------------------------------------------------------------|--------------------|
| <b>Formula</b> C <sub>18</sub> H <sub>17</sub> F <sub>3</sub> N <sub>2</sub> O <sub>5</sub> | <b>FW</b> 398.3332 |
|---------------------------------------------------------------------------------------------|--------------------|

|                                                          |                                    |                                        |                                        |
|----------------------------------------------------------|------------------------------------|----------------------------------------|----------------------------------------|
| <b>Acquisition Time (sec)</b> 1.9818                     | <b>Comment</b> single_pulse        | <b>Date</b> 21 Aug 2020 12:25:09       | <b>Date Stamp</b> 21 Aug 2020 12:26:17 |
| <b>File Name</b> C:\USERS\Лабa534\DOWNLOADS\FZ9031-2.JDF | <b>Frequency (MHz)</b> 600.17      | <b>Nucleus</b> 1H                      | <b>Number of Transients</b> 8          |
| <b>Origin</b> ECA 600                                    | <b>Original Points Count</b> 32768 | <b>Owner</b> CKP                       | <b>Points Count</b> 32768              |
| <b>Receiver Gain</b> 36.00                               | <b>Solvent</b> DMSO-d6             | <b>Spectrum Offset (Hz)</b> 5424.2515  | <b>Sweep Width (Hz)</b> 16534.39       |
|                                                          |                                    | <b>Pulse Sequence</b> single_pulse.ex2 |                                        |

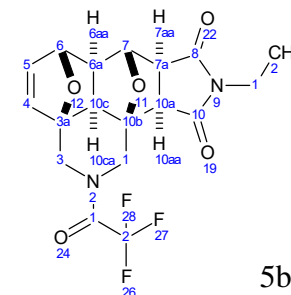

FZ9031-2.JDF

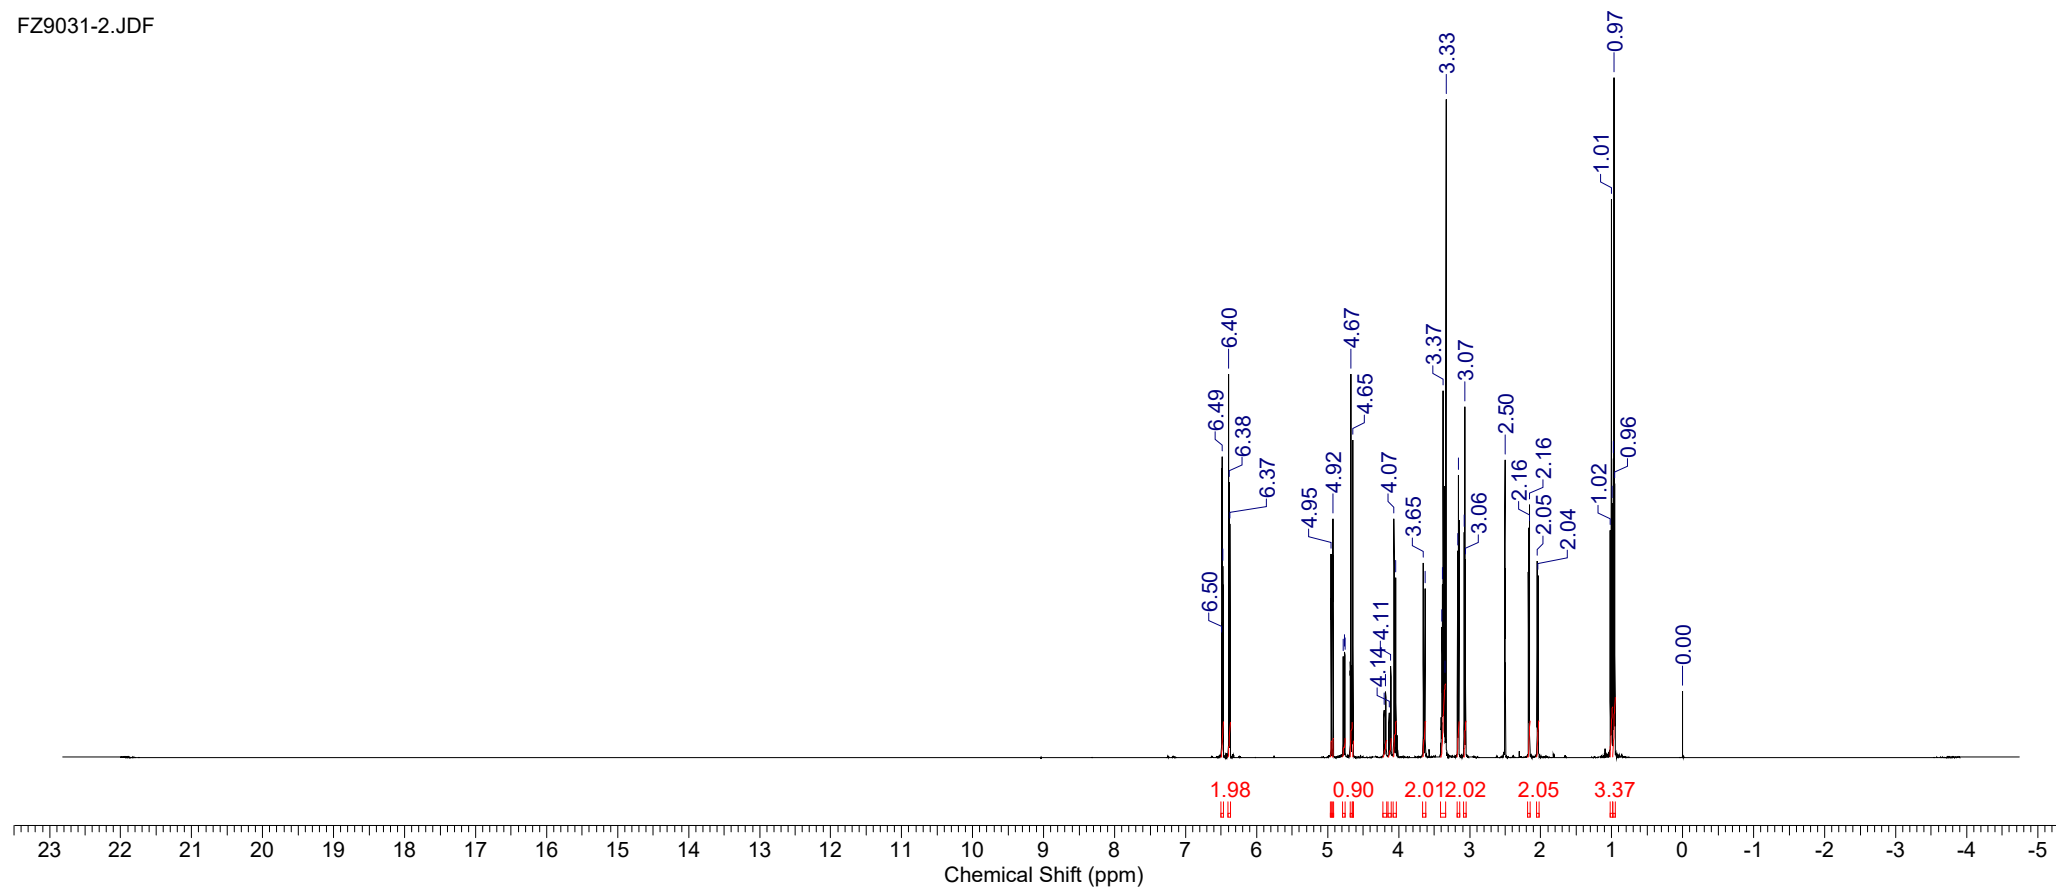

|                                                                                             |                    |
|---------------------------------------------------------------------------------------------|--------------------|
| <b>Formula</b> C <sub>18</sub> H <sub>17</sub> F <sub>3</sub> N <sub>2</sub> O <sub>5</sub> | <b>FW</b> 398.3332 |
|---------------------------------------------------------------------------------------------|--------------------|

|                                                          |                                    |                                       |                                        |
|----------------------------------------------------------|------------------------------------|---------------------------------------|----------------------------------------|
| <b>Acquisition Time (sec)</b> 1.9818                     | <b>Comment</b> single_pulse        | <b>Date</b> 21 Aug 2020 12:25:09      | <b>Date Stamp</b> 21 Aug 2020 12:26:17 |
| <b>File Name</b> C:\USERS\Лабa534\DOWNLOADS\FZ9031-2.JDF | <b>Frequency (MHz)</b> 600.17      | <b>Nucleus</b> 1H                     | <b>Number of Transients</b> 8          |
| <b>Origin</b> ECA 600                                    | <b>Original Points Count</b> 32768 | <b>Owner</b> CKP                      | <b>Points Count</b> 32768              |
| <b>Receiver Gain</b> 36.00                               | <b>Solvent</b> DMSO-d6             | <b>Spectrum Offset (Hz)</b> 5424.2515 | <b>Sweep Width (Hz)</b> 16534.39       |
|                                                          |                                    |                                       | <b>Pulse Sequence</b> single_pulse.ex2 |

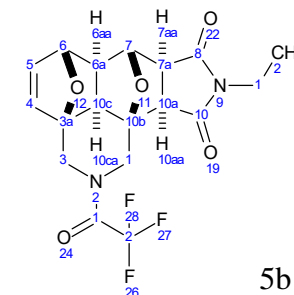

FZ9031-2.JDF

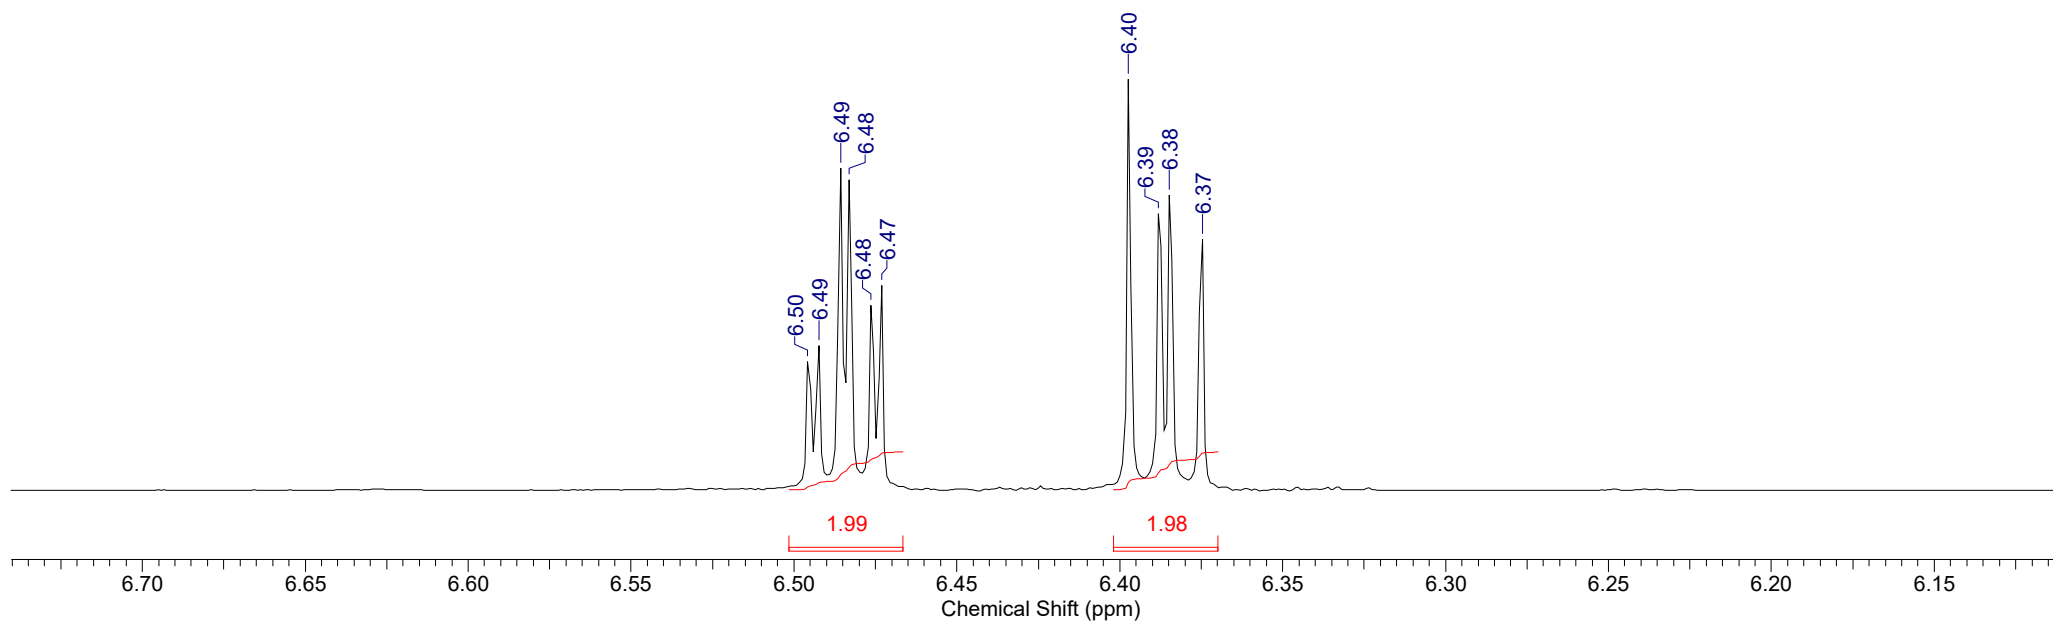

|                                                                                             |                    |
|---------------------------------------------------------------------------------------------|--------------------|
| <b>Formula</b> C <sub>18</sub> H <sub>17</sub> F <sub>3</sub> N <sub>2</sub> O <sub>5</sub> | <b>FW</b> 398.3332 |
|---------------------------------------------------------------------------------------------|--------------------|

|                                                          |                                    |                                       |                                        |
|----------------------------------------------------------|------------------------------------|---------------------------------------|----------------------------------------|
| <b>Acquisition Time (sec)</b> 1.9818                     | <b>Comment</b> single_pulse        | <b>Date</b> 21 Aug 2020 12:25:09      | <b>Date Stamp</b> 21 Aug 2020 12:26:17 |
| <b>File Name</b> C:\USERS\Лабa534\DOWNLOADS\FZ9031-2.JDF | <b>Frequency (MHz)</b> 600.17      | <b>Nucleus</b> 1H                     | <b>Number of Transients</b> 8          |
| <b>Origin</b> ECA 600                                    | <b>Original Points Count</b> 32768 | <b>Owner</b> CKP                      | <b>Points Count</b> 32768              |
| <b>Receiver Gain</b> 36.00                               | <b>Solvent</b> DMSO-d6             | <b>Spectrum Offset (Hz)</b> 5424.2515 | <b>Sweep Width (Hz)</b> 16534.39       |

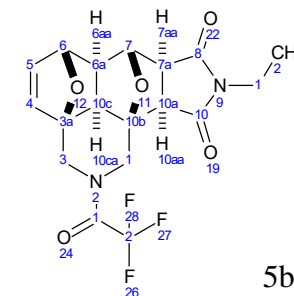

FZ9031-2.JDF

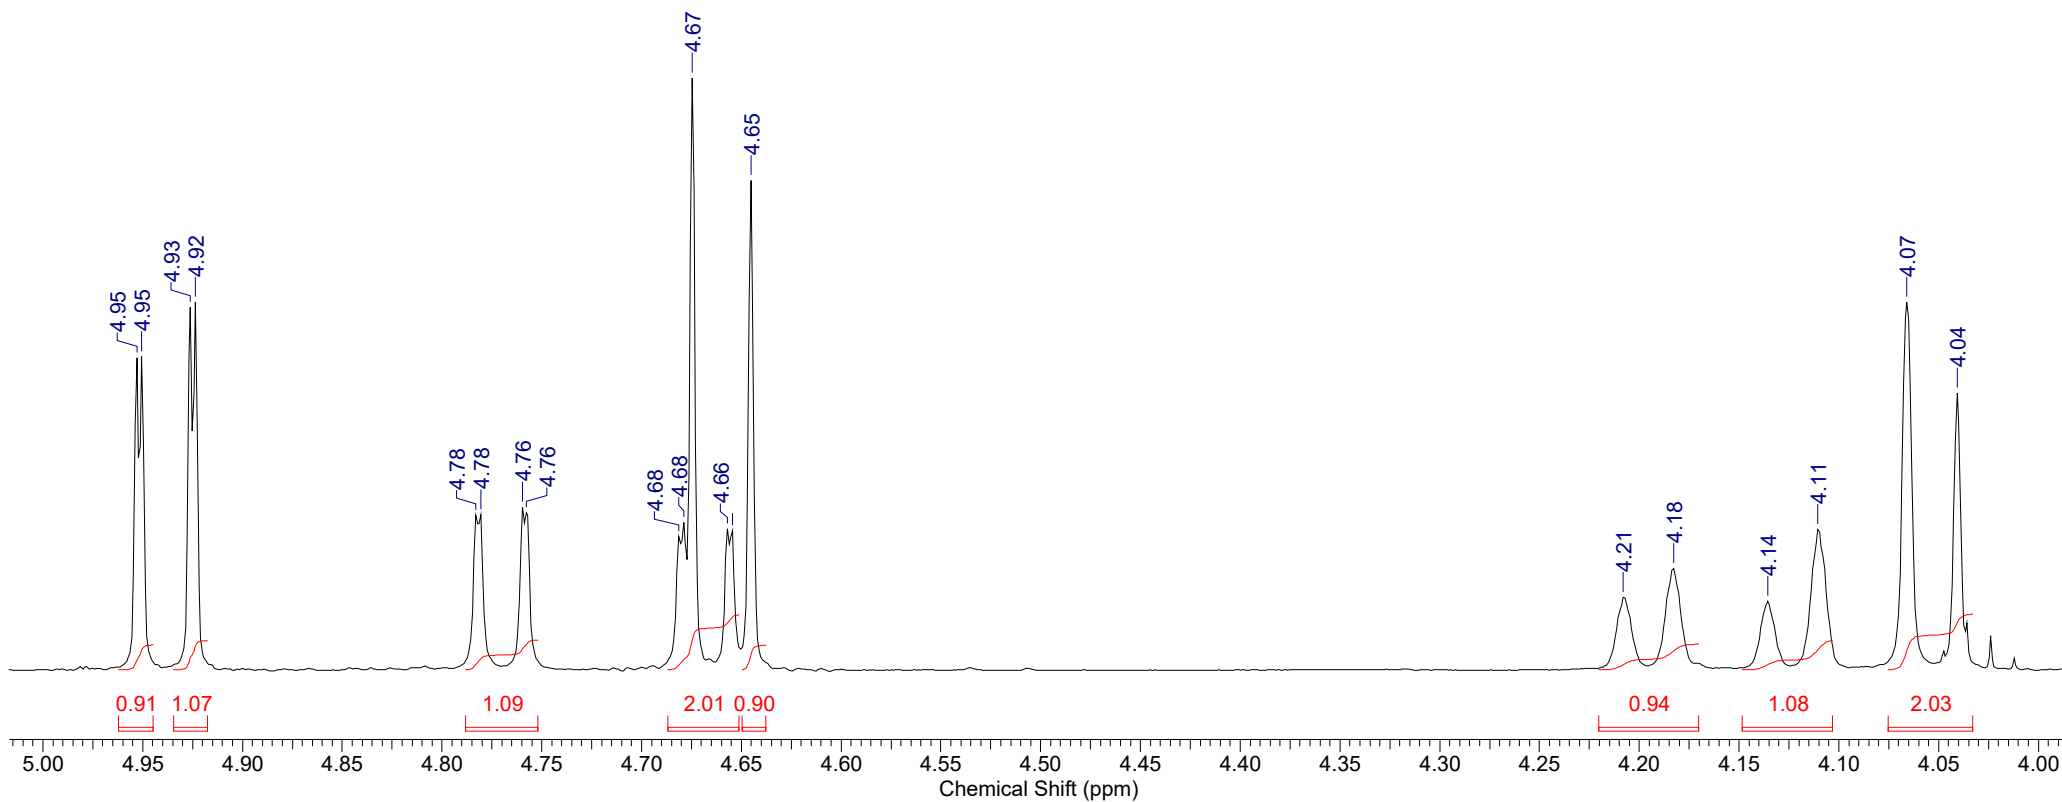

|                                                                                             |                    |
|---------------------------------------------------------------------------------------------|--------------------|
| <b>Formula</b> C <sub>18</sub> H <sub>17</sub> F <sub>3</sub> N <sub>2</sub> O <sub>5</sub> | <b>FW</b> 398.3332 |
|---------------------------------------------------------------------------------------------|--------------------|

|                                                          |                                    |                                       |                                        |
|----------------------------------------------------------|------------------------------------|---------------------------------------|----------------------------------------|
| <b>Acquisition Time (sec)</b> 1.9818                     | <b>Comment</b> single_pulse        | <b>Date</b> 21 Aug 2020 12:25:09      | <b>Date Stamp</b> 21 Aug 2020 12:26:17 |
| <b>File Name</b> C:\USERS\Лабa534\DOWNLOADS\FZ9031-2.JDF | <b>Frequency (MHz)</b> 600.17      | <b>Nucleus</b> 1H                     | <b>Number of Transients</b> 8          |
| <b>Origin</b> ECA 600                                    | <b>Original Points Count</b> 32768 | <b>Owner</b> CKP                      | <b>Points Count</b> 32768              |
| <b>Receiver Gain</b> 36.00                               | <b>Solvent</b> DMSO-d6             | <b>Spectrum Offset (Hz)</b> 5424.2515 | <b>Sweep Width (Hz)</b> 16534.39       |
|                                                          |                                    |                                       | <b>Pulse Sequence</b> single_pulse.ex2 |

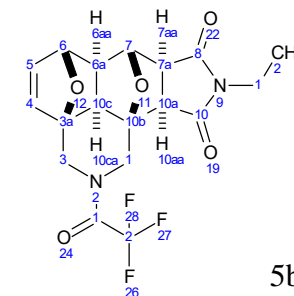

FZ9031-2.JDF

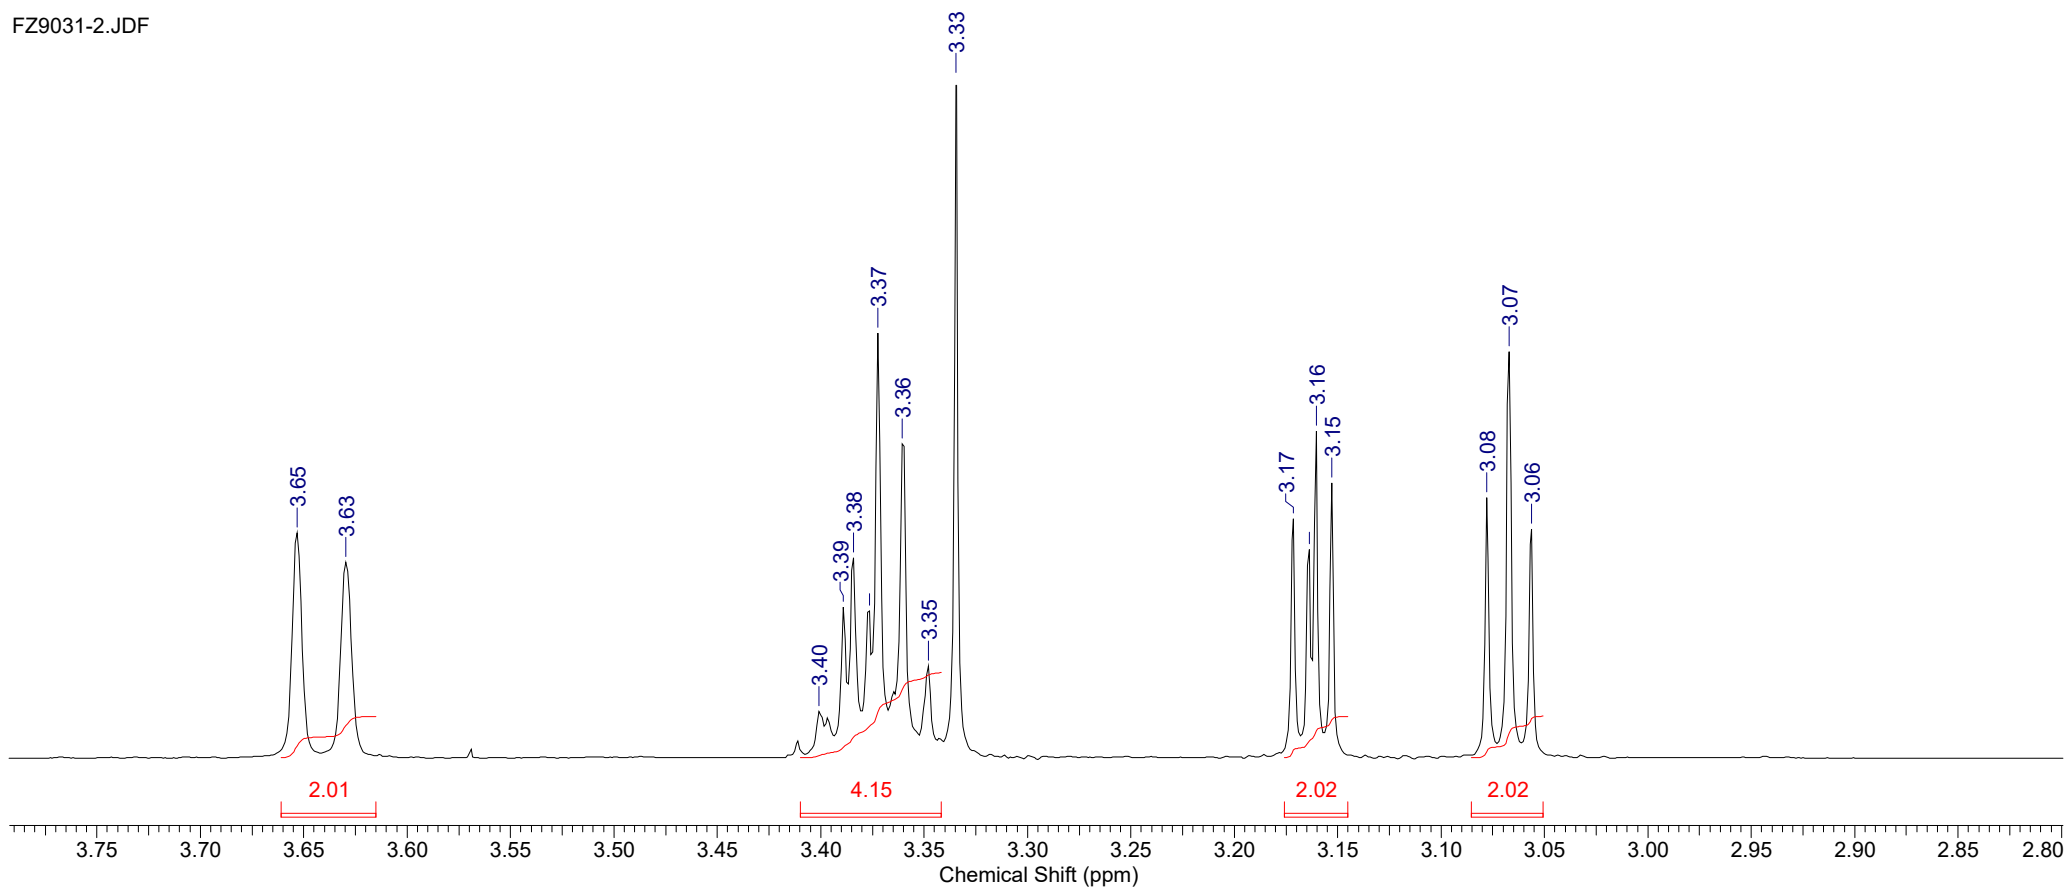



|                                                                                             |                    |
|---------------------------------------------------------------------------------------------|--------------------|
| <b>Formula</b> C <sub>18</sub> H <sub>17</sub> F <sub>3</sub> N <sub>2</sub> O <sub>5</sub> | <b>FW</b> 398.3332 |
|---------------------------------------------------------------------------------------------|--------------------|

|                                                          |                                    |                                        |                                        |
|----------------------------------------------------------|------------------------------------|----------------------------------------|----------------------------------------|
| <b>Acquisition Time (sec)</b> 1.9818                     | <b>Comment</b> single_pulse        | <b>Date</b> 21 Aug 2020 12:25:09       | <b>Date Stamp</b> 21 Aug 2020 12:26:17 |
| <b>File Name</b> C:\USERS\Лабa534\DOWNLOADS\FZ9031-2.JDF | <b>Frequency (MHz)</b> 600.17      | <b>Nucleus</b> 1H                      | <b>Number of Transients</b> 8          |
| <b>Origin</b> ECA 600                                    | <b>Original Points Count</b> 32768 | <b>Owner</b> CKP                       | <b>Points Count</b> 32768              |
| <b>Receiver Gain</b> 36.00                               | <b>Solvent</b> DMSO-d6             | <b>Spectrum Offset (Hz)</b> 5424.2515  | <b>Sweep Width (Hz)</b> 16534.39       |
|                                                          |                                    | <b>Pulse Sequence</b> single_pulse.ex2 |                                        |

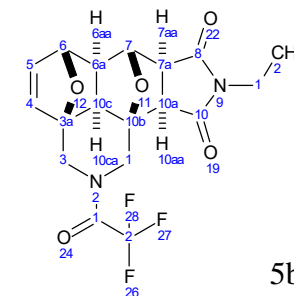

FZ9031-2.JDF

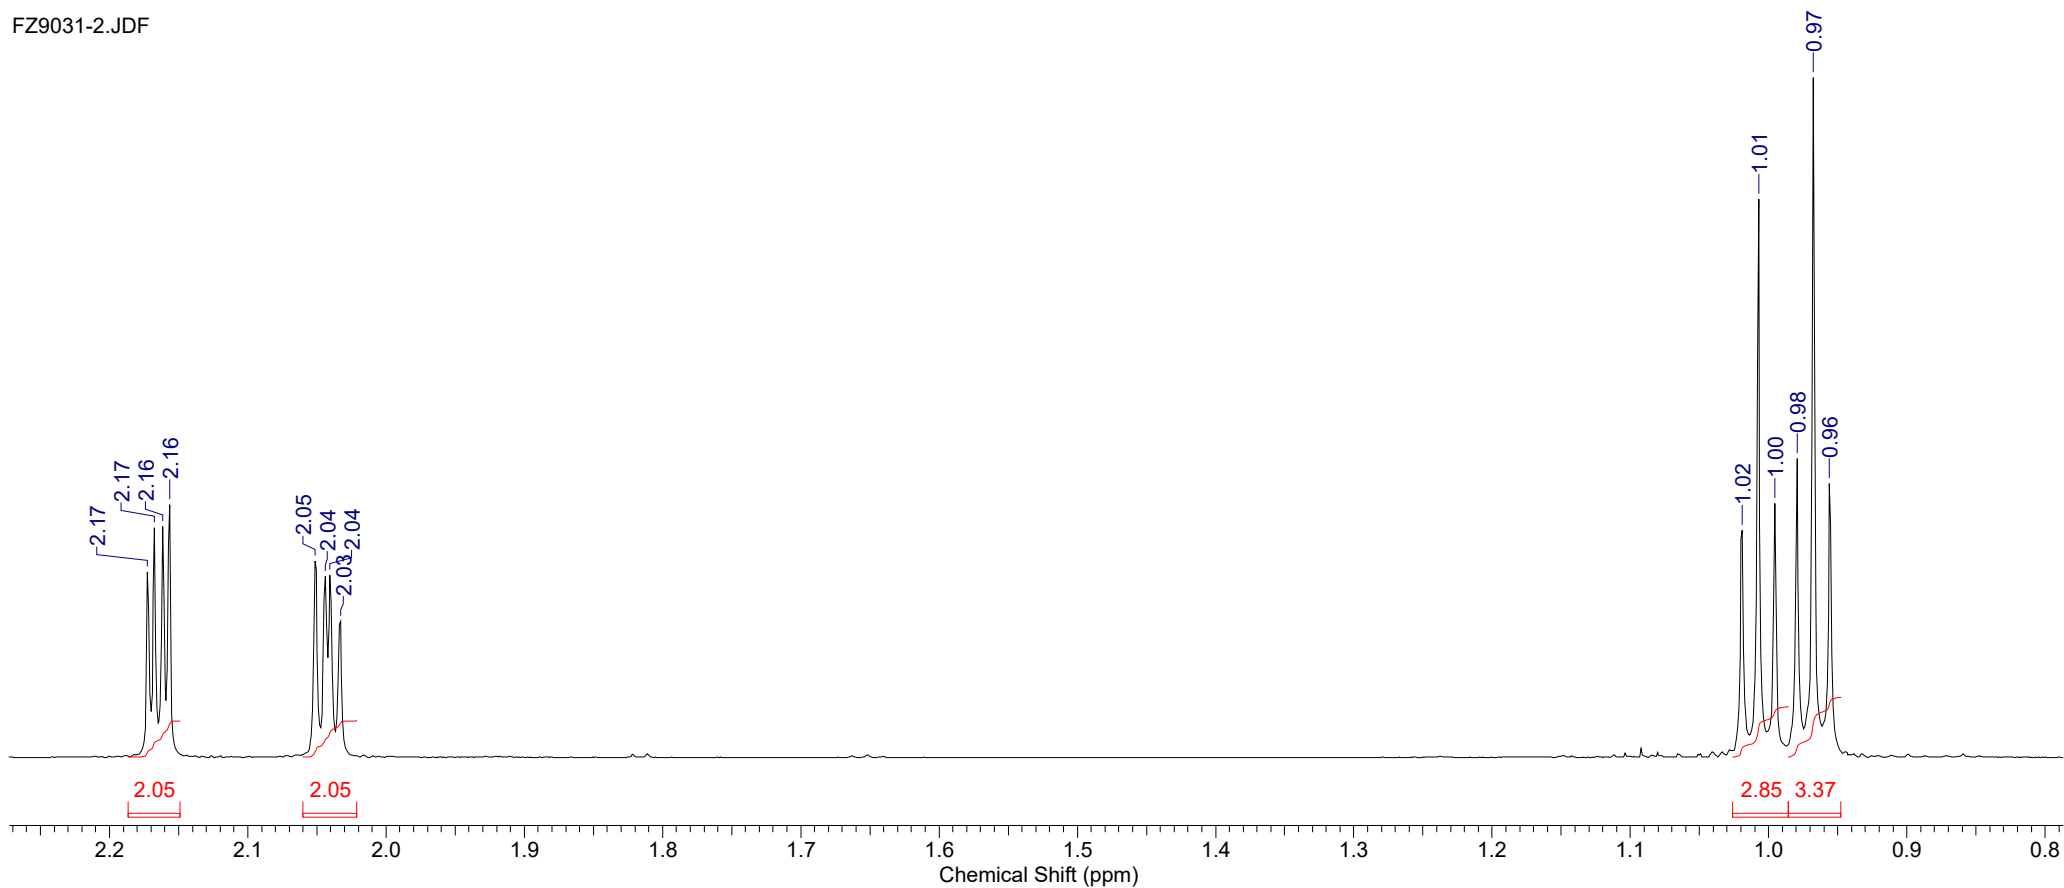

|                                                                                             |                    |
|---------------------------------------------------------------------------------------------|--------------------|
| <b>Formula</b> C <sub>18</sub> H <sub>17</sub> F <sub>3</sub> N <sub>2</sub> O <sub>5</sub> | <b>FW</b> 398.3332 |
|---------------------------------------------------------------------------------------------|--------------------|

|                                        |                                                           |                                    |
|----------------------------------------|-----------------------------------------------------------|------------------------------------|
| <b>Acquisition Time (sec)</b> 0.6921   | <b>Comment</b> single pulse decoupled gated NOE           | <b>Date</b> 21 Aug 2020 12:41:55   |
| <b>Date Stamp</b> 21 Aug 2020 12:43:04 | <b>File Name</b> C:\USERS\l1a6a534\DOWNLOADS\FZ9031-3.JDF | <b>Frequency (MHz)</b> 150.91      |
| <b>Nucleus</b> 13C                     | <b>Number of Transients</b> 1000                          | <b>Origin</b> ECA 600              |
| <b>Points Count</b> 32768              | <b>Pulse Sequence</b> single pulse dec                    | <b>Original Points Count</b> 32768 |
| <b>Spectrum Offset (Hz)</b> 15091.3428 | <b>Sweep Width (Hz)</b> 47348.49                          | <b>Receiver Gain</b> 56.00         |
|                                        |                                                           | <b>Solvent</b> DMSO-d6             |

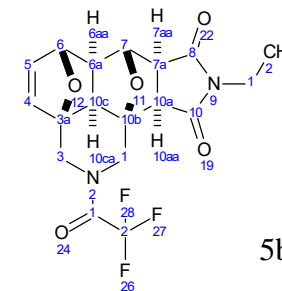

FZ9031-3-13C-5D.ESP

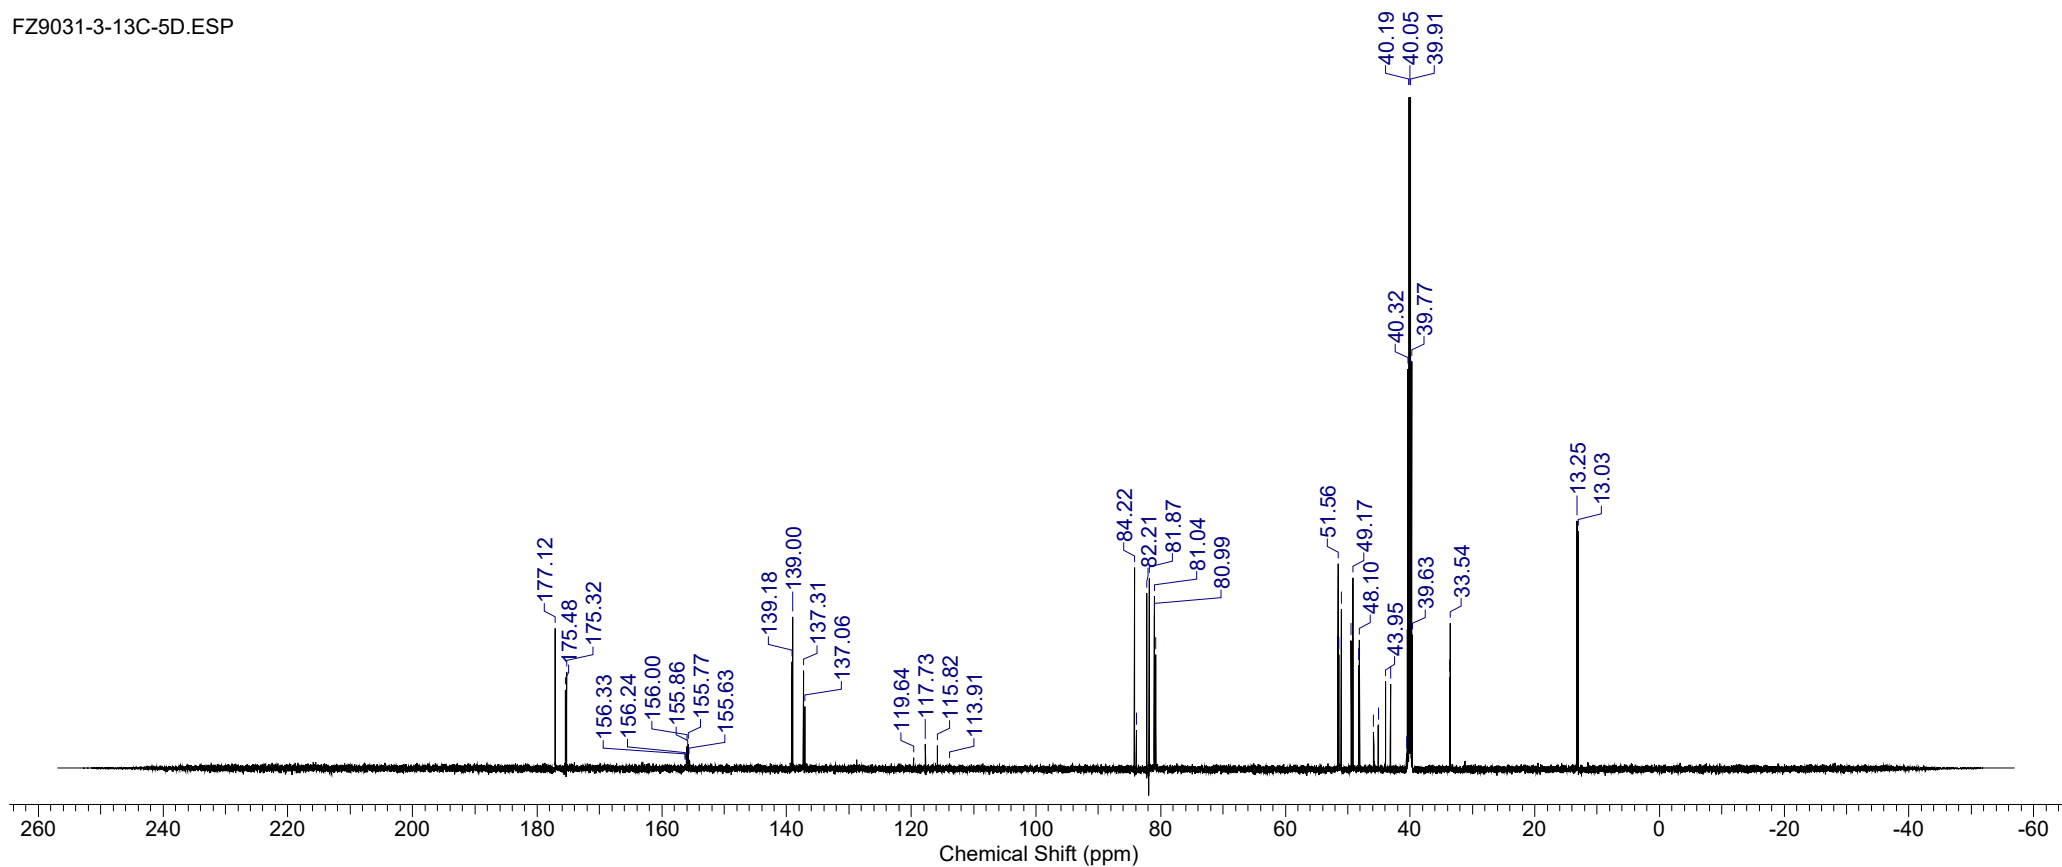

|                                                                                             |                    |
|---------------------------------------------------------------------------------------------|--------------------|
| <b>Formula</b> C <sub>18</sub> H <sub>17</sub> F <sub>3</sub> N <sub>2</sub> O <sub>5</sub> | <b>FW</b> 398.3332 |
|---------------------------------------------------------------------------------------------|--------------------|

|                                        |                                                           |                                    |
|----------------------------------------|-----------------------------------------------------------|------------------------------------|
| <b>Acquisition Time (sec)</b> 0.6921   | <b>Comment</b> single pulse decoupled gated NOE           | <b>Date</b> 21 Aug 2020 12:41:55   |
| <b>Date Stamp</b> 21 Aug 2020 12:43:04 | <b>File Name</b> C:\USERS\lta6a534\DOWNLOADS\FZ9031-3.JDF | <b>Frequency (MHz)</b> 150.91      |
| <b>Nucleus</b> 13C                     | <b>Number of Transients</b> 1000                          | <b>Origin</b> ECA 600              |
| <b>Points Count</b> 32768              | <b>Pulse Sequence</b> single pulse dec                    | <b>Original Points Count</b> 32768 |
| <b>Spectrum Offset (Hz)</b> 15091.3428 | <b>Sweep Width (Hz)</b> 47348.49                          | <b>Receiver Gain</b> 56.00         |
|                                        |                                                           | <b>Solvent</b> DMSO-d6             |

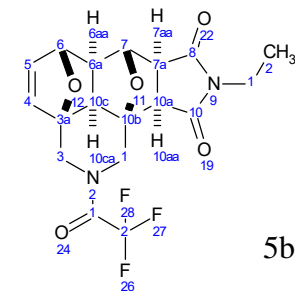

FZ9031-3-13C-5D.ESP

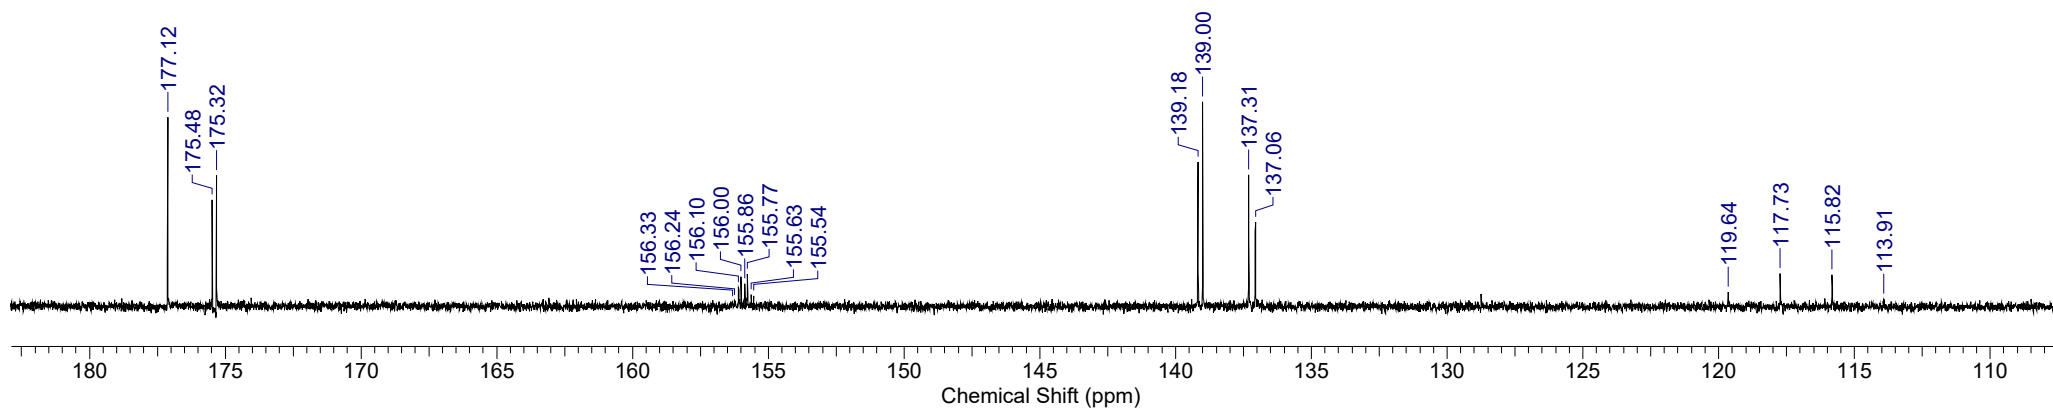

|                                                                                             |                    |
|---------------------------------------------------------------------------------------------|--------------------|
| <b>Formula</b> C <sub>18</sub> H <sub>17</sub> F <sub>3</sub> N <sub>2</sub> O <sub>5</sub> | <b>FW</b> 398.3332 |
|---------------------------------------------------------------------------------------------|--------------------|

|                                        |                                                           |                                    |
|----------------------------------------|-----------------------------------------------------------|------------------------------------|
| <b>Acquisition Time (sec)</b> 0.6921   | <b>Comment</b> single pulse decoupled gated NOE           | <b>Date</b> 21 Aug 2020 12:41:55   |
| <b>Date Stamp</b> 21 Aug 2020 12:43:04 | <b>File Name</b> C:\USERS\lta6a534\DOWNLOADS\FZ9031-3.JDF | <b>Frequency (MHz)</b> 150.91      |
| <b>Nucleus</b> 13C                     | <b>Number of Transients</b> 1000                          | <b>Origin</b> ECA 600              |
| <b>Points Count</b> 32768              | <b>Pulse Sequence</b> single pulse dec                    | <b>Original Points Count</b> 32768 |
| <b>Spectrum Offset (Hz)</b> 15091.3428 | <b>Sweep Width (Hz)</b> 47348.49                          | <b>Receiver Gain</b> 56.00         |
|                                        |                                                           | <b>Solvent</b> DMSO-d6             |

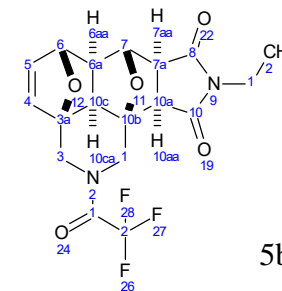

FZ9031-3-13C-5D.ESP

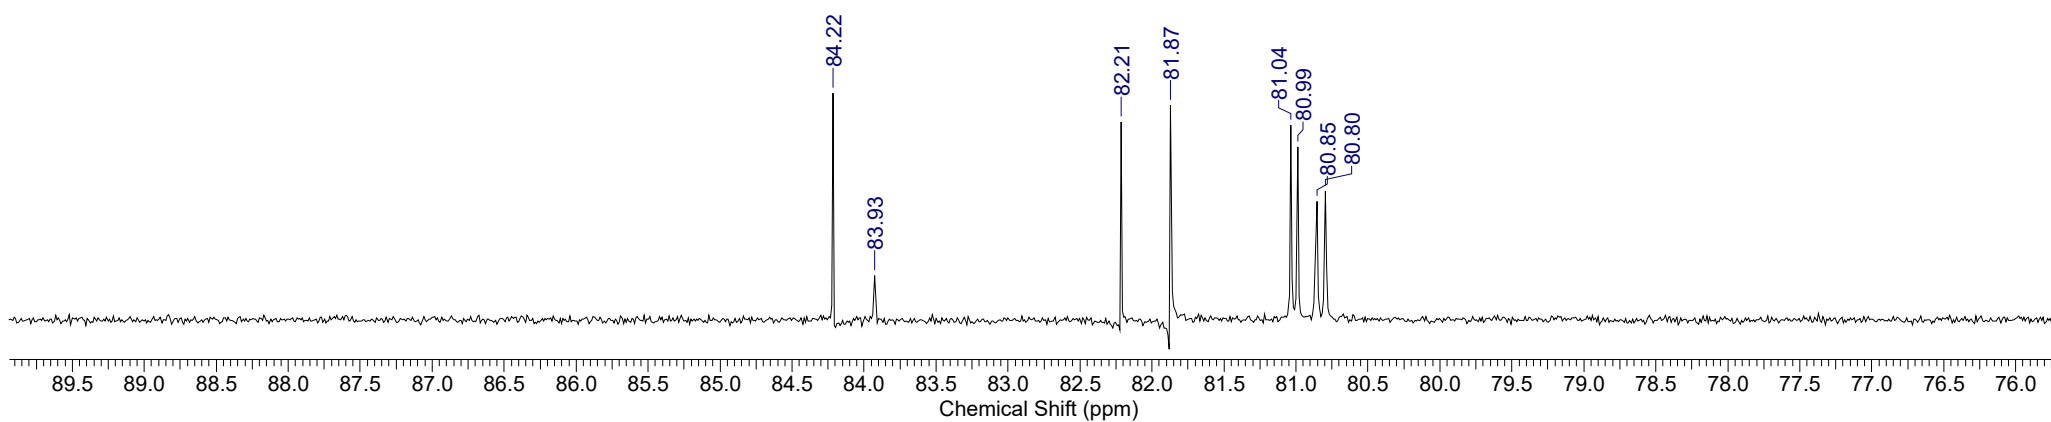

|                                                                                             |                    |
|---------------------------------------------------------------------------------------------|--------------------|
| <b>Formula</b> C <sub>18</sub> H <sub>17</sub> F <sub>3</sub> N <sub>2</sub> O <sub>5</sub> | <b>FW</b> 398.3332 |
|---------------------------------------------------------------------------------------------|--------------------|

|                                        |                                                           |                                    |
|----------------------------------------|-----------------------------------------------------------|------------------------------------|
| <b>Acquisition Time (sec)</b> 0.6921   | <b>Comment</b> single pulse decoupled gated NOE           | <b>Date</b> 21 Aug 2020 12:41:55   |
| <b>Date Stamp</b> 21 Aug 2020 12:43:04 | <b>File Name</b> C:\USERS\lta6a534\DOWNLOADS\FZ9031-3.JDF | <b>Frequency (MHz)</b> 150.91      |
| <b>Nucleus</b> 13C                     | <b>Number of Transients</b> 1000                          | <b>Origin</b> ECA 600              |
| <b>Points Count</b> 32768              | <b>Pulse Sequence</b> single pulse dec                    | <b>Original Points Count</b> 32768 |
| <b>Spectrum Offset (Hz)</b> 15091.3428 | <b>Sweep Width (Hz)</b> 47348.49                          | <b>Receiver Gain</b> 56.00         |
|                                        |                                                           | <b>Owner</b> CKP                   |
|                                        |                                                           | <b>Solvent</b> DMSO-d6             |

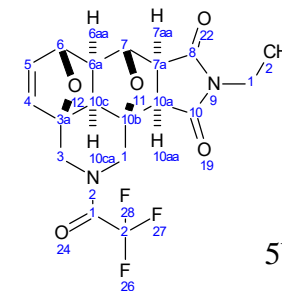

FZ9031-3-13C-5D.ESP

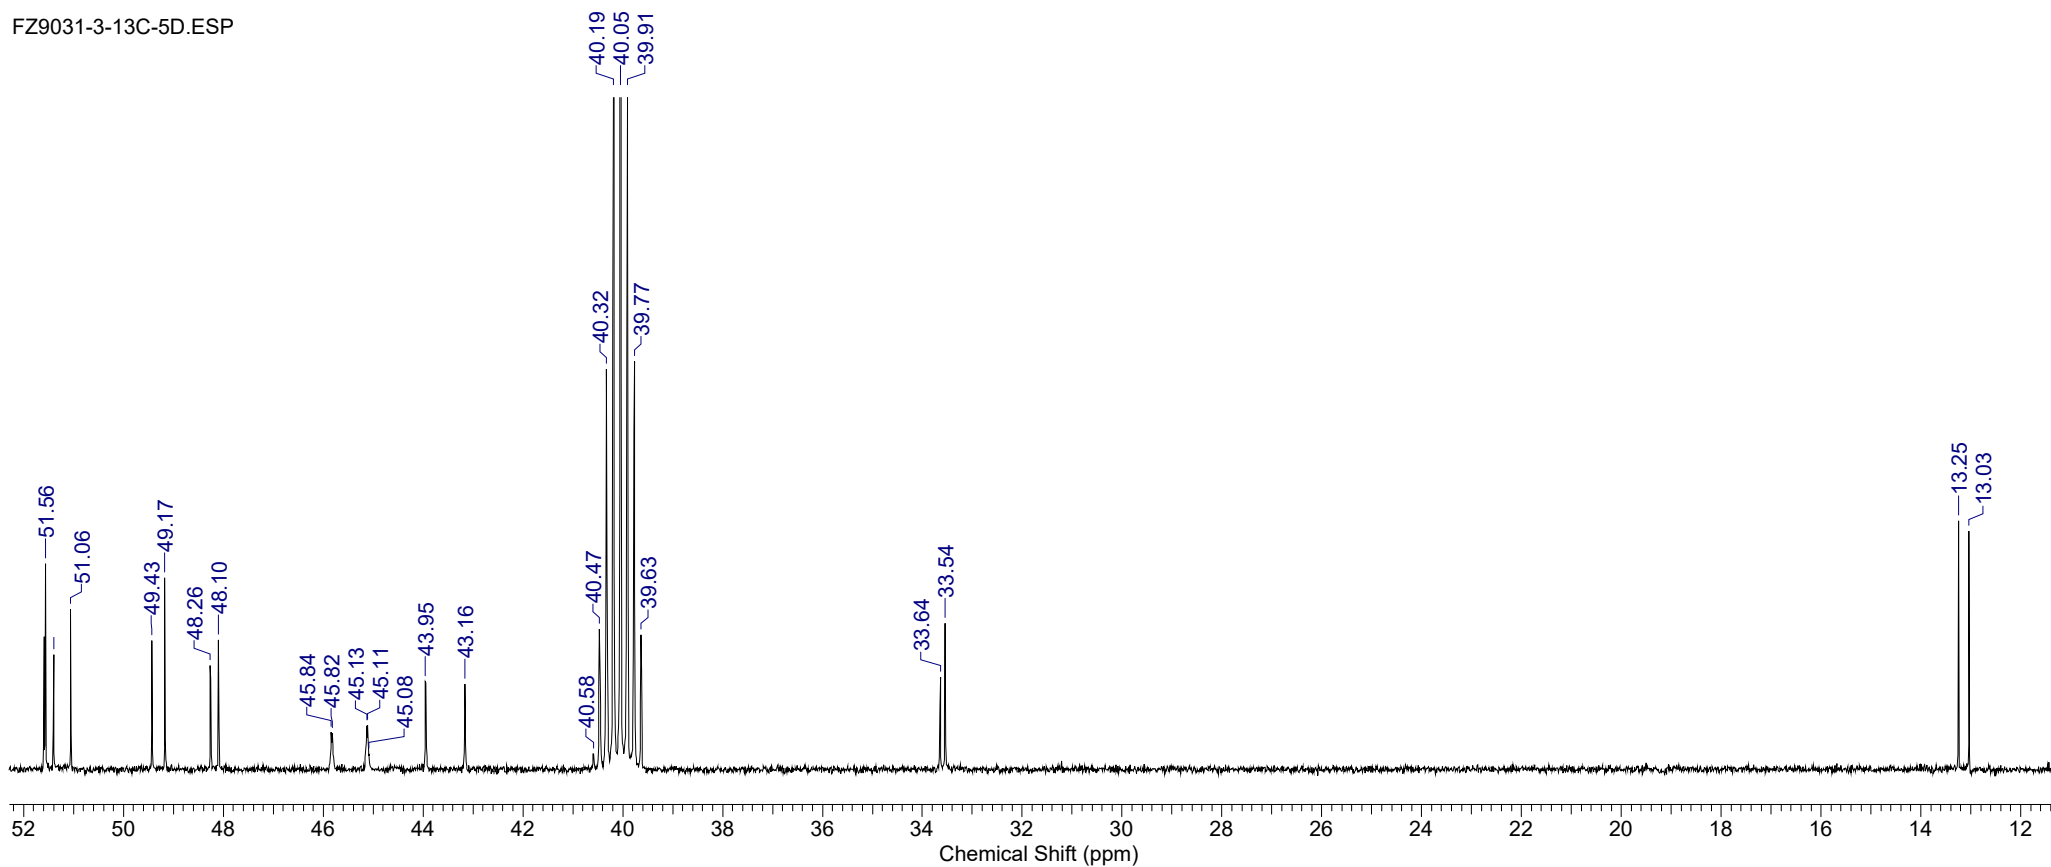

|                                                                                             |                    |
|---------------------------------------------------------------------------------------------|--------------------|
| <b>Formula</b> C <sub>18</sub> H <sub>17</sub> F <sub>3</sub> N <sub>2</sub> O <sub>5</sub> | <b>FW</b> 398.3332 |
|---------------------------------------------------------------------------------------------|--------------------|

|                                                          |                                    |                                         |                                        |
|----------------------------------------------------------|------------------------------------|-----------------------------------------|----------------------------------------|
| <b>Acquisition Time (sec)</b> 0.4614                     | <b>Comment</b> single_pulse        | <b>Date</b> 21 Aug 2020 12:23:32        | <b>Date Stamp</b> 21 Aug 2020 12:24:41 |
| <b>File Name</b> C:\USERS\Лабa534\DOWNLOADS\FZ9031-1.JDF | <b>Frequency (MHz)</b> 564.73      | <b>Nucleus</b> 19F                      | <b>Number of Transients</b> 8          |
| <b>Origin</b> ECA 600                                    | <b>Original Points Count</b> 65536 | <b>Owner</b> CKP                        | <b>Points Count</b> 65536              |
| <b>Receiver Gain</b> 40.00                               | <b>Solvent</b> DMSO-d6             | <b>Spectrum Offset (Hz)</b> -56472.6094 | <b>Sweep Width (Hz)</b> 142045.45      |
|                                                          |                                    |                                         | <b>Pulse Sequence</b> single_pulse.ex2 |

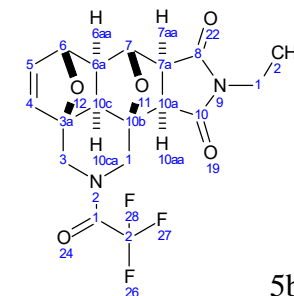

FZ9031-1.JDF

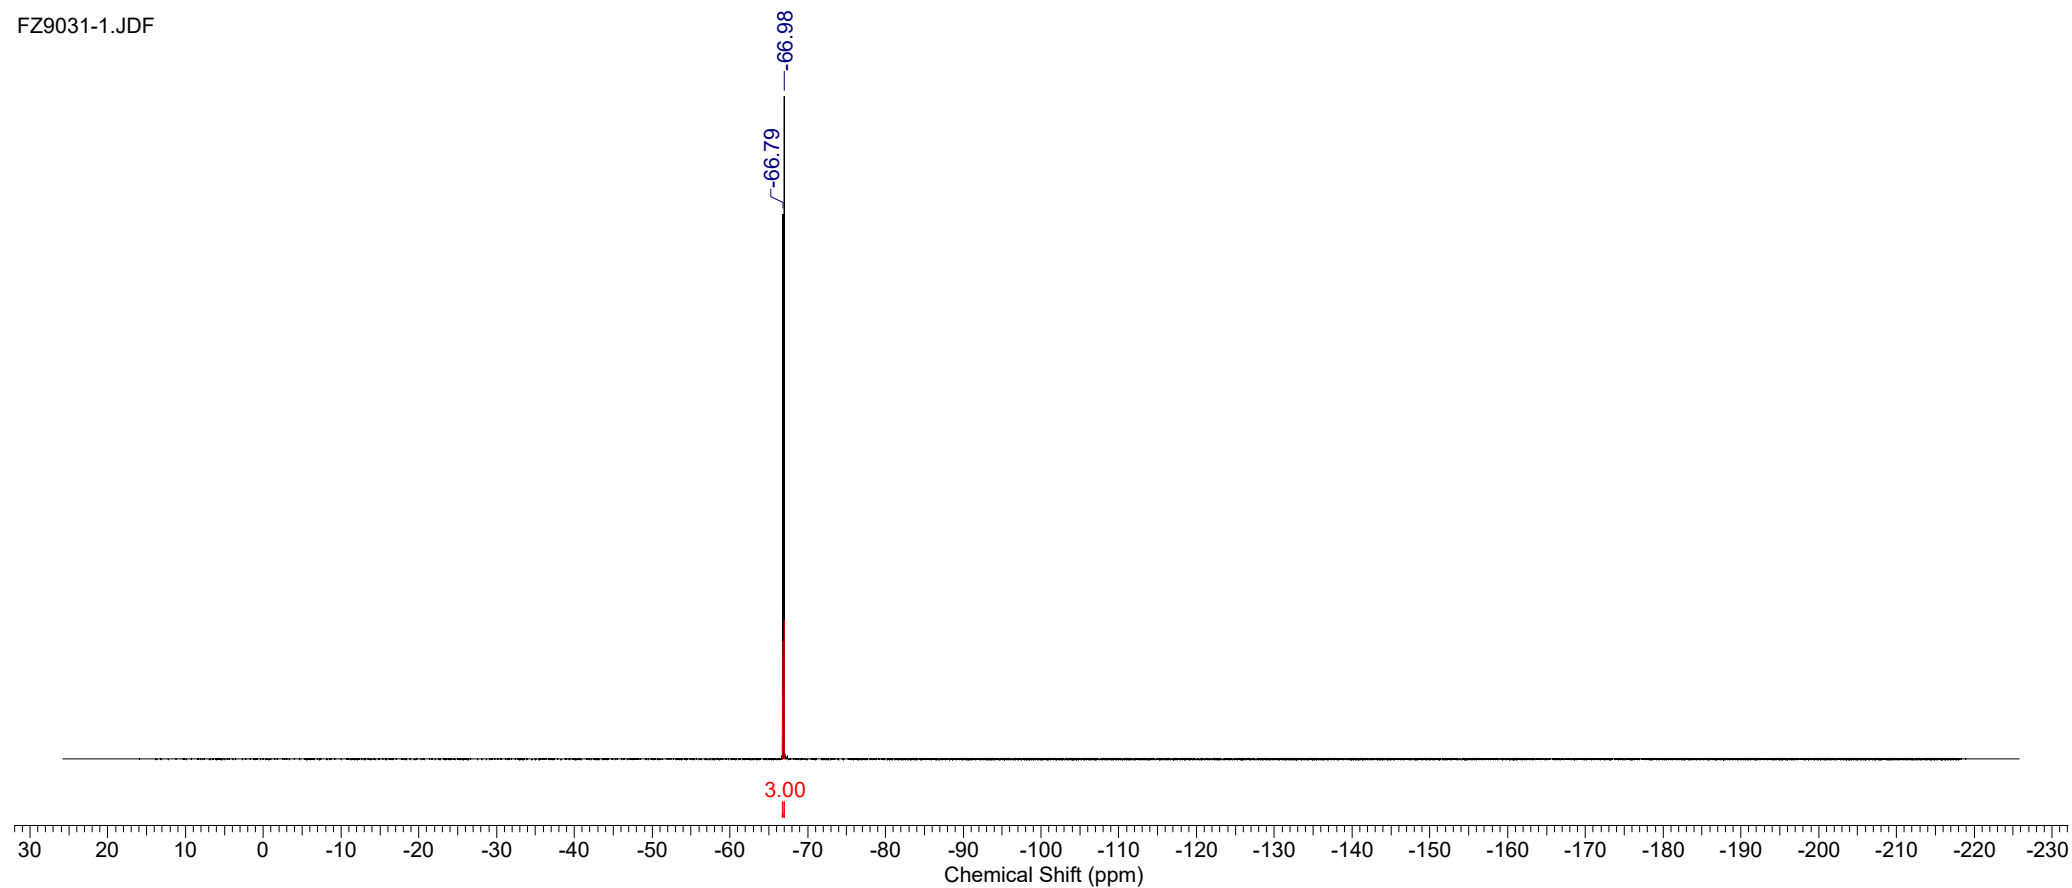

|                                                                                             |                    |
|---------------------------------------------------------------------------------------------|--------------------|
| <b>Formula</b> C <sub>18</sub> H <sub>17</sub> F <sub>3</sub> N <sub>2</sub> O <sub>5</sub> | <b>FW</b> 398.3332 |
|---------------------------------------------------------------------------------------------|--------------------|

|                                                          |                                    |                                         |                                        |
|----------------------------------------------------------|------------------------------------|-----------------------------------------|----------------------------------------|
| <b>Acquisition Time (sec)</b> 0.4614                     | <b>Comment</b> single_pulse        | <b>Date</b> 21 Aug 2020 12:23:32        | <b>Date Stamp</b> 21 Aug 2020 12:24:41 |
| <b>File Name</b> C:\USERS\Лабa534\DOWNLOADS\FZ9031-1.JDF | <b>Frequency (MHz)</b> 564.73      | <b>Nucleus</b> 19F                      | <b>Number of Transients</b> 8          |
| <b>Origin</b> ECA 600                                    | <b>Original Points Count</b> 65536 | <b>Owner</b> CKP                        | <b>Points Count</b> 65536              |
| <b>Receiver Gain</b> 40.00                               | <b>Solvent</b> DMSO-d6             | <b>Spectrum Offset (Hz)</b> -56472.6094 | <b>Sweep Width (Hz)</b> 142045.45      |
|                                                          |                                    |                                         | <b>Pulse Sequence</b> single_pulse.ex2 |

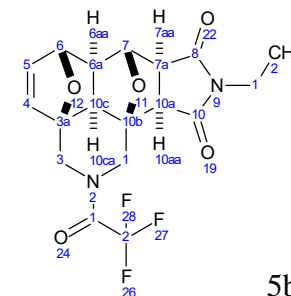

FZ9031-1.JDF

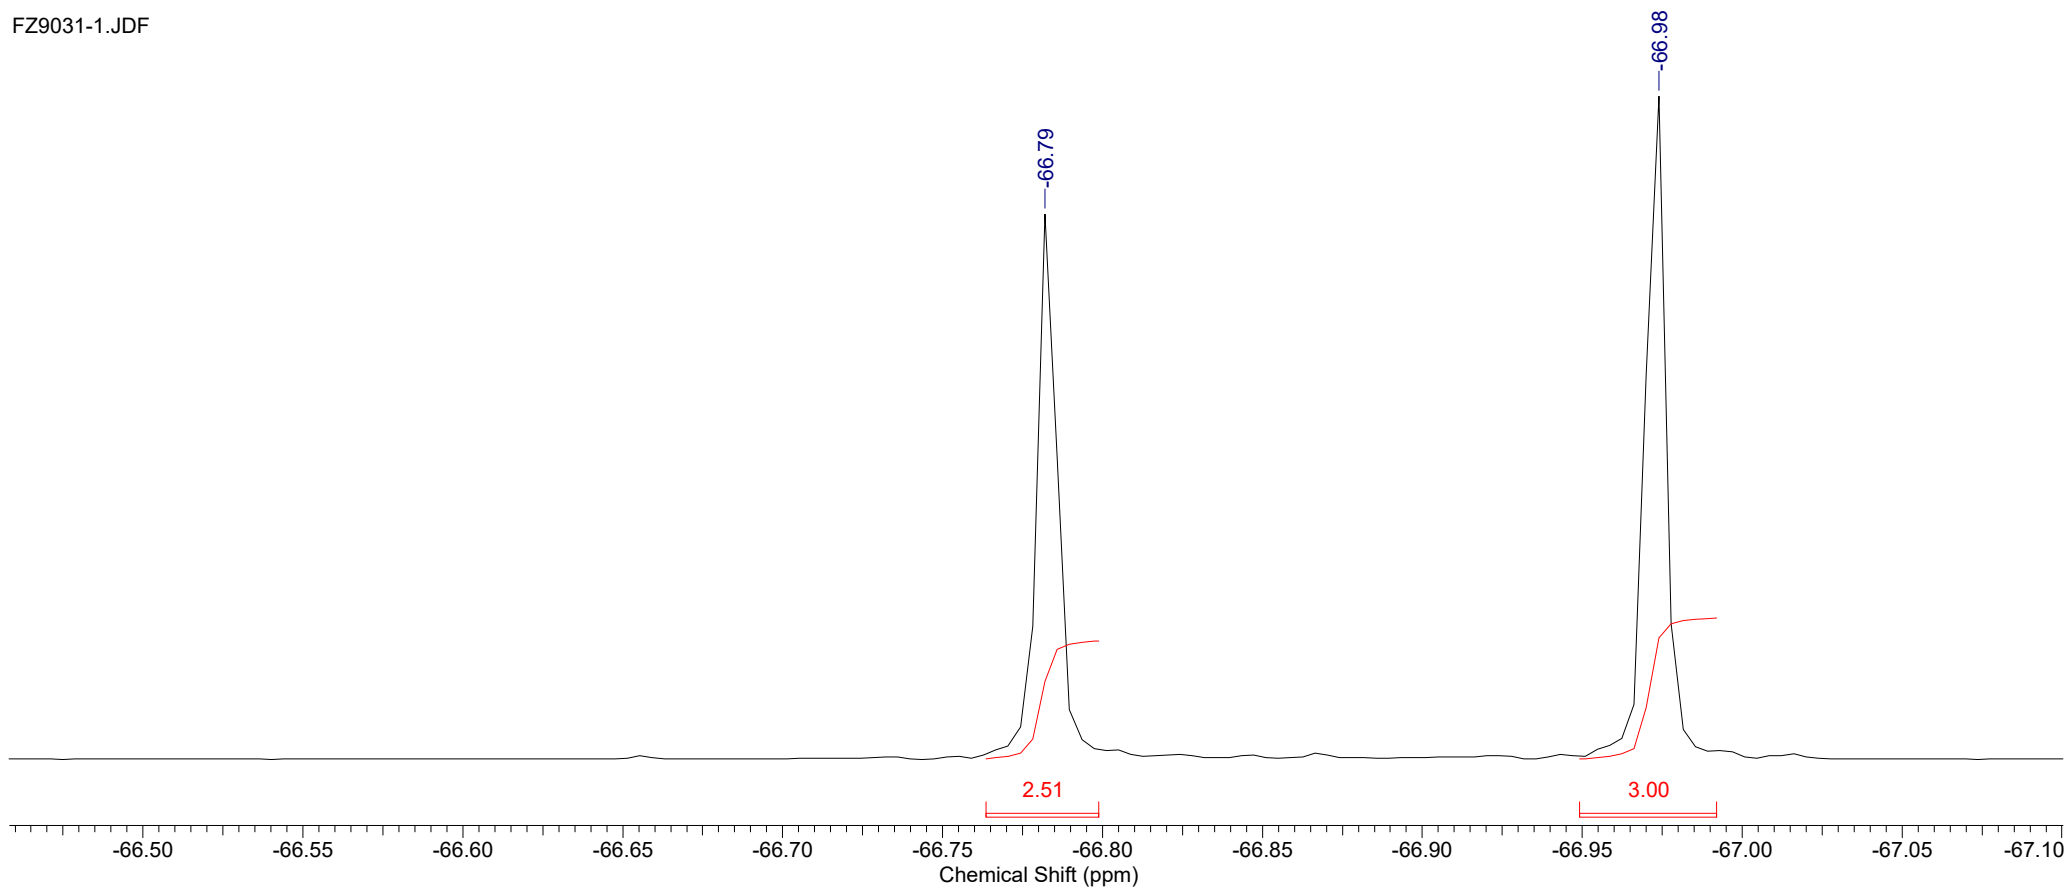

|                                                                |                    |
|----------------------------------------------------------------|--------------------|
| <b>Formula</b> C <sub>16</sub> H <sub>17</sub> NO <sub>5</sub> | <b>FW</b> 303.3099 |
|----------------------------------------------------------------|--------------------|

|                                                              |                                    |                                       |                                        |
|--------------------------------------------------------------|------------------------------------|---------------------------------------|----------------------------------------|
| <b>Acquisition Time (sec)</b> 1.9818                         | <b>Comment</b> single_pulse        | <b>Date</b> 19 Jan 1990 16:32:39      | <b>Date Stamp</b> 07 Nov 2018 12:21:33 |
| <b>File Name</b> C:\USERS\Лабa534\DOWNLOADS\FZ6945-1 (1).JDF | <b>Frequency (MHz)</b> 600.17      | <b>Nucleus</b> 1H                     | <b>Number of Transients</b> 8          |
| <b>Origin</b> ECA 600                                        | <b>Original Points Count</b> 32768 | <b>Owner</b> delta                    | <b>Points Count</b> 32768              |
| <b>Receiver Gain</b> 38.00                                   | <b>Solvent</b> DMSO-d6             | <b>Spectrum Offset (Hz)</b> 5423.2422 | <b>Sweep Width (Hz)</b> 16534.39       |
|                                                              |                                    |                                       | <b>Pulse Sequence</b> single_pulse.ex2 |

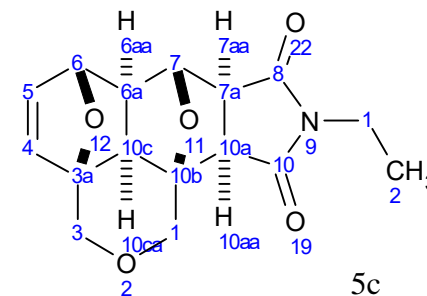

FZ6945-1 (1).JDF

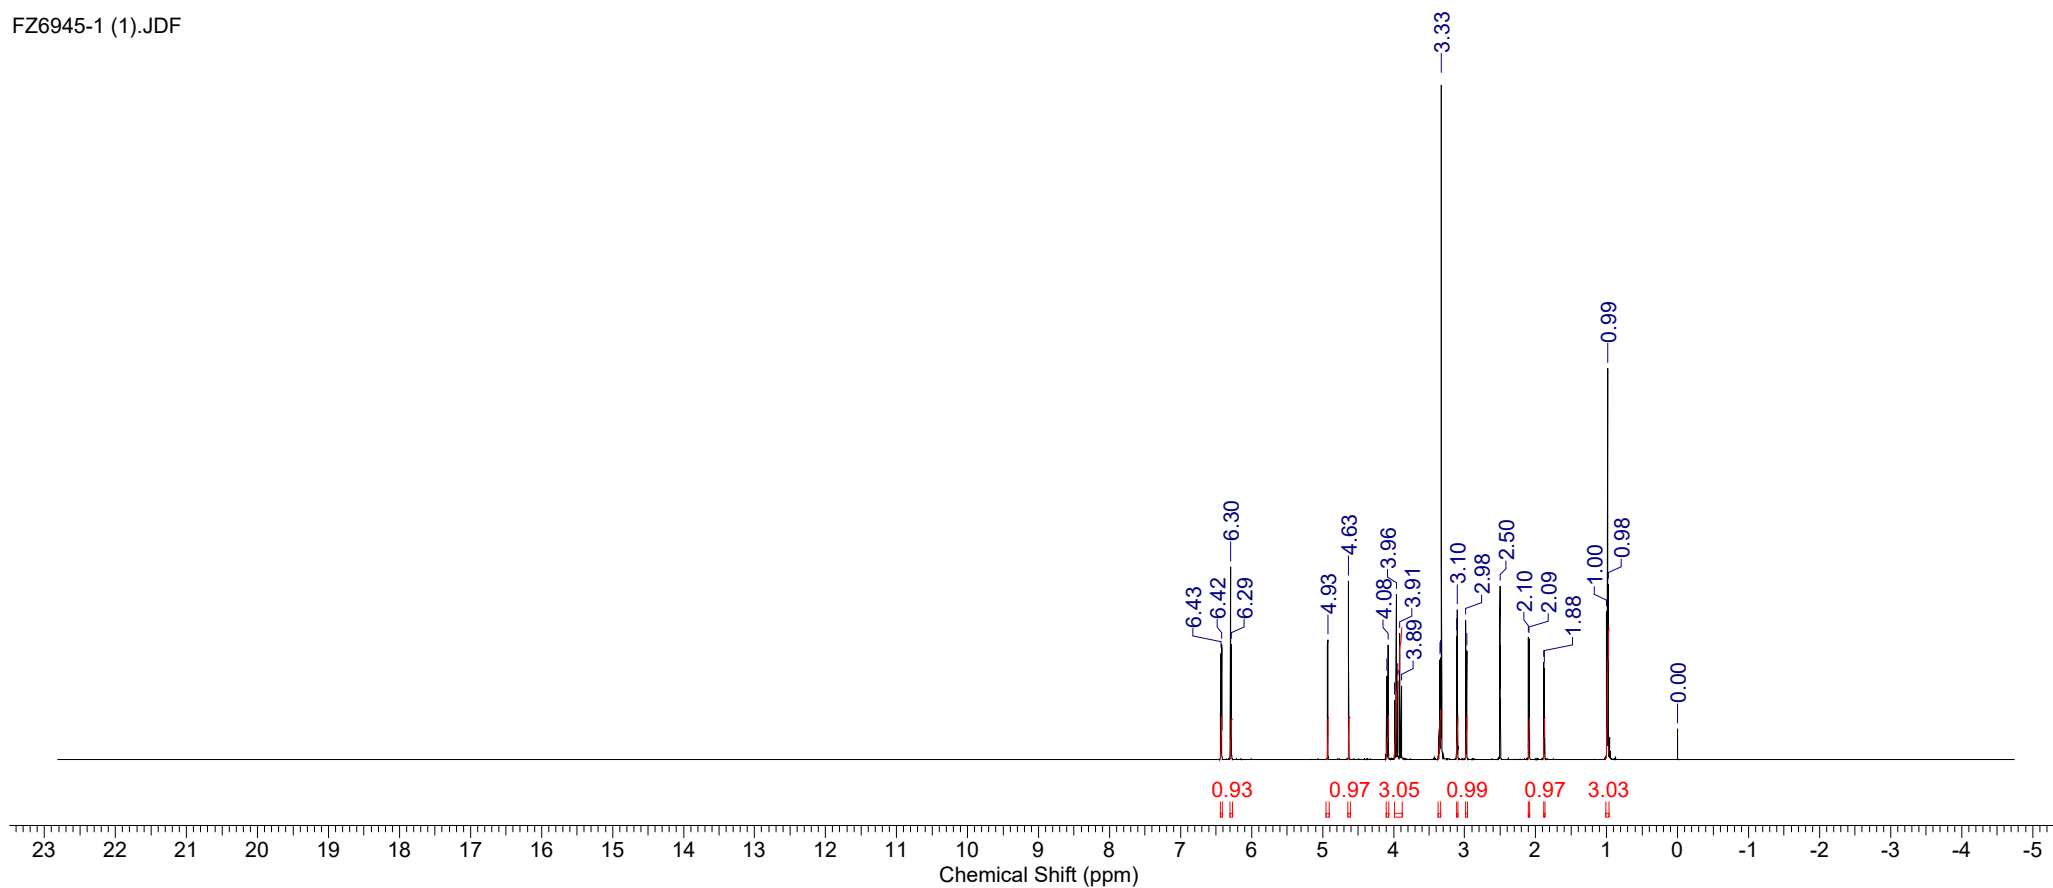



|                                                                |                    |
|----------------------------------------------------------------|--------------------|
| <b>Formula</b> C <sub>16</sub> H <sub>17</sub> NO <sub>5</sub> | <b>FW</b> 303.3099 |
|----------------------------------------------------------------|--------------------|

|                                                              |                                    |                                       |                                        |
|--------------------------------------------------------------|------------------------------------|---------------------------------------|----------------------------------------|
| <b>Acquisition Time (sec)</b> 1.9818                         | <b>Comment</b> single_pulse        | <b>Date</b> 19 Jan 1990 16:32:39      | <b>Date Stamp</b> 07 Nov 2018 12:21:33 |
| <b>File Name</b> C:\USERS\Лабa534\DOWNLOADS\FZ6945-1 (1).JDF | <b>Frequency (MHz)</b> 600.17      | <b>Nucleus</b> 1H                     | <b>Number of Transients</b> 8          |
| <b>Origin</b> ECA 600                                        | <b>Original Points Count</b> 32768 | <b>Owner</b> delta                    | <b>Points Count</b> 32768              |
| <b>Receiver Gain</b> 38.00                                   | <b>Solvent</b> DMSO-d6             | <b>Spectrum Offset (Hz)</b> 5423.2422 | <b>Sweep Width (Hz)</b> 16534.39       |
|                                                              |                                    |                                       | <b>Pulse Sequence</b> single_pulse.ex2 |

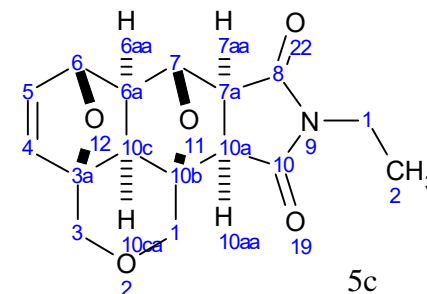

FZ6945-1 (1).JDF

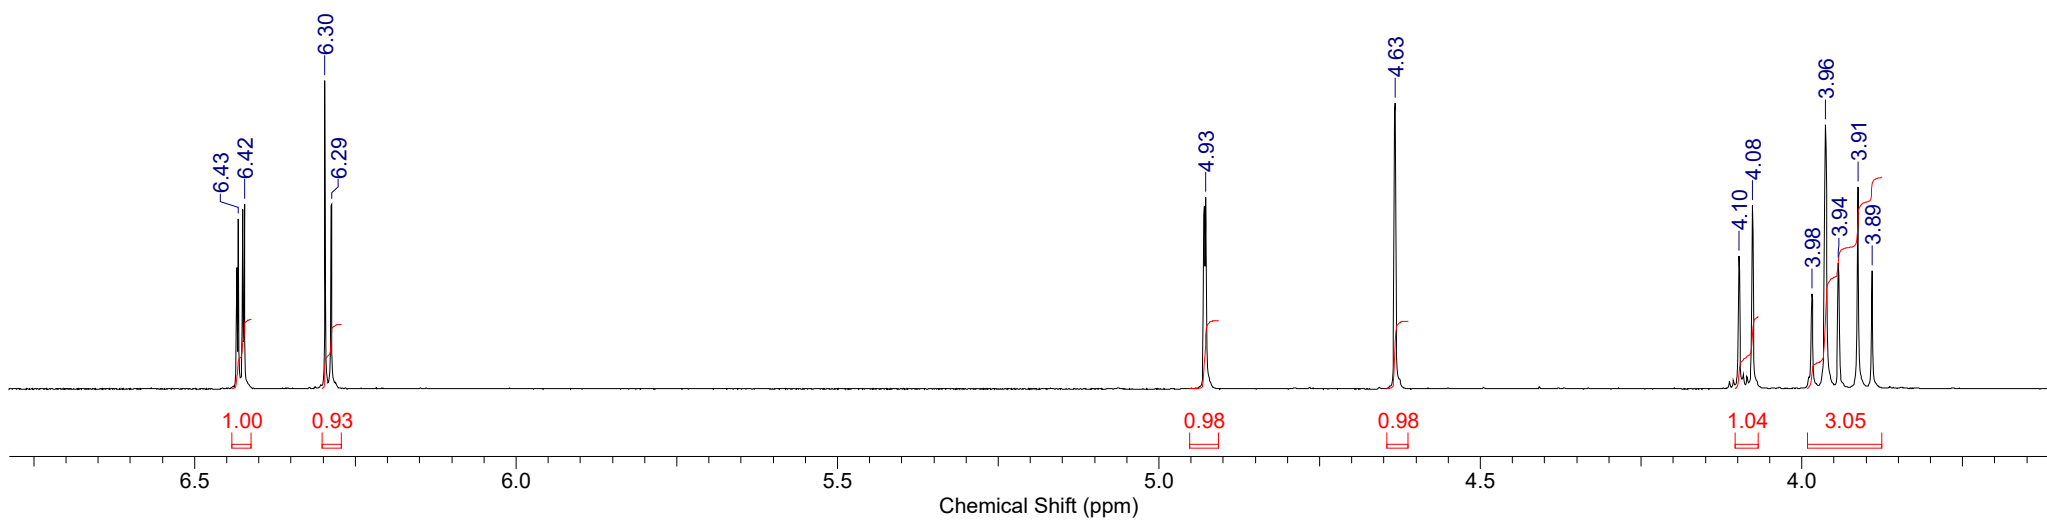

|                                                                |                    |
|----------------------------------------------------------------|--------------------|
| <b>Formula</b> C <sub>16</sub> H <sub>17</sub> NO <sub>5</sub> | <b>FW</b> 303.3099 |
|----------------------------------------------------------------|--------------------|

|                                                              |                                    |                                       |                                        |
|--------------------------------------------------------------|------------------------------------|---------------------------------------|----------------------------------------|
| <b>Acquisition Time (sec)</b> 1.9818                         | <b>Comment</b> single_pulse        | <b>Date</b> 19 Jan 1990 16:32:39      | <b>Date Stamp</b> 07 Nov 2018 12:21:33 |
| <b>File Name</b> C:\USERS\Лабa534\DOWNLOADS\FZ6945-1 (1).JDF | <b>Frequency (MHz)</b> 600.17      | <b>Nucleus</b> 1H                     | <b>Number of Transients</b> 8          |
| <b>Origin</b> ECA 600                                        | <b>Original Points Count</b> 32768 | <b>Owner</b> delta                    | <b>Points Count</b> 32768              |
| <b>Receiver Gain</b> 38.00                                   | <b>Solvent</b> DMSO-d6             | <b>Spectrum Offset (Hz)</b> 5423.2422 | <b>Sweep Width (Hz)</b> 16534.39       |

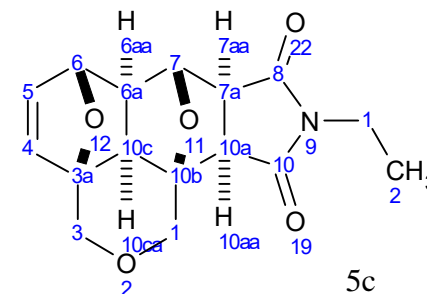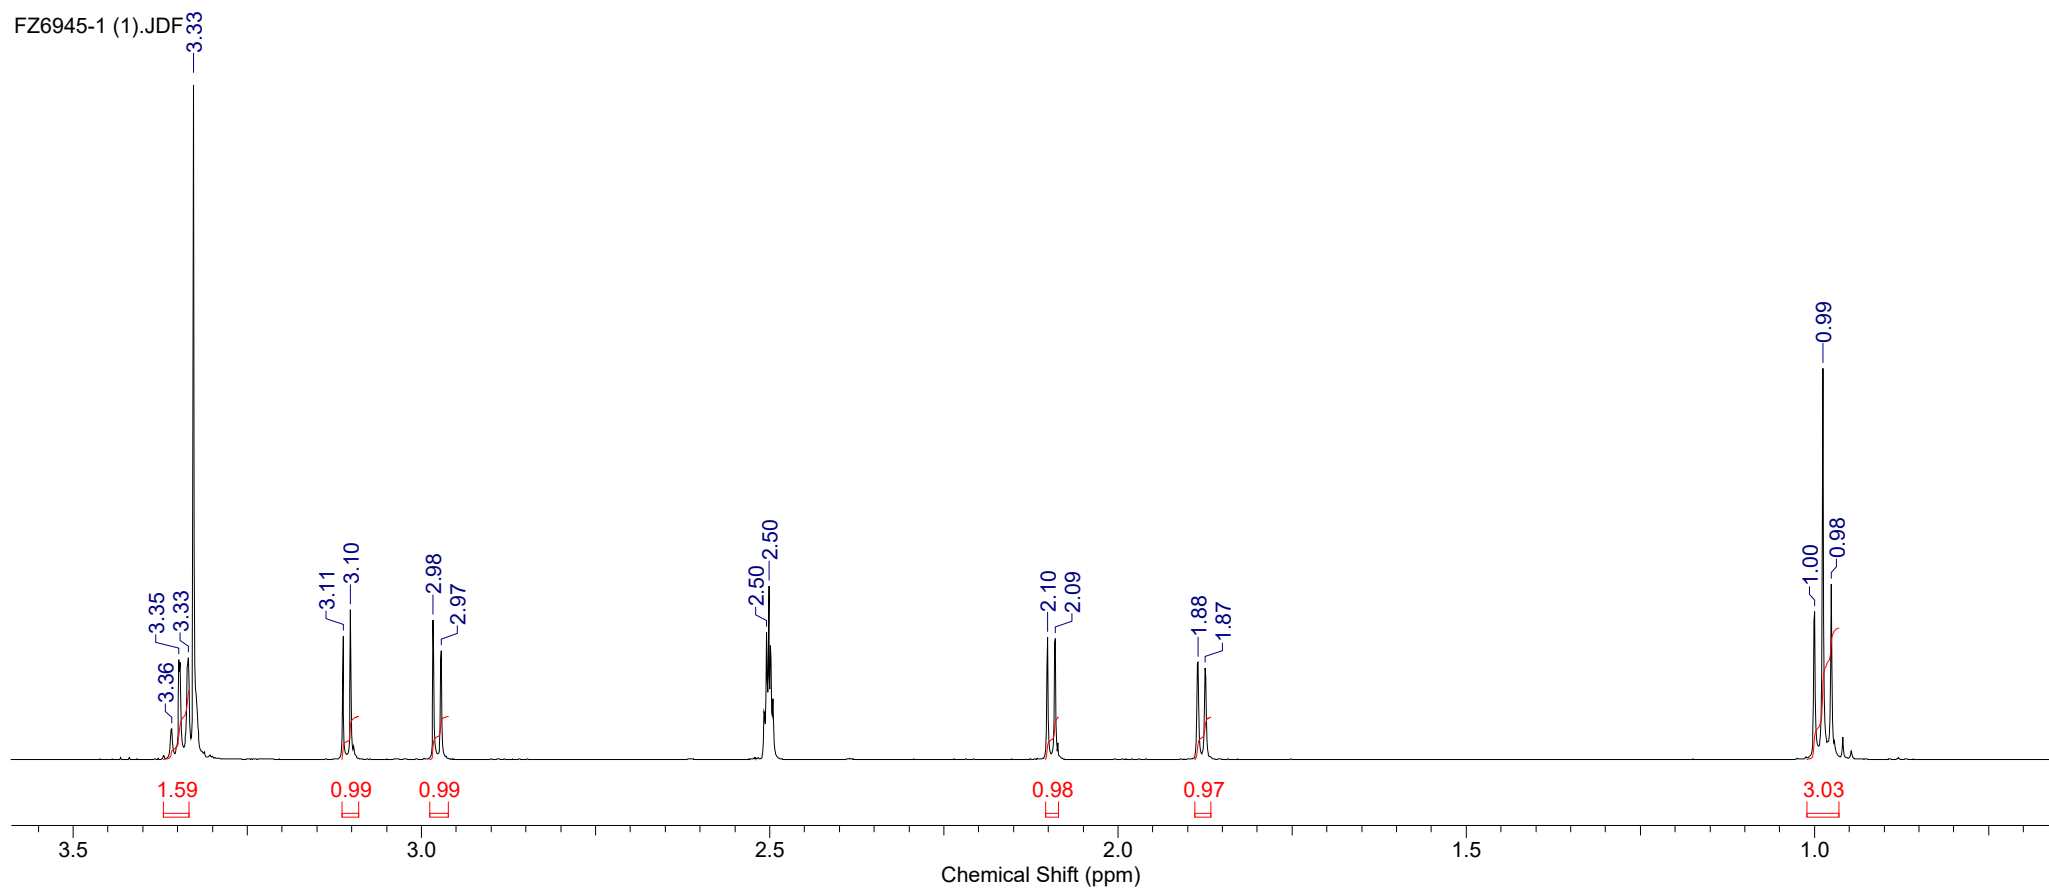

|                                                                |                    |
|----------------------------------------------------------------|--------------------|
| <b>Formula</b> C <sub>16</sub> H <sub>17</sub> NO <sub>5</sub> | <b>FW</b> 303.3099 |
|----------------------------------------------------------------|--------------------|

|                                        |                                                                  |                                        |
|----------------------------------------|------------------------------------------------------------------|----------------------------------------|
| <b>Acquisition Time (sec)</b> 0.6921   | <b>Comment</b> single pulse decoupled gated NOE                  | <b>Date</b> 03 Feb 1990 16:11:49       |
| <b>Date Stamp</b> 22 Nov 2018 12:00:29 | <b>File Name</b> C:\USERS\534~1\APPPDATA\LOCAL\TEMP\FZ6976-1.JDF |                                        |
| <b>Frequency (MHz)</b> 150.91          | <b>Nucleus</b> 13C                                               | <b>Number of Transients</b> 400        |
| <b>Original Points Count</b> 32768     | <b>Owner</b> delta                                               | <b>Points Count</b> 32768              |
| <b>Receiver Gain</b> 56.00             | <b>Solvent</b> DMSO-d6                                           | <b>Pulse Sequence</b> single pulse dec |
|                                        | <b>Spectrum Offset (Hz)</b> 15091.3428                           | <b>Sweep Width (Hz)</b> 47348.49       |

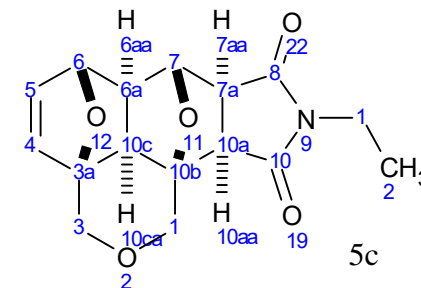

FZ6976-1.JDF

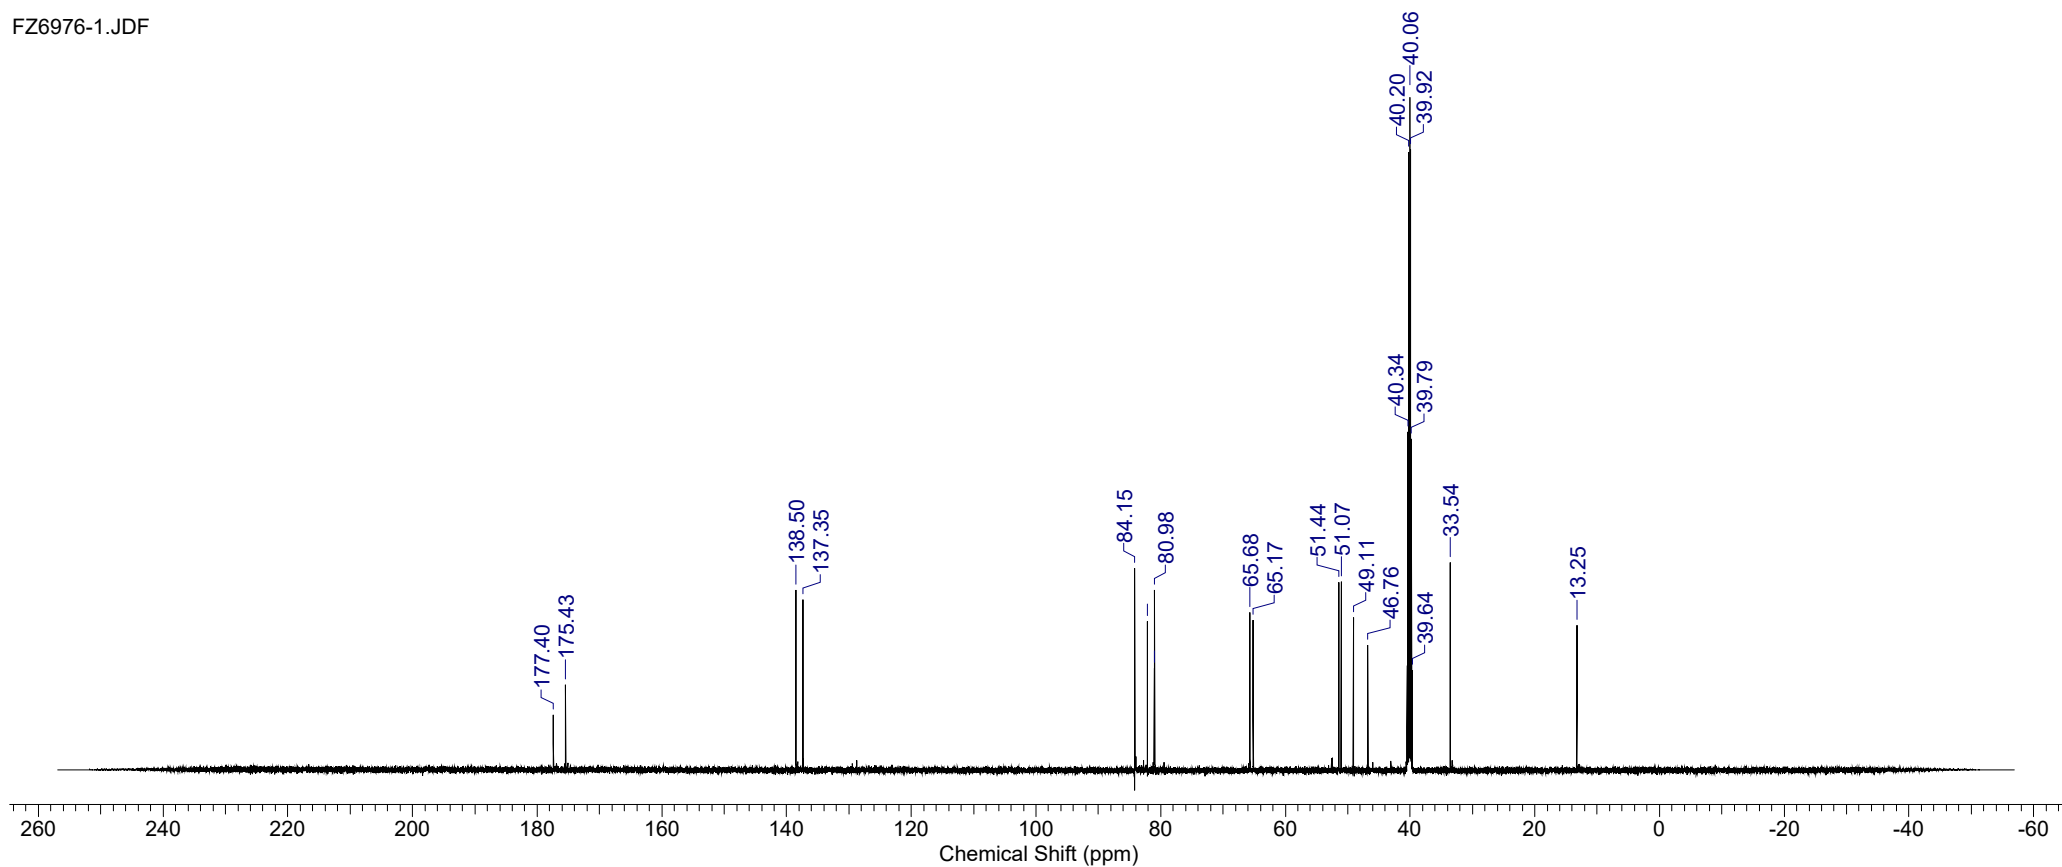

|                                                                |                    |
|----------------------------------------------------------------|--------------------|
| <b>Formula</b> C <sub>16</sub> H <sub>17</sub> NO <sub>5</sub> | <b>FW</b> 303.3099 |
|----------------------------------------------------------------|--------------------|

|                                        |                                                                 |                                        |
|----------------------------------------|-----------------------------------------------------------------|----------------------------------------|
| <b>Acquisition Time (sec)</b> 0.6921   | <b>Comment</b> single pulse decoupled gated NOE                 | <b>Date</b> 03 Feb 1990 16:11:49       |
| <b>Date Stamp</b> 22 Nov 2018 12:00:29 | <b>File Name</b> C:\USERS\534~1\APPDATA\LOCAL\TEMP\FZ6976-1.JDF |                                        |
| <b>Frequency (MHz)</b> 150.91          | <b>Nucleus</b> 13C                                              | <b>Number of Transients</b> 400        |
| <b>Original Points Count</b> 32768     | <b>Owner</b> delta                                              | <b>Points Count</b> 32768              |
| <b>Receiver Gain</b> 56.00             | <b>Solvent</b> DMSO-d6                                          | <b>Points Count</b> 32768              |
|                                        | <b>Spectrum Offset (Hz)</b> 15091.3428                          | <b>Pulse Sequence</b> single pulse dec |
|                                        |                                                                 | <b>Sweep Width (Hz)</b> 47348.49       |

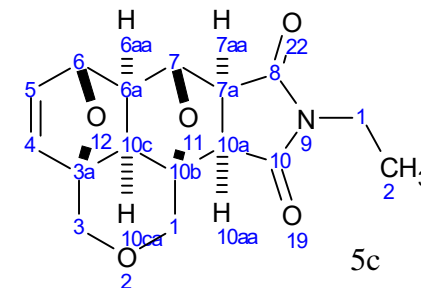

FZ6976-1.JDF

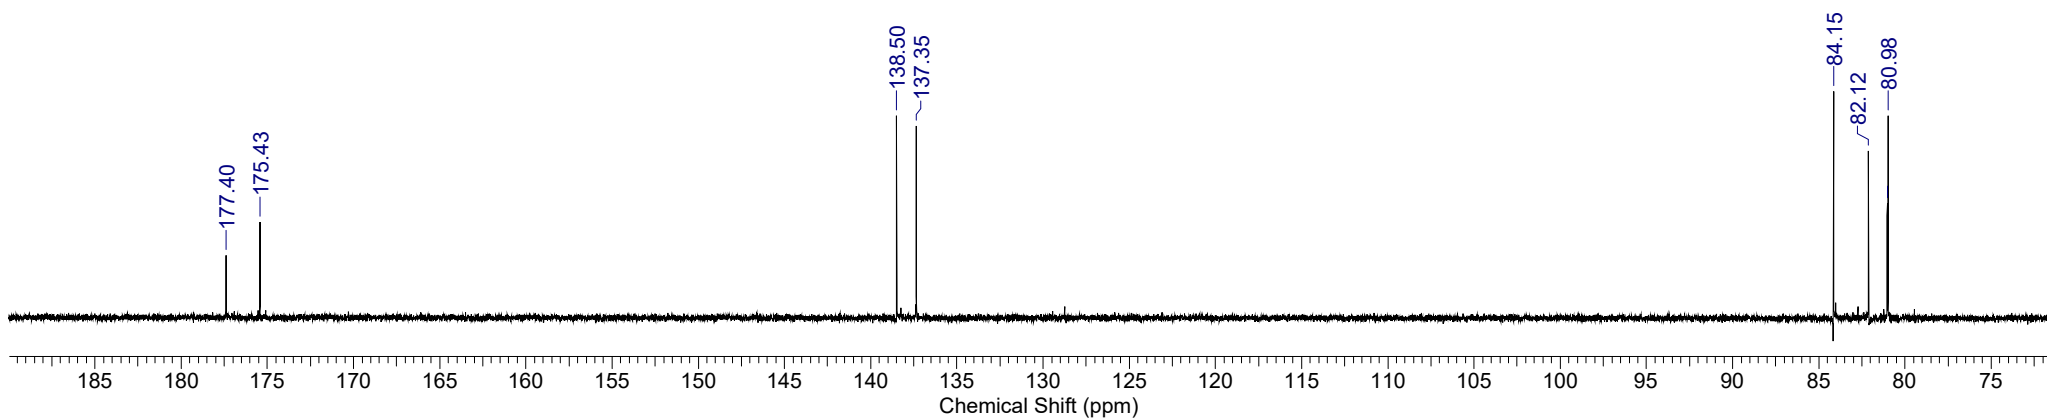

|                                                                |                    |
|----------------------------------------------------------------|--------------------|
| <b>Formula</b> C <sub>16</sub> H <sub>17</sub> NO <sub>5</sub> | <b>FW</b> 303.3099 |
|----------------------------------------------------------------|--------------------|

|                                        |                                                                  |                                        |
|----------------------------------------|------------------------------------------------------------------|----------------------------------------|
| <b>Acquisition Time (sec)</b> 0.6921   | <b>Comment</b> single pulse decoupled gated NOE                  | <b>Date</b> 03 Feb 1990 16:11:49       |
| <b>Date Stamp</b> 22 Nov 2018 12:00:29 | <b>File Name</b> C:\USERS\534~1\APPPDATA\LOCAL\TEMP\FZ6976-1.JDF |                                        |
| <b>Frequency (MHz)</b> 150.91          | <b>Nucleus</b> 13C                                               | <b>Number of Transients</b> 400        |
| <b>Original Points Count</b> 32768     | <b>Owner</b> delta                                               | <b>Points Count</b> 32768              |
| <b>Receiver Gain</b> 56.00             | <b>Solvent</b> DMSO-d6                                           | <b>Spectrum Offset (Hz)</b> 15091.3428 |
|                                        |                                                                  | <b>Sweep Width (Hz)</b> 47348.49       |

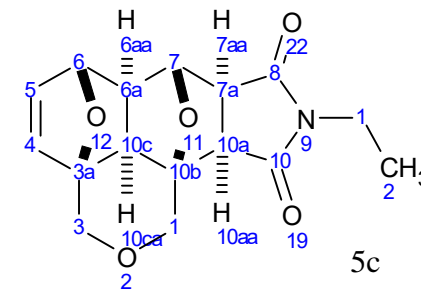

FZ6976-1.JDF

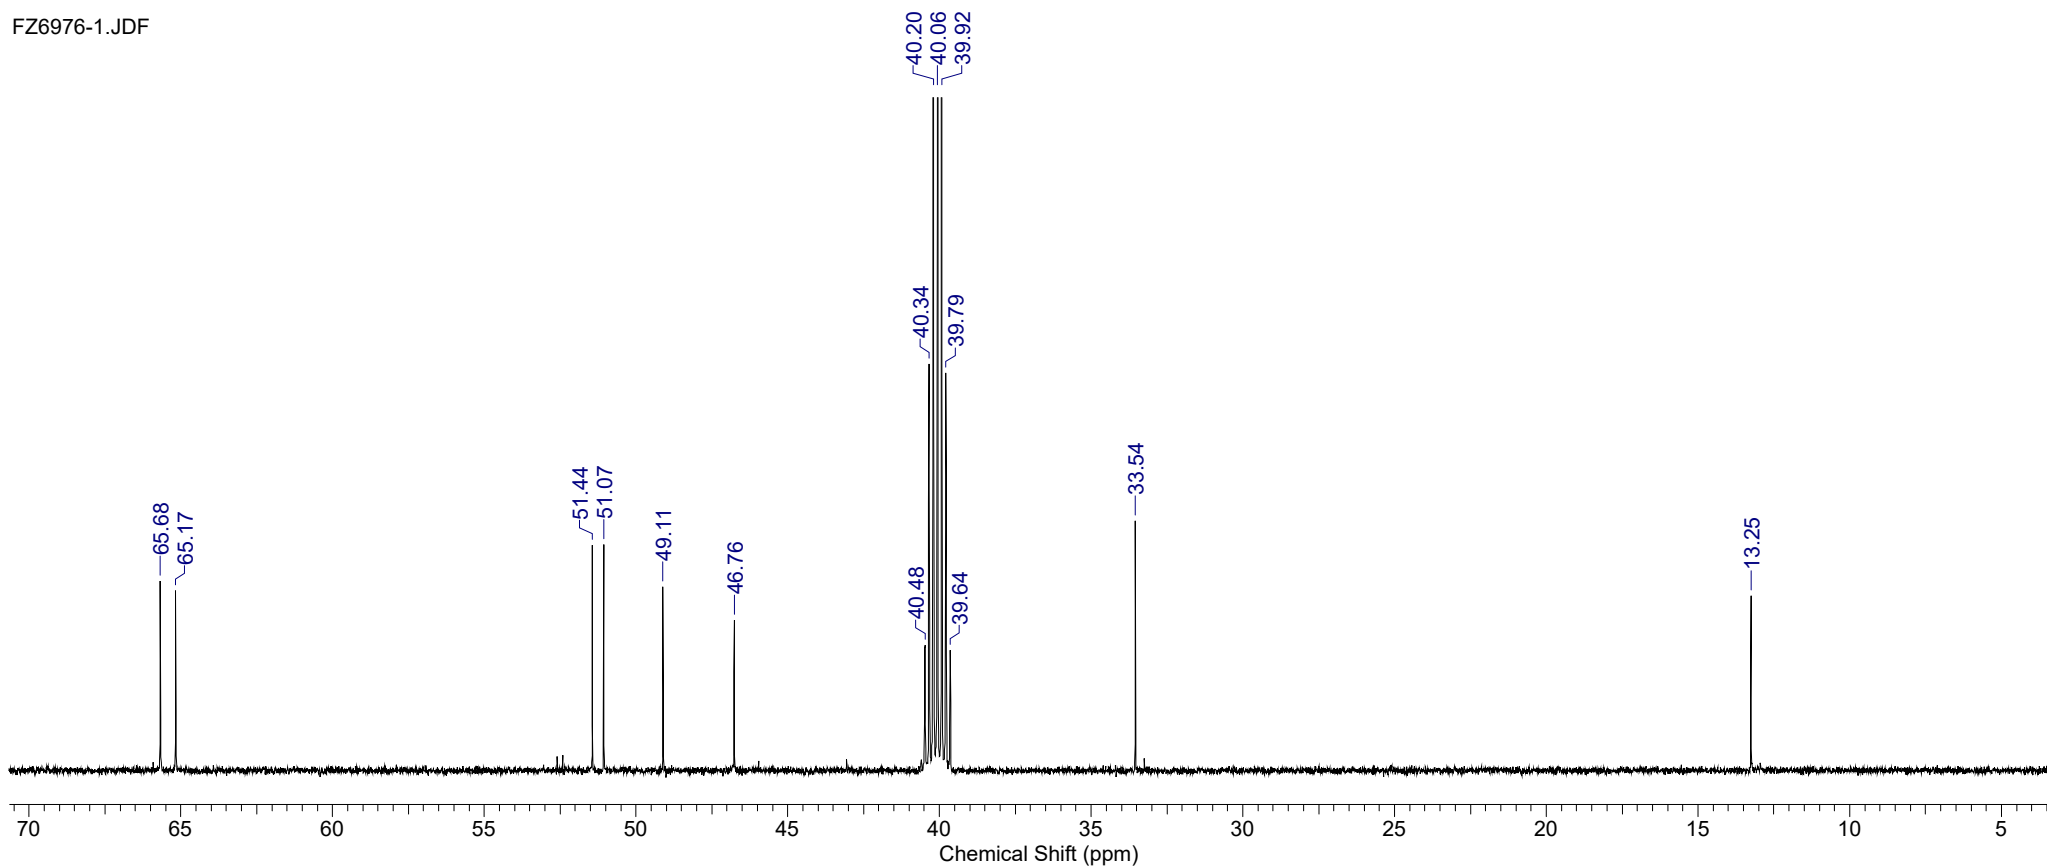

|                                                                  |                    |
|------------------------------------------------------------------|--------------------|
| <b>Formula</b> C <sub>16</sub> H <sub>17</sub> NO <sub>4</sub> S | <b>FW</b> 319.3755 |
|------------------------------------------------------------------|--------------------|

|                                                          |                                    |                                       |                                        |
|----------------------------------------------------------|------------------------------------|---------------------------------------|----------------------------------------|
| <b>Acquisition Time (sec)</b> 1.9818                     | <b>Comment</b> single pulse        | <b>Date</b> 11 Jul 2020 09:37:16      | <b>Date Stamp</b> 11 Jul 2020 09:38:54 |
| <b>File Name</b> C:\USERS\Лабa534\DOWNLOADS\FZ8765-1.JDF | <b>Frequency (MHz)</b> 600.17      | <b>Nucleus</b> 1H                     | <b>Number of Transients</b> 8          |
| <b>Origin</b> ECA 600                                    | <b>Original Points Count</b> 32768 | <b>Owner</b> CKP                      | <b>Points Count</b> 32768              |
| <b>Receiver Gain</b> 36.00                               | <b>Solvent</b> DMSO-d6             | <b>Spectrum Offset (Hz)</b> 5423.9868 | <b>Sweep Width (Hz)</b> 16534.39       |
|                                                          |                                    | <b>Temperature (degree C)</b> 28.200  |                                        |

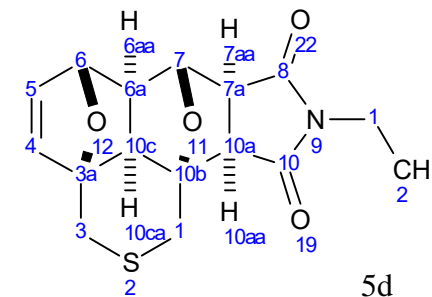

FZ8765-1.JDF

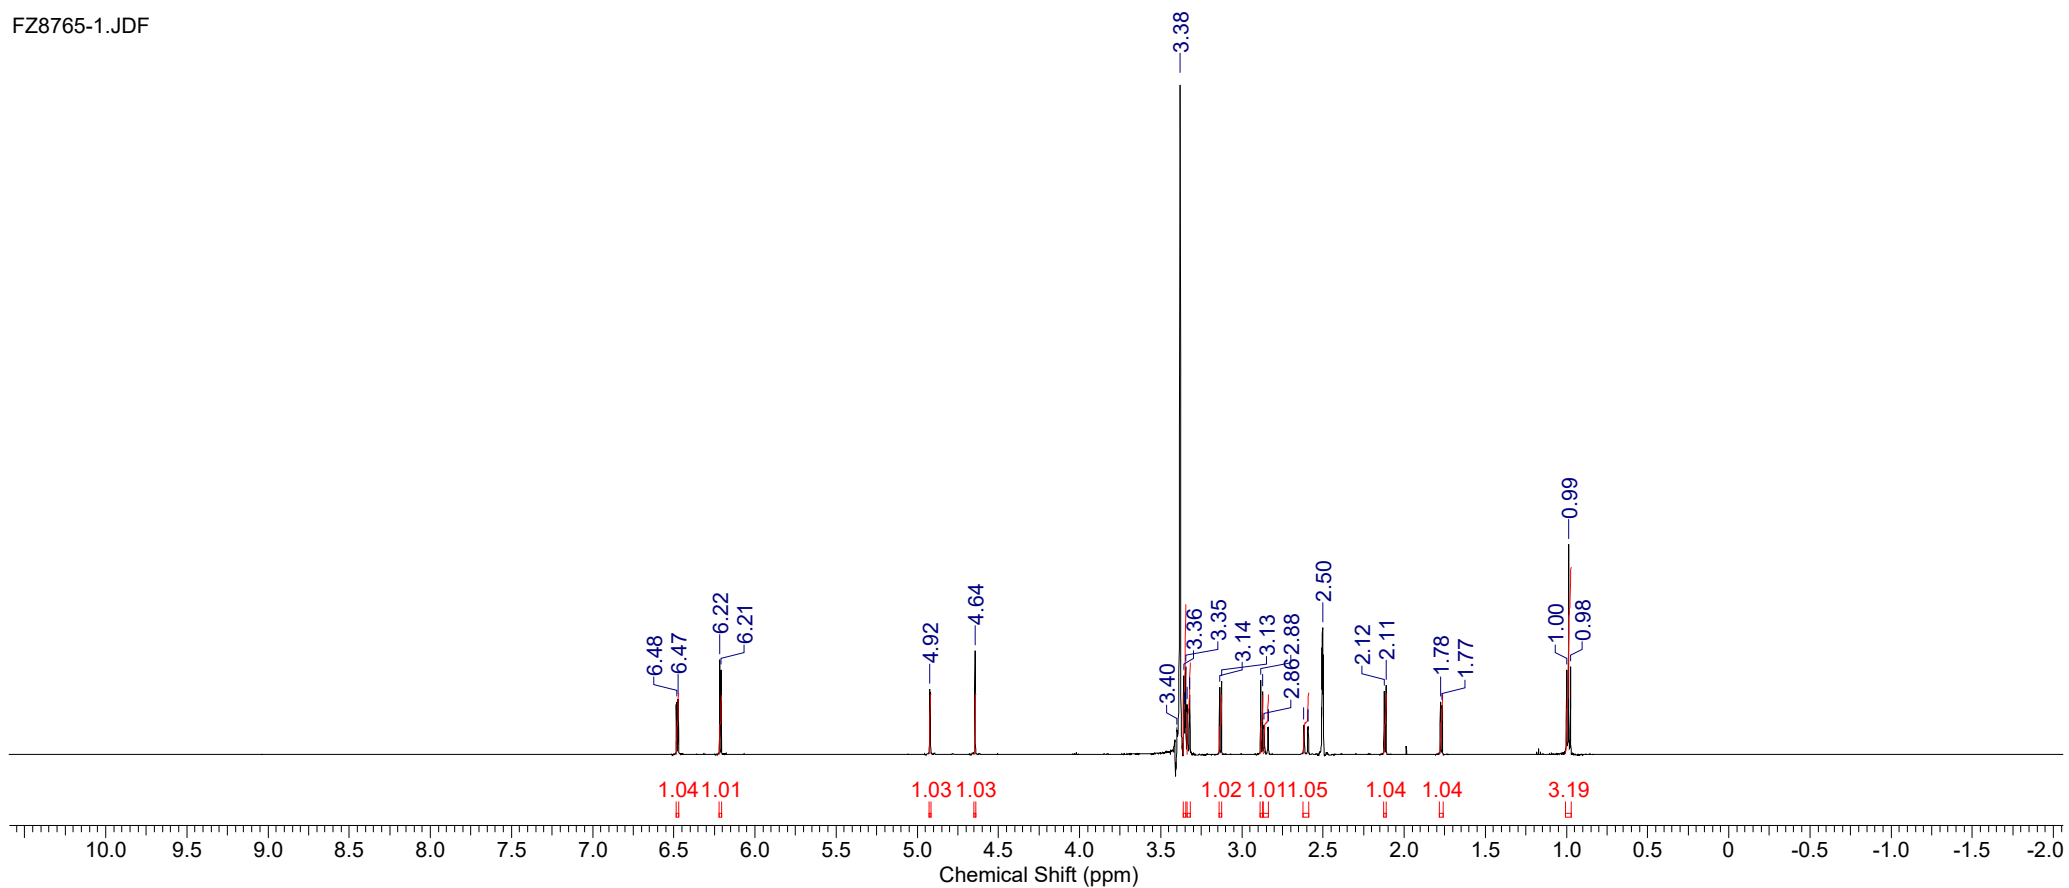

|                                                                  |                    |
|------------------------------------------------------------------|--------------------|
| <b>Formula</b> C <sub>16</sub> H <sub>17</sub> NO <sub>4</sub> S | <b>FW</b> 319.3755 |
|------------------------------------------------------------------|--------------------|

|                                                          |                                    |                                       |                                        |
|----------------------------------------------------------|------------------------------------|---------------------------------------|----------------------------------------|
| <b>Acquisition Time (sec)</b> 1.9818                     | <b>Comment</b> single_pulse        | <b>Date</b> 11 Jul 2020 09:37:16      | <b>Date Stamp</b> 11 Jul 2020 09:38:54 |
| <b>File Name</b> C:\USERS\Лабa534\DOWNLOADS\FZ8765-1.JDF | <b>Frequency (MHz)</b> 600.17      | <b>Nucleus</b> 1H                     | <b>Number of Transients</b> 8          |
| <b>Origin</b> ECA 600                                    | <b>Original Points Count</b> 32768 | <b>Owner</b> CKP                      | <b>Points Count</b> 32768              |
| <b>Receiver Gain</b> 36.00                               | <b>Solvent</b> DMSO-d6             | <b>Spectrum Offset (Hz)</b> 5423.9868 | <b>Sweep Width (Hz)</b> 16534.39       |
|                                                          |                                    |                                       | <b>Temperature (degree C)</b> 28.200   |

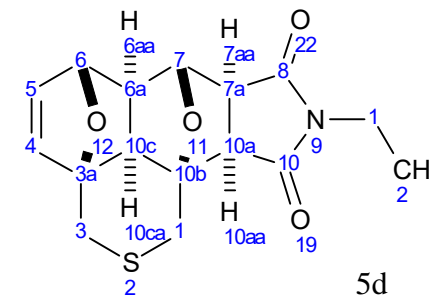

FZ8765-1.JDF

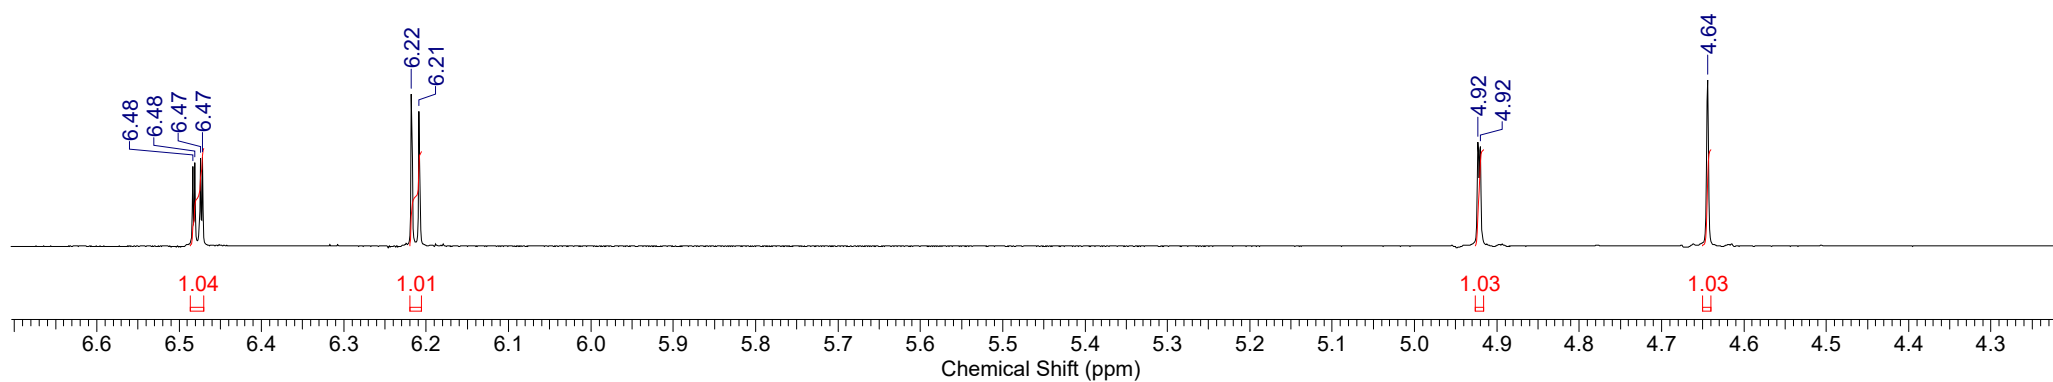

|                                                                  |                    |
|------------------------------------------------------------------|--------------------|
| <b>Formula</b> C <sub>16</sub> H <sub>17</sub> NO <sub>4</sub> S | <b>FW</b> 319.3755 |
|------------------------------------------------------------------|--------------------|

|                                                          |                                    |                                       |                                        |
|----------------------------------------------------------|------------------------------------|---------------------------------------|----------------------------------------|
| <b>Acquisition Time (sec)</b> 1.9818                     | <b>Comment</b> single pulse        | <b>Date</b> 11 Jul 2020 09:37:16      | <b>Date Stamp</b> 11 Jul 2020 09:38:54 |
| <b>File Name</b> C:\USERS\Лабa534\DOWNLOADS\FZ8765-1.JDF | <b>Frequency (MHz)</b> 600.17      | <b>Nucleus</b> 1H                     | <b>Number of Transients</b> 8          |
| <b>Origin</b> ECA 600                                    | <b>Original Points Count</b> 32768 | <b>Owner</b> CKP                      | <b>Points Count</b> 32768              |
| <b>Receiver Gain</b> 36.00                               | <b>Solvent</b> DMSO-d6             | <b>Spectrum Offset (Hz)</b> 5423.9868 | <b>Sweep Width (Hz)</b> 16534.39       |
|                                                          |                                    |                                       | <b>Temperature (degree C)</b> 28.200   |

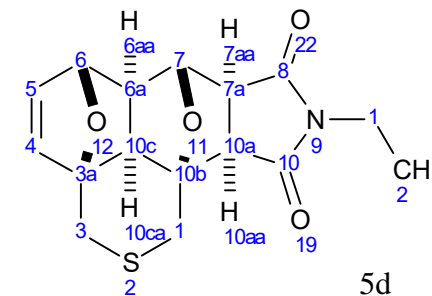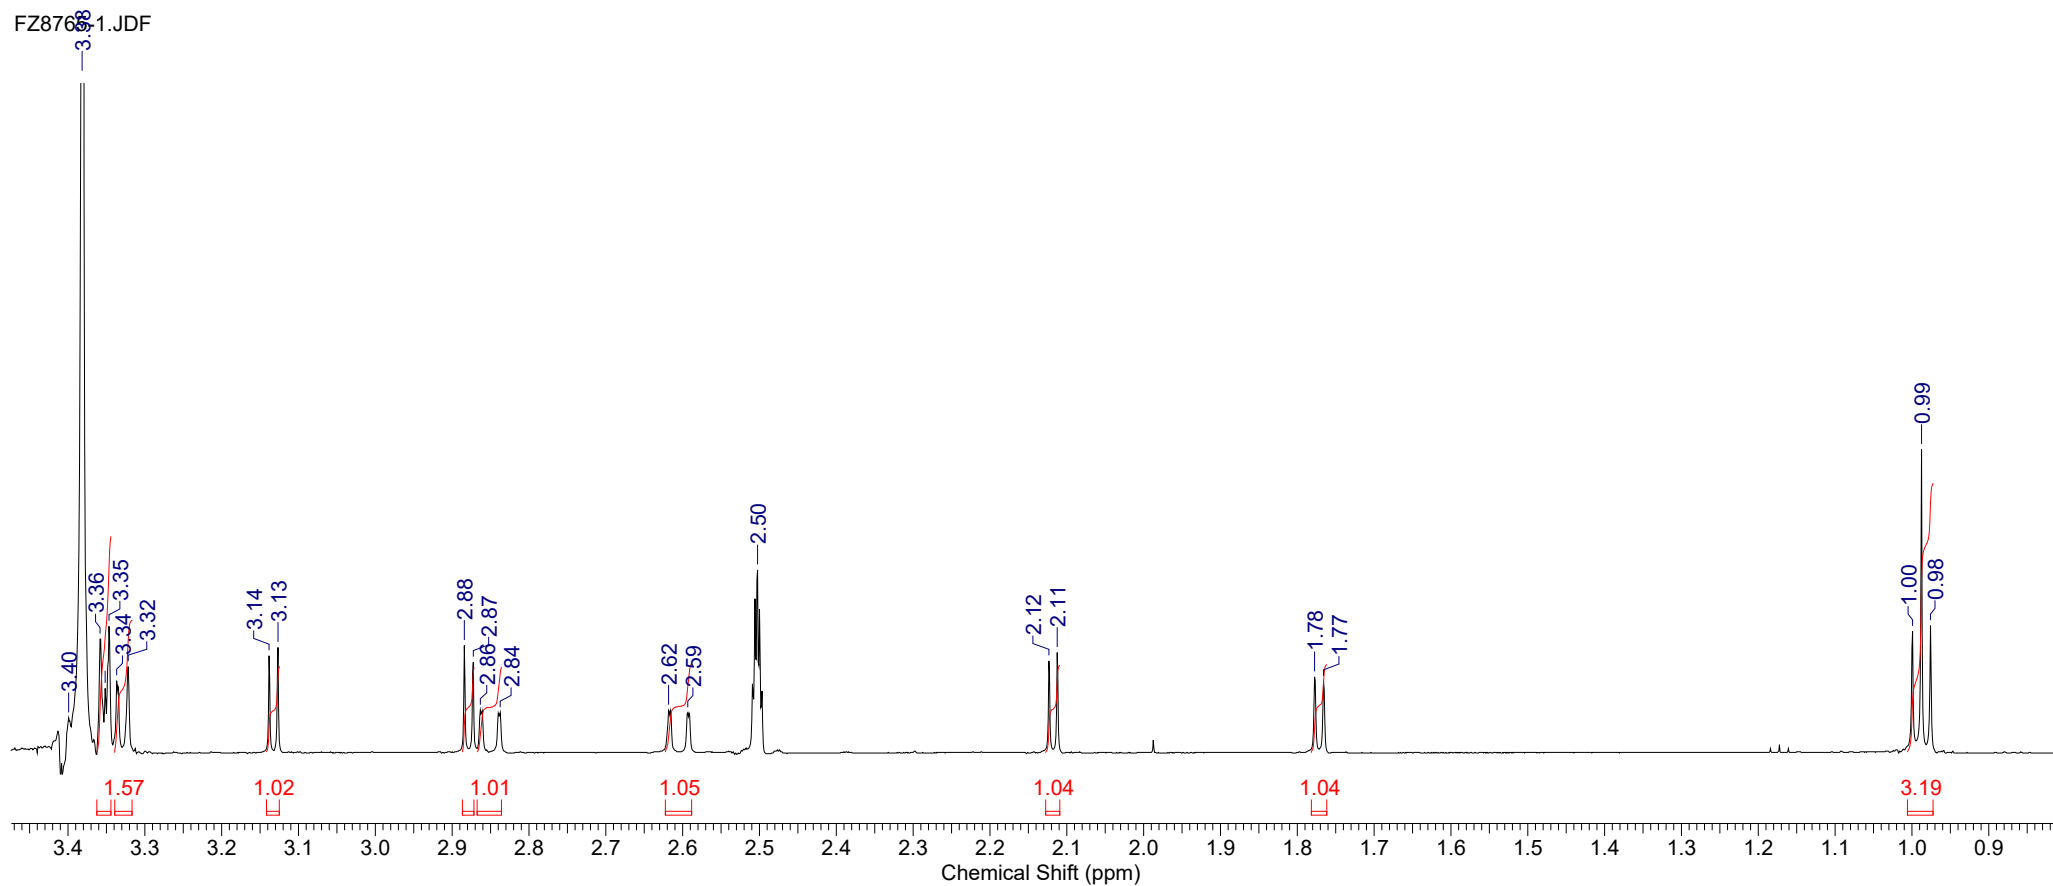



|                                                                  |                    |
|------------------------------------------------------------------|--------------------|
| <b>Formula</b> C <sub>16</sub> H <sub>17</sub> NO <sub>4</sub> S | <b>FW</b> 319.3755 |
|------------------------------------------------------------------|--------------------|

|                                        |                                                           |                                        |
|----------------------------------------|-----------------------------------------------------------|----------------------------------------|
| <b>Acquisition Time (sec)</b> 0.6921   | <b>Comment</b> single pulse decoupled gated NOE           | <b>Date</b> 15 Jul 2020 04:52:03       |
| <b>Date Stamp</b> 15 Jul 2020 04:53:48 | <b>File Name</b> C:\USERS\Jla6a534\DOWNLOADS\FZ8765-2.JDF |                                        |
| <b>Frequency (MHz)</b> 150.91          | <b>Nucleus</b> 13C                                        | <b>Number of Transients</b> 4000       |
| <b>Original Points Count</b> 32768     | <b>Owner</b> CKP                                          | <b>Origin</b> ECA 600                  |
| <b>Receiver Gain</b> 58.00             | <b>Solvent</b> DMSO-d6                                    | <b>Points Count</b> 32768              |
| <b>Temperature (degree C)</b> 48.800   | <b>Spectrum Offset (Hz)</b> 15091.3428                    | <b>Pulse Sequence</b> single pulse dec |
|                                        |                                                           | <b>Sweep Width (Hz)</b> 47348.49       |

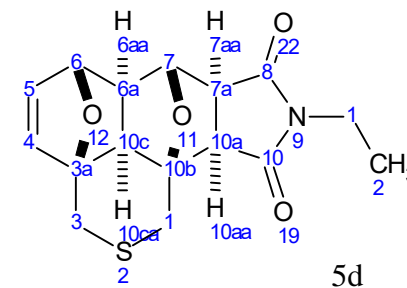

FZ8765-2.ESP

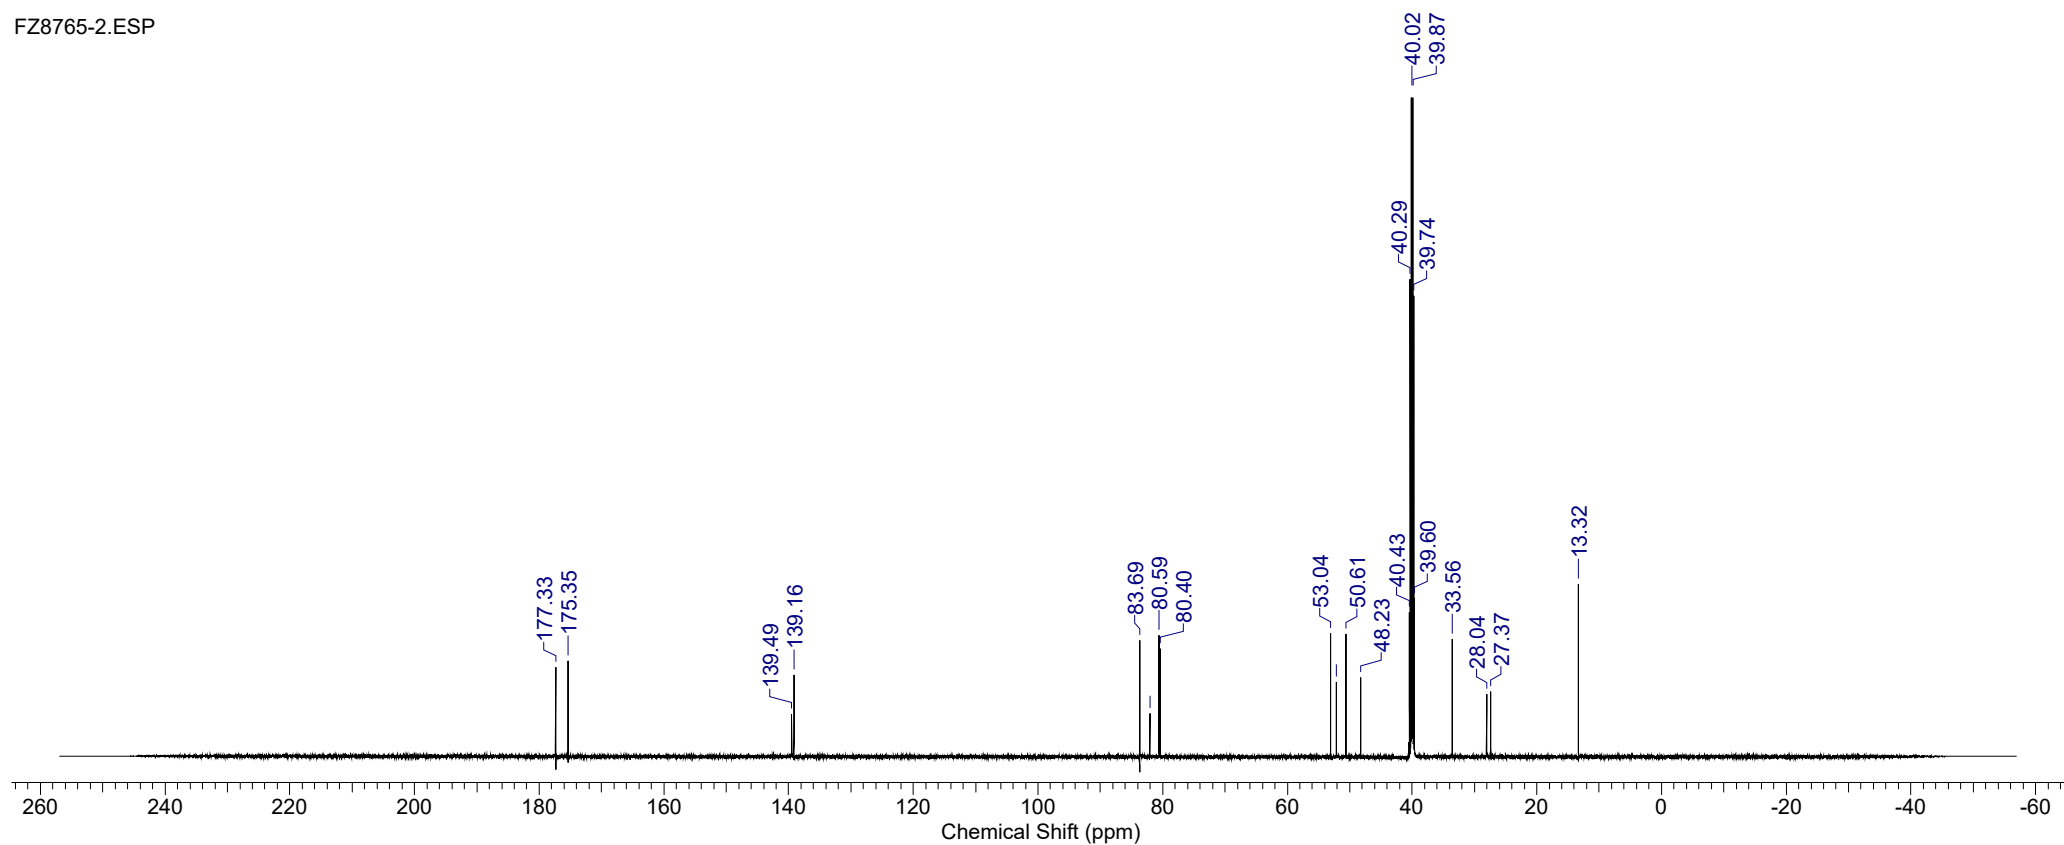

|                                                                  |                    |
|------------------------------------------------------------------|--------------------|
| <b>Formula</b> C <sub>16</sub> H <sub>17</sub> NO <sub>4</sub> S | <b>FW</b> 319.3755 |
|------------------------------------------------------------------|--------------------|

|                                        |                                                           |                                        |
|----------------------------------------|-----------------------------------------------------------|----------------------------------------|
| <b>Acquisition Time (sec)</b> 0.6921   | <b>Comment</b> single pulse decoupled gated NOE           | <b>Date</b> 15 Jul 2020 04:52:03       |
| <b>Date Stamp</b> 15 Jul 2020 04:53:48 | <b>File Name</b> C:\USERS\lta6a534\DOWNLOADS\FZ8765-2.JDF |                                        |
| <b>Frequency (MHz)</b> 150.91          | <b>Nucleus</b> 13C                                        | <b>Number of Transients</b> 4000       |
| <b>Original Points Count</b> 32768     | <b>Owner</b> CKP                                          | <b>Origin</b> ECA 600                  |
| <b>Receiver Gain</b> 58.00             | <b>Solvent</b> DMSO-d6                                    | <b>Points Count</b> 32768              |
| <b>Temperature (degree C)</b> 48.800   | <b>Spectrum Offset (Hz)</b> 15091.3428                    | <b>Pulse Sequence</b> single pulse dec |
|                                        |                                                           | <b>Sweep Width (Hz)</b> 47348.49       |

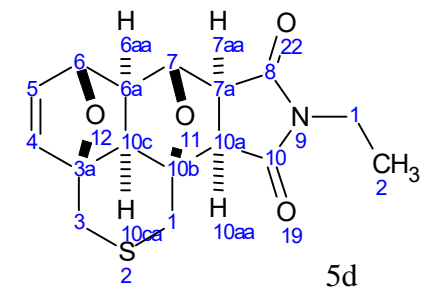

FZ8765-2.ESP

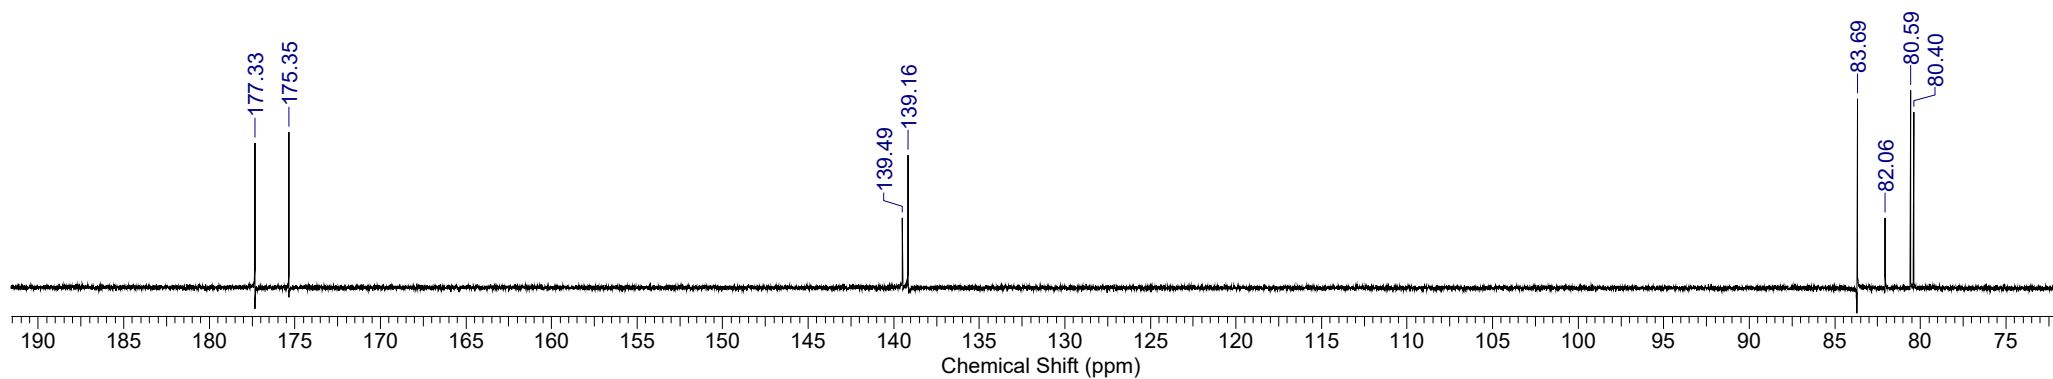

|                                                                  |                    |
|------------------------------------------------------------------|--------------------|
| <b>Formula</b> C <sub>16</sub> H <sub>17</sub> NO <sub>4</sub> S | <b>FW</b> 319.3755 |
|------------------------------------------------------------------|--------------------|

|                                        |                                                           |                                        |
|----------------------------------------|-----------------------------------------------------------|----------------------------------------|
| <b>Acquisition Time (sec)</b> 0.6921   | <b>Comment</b> single pulse decoupled gated NOE           | <b>Date</b> 15 Jul 2020 04:52:03       |
| <b>Date Stamp</b> 15 Jul 2020 04:53:48 | <b>File Name</b> C:\USERS\Jla6a534\DOWNLOADS\FZ8765-2.JDF |                                        |
| <b>Frequency (MHz)</b> 150.91          | <b>Nucleus</b> 13C                                        | <b>Number of Transients</b> 4000       |
| <b>Original Points Count</b> 32768     | <b>Owner</b> CKP                                          | <b>Origin</b> ECA 600                  |
| <b>Receiver Gain</b> 58.00             | <b>Solvent</b> DMSO-d6                                    | <b>Points Count</b> 32768              |
| <b>Temperature (degree C)</b> 48.800   | <b>Spectrum Offset (Hz)</b> 15091.3428                    | <b>Pulse Sequence</b> single pulse dec |
|                                        |                                                           | <b>Sweep Width (Hz)</b> 47348.49       |

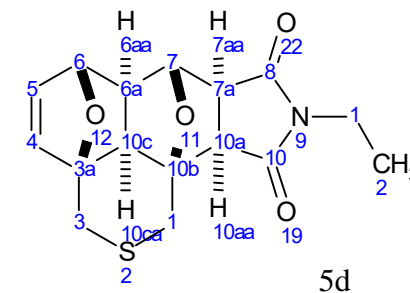

FZ8765-2.ESP

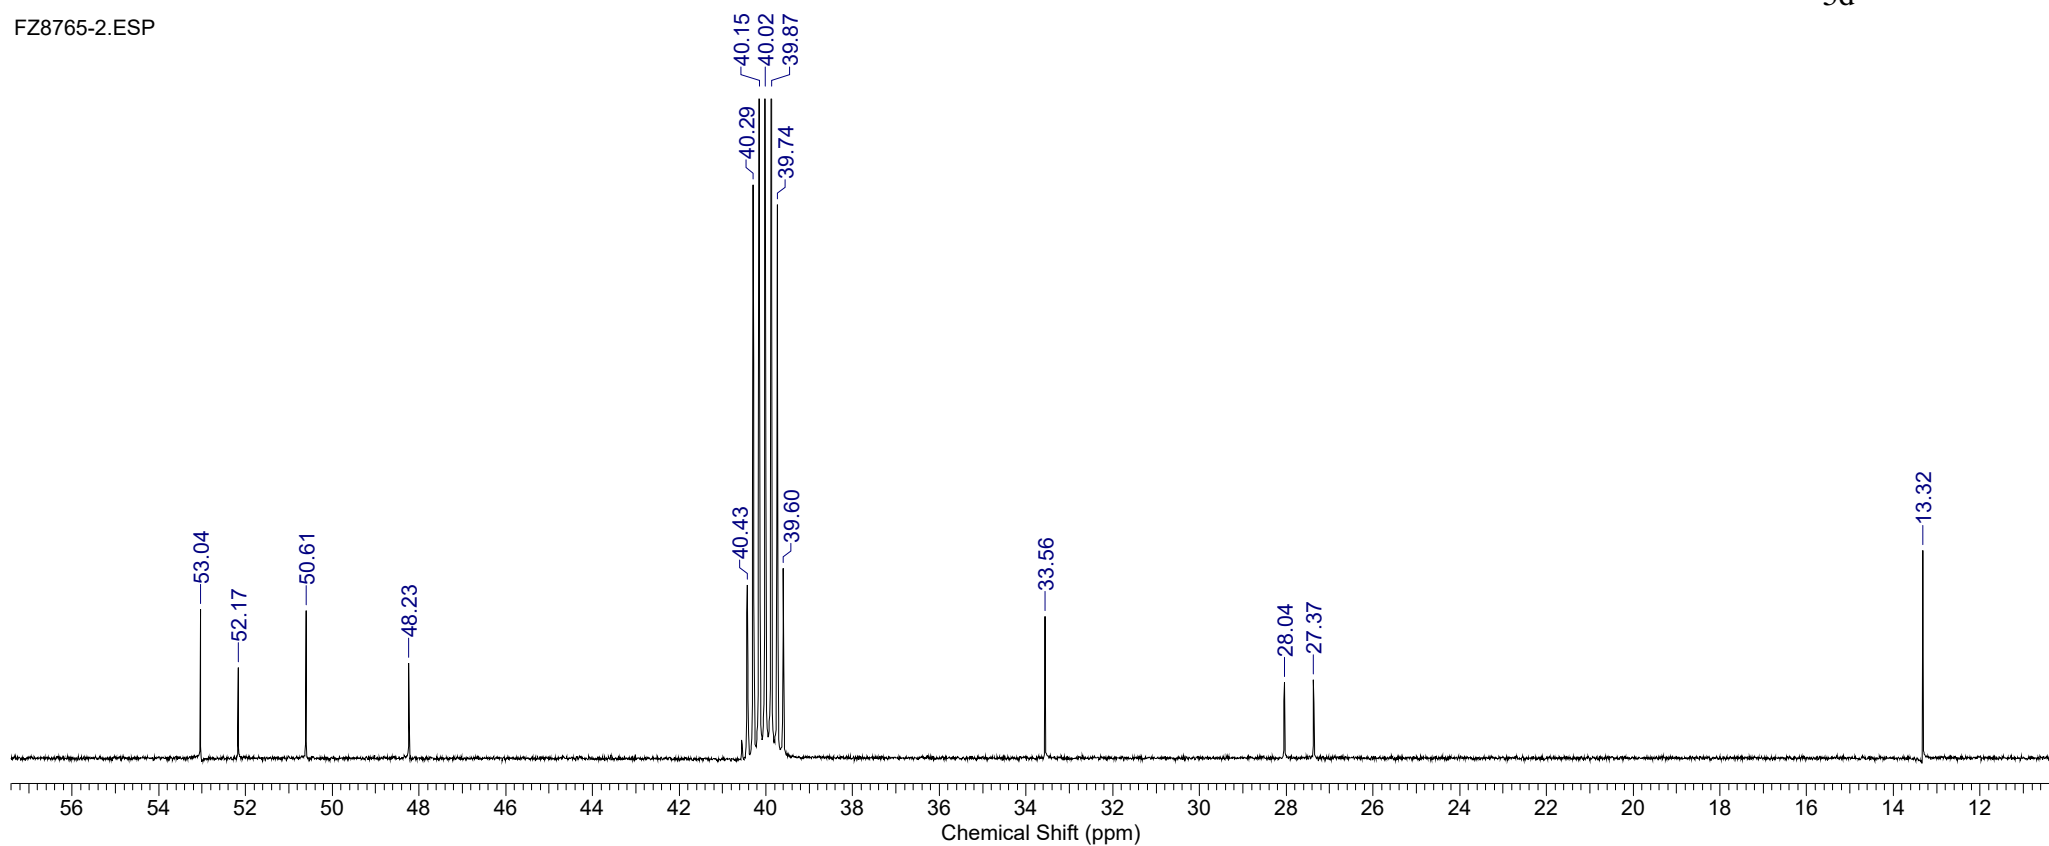

|                                                                  |                    |
|------------------------------------------------------------------|--------------------|
| <b>Formula</b> C <sub>16</sub> H <sub>17</sub> NO <sub>6</sub> S | <b>FW</b> 351.3743 |
|------------------------------------------------------------------|--------------------|

|                                                          |                                    |                                       |                                        |
|----------------------------------------------------------|------------------------------------|---------------------------------------|----------------------------------------|
| <b>Acquisition Time (sec)</b> 1.9818                     | <b>Comment</b> single_pulse        | <b>Date</b> 21 Aug 2020 12:46:12      | <b>Date Stamp</b> 21 Aug 2020 12:47:20 |
| <b>File Name</b> C:\USERS\Лабa534\DOWNLOADS\FZ9035-1.JDF | <b>Frequency (MHz)</b> 600.17      | <b>Nucleus</b> 1H                     | <b>Number of Transients</b> 8          |
| <b>Origin</b> ECA 600                                    | <b>Original Points Count</b> 32768 | <b>Owner</b> CKP                      | <b>Points Count</b> 32768              |
| <b>Receiver Gain</b> 44.00                               | <b>Solvent</b> DMSO-d6             | <b>Spectrum Offset (Hz)</b> 5423.2422 | <b>Sweep Width (Hz)</b> 16534.39       |
|                                                          |                                    | <b>Points Count</b> 32768             | <b>Pulse Sequence</b> single_pulse.ex2 |

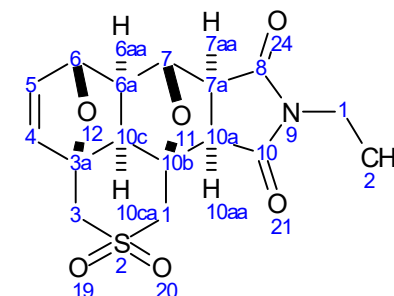

5e

FZ9035-1.ESP

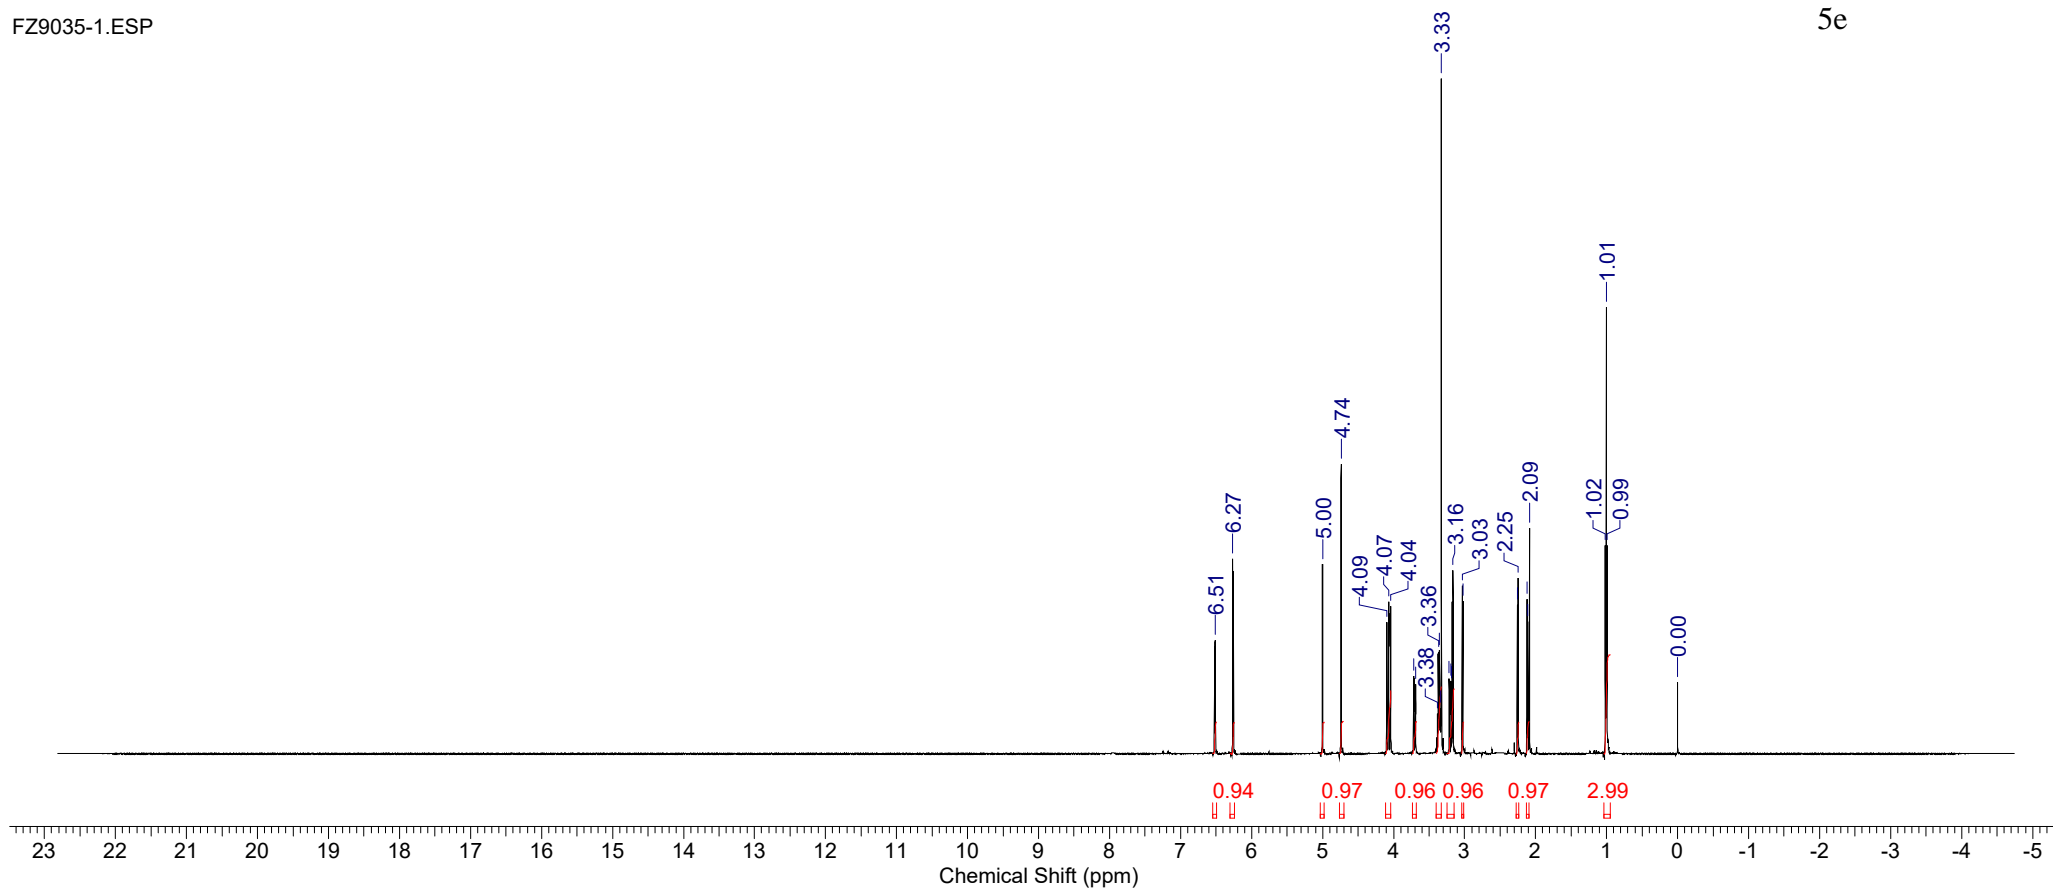

|                                                                  |                    |
|------------------------------------------------------------------|--------------------|
| <b>Formula</b> C <sub>16</sub> H <sub>17</sub> NO <sub>6</sub> S | <b>FW</b> 351.3743 |
|------------------------------------------------------------------|--------------------|

|                                                          |                                    |                                       |                                        |
|----------------------------------------------------------|------------------------------------|---------------------------------------|----------------------------------------|
| <b>Acquisition Time (sec)</b> 1.9818                     | <b>Comment</b> single_pulse        | <b>Date</b> 21 Aug 2020 12:46:12      | <b>Date Stamp</b> 21 Aug 2020 12:47:20 |
| <b>File Name</b> C:\USERS\Лабa534\DOWNLOADS\FZ9035-1.JDF | <b>Frequency (MHz)</b> 600.17      | <b>Nucleus</b> 1H                     | <b>Number of Transients</b> 8          |
| <b>Origin</b> ECA 600                                    | <b>Original Points Count</b> 32768 | <b>Owner</b> CKP                      | <b>Points Count</b> 32768              |
| <b>Receiver Gain</b> 44.00                               | <b>Solvent</b> DMSO-d6             | <b>Spectrum Offset (Hz)</b> 5423.2422 | <b>Sweep Width (Hz)</b> 16534.39       |
|                                                          |                                    | <b>Points Count</b> 32768             | <b>Pulse Sequence</b> single_pulse.ex2 |

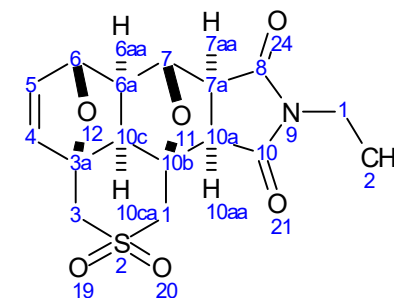

5e

FZ9035-1.ESP

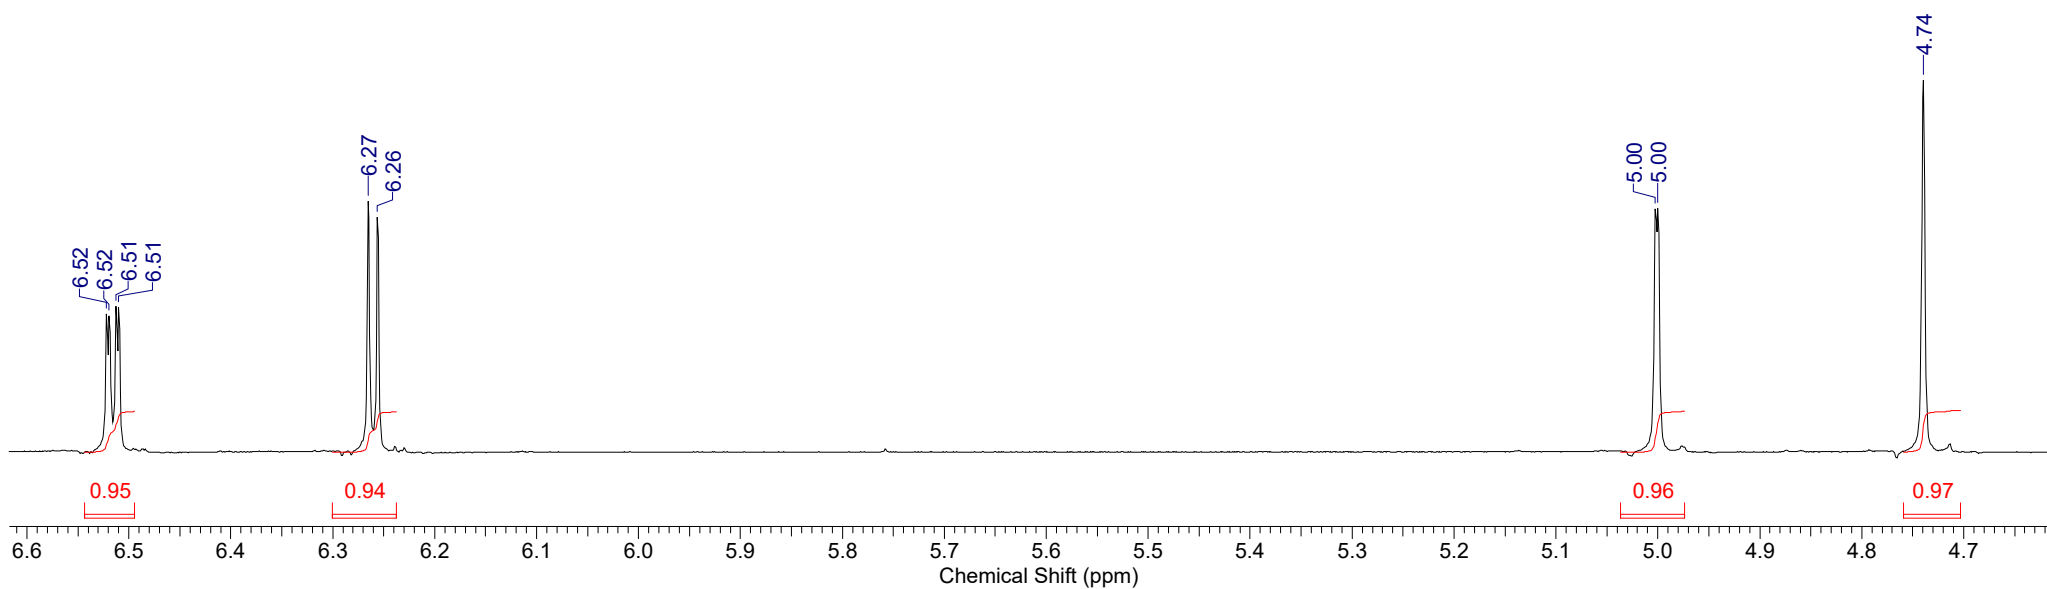

**Formula** C<sub>16</sub>H<sub>17</sub>NO<sub>6</sub>S **FW** 351.3743

|                               |                                         |                              |              |                             |                      |                             |                      |
|-------------------------------|-----------------------------------------|------------------------------|--------------|-----------------------------|----------------------|-----------------------------|----------------------|
| <b>Acquisition Time (sec)</b> | 1.9818                                  | <b>Comment</b>               | single_pulse | <b>Date</b>                 | 21 Aug 2020 12:46:12 | <b>Date Stamp</b>           | 21 Aug 2020 12:47:20 |
| <b>File Name</b>              | C:\USERS\Лабa534\DOWNLOADS\FZ9035-1.JDF | <b>Frequency (MHz)</b>       | 600.17       | <b>Nucleus</b>              | 1H                   | <b>Number of Transients</b> | 8                    |
| <b>Origin</b>                 | ECA 600                                 | <b>Original Points Count</b> | 32768        | <b>Owner</b>                | CKP                  | <b>Points Count</b>         | 32768                |
| <b>Receiver Gain</b>          | 44.00                                   | <b>Solvent</b>               | DMSO-d6      | <b>Spectrum Offset (Hz)</b> | 5423.2422            | <b>Sweep Width (Hz)</b>     | 16534.39             |

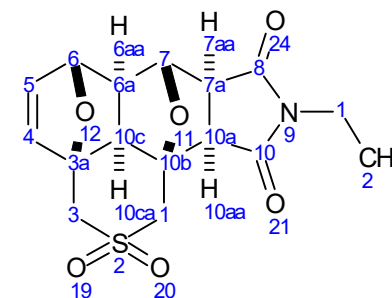

5e

FZ9035-1.ESP

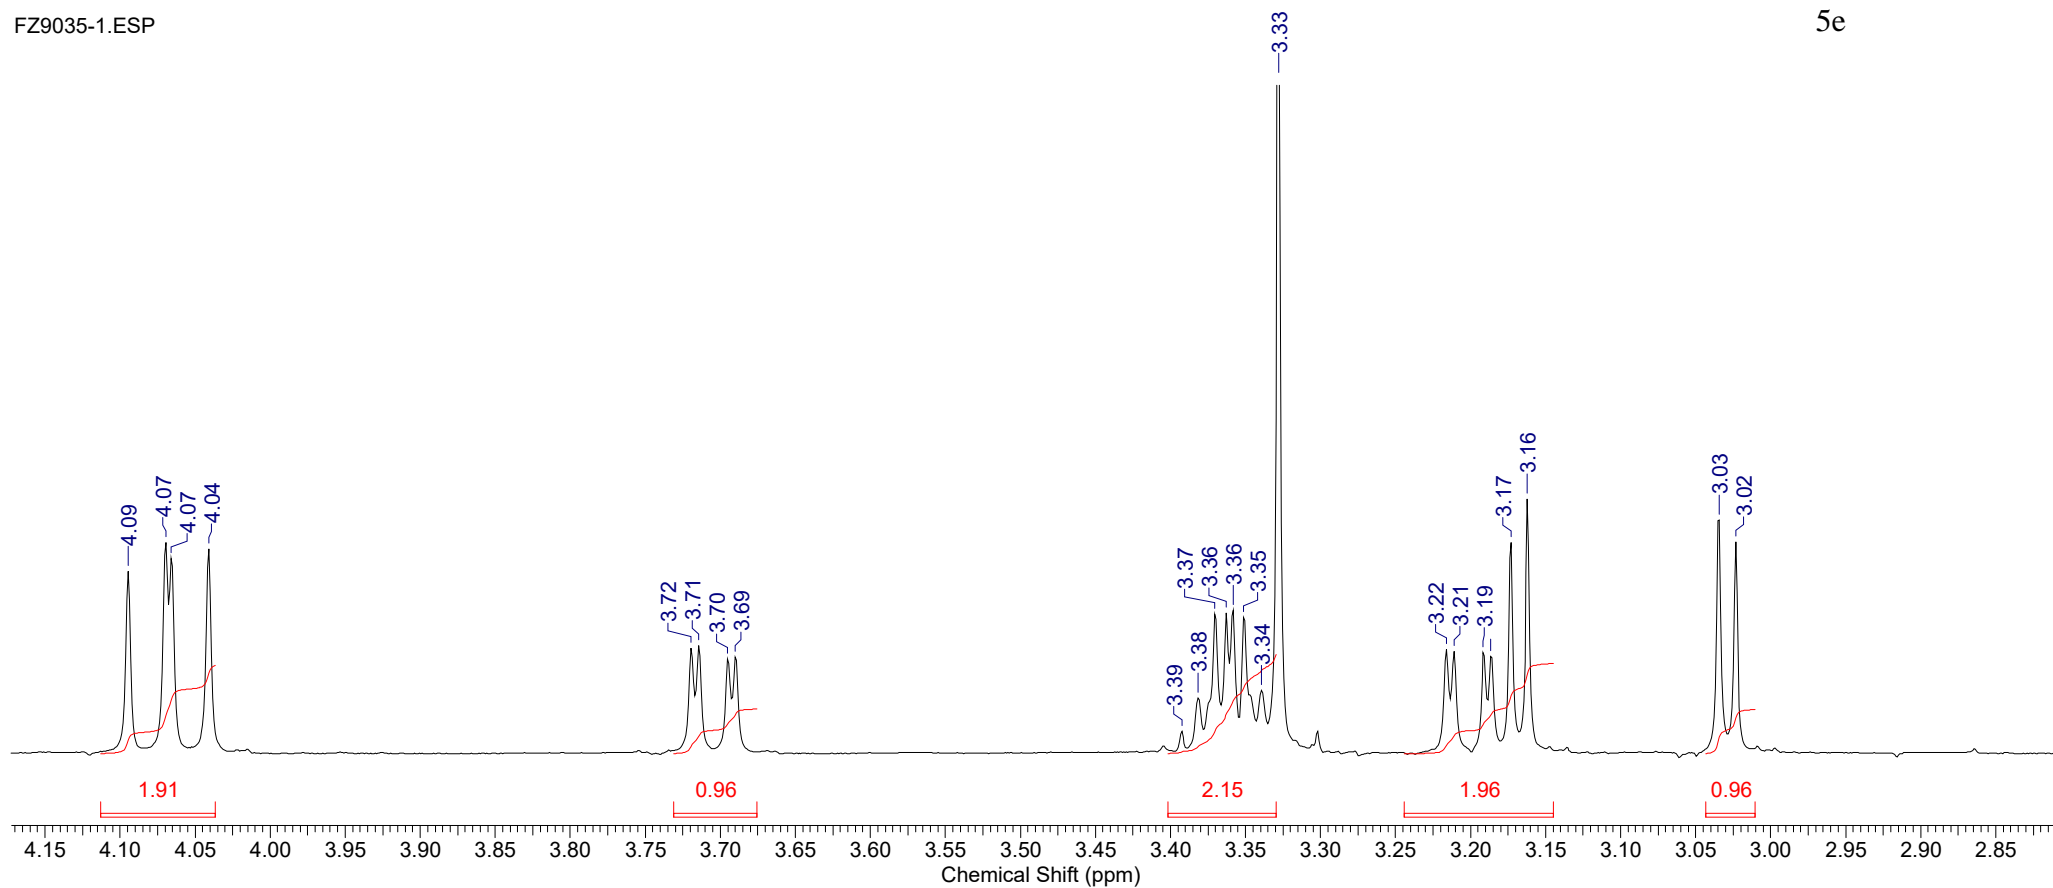

|                                                                  |                    |
|------------------------------------------------------------------|--------------------|
| <b>Formula</b> C <sub>16</sub> H <sub>17</sub> NO <sub>6</sub> S | <b>FW</b> 351.3743 |
|------------------------------------------------------------------|--------------------|

|                                                          |                                    |                                       |                                        |
|----------------------------------------------------------|------------------------------------|---------------------------------------|----------------------------------------|
| <b>Acquisition Time (sec)</b> 1.9818                     | <b>Comment</b> single_pulse        | <b>Date</b> 21 Aug 2020 12:46:12      | <b>Date Stamp</b> 21 Aug 2020 12:47:20 |
| <b>File Name</b> C:\USERS\Лабa534\DOWNLOADS\FZ9035-1.JDF | <b>Frequency (MHz)</b> 600.17      | <b>Nucleus</b> 1H                     | <b>Number of Transients</b> 8          |
| <b>Origin</b> ECA 600                                    | <b>Original Points Count</b> 32768 | <b>Owner</b> CKP                      | <b>Points Count</b> 32768              |
| <b>Receiver Gain</b> 44.00                               | <b>Solvent</b> DMSO-d6             | <b>Spectrum Offset (Hz)</b> 5423.2422 | <b>Sweep Width (Hz)</b> 16534.39       |



5e

FZ9035-1.ESP

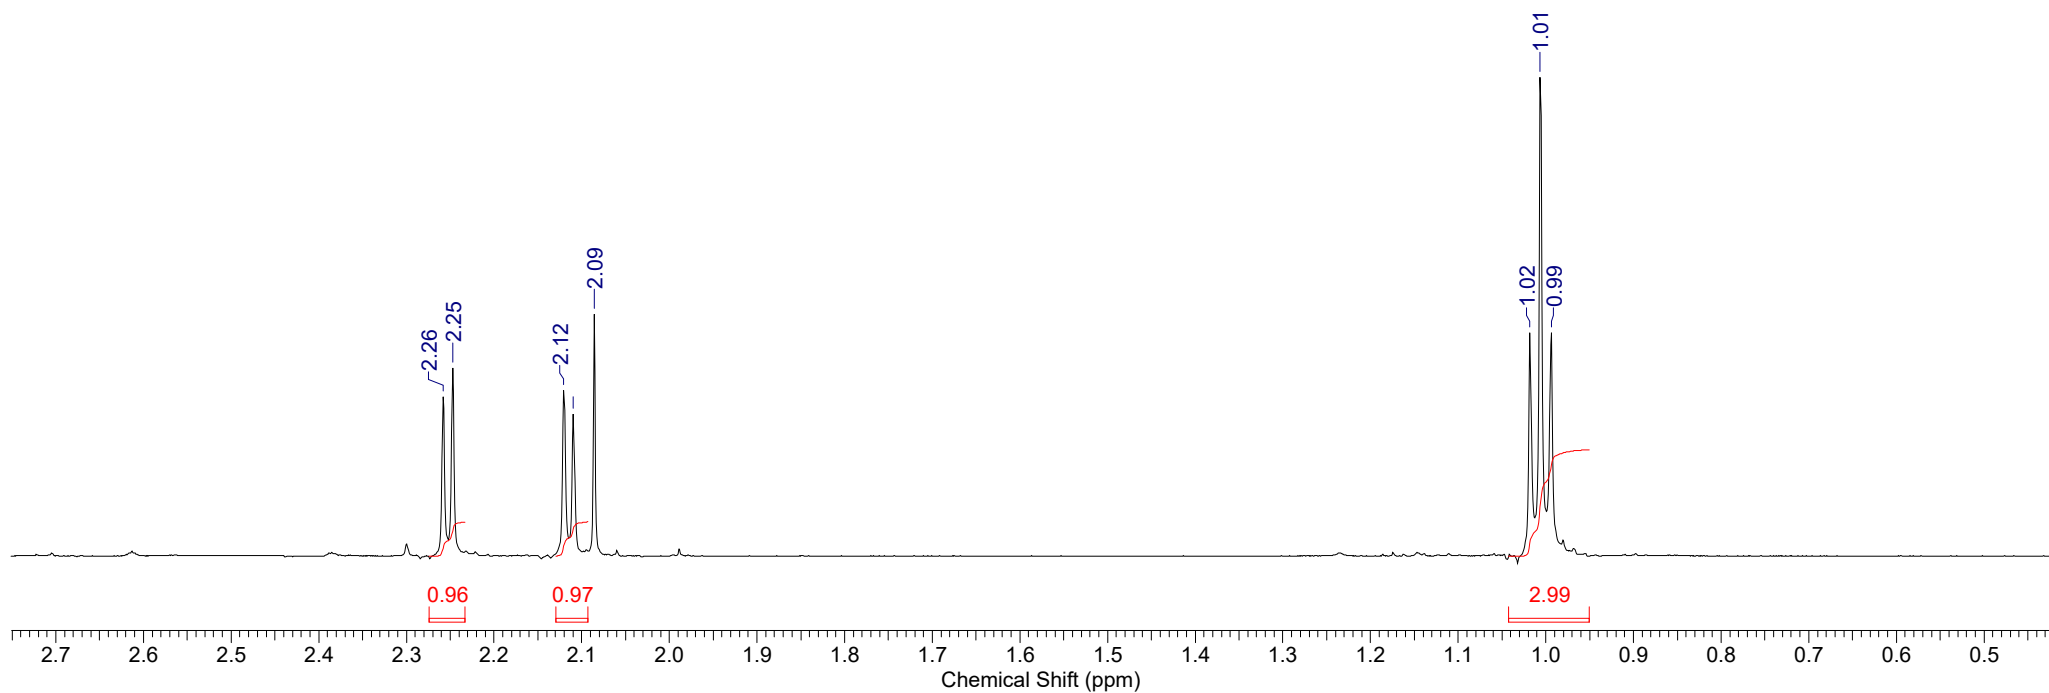

|                                                                  |                    |
|------------------------------------------------------------------|--------------------|
| <b>Formula</b> C <sub>16</sub> H <sub>17</sub> NO <sub>6</sub> S | <b>FW</b> 351.3743 |
|------------------------------------------------------------------|--------------------|

|                                        |                                                           |                                    |
|----------------------------------------|-----------------------------------------------------------|------------------------------------|
| <b>Acquisition Time (sec)</b> 0.6921   | <b>Comment</b> single pulse decoupled gated NOE           | <b>Date</b> 21 Aug 2020 13:03:02   |
| <b>Date Stamp</b> 21 Aug 2020 13:04:10 | <b>File Name</b> C:\USERS\lpa6a534\DOWNLOADS\FZ9035-2.JDF | <b>Frequency (MHz)</b> 150.91      |
| <b>Nucleus</b> 13C                     | <b>Number of Transients</b> 1000                          | <b>Origin</b> ECA 600              |
| <b>Points Count</b> 32768              | <b>Pulse Sequence</b> single pulse dec                    | <b>Original Points Count</b> 32768 |
| <b>Spectrum Offset (Hz)</b> 15091.3428 | <b>Sweep Width (Hz)</b> 47348.49                          | <b>Receiver Gain</b> 56.00         |
|                                        |                                                           | <b>Solvent</b> DMSO-d6             |

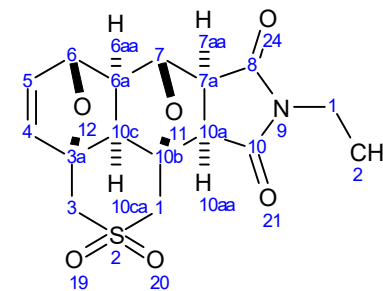

FZ9035-2.JDF

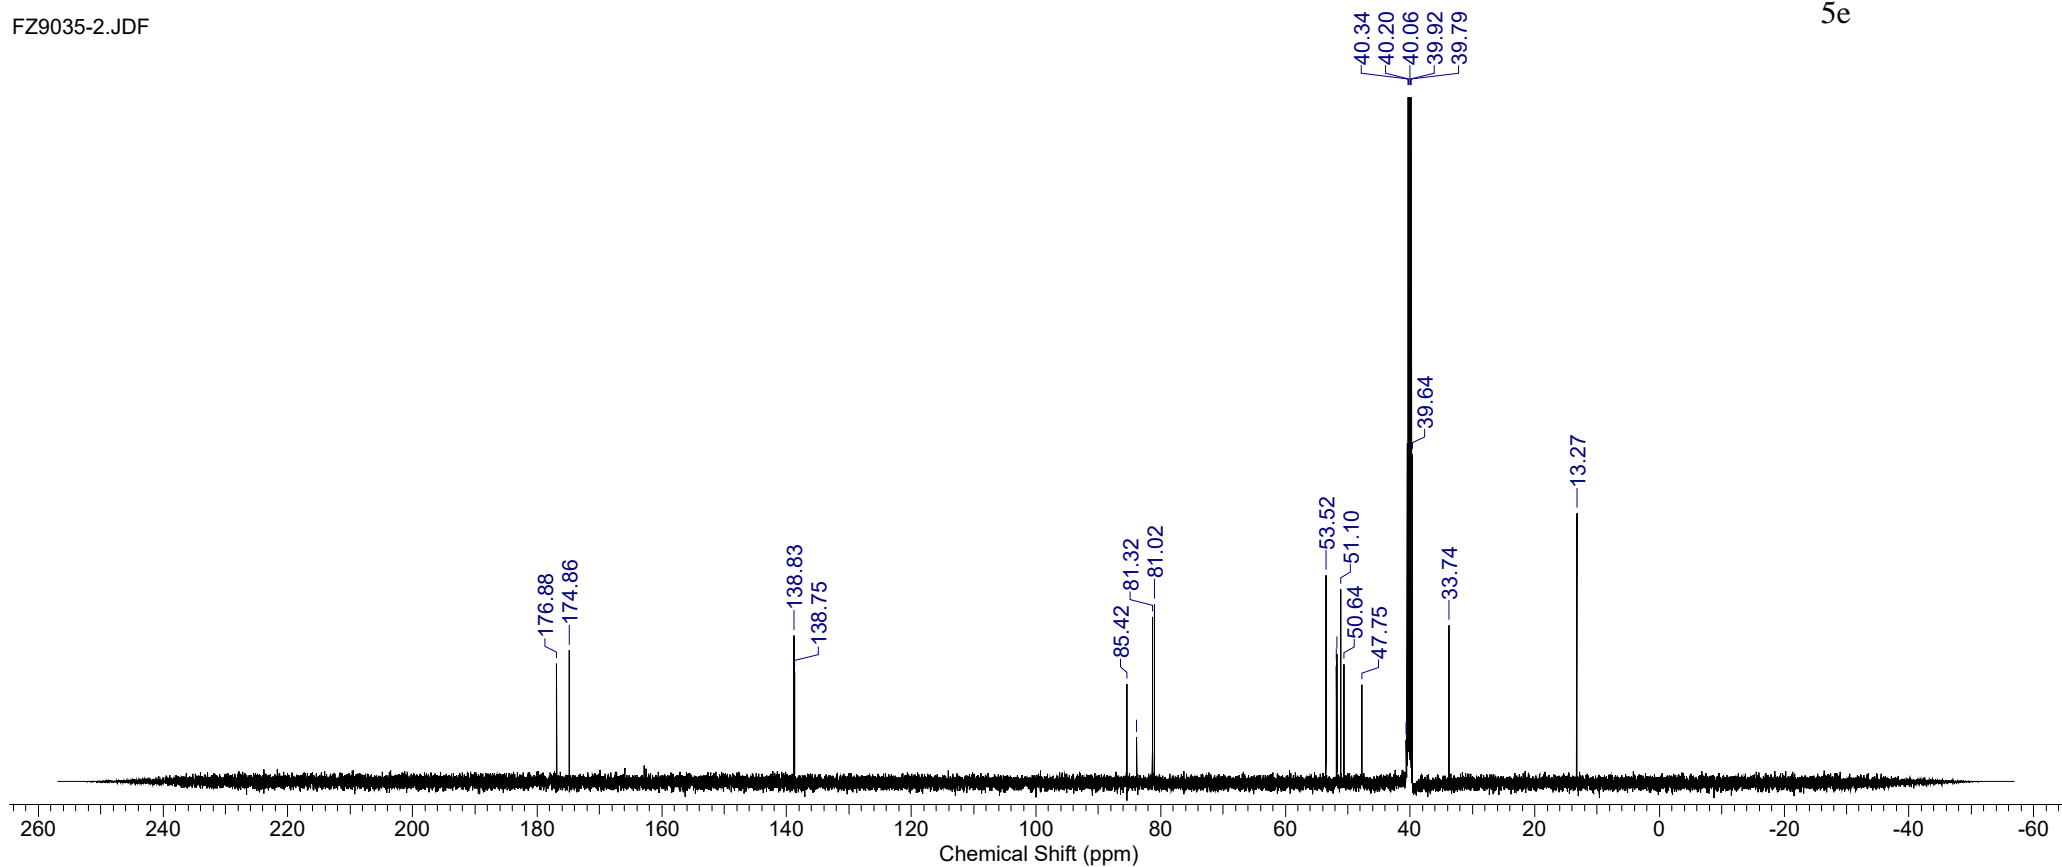



|                                                                  |                    |
|------------------------------------------------------------------|--------------------|
| <b>Formula</b> C <sub>16</sub> H <sub>17</sub> NO <sub>6</sub> S | <b>FW</b> 351.3743 |
|------------------------------------------------------------------|--------------------|

|                                        |                                                          |                                    |
|----------------------------------------|----------------------------------------------------------|------------------------------------|
| <b>Acquisition Time (sec)</b> 0.6921   | <b>Comment</b> single pulse decoupled gated NOE          | <b>Date</b> 21 Aug 2020 13:03:02   |
| <b>Date Stamp</b> 21 Aug 2020 13:04:10 | <b>File Name</b> C:\USERS\Ia6a534\DOWNLOADS\FZ9035-2.JDF | <b>Frequency (MHz)</b> 150.91      |
| <b>Nucleus</b> 13C                     | <b>Number of Transients</b> 1000                         | <b>Origin</b> ECA 600              |
| <b>Points Count</b> 32768              | <b>Pulse Sequence</b> single pulse dec                   | <b>Original Points Count</b> 32768 |
| <b>Spectrum Offset (Hz)</b> 15091.3428 | <b>Sweep Width (Hz)</b> 47348.49                         | <b>Receiver Gain</b> 56.00         |
|                                        |                                                          | <b>Solvent</b> DMSO-d6             |



FZ9035-2.JDF

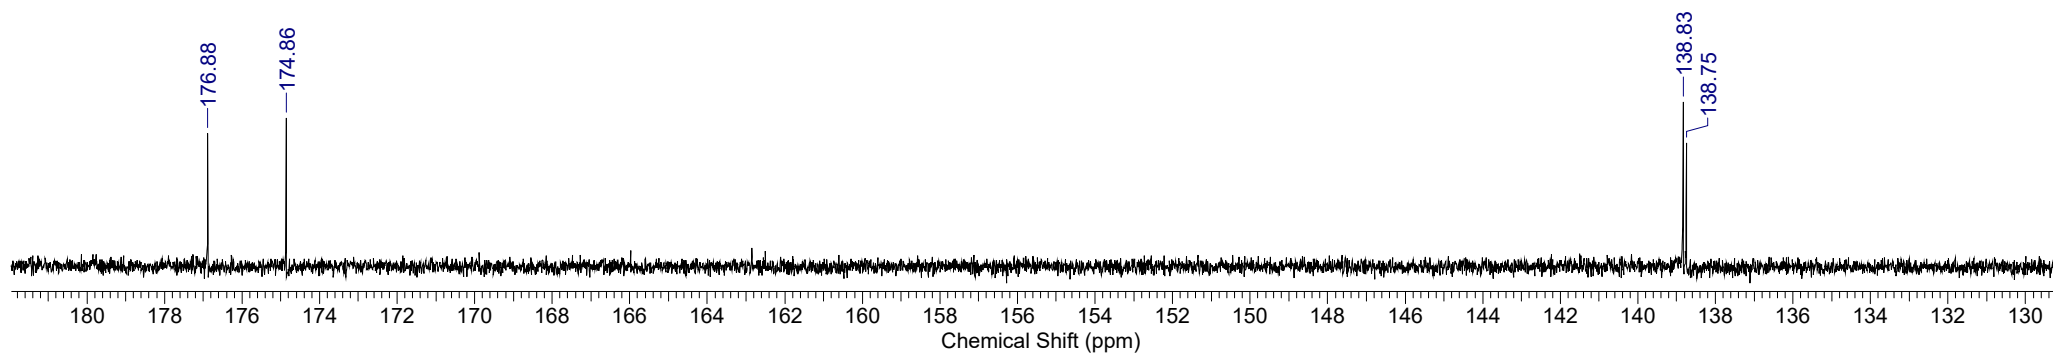

|                                                                  |                    |
|------------------------------------------------------------------|--------------------|
| <b>Formula</b> C <sub>16</sub> H <sub>17</sub> NO <sub>6</sub> S | <b>FW</b> 351.3743 |
|------------------------------------------------------------------|--------------------|

|                                        |                                                           |                                    |
|----------------------------------------|-----------------------------------------------------------|------------------------------------|
| <b>Acquisition Time (sec)</b> 0.6921   | <b>Comment</b> single pulse decoupled gated NOE           | <b>Date</b> 21 Aug 2020 13:03:02   |
| <b>Date Stamp</b> 21 Aug 2020 13:04:10 | <b>File Name</b> C:\USERS\lta6a534\DOWNLOADS\FZ9035-2.JDF | <b>Frequency (MHz)</b> 150.91      |
| <b>Nucleus</b> 13C                     | <b>Number of Transients</b> 1000                          | <b>Origin</b> ECA 600              |
| <b>Points Count</b> 32768              | <b>Pulse Sequence</b> single pulse dec                    | <b>Original Points Count</b> 32768 |
| <b>Spectrum Offset (Hz)</b> 15091.3428 | <b>Sweep Width (Hz)</b> 47348.49                          | <b>Receiver Gain</b> 56.00         |
|                                        |                                                           | <b>Solvent</b> DMSO-d6             |



5e

FZ9035-2.JDF

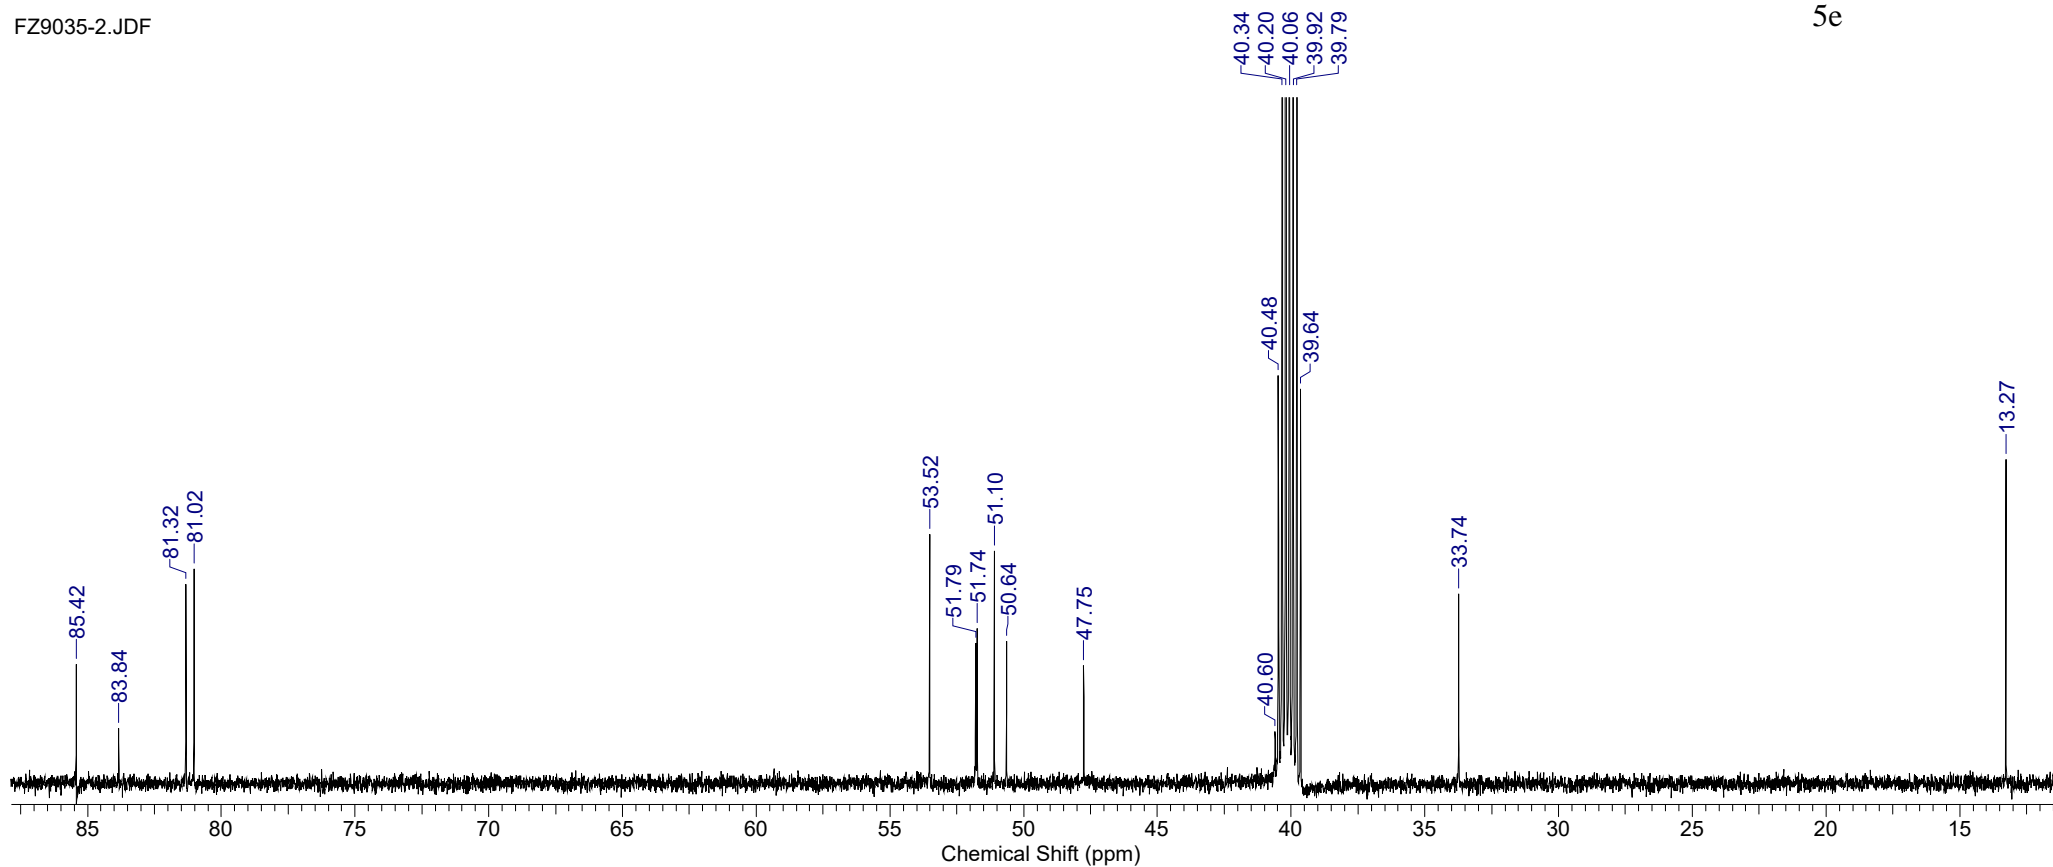

|                                                                              |                    |
|------------------------------------------------------------------------------|--------------------|
| <b>Formula</b> C <sub>22</sub> H <sub>20</sub> N <sub>2</sub> O <sub>5</sub> | <b>FW</b> 392.4046 |
|------------------------------------------------------------------------------|--------------------|

|                                                           |                                    |                                        |                                        |
|-----------------------------------------------------------|------------------------------------|----------------------------------------|----------------------------------------|
| <b>Acquisition Time (sec)</b> 1.9818                      | <b>Comment</b> single_pulse        | <b>Date</b> 20 Aug 2020 12:45:12       | <b>Date Stamp</b> 20 Aug 2020 12:46:18 |
| <b>File Name</b> C:\USERS\Лаб6а534\DOWNLOADS\FZ9021-1.JDF | <b>Frequency (MHz)</b> 600.17      | <b>Nucleus</b> 1H                      | <b>Number of Transients</b> 8          |
| <b>Origin</b> ECA 600                                     | <b>Original Points Count</b> 32768 | <b>Owner</b> CKP                       | <b>Points Count</b> 32768              |
| <b>Receiver Gain</b> 42.00                                | <b>Solvent</b> DMSO-d6             | <b>Spectrum Offset (Hz)</b> 5422.2334  | <b>Sweep Width (Hz)</b> 16534.39       |
|                                                           |                                    | <b>Pulse Sequence</b> single_pulse.ex2 |                                        |

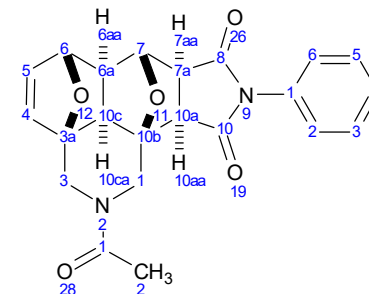

6a

FZ9021-1.ESP

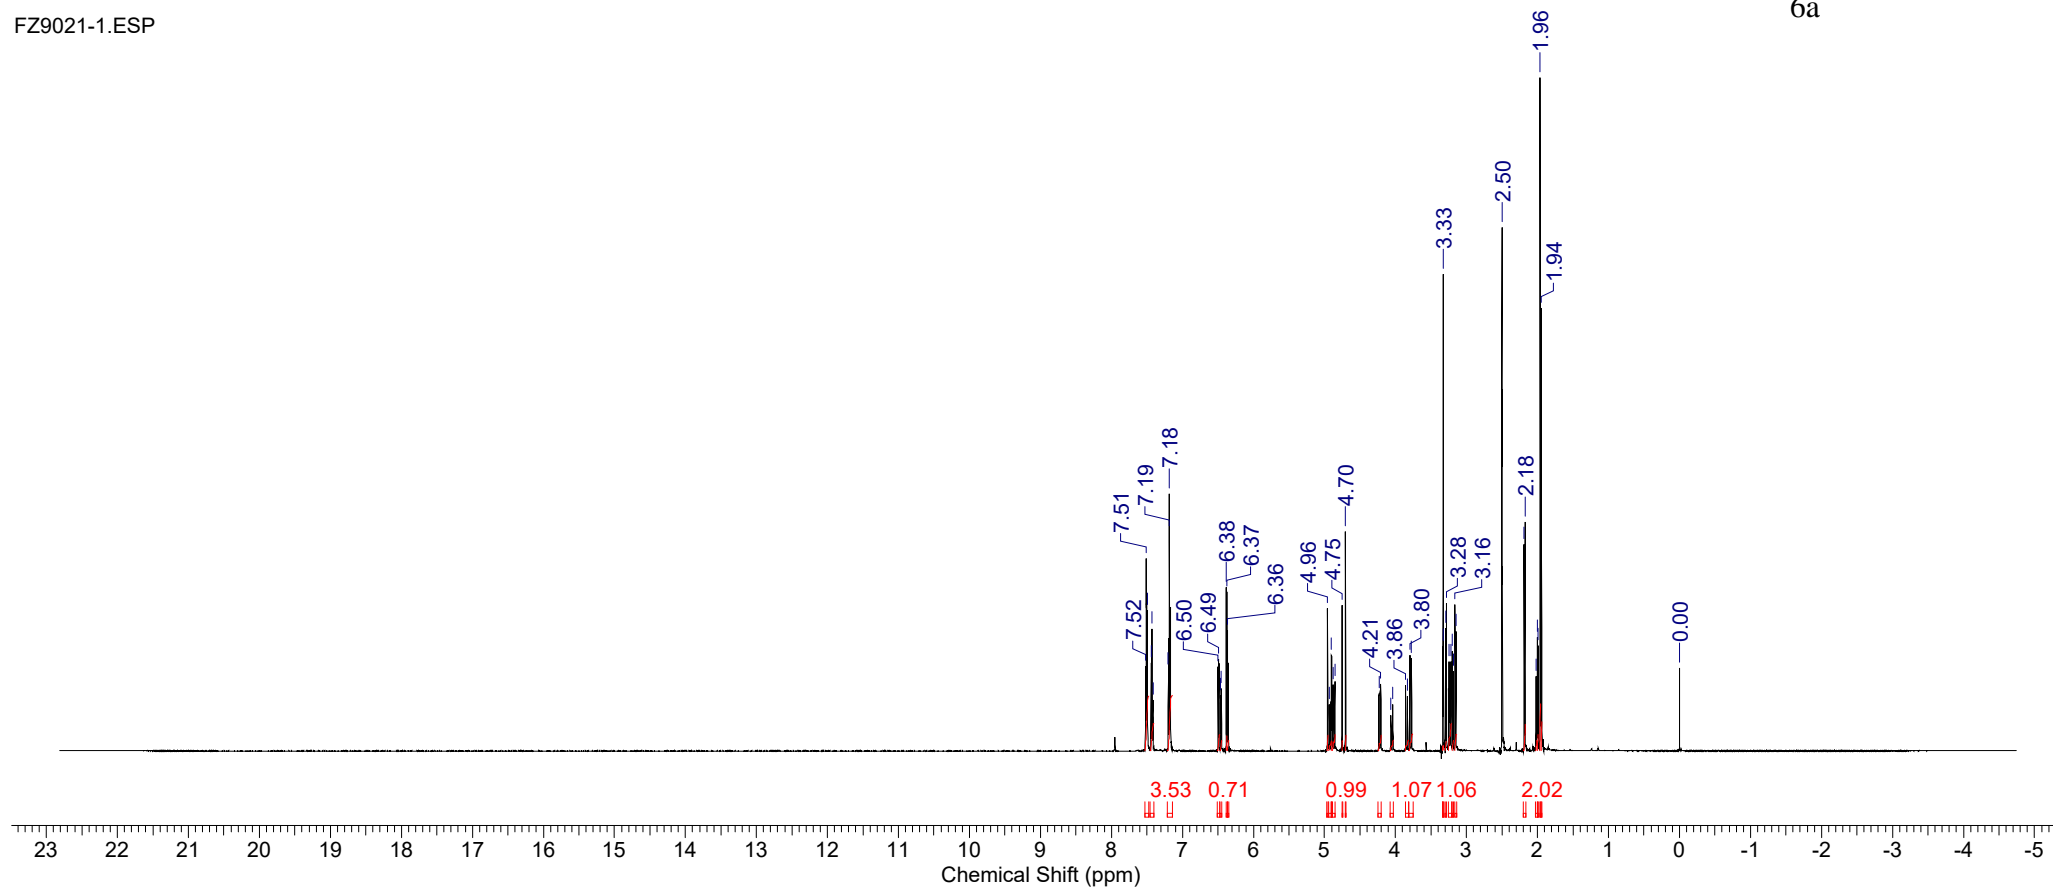

Formula  $C_{22}H_{20}N_2O_5$  FW 392.4046

|                        |                                         |                       |              |                      |                      |                      |                      |
|------------------------|-----------------------------------------|-----------------------|--------------|----------------------|----------------------|----------------------|----------------------|
| Acquisition Time (sec) | 1.9818                                  | Comment               | single_pulse | Date                 | 20 Aug 2020 12:45:12 | Date Stamp           | 20 Aug 2020 12:46:18 |
| File Name              | C:\USERS\Лабa534\DOWNLOADS\FZ9021-1.JDF | Frequency (MHz)       | 600.17       | Nucleus              | 1H                   | Number of Transients | 8                    |
| Origin                 | ECA 600                                 | Original Points Count | 32768        | Owner                | CKP                  | Points Count         | 32768                |
| Receiver Gain          | 42.00                                   | Solvent               | DMSO-d6      | Spectrum Offset (Hz) | 5422.2334            | Sweep Width (Hz)     | 16534.39             |
|                        |                                         |                       |              |                      |                      | Pulse Sequence       | single_pulse.ex2     |

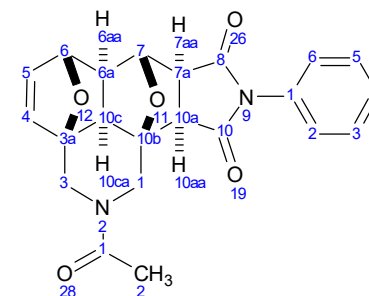

6a

FZ9021-1.JDF

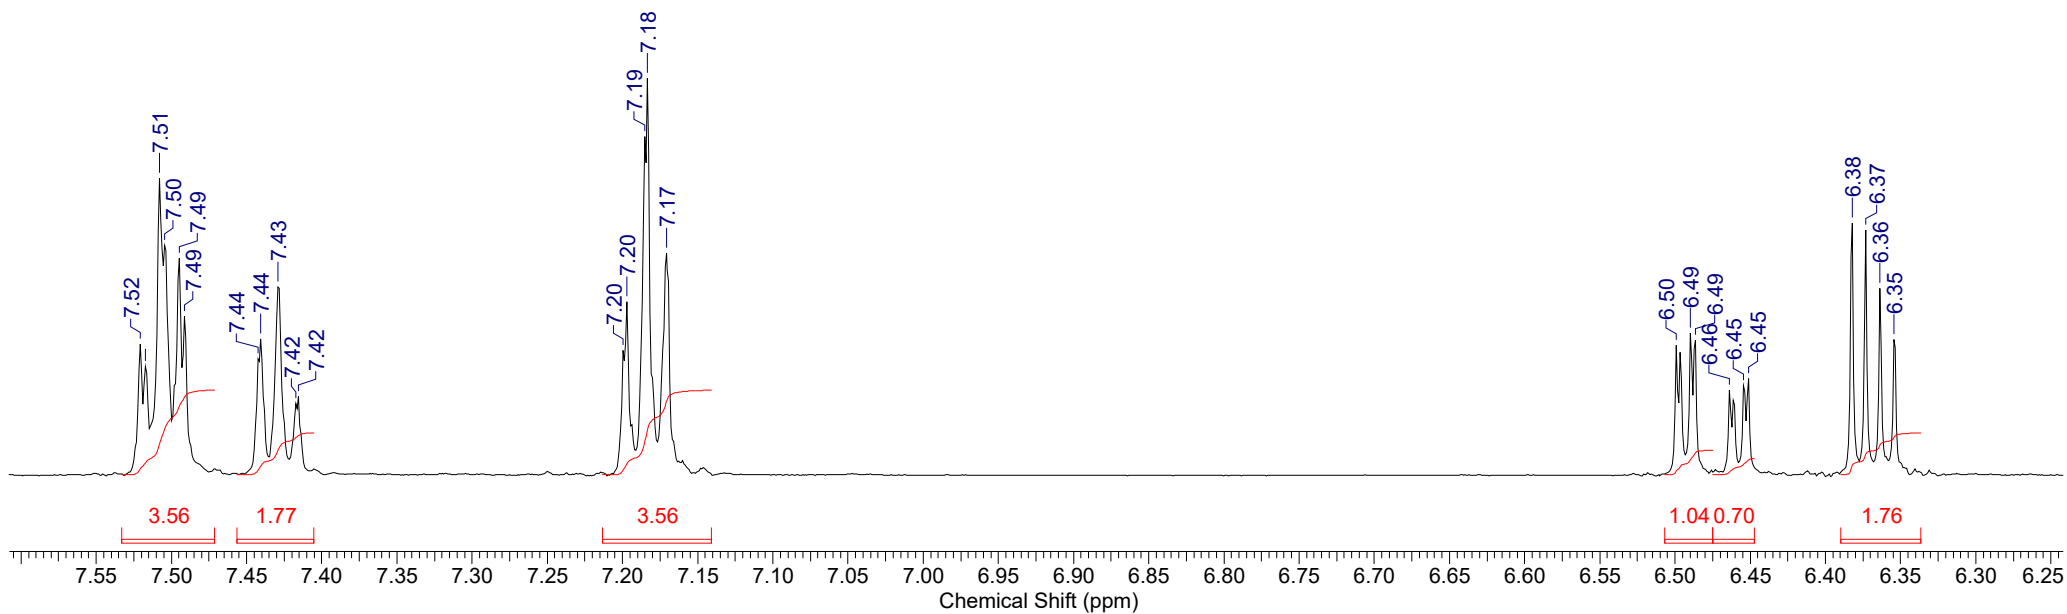

|                                                                              |                    |
|------------------------------------------------------------------------------|--------------------|
| <b>Formula</b> C <sub>22</sub> H <sub>20</sub> N <sub>2</sub> O <sub>5</sub> | <b>FW</b> 392.4046 |
|------------------------------------------------------------------------------|--------------------|

|                                                          |                                    |                                        |                                        |
|----------------------------------------------------------|------------------------------------|----------------------------------------|----------------------------------------|
| <b>Acquisition Time (sec)</b> 1.9818                     | <b>Comment</b> single_pulse        | <b>Date</b> 20 Aug 2020 12:45:12       | <b>Date Stamp</b> 20 Aug 2020 12:46:18 |
| <b>File Name</b> C:\USERS\Лабa534\DOWNLOADS\FZ9021-1.JDF | <b>Frequency (MHz)</b> 600.17      | <b>Nucleus</b> 1H                      | <b>Number of Transients</b> 8          |
| <b>Origin</b> ECA 600                                    | <b>Original Points Count</b> 32768 | <b>Owner</b> CKP                       | <b>Points Count</b> 32768              |
| <b>Receiver Gain</b> 42.00                               | <b>Solvent</b> DMSO-d6             | <b>Spectrum Offset (Hz)</b> 5422.2334  | <b>Sweep Width (Hz)</b> 16534.39       |
|                                                          |                                    | <b>Pulse Sequence</b> single_pulse.ex2 |                                        |



6a

FZ9021-1.JDF

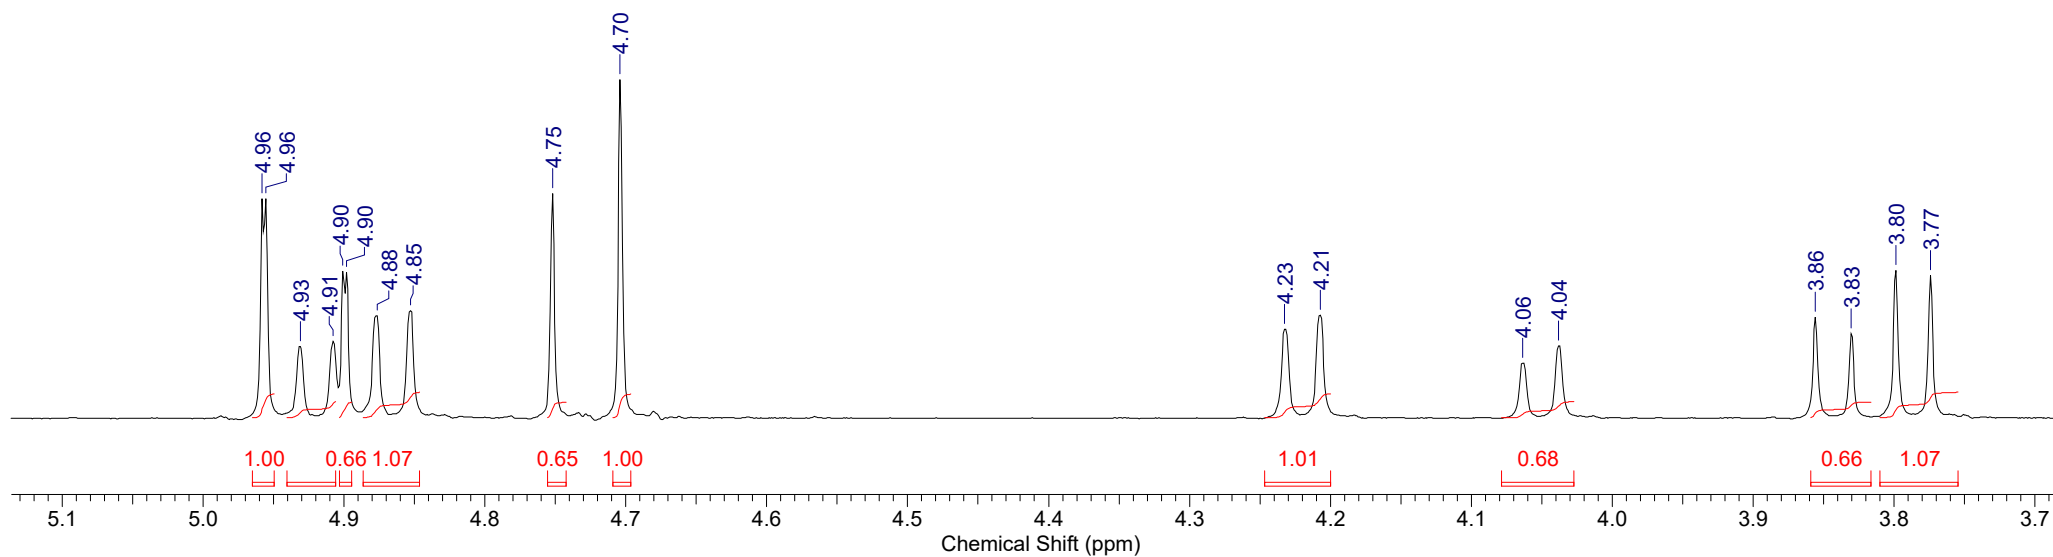

Formula C<sub>22</sub>H<sub>20</sub>N<sub>2</sub>O<sub>5</sub> FW 392.4046

|                        |                                         |                       |              |                      |                      |                      |                      |
|------------------------|-----------------------------------------|-----------------------|--------------|----------------------|----------------------|----------------------|----------------------|
| Acquisition Time (sec) | 1.9818                                  | Comment               | single_pulse | Date                 | 20 Aug 2020 12:45:12 | Date Stamp           | 20 Aug 2020 12:46:18 |
| File Name              | C:\USERS\Лабa534\DOWNLOADS\FZ9021-1.JDF | Frequency (MHz)       | 600.17       | Nucleus              | 1H                   | Number of Transients | 8                    |
| Origin                 | ECA 600                                 | Original Points Count | 32768        | Owner                | CKP                  | Points Count         | 32768                |
| Receiver Gain          | 42.00                                   | Solvent               | DMSO-d6      | Spectrum Offset (Hz) | 5422.2334            | Sweep Width (Hz)     | 16534.39             |
|                        |                                         |                       |              |                      |                      | Pulse Sequence       | single_pulse.ex2     |

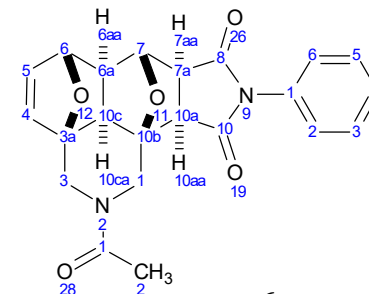

FZ9021-1.JDF

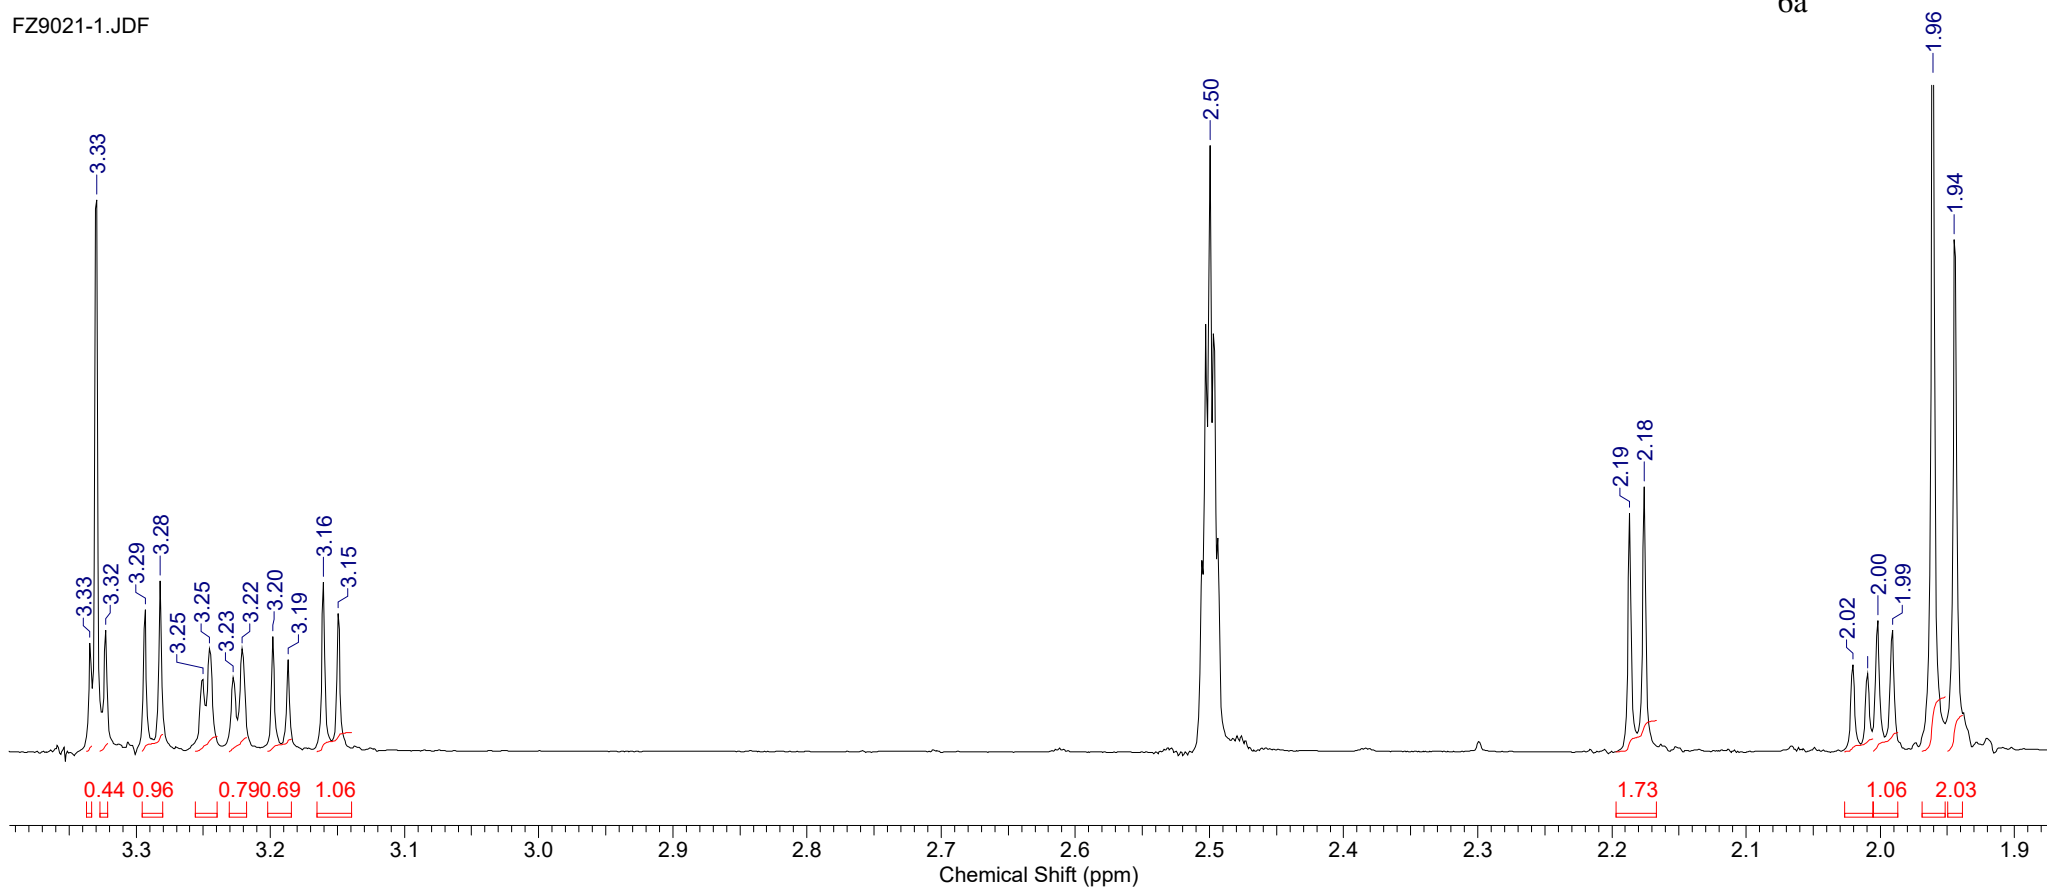

|                                                                              |                    |
|------------------------------------------------------------------------------|--------------------|
| <b>Formula</b> C <sub>22</sub> H <sub>20</sub> N <sub>2</sub> O <sub>5</sub> | <b>FW</b> 392.4046 |
|------------------------------------------------------------------------------|--------------------|

|                                        |                                                           |                                    |
|----------------------------------------|-----------------------------------------------------------|------------------------------------|
| <b>Acquisition Time (sec)</b> 0.6921   | <b>Comment</b> single pulse decoupled gated NOE           | <b>Date</b> 20 Aug 2020 13:18:21   |
| <b>Date Stamp</b> 20 Aug 2020 13:19:28 | <b>File Name</b> C:\USERS\lpa6a534\DOWNLOADS\FZ9021-2.JDF | <b>Frequency (MHz)</b> 150.91      |
| <b>Nucleus</b> 13C                     | <b>Number of Transients</b> 2000                          | <b>Origin</b> ECA 600              |
| <b>Points Count</b> 32768              | <b>Pulse Sequence</b> single pulse dec                    | <b>Original Points Count</b> 32768 |
| <b>Spectrum Offset (Hz)</b> 15091.3428 | <b>Sweep Width (Hz)</b> 47348.49                          | <b>Receiver Gain</b> 56.00         |
|                                        |                                                           | <b>Solvent</b> DMSO-d6             |

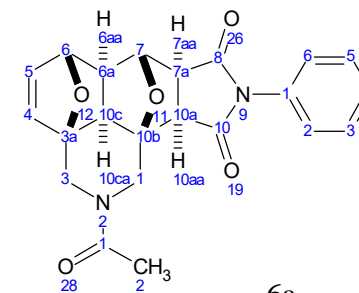

FZ9021-2.JDF

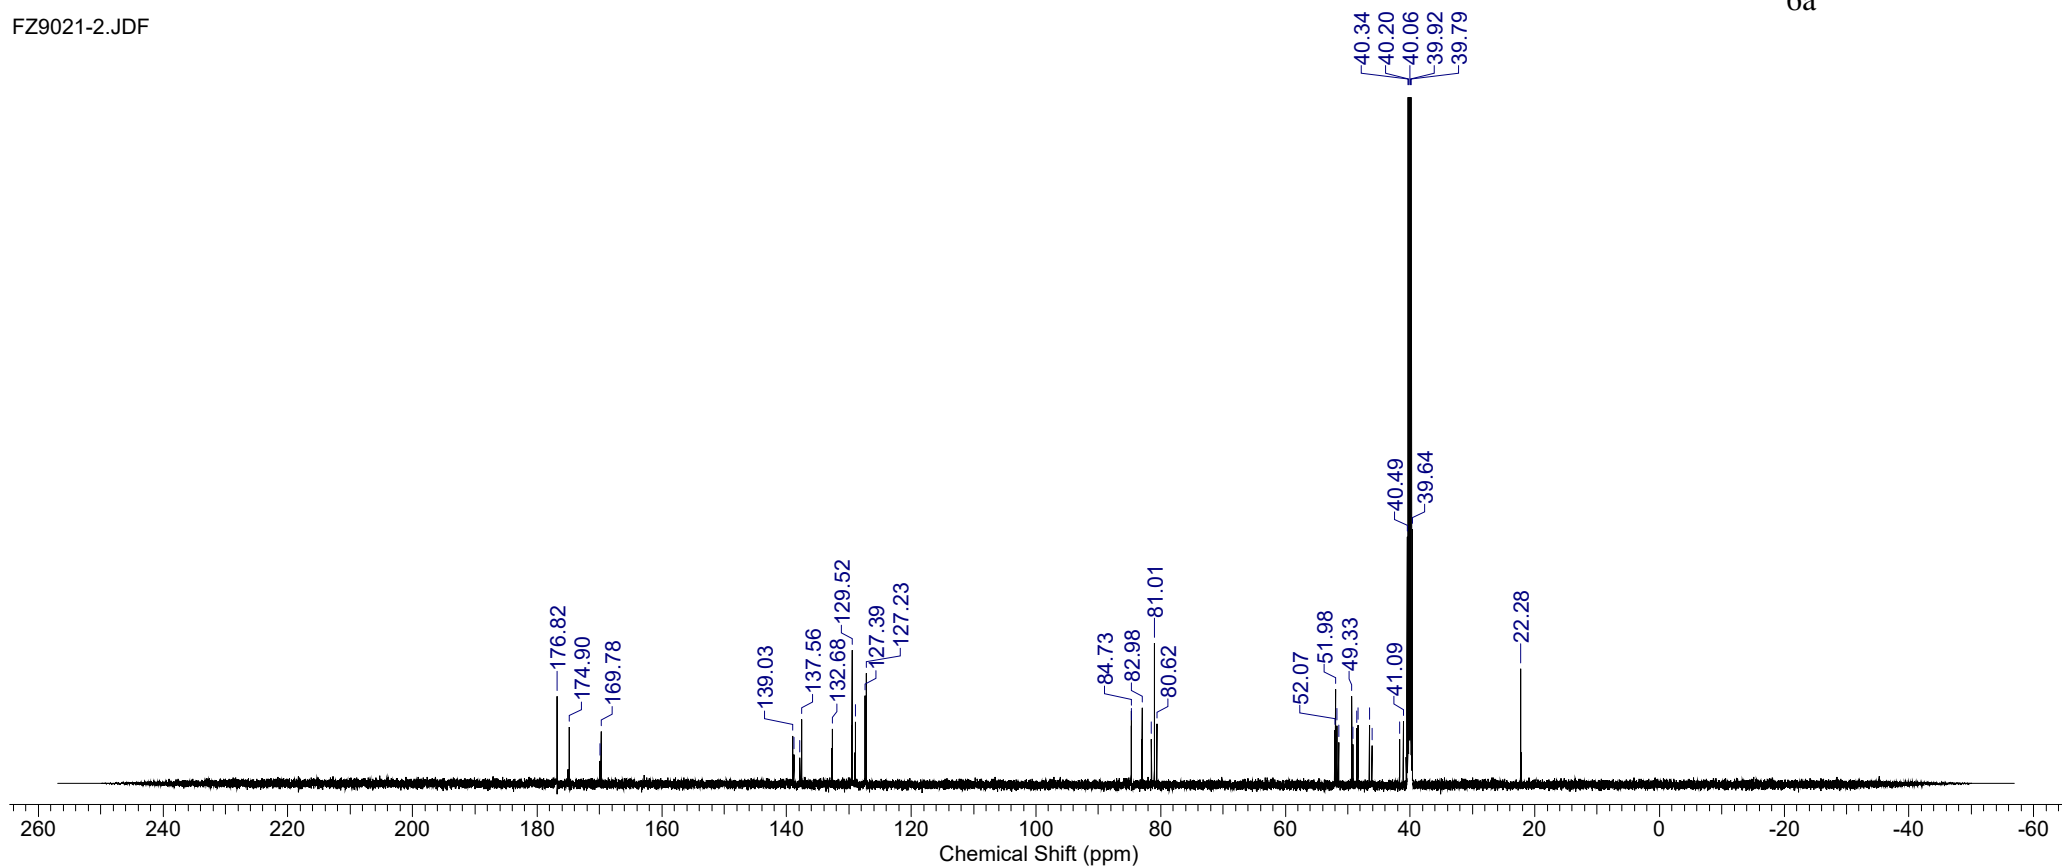

|                                                                              |                    |
|------------------------------------------------------------------------------|--------------------|
| <b>Formula</b> C <sub>22</sub> H <sub>20</sub> N <sub>2</sub> O <sub>5</sub> | <b>FW</b> 392.4046 |
|------------------------------------------------------------------------------|--------------------|

|                                        |                                                           |                                    |
|----------------------------------------|-----------------------------------------------------------|------------------------------------|
| <b>Acquisition Time (sec)</b> 0.6921   | <b>Comment</b> single pulse decoupled gated NOE           | <b>Date</b> 20 Aug 2020 13:18:21   |
| <b>Date Stamp</b> 20 Aug 2020 13:19:28 | <b>File Name</b> C:\USERS\l1a6a534\DOWNLOADS\FZ9021-2.JDF | <b>Frequency (MHz)</b> 150.91      |
| <b>Nucleus</b> 13C                     | <b>Number of Transients</b> 2000                          | <b>Origin</b> ECA 600              |
| <b>Points Count</b> 32768              | <b>Pulse Sequence</b> single pulse dec                    | <b>Original Points Count</b> 32768 |
| <b>Spectrum Offset (Hz)</b> 15091.3428 | <b>Sweep Width (Hz)</b> 47348.49                          | <b>Receiver Gain</b> 56.00         |
|                                        |                                                           | <b>Solvent</b> DMSO-d6             |

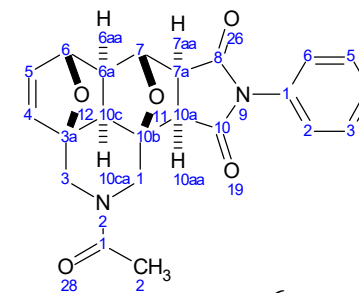

6a

FZ9021-2.JDF

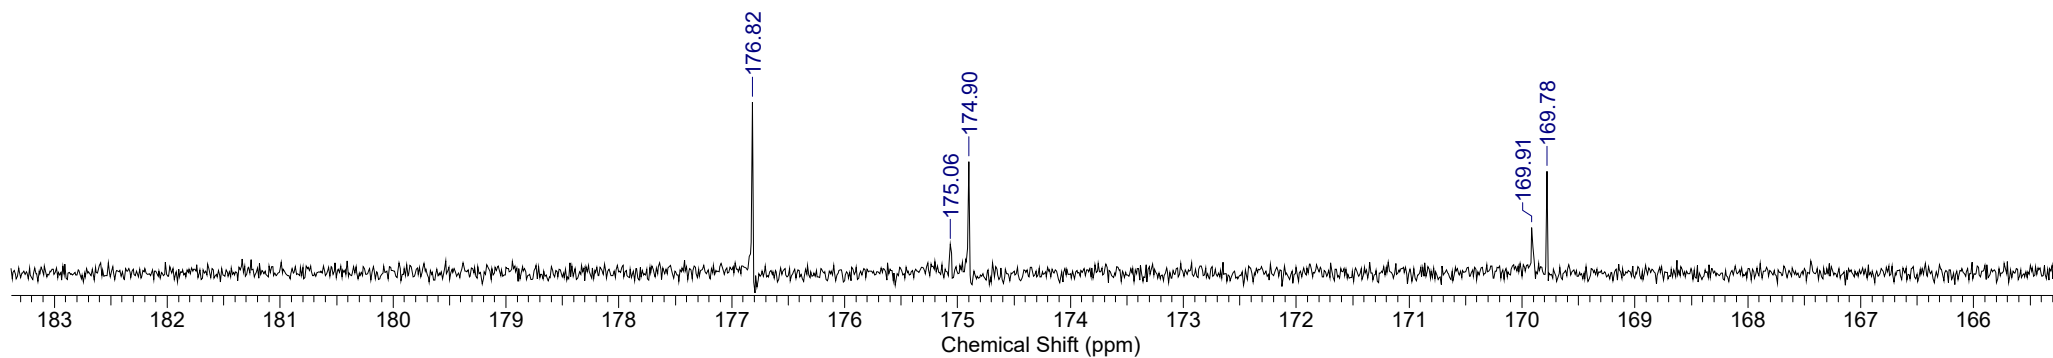



|                                                                              |                    |
|------------------------------------------------------------------------------|--------------------|
| <b>Formula</b> C <sub>22</sub> H <sub>20</sub> N <sub>2</sub> O <sub>5</sub> | <b>FW</b> 392.4046 |
|------------------------------------------------------------------------------|--------------------|

|                                        |                                                           |                                    |
|----------------------------------------|-----------------------------------------------------------|------------------------------------|
| <b>Acquisition Time (sec)</b> 0.6921   | <b>Comment</b> single pulse decoupled gated NOE           | <b>Date</b> 20 Aug 2020 13:18:21   |
| <b>Date Stamp</b> 20 Aug 2020 13:19:28 | <b>File Name</b> C:\USERS\lta6a534\DOWNLOADS\FZ9021-2.JDF | <b>Frequency (MHz)</b> 150.91      |
| <b>Nucleus</b> 13C                     | <b>Number of Transients</b> 2000                          | <b>Origin</b> ECA 600              |
| <b>Points Count</b> 32768              | <b>Pulse Sequence</b> single pulse dec                    | <b>Original Points Count</b> 32768 |
| <b>Spectrum Offset (Hz)</b> 15091.3428 | <b>Sweep Width (Hz)</b> 47348.49                          | <b>Receiver Gain</b> 56.00         |
|                                        |                                                           | <b>Solvent</b> DMSO-d6             |

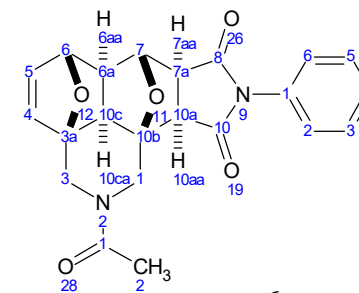

6a

FZ9021-2.JDF

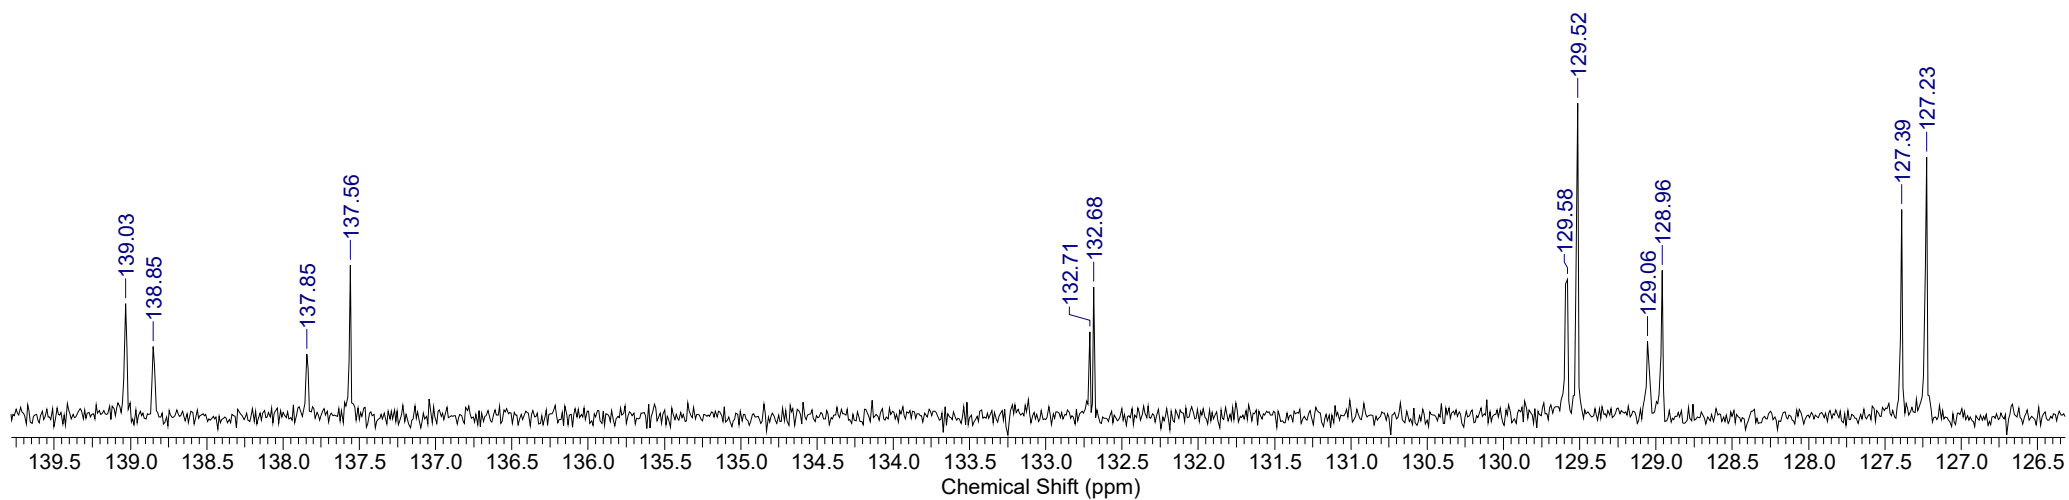

|                                                                              |                    |
|------------------------------------------------------------------------------|--------------------|
| <b>Formula</b> C <sub>22</sub> H <sub>20</sub> N <sub>2</sub> O <sub>5</sub> | <b>FW</b> 392.4046 |
|------------------------------------------------------------------------------|--------------------|

|                                        |                                                           |                                    |
|----------------------------------------|-----------------------------------------------------------|------------------------------------|
| <b>Acquisition Time (sec)</b> 0.6921   | <b>Comment</b> single pulse decoupled gated NOE           | <b>Date</b> 20 Aug 2020 13:18:21   |
| <b>Date Stamp</b> 20 Aug 2020 13:19:28 | <b>File Name</b> C:\USERS\l1a6a534\DOWNLOADS\FZ9021-2.JDF | <b>Frequency (MHz)</b> 150.91      |
| <b>Nucleus</b> 13C                     | <b>Number of Transients</b> 2000                          | <b>Origin</b> ECA 600              |
| <b>Points Count</b> 32768              | <b>Pulse Sequence</b> single pulse dec                    | <b>Original Points Count</b> 32768 |
| <b>Spectrum Offset (Hz)</b> 15091.3428 | <b>Sweep Width (Hz)</b> 47348.49                          | <b>Receiver Gain</b> 56.00         |
|                                        |                                                           | <b>Solvent</b> DMSO-d6             |

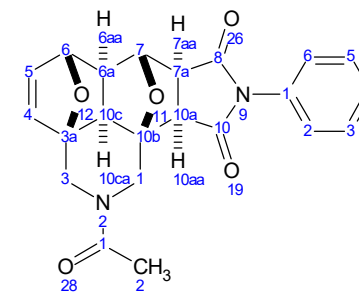

6a

FZ9021-2.JDF

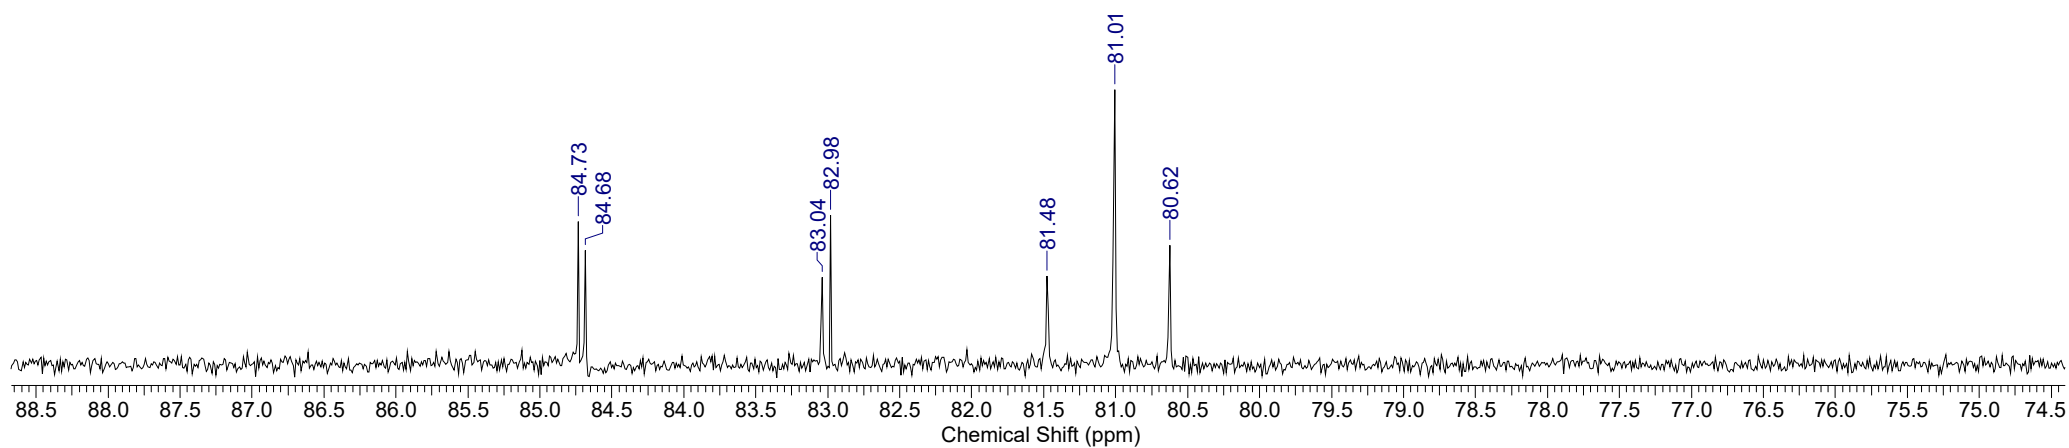

|                                                                              |                    |
|------------------------------------------------------------------------------|--------------------|
| <b>Formula</b> C <sub>22</sub> H <sub>20</sub> N <sub>2</sub> O <sub>5</sub> | <b>FW</b> 392.4046 |
|------------------------------------------------------------------------------|--------------------|

|                                        |                                                           |                                    |
|----------------------------------------|-----------------------------------------------------------|------------------------------------|
| <b>Acquisition Time (sec)</b> 0.6921   | <b>Comment</b> single pulse decoupled gated NOE           | <b>Date</b> 20 Aug 2020 13:18:21   |
| <b>Date Stamp</b> 20 Aug 2020 13:19:28 | <b>File Name</b> C:\USERS\lpa6a534\DOWNLOADS\FZ9021-2.JDF | <b>Frequency (MHz)</b> 150.91      |
| <b>Nucleus</b> 13C                     | <b>Number of Transients</b> 2000                          | <b>Origin</b> ECA 600              |
| <b>Points Count</b> 32768              | <b>Pulse Sequence</b> single pulse dec                    | <b>Original Points Count</b> 32768 |
| <b>Spectrum Offset (Hz)</b> 15091.3428 | <b>Sweep Width (Hz)</b> 47348.49                          | <b>Receiver Gain</b> 56.00         |
|                                        |                                                           | <b>Solvent</b> DMSO-d6             |



6a

FZ9021-2.JDF

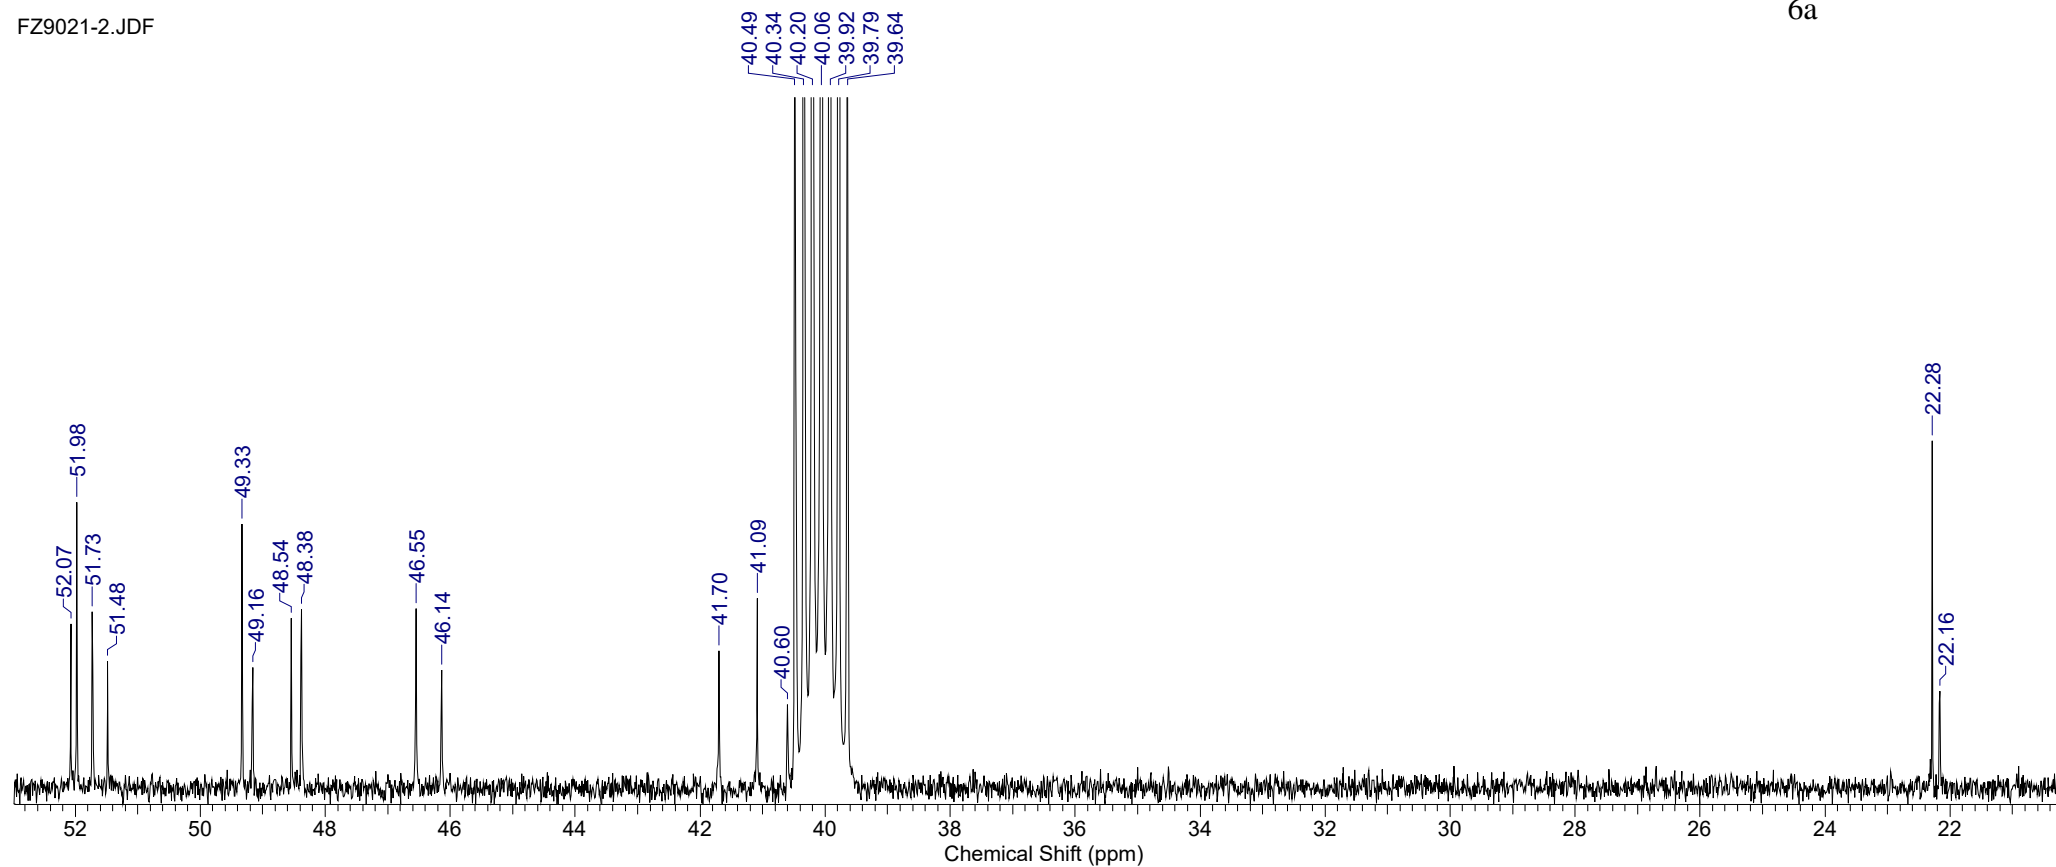

|                                                                              |                    |
|------------------------------------------------------------------------------|--------------------|
| <b>Formula</b> C <sub>25</sub> H <sub>26</sub> N <sub>2</sub> O <sub>6</sub> | <b>FW</b> 450.4837 |
|------------------------------------------------------------------------------|--------------------|

|                                        |                                        |                                                            |                                    |
|----------------------------------------|----------------------------------------|------------------------------------------------------------|------------------------------------|
| <b>Acquisition Time (sec)</b> 1.4549   | <b>Comment</b> single_pulse            | <b>Date</b> 28 Mar 2013 09:31:44                           |                                    |
| <b>Date Stamp</b> 28 Mar 2013 08:43:48 |                                        | <b>File Name</b> C:\USERS\I\Ia6a534\DOWNLOADS\FZ2892-1.JDF | <b>Frequency (MHz)</b> 600.17      |
| <b>Nucleus</b> 1H                      | <b>Number of Transients</b> 8          | <b>Origin</b> ECA 600                                      | <b>Original Points Count</b> 16384 |
| <b>Points Count</b> 16384              | <b>Pulse Sequence</b> single_pulse.ex2 |                                                            | <b>Receiver Gain</b> 30.00         |
| <b>Spectrum Offset (Hz)</b> 3009.6707  | <b>Sweep Width (Hz)</b> 11261.26       | <b>Temperature (degree C)</b> 26.600                       | <b>Solvent</b> CHLOROFORM-d        |

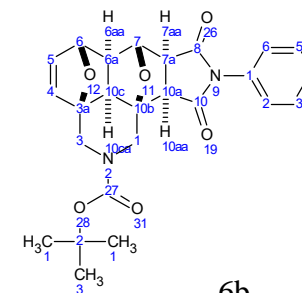

FZ2892-1.JDF

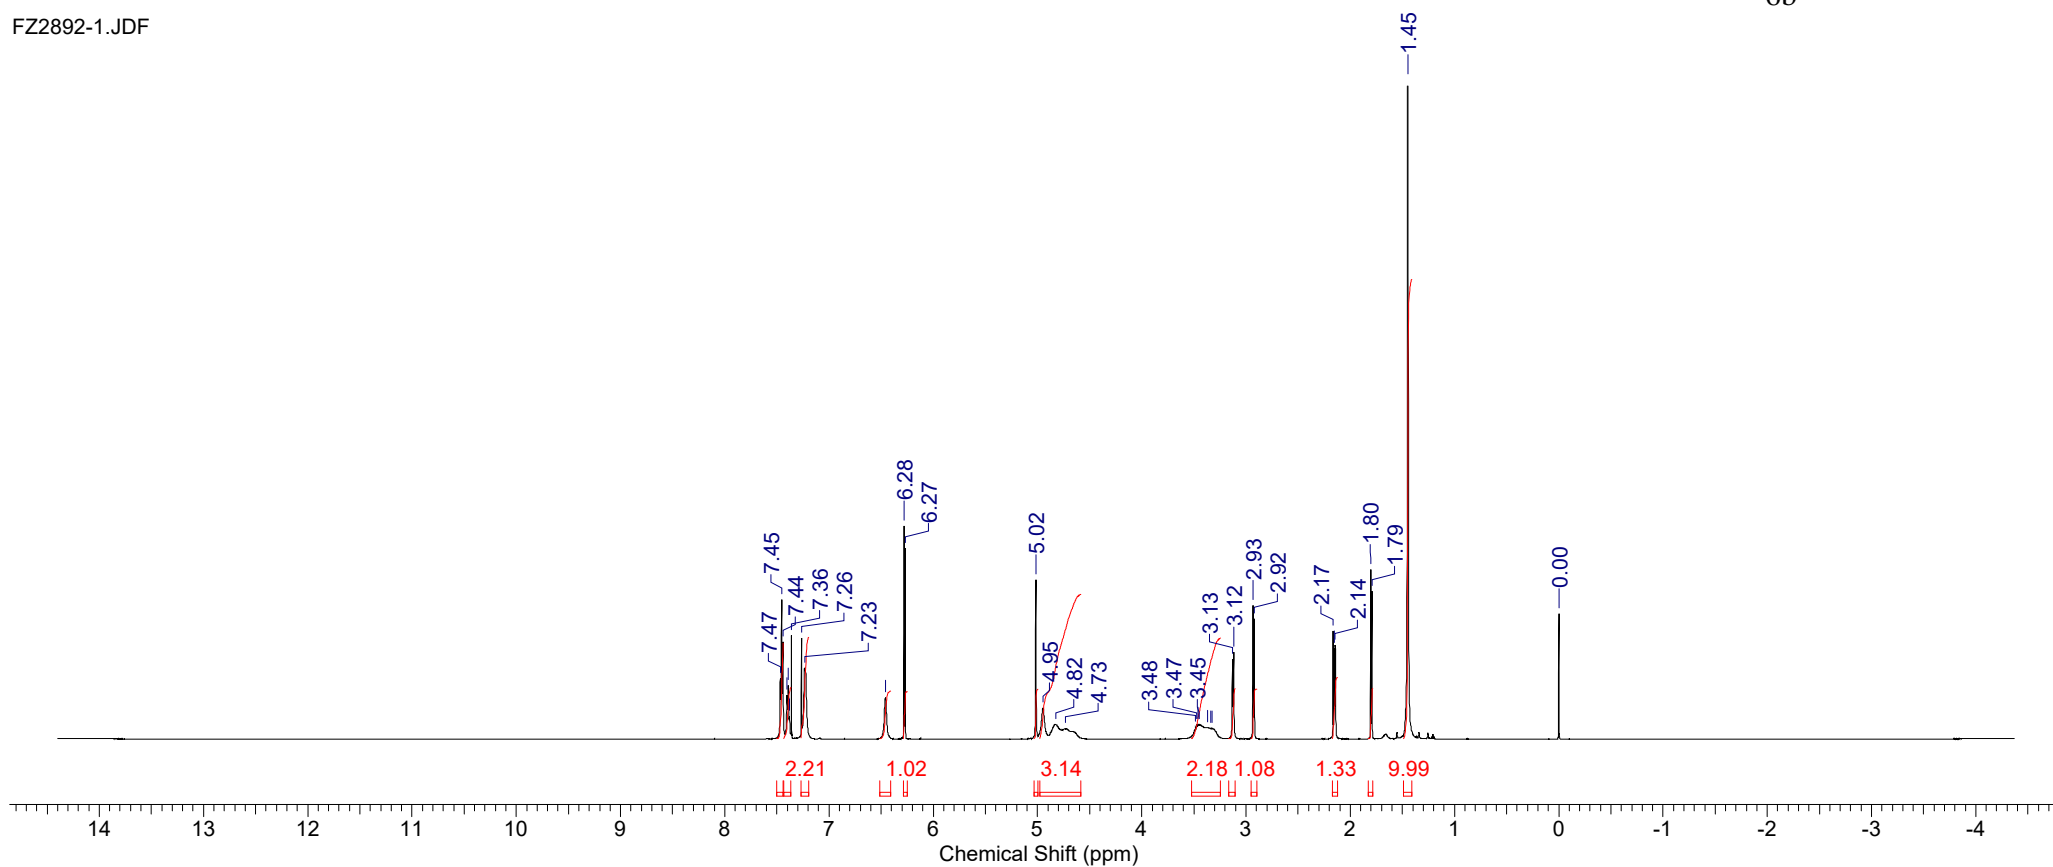

|                                                                              |                    |
|------------------------------------------------------------------------------|--------------------|
| <b>Formula</b> C <sub>25</sub> H <sub>26</sub> N <sub>2</sub> O <sub>6</sub> | <b>FW</b> 450.4837 |
|------------------------------------------------------------------------------|--------------------|

|                               |                      |                               |                                         |                              |                      |
|-------------------------------|----------------------|-------------------------------|-----------------------------------------|------------------------------|----------------------|
| <b>Acquisition Time (sec)</b> | 1.4549               | <b>Comment</b>                | single pulse                            | <b>Date</b>                  | 28 Mar 2013 09:31:44 |
| <b>Date Stamp</b>             | 28 Mar 2013 08:43:48 | <b>File Name</b>              | C:\USERS\Лабa534\DOWNLOADS\FZ2892-1.JDF |                              |                      |
| <b>Nucleus</b>                | 1H                   | <b>Number of Transients</b>   | 8                                       | <b>Origin</b>                | ECA 600              |
| <b>Points Count</b>           | 16384                | <b>Pulse Sequence</b>         | single_pulse.ex2                        | <b>Original Points Count</b> | 16384                |
| <b>Spectrum Offset (Hz)</b>   | 3009.6707            | <b>Sweep Width (Hz)</b>       | 11261.26                                | <b>Receiver Gain</b>         | 30.00                |
|                               |                      | <b>Temperature (degree C)</b> | 26.600                                  |                              |                      |
|                               |                      |                               |                                         | <b>Frequency (MHz)</b>       | 600.17               |
|                               |                      |                               |                                         | <b>Owner</b>                 | delta                |
|                               |                      |                               |                                         | <b>Solvent</b>               | CHLOROFORM-d         |

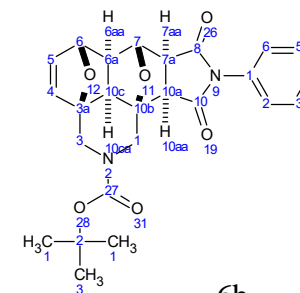

6b

FZ2892-1.JDF

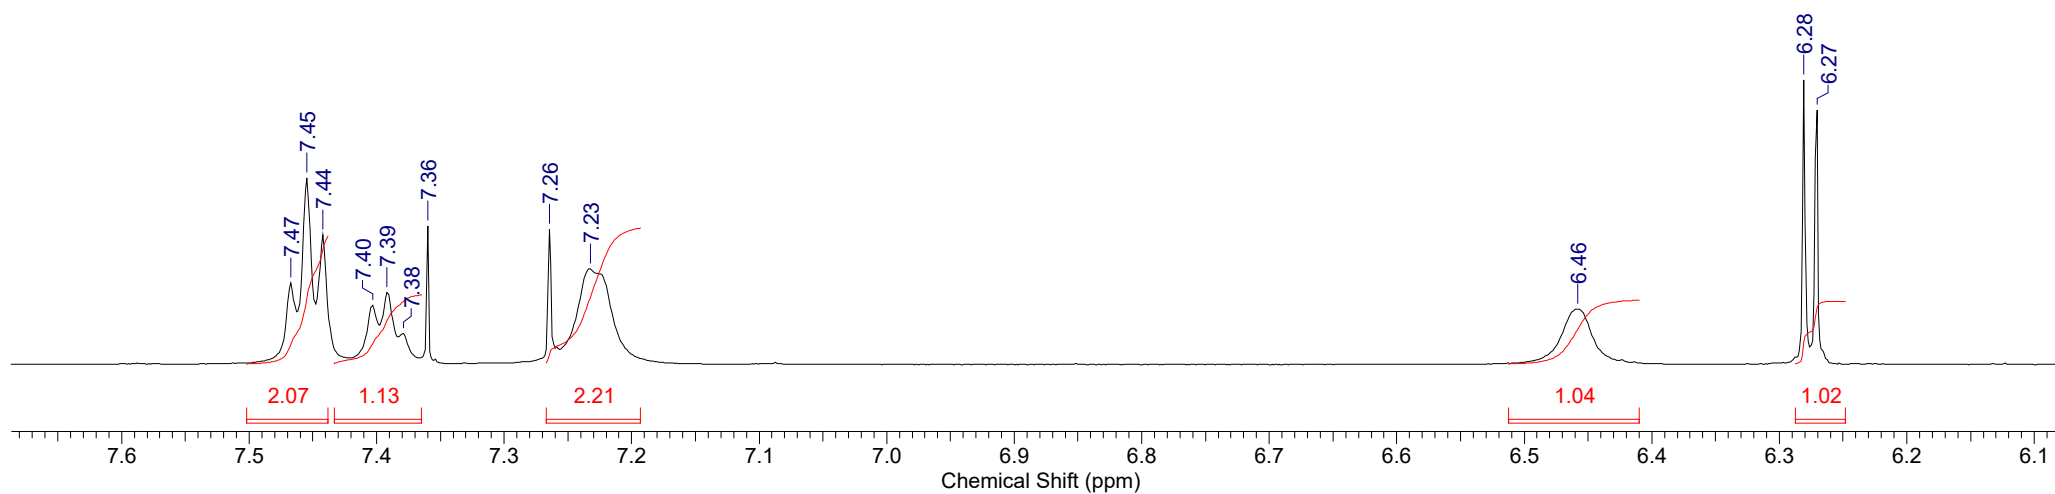

|                                                                              |                    |
|------------------------------------------------------------------------------|--------------------|
| <b>Formula</b> C <sub>25</sub> H <sub>26</sub> N <sub>2</sub> O <sub>6</sub> | <b>FW</b> 450.4837 |
|------------------------------------------------------------------------------|--------------------|

|                                        |                                        |                                                         |                               |
|----------------------------------------|----------------------------------------|---------------------------------------------------------|-------------------------------|
| <b>Acquisition Time (sec)</b> 1.4549   | <b>Comment</b> single_pulse            | <b>Date</b> 28 Mar 2013 09:31:44                        |                               |
| <b>Date Stamp</b> 28 Mar 2013 08:43:48 |                                        | <b>File Name</b> C:\USERS\Лаб534\DOWNLOADS\FZ2892-1.JDF | <b>Frequency (MHz)</b> 600.17 |
| <b>Nucleus</b> 1H                      | <b>Number of Transients</b> 8          | <b>Origin</b> ECA 600                                   | <b>Owner</b> delta            |
| <b>Points Count</b> 16384              | <b>Pulse Sequence</b> single_pulse.ex2 | <b>Original Points Count</b> 16384                      | <b>Receiver Gain</b> 30.00    |
| <b>Spectrum Offset (Hz)</b> 3009.6707  | <b>Sweep Width (Hz)</b> 11261.26       | <b>Temperature (degree C)</b> 26.600                    | <b>Solvent</b> CHLOROFORM-d   |

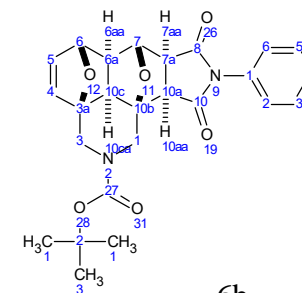

FZ2892-1.JDF

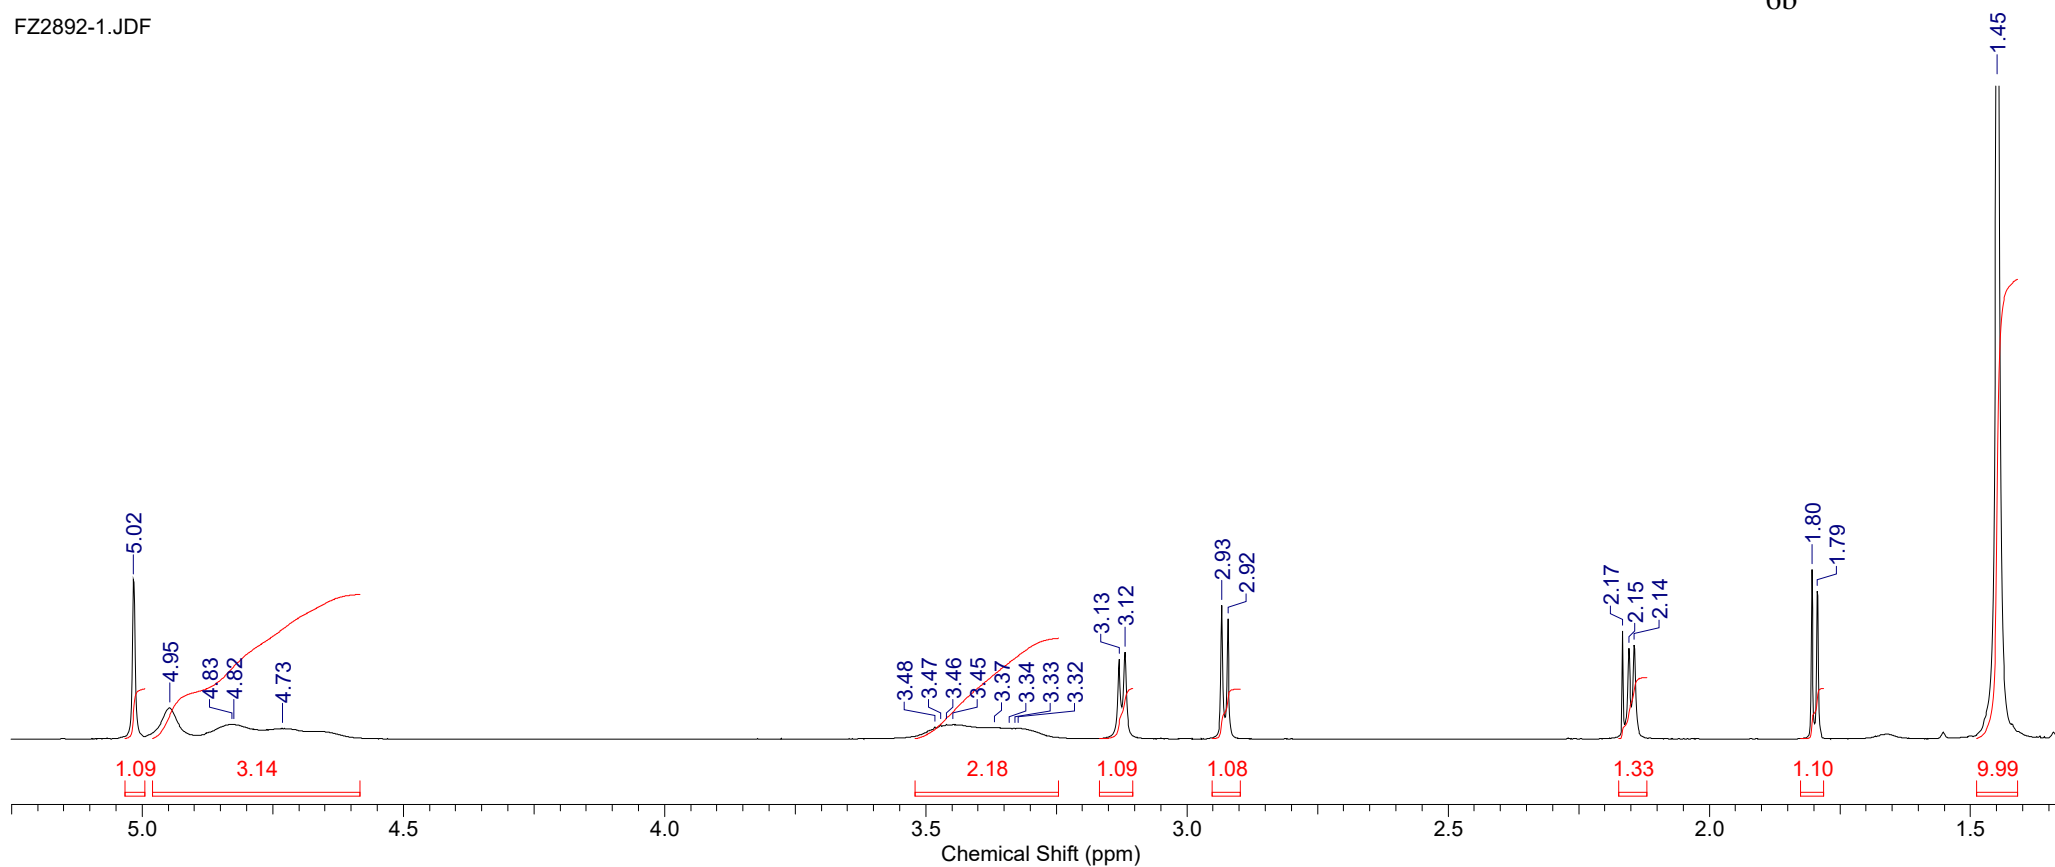

Formula  $C_{25}H_{26}N_2O_6$  FW 450.4837

|                        |                      |                        |                                         |                      |                      |
|------------------------|----------------------|------------------------|-----------------------------------------|----------------------|----------------------|
| Acquisition Time (sec) | 0.6921               | Comment                | single pulse decoupled gated NOE        | Date                 | 28 Mar 2013 14:22:11 |
| Date Stamp             | 28 Mar 2013 13:34:11 | File Name              | C:\USERS\Лабa534\DOWNLOADS\FZ2902-1.JDF |                      |                      |
| Frequency (MHz)        | 150.91               | Nucleus                | 13C                                     | Number of Transients | 100                  |
| Original Points Count  | 32768                | Owner                  | delta                                   | Points Count         | 32768                |
| Receiver Gain          | 56.00                | Solvent                | CHLOROFORM-d                            | Pulse Sequence       | single pulse dec     |
| Sweep Width (Hz)       | 47348.49             | Temperature (degree C) | 27.000                                  | Spectrum Offset (Hz) | 15091.3428           |

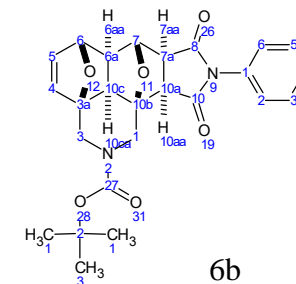

FZ2902-1.JDF

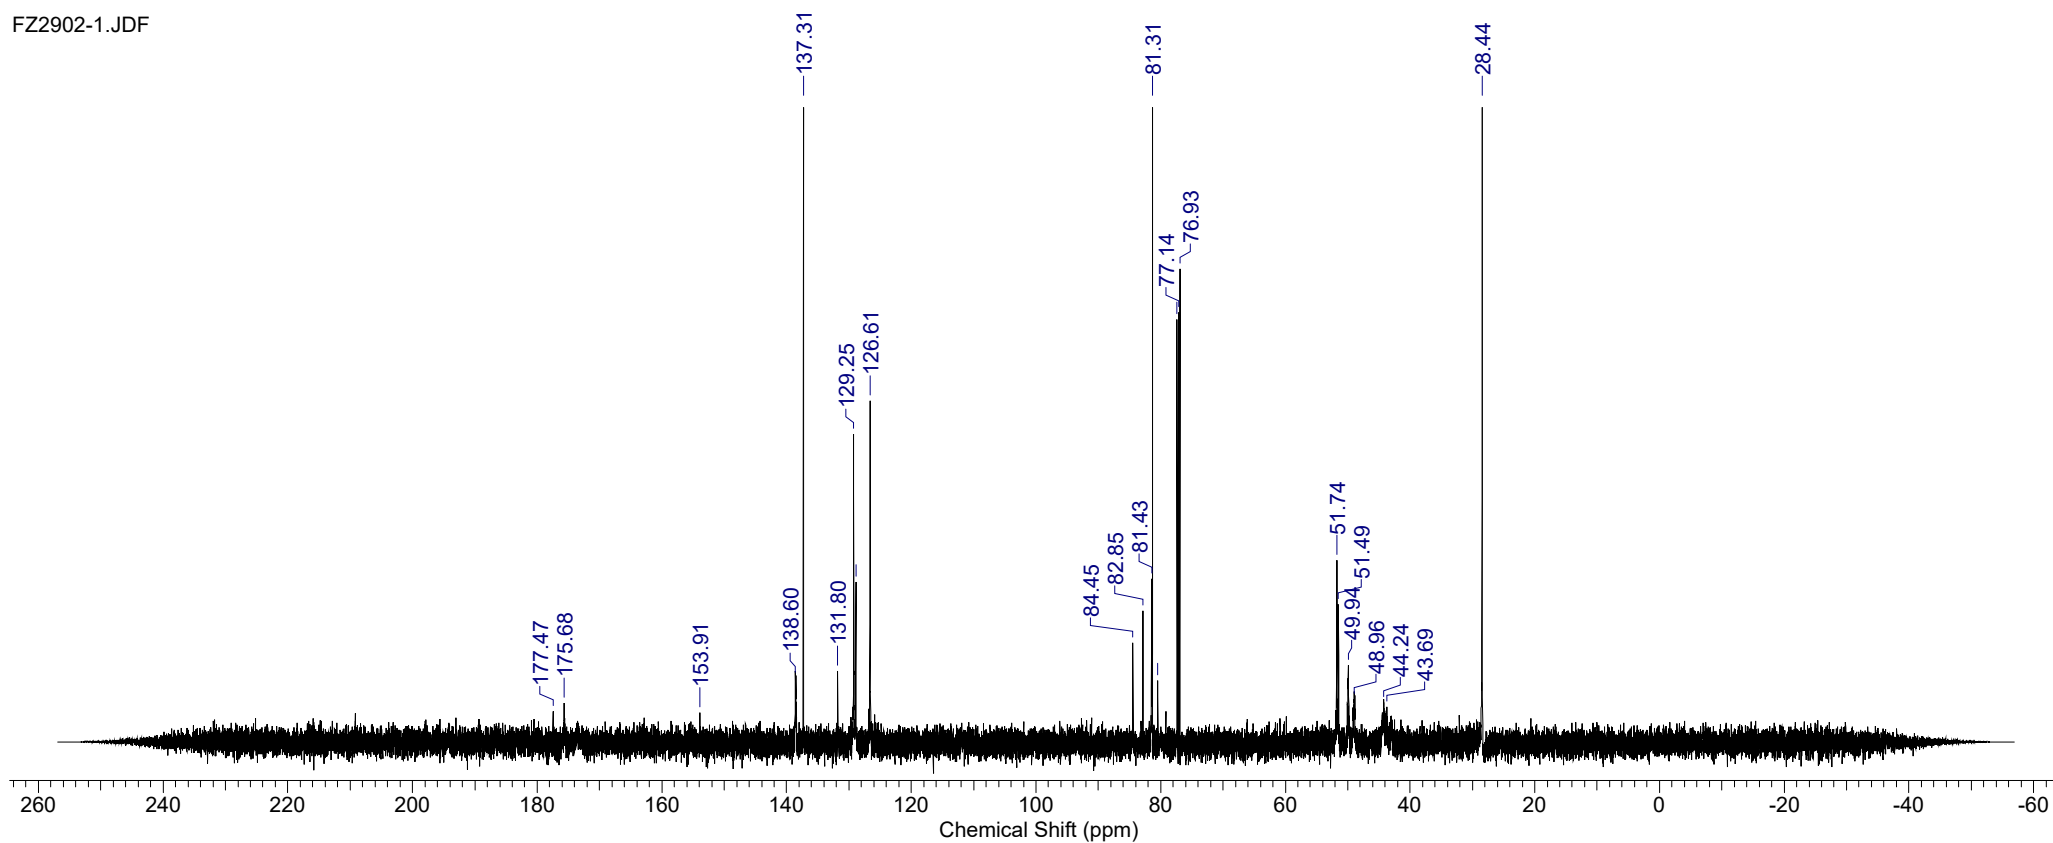





Formula C<sub>25</sub>H<sub>26</sub>N<sub>2</sub>O<sub>6</sub> FW 450.4837

|                        |                      |                        |                                         |                      |                      |
|------------------------|----------------------|------------------------|-----------------------------------------|----------------------|----------------------|
| Acquisition Time (sec) | 0.6921               | Comment                | single pulse decoupled gated NOE        | Date                 | 28 Mar 2013 14:22:11 |
| Date Stamp             | 28 Mar 2013 13:34:11 | File Name              | C:\USERS\Лабa534\DOWNLOADS\FZ2902-1.JDF |                      |                      |
| Frequency (MHz)        | 150.91               | Nucleus                | 13C                                     | Number of Transients | 100                  |
| Original Points Count  | 32768                | Owner                  | delta                                   | Points Count         | 32768                |
| Receiver Gain          | 56.00                | Solvent                | CHLOROFORM-d                            | Pulse Sequence       | single pulse dec     |
| Sweep Width (Hz)       | 47348.49             | Temperature (degree C) | 27.000                                  | Spectrum Offset (Hz) | 15091.3428           |

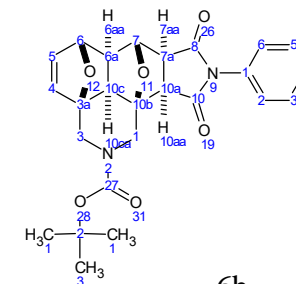

FZ2902-1.JDF

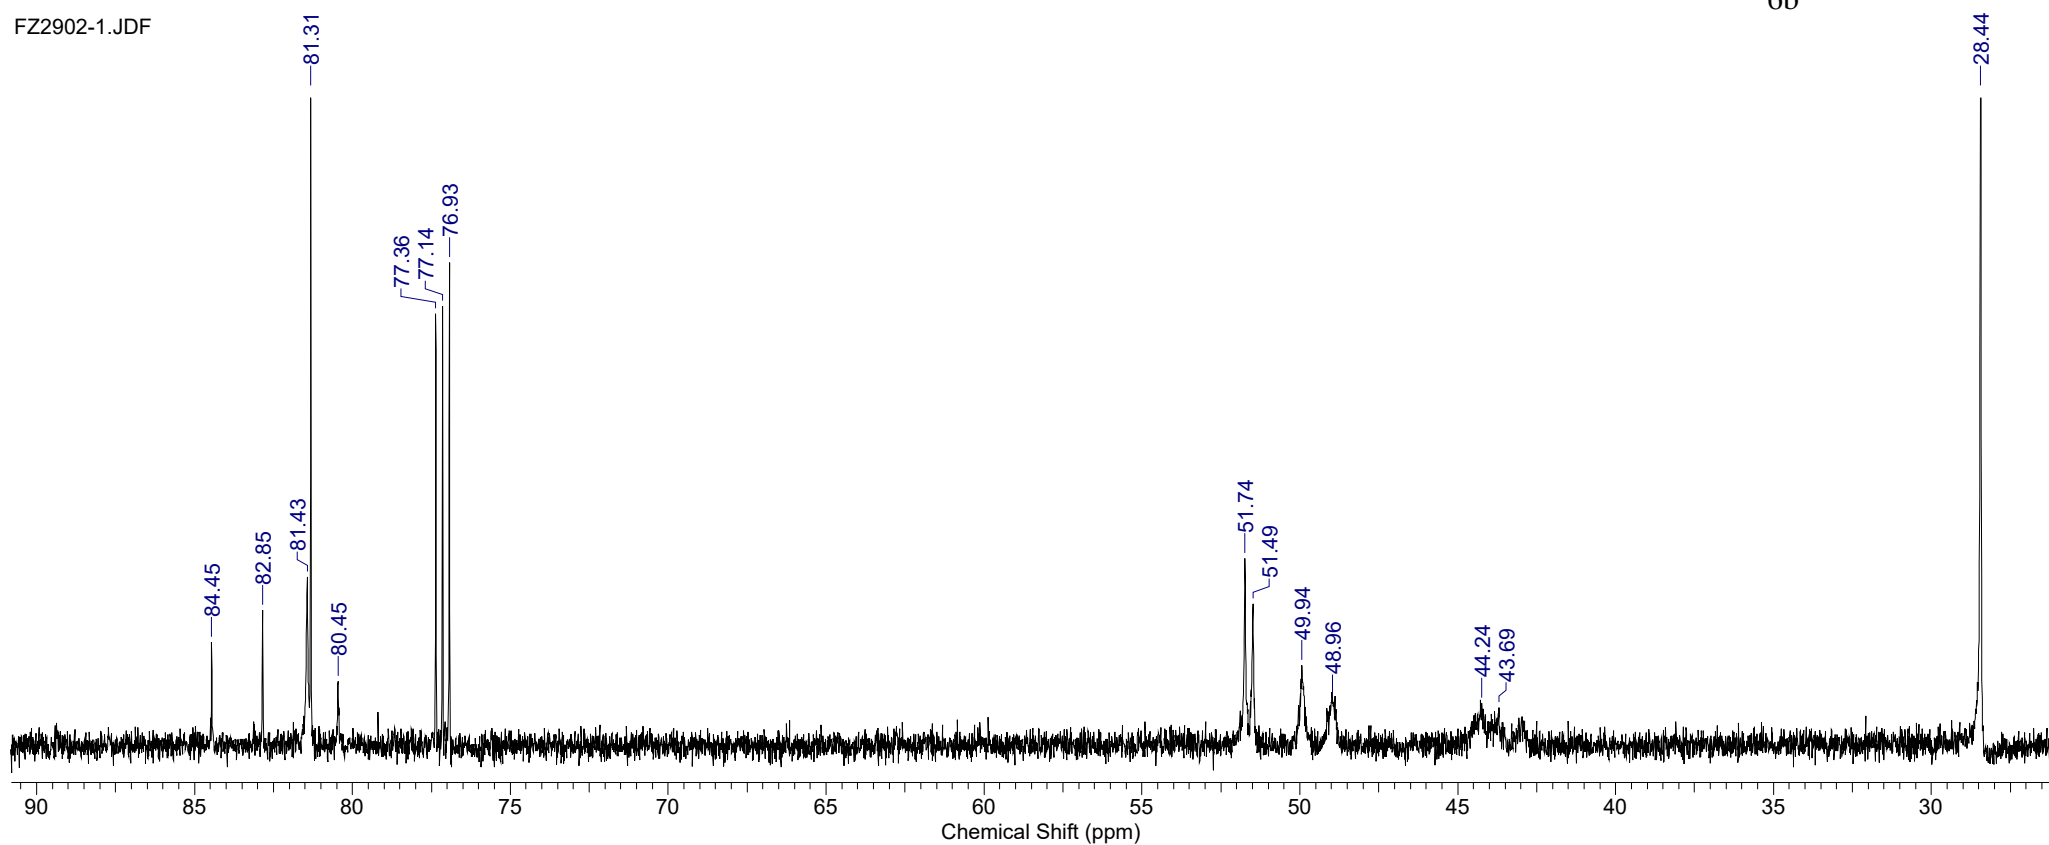

|                                                                              |                    |
|------------------------------------------------------------------------------|--------------------|
| <b>Formula</b> C <sub>22</sub> H <sub>20</sub> N <sub>2</sub> O <sub>6</sub> | <b>FW</b> 408.4040 |
|------------------------------------------------------------------------------|--------------------|

|                                        |                                        |                                                           |                                    |                             |
|----------------------------------------|----------------------------------------|-----------------------------------------------------------|------------------------------------|-----------------------------|
| <b>Acquisition Time (sec)</b> 2.4222   | <b>Comment</b> single_pulse            | <b>Date</b> 05 May 2015 13:00:09                          |                                    |                             |
| <b>Date Stamp</b> 05 May 2015 12:06:38 |                                        | <b>File Name</b> C:\USERS\jta6a534\DOWNLOADS\FZ4261-1.JDF | <b>Frequency (MHz)</b> 600.17      |                             |
| <b>Nucleus</b> 1H                      | <b>Number of Transients</b> 8          | <b>Origin</b> ECA 600                                     | <b>Original Points Count</b> 32768 | <b>Owner</b> delta          |
| <b>Points Count</b> 32768              | <b>Pulse Sequence</b> single_pulse.ex2 |                                                           | <b>Receiver Gain</b> 34.00         | <b>Solvent</b> CHLOROFORM-d |
| <b>Spectrum Offset (Hz)</b> 3611.0679  | <b>Sweep Width (Hz)</b> 13528.14       | <b>Temperature (degree C)</b> 20.700                      |                                    |                             |

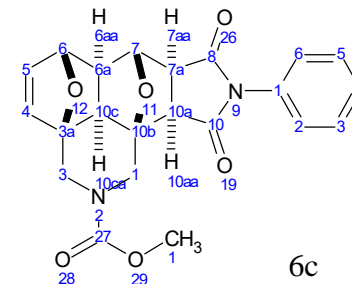

FZ4261-1.JDF

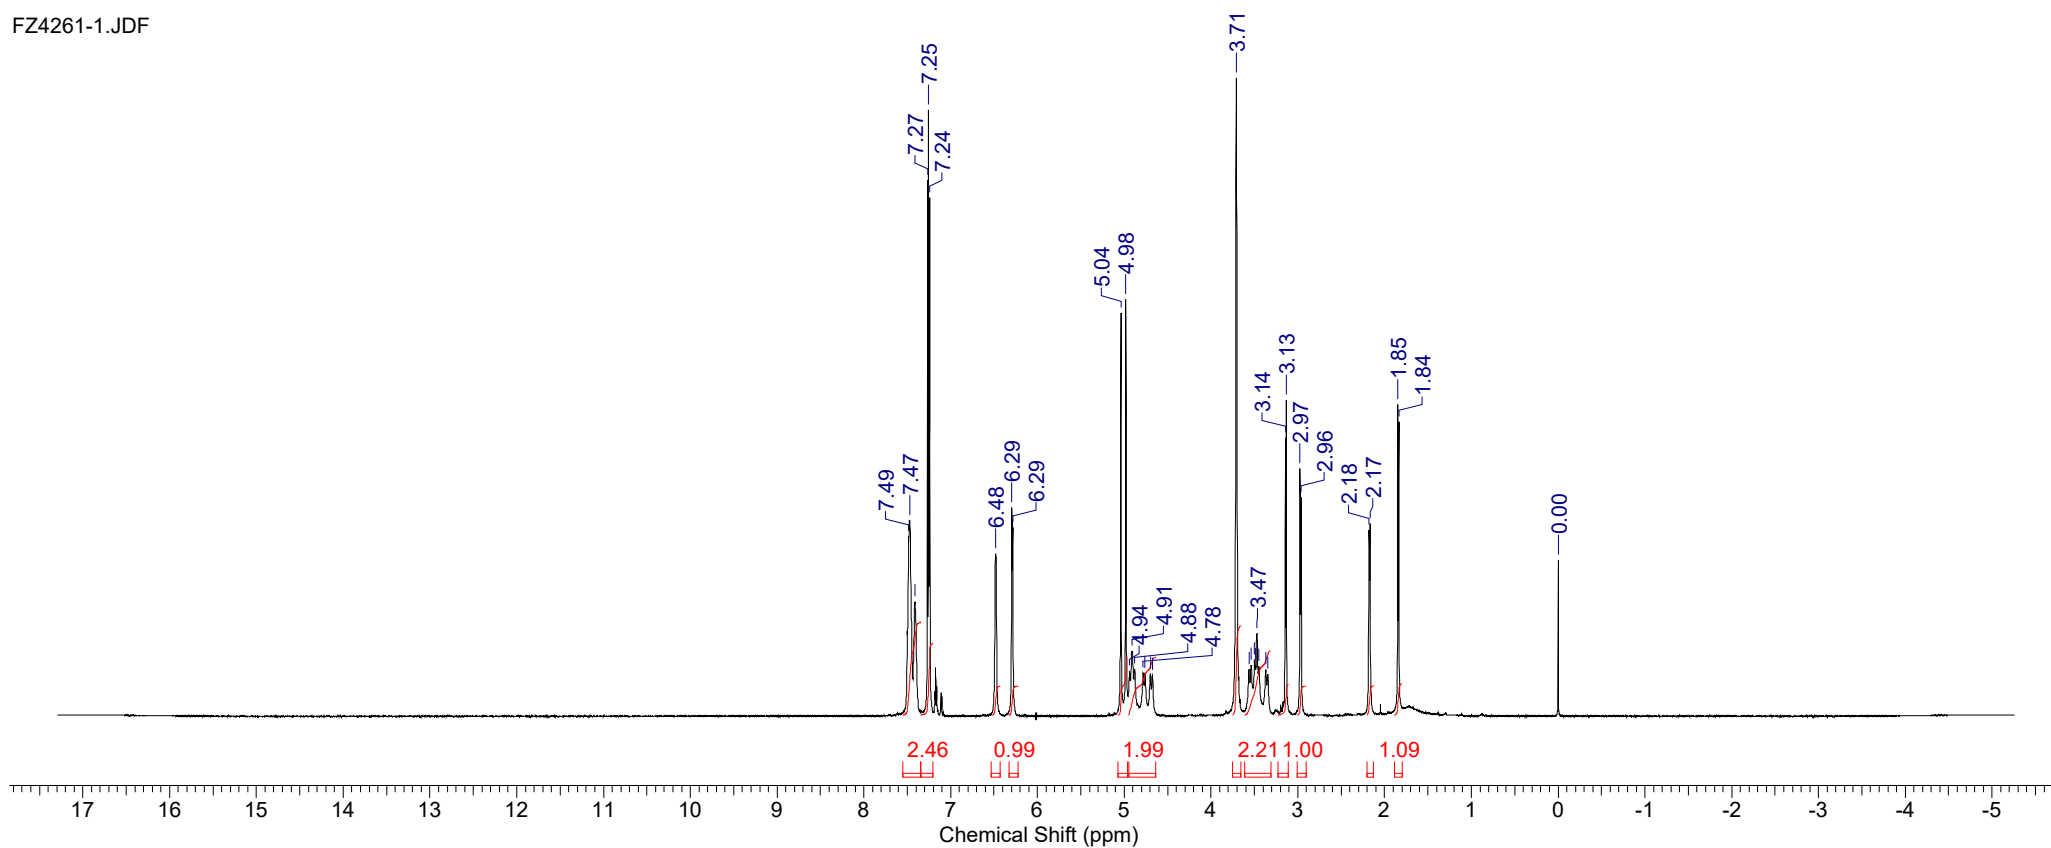

|                                                                              |                    |
|------------------------------------------------------------------------------|--------------------|
| <b>Formula</b> C <sub>22</sub> H <sub>20</sub> N <sub>2</sub> O <sub>6</sub> | <b>FW</b> 408.4040 |
|------------------------------------------------------------------------------|--------------------|

|                                        |                                                           |                                      |                               |
|----------------------------------------|-----------------------------------------------------------|--------------------------------------|-------------------------------|
| <b>Acquisition Time (sec)</b> 2.4222   | <b>Comment</b> single_pulse                               | <b>Date</b> 05 May 2015 13:00:09     | <b>Frequency (MHz)</b> 600.17 |
| <b>Date Stamp</b> 05 May 2015 12:06:38 | <b>File Name</b> C:\USERS\I\аба534\DOWNLOADS\FZ4261-1.JDF | <b>Original Points Count</b> 32768   | <b>Owner</b> delta            |
| <b>Nucleus</b> 1H                      | <b>Number of Transients</b> 8                             | <b>Origin</b> ECA 600                | <b>Solvent</b> CHLOROFORM-d   |
| <b>Points Count</b> 32768              | <b>Pulse Sequence</b> single_pulse.ex2                    | <b>Receiver Gain</b> 34.00           |                               |
| <b>Spectrum Offset (Hz)</b> 3611.0679  | <b>Sweep Width (Hz)</b> 13528.14                          | <b>Temperature (degree C)</b> 20.700 |                               |

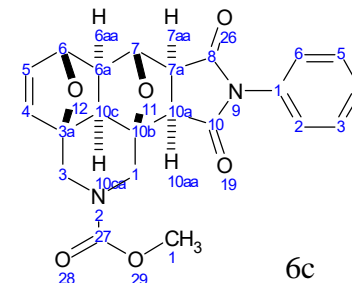

FZ4261-1.JDF

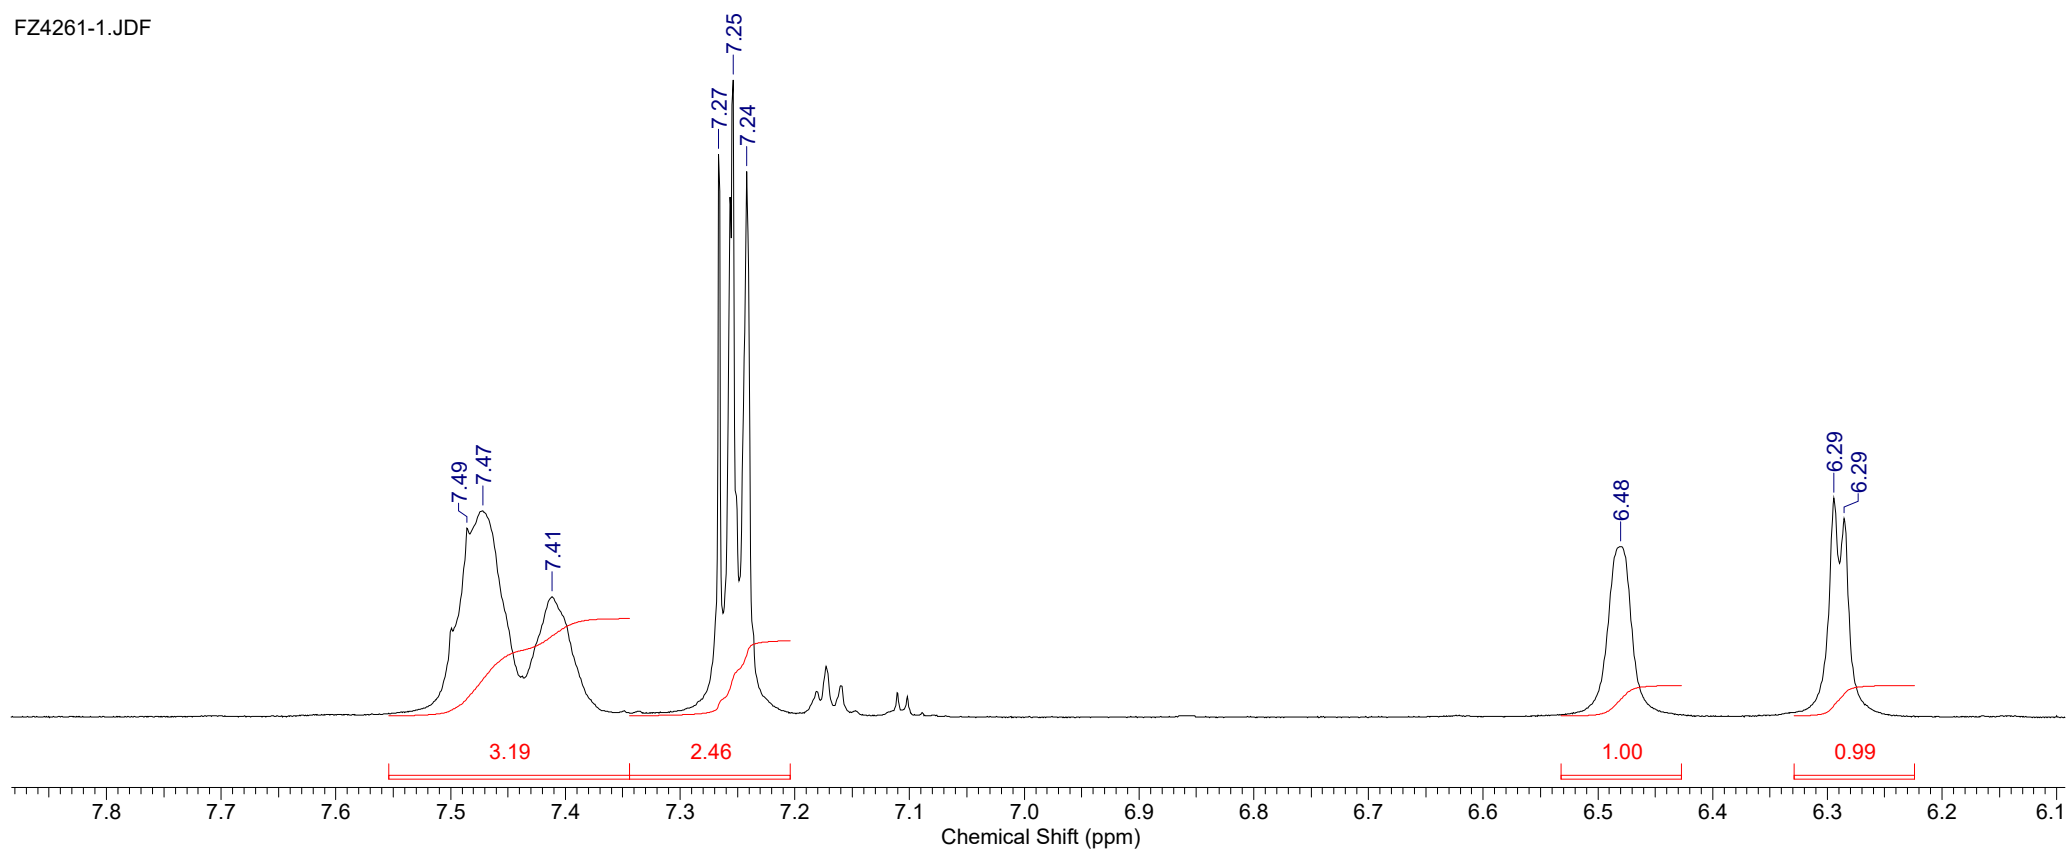

Formula C<sub>22</sub>H<sub>20</sub>N<sub>2</sub>O<sub>6</sub> FW 408.4040

|                        |                      |                      |                                         |                        |                      |                       |              |
|------------------------|----------------------|----------------------|-----------------------------------------|------------------------|----------------------|-----------------------|--------------|
| Acquisition Time (sec) | 2.4222               | Comment              | single_pulse                            | Date                   | 05 May 2015 13:00:09 | Frequency (MHz)       | 600.17       |
| Date Stamp             | 05 May 2015 12:06:38 | File Name            | C:\USERS\Лабa534\DOWNLOADS\FZ4261-1.JDF |                        |                      | Owner                 | delta        |
| Nucleus                | 1H                   | Number of Transients | 8                                       | Origin                 | ECA 600              | Original Points Count | 32768        |
| Points Count           | 32768                | Pulse Sequence       | single_pulse.ex2                        | Receiver Gain          | 34.00                | Solvent               | CHLOROFORM-d |
| Spectrum Offset (Hz)   | 3611.0679            | Sweep Width (Hz)     | 13528.14                                | Temperature (degree C) | 20.700               |                       |              |

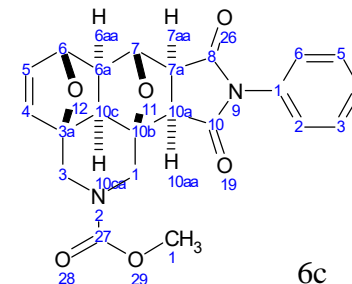

FZ4261-1.JDF

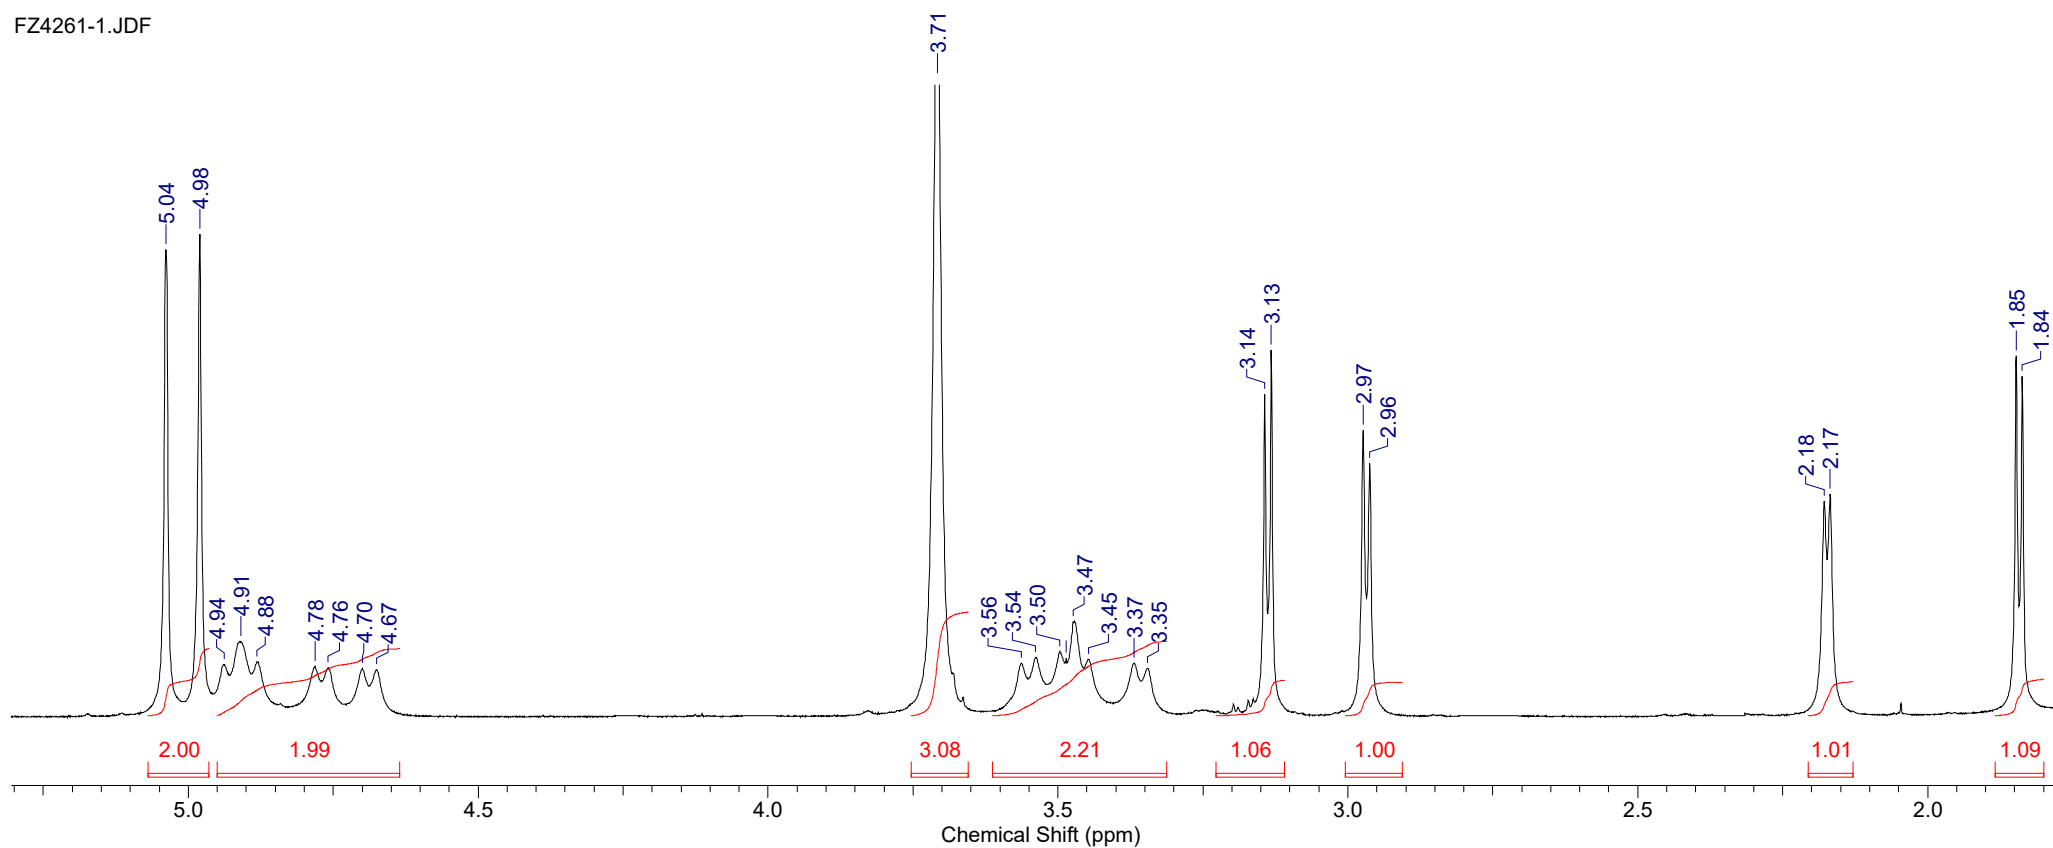

|                                                                              |                    |
|------------------------------------------------------------------------------|--------------------|
| <b>Formula</b> C <sub>22</sub> H <sub>20</sub> N <sub>2</sub> O <sub>6</sub> | <b>FW</b> 408.4040 |
|------------------------------------------------------------------------------|--------------------|

|                                        |                                                          |                                        |
|----------------------------------------|----------------------------------------------------------|----------------------------------------|
| <b>Acquisition Time (sec)</b> 0.6921   | <b>Comment</b> single pulse decoupled gated NOE          | <b>Date</b> 05 May 2015 10:45:38       |
| <b>Date Stamp</b> 05 May 2015 09:52:07 | <b>File Name</b> C:\USERS\Лабa534\DOWNLOADS\FZ4262-1.JDF |                                        |
| <b>Frequency (MHz)</b> 150.91          | <b>Nucleus</b> 13C                                       | <b>Number of Transients</b> 100        |
| <b>Original Points Count</b> 32768     | <b>Owner</b> delta                                       | <b>Points Count</b> 32768              |
| <b>Receiver Gain</b> 52.00             | <b>Solvent</b> CHLOROFORM-d                              | <b>Pulse Sequence</b> single pulse dec |
| <b>Sweep Width (Hz)</b> 47348.49       | <b>Temperature (degree C)</b> 20.900                     | <b>Spectrum Offset (Hz)</b> 15091.3428 |

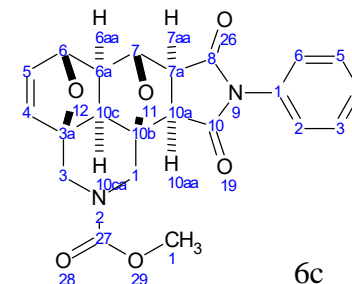

FZ4262-1.JDF

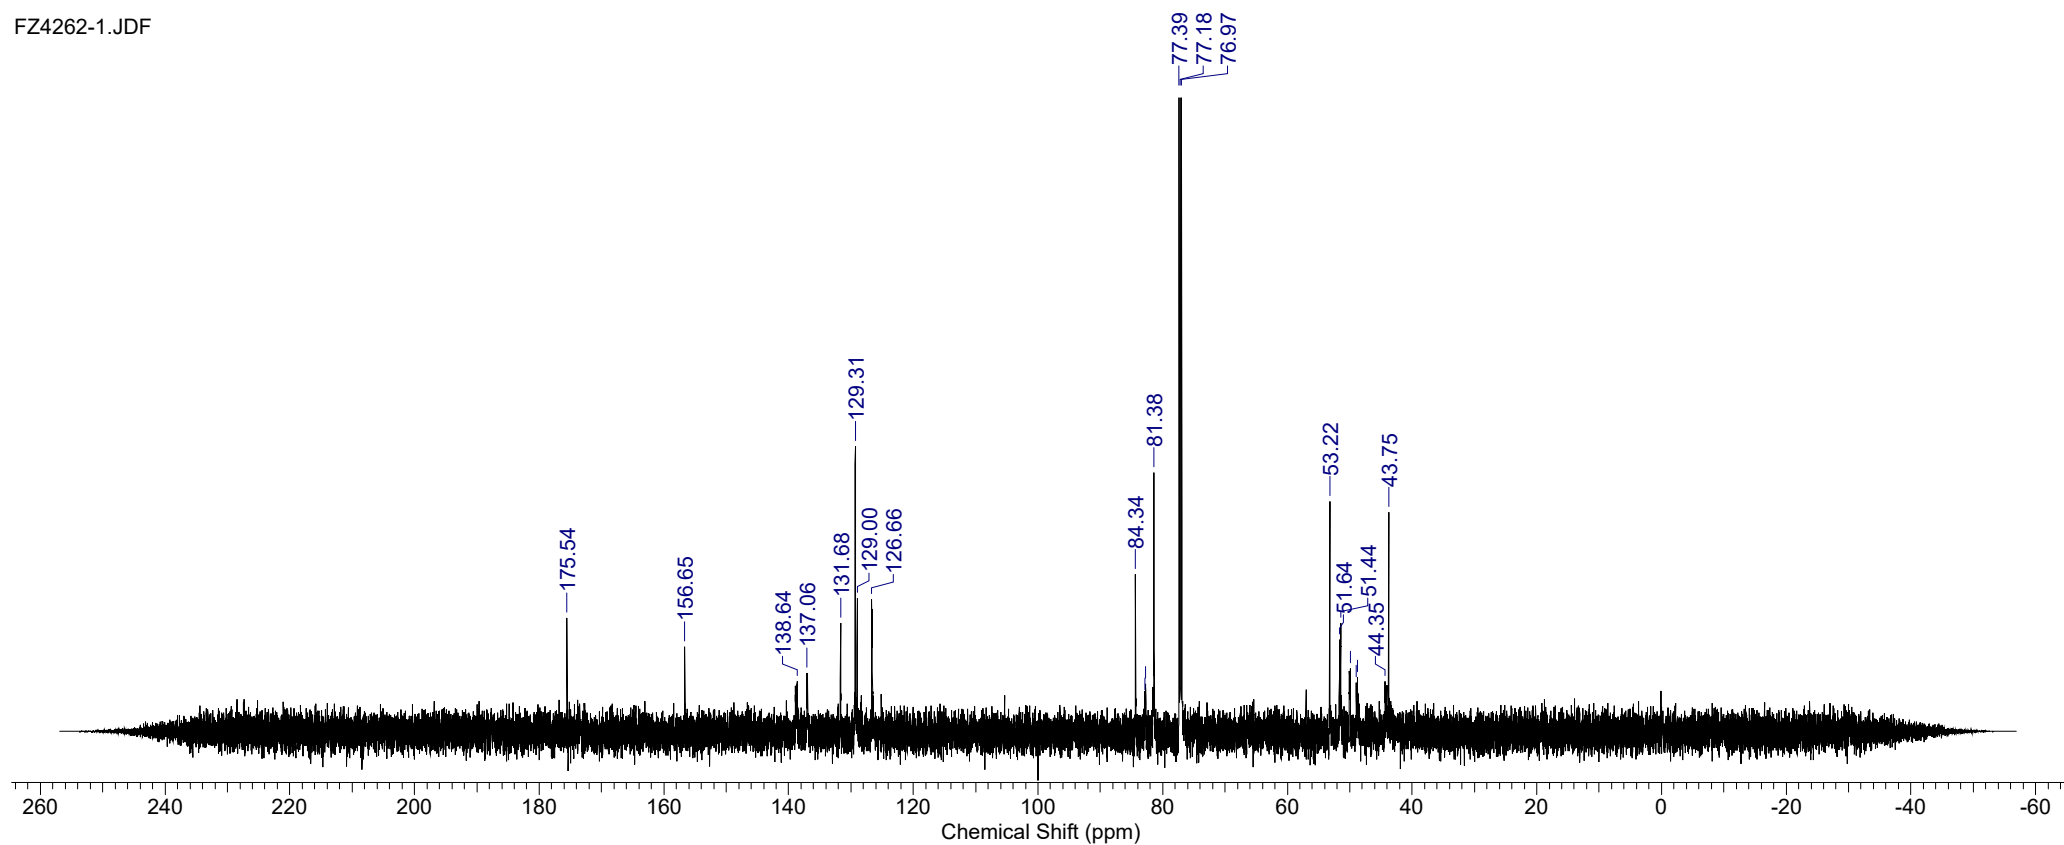

|                                                                              |                    |
|------------------------------------------------------------------------------|--------------------|
| <b>Formula</b> C <sub>22</sub> H <sub>20</sub> N <sub>2</sub> O <sub>6</sub> | <b>FW</b> 408.4040 |
|------------------------------------------------------------------------------|--------------------|

|                                        |                                                          |                                        |
|----------------------------------------|----------------------------------------------------------|----------------------------------------|
| <b>Acquisition Time (sec)</b> 0.6921   | <b>Comment</b> single pulse decoupled gated NOE          | <b>Date</b> 05 May 2015 10:45:38       |
| <b>Date Stamp</b> 05 May 2015 09:52:07 | <b>File Name</b> C:\USERS\Лабa534\DOWNLOADS\FZ4262-1.JDF |                                        |
| <b>Frequency (MHz)</b> 150.91          | <b>Nucleus</b> 13C                                       | <b>Number of Transients</b> 100        |
| <b>Original Points Count</b> 32768     | <b>Owner</b> delta                                       | <b>Points Count</b> 32768              |
| <b>Receiver Gain</b> 52.00             | <b>Solvent</b> CHLOROFORM-d                              | <b>Pulse Sequence</b> single pulse dec |
| <b>Sweep Width (Hz)</b> 47348.49       | <b>Temperature (degree C)</b> 20.900                     | <b>Spectrum Offset (Hz)</b> 15091.3428 |

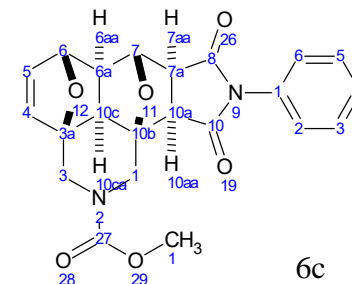

FZ4262-1.JDF

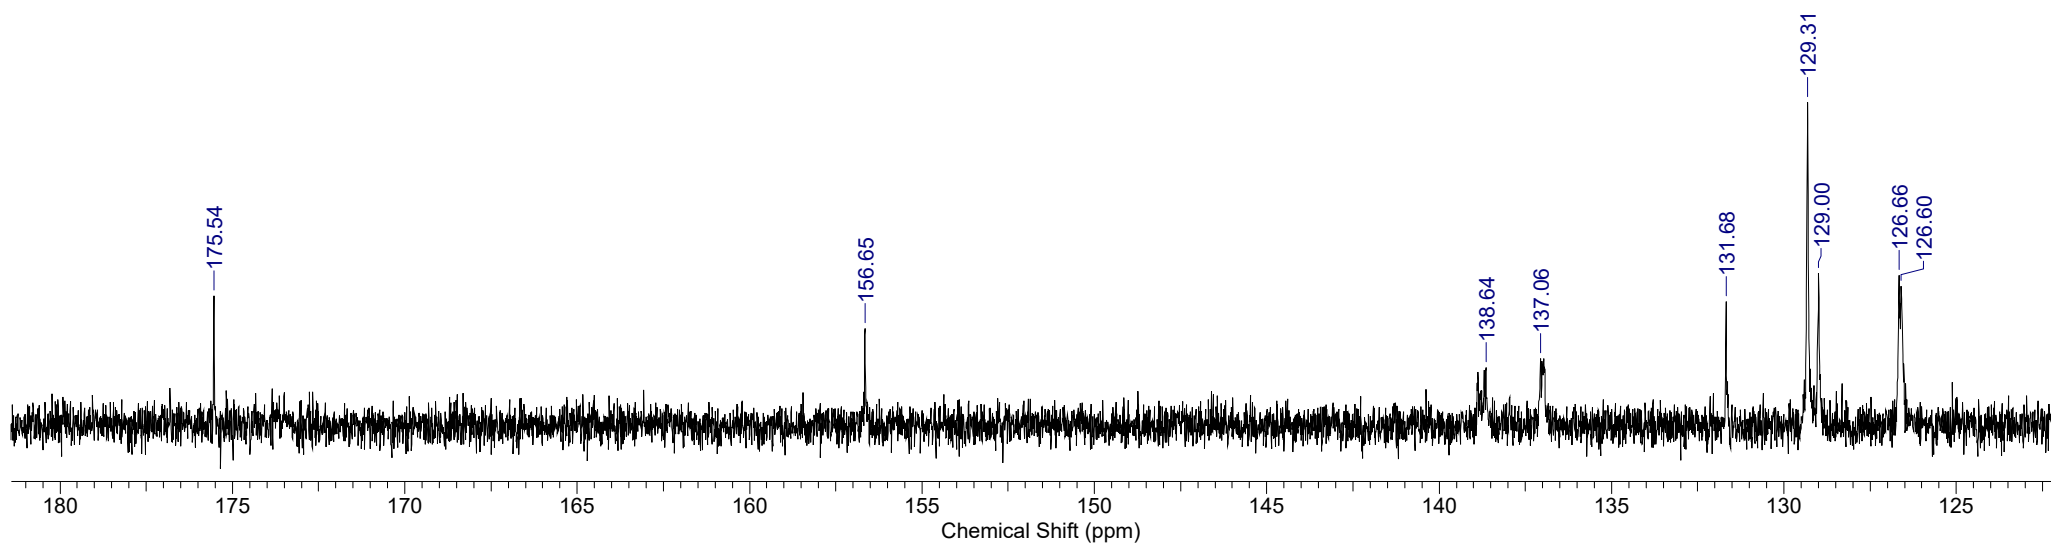

|                                                                              |                    |
|------------------------------------------------------------------------------|--------------------|
| <b>Formula</b> C <sub>22</sub> H <sub>20</sub> N <sub>2</sub> O <sub>6</sub> | <b>FW</b> 408.4040 |
|------------------------------------------------------------------------------|--------------------|

|                               |                      |                               |                                         |                             |                      |
|-------------------------------|----------------------|-------------------------------|-----------------------------------------|-----------------------------|----------------------|
| <b>Acquisition Time (sec)</b> | 0.6921               | <b>Comment</b>                | single pulse decoupled gated NOE        | <b>Date</b>                 | 05 May 2015 10:45:38 |
| <b>Date Stamp</b>             | 05 May 2015 09:52:07 | <b>File Name</b>              | C:\USERS\Лабa534\DOWNLOADS\FZ4262-1.JDF |                             |                      |
| <b>Frequency (MHz)</b>        | 150.91               | <b>Nucleus</b>                | 13C                                     | <b>Number of Transients</b> | 100                  |
| <b>Original Points Count</b>  | 32768                | <b>Owner</b>                  | delta                                   | <b>Points Count</b>         | 32768                |
| <b>Receiver Gain</b>          | 52.00                | <b>Solvent</b>                | CHLOROFORM-d                            | <b>Pulse Sequence</b>       | single pulse dec     |
| <b>Sweep Width (Hz)</b>       | 47348.49             | <b>Temperature (degree C)</b> | 20.900                                  | <b>Spectrum Offset (Hz)</b> | 15091.3428           |

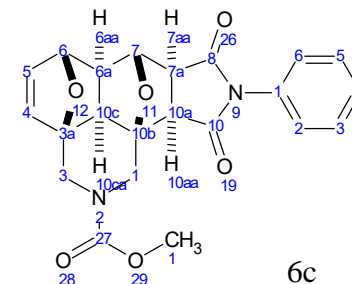

FZ4262-1.JDF

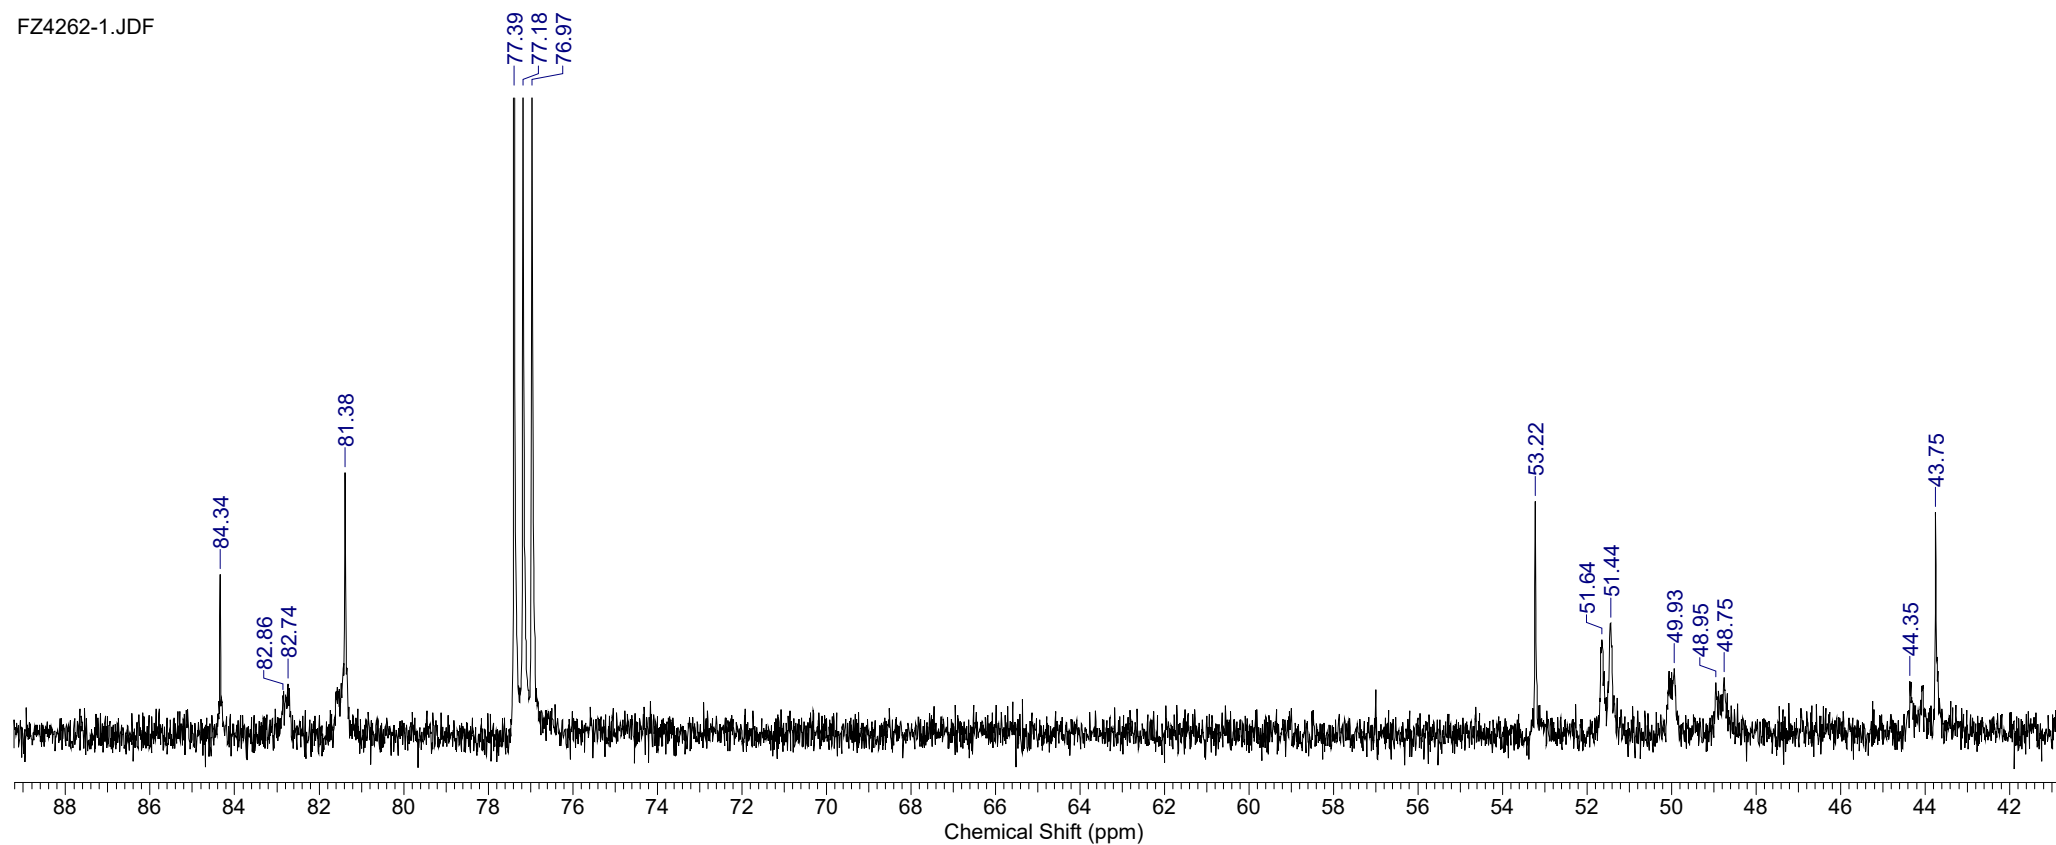

|                                                                                             |                    |
|---------------------------------------------------------------------------------------------|--------------------|
| <b>Formula</b> C <sub>22</sub> H <sub>17</sub> F <sub>3</sub> N <sub>2</sub> O <sub>5</sub> | <b>FW</b> 446.3760 |
|---------------------------------------------------------------------------------------------|--------------------|

|                                                          |                                    |                                       |                                        |
|----------------------------------------------------------|------------------------------------|---------------------------------------|----------------------------------------|
| <b>Acquisition Time (sec)</b> 1.2111                     | <b>Comment</b> single_pulse        | <b>Date</b> 22 Jan 1990 12:02:12      | <b>Date Stamp</b> 31 Mar 2016 08:06:13 |
| <b>File Name</b> C:\USERS\laba534\DOWNLOADS\FZ5110-1.JDF | <b>Frequency (MHz)</b> 600.17      | <b>Nucleus</b> 1H                     | <b>Number of Transients</b> 8          |
| <b>Origin</b> ECA 600                                    | <b>Original Points Count</b> 16384 | <b>Owner</b> delta                    | <b>Points Count</b> 16384              |
| <b>Receiver Gain</b> 38.00                               | <b>Solvent</b> DMSO-d6             | <b>Spectrum Offset (Hz)</b> 3622.9451 | <b>Sweep Width (Hz)</b> 13528.14       |
|                                                          |                                    |                                       | <b>Temperature (degree C)</b> 22.400   |

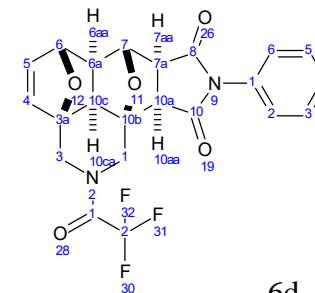

FZ5110-1 COCF3 C N-PH.ESP

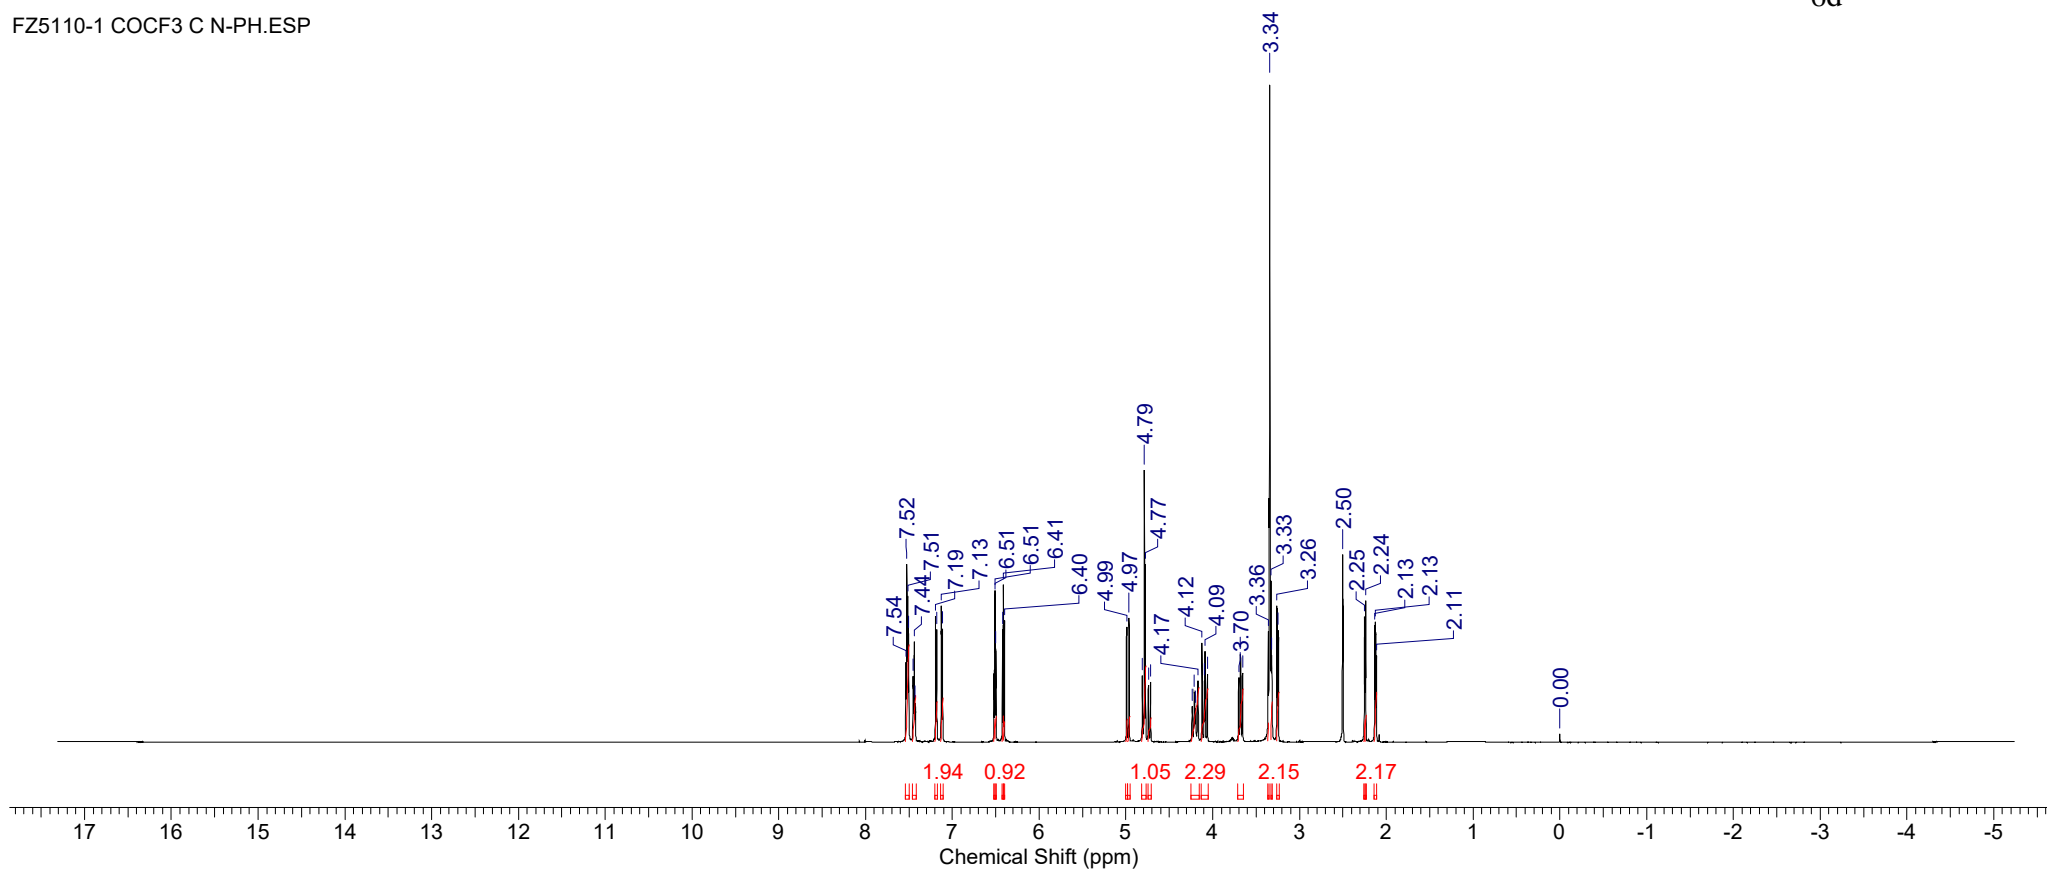



|                                                                                             |                    |
|---------------------------------------------------------------------------------------------|--------------------|
| <b>Formula</b> C <sub>22</sub> H <sub>17</sub> F <sub>3</sub> N <sub>3</sub> O <sub>5</sub> | <b>FW</b> 446.3760 |
|---------------------------------------------------------------------------------------------|--------------------|

|                                                          |                                    |                                       |                                        |
|----------------------------------------------------------|------------------------------------|---------------------------------------|----------------------------------------|
| <b>Acquisition Time (sec)</b> 1.2111                     | <b>Comment</b> single_pulse        | <b>Date</b> 22 Jan 1990 12:02:12      | <b>Date Stamp</b> 31 Mar 2016 08:06:13 |
| <b>File Name</b> C:\USERS\laba534\DOWNLOADS\FZ5110-1.JDF | <b>Frequency (MHz)</b> 600.17      | <b>Nucleus</b> 1H                     | <b>Number of Transients</b> 8          |
| <b>Origin</b> ECA 600                                    | <b>Original Points Count</b> 16384 | <b>Owner</b> delta                    | <b>Points Count</b> 16384              |
| <b>Receiver Gain</b> 38.00                               | <b>Solvent</b> DMSO-d6             | <b>Spectrum Offset (Hz)</b> 3622.9451 | <b>Sweep Width (Hz)</b> 13528.14       |
|                                                          |                                    | <b>Temperature (degree C)</b> 22.400  |                                        |

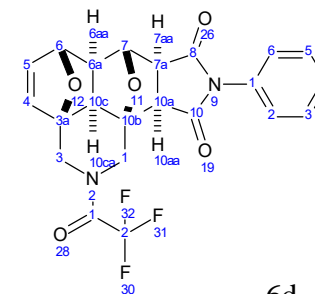

FZ5110-1 COCF3 C N-PH.ESP

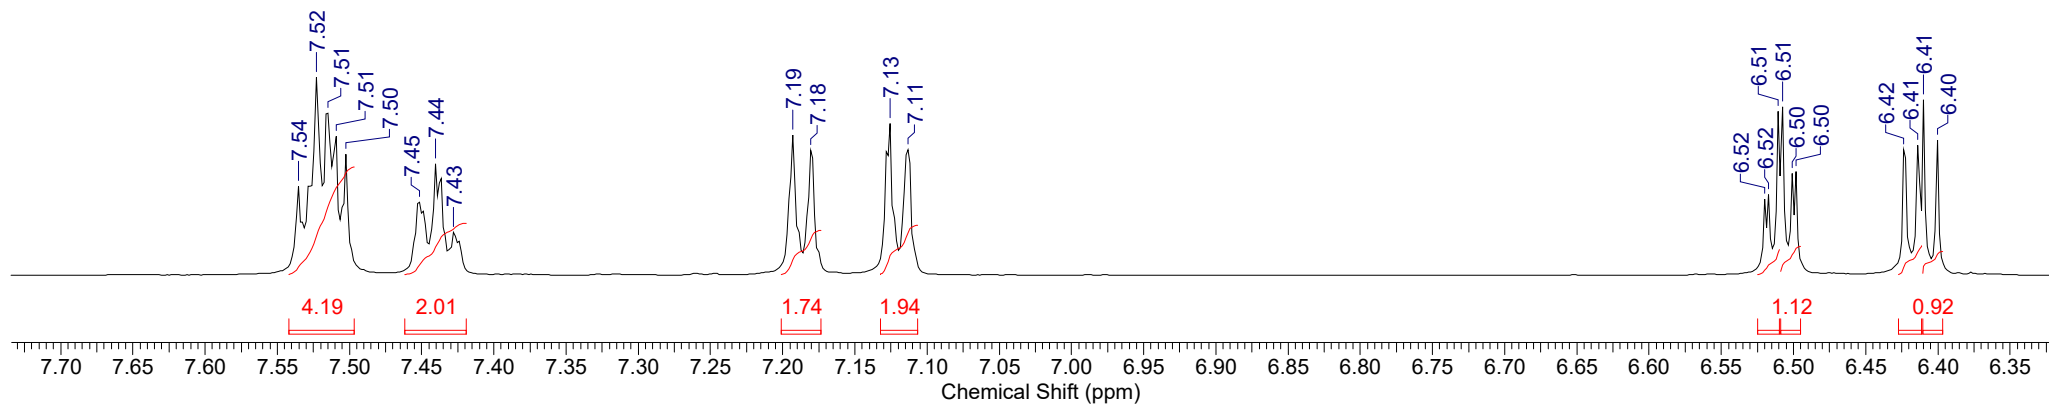

|                                                                                             |                    |
|---------------------------------------------------------------------------------------------|--------------------|
| <b>Formula</b> C <sub>22</sub> H <sub>17</sub> F <sub>3</sub> N <sub>2</sub> O <sub>5</sub> | <b>FW</b> 446.3760 |
|---------------------------------------------------------------------------------------------|--------------------|

|                                                          |                                    |                                       |                                        |
|----------------------------------------------------------|------------------------------------|---------------------------------------|----------------------------------------|
| <b>Acquisition Time (sec)</b> 1.2111                     | <b>Comment</b> single_pulse        | <b>Date</b> 22 Jan 1990 12:02:12      | <b>Date Stamp</b> 31 Mar 2016 08:06:13 |
| <b>File Name</b> C:\USERS\Лабa534\DOWNLOADS\FZ5110-1.JDF | <b>Frequency (MHz)</b> 600.17      | <b>Nucleus</b> 1H                     | <b>Number of Transients</b> 8          |
| <b>Origin</b> ECA 600                                    | <b>Original Points Count</b> 16384 | <b>Owner</b> delta                    | <b>Points Count</b> 16384              |
| <b>Receiver Gain</b> 38.00                               | <b>Solvent</b> DMSO-d6             | <b>Spectrum Offset (Hz)</b> 3622.9451 | <b>Sweep Width (Hz)</b> 13528.14       |
|                                                          |                                    |                                       | <b>Temperature (degree C)</b> 22.400   |

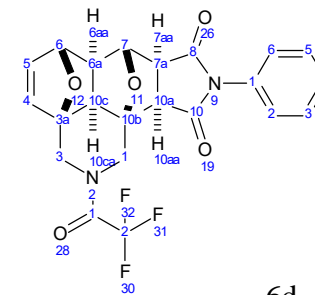

FZ5110-1 COCF3 C N-PH.ESP

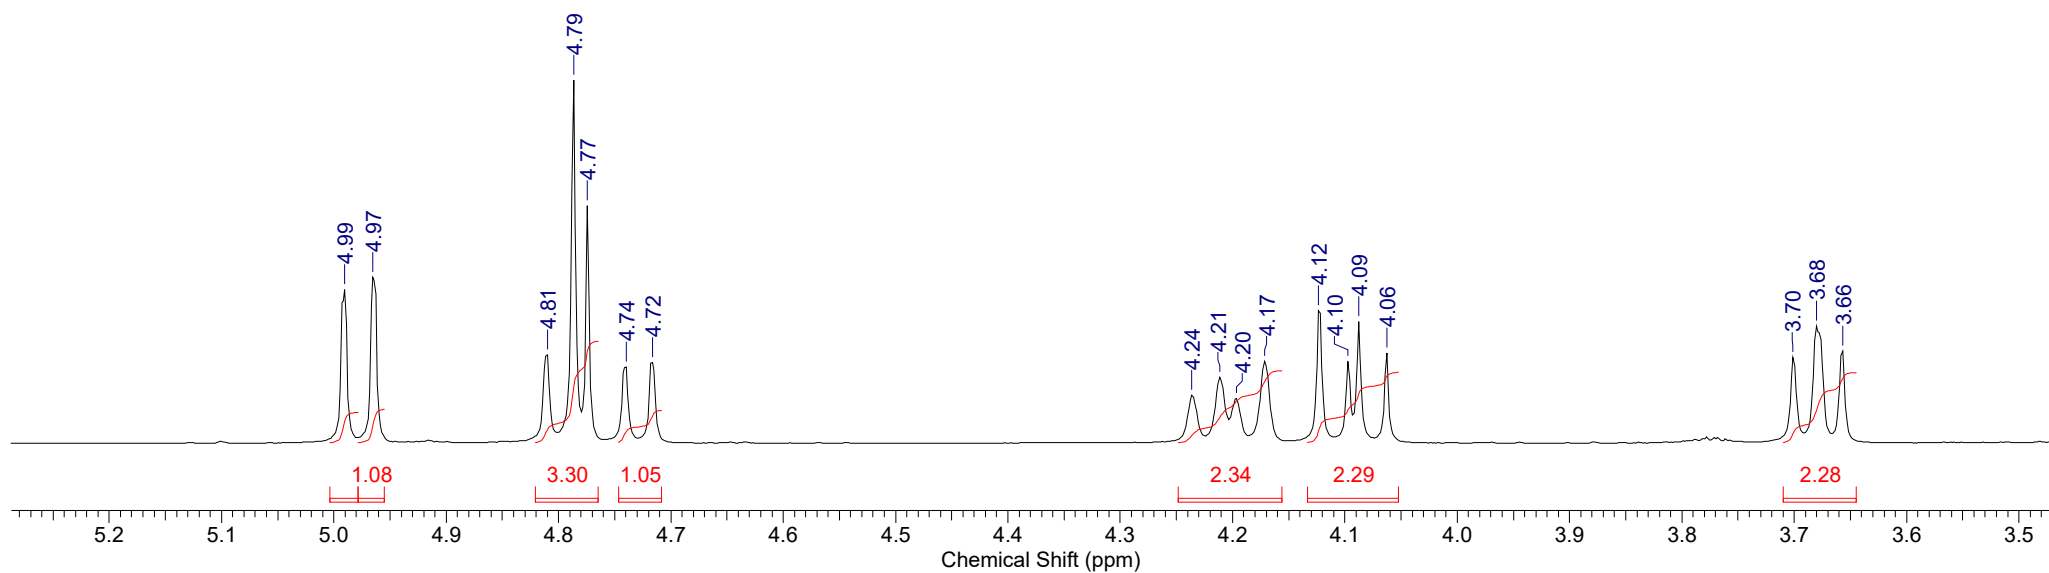

|                                                                                             |                    |
|---------------------------------------------------------------------------------------------|--------------------|
| <b>Formula</b> C <sub>22</sub> H <sub>17</sub> F <sub>3</sub> N <sub>2</sub> O <sub>5</sub> | <b>FW</b> 446.3760 |
|---------------------------------------------------------------------------------------------|--------------------|

|                                                          |                                    |                                       |                                        |
|----------------------------------------------------------|------------------------------------|---------------------------------------|----------------------------------------|
| <b>Acquisition Time (sec)</b> 1.2111                     | <b>Comment</b> single_pulse        | <b>Date</b> 22 Jan 1990 12:02:12      | <b>Date Stamp</b> 31 Mar 2016 08:06:13 |
| <b>File Name</b> C:\USERS\laba534\DOWNLOADS\FZ5110-1.JDF | <b>Frequency (MHz)</b> 600.17      | <b>Nucleus</b> 1H                     | <b>Number of Transients</b> 8          |
| <b>Origin</b> ECA 600                                    | <b>Original Points Count</b> 16384 | <b>Owner</b> delta                    | <b>Points Count</b> 16384              |
| <b>Receiver Gain</b> 38.00                               | <b>Solvent</b> DMSO-d6             | <b>Spectrum Offset (Hz)</b> 3622.9451 | <b>Sweep Width (Hz)</b> 13528.14       |
|                                                          |                                    |                                       | <b>Temperature (degree C)</b> 22.400   |

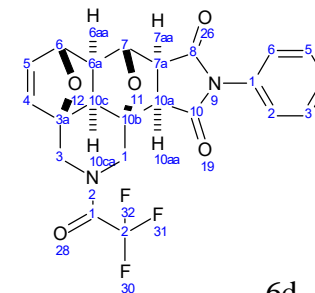

FZ5110-1 COCF3 C N-PM1.ESP

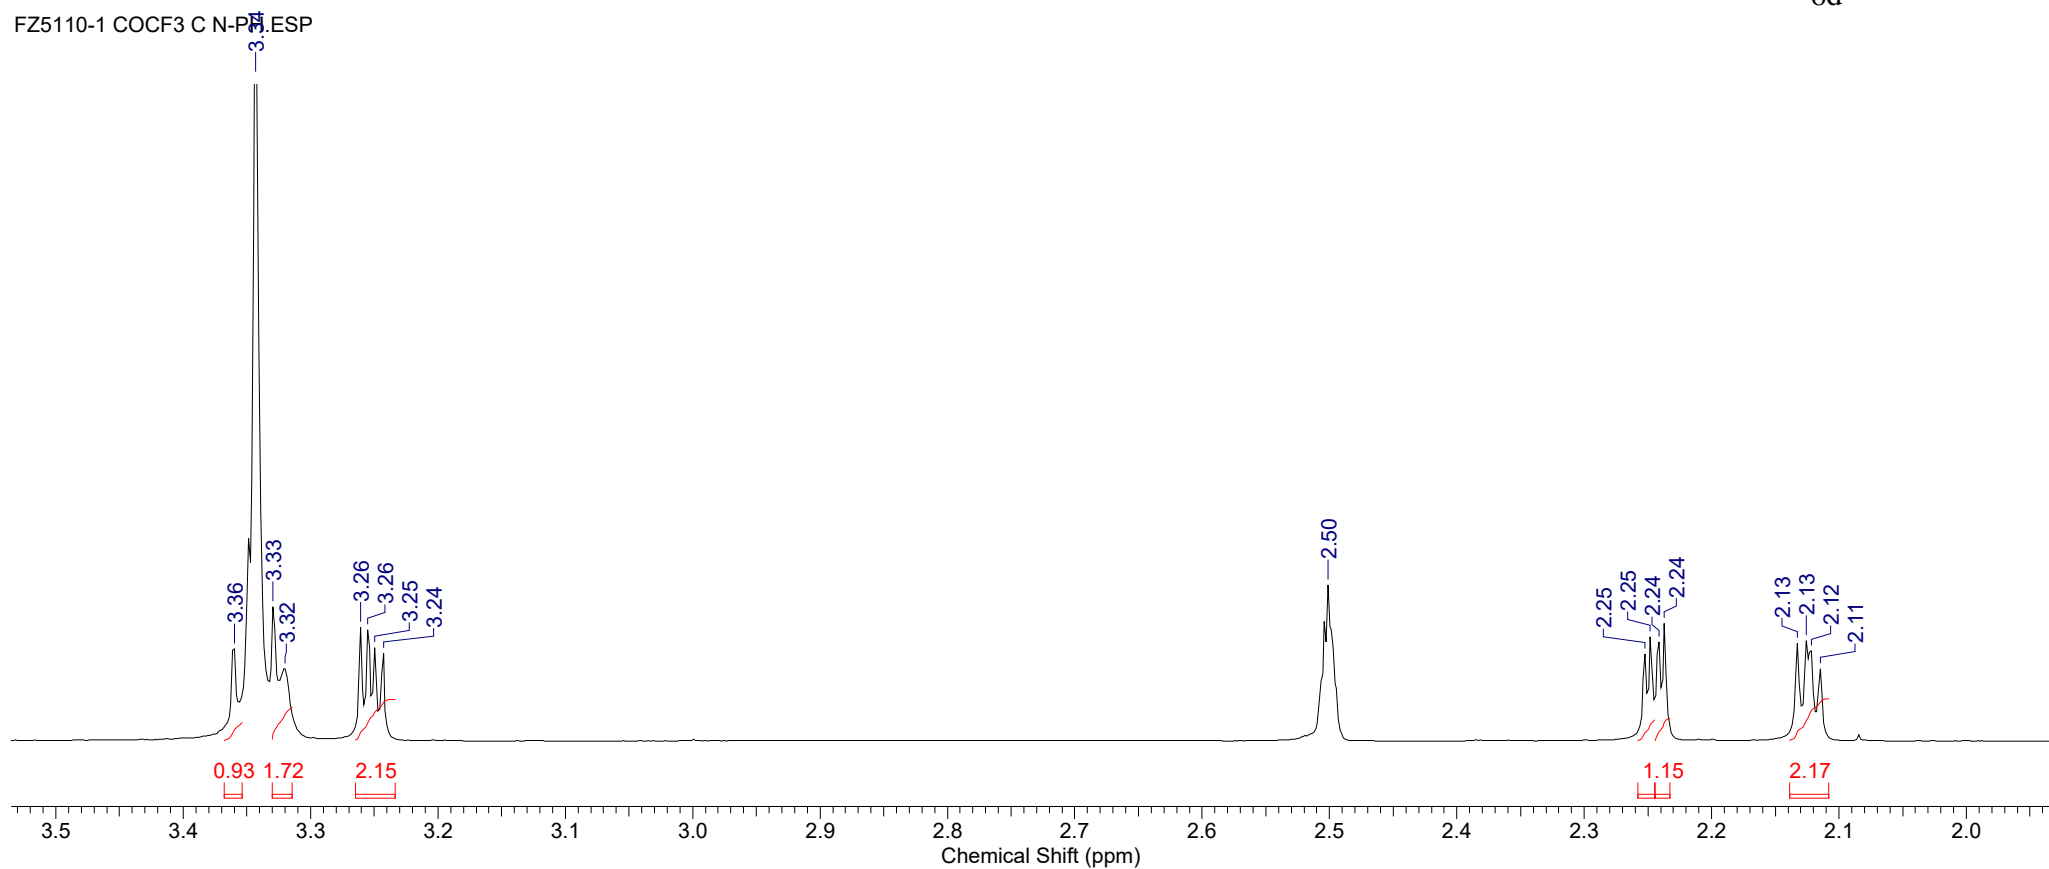

|                                                                                             |                    |
|---------------------------------------------------------------------------------------------|--------------------|
| <b>Formula</b> C <sub>22</sub> H <sub>17</sub> F <sub>3</sub> N <sub>2</sub> O <sub>5</sub> | <b>FW</b> 446.3760 |
|---------------------------------------------------------------------------------------------|--------------------|

|                                        |                                                           |                                    |
|----------------------------------------|-----------------------------------------------------------|------------------------------------|
| <b>Acquisition Time (sec)</b> 0.6921   | <b>Comment</b> single pulse decoupled gated NOE           | <b>Date</b> 25 Aug 2020 11:04:52   |
| <b>Date Stamp</b> 25 Aug 2020 11:06:08 | <b>File Name</b> C:\USERS\lpa6a534\DOWNLOADS\FZ9049-3.JDF | <b>Frequency (MHz)</b> 150.91      |
| <b>Nucleus</b> 13C                     | <b>Number of Transients</b> 2038                          | <b>Origin</b> ECA 600              |
| <b>Points Count</b> 32768              | <b>Pulse Sequence</b> single pulse dec                    | <b>Original Points Count</b> 32768 |
| <b>Spectrum Offset (Hz)</b> 15091.3428 | <b>Sweep Width (Hz)</b> 47348.49                          | <b>Receiver Gain</b> 58.00         |
|                                        |                                                           | <b>Solvent</b> DMSO-d6             |

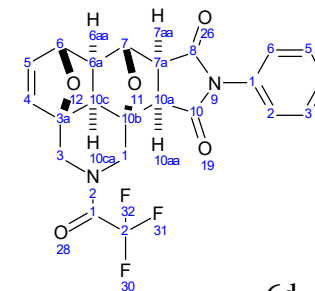

6d

6D - 13C FZ9049-3.ESP

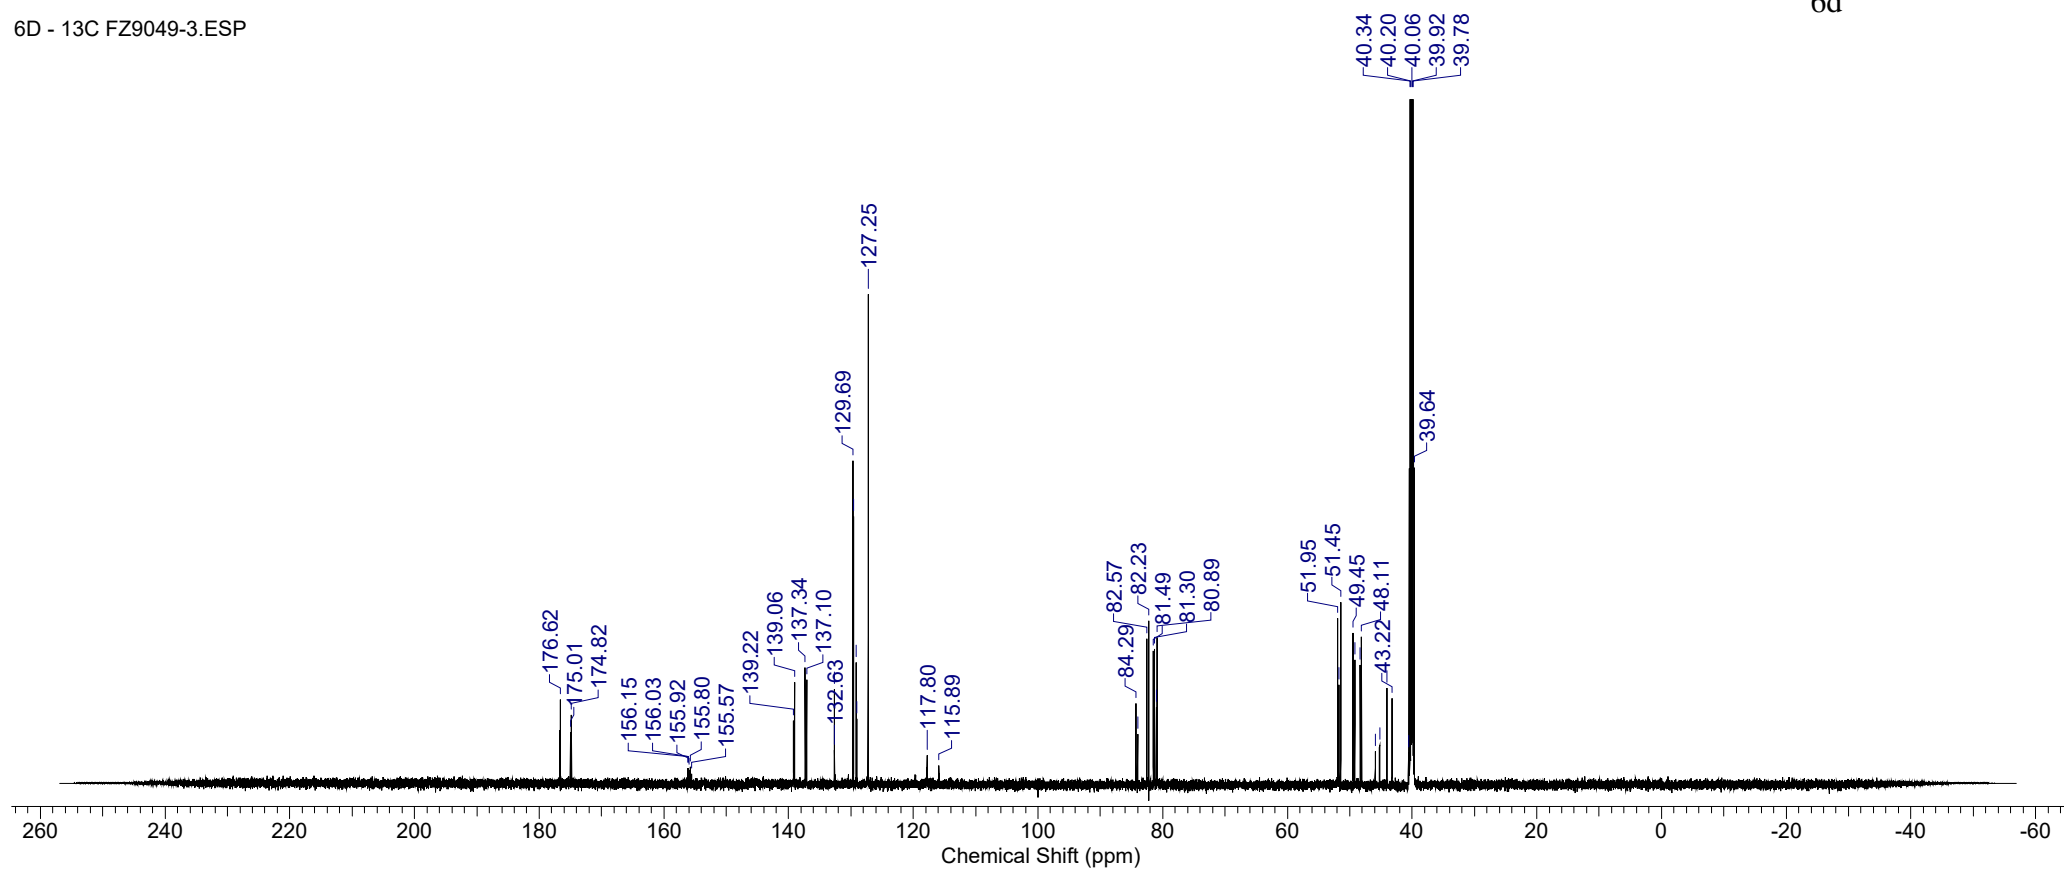

|                                                                                             |                    |
|---------------------------------------------------------------------------------------------|--------------------|
| <b>Formula</b> C <sub>22</sub> H <sub>17</sub> F <sub>3</sub> N <sub>2</sub> O <sub>5</sub> | <b>FW</b> 446.3760 |
|---------------------------------------------------------------------------------------------|--------------------|

|                                        |                                                           |                                    |
|----------------------------------------|-----------------------------------------------------------|------------------------------------|
| <b>Acquisition Time (sec)</b> 0.6921   | <b>Comment</b> single pulse decoupled gated NOE           | <b>Date</b> 25 Aug 2020 11:04:52   |
| <b>Date Stamp</b> 25 Aug 2020 11:06:08 | <b>File Name</b> C:\USERS\lpa6a534\DOWNLOADS\FZ9049-3.JDF | <b>Frequency (MHz)</b> 150.91      |
| <b>Nucleus</b> 13C                     | <b>Number of Transients</b> 2038                          | <b>Origin</b> ECA 600              |
| <b>Points Count</b> 32768              | <b>Pulse Sequence</b> single pulse dec                    | <b>Original Points Count</b> 32768 |
| <b>Spectrum Offset (Hz)</b> 15091.3428 | <b>Sweep Width (Hz)</b> 47348.49                          | <b>Receiver Gain</b> 58.00         |
|                                        |                                                           | <b>Solvent</b> DMSO-d6             |

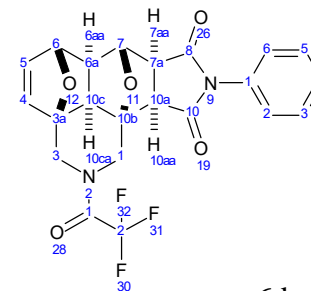

6d

6D - 13C FZ9049-3.ESP

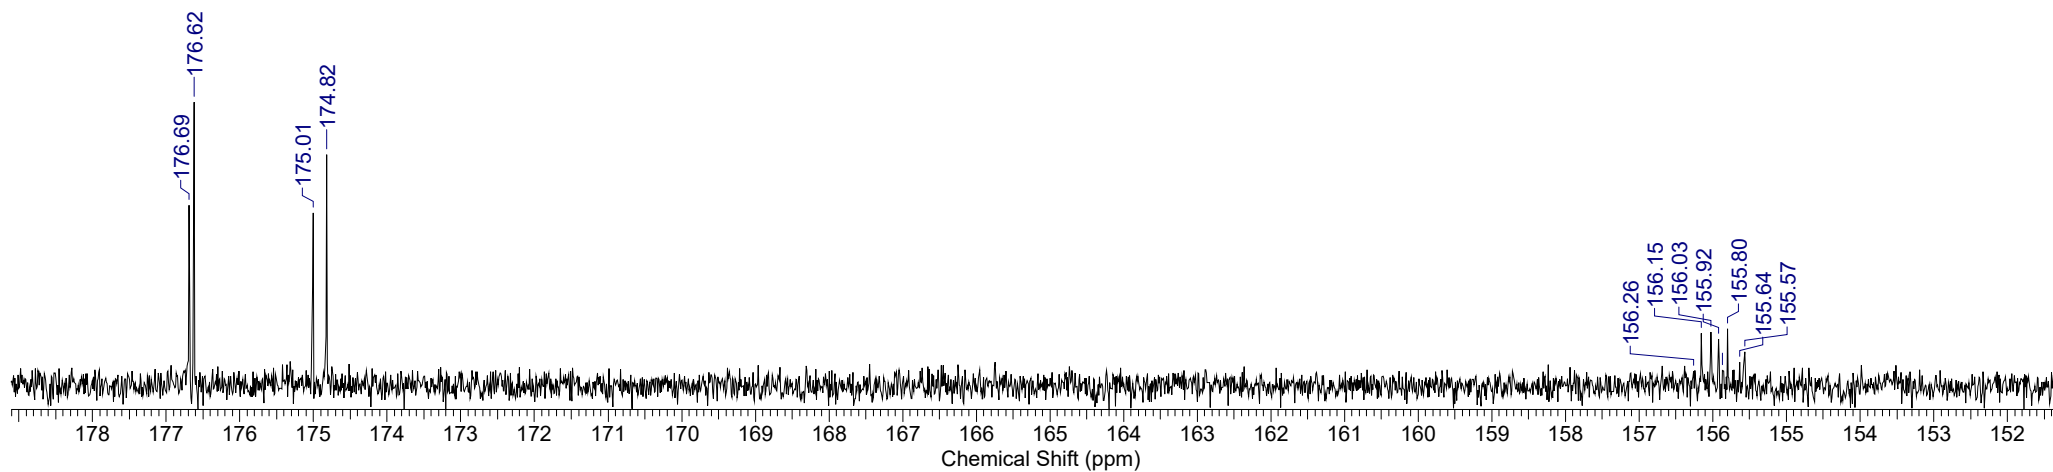

|                                                                                             |                    |
|---------------------------------------------------------------------------------------------|--------------------|
| <b>Formula</b> C <sub>22</sub> H <sub>17</sub> F <sub>3</sub> N <sub>2</sub> O <sub>5</sub> | <b>FW</b> 446.3760 |
|---------------------------------------------------------------------------------------------|--------------------|

|                                        |                                                          |                                    |
|----------------------------------------|----------------------------------------------------------|------------------------------------|
| <b>Acquisition Time (sec)</b> 0.6921   | <b>Comment</b> single pulse decoupled gated NOE          | <b>Date</b> 25 Aug 2020 11:04:52   |
| <b>Date Stamp</b> 25 Aug 2020 11:06:08 | <b>File Name</b> C:\USERS\Pa6a534\DOWNLOADS\FZ9049-3.JDF | <b>Frequency (MHz)</b> 150.91      |
| <b>Nucleus</b> 13C                     | <b>Number of Transients</b> 2038                         | <b>Origin</b> ECA 600              |
| <b>Points Count</b> 32768              | <b>Pulse Sequence</b> single pulse dec                   | <b>Original Points Count</b> 32768 |
| <b>Spectrum Offset (Hz)</b> 15091.3428 | <b>Sweep Width (Hz)</b> 47348.49                         | <b>Receiver Gain</b> 58.00         |
|                                        |                                                          | <b>Solvent</b> DMSO-d6             |

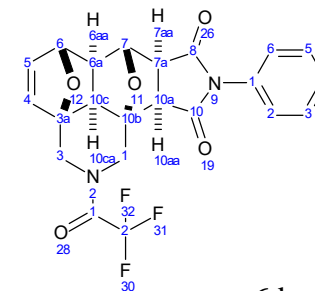

6d

6D - 13C FZ9049-3.ESP

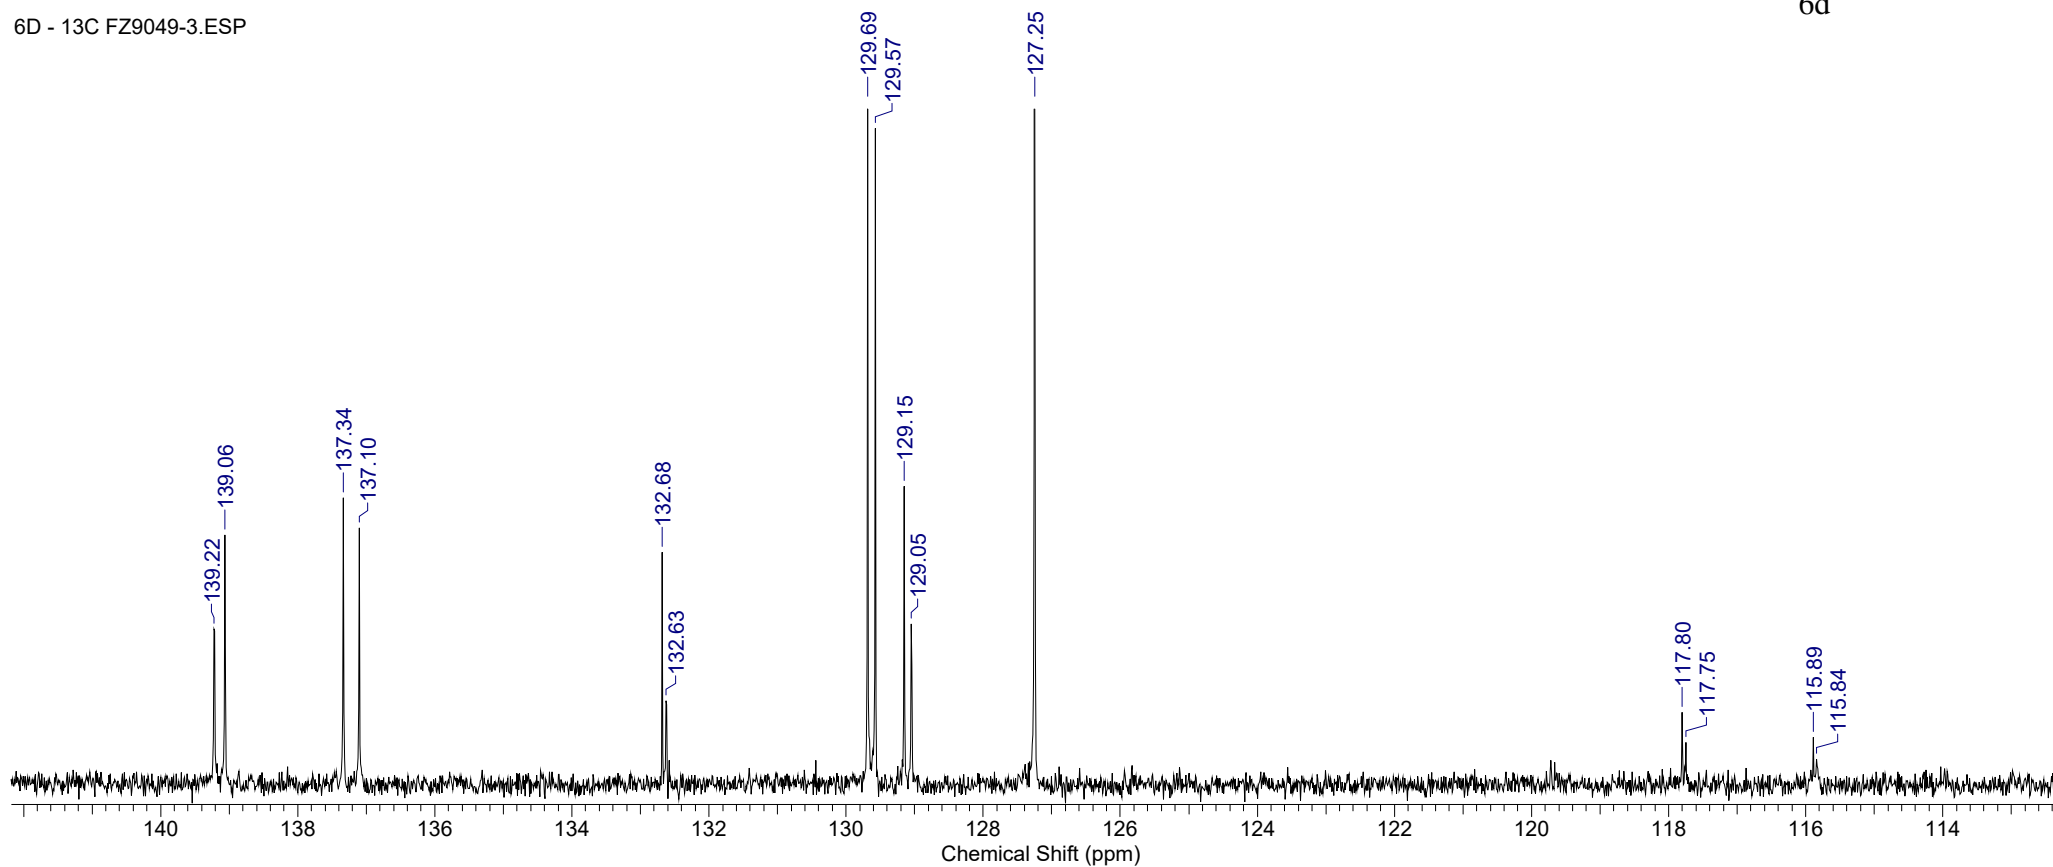

|                                                                                             |                    |
|---------------------------------------------------------------------------------------------|--------------------|
| <b>Formula</b> C <sub>22</sub> H <sub>17</sub> F <sub>3</sub> N <sub>3</sub> O <sub>5</sub> | <b>FW</b> 446.3760 |
|---------------------------------------------------------------------------------------------|--------------------|

|                                        |                                                           |                                    |
|----------------------------------------|-----------------------------------------------------------|------------------------------------|
| <b>Acquisition Time (sec)</b> 0.6921   | <b>Comment</b> single pulse decoupled gated NOE           | <b>Date</b> 25 Aug 2020 11:04:52   |
| <b>Date Stamp</b> 25 Aug 2020 11:06:08 | <b>File Name</b> C:\USERS\lta6a534\DOWNLOADS\FZ9049-3.JDF | <b>Frequency (MHz)</b> 150.91      |
| <b>Nucleus</b> 13C                     | <b>Number of Transients</b> 2038                          | <b>Origin</b> ECA 600              |
| <b>Points Count</b> 32768              | <b>Pulse Sequence</b> single pulse dec                    | <b>Original Points Count</b> 32768 |
| <b>Spectrum Offset (Hz)</b> 15091.3428 | <b>Sweep Width (Hz)</b> 47348.49                          | <b>Receiver Gain</b> 58.00         |
|                                        |                                                           | <b>Solvent</b> DMSO-d6             |

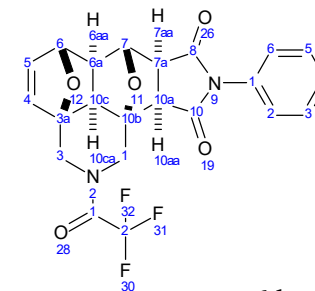

6d

6D - 13C FZ9049-3.ESP

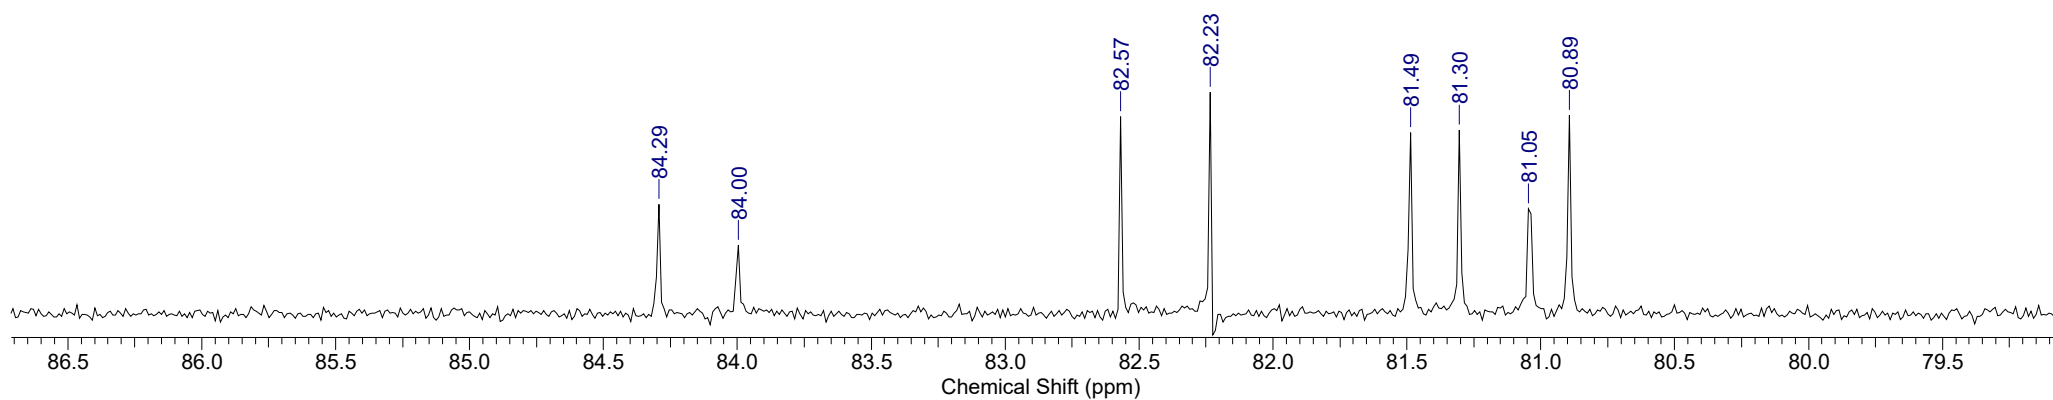

|                                                                                             |                    |
|---------------------------------------------------------------------------------------------|--------------------|
| <b>Formula</b> C <sub>22</sub> H <sub>17</sub> F <sub>3</sub> N <sub>3</sub> O <sub>5</sub> | <b>FW</b> 446.3760 |
|---------------------------------------------------------------------------------------------|--------------------|

|                                        |                                                           |                                    |
|----------------------------------------|-----------------------------------------------------------|------------------------------------|
| <b>Acquisition Time (sec)</b> 0.6921   | <b>Comment</b> single pulse decoupled gated NOE           | <b>Date</b> 25 Aug 2020 11:04:52   |
| <b>Date Stamp</b> 25 Aug 2020 11:06:08 | <b>File Name</b> C:\USERS\lta6a534\DOWNLOADS\FZ9049-3.JDF | <b>Frequency (MHz)</b> 150.91      |
| <b>Nucleus</b> 13C                     | <b>Number of Transients</b> 2038                          | <b>Origin</b> ECA 600              |
| <b>Points Count</b> 32768              | <b>Pulse Sequence</b> single pulse dec                    | <b>Original Points Count</b> 32768 |
| <b>Spectrum Offset (Hz)</b> 15091.3428 | <b>Sweep Width (Hz)</b> 47348.49                          | <b>Receiver Gain</b> 58.00         |
|                                        |                                                           | <b>Solvent</b> DMSO-d6             |

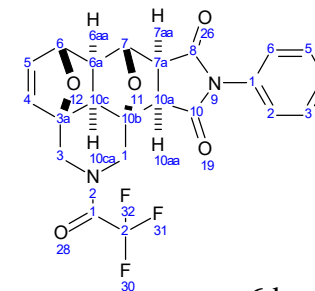

6d

6D - 13C FZ9049-3.ESP

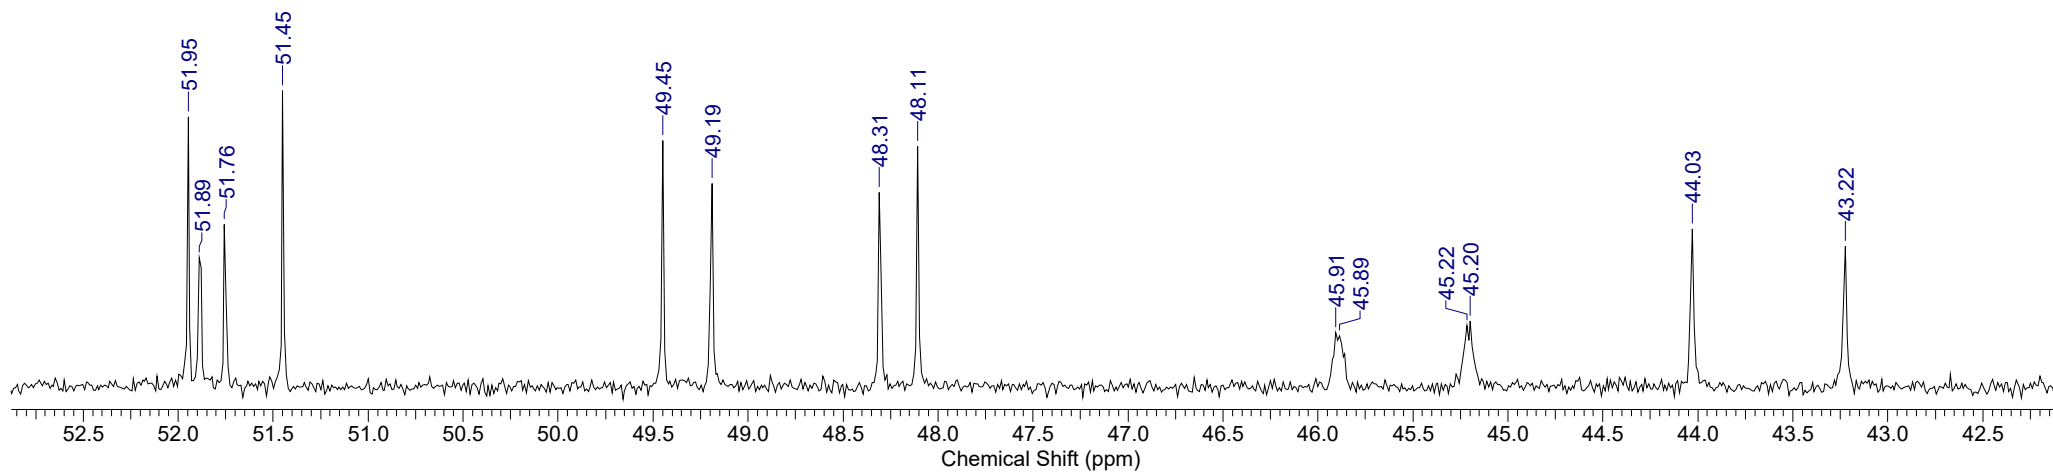



|                                                                                             |                    |
|---------------------------------------------------------------------------------------------|--------------------|
| <b>Formula</b> C <sub>22</sub> H <sub>17</sub> F <sub>3</sub> N <sub>2</sub> O <sub>5</sub> | <b>FW</b> 446.3760 |
|---------------------------------------------------------------------------------------------|--------------------|

|                                                          |                                    |                                         |                                        |
|----------------------------------------------------------|------------------------------------|-----------------------------------------|----------------------------------------|
| <b>Acquisition Time (sec)</b> 0.4614                     | <b>Comment</b> single_pulse        | <b>Date</b> 25 Aug 2020 10:28:48        | <b>Date Stamp</b> 25 Aug 2020 10:30:03 |
| <b>File Name</b> C:\USERS\Лабa534\DOWNLOADS\FZ9049-1.JDF | <b>Frequency (MHz)</b> 564.73      | <b>Nucleus</b> 19F                      | <b>Number of Transients</b> 8          |
| <b>Origin</b> ECA 600                                    | <b>Original Points Count</b> 65536 | <b>Owner</b> CKP                        | <b>Points Count</b> 65536              |
| <b>Receiver Gain</b> 44.00                               | <b>Solvent</b> DMSO-d6             | <b>Spectrum Offset (Hz)</b> -56472.6094 | <b>Sweep Width (Hz)</b> 142045.45      |
|                                                          |                                    |                                         | <b>Pulse Sequence</b> single_pulse.ex2 |

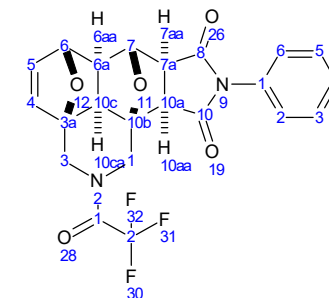

6d

FZ9049-1.JDF

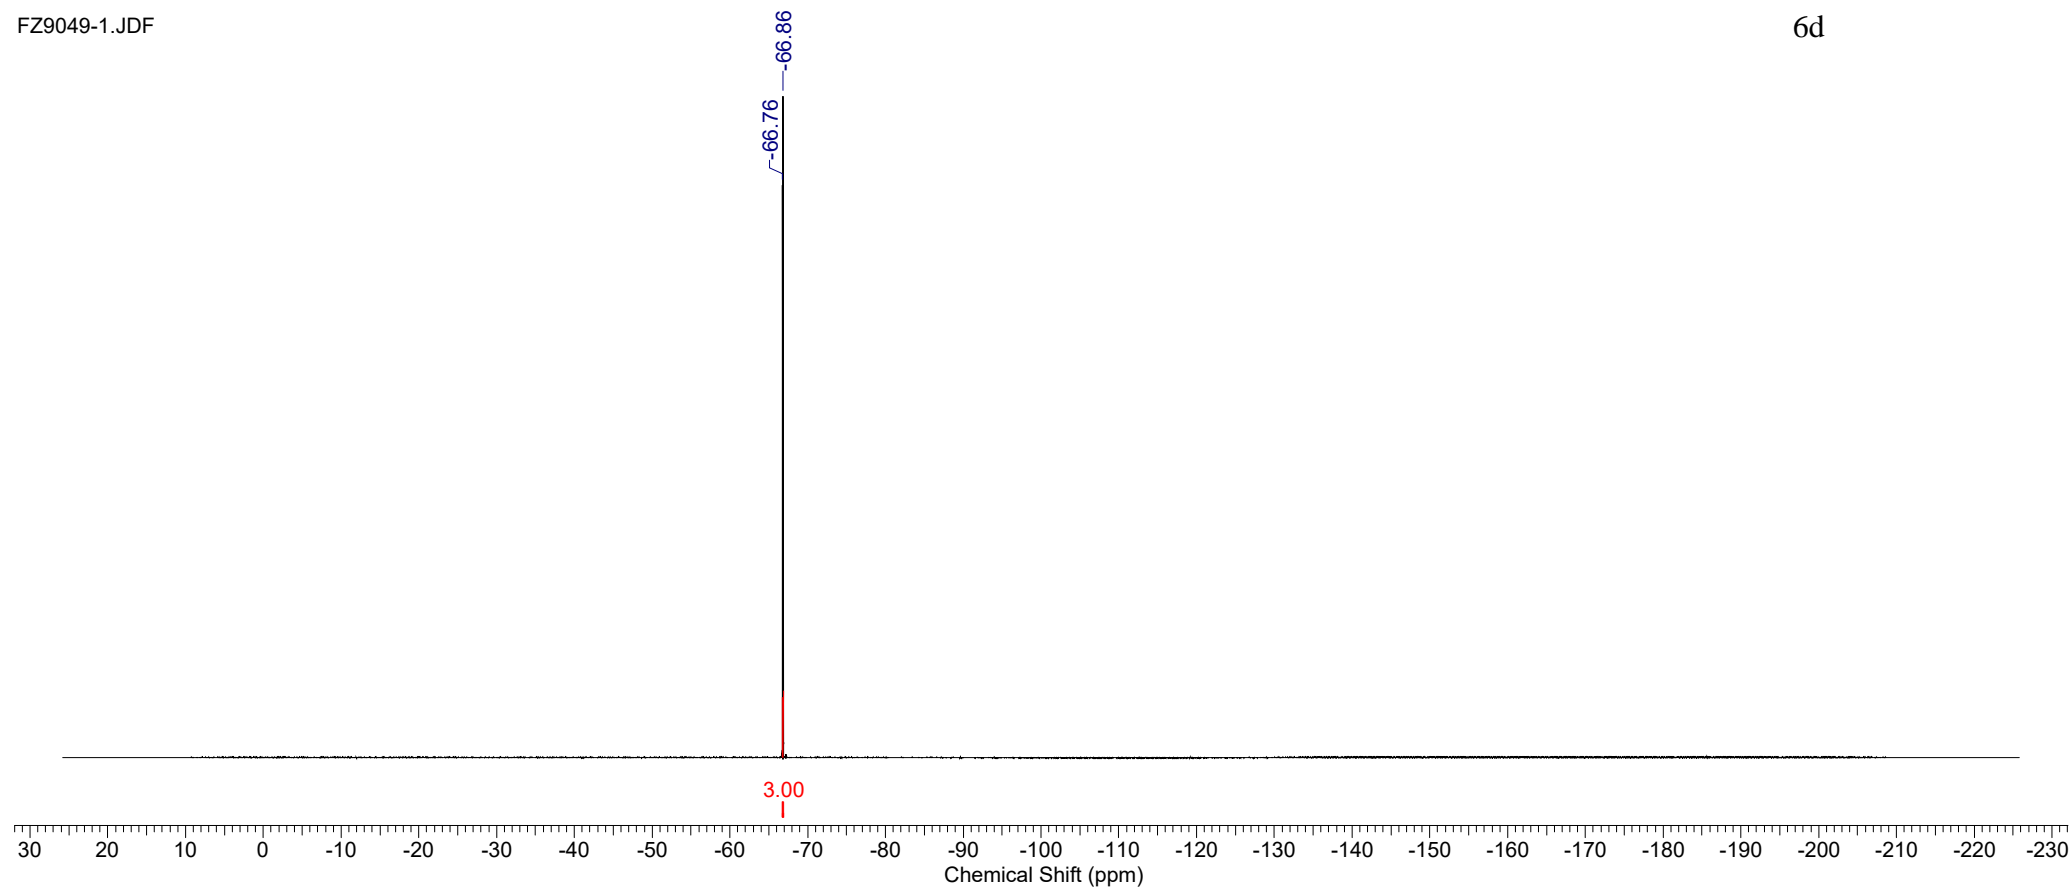

|                                                                                             |                    |
|---------------------------------------------------------------------------------------------|--------------------|
| <b>Formula</b> C <sub>22</sub> H <sub>17</sub> F <sub>3</sub> N <sub>2</sub> O <sub>5</sub> | <b>FW</b> 446.3760 |
|---------------------------------------------------------------------------------------------|--------------------|

|                                                          |                                    |                                         |                                        |
|----------------------------------------------------------|------------------------------------|-----------------------------------------|----------------------------------------|
| <b>Acquisition Time (sec)</b> 0.4614                     | <b>Comment</b> single_pulse        | <b>Date</b> 25 Aug 2020 10:28:48        | <b>Date Stamp</b> 25 Aug 2020 10:30:03 |
| <b>File Name</b> C:\USERS\Лабa534\DOWNLOADS\FZ9049-1.JDF | <b>Frequency (MHz)</b> 564.73      | <b>Nucleus</b> 19F                      | <b>Number of Transients</b> 8          |
| <b>Origin</b> ECA 600                                    | <b>Original Points Count</b> 65536 | <b>Owner</b> CKP                        | <b>Points Count</b> 65536              |
| <b>Receiver Gain</b> 44.00                               | <b>Solvent</b> DMSO-d6             | <b>Spectrum Offset (Hz)</b> -56472.6094 | <b>Sweep Width (Hz)</b> 142045.45      |
|                                                          |                                    |                                         | <b>Pulse Sequence</b> single_pulse.ex2 |



6d

FZ9049-1.JDF

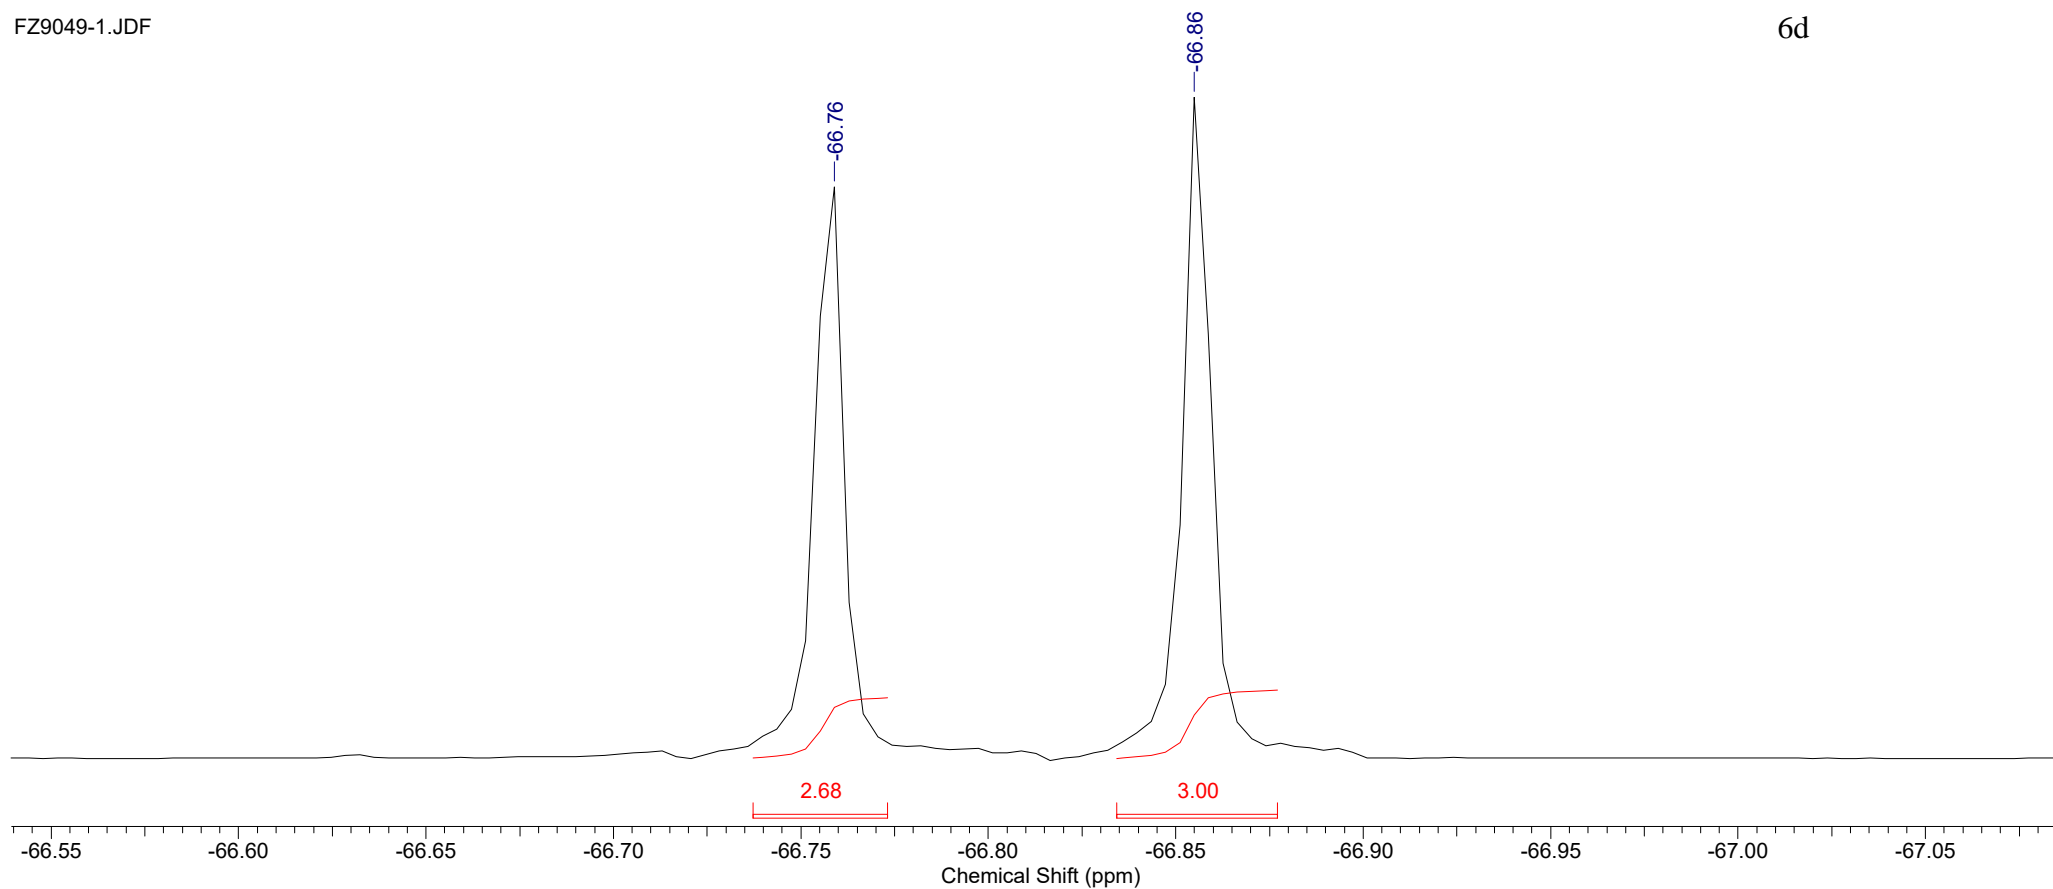

|                                                                                              |                    |
|----------------------------------------------------------------------------------------------|--------------------|
| <b>Formula</b> C <sub>22</sub> H <sub>17</sub> Cl <sub>3</sub> N <sub>2</sub> O <sub>5</sub> | <b>FW</b> 495.7398 |
|----------------------------------------------------------------------------------------------|--------------------|

|                                        |                                                            |                                      |                               |
|----------------------------------------|------------------------------------------------------------|--------------------------------------|-------------------------------|
| <b>Acquisition Time (sec)</b> 1.9818   | <b>Comment</b> single pulse                                | <b>Date</b> 12 Aug 1990 07:12:25     | <b>Frequency (MHz)</b> 600.17 |
| <b>Date Stamp</b> 22 Oct 2019 13:15:34 | <b>File Name</b> C:\USERS\I\Ia6a534\DOWNLOADS\FZ8021-1.JDF | <b>Original Points Count</b> 32768   | <b>Owner</b> delta            |
| <b>Nucleus</b> 1H                      | <b>Number of Transients</b> 8                              | <b>Origin</b> ECA 600                | <b>Receiver Gain</b> 50.00    |
| <b>Points Count</b> 32768              | <b>Pulse Sequence</b> single_pulse.ex2                     | <b>Temperature (degree C)</b> 23.600 | <b>Solvent</b> CHLOROFORM-d   |
| <b>Spectrum Offset (Hz)</b> 5409.1133  | <b>Sweep Width (Hz)</b> 16534.39                           |                                      |                               |

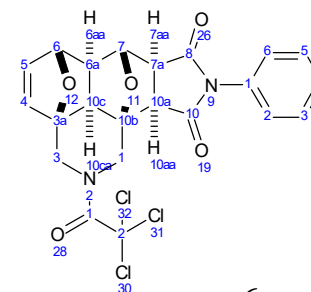

6e

FZ8021-1.ESP

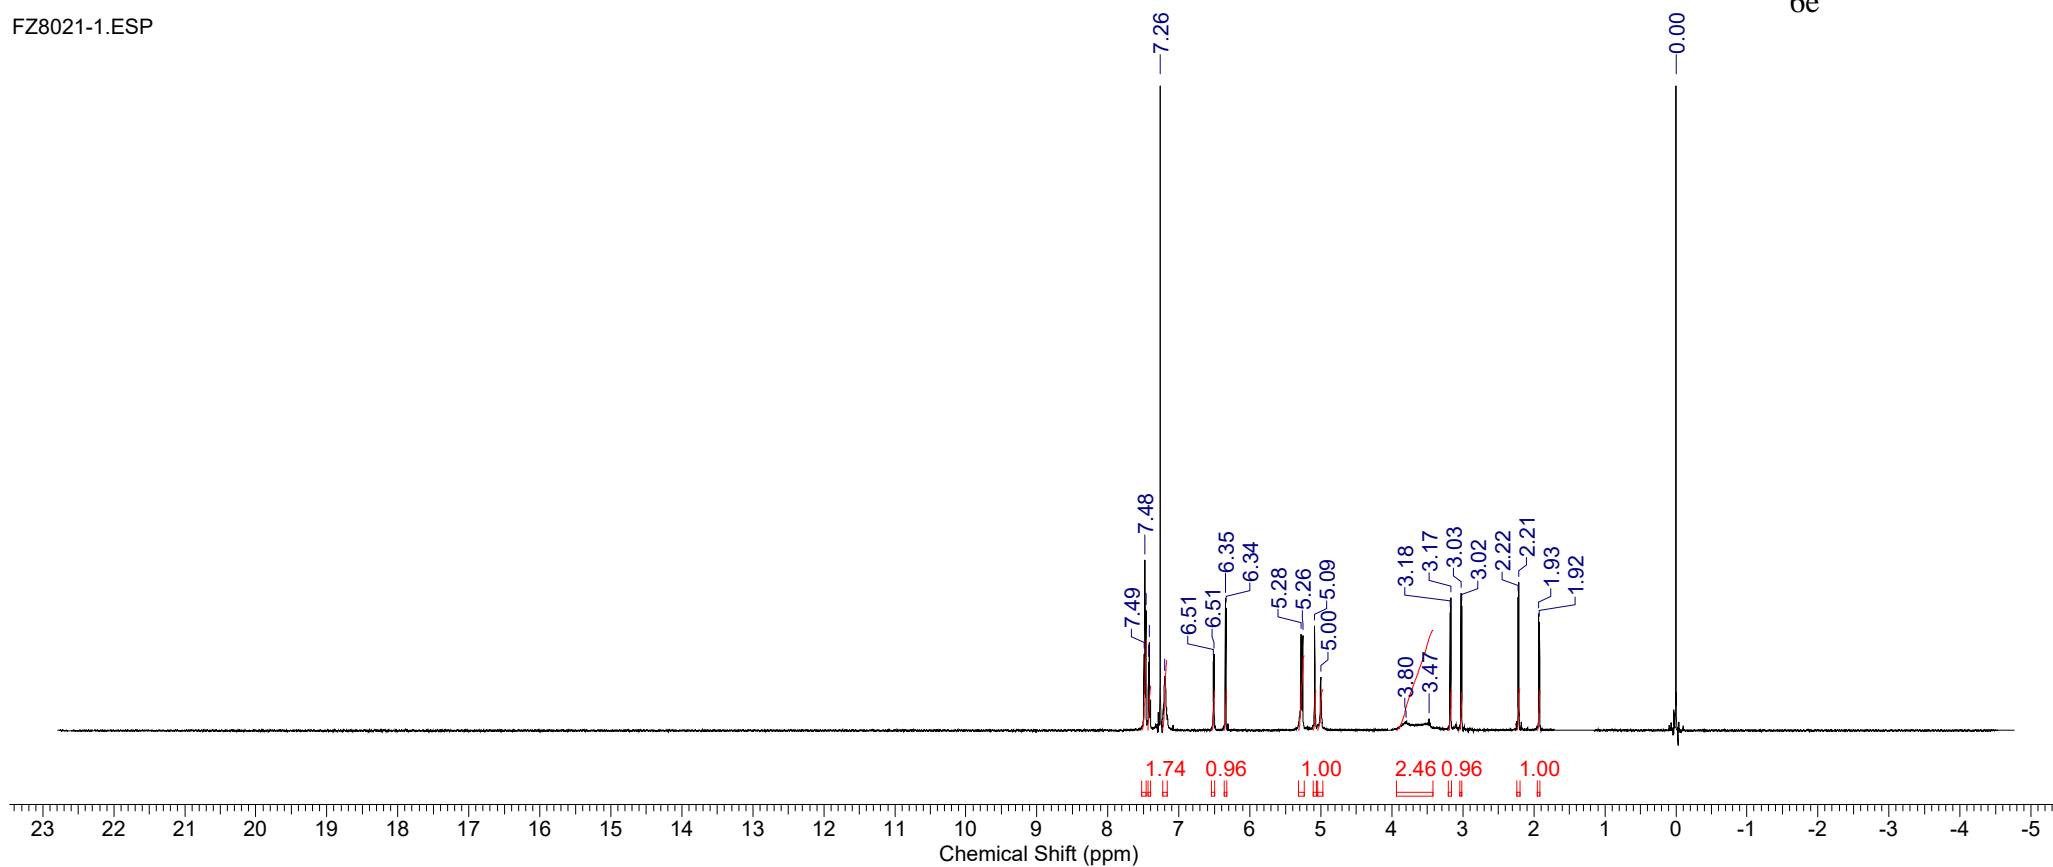

Formula C<sub>22</sub>H<sub>17</sub>Cl<sub>3</sub>N<sub>3</sub>O<sub>5</sub> FW 495.7398

|                        |                      |                      |                                         |                        |                      |                       |              |
|------------------------|----------------------|----------------------|-----------------------------------------|------------------------|----------------------|-----------------------|--------------|
| Acquisition Time (sec) | 1.9818               | Comment              | single pulse                            | Date                   | 12 Aug 1990 07:12:25 | Frequency (MHz)       | 600.17       |
| Date Stamp             | 22 Oct 2019 13:15:34 | File Name            | C:\USERS\Лабa534\DOWNLOADS\FZ8021-1.JDF |                        |                      | Owner                 | delta        |
| Nucleus                | 1H                   | Number of Transients | 8                                       | Origin                 | ECA 600              | Original Points Count | 32768        |
| Points Count           | 32768                | Pulse Sequence       | single_pulse.ex2                        | Receiver Gain          | 50.00                | Solvent               | CHLOROFORM-d |
| Spectrum Offset (Hz)   | 5409.1133            | Sweep Width (Hz)     | 16534.39                                | Temperature (degree C) | 23.600               |                       |              |

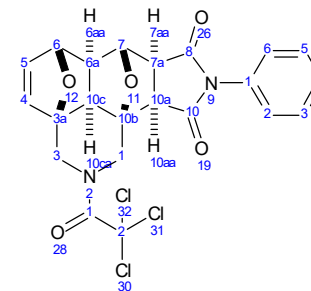

FZ8021-1.ESP

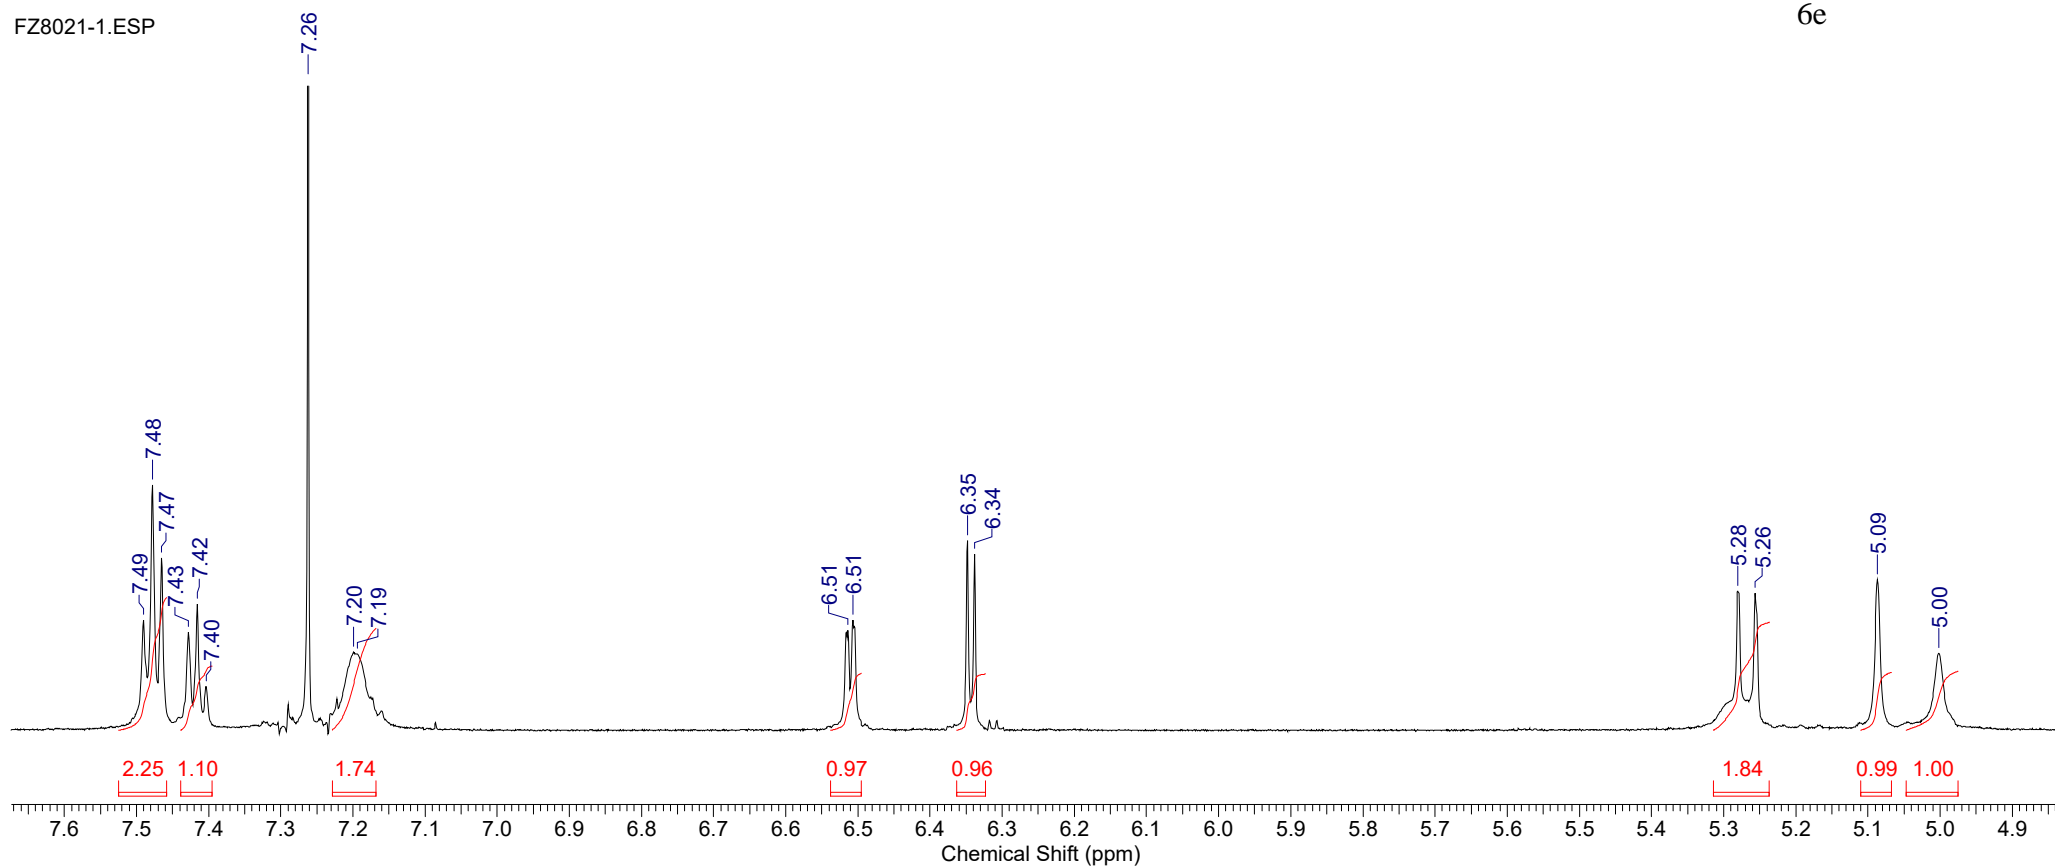

**Formula** C<sub>22</sub>H<sub>17</sub>Cl<sub>3</sub>N<sub>3</sub>O<sub>5</sub> **FW** 495.7398

|                               |                      |                             |                                         |                               |                      |                              |              |
|-------------------------------|----------------------|-----------------------------|-----------------------------------------|-------------------------------|----------------------|------------------------------|--------------|
| <b>Acquisition Time (sec)</b> | 1.9818               | <b>Comment</b>              | single pulse                            | <b>Date</b>                   | 12 Aug 1990 07:12:25 | <b>Frequency (MHz)</b>       | 600.17       |
| <b>Date Stamp</b>             | 22 Oct 2019 13:15:34 | <b>File Name</b>            | C:\USERS\Лабa534\DOWNLOADS\FZ8021-1.JDF |                               |                      | <b>Owner</b>                 | delta        |
| <b>Nucleus</b>                | 1H                   | <b>Number of Transients</b> | 8                                       | <b>Origin</b>                 | ECA 600              | <b>Original Points Count</b> | 32768        |
| <b>Points Count</b>           | 32768                | <b>Pulse Sequence</b>       | single_pulse.ex2                        | <b>Receiver Gain</b>          | 50.00                | <b>Solvent</b>               | CHLOROFORM-d |
| <b>Spectrum Offset (Hz)</b>   | 5409.1133            | <b>Sweep Width (Hz)</b>     | 16534.39                                | <b>Temperature (degree C)</b> | 23.600               |                              |              |



6e

FZ8021-1.ESP

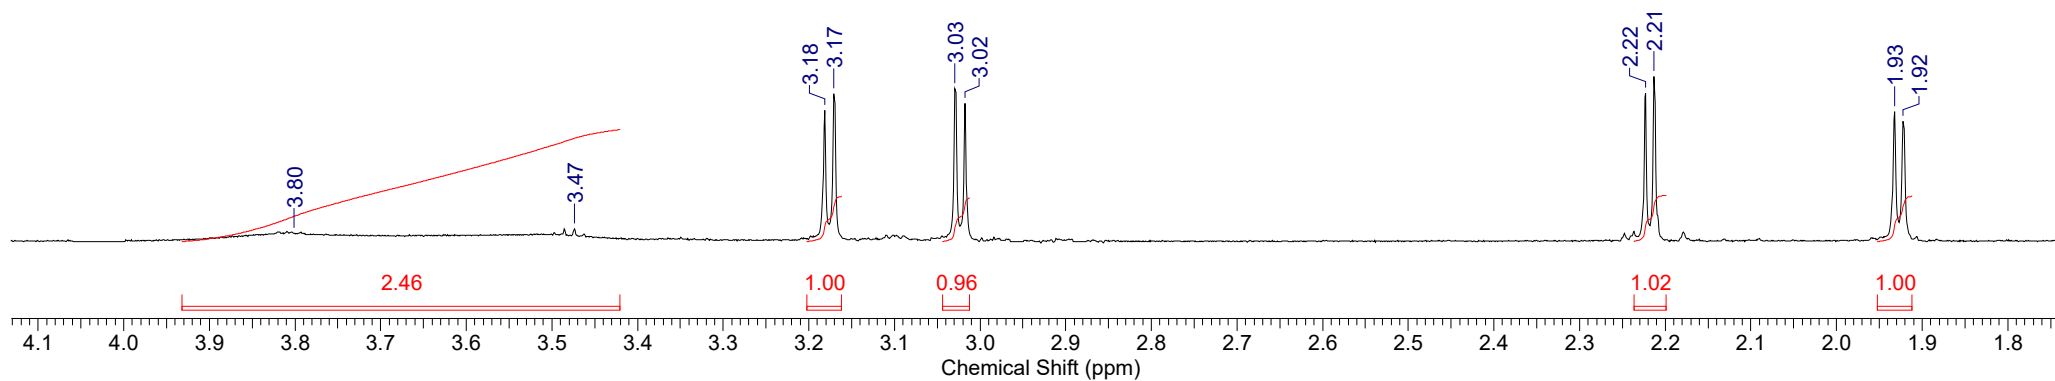

|                                                                                             |                    |
|---------------------------------------------------------------------------------------------|--------------------|
| <b>Formula</b> C <sub>22</sub> H <sub>17</sub> F <sub>3</sub> N <sub>2</sub> O <sub>5</sub> | <b>FW</b> 446.3760 |
|---------------------------------------------------------------------------------------------|--------------------|

|                                        |                                                           |                                    |
|----------------------------------------|-----------------------------------------------------------|------------------------------------|
| <b>Acquisition Time (sec)</b> 0.6921   | <b>Comment</b> single pulse decoupled gated NOE           | <b>Date</b> 25 Aug 2020 11:04:52   |
| <b>Date Stamp</b> 25 Aug 2020 11:06:08 | <b>File Name</b> C:\USERS\lta6a534\DOWNLOADS\FZ9049-3.JDF | <b>Frequency (MHz)</b> 150.91      |
| <b>Nucleus</b> 13C                     | <b>Number of Transients</b> 2038                          | <b>Origin</b> ECA 600              |
| <b>Points Count</b> 32768              | <b>Pulse Sequence</b> single pulse dec                    | <b>Original Points Count</b> 32768 |
| <b>Spectrum Offset (Hz)</b> 15091.3428 | <b>Sweep Width (Hz)</b> 47348.49                          | <b>Receiver Gain</b> 58.00         |
|                                        |                                                           | <b>Solvent</b> DMSO-d6             |

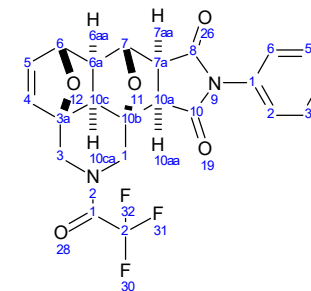

6D - 13C FZ9049-3.ESP

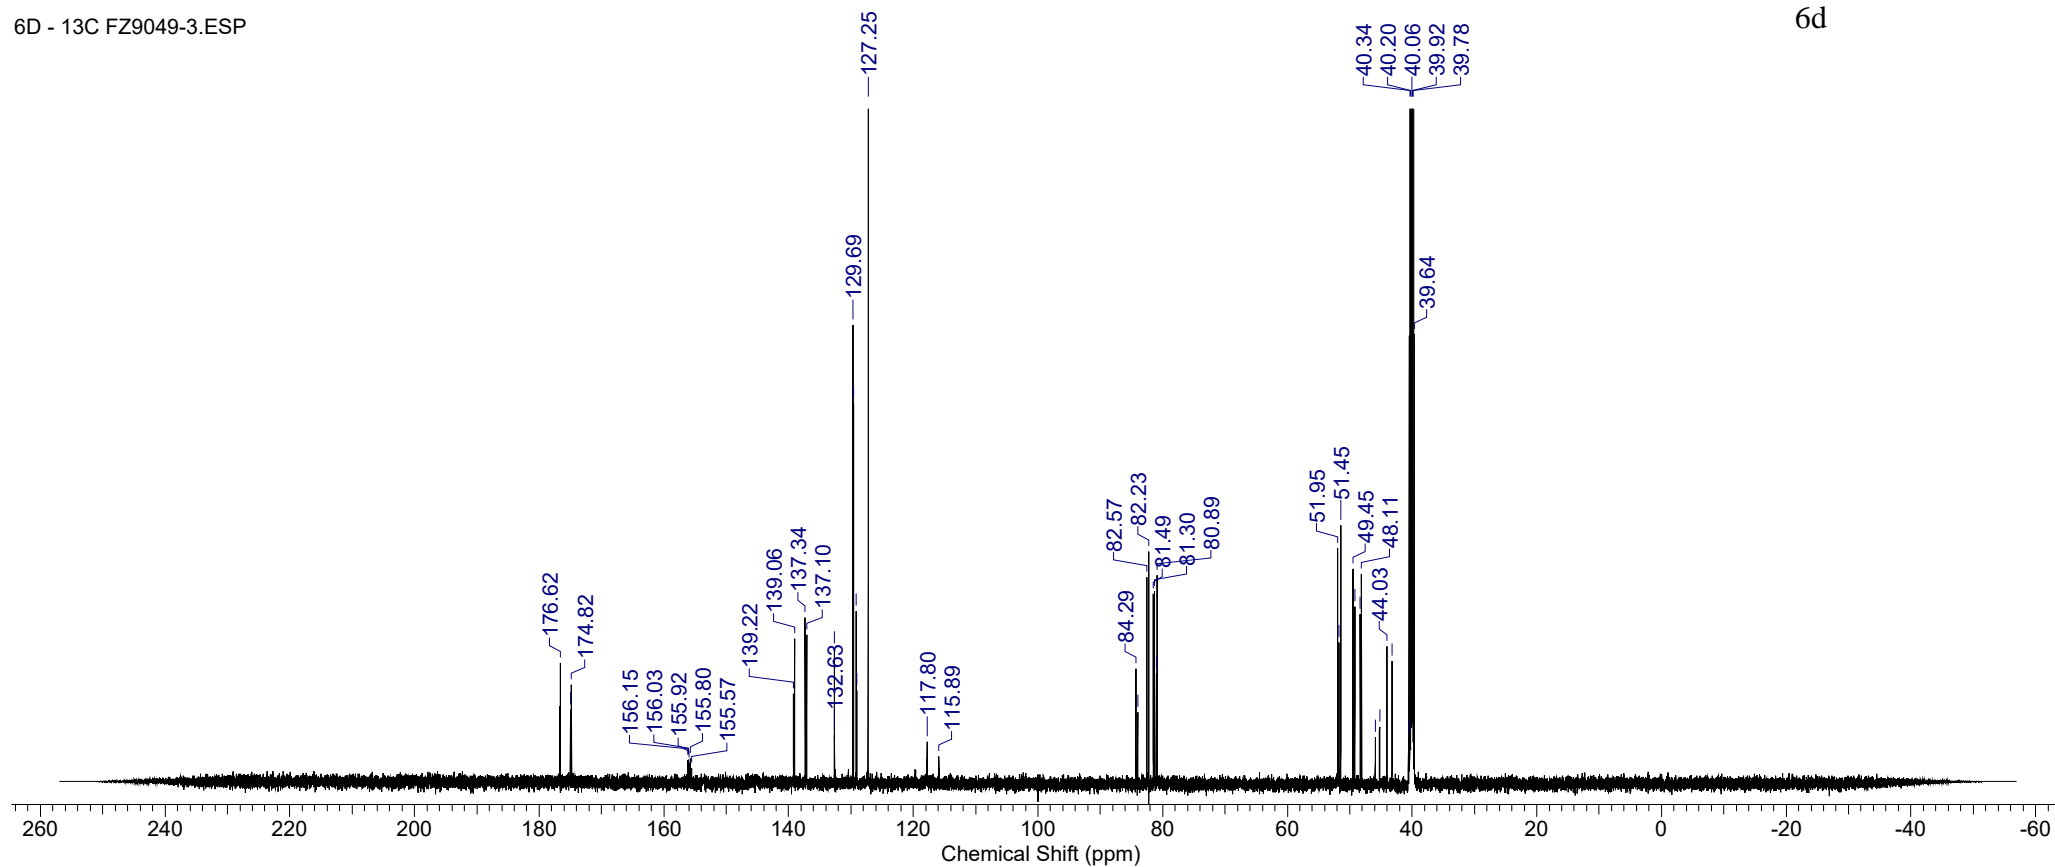

|                                                                                              |                    |
|----------------------------------------------------------------------------------------------|--------------------|
| <b>Formula</b> C <sub>22</sub> H <sub>17</sub> Cl <sub>3</sub> N <sub>2</sub> O <sub>5</sub> | <b>FW</b> 495.7398 |
|----------------------------------------------------------------------------------------------|--------------------|

|                                        |                                                          |                                        |
|----------------------------------------|----------------------------------------------------------|----------------------------------------|
| <b>Acquisition Time (sec)</b> 0.6921   | <b>Comment</b> single pulse decoupled gated NOE          | <b>Date</b> 25 Aug 2020 11:44:30       |
| <b>Date Stamp</b> 25 Aug 2020 11:45:45 | <b>File Name</b> C:\USERS\la6a534\DOWNLOADS\FZ9039-2.JDF |                                        |
| <b>Frequency (MHz)</b> 150.91          | <b>Nucleus</b> 13C                                       | <b>Number of Transients</b> 2084       |
| <b>Original Points Count</b> 32768     | <b>Owner</b> CKP                                         | <b>Points Count</b> 32768              |
| <b>Receiver Gain</b> 58.00             | <b>Solvent</b> CHLOROFORM-d                              | <b>Pulse Sequence</b> single pulse dec |
| <b>Sweep Width (Hz)</b> 47348.49       |                                                          | <b>Spectrum Offset (Hz)</b> 15091.3428 |

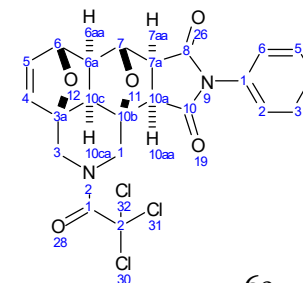

FZ9039-2.JDF

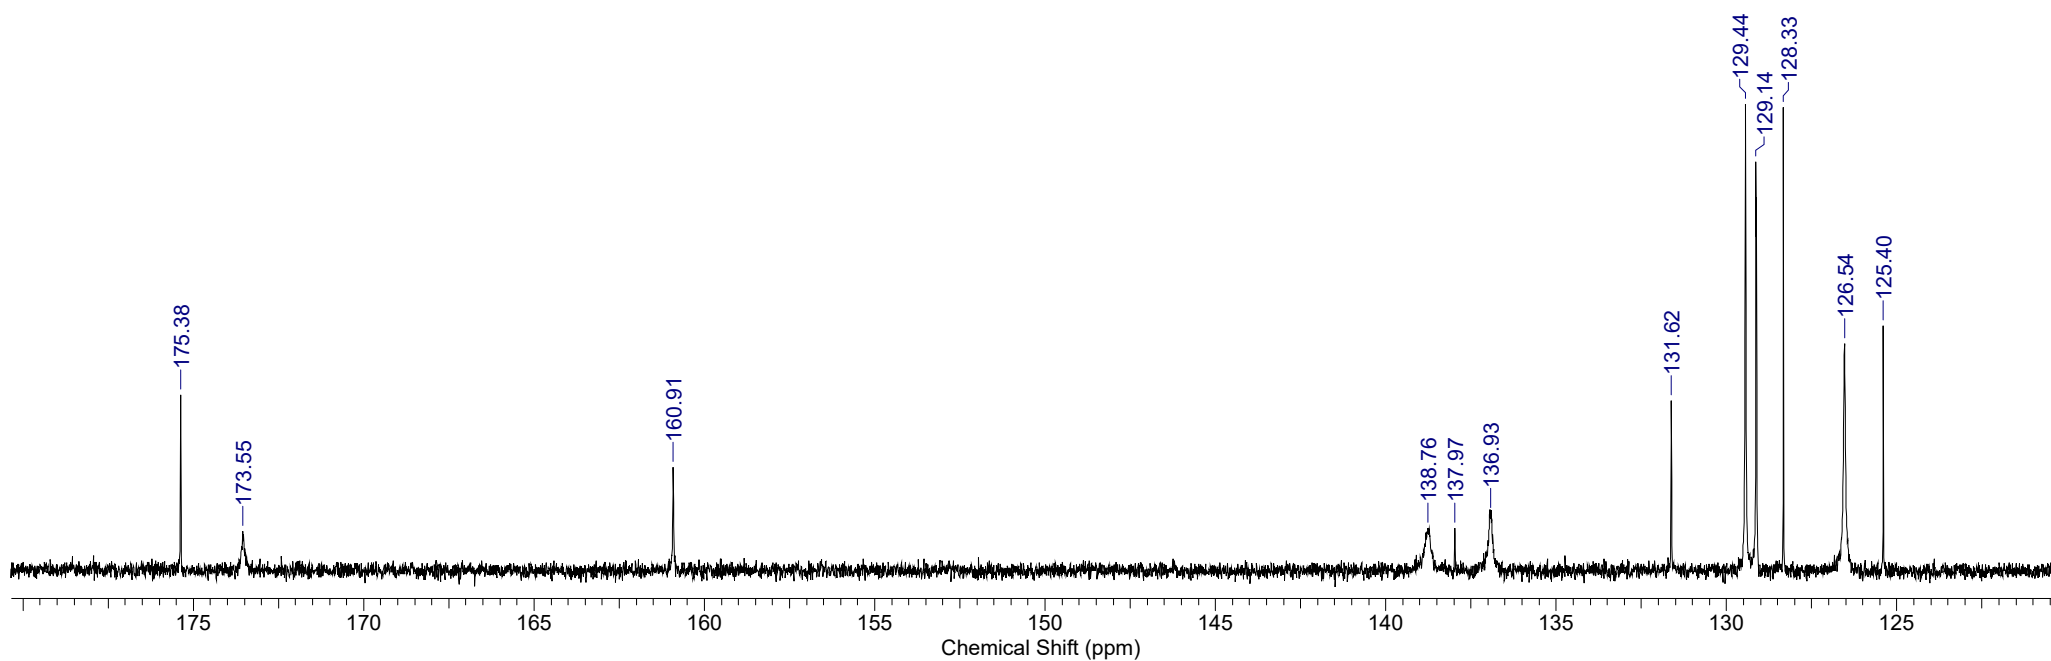

|                                                                                              |                    |
|----------------------------------------------------------------------------------------------|--------------------|
| <b>Formula</b> C <sub>22</sub> H <sub>17</sub> Cl <sub>3</sub> N <sub>2</sub> O <sub>5</sub> | <b>FW</b> 495.7398 |
|----------------------------------------------------------------------------------------------|--------------------|

|                                        |                                                          |                                        |
|----------------------------------------|----------------------------------------------------------|----------------------------------------|
| <b>Acquisition Time (sec)</b> 0.6921   | <b>Comment</b> single pulse decoupled gated NOE          | <b>Date</b> 25 Aug 2020 11:44:30       |
| <b>Date Stamp</b> 25 Aug 2020 11:45:45 | <b>File Name</b> C:\USERS\la6a534\DOWNLOADS\FZ9039-2.JDF |                                        |
| <b>Frequency (MHz)</b> 150.91          | <b>Nucleus</b> 13C                                       | <b>Number of Transients</b> 2084       |
| <b>Original Points Count</b> 32768     | <b>Owner</b> CKP                                         | <b>Points Count</b> 32768              |
| <b>Receiver Gain</b> 58.00             | <b>Solvent</b> CHLOROFORM-d                              | <b>Pulse Sequence</b> single pulse dec |
| <b>Sweep Width (Hz)</b> 47348.49       |                                                          | <b>Spectrum Offset (Hz)</b> 15091.3428 |

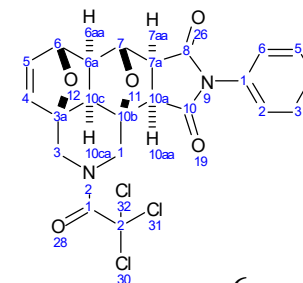

FZ9039-2.JDF

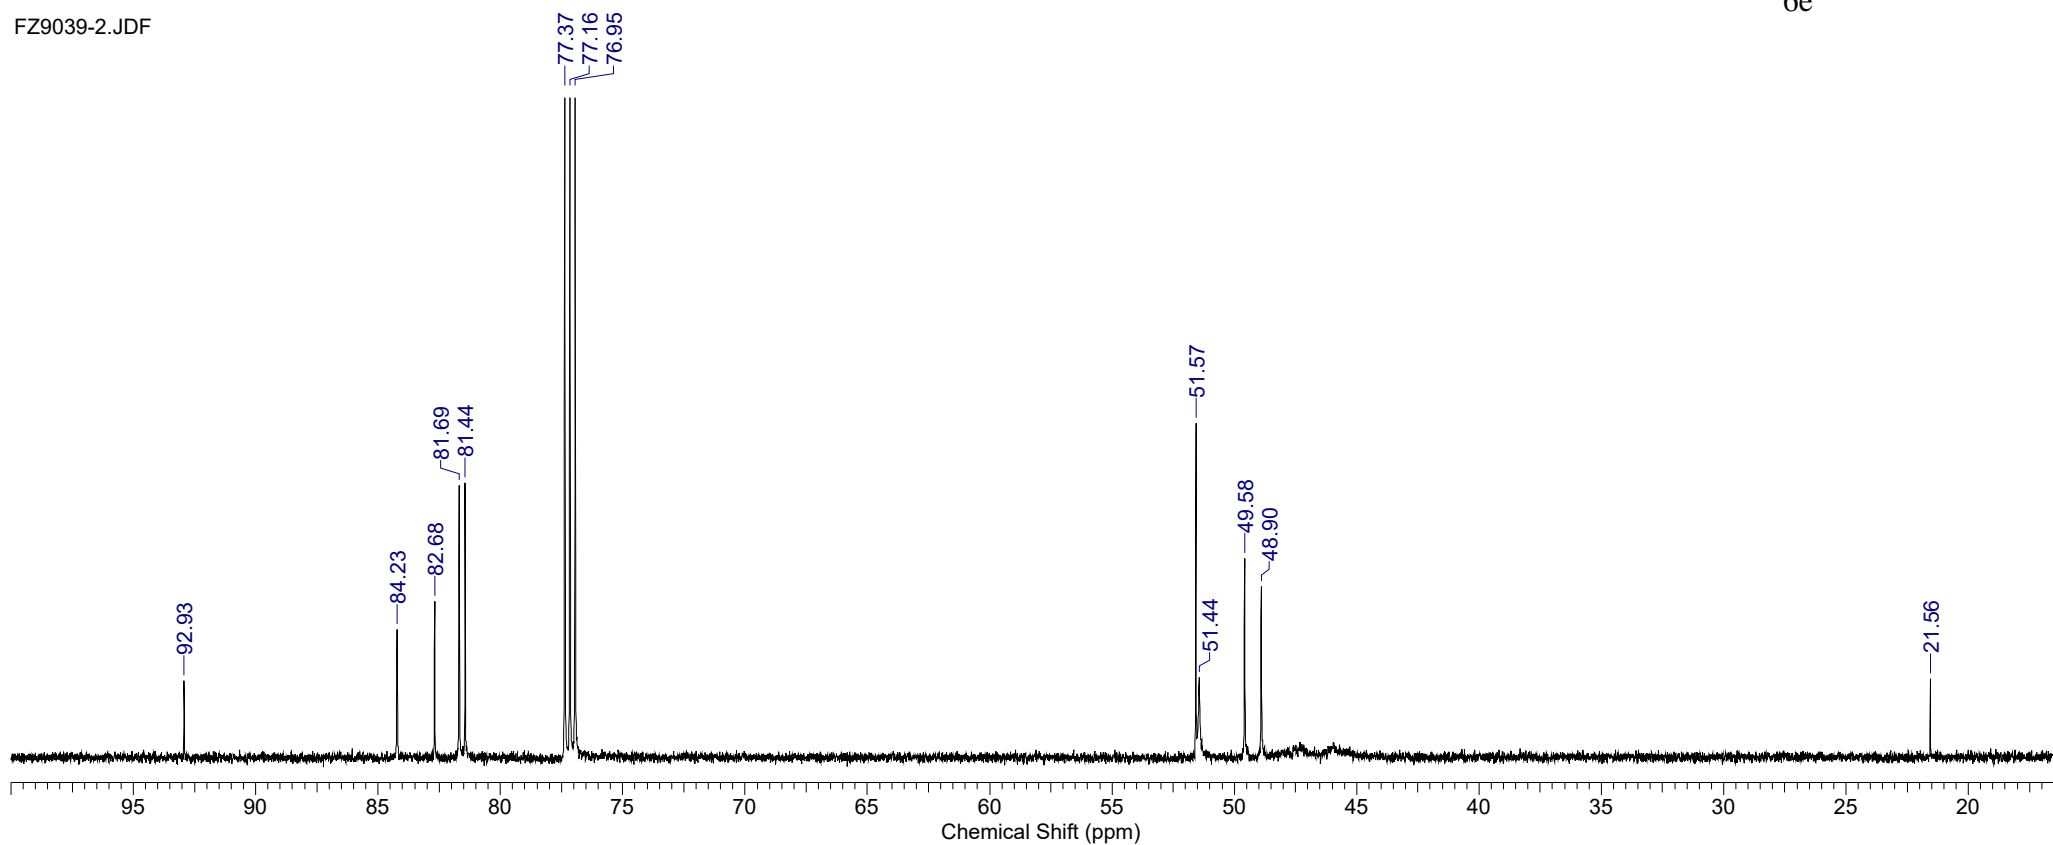



|                                                                              |                    |
|------------------------------------------------------------------------------|--------------------|
| <b>Formula</b> C <sub>27</sub> H <sub>22</sub> N <sub>2</sub> O <sub>5</sub> | <b>FW</b> 454.4740 |
|------------------------------------------------------------------------------|--------------------|

|                                                          |                                    |                                       |                                        |
|----------------------------------------------------------|------------------------------------|---------------------------------------|----------------------------------------|
| <b>Acquisition Time (sec)</b> 1.9818                     | <b>Comment</b> single_pulse        | <b>Date</b> 07 Aug 2020 11:09:45      | <b>Date Stamp</b> 07 Aug 2020 11:10:30 |
| <b>File Name</b> C:\USERS\Лабa534\DOWNLOADS\FZ8958-1.JDF | <b>Frequency (MHz)</b> 600.17      | <b>Nucleus</b> 1H                     | <b>Number of Transients</b> 8          |
| <b>Origin</b> ECA 600                                    | <b>Original Points Count</b> 32768 | <b>Owner</b> CKP                      | <b>Points Count</b> 32768              |
| <b>Receiver Gain</b> 28.00                               | <b>Solvent</b> DMSO-d6             | <b>Spectrum Offset (Hz)</b> 5416.1777 | <b>Sweep Width (Hz)</b> 16534.39       |
|                                                          |                                    | <b>Points Count</b> 32768             | <b>Pulse Sequence</b> single_pulse.ex2 |

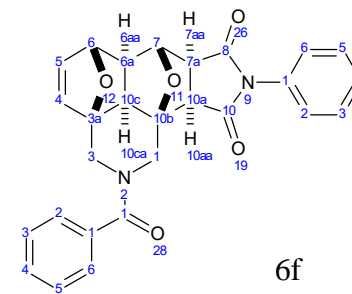

FZ8958-1.ESP

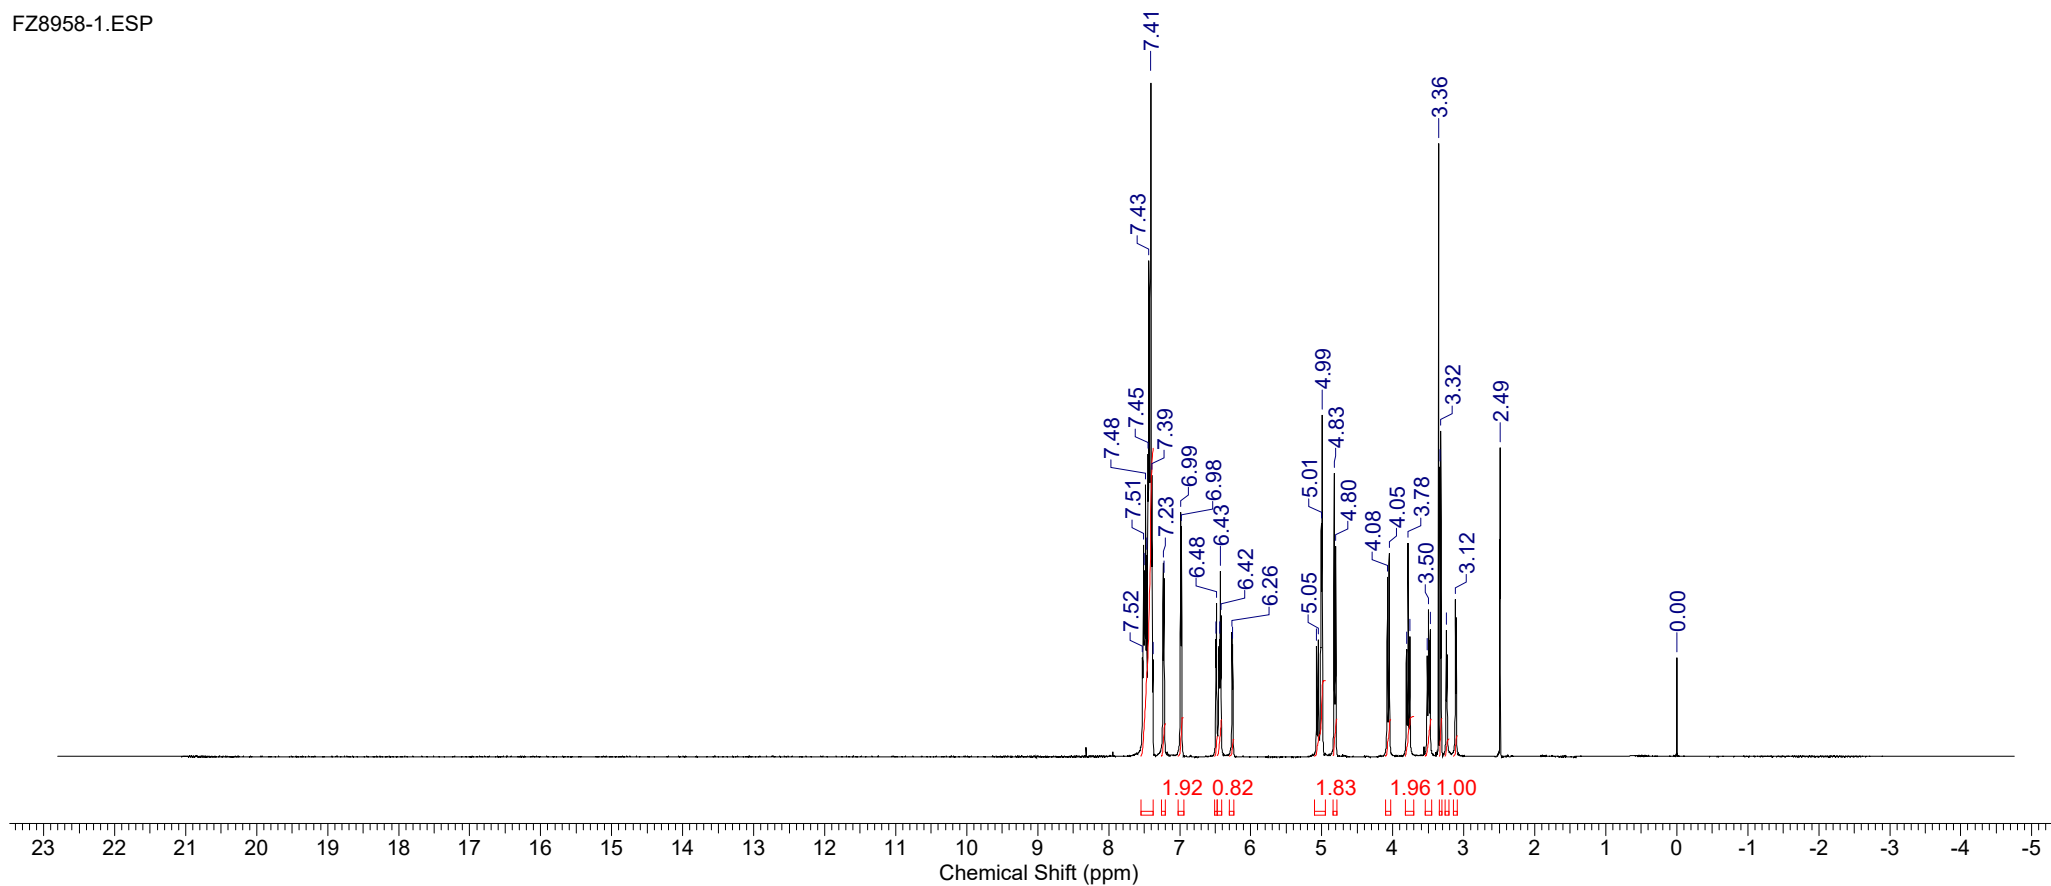

|                                                                              |                    |
|------------------------------------------------------------------------------|--------------------|
| <b>Formula</b> C <sub>27</sub> H <sub>22</sub> N <sub>2</sub> O <sub>5</sub> | <b>FW</b> 454.4740 |
|------------------------------------------------------------------------------|--------------------|

|                                                          |                                    |                                       |                                        |
|----------------------------------------------------------|------------------------------------|---------------------------------------|----------------------------------------|
| <b>Acquisition Time (sec)</b> 1.9818                     | <b>Comment</b> single_pulse        | <b>Date</b> 07 Aug 2020 11:09:45      | <b>Date Stamp</b> 07 Aug 2020 11:10:30 |
| <b>File Name</b> C:\USERS\Лабa534\DOWNLOADS\FZ8958-1.JDF | <b>Frequency (MHz)</b> 600.17      | <b>Nucleus</b> 1H                     | <b>Number of Transients</b> 8          |
| <b>Origin</b> ECA 600                                    | <b>Original Points Count</b> 32768 | <b>Owner</b> CKP                      | <b>Points Count</b> 32768              |
| <b>Receiver Gain</b> 28.00                               | <b>Solvent</b> DMSO-d6             | <b>Spectrum Offset (Hz)</b> 5416.1777 | <b>Sweep Width (Hz)</b> 16534.39       |

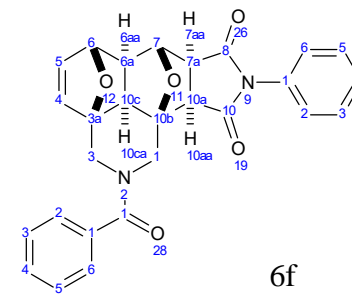

FZ8958-1.ESP

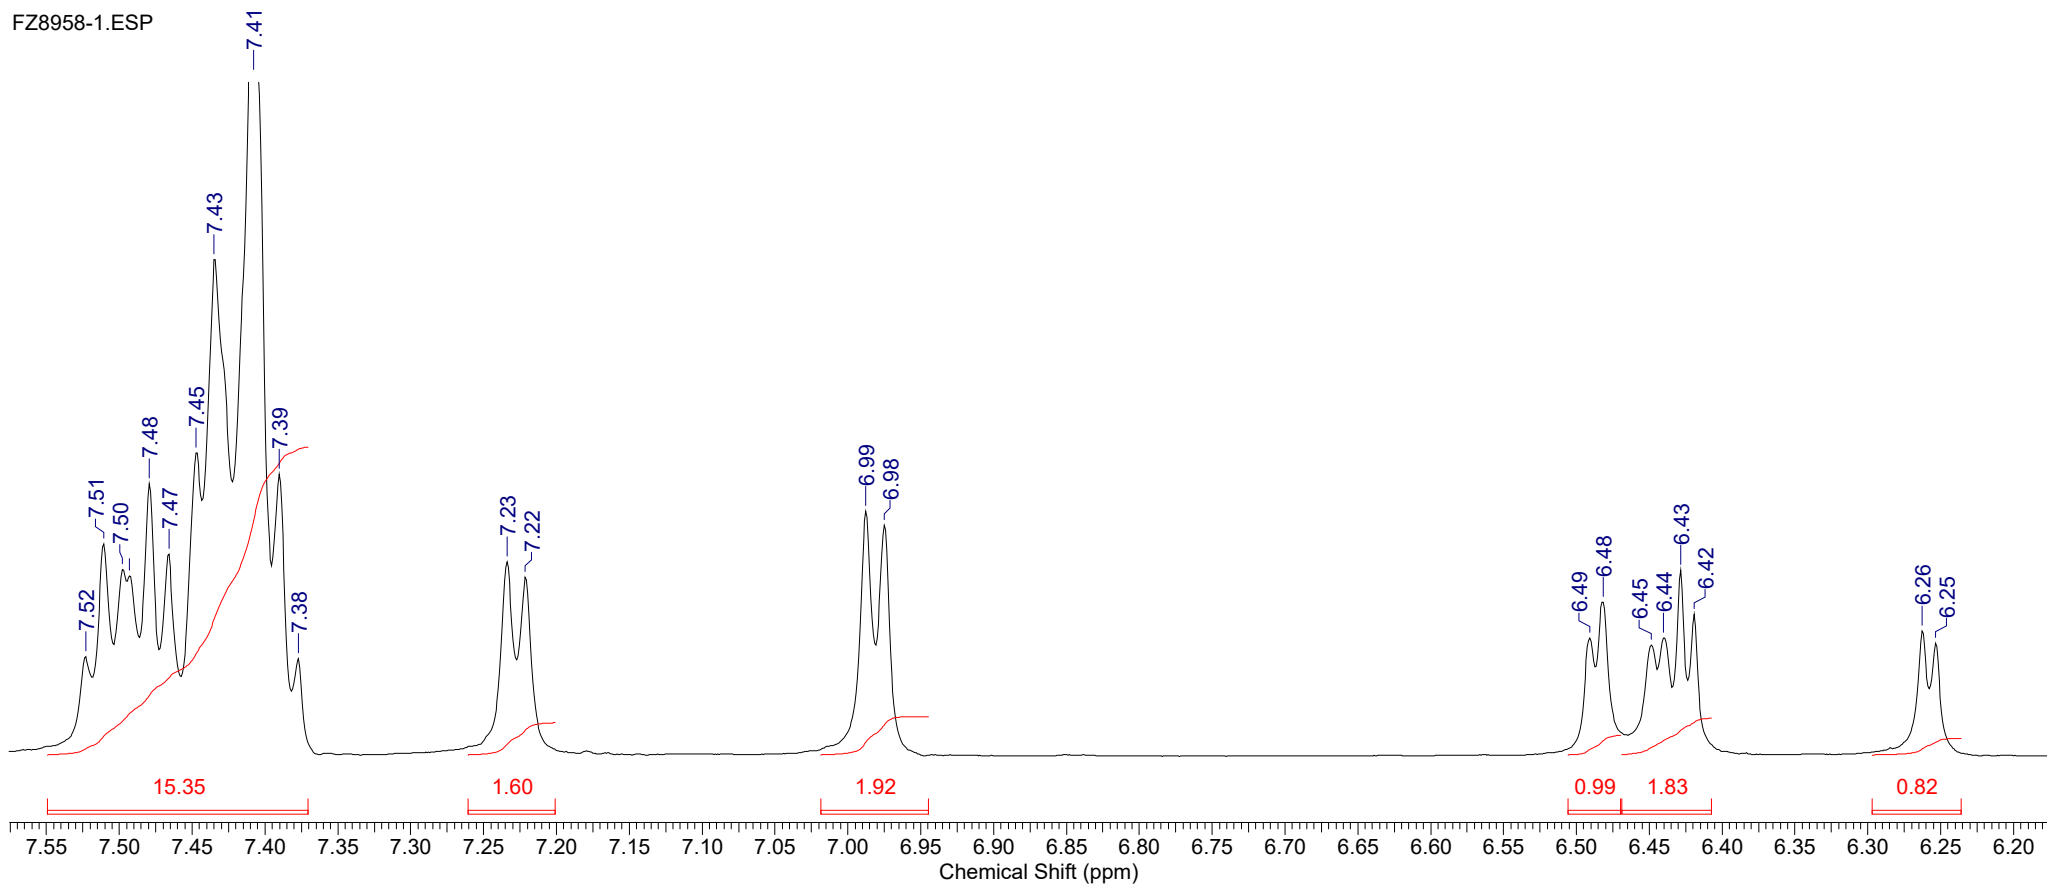

|                                                                              |                    |
|------------------------------------------------------------------------------|--------------------|
| <b>Formula</b> C <sub>27</sub> H <sub>22</sub> N <sub>2</sub> O <sub>5</sub> | <b>FW</b> 454.4740 |
|------------------------------------------------------------------------------|--------------------|

|                                                          |                                    |                                        |                                        |
|----------------------------------------------------------|------------------------------------|----------------------------------------|----------------------------------------|
| <b>Acquisition Time (sec)</b> 1.9818                     | <b>Comment</b> single_pulse        | <b>Date</b> 07 Aug 2020 11:09:45       | <b>Date Stamp</b> 07 Aug 2020 11:10:30 |
| <b>File Name</b> C:\USERS\Лабa534\DOWNLOADS\FZ8958-1.JDF | <b>Frequency (MHz)</b> 600.17      | <b>Nucleus</b> 1H                      | <b>Number of Transients</b> 8          |
| <b>Origin</b> ECA 600                                    | <b>Original Points Count</b> 32768 | <b>Owner</b> CKP                       | <b>Points Count</b> 32768              |
| <b>Receiver Gain</b> 28.00                               | <b>Solvent</b> DMSO-d6             | <b>Spectrum Offset (Hz)</b> 5416.1777  | <b>Sweep Width (Hz)</b> 16534.39       |
|                                                          |                                    | <b>Pulse Sequence</b> single_pulse.ex2 |                                        |

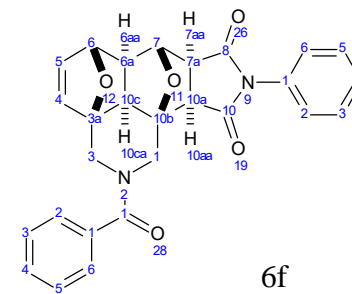

FZ8958-1.ESP

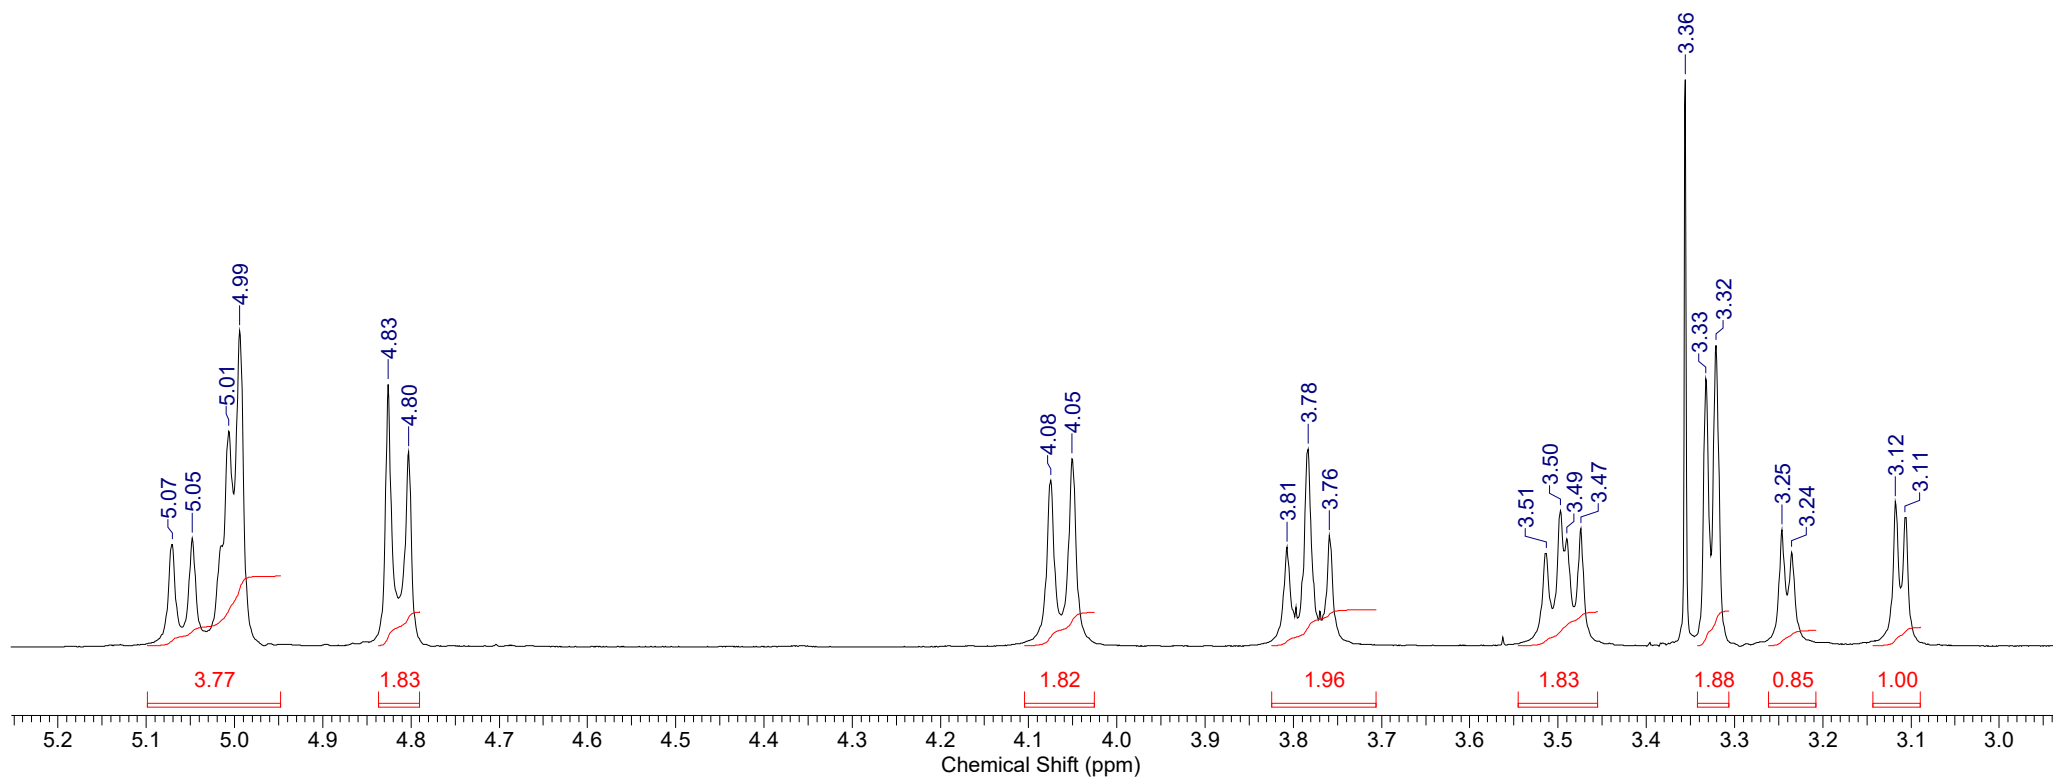

|                                                                              |                    |
|------------------------------------------------------------------------------|--------------------|
| <b>Formula</b> C <sub>27</sub> H <sub>22</sub> N <sub>2</sub> O <sub>5</sub> | <b>FW</b> 454.4740 |
|------------------------------------------------------------------------------|--------------------|

|                                        |                                                           |                                    |
|----------------------------------------|-----------------------------------------------------------|------------------------------------|
| <b>Acquisition Time (sec)</b> 0.6921   | <b>Comment</b> single pulse decoupled gated NOE           | <b>Date</b> 07 Aug 2020 12:41:16   |
| <b>Date Stamp</b> 07 Aug 2020 12:42:01 | <b>File Name</b> C:\USERS\lta6a534\DOWNLOADS\FZ8958-2.JDF | <b>Frequency (MHz)</b> 150.91      |
| <b>Nucleus</b> 13C                     | <b>Number of Transients</b> 5176                          | <b>Origin</b> ECA 600              |
| <b>Points Count</b> 32768              | <b>Pulse Sequence</b> single pulse dec                    | <b>Original Points Count</b> 32768 |
| <b>Spectrum Offset (Hz)</b> 14994.0977 | <b>Sweep Width (Hz)</b> 47348.49                          | <b>Receiver Gain</b> 58.00         |
|                                        |                                                           | <b>Solvent</b> DMSO-d6             |

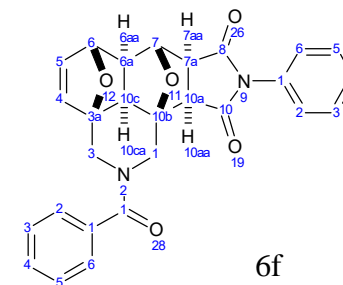

FZ8958-2.ESP

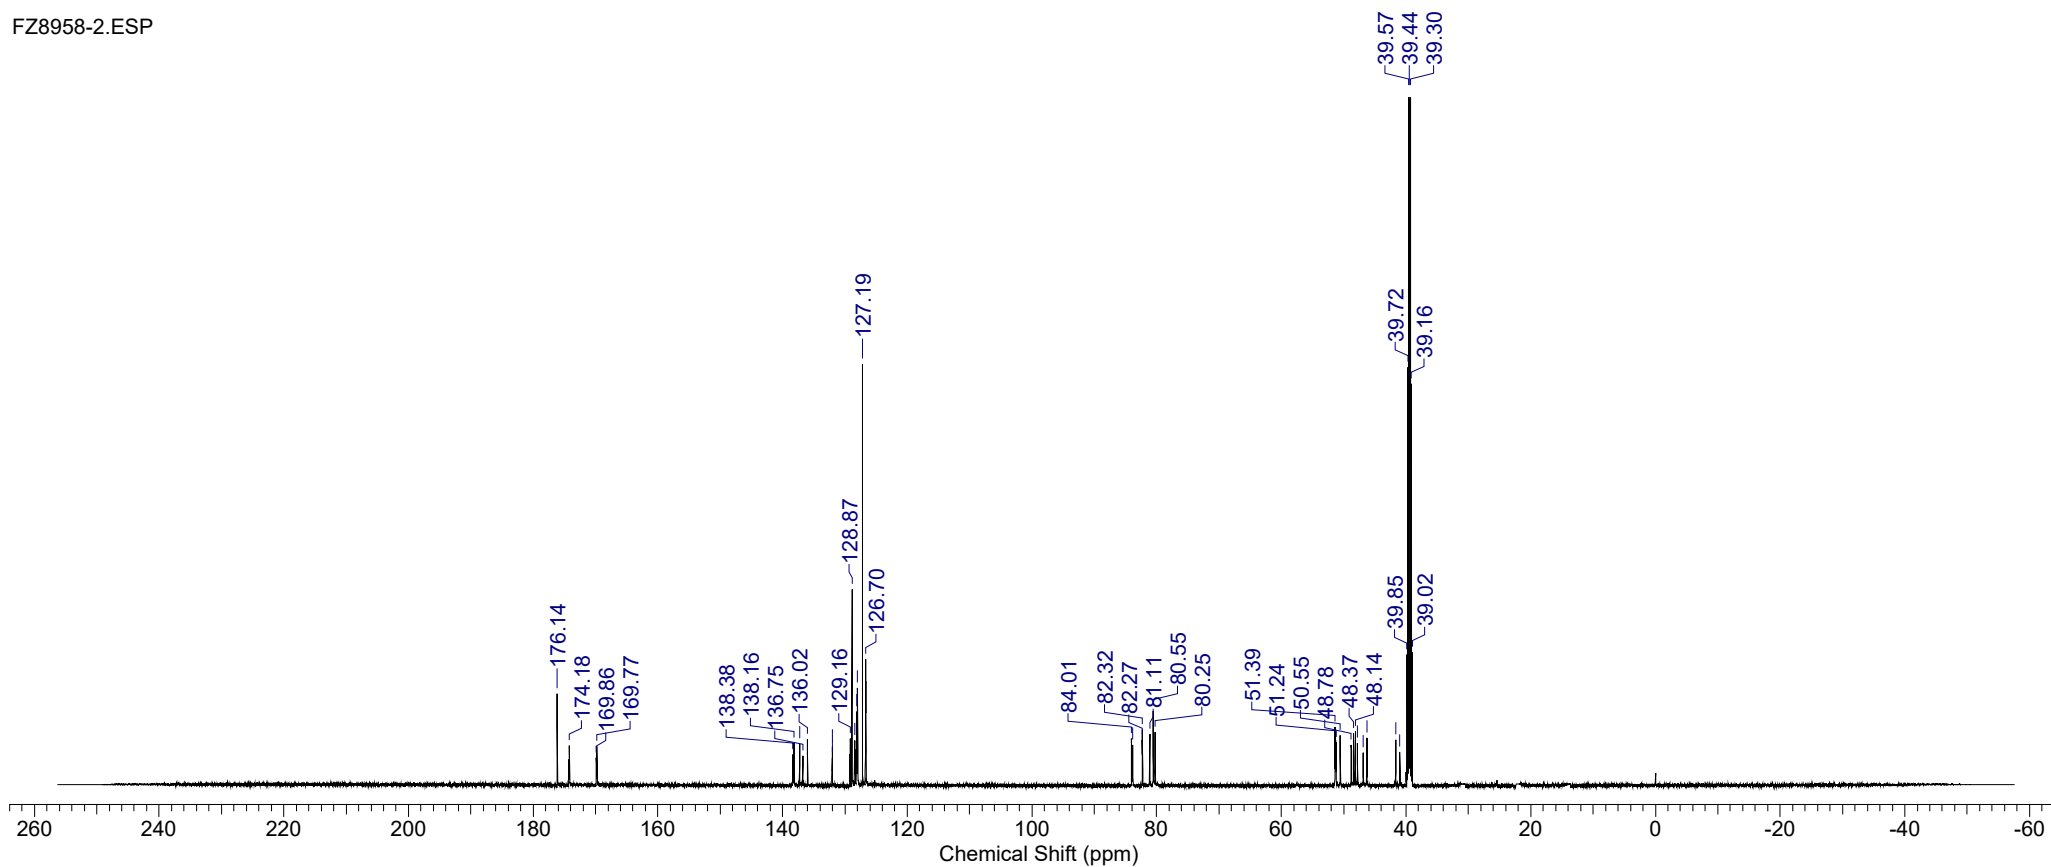

|                                                                              |                    |
|------------------------------------------------------------------------------|--------------------|
| <b>Formula</b> C <sub>27</sub> H <sub>22</sub> N <sub>2</sub> O <sub>5</sub> | <b>FW</b> 454.4740 |
|------------------------------------------------------------------------------|--------------------|

|                                        |                                                           |                                    |
|----------------------------------------|-----------------------------------------------------------|------------------------------------|
| <b>Acquisition Time (sec)</b> 0.6921   | <b>Comment</b> single pulse decoupled gated NOE           | <b>Date</b> 07 Aug 2020 12:41:16   |
| <b>Date Stamp</b> 07 Aug 2020 12:42:01 | <b>File Name</b> C:\USERS\lta6a534\DOWNLOADS\FZ8958-2.JDF | <b>Frequency (MHz)</b> 150.91      |
| <b>Nucleus</b> 13C                     | <b>Number of Transients</b> 5176                          | <b>Origin</b> ECA 600              |
| <b>Points Count</b> 32768              | <b>Pulse Sequence</b> single pulse dec                    | <b>Original Points Count</b> 32768 |
| <b>Spectrum Offset (Hz)</b> 14994.0977 | <b>Sweep Width (Hz)</b> 47348.49                          | <b>Receiver Gain</b> 58.00         |
|                                        |                                                           | <b>Solvent</b> DMSO-d6             |

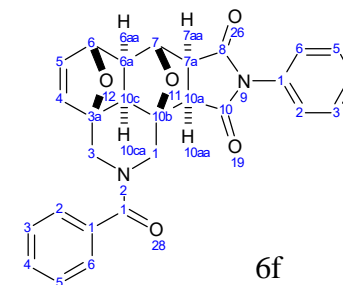

FZ8958-2.ESP

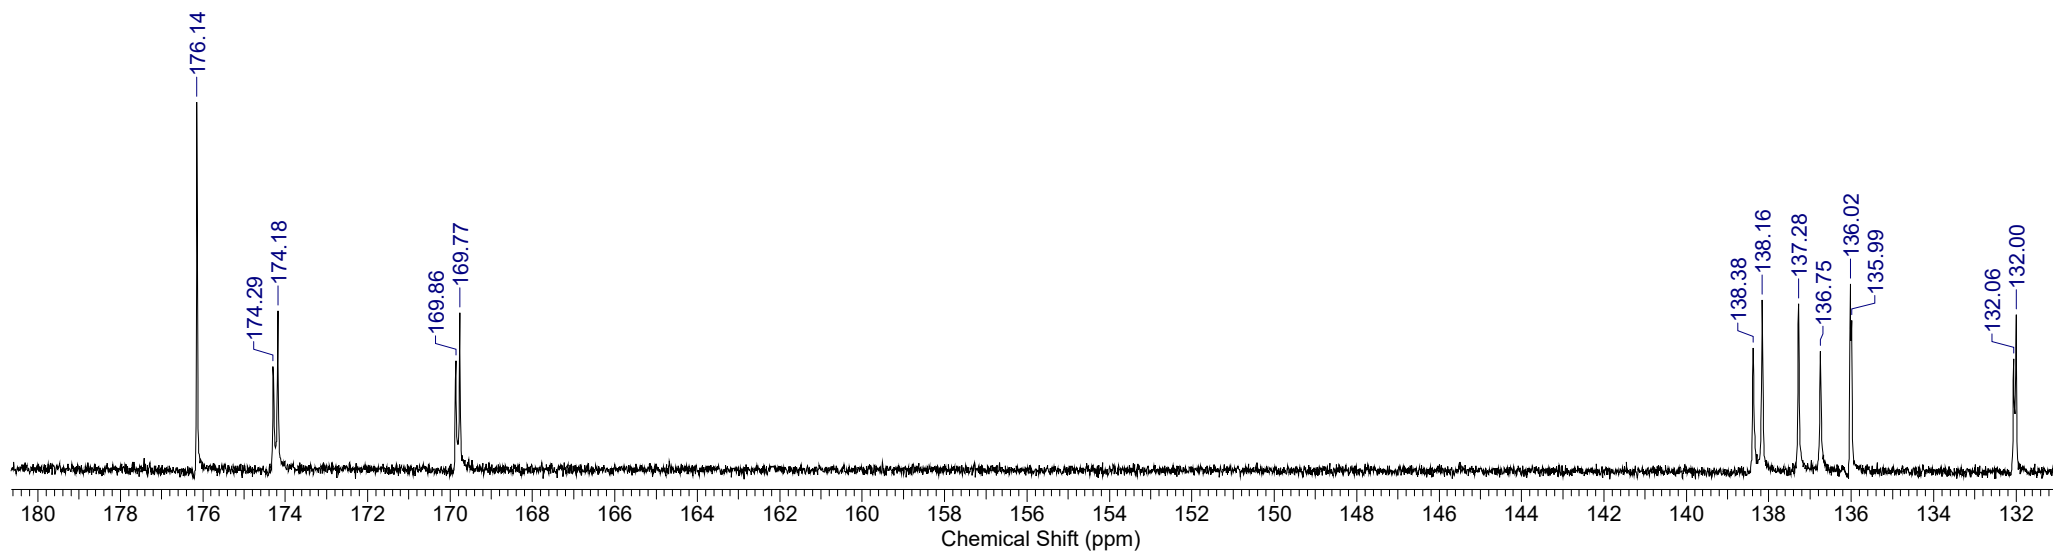

|                                                                              |                    |
|------------------------------------------------------------------------------|--------------------|
| <b>Formula</b> C <sub>27</sub> H <sub>22</sub> N <sub>2</sub> O <sub>5</sub> | <b>FW</b> 454.4740 |
|------------------------------------------------------------------------------|--------------------|

|                                        |                                                           |                                  |                                    |                  |
|----------------------------------------|-----------------------------------------------------------|----------------------------------|------------------------------------|------------------|
| <b>Acquisition Time (sec)</b> 0.6921   | <b>Comment</b> single pulse decoupled gated NOE           | <b>Date</b> 07 Aug 2020 12:41:16 |                                    |                  |
| <b>Date Stamp</b> 07 Aug 2020 12:42:01 | <b>File Name</b> C:\USERS\l1a6a534\DOWNLOADS\FZ8958-2.JDF | <b>Frequency (MHz)</b> 150.91    |                                    |                  |
| <b>Nucleus</b> 13C                     | <b>Number of Transients</b> 5176                          | <b>Origin</b> ECA 600            | <b>Original Points Count</b> 32768 | <b>Owner</b> CKP |
| <b>Points Count</b> 32768              | <b>Pulse Sequence</b> single pulse dec                    | <b>Receiver Gain</b> 58.00       | <b>Solvent</b> DMSO-d6             |                  |
| <b>Spectrum Offset (Hz)</b> 14994.0977 | <b>Sweep Width (Hz)</b> 47348.49                          |                                  |                                    |                  |

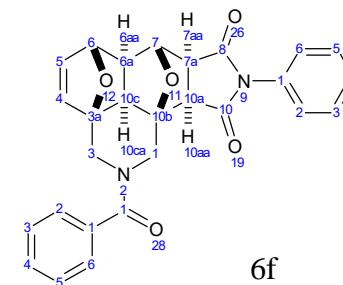

FZ8958-2.ESP

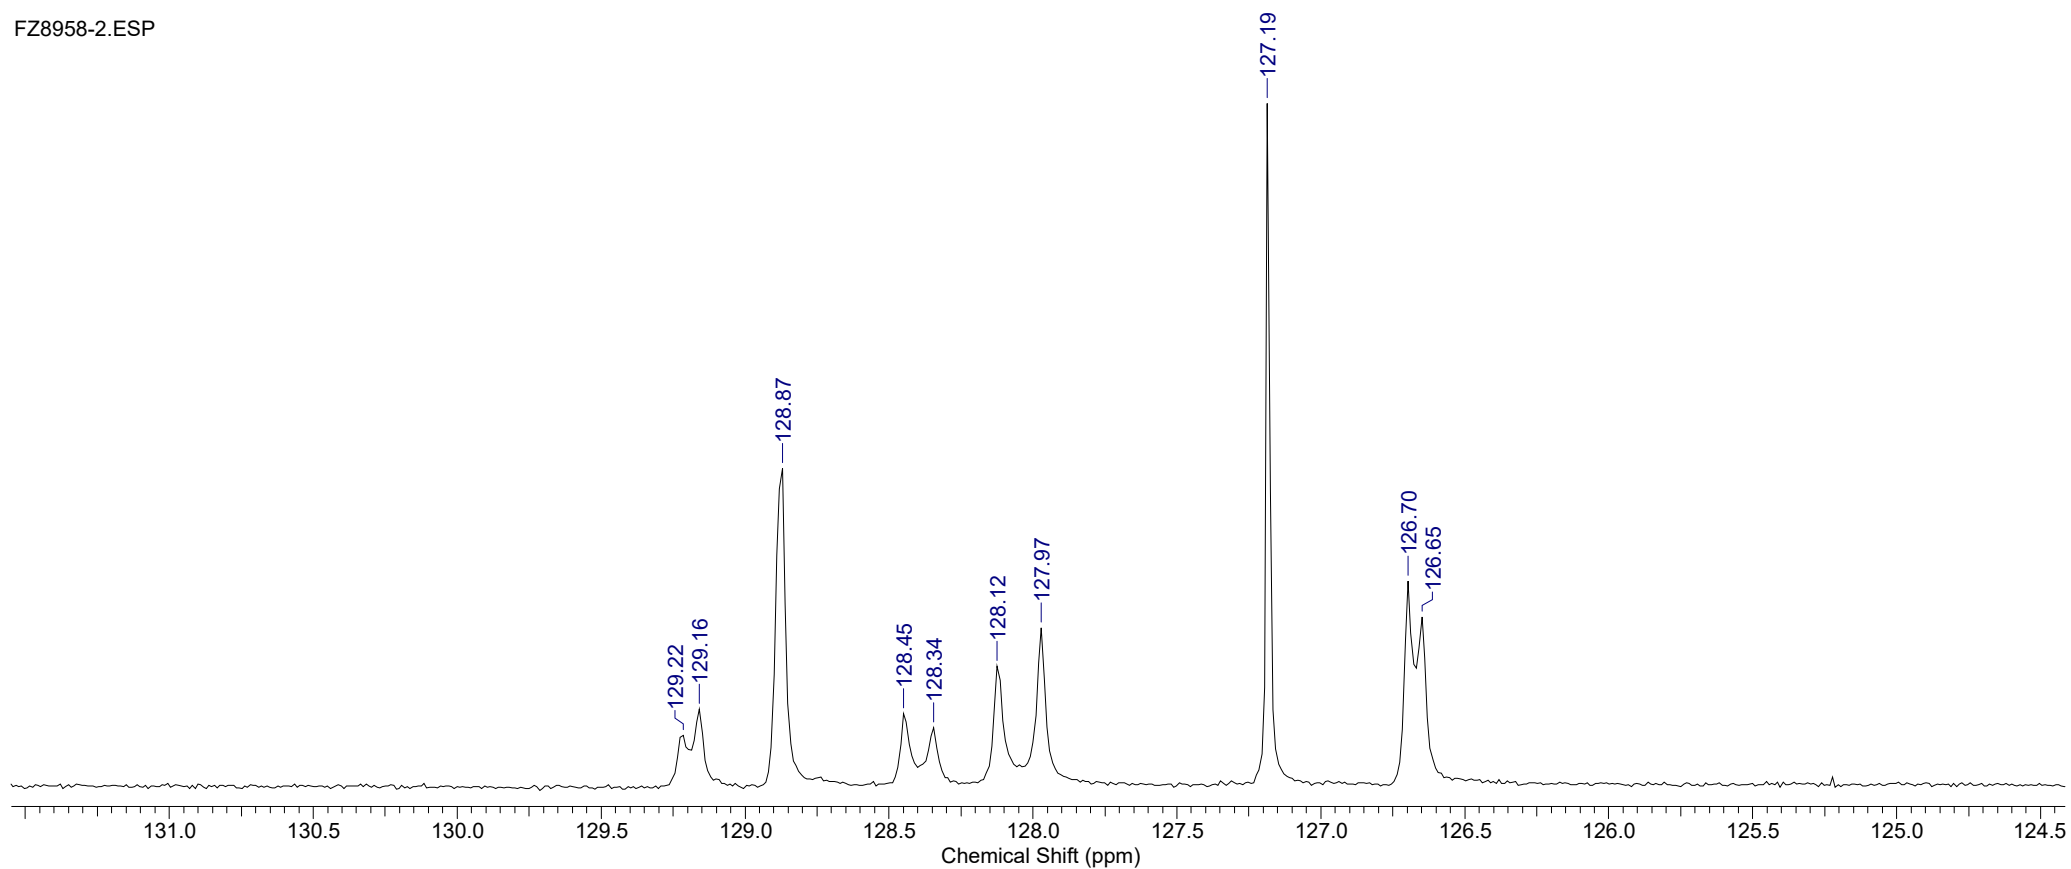

|                                                                              |                    |
|------------------------------------------------------------------------------|--------------------|
| <b>Formula</b> C <sub>27</sub> H <sub>22</sub> N <sub>2</sub> O <sub>5</sub> | <b>FW</b> 454.4740 |
|------------------------------------------------------------------------------|--------------------|

|                                        |                                                           |                                    |
|----------------------------------------|-----------------------------------------------------------|------------------------------------|
| <b>Acquisition Time (sec)</b> 0.6921   | <b>Comment</b> single pulse decoupled gated NOE           | <b>Date</b> 07 Aug 2020 12:41:16   |
| <b>Date Stamp</b> 07 Aug 2020 12:42:01 | <b>File Name</b> C:\USERS\lta6a534\DOWNLOADS\FZ8958-2.JDF | <b>Frequency (MHz)</b> 150.91      |
| <b>Nucleus</b> 13C                     | <b>Number of Transients</b> 5176                          | <b>Origin</b> ECA 600              |
| <b>Points Count</b> 32768              | <b>Pulse Sequence</b> single pulse dec                    | <b>Original Points Count</b> 32768 |
| <b>Spectrum Offset (Hz)</b> 14994.0977 | <b>Sweep Width (Hz)</b> 47348.49                          | <b>Receiver Gain</b> 58.00         |
|                                        |                                                           | <b>Solvent</b> DMSO-d6             |

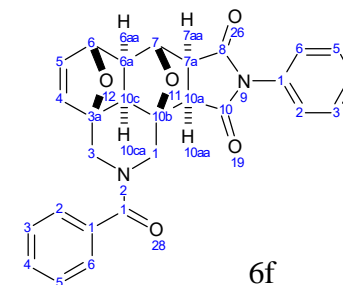

FZ8958-2.ESP

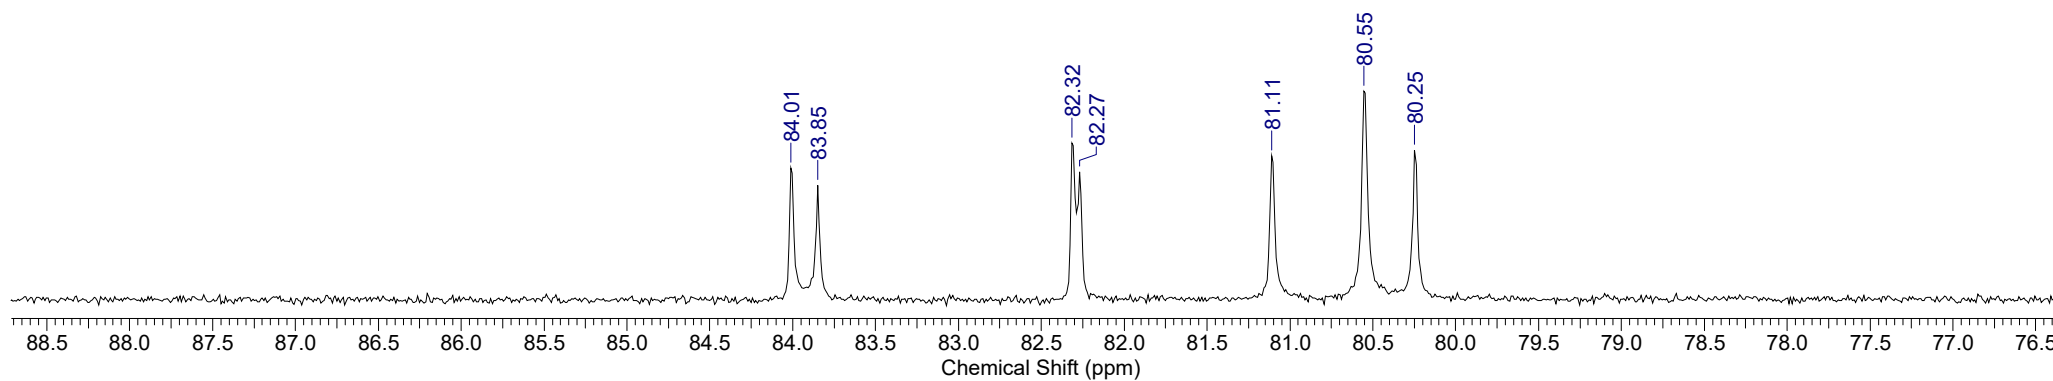

|                                                                              |                    |
|------------------------------------------------------------------------------|--------------------|
| <b>Formula</b> C <sub>27</sub> H <sub>22</sub> N <sub>2</sub> O <sub>5</sub> | <b>FW</b> 454.4740 |
|------------------------------------------------------------------------------|--------------------|

|                                        |                                                          |                                    |
|----------------------------------------|----------------------------------------------------------|------------------------------------|
| <b>Acquisition Time (sec)</b> 0.6921   | <b>Comment</b> single pulse decoupled gated NOE          | <b>Date</b> 07 Aug 2020 12:41:16   |
| <b>Date Stamp</b> 07 Aug 2020 12:42:01 | <b>File Name</b> C:\USERS\Ia6a534\DOWNLOADS\FZ8958-2.JDF | <b>Frequency (MHz)</b> 150.91      |
| <b>Nucleus</b> 13C                     | <b>Number of Transients</b> 5176                         | <b>Origin</b> ECA 600              |
| <b>Points Count</b> 32768              | <b>Pulse Sequence</b> single pulse dec                   | <b>Original Points Count</b> 32768 |
| <b>Spectrum Offset (Hz)</b> 14994.0977 | <b>Sweep Width (Hz)</b> 47348.49                         | <b>Receiver Gain</b> 58.00         |
|                                        |                                                          | <b>Solvent</b> DMSO-d6             |

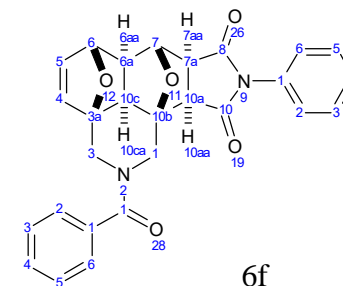

FZ8958-2.ESP

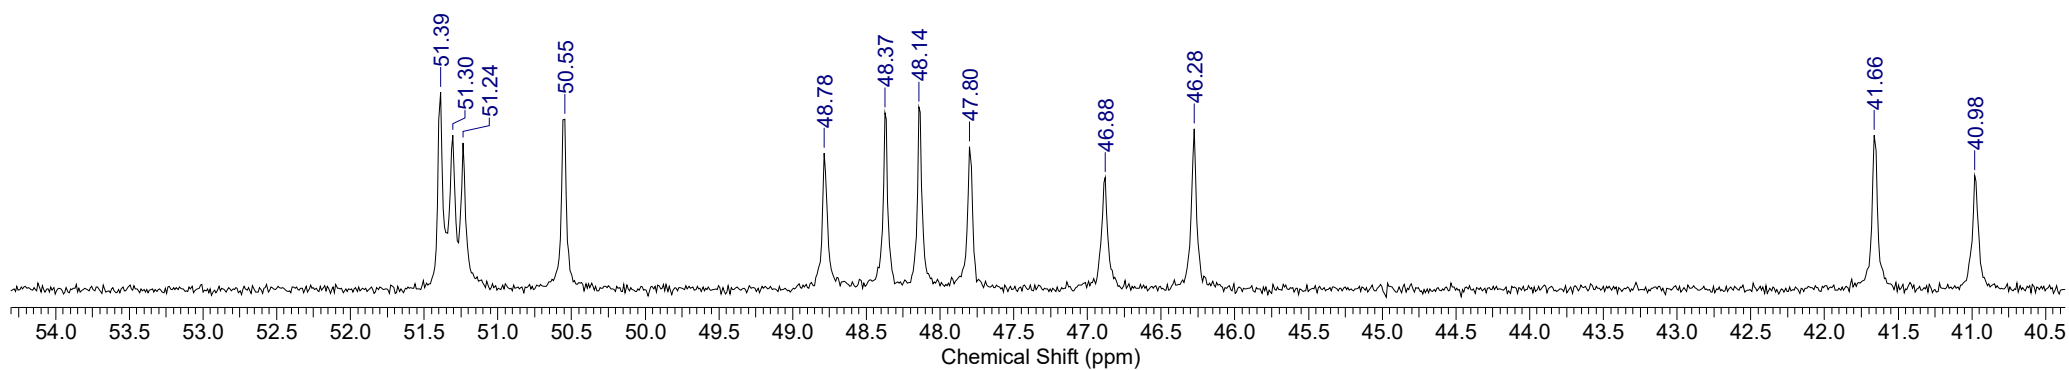



|                                                                |                    |
|----------------------------------------------------------------|--------------------|
| <b>Formula</b> C <sub>20</sub> H <sub>17</sub> NO <sub>5</sub> | <b>FW</b> 351.3527 |
|----------------------------------------------------------------|--------------------|

|                                                          |                                    |                                       |                                        |
|----------------------------------------------------------|------------------------------------|---------------------------------------|----------------------------------------|
| <b>Acquisition Time (sec)</b> 1.4549                     | <b>Comment</b> single_pulse        | <b>Date</b> 19 Feb 2014 11:08:20      | <b>Date Stamp</b> 19 Feb 2014 10:18:13 |
| <b>File Name</b> C:\USERS\laba534\DOWNLOADS\FZ3622-1.JDF | <b>Frequency (MHz)</b> 600.17      | <b>Nucleus</b> 1H                     | <b>Number of Transients</b> 8          |
| <b>Origin</b> ECA 600                                    | <b>Original Points Count</b> 16384 | <b>Owner</b> delta                    | <b>Points Count</b> 16384              |
| <b>Receiver Gain</b> 40.00                               | <b>Solvent</b> DMSO-d6             | <b>Spectrum Offset (Hz)</b> 3022.0435 | <b>Sweep Width (Hz)</b> 11261.26       |
|                                                          |                                    |                                       | <b>Temperature (degree C)</b> 24.400   |

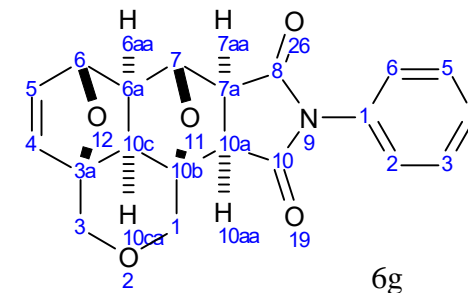

FZ3622-1.JDF

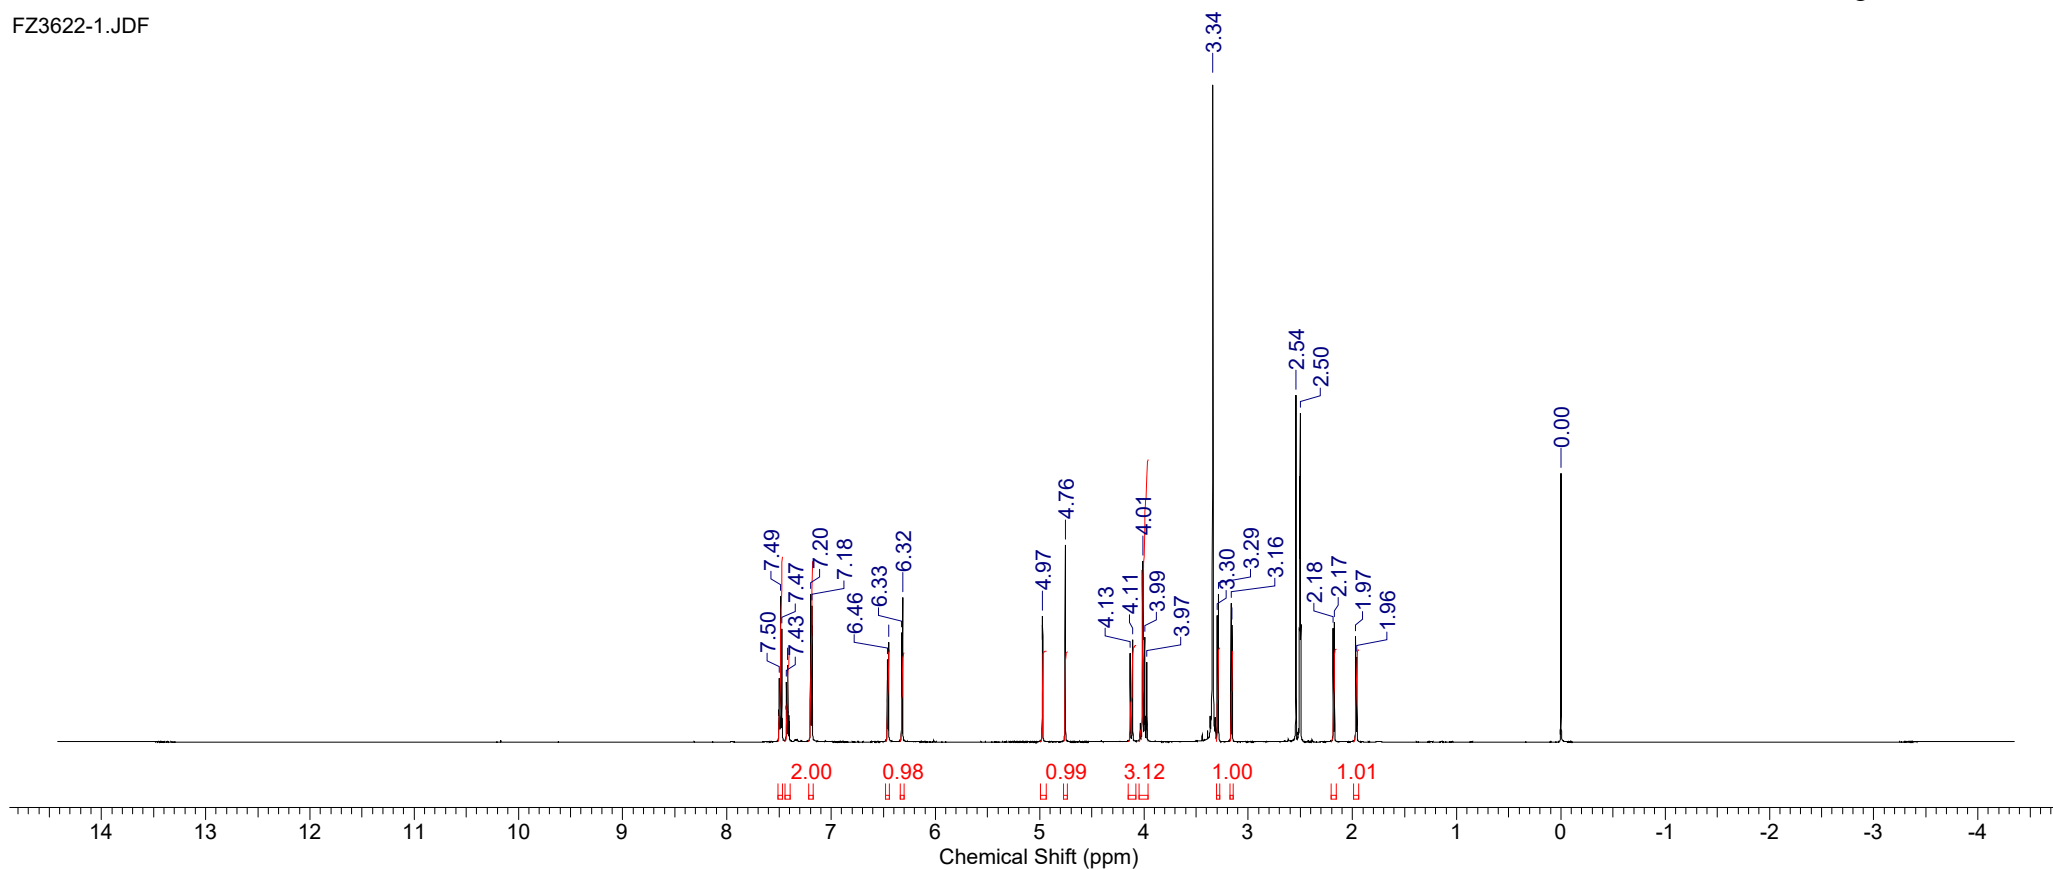

|                                                                |                    |
|----------------------------------------------------------------|--------------------|
| <b>Formula</b> C <sub>20</sub> H <sub>17</sub> NO <sub>5</sub> | <b>FW</b> 351.3527 |
|----------------------------------------------------------------|--------------------|

|                                                          |                                    |                                       |                                        |
|----------------------------------------------------------|------------------------------------|---------------------------------------|----------------------------------------|
| <b>Acquisition Time (sec)</b> 1.4549                     | <b>Comment</b> single_pulse        | <b>Date</b> 19 Feb 2014 11:08:20      | <b>Date Stamp</b> 19 Feb 2014 10:18:13 |
| <b>File Name</b> C:\USERS\Лаба534\DOWNLOADS\FZ3622-1.JDF | <b>Frequency (MHz)</b> 600.17      | <b>Nucleus</b> 1H                     | <b>Number of Transients</b> 8          |
| <b>Origin</b> ECA 600                                    | <b>Original Points Count</b> 16384 | <b>Owner</b> delta                    | <b>Points Count</b> 16384              |
| <b>Receiver Gain</b> 40.00                               | <b>Solvent</b> DMSO-d6             | <b>Spectrum Offset (Hz)</b> 3022.0435 | <b>Sweep Width (Hz)</b> 11261.26       |
|                                                          |                                    | <b>Temperature (degree C)</b> 24.400  |                                        |

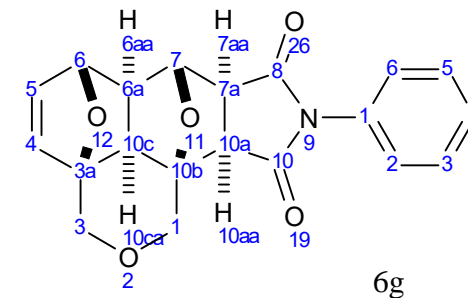

FZ3622-1.JDF

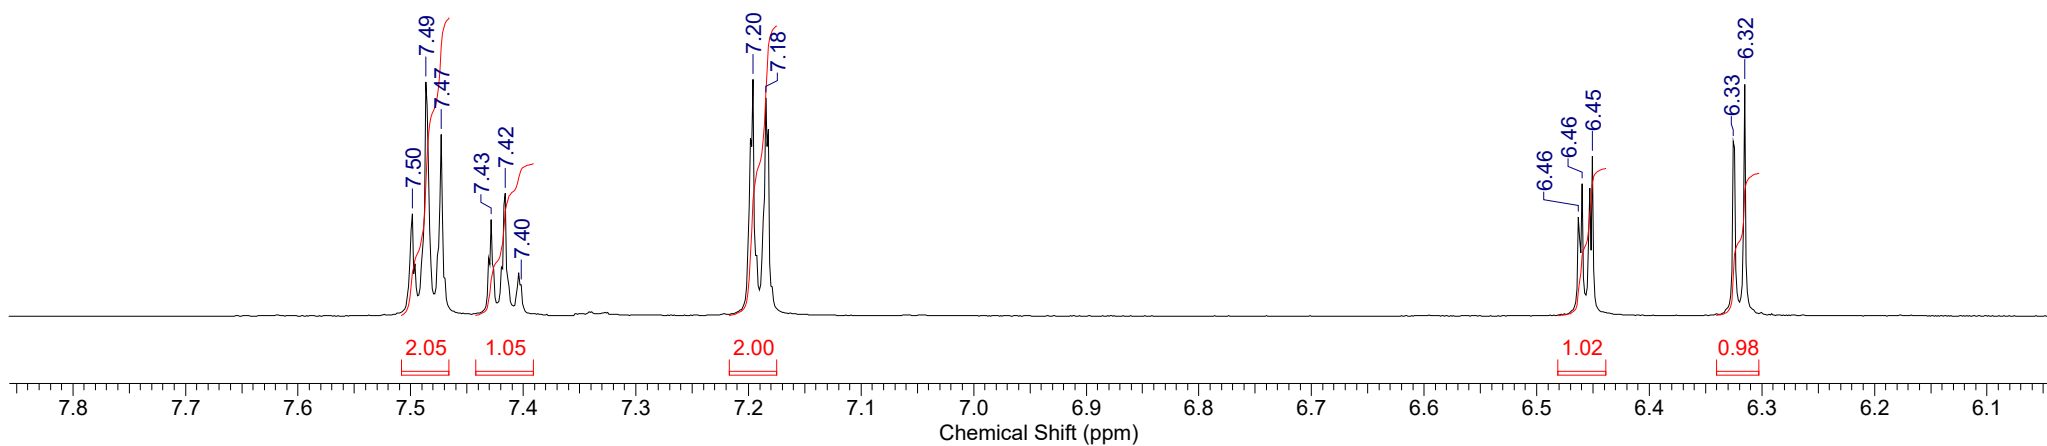

|                                                                |                    |
|----------------------------------------------------------------|--------------------|
| <b>Formula</b> C <sub>20</sub> H <sub>17</sub> NO <sub>5</sub> | <b>FW</b> 351.3527 |
|----------------------------------------------------------------|--------------------|

|                                                          |                                    |                                       |                                        |
|----------------------------------------------------------|------------------------------------|---------------------------------------|----------------------------------------|
| <b>Acquisition Time (sec)</b> 1.4549                     | <b>Comment</b> single_pulse        | <b>Date</b> 19 Feb 2014 11:08:20      | <b>Date Stamp</b> 19 Feb 2014 10:18:13 |
| <b>File Name</b> C:\USERS\laba534\DOWNLOADS\FZ3622-1.JDF | <b>Frequency (MHz)</b> 600.17      | <b>Nucleus</b> 1H                     | <b>Number of Transients</b> 8          |
| <b>Origin</b> ECA 600                                    | <b>Original Points Count</b> 16384 | <b>Owner</b> delta                    | <b>Points Count</b> 16384              |
| <b>Receiver Gain</b> 40.00                               | <b>Solvent</b> DMSO-d6             | <b>Spectrum Offset (Hz)</b> 3022.0435 | <b>Sweep Width (Hz)</b> 11261.26       |
|                                                          |                                    |                                       | <b>Temperature (degree C)</b> 24.400   |

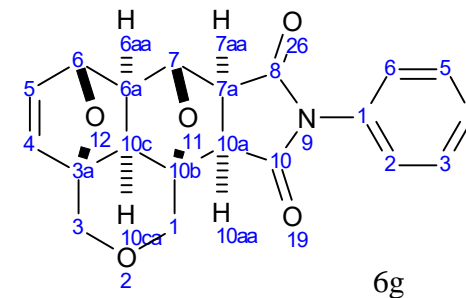

FZ3622-1.JDF

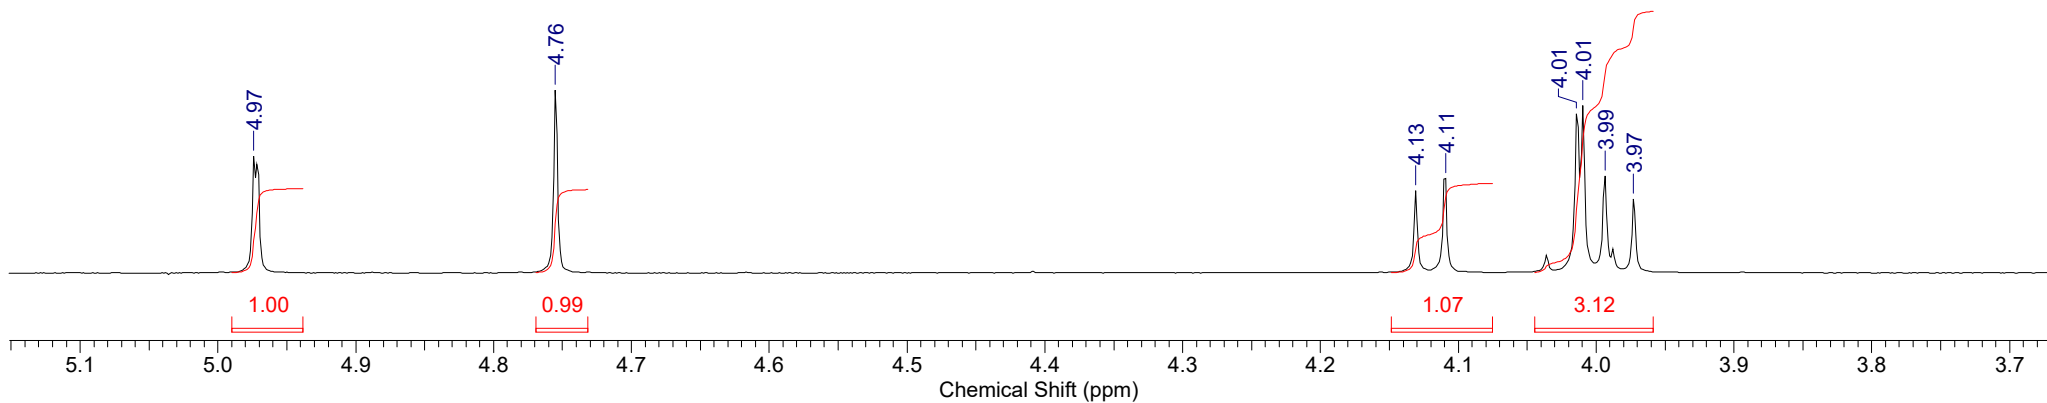

|                                                                |                    |
|----------------------------------------------------------------|--------------------|
| <b>Formula</b> C <sub>20</sub> H <sub>17</sub> NO <sub>5</sub> | <b>FW</b> 351.3527 |
|----------------------------------------------------------------|--------------------|

|                                                           |                                    |                                       |                                        |
|-----------------------------------------------------------|------------------------------------|---------------------------------------|----------------------------------------|
| <b>Acquisition Time (sec)</b> 1.4549                      | <b>Comment</b> single_pulse        | <b>Date</b> 19 Feb 2014 11:08:20      | <b>Date Stamp</b> 19 Feb 2014 10:18:13 |
| <b>File Name</b> C:\USERS\lab6a534\DOWNLOADS\FZ3622-1.JDF | <b>Frequency (MHz)</b> 600.17      | <b>Nucleus</b> 1H                     | <b>Number of Transients</b> 8          |
| <b>Origin</b> ECA 600                                     | <b>Original Points Count</b> 16384 | <b>Owner</b> delta                    | <b>Points Count</b> 16384              |
| <b>Receiver Gain</b> 40.00                                | <b>Solvent</b> DMSO-d6             | <b>Spectrum Offset (Hz)</b> 3022.0435 | <b>Sweep Width (Hz)</b> 11261.26       |
|                                                           |                                    |                                       | <b>Temperature (degree C)</b> 24.400   |

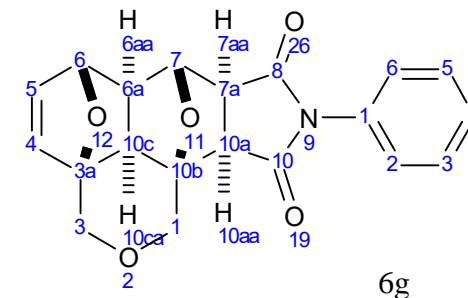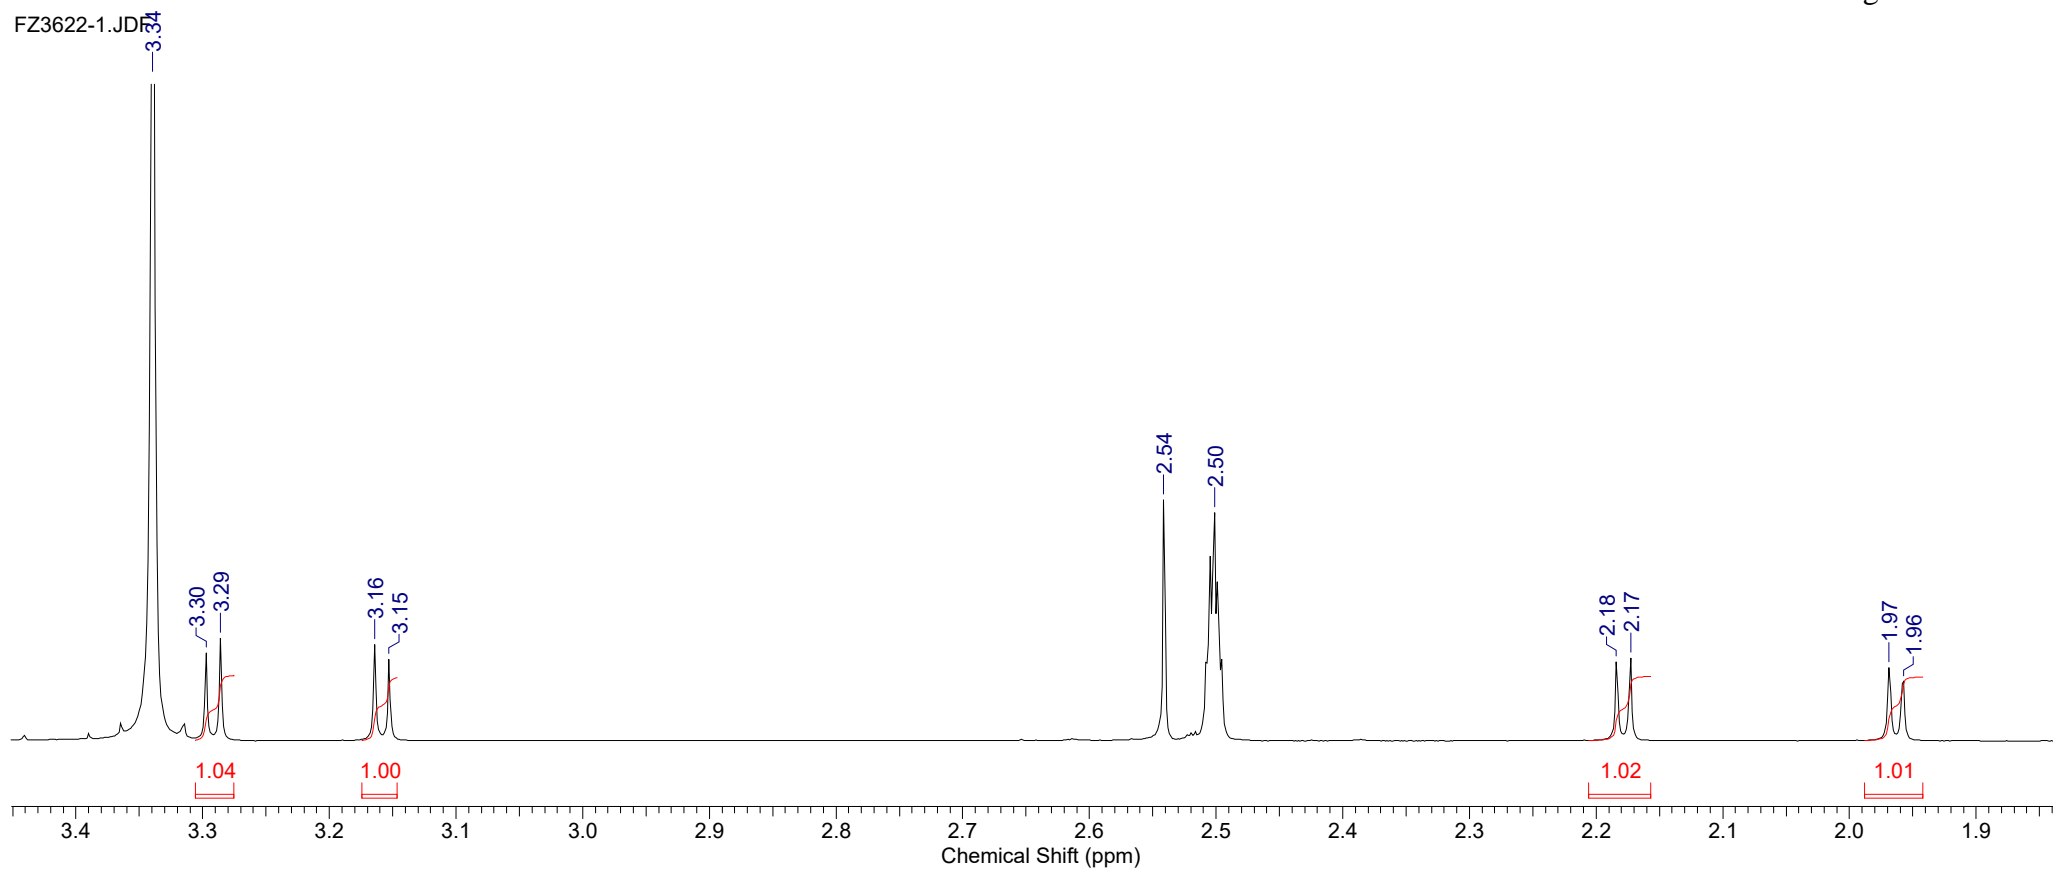

|                                                                |                    |
|----------------------------------------------------------------|--------------------|
| <b>Formula</b> C <sub>20</sub> H <sub>17</sub> NO <sub>5</sub> | <b>FW</b> 351.3527 |
|----------------------------------------------------------------|--------------------|

|                                        |                                                                             |                                        |
|----------------------------------------|-----------------------------------------------------------------------------|----------------------------------------|
| <b>Acquisition Time (sec)</b> 0.5571   | <b>Comment</b> 5 mm QNP 1H/15N/13C/31P Z3379/0400                           | <b>Date</b> 06 May 2014 22:38:56       |
| <b>Date Stamp</b> 06 May 2014 22:38:56 | <b>File Name</b> C:\USERS\lta6a534\DESKTOP\FZ-0414-KVYAT-17A-C13DEC_001001r |                                        |
| <b>Frequency (MHz)</b> 100.61          | <b>Nucleus</b> 13C                                                          | <b>Number of Transients</b> 25464      |
| <b>Original Points Count</b> 16384     | <b>Owner</b> root                                                           | <b>Origin</b> spect                    |
| <b>Receiver Gain</b> 32768.00          | <b>SW(cyclical) (Hz)</b> 29411.77                                           | <b>Points Count</b> 65536              |
| <b>Sweep Width (Hz)</b> 29411.32       | <b>Temperature (degree C)</b> 90.000                                        | <b>Pulse Sequence</b> zgpg             |
|                                        | <b>Solvent</b> DMSO-d6                                                      | <b>Spectrum Offset (Hz)</b> 10502.3320 |

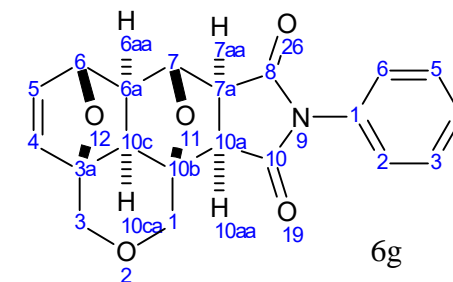

FZ-0414-KVYAT-17A-C13DEC\_001001r

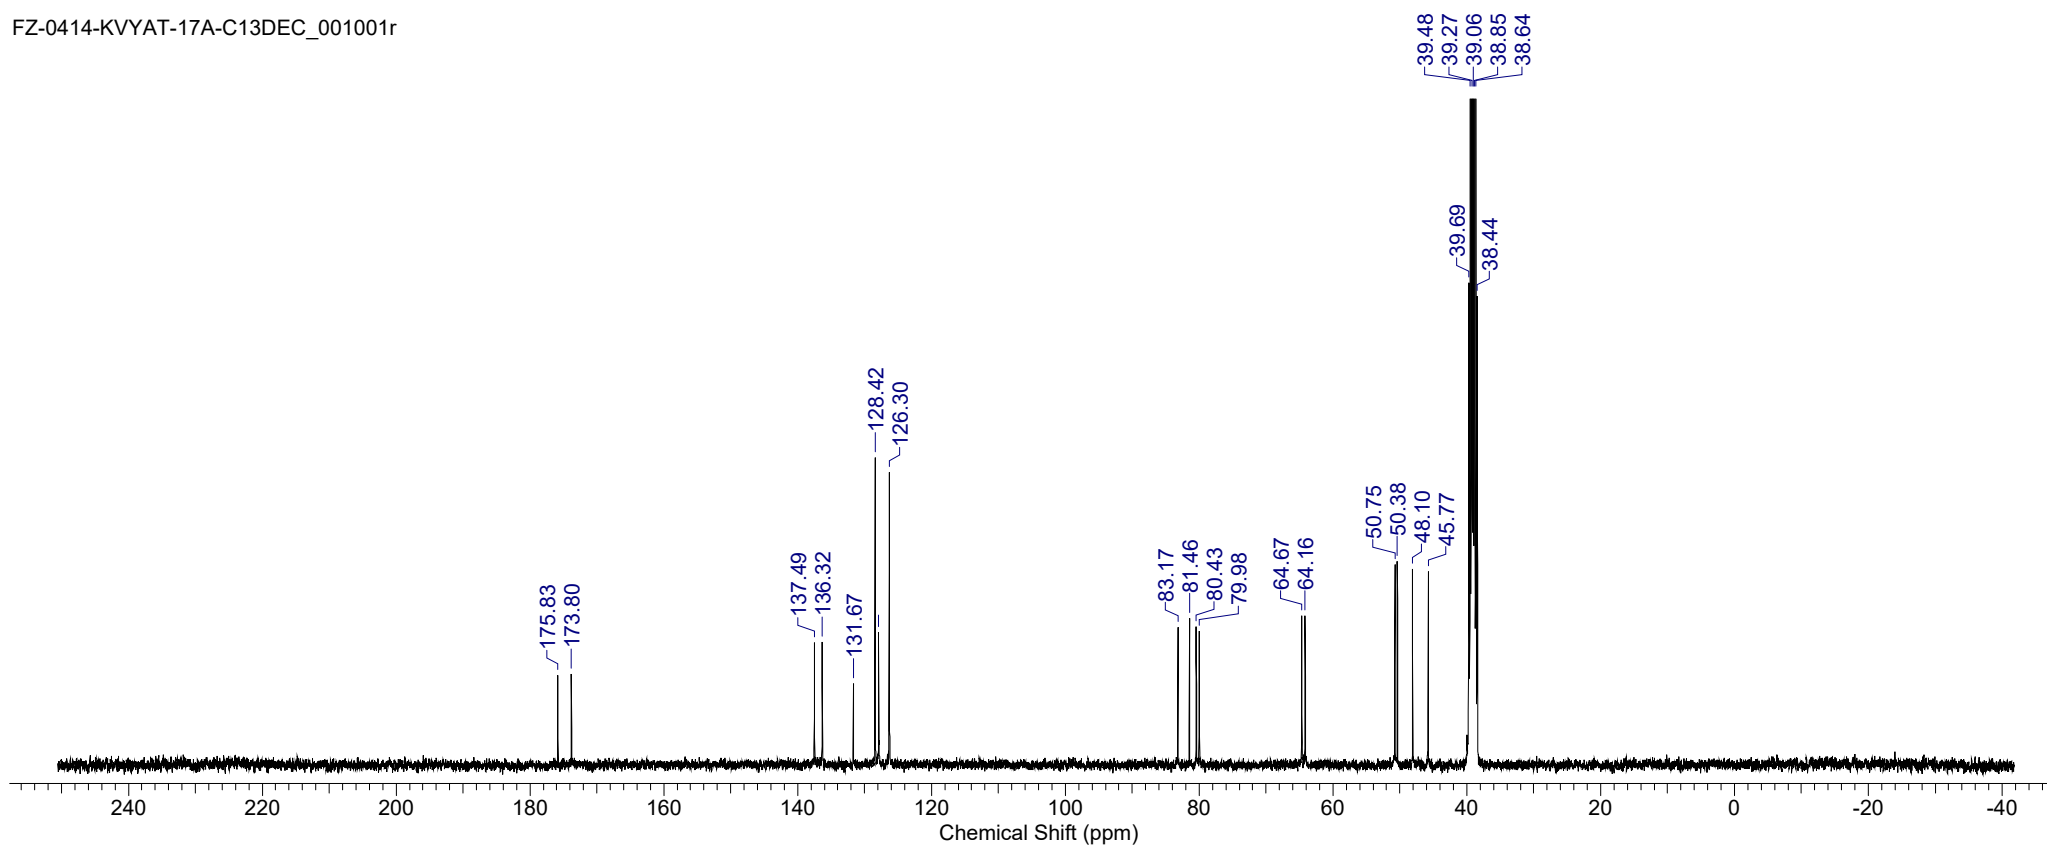

|                                                                |                    |
|----------------------------------------------------------------|--------------------|
| <b>Formula</b> C <sub>20</sub> H <sub>17</sub> NO <sub>5</sub> | <b>FW</b> 351.3527 |
|----------------------------------------------------------------|--------------------|

|                                        |                                                                             |                                        |
|----------------------------------------|-----------------------------------------------------------------------------|----------------------------------------|
| <b>Acquisition Time (sec)</b> 0.5571   | <b>Comment</b> 5 mm QNP 1H/15N/13C/31P Z3379/0400                           | <b>Date</b> 06 May 2014 22:38:56       |
| <b>Date Stamp</b> 06 May 2014 22:38:56 | <b>File Name</b> C:\USERS\lta6a534\DESKTOP\FZ-0414-KVYAT-17A-C13DEC_001001r |                                        |
| <b>Frequency (MHz)</b> 100.61          | <b>Nucleus</b> 13C                                                          | <b>Number of Transients</b> 25464      |
| <b>Original Points Count</b> 16384     | <b>Owner</b> root                                                           | <b>Origin</b> spect                    |
| <b>Receiver Gain</b> 32768.00          | <b>SW(cyclical) (Hz)</b> 29411.77                                           | <b>Points Count</b> 65536              |
| <b>Sweep Width (Hz)</b> 29411.32       | <b>Temperature (degree C)</b> 90.000                                        | <b>Pulse Sequence</b> zgpg             |
|                                        | <b>Solvent</b> DMSO-d6                                                      | <b>Spectrum Offset (Hz)</b> 10502.3320 |

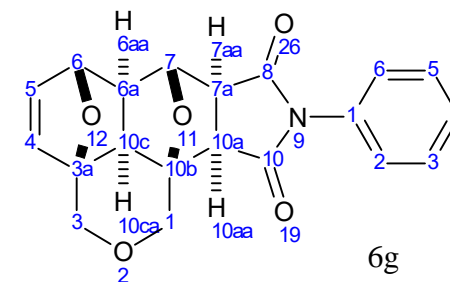

FZ-0414-KVYAT-17A-C13DEC\_001001r

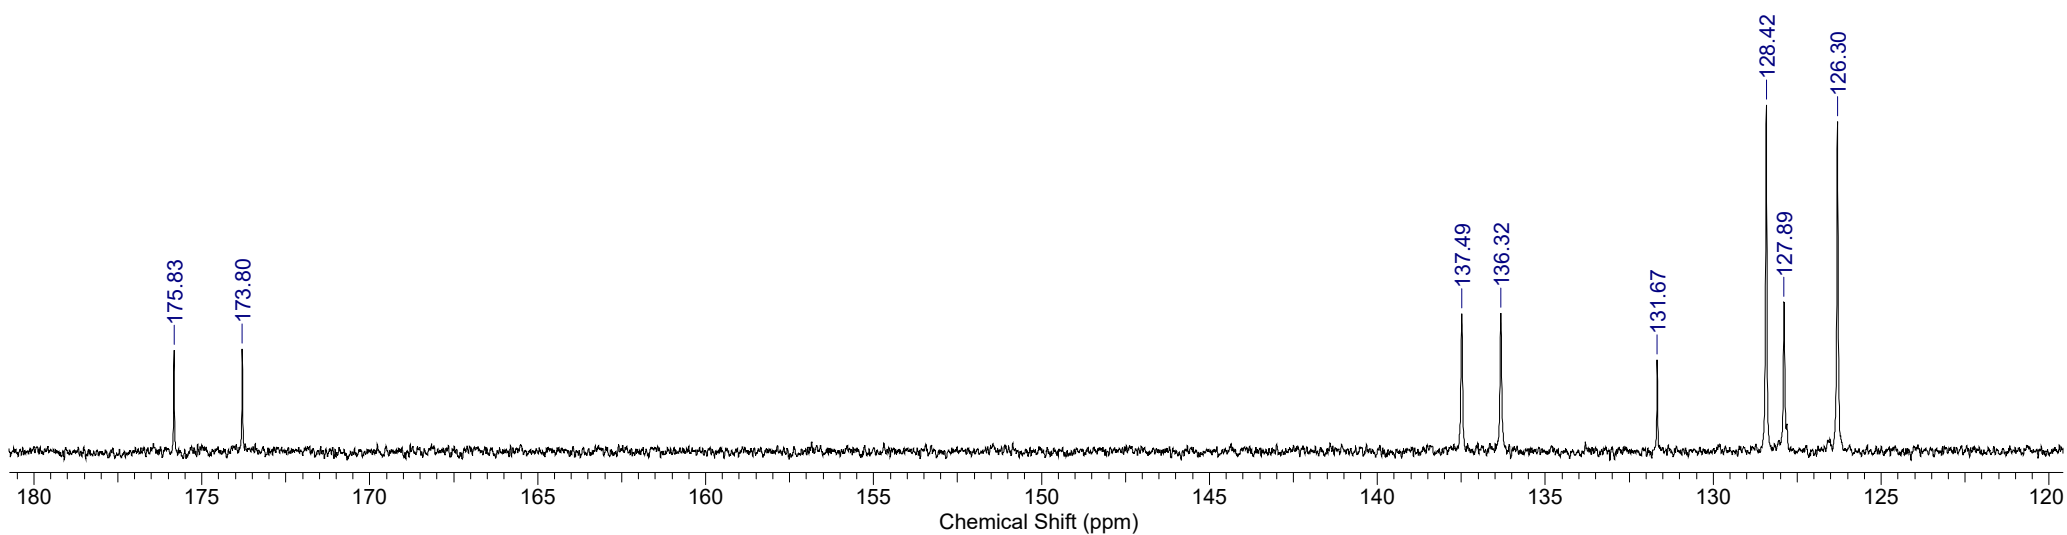

|                                                                |                    |
|----------------------------------------------------------------|--------------------|
| <b>Formula</b> C <sub>20</sub> H <sub>17</sub> NO <sub>5</sub> | <b>FW</b> 351.3527 |
|----------------------------------------------------------------|--------------------|

|                                        |                                                                             |                                        |
|----------------------------------------|-----------------------------------------------------------------------------|----------------------------------------|
| <b>Acquisition Time (sec)</b> 0.5571   | <b>Comment</b> 5 mm QNP 1H/15N/13C/31P Z3379/0400                           | <b>Date</b> 06 May 2014 22:38:56       |
| <b>Date Stamp</b> 06 May 2014 22:38:56 | <b>File Name</b> C:\USERS\lta6a534\DESKTOP\FZ-0414-KVYAT-17A-C13DEC_001001r |                                        |
| <b>Frequency (MHz)</b> 100.61          | <b>Nucleus</b> 13C                                                          | <b>Number of Transients</b> 25464      |
| <b>Original Points Count</b> 16384     | <b>Owner</b> root                                                           | <b>Points Count</b> 65536              |
| <b>Receiver Gain</b> 32768.00          | <b>SW(cyclical) (Hz)</b> 29411.77                                           | <b>Pulse Sequence</b> zgpg             |
| <b>Sweep Width (Hz)</b> 29411.32       | <b>Solvent</b> DMSO-d6                                                      | <b>Spectrum Offset (Hz)</b> 10502.3320 |
|                                        | <b>Temperature (degree C)</b> 90.000                                        |                                        |

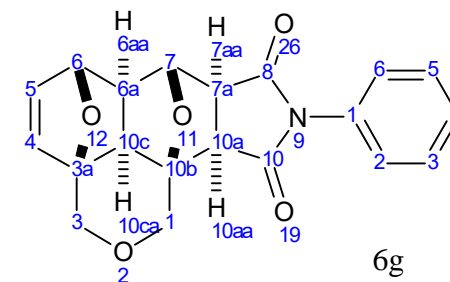

FZ-0414-KVYAT-17A-C13DEC\_001001r

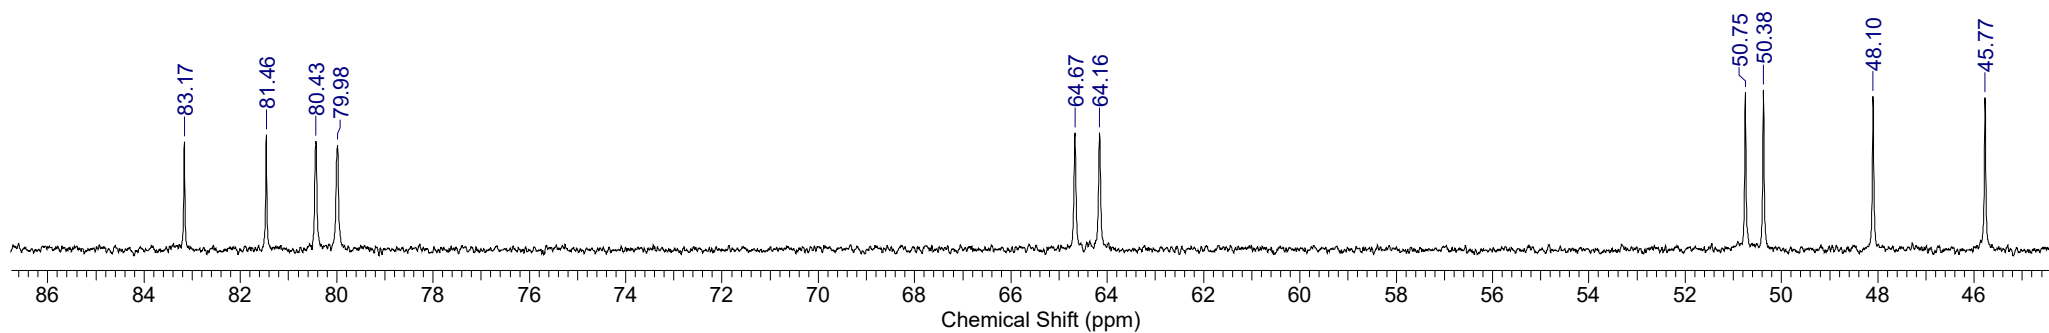

|                                                                  |                    |
|------------------------------------------------------------------|--------------------|
| <b>Formula</b> C <sub>20</sub> H <sub>17</sub> NO <sub>4</sub> S | <b>FW</b> 367.4183 |
|------------------------------------------------------------------|--------------------|

|                                                          |                                    |                                        |                                        |
|----------------------------------------------------------|------------------------------------|----------------------------------------|----------------------------------------|
| <b>Acquisition Time (sec)</b> 1.2111                     | <b>Comment</b> single_pulse        | <b>Date</b> 18 Mar 2015 13:24:26       | <b>Date Stamp</b> 18 Mar 2015 12:30:13 |
| <b>File Name</b> C:\USERS\Лабa534\DOWNLOADS\FZ4139-1.JDF | <b>Frequency (MHz)</b> 600.17      | <b>Nucleus</b> 1H                      | <b>Number of Transients</b> 8          |
| <b>Origin</b> ECA 600                                    | <b>Original Points Count</b> 16384 | <b>Owner</b> delta                     | <b>Points Count</b> 16384              |
| <b>Receiver Gain</b> 46.00                               | <b>Solvent</b> DMSO-d6             | <b>Spectrum Offset (Hz)</b> 3623.7708  | <b>Sweep Width (Hz)</b> 13528.14       |
|                                                          |                                    | <b>Pulse Sequence</b> single_pulse.ex2 |                                        |

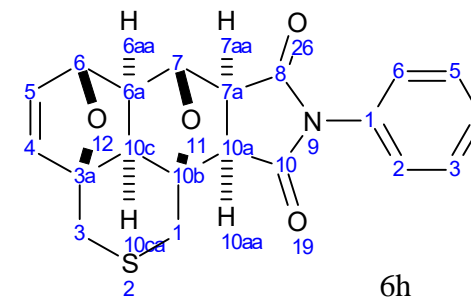

FZ4139-1.JDF

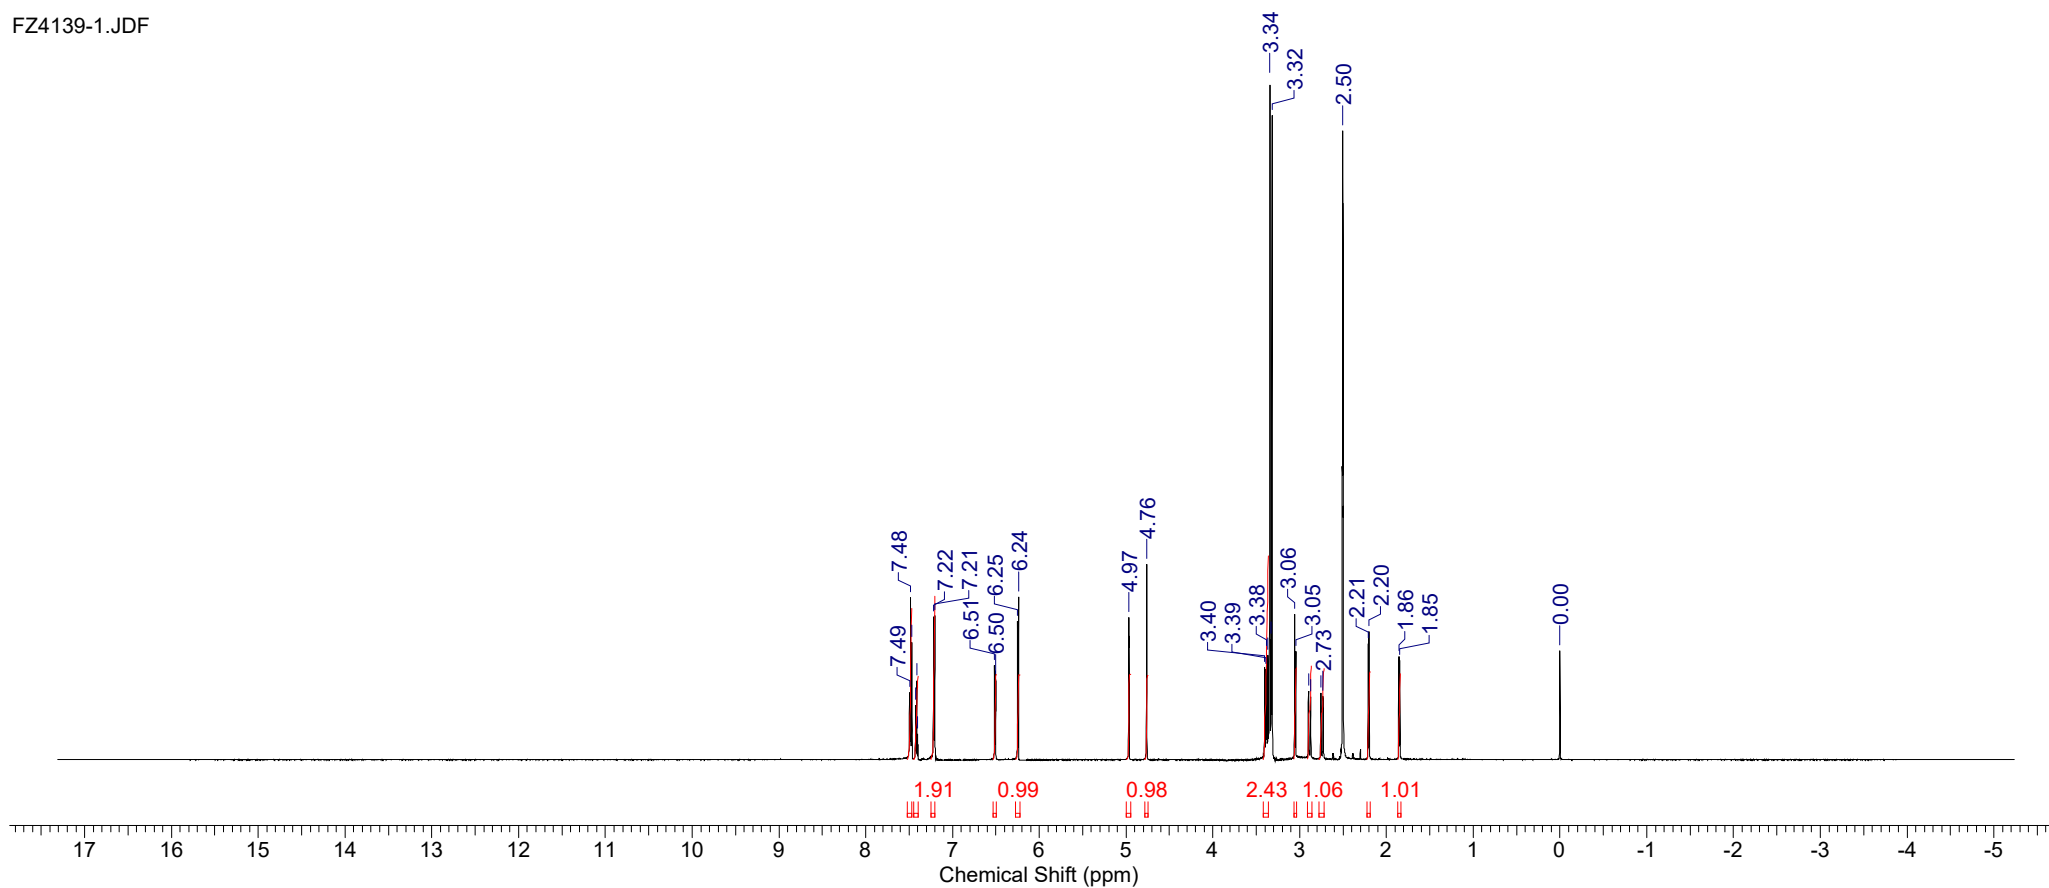



|                                                                  |                    |
|------------------------------------------------------------------|--------------------|
| <b>Formula</b> C <sub>20</sub> H <sub>17</sub> NO <sub>4</sub> S | <b>FW</b> 367.4183 |
|------------------------------------------------------------------|--------------------|

|                                                          |                                    |                                       |                                        |
|----------------------------------------------------------|------------------------------------|---------------------------------------|----------------------------------------|
| <b>Acquisition Time (sec)</b> 1.2111                     | <b>Comment</b> single_pulse        | <b>Date</b> 18 Mar 2015 13:24:26      | <b>Date Stamp</b> 18 Mar 2015 12:30:13 |
| <b>File Name</b> C:\USERS\Лабa534\DOWNLOADS\FZ4139-1.JDF | <b>Frequency (MHz)</b> 600.17      | <b>Nucleus</b> 1H                     | <b>Number of Transients</b> 8          |
| <b>Origin</b> ECA 600                                    | <b>Original Points Count</b> 16384 | <b>Owner</b> delta                    | <b>Points Count</b> 16384              |
| <b>Receiver Gain</b> 46.00                               | <b>Solvent</b> DMSO-d6             | <b>Spectrum Offset (Hz)</b> 3623.7708 | <b>Sweep Width (Hz)</b> 13528.14       |
|                                                          |                                    |                                       | <b>Pulse Sequence</b> single_pulse.ex2 |

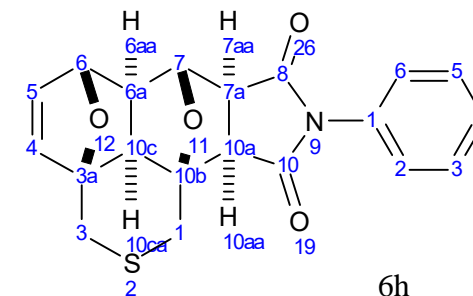

FZ4139-1.JDF

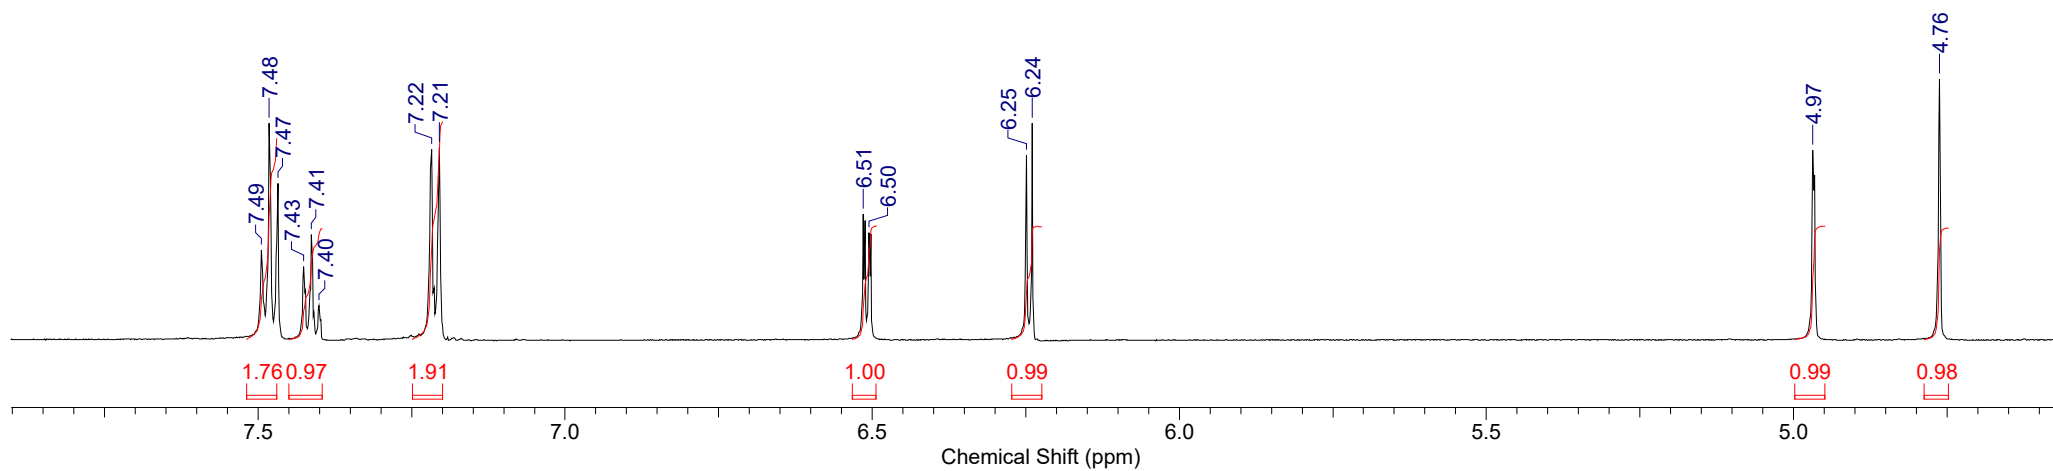

Formula C<sub>20</sub>H<sub>17</sub>NO<sub>4</sub>S FW 367.4183

|                        |                                         |                       |              |                      |                      |                      |                      |
|------------------------|-----------------------------------------|-----------------------|--------------|----------------------|----------------------|----------------------|----------------------|
| Acquisition Time (sec) | 1.2111                                  | Comment               | single_pulse | Date                 | 18 Mar 2015 13:24:26 | Date Stamp           | 18 Mar 2015 12:30:13 |
| File Name              | C:\USERS\Лабa534\DOWNLOADS\FZ4139-1.JDF | Frequency (MHz)       | 600.17       | Nucleus              | 1H                   | Number of Transients | 8                    |
| Origin                 | ECA 600                                 | Original Points Count | 16384        | Owner                | delta                | Points Count         | 16384                |
| Receiver Gain          | 46.00                                   | Solvent               | DMSO-d6      | Spectrum Offset (Hz) | 3623.7708            | Sweep Width (Hz)     | 13528.14             |
|                        |                                         |                       |              |                      |                      | Pulse Sequence       | single_pulse.ex2     |

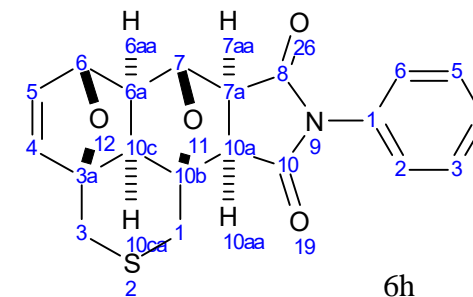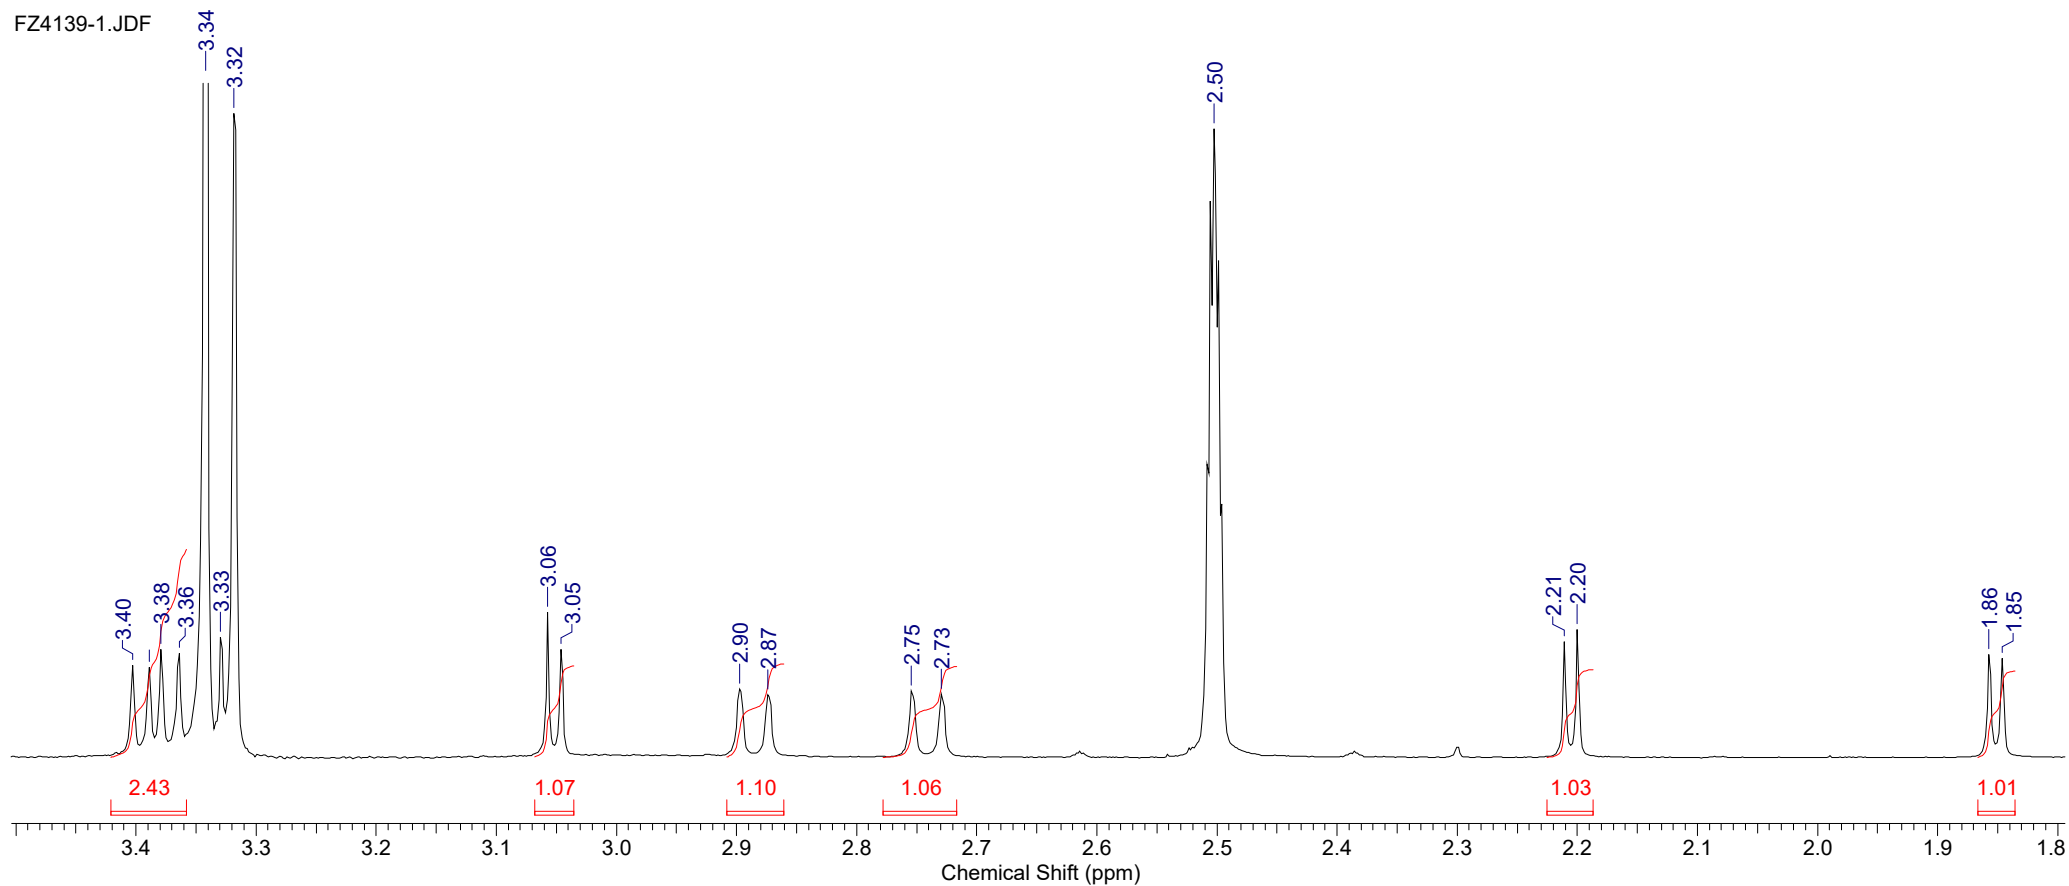

Formula C<sub>20</sub>H<sub>17</sub>NO<sub>4</sub>S FW 367.4183

|                        |                      |                        |                                         |                      |                      |
|------------------------|----------------------|------------------------|-----------------------------------------|----------------------|----------------------|
| Acquisition Time (sec) | 0.6921               | Comment                | single pulse decoupled gated NOE        | Date                 | 06 May 2015 10:46:46 |
| Date Stamp             | 06 May 2015 09:53:16 | File Name              | C:\USERS\Лабa534\DOWNLOADS\FZ4270-1.JDF |                      |                      |
| Frequency (MHz)        | 150.91               | Nucleus                | 13C                                     | Number of Transients | 100                  |
| Original Points Count  | 32768                | Owner                  | delta                                   | Points Count         | 32768                |
| Receiver Gain          | 52.00                | Solvent                | CHLOROFORM-d                            | Pulse Sequence       | single pulse dec     |
| Sweep Width (Hz)       | 47348.49             | Temperature (degree C) | 21.000                                  | Spectrum Offset (Hz) | 15091.3428           |

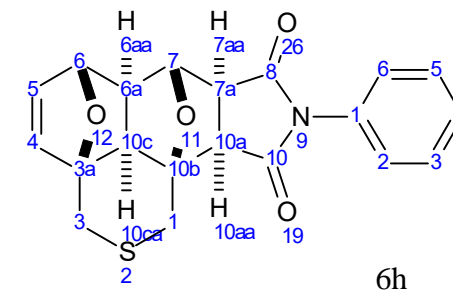

FZ4270-1.JDF

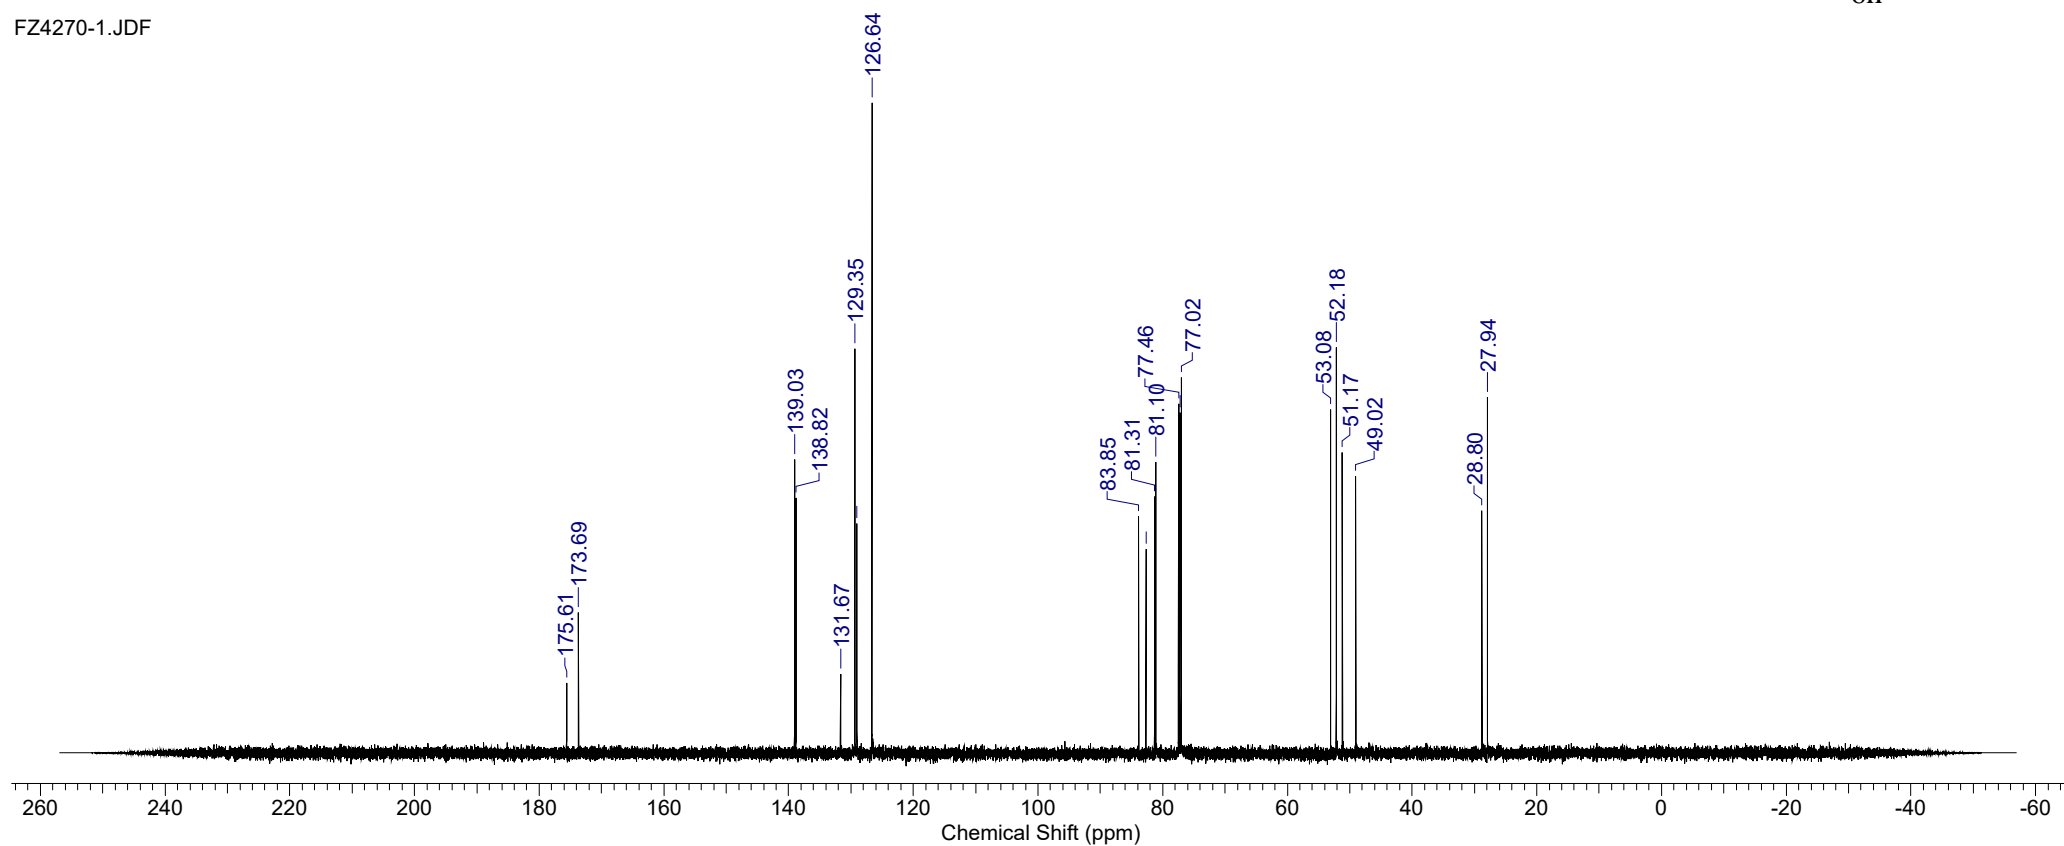

|                                                                  |                    |
|------------------------------------------------------------------|--------------------|
| <b>Formula</b> C <sub>20</sub> H <sub>17</sub> NO <sub>4</sub> S | <b>FW</b> 367.4183 |
|------------------------------------------------------------------|--------------------|

|                                        |                                                          |                                        |
|----------------------------------------|----------------------------------------------------------|----------------------------------------|
| <b>Acquisition Time (sec)</b> 0.6921   | <b>Comment</b> single pulse decoupled gated NOE          | <b>Date</b> 06 May 2015 10:46:46       |
| <b>Date Stamp</b> 06 May 2015 09:53:16 | <b>File Name</b> C:\USERS\Лабa534\DOWNLOADS\FZ4270-1.JDF |                                        |
| <b>Frequency (MHz)</b> 150.91          | <b>Nucleus</b> 13C                                       | <b>Number of Transients</b> 100        |
| <b>Original Points Count</b> 32768     | <b>Owner</b> delta                                       | <b>Points Count</b> 32768              |
| <b>Receiver Gain</b> 52.00             | <b>Solvent</b> CHLOROFORM-d                              | <b>Pulse Sequence</b> single pulse dec |
| <b>Sweep Width (Hz)</b> 47348.49       | <b>Temperature (degree C)</b> 21.000                     | <b>Spectrum Offset (Hz)</b> 15091.3428 |

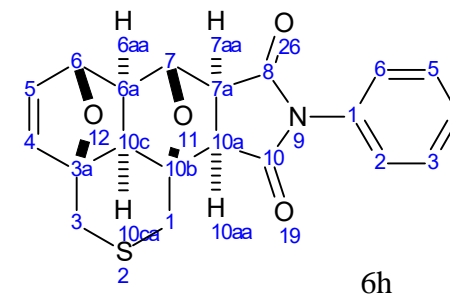

FZ4270-1.JDF

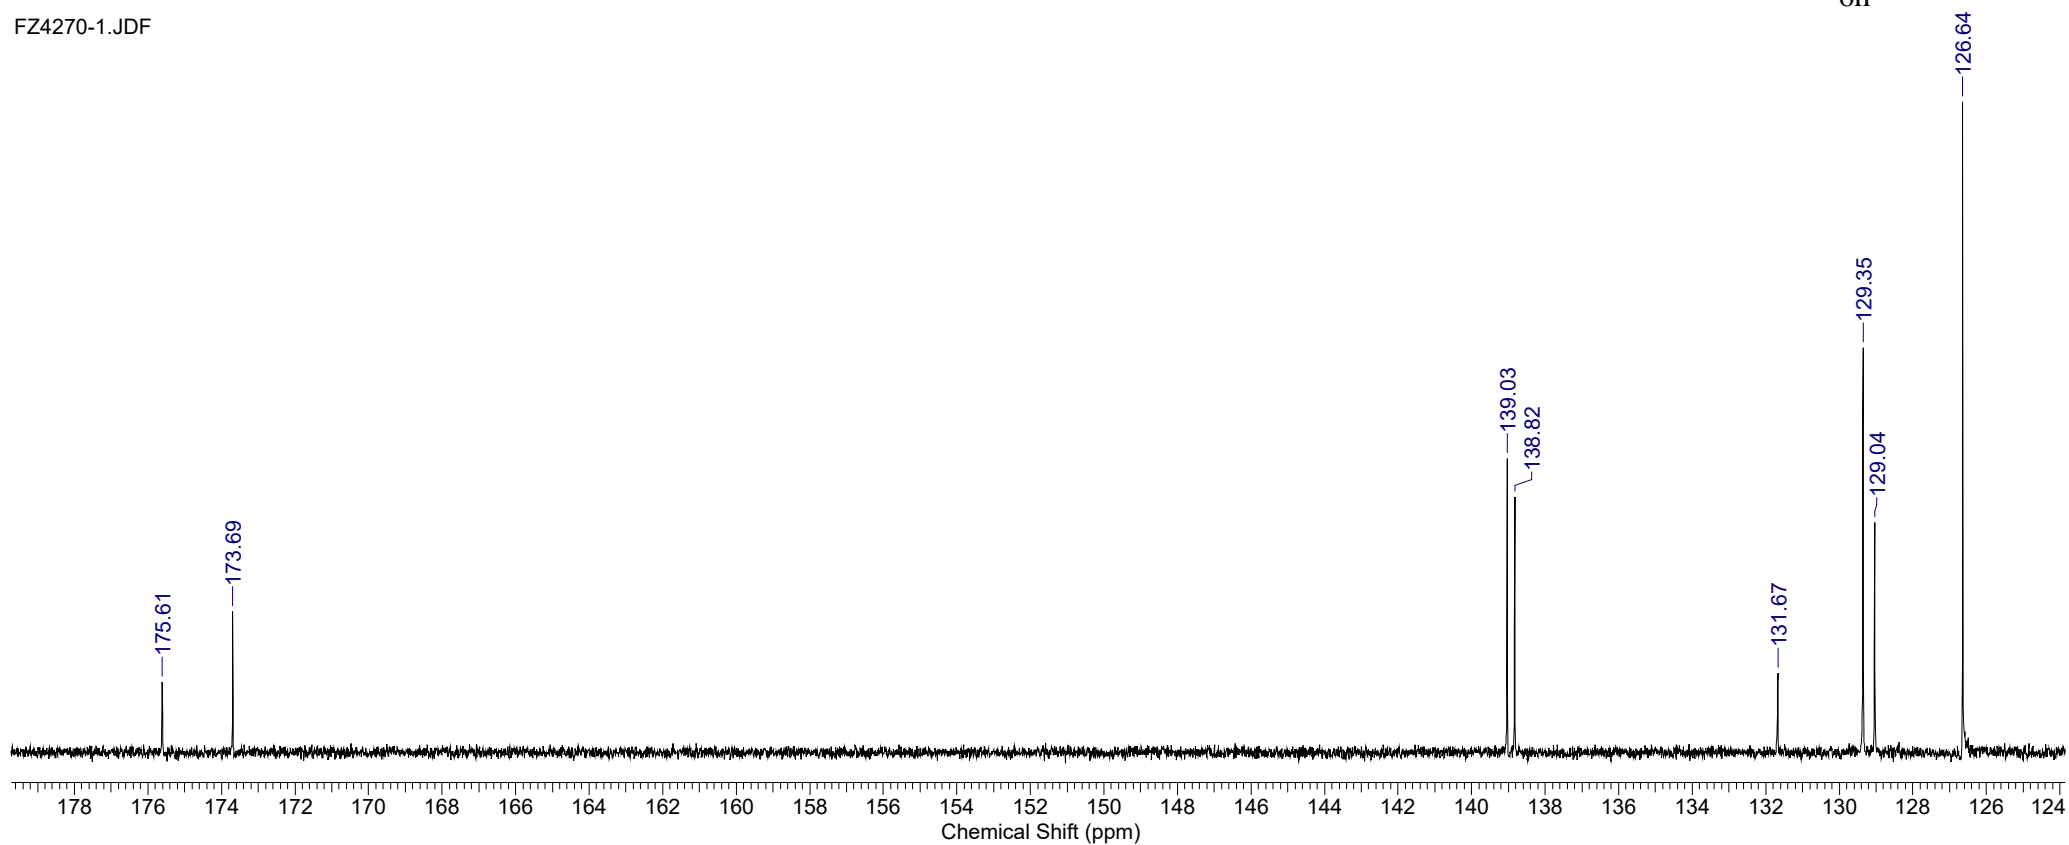

|                                                                  |                    |
|------------------------------------------------------------------|--------------------|
| <b>Formula</b> C <sub>20</sub> H <sub>17</sub> NO <sub>4</sub> S | <b>FW</b> 367.4183 |
|------------------------------------------------------------------|--------------------|

|                                        |                                                          |                                        |
|----------------------------------------|----------------------------------------------------------|----------------------------------------|
| <b>Acquisition Time (sec)</b> 0.6921   | <b>Comment</b> single pulse decoupled gated NOE          | <b>Date</b> 06 May 2015 10:46:46       |
| <b>Date Stamp</b> 06 May 2015 09:53:16 | <b>File Name</b> C:\USERS\Лабa534\DOWNLOADS\FZ4270-1.JDF |                                        |
| <b>Frequency (MHz)</b> 150.91          | <b>Nucleus</b> 13C                                       | <b>Number of Transients</b> 100        |
| <b>Original Points Count</b> 32768     | <b>Owner</b> delta                                       | <b>Points Count</b> 32768              |
| <b>Receiver Gain</b> 52.00             | <b>Solvent</b> CHLOROFORM-d                              | <b>Pulse Sequence</b> single pulse dec |
| <b>Sweep Width (Hz)</b> 47348.49       | <b>Temperature (degree C)</b> 21.000                     | <b>Spectrum Offset (Hz)</b> 15091.3428 |

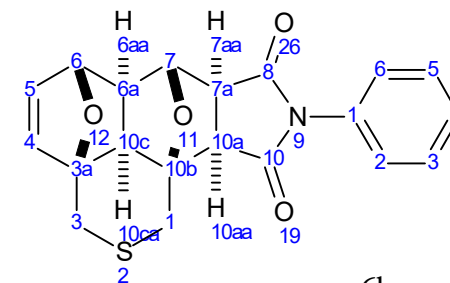

FZ4270-1.JDF

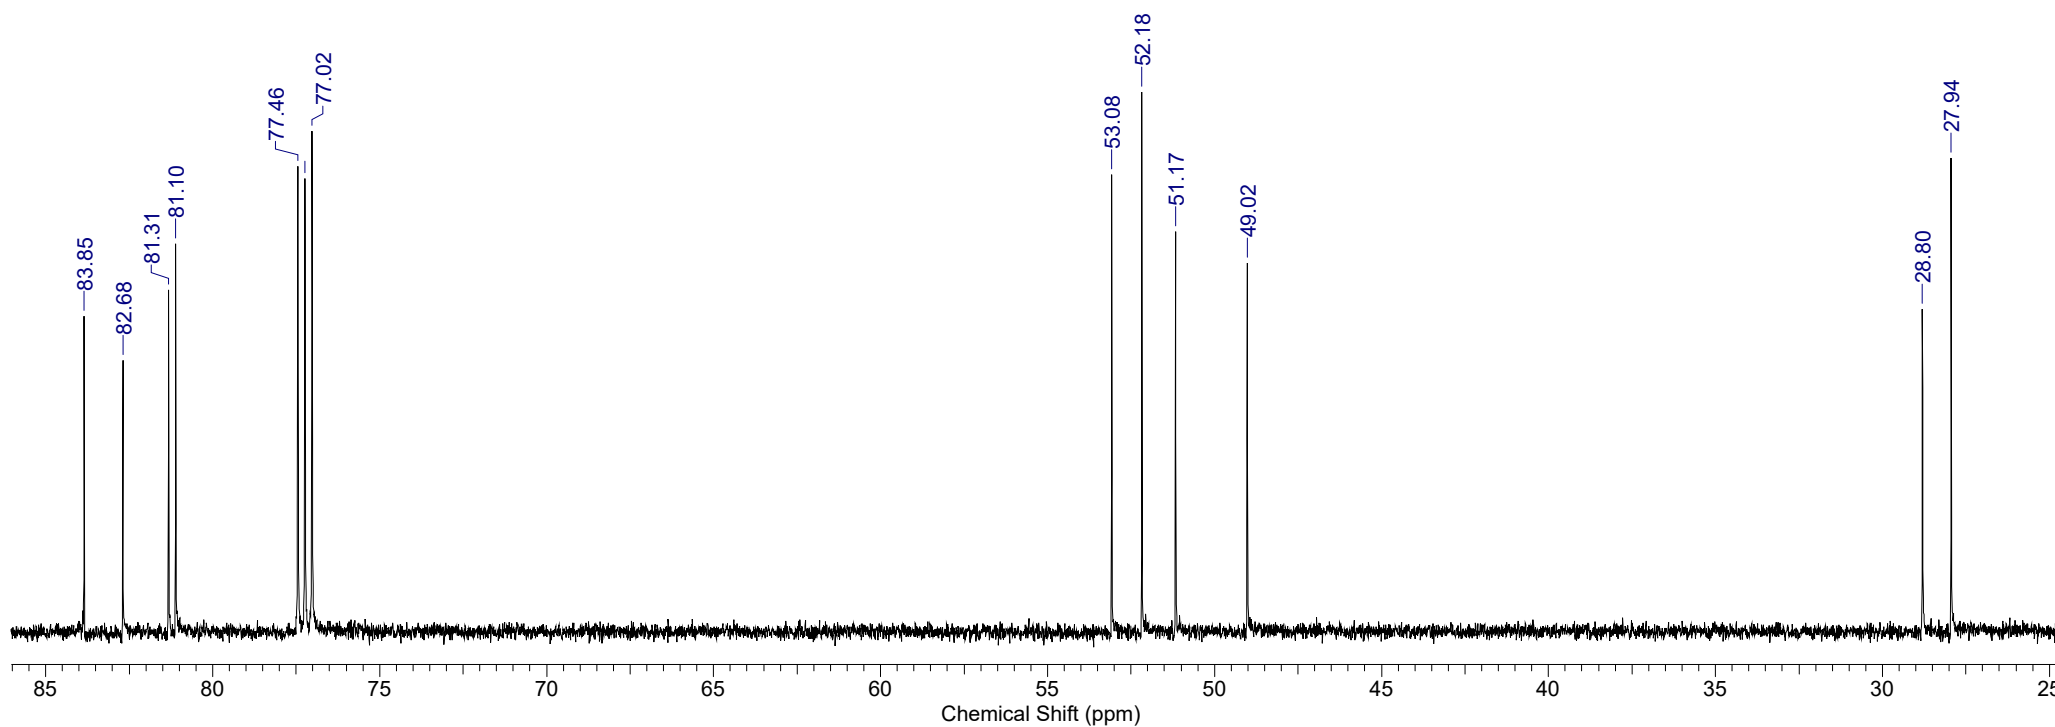

|                                                                  |                    |
|------------------------------------------------------------------|--------------------|
| <b>Formula</b> C <sub>20</sub> H <sub>17</sub> NO <sub>6</sub> S | <b>FW</b> 399.4171 |
|------------------------------------------------------------------|--------------------|

|                                                                 |                             |                                    |                                        |
|-----------------------------------------------------------------|-----------------------------|------------------------------------|----------------------------------------|
| <b>Acquisition Time (sec)</b> 1.9818                            | <b>Comment</b> single pulse | <b>Date</b> 09 Jan 1990 17:33:58   | <b>Date Stamp</b> 12 Dec 2018 13:17:34 |
| <b>File Name</b> C:\USERS\534~1\APPDATA\LOCAL\TEMP\FZ7048-1.JDF |                             | <b>Frequency (MHz)</b> 600.17      | <b>Nucleus</b> 1H                      |
| <b>Number of Transients</b> 8                                   | <b>Origin</b> ECA 600       | <b>Original Points Count</b> 32768 | <b>Owner</b> delta                     |
| <b>Pulse Sequence</b> single_pulse.ex2                          |                             | <b>Receiver Gain</b> 40.00         | <b>Points Count</b> 32768              |
| <b>Sweep Width (Hz)</b> 16534.39                                |                             | <b>Solvent</b> DMSO-d6             | <b>Spectrum Offset (Hz)</b> 5423.2422  |

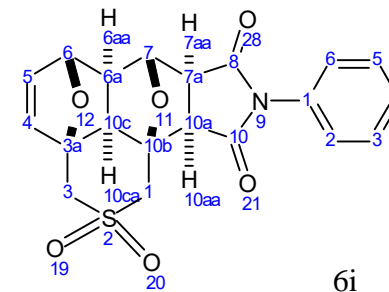

FZ7048-1.JDF

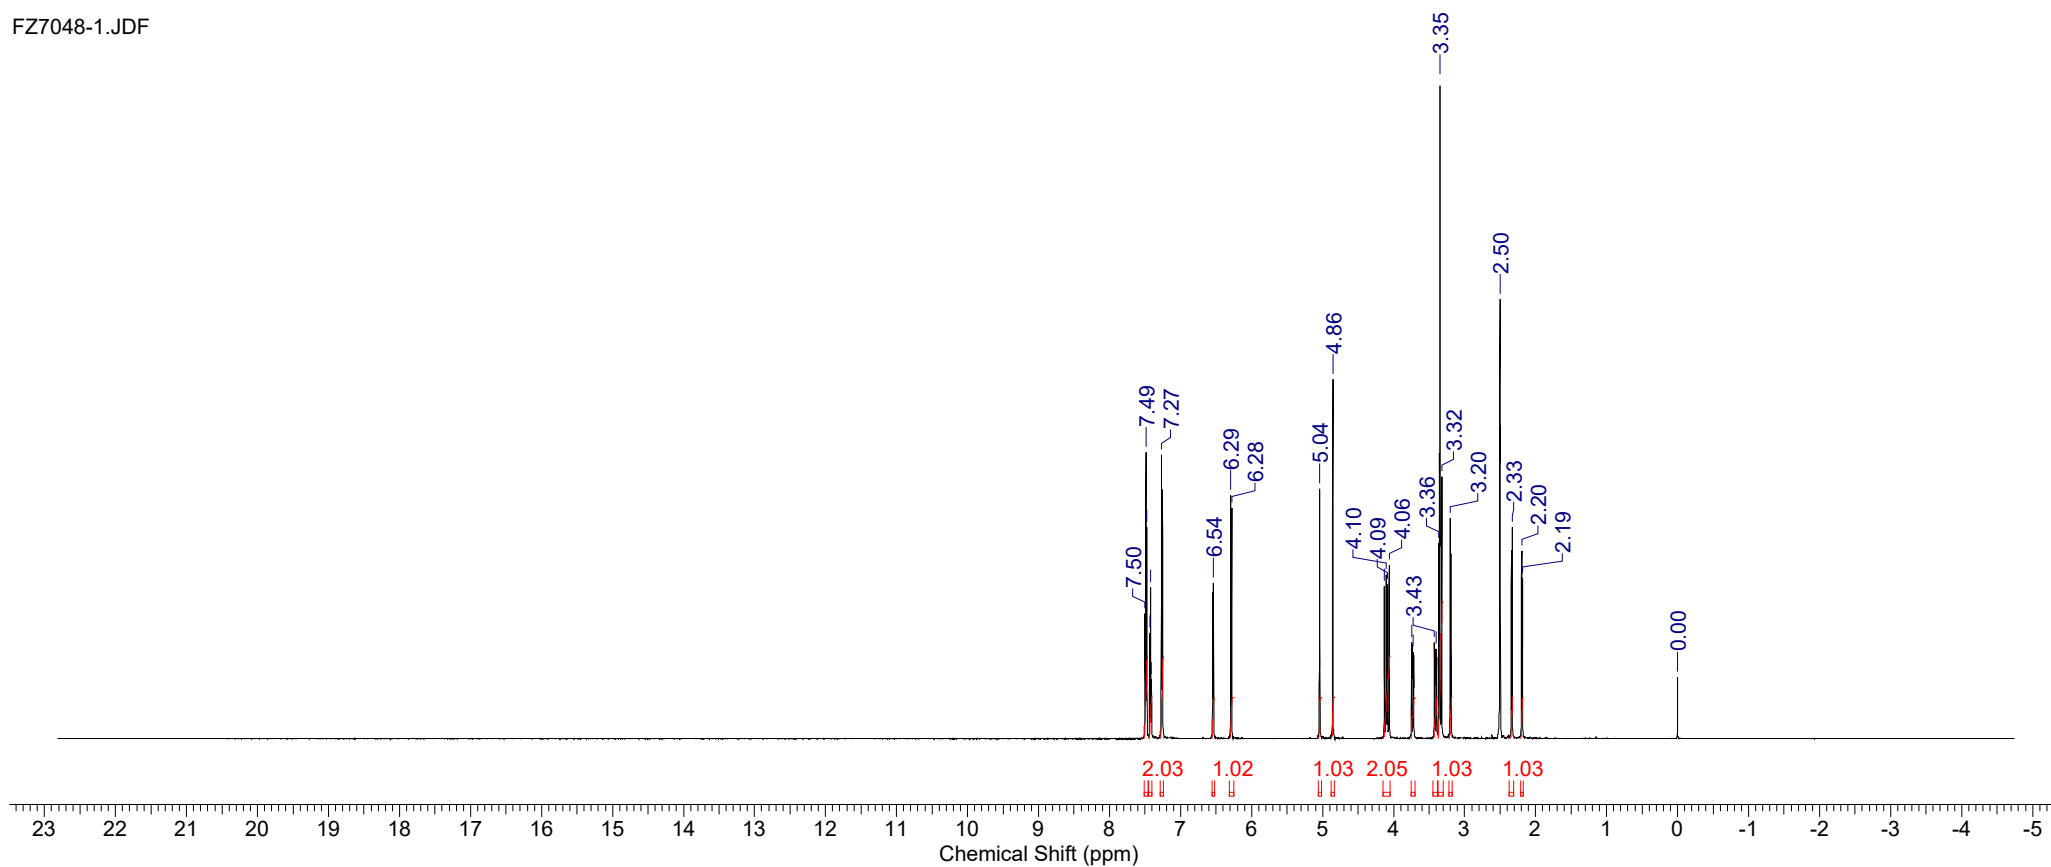

|                                                                  |                    |
|------------------------------------------------------------------|--------------------|
| <b>Formula</b> C <sub>20</sub> H <sub>17</sub> NO <sub>6</sub> S | <b>FW</b> 399.4171 |
|------------------------------------------------------------------|--------------------|

|                                                                 |                             |                                    |                                        |
|-----------------------------------------------------------------|-----------------------------|------------------------------------|----------------------------------------|
| <b>Acquisition Time (sec)</b> 1.9818                            | <b>Comment</b> single pulse | <b>Date</b> 09 Jan 1990 17:33:58   | <b>Date Stamp</b> 12 Dec 2018 13:17:34 |
| <b>File Name</b> C:\USERS\534~1\APPDATA\LOCAL\TEMP\FZ7048-1.JDF |                             | <b>Frequency (MHz)</b> 600.17      | <b>Nucleus</b> 1H                      |
| <b>Number of Transients</b> 8                                   | <b>Origin</b> ECA 600       | <b>Original Points Count</b> 32768 | <b>Points Count</b> 32768              |
| <b>Pulse Sequence</b> single_pulse.ex2                          | <b>Receiver Gain</b> 40.00  | <b>Solvent</b> DMSO-d6             | <b>Spectrum Offset (Hz)</b> 5423.2422  |
| <b>Sweep Width (Hz)</b> 16534.39                                |                             |                                    |                                        |

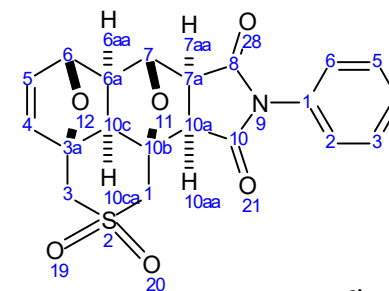

6i

FZ7048-1.JDF

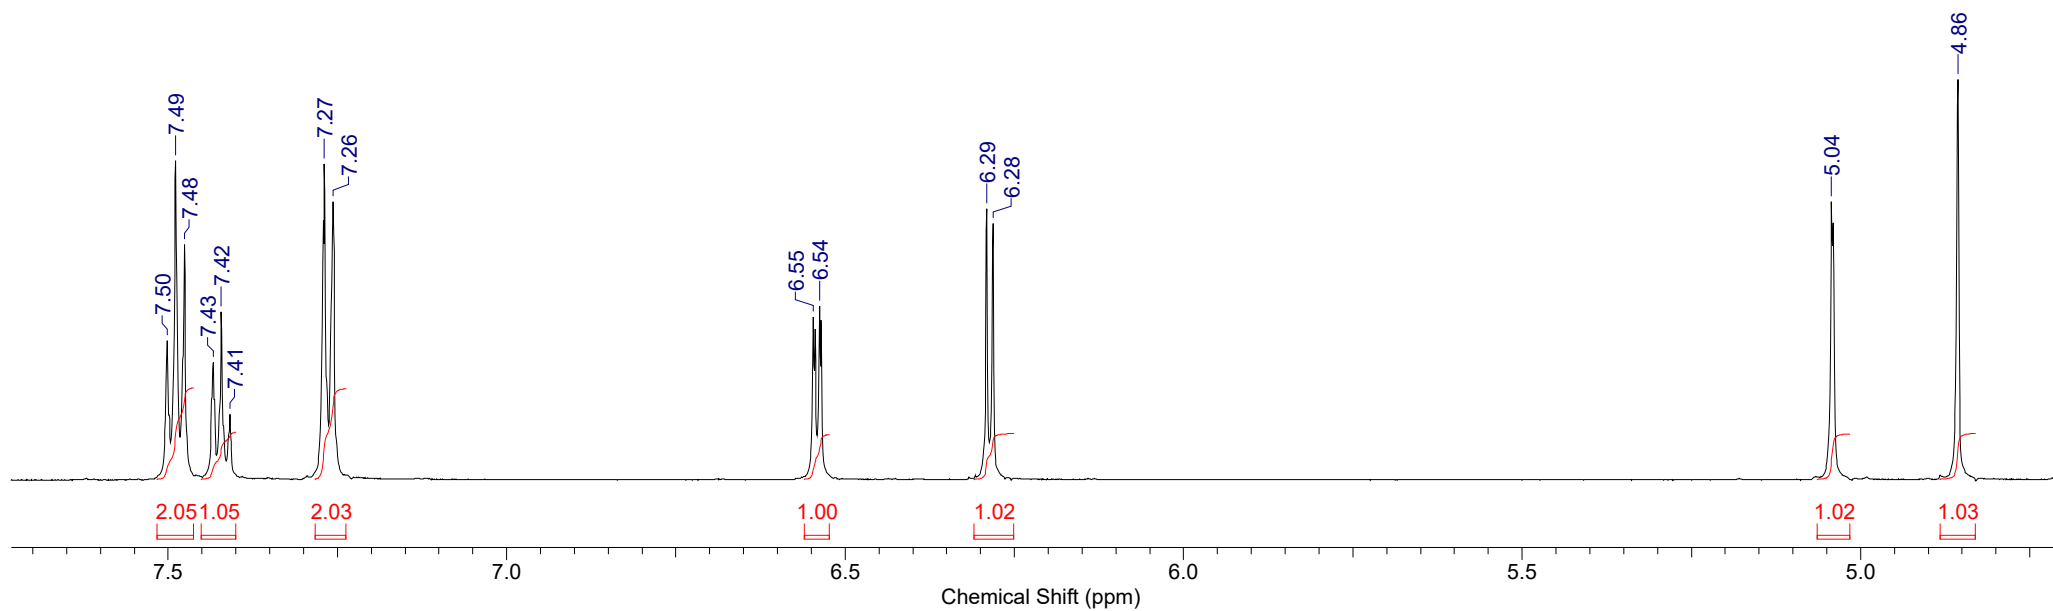

Formula  $C_{20}H_{17}NO_6S$  FW 399.4171

|                        |                                                |                      |              |                       |                      |              |                      |
|------------------------|------------------------------------------------|----------------------|--------------|-----------------------|----------------------|--------------|----------------------|
| Acquisition Time (sec) | 1.9818                                         | Comment              | single pulse | Date                  | 09 Jan 1990 17:33:58 | Date Stamp   | 12 Dec 2018 13:17:34 |
| File Name              | C:\USERS\534~1\APPDATA\LOCAL\TEMP\FZ7048-1.JDF |                      |              | Frequency (MHz)       | 600.17               | Nucleus      | $^1H$                |
| Number of Transients   | 8                                              | Origin               | ECA 600      | Original Points Count | 32768                | Owner        | delta                |
| Pulse Sequence         | single_pulse.ex2                               | Receiver Gain        | 40.00        | Solvent               | DMSO-d6              | Points Count | 32768                |
| Sweep Width (Hz)       | 16534.39                                       | Spectrum Offset (Hz) | 5423.2422    |                       |                      |              |                      |

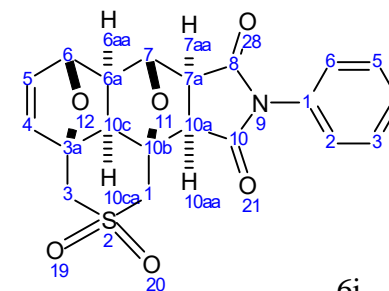

FZ7048-1.JDF

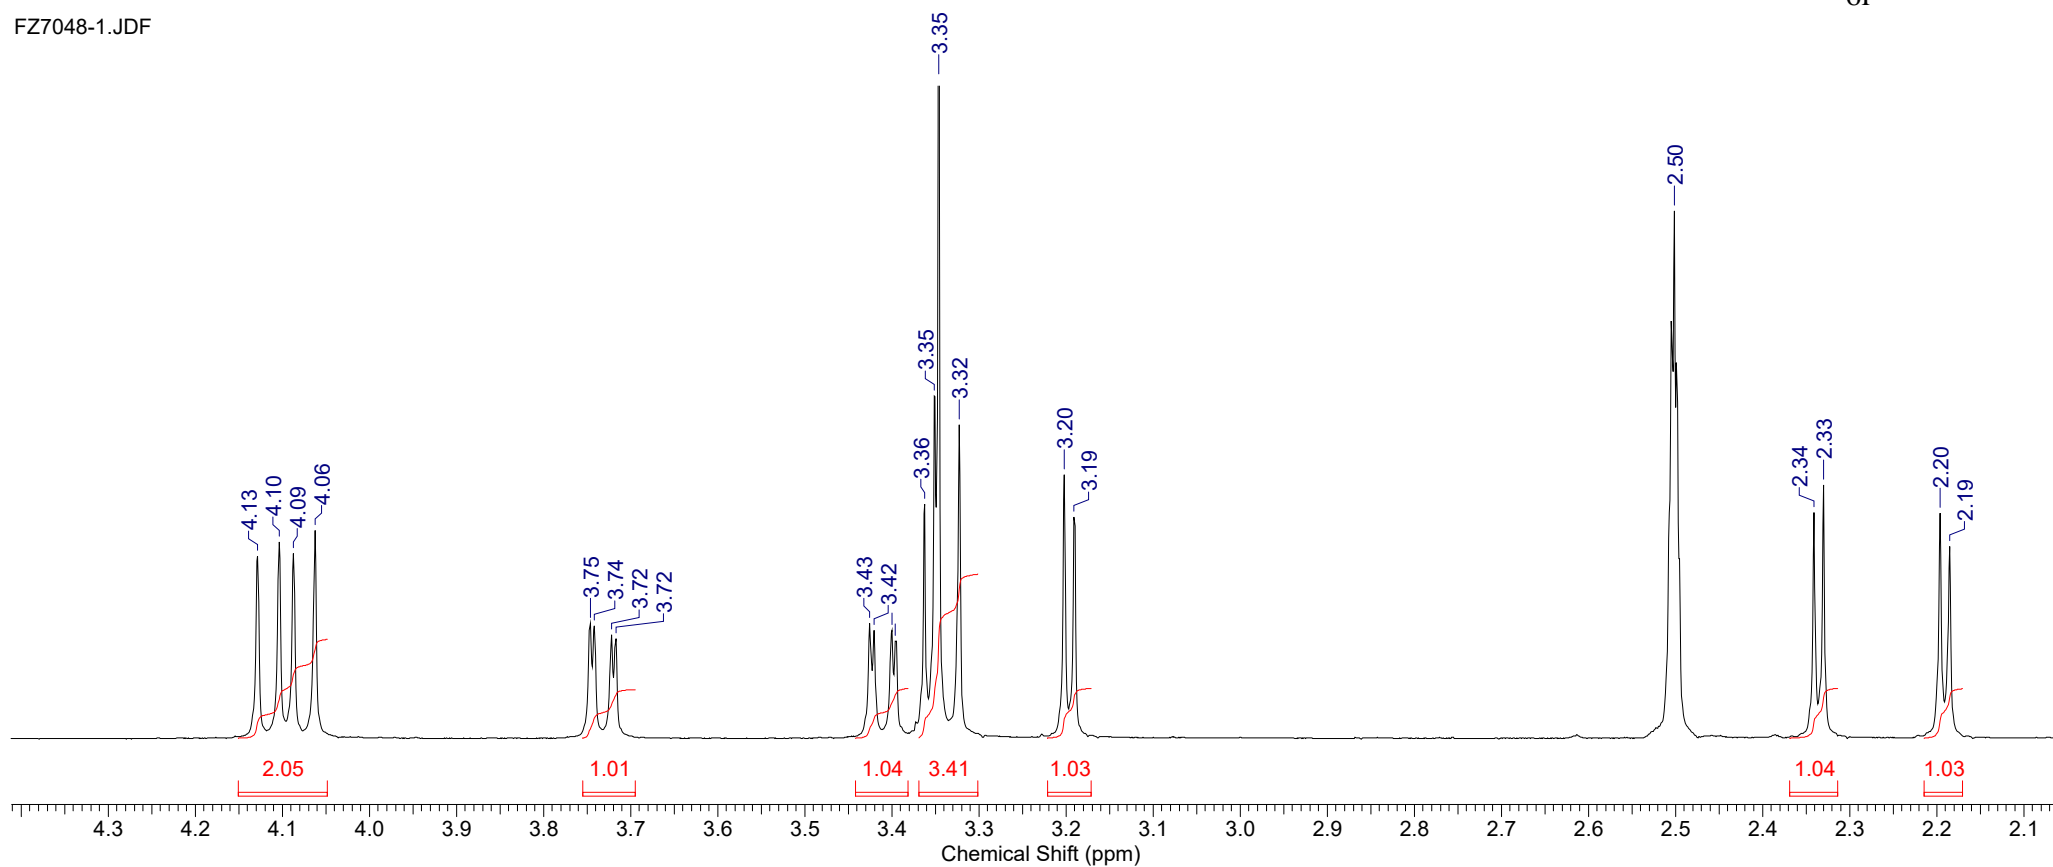



|                                                                  |                    |
|------------------------------------------------------------------|--------------------|
| <b>Formula</b> C <sub>20</sub> H <sub>17</sub> NO <sub>6</sub> S | <b>FW</b> 399.4171 |
|------------------------------------------------------------------|--------------------|

|                                        |                                                           |                                    |
|----------------------------------------|-----------------------------------------------------------|------------------------------------|
| <b>Acquisition Time (sec)</b> 0.6921   | <b>Comment</b> single pulse decoupled gated NOE           | <b>Date</b> 13 Feb 1990 15:34:08   |
| <b>Date Stamp</b> 16 Jan 2019 11:17:13 | <b>File Name</b> C:\USERS\Jla6a534\DOWNLOADS\FZ7109-1.JDF | <b>Frequency (MHz)</b> 150.91      |
| <b>Nucleus</b> 13C                     | <b>Number of Transients</b> 301                           | <b>Origin</b> ECA 600              |
| <b>Points Count</b> 32768              | <b>Pulse Sequence</b> single pulse dec                    | <b>Original Points Count</b> 32768 |
| <b>Spectrum Offset (Hz)</b> 15091.3428 | <b>Sweep Width (Hz)</b> 47348.49                          | <b>Receiver Gain</b> 56.00         |
|                                        |                                                           | <b>Owner</b> delta                 |
|                                        |                                                           | <b>Solvent</b> DMSO-d6             |

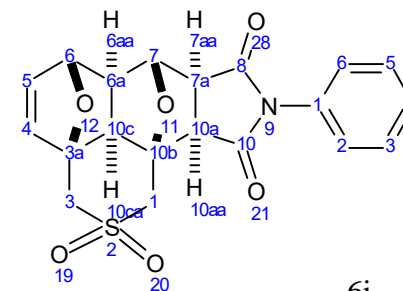

6i

FZ7109-1.JDF

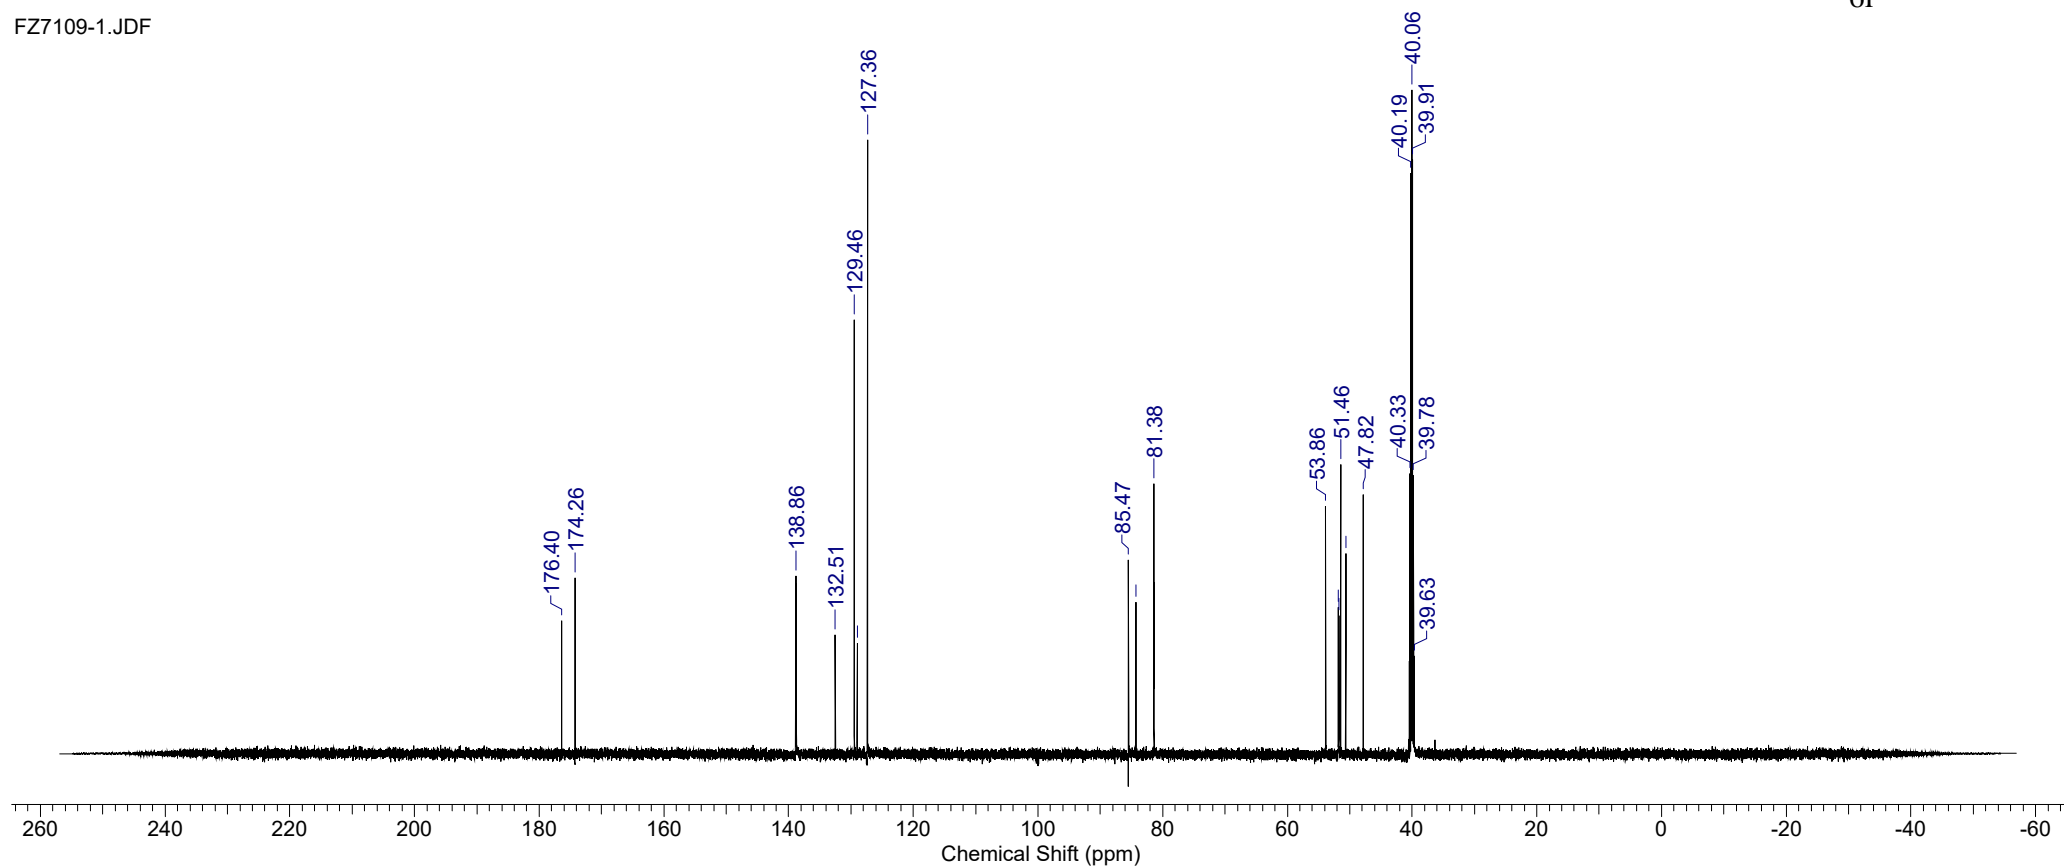

Formula C<sub>20</sub>H<sub>17</sub>NO<sub>6</sub>S FW 399.4171

|                        |                      |                      |                                          |                       |                      |
|------------------------|----------------------|----------------------|------------------------------------------|-----------------------|----------------------|
| Acquisition Time (sec) | 0.6921               | Comment              | single pulse decoupled gated NOE         | Date                  | 13 Feb 1990 15:34:08 |
| Date Stamp             | 16 Jan 2019 11:17:13 | File Name            | C:\USERS\Jla6a534\DOWNLOADS\FZ7109-1.JDF | Frequency (MHz)       | 150.91               |
| Nucleus                | 13C                  | Number of Transients | 301                                      | Origin                | ECA 600              |
| Points Count           | 32768                | Pulse Sequence       | single pulse dec                         | Original Points Count | 32768                |
| Spectrum Offset (Hz)   | 15091.3428           | Sweep Width (Hz)     | 47348.49                                 | Receiver Gain         | 56.00                |
|                        |                      |                      |                                          | Solvent               | DMSO-d6              |

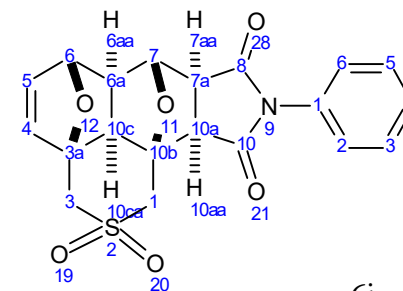

6i

FZ7109-1.JDF

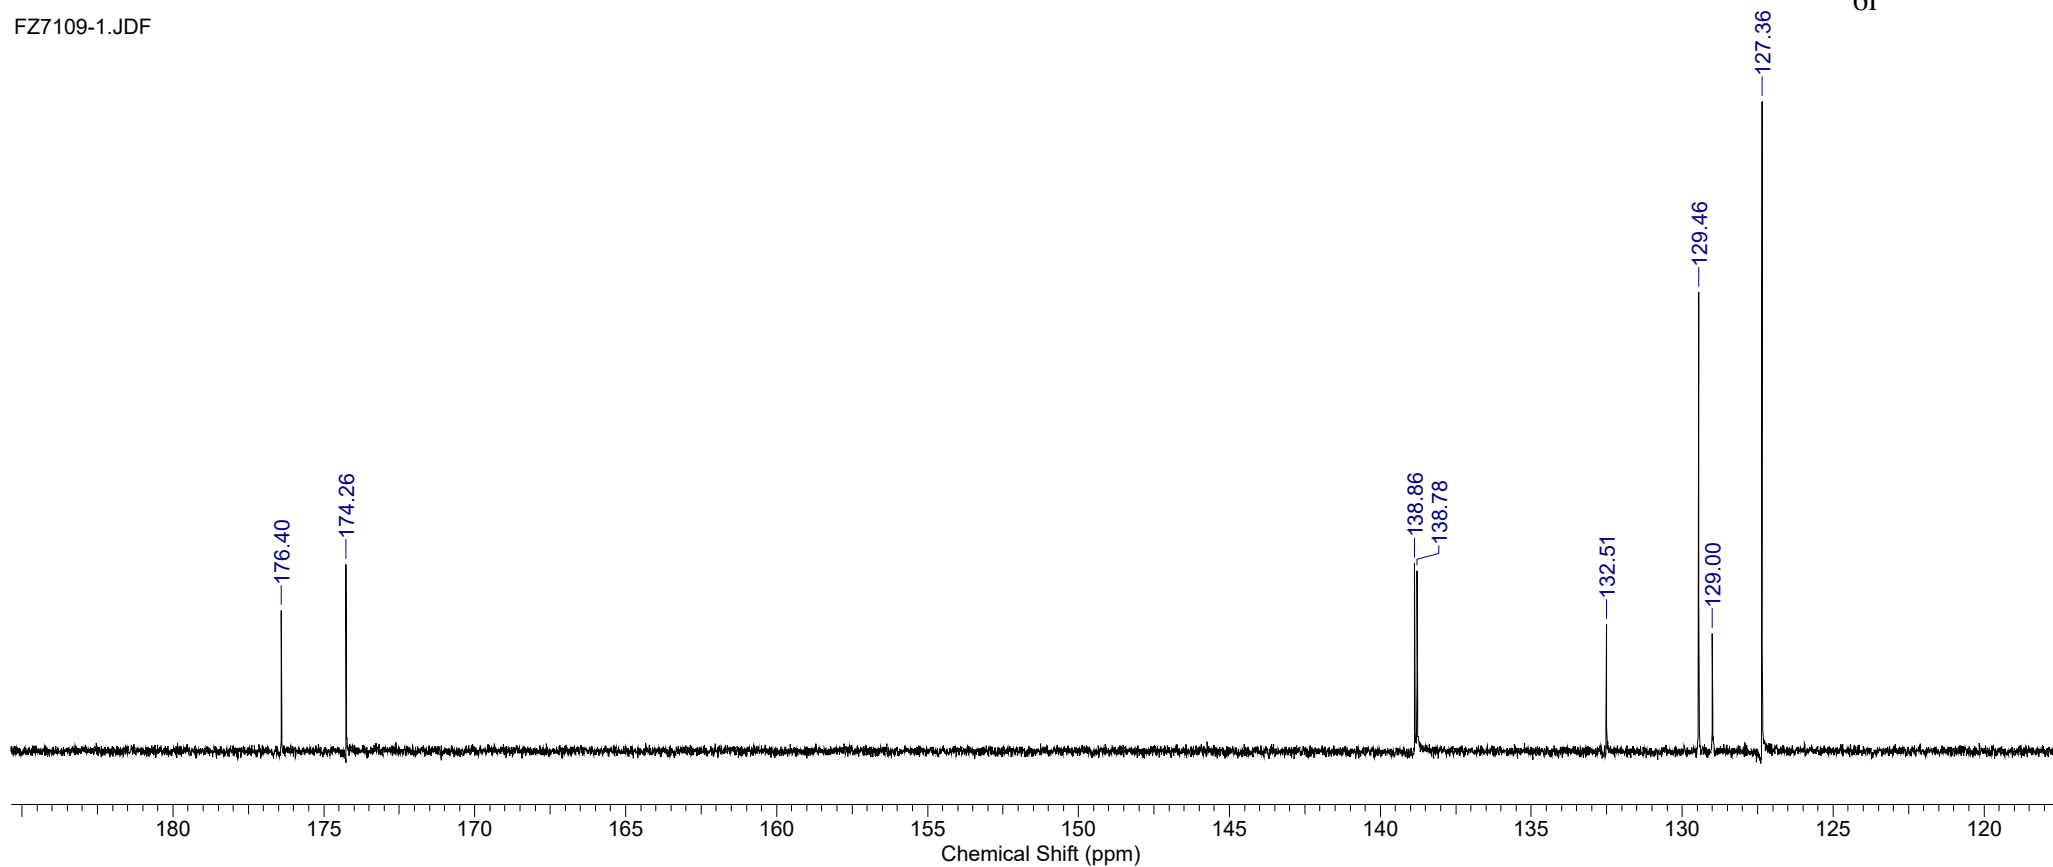

|                                                                  |                    |
|------------------------------------------------------------------|--------------------|
| <b>Formula</b> C <sub>20</sub> H <sub>17</sub> NO <sub>6</sub> S | <b>FW</b> 399.4171 |
|------------------------------------------------------------------|--------------------|

|                                        |                                                           |                                    |
|----------------------------------------|-----------------------------------------------------------|------------------------------------|
| <b>Acquisition Time (sec)</b> 0.6921   | <b>Comment</b> single pulse decoupled gated NOE           | <b>Date</b> 13 Feb 1990 15:34:08   |
| <b>Date Stamp</b> 16 Jan 2019 11:17:13 | <b>File Name</b> C:\USERS\Jla6a534\DOWNLOADS\FZ7109-1.JDF | <b>Frequency (MHz)</b> 150.91      |
| <b>Nucleus</b> 13C                     | <b>Number of Transients</b> 301                           | <b>Origin</b> ECA 600              |
| <b>Points Count</b> 32768              | <b>Pulse Sequence</b> single pulse dec                    | <b>Original Points Count</b> 32768 |
| <b>Spectrum Offset (Hz)</b> 15091.3428 | <b>Sweep Width (Hz)</b> 47348.49                          | <b>Receiver Gain</b> 56.00         |
|                                        |                                                           | <b>Owner</b> delta                 |
|                                        |                                                           | <b>Solvent</b> DMSO-d6             |

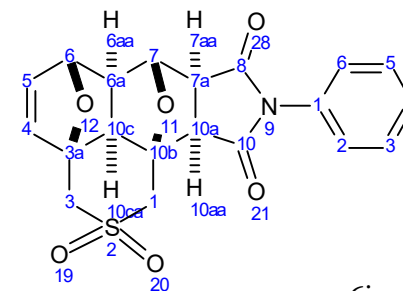

6i

FZ7109-1.JDF

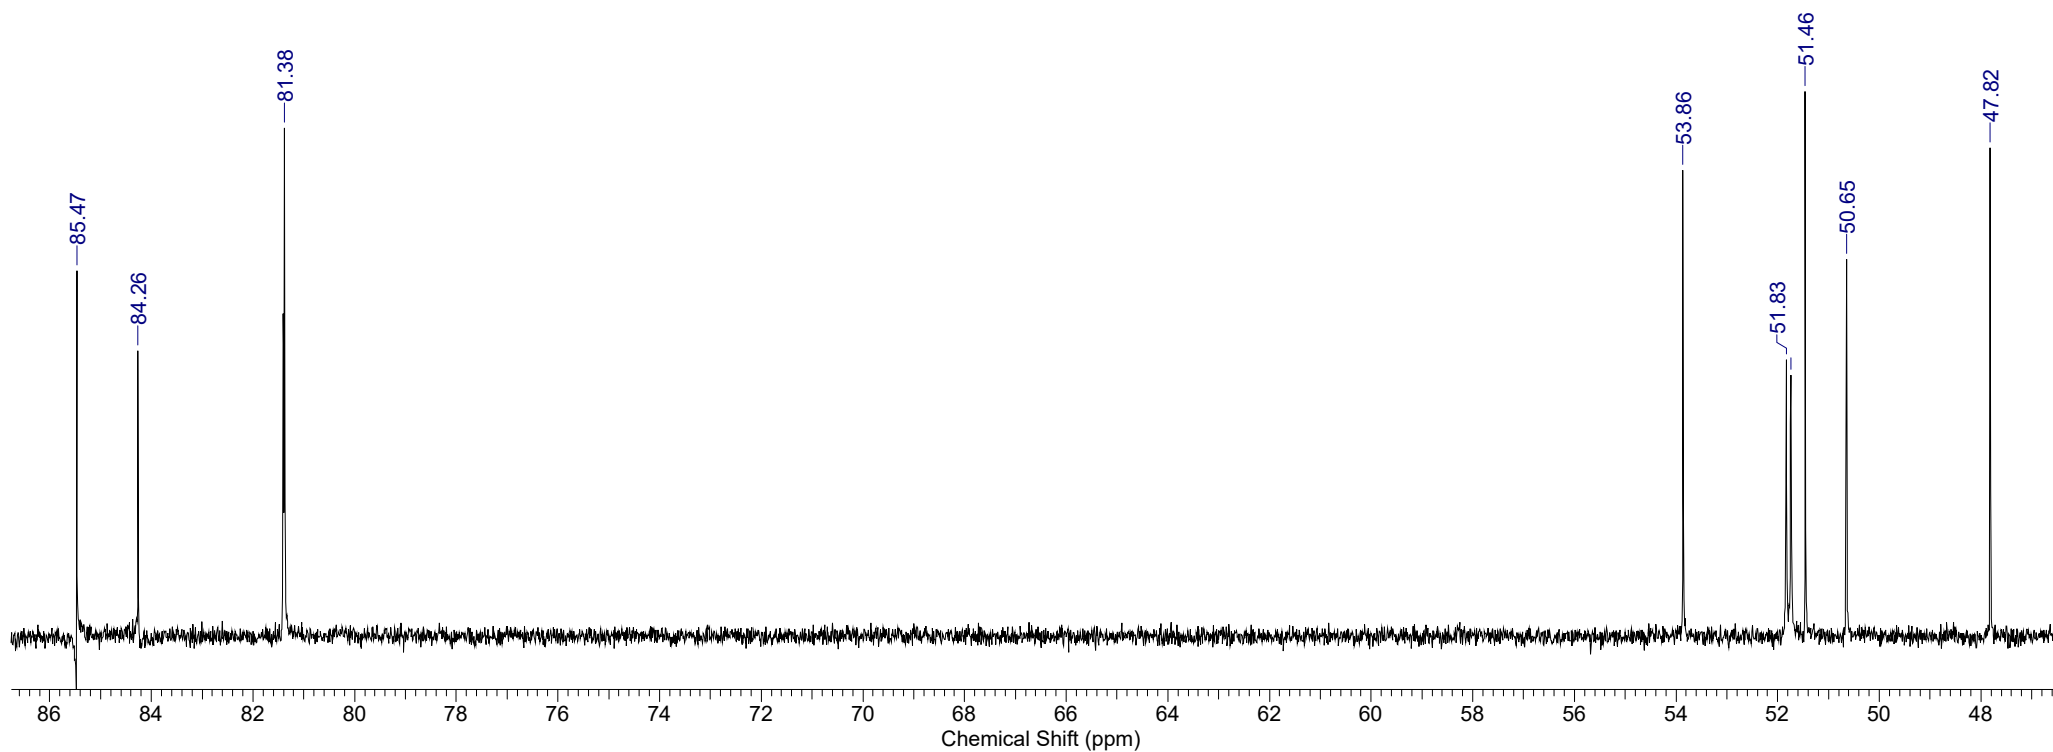

|                               |                           |                              |              |                             |                      |                             |                      |
|-------------------------------|---------------------------|------------------------------|--------------|-----------------------------|----------------------|-----------------------------|----------------------|
| <b>Acquisition Time (sec)</b> | 1.9818                    | <b>Comment</b>               | single_pulse | <b>Date</b>                 | 10 Dec 2020 11:52:23 | <b>Date Stamp</b>           | 10 Dec 2020 11:05:30 |
| <b>File Name</b>              | H:\DOWNLOADS\FZ9360-1.JDF | <b>Frequency (MHz)</b>       | 600.17       | <b>Nucleus</b>              | 1H                   | <b>Number of Transients</b> | 8                    |
| <b>Origin</b>                 | ECA 600                   | <b>Original Points Count</b> | 32768        | <b>Owner</b>                | CKP                  | <b>Points Count</b>         | 32768                |
| <b>Receiver Gain</b>          | 46.00                     | <b>Solvent</b>               | DMSO-d6      | <b>Spectrum Offset (Hz)</b> | 5423.7471            | <b>Sweep Width (Hz)</b>     | 16534.39             |

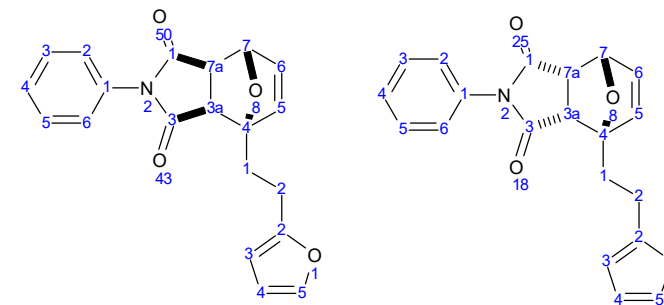

8a

FZ9360-1.ESP

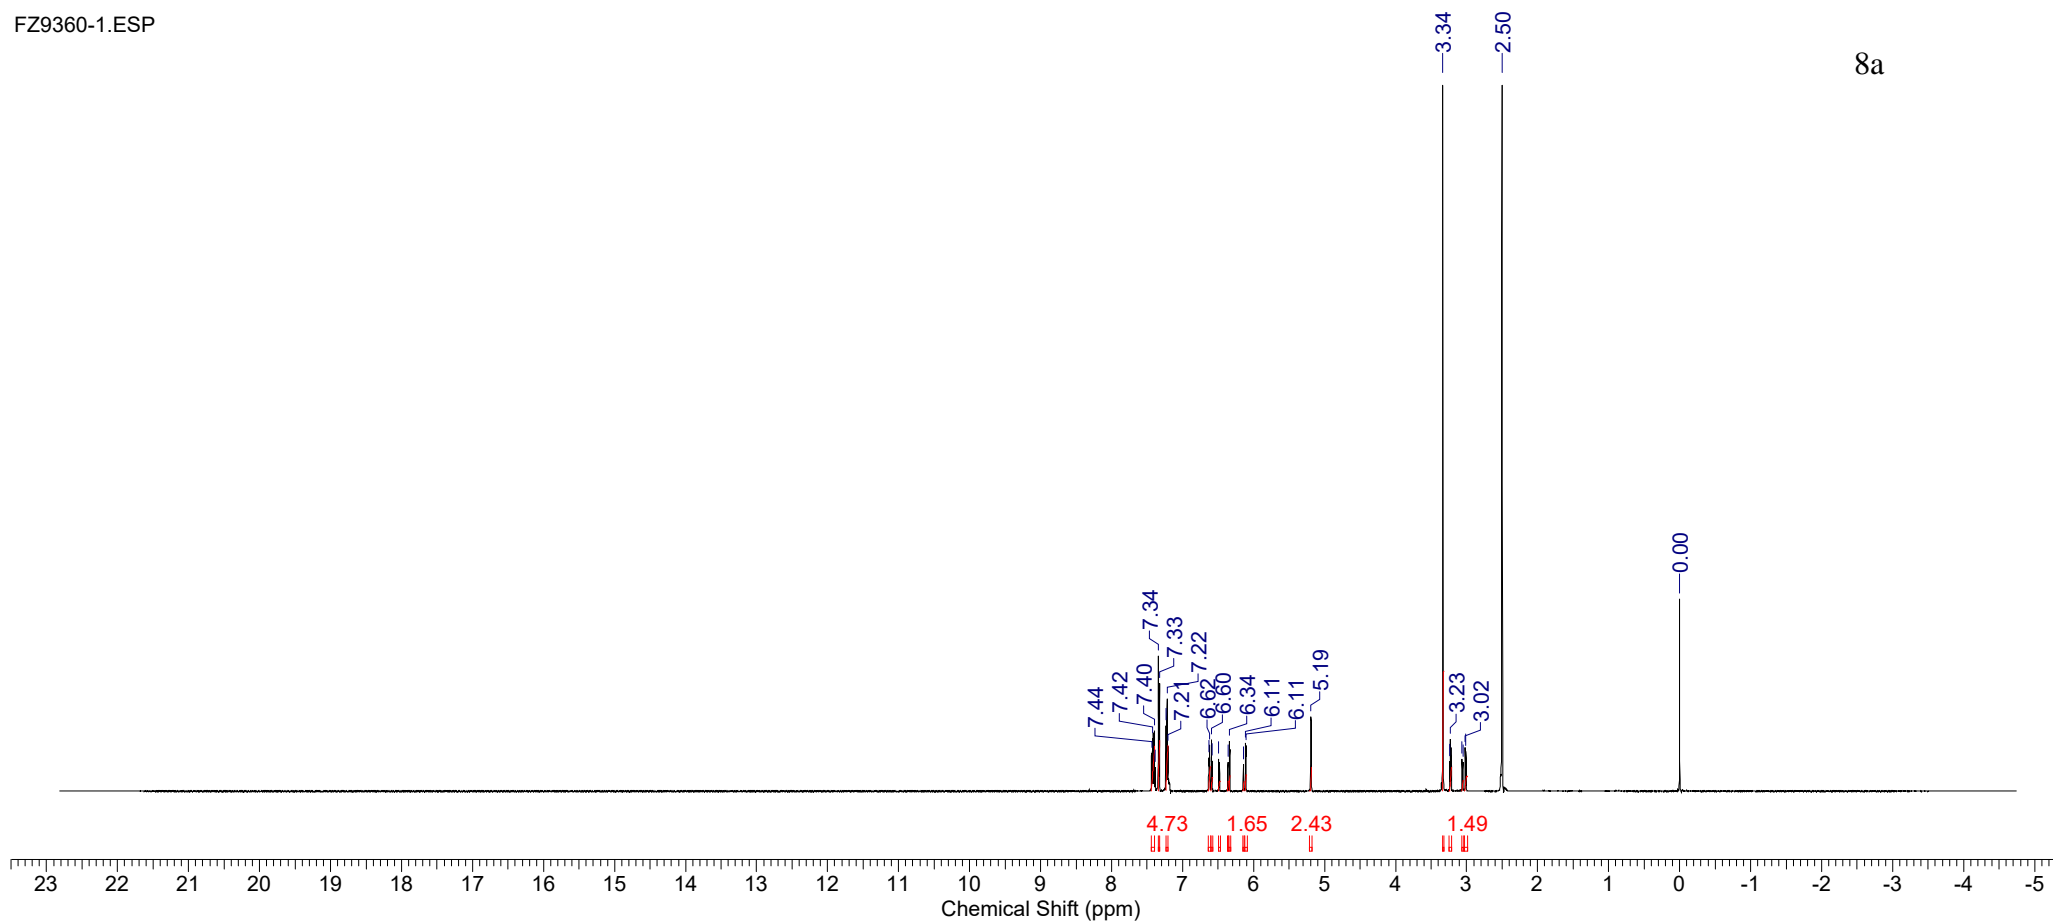

|                               |                           |                              |              |                             |                      |                             |                      |
|-------------------------------|---------------------------|------------------------------|--------------|-----------------------------|----------------------|-----------------------------|----------------------|
| <b>Acquisition Time (sec)</b> | 1.9818                    | <b>Comment</b>               | single_pulse | <b>Date</b>                 | 10 Dec 2020 11:52:23 | <b>Date Stamp</b>           | 10 Dec 2020 11:05:30 |
| <b>File Name</b>              | H:\DOWNLOADS\FZ9360-1.JDF | <b>Frequency (MHz)</b>       | 600.17       | <b>Nucleus</b>              | 1H                   | <b>Number of Transients</b> | 8                    |
| <b>Origin</b>                 | ECA 600                   | <b>Original Points Count</b> | 32768        | <b>Owner</b>                | CKP                  | <b>Points Count</b>         | 32768                |
| <b>Receiver Gain</b>          | 46.00                     | <b>Solvent</b>               | DMSO-d6      | <b>Spectrum Offset (Hz)</b> | 5423.7471            | <b>Sweep Width (Hz)</b>     | 16534.39             |



8a

FZ9360-1.ESP

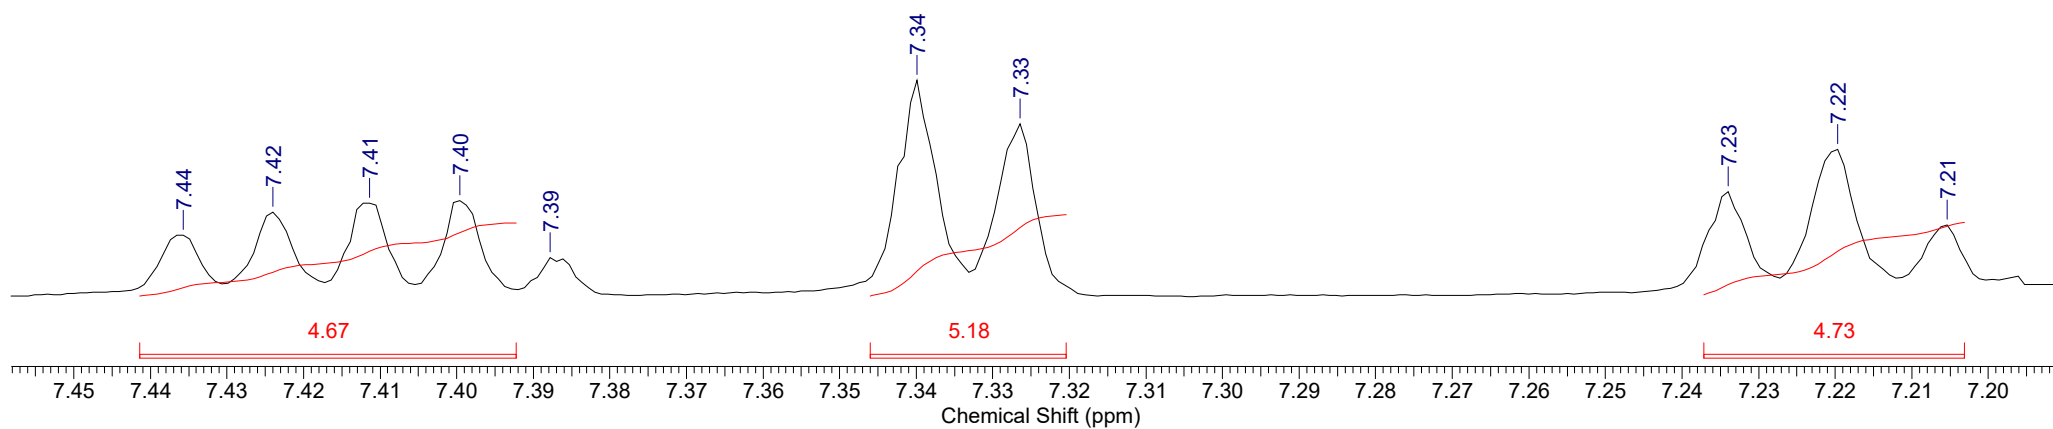

|                               |                           |                              |              |                             |                      |                             |                      |
|-------------------------------|---------------------------|------------------------------|--------------|-----------------------------|----------------------|-----------------------------|----------------------|
| <b>Acquisition Time (sec)</b> | 1.9818                    | <b>Comment</b>               | single_pulse | <b>Date</b>                 | 10 Dec 2020 11:52:23 | <b>Date Stamp</b>           | 10 Dec 2020 11:05:30 |
| <b>File Name</b>              | H:\DOWNLOADS\FZ9360-1.JDF | <b>Frequency (MHz)</b>       | 600.17       | <b>Nucleus</b>              | 1H                   | <b>Number of Transients</b> | 8                    |
| <b>Origin</b>                 | ECA 600                   | <b>Original Points Count</b> | 32768        | <b>Owner</b>                | CKP                  | <b>Points Count</b>         | 32768                |
| <b>Receiver Gain</b>          | 46.00                     | <b>Solvent</b>               | DMSO-d6      | <b>Spectrum Offset (Hz)</b> | 5423.7471            | <b>Sweep Width (Hz)</b>     | 16534.39             |



8a

FZ9360-1.ESP

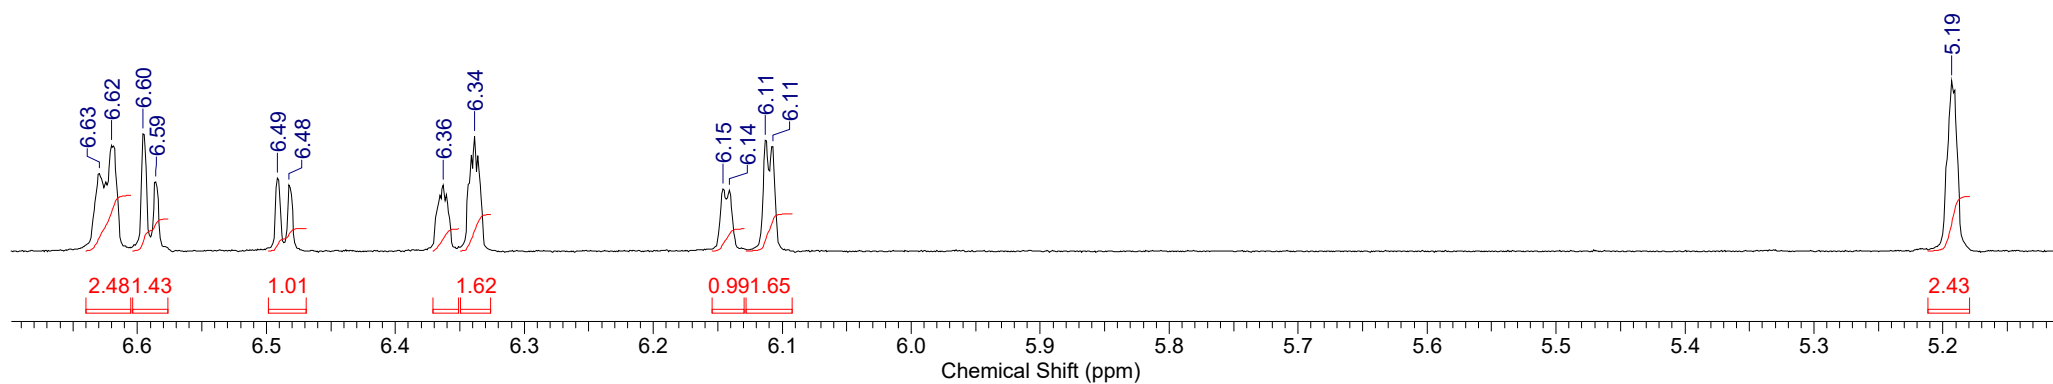

|                               |                           |                              |              |                             |                      |                             |                      |
|-------------------------------|---------------------------|------------------------------|--------------|-----------------------------|----------------------|-----------------------------|----------------------|
| <b>Acquisition Time (sec)</b> | 1.9818                    | <b>Comment</b>               | single_pulse | <b>Date</b>                 | 10 Dec 2020 11:52:23 | <b>Date Stamp</b>           | 10 Dec 2020 11:05:30 |
| <b>File Name</b>              | H:\DOWNLOADS\FZ9360-1.JDF | <b>Frequency (MHz)</b>       | 600.17       | <b>Nucleus</b>              | 1H                   | <b>Number of Transients</b> | 8                    |
| <b>Origin</b>                 | ECA 600                   | <b>Original Points Count</b> | 32768        | <b>Owner</b>                | CKP                  | <b>Points Count</b>         | 32768                |
| <b>Receiver Gain</b>          | 46.00                     | <b>Solvent</b>               | DMSO-d6      | <b>Spectrum Offset (Hz)</b> | 5423.7471            | <b>Sweep Width (Hz)</b>     | 16534.39             |

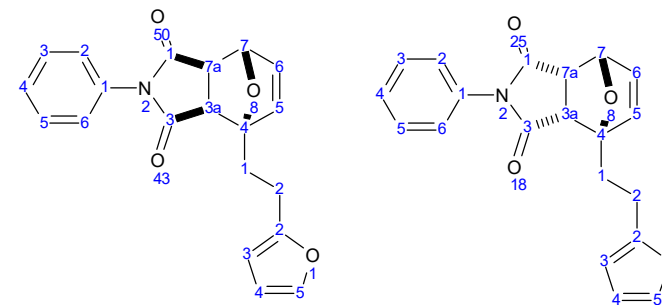

8a

FZ9360-1.ESP

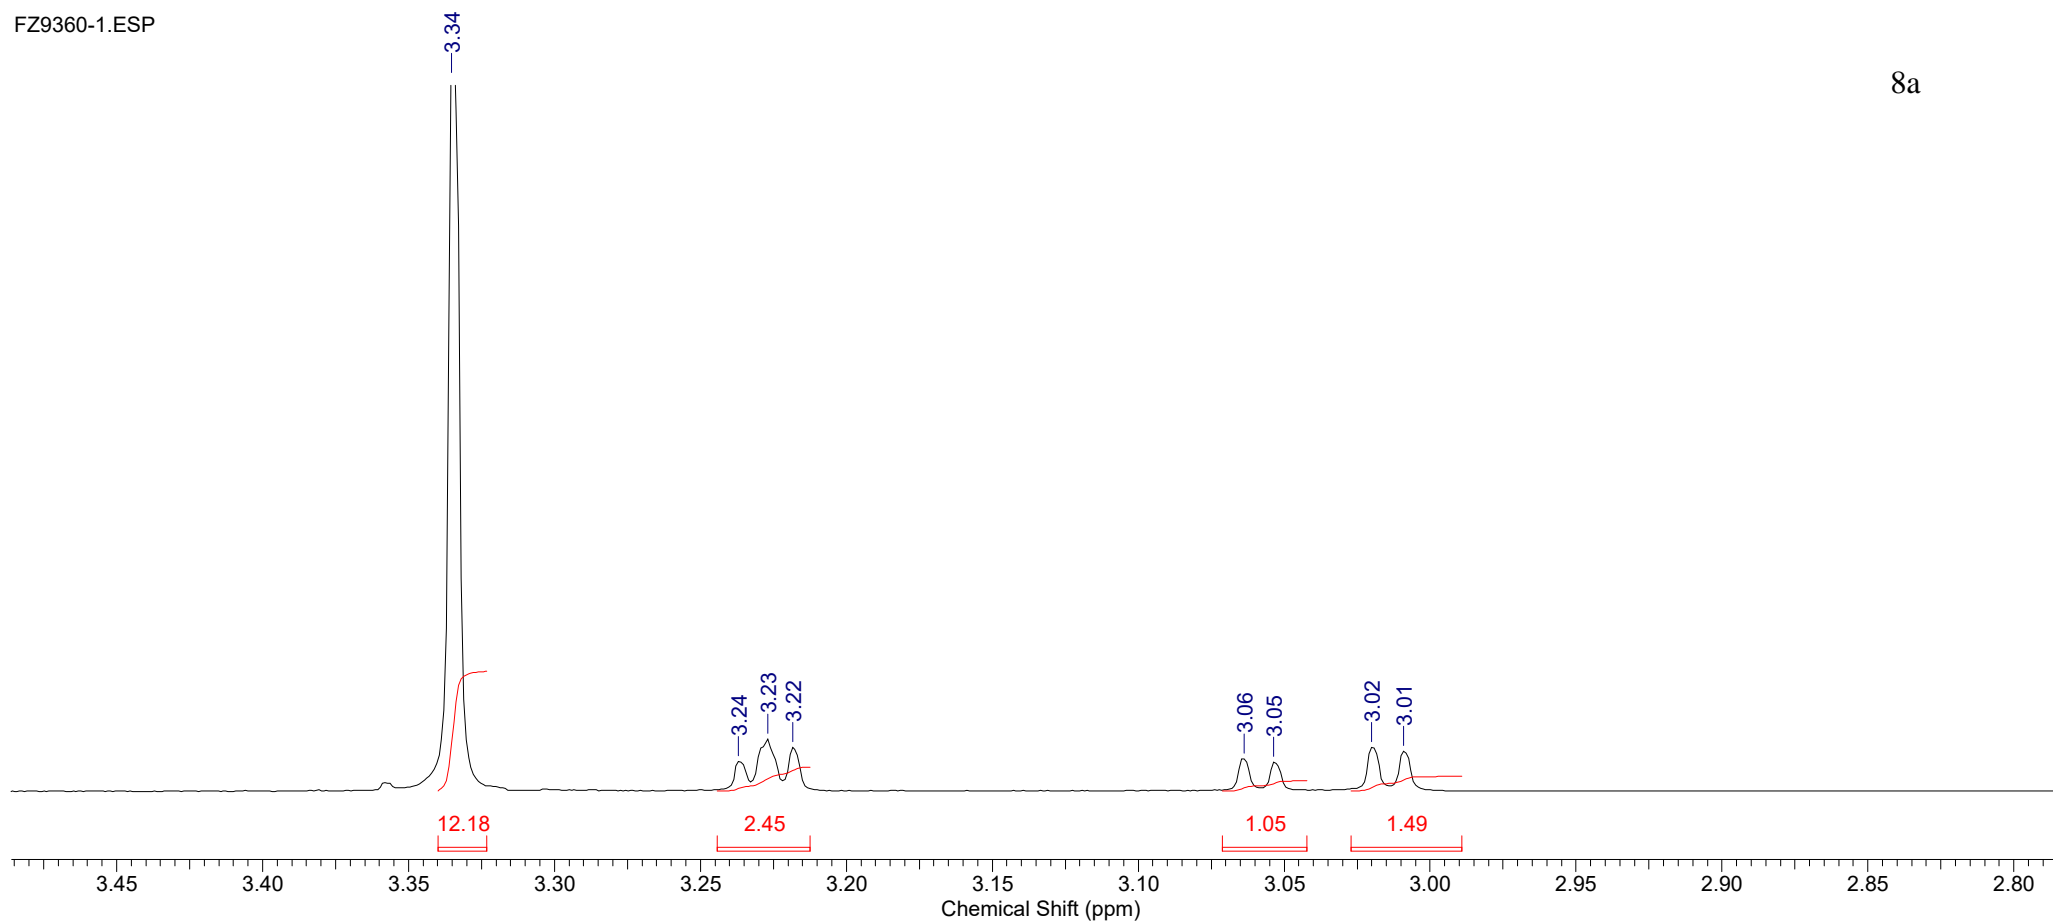

|                        |                      |                      |                                                               |                      |                      |                        |        |                       |          |
|------------------------|----------------------|----------------------|---------------------------------------------------------------|----------------------|----------------------|------------------------|--------|-----------------------|----------|
| Acquisition Time (sec) | 2.7263               | Comment              | FZ-9361                                                       | Date                 | 21 Dec 2020 17:21:04 |                        |        |                       |          |
| Date Stamp             | 21 Dec 2020 17:21:04 | File Name            | C:\Users\User\Desktop\Poma 21.12.20\FZ-9361\FZ-9361_001000fid |                      |                      |                        |        |                       |          |
| Frequency (MHz)        | 300.13               | Nucleus              | 1H                                                            | Number of Transients | 24                   | Origin                 | spect  | Original Points Count | 32768    |
| Owner                  | nmr                  | Points Count         | 32768                                                         | Pulse Sequence       | zg                   | Receiver Gain          | 202.48 | SW(cyclical) (Hz)     | 12019.23 |
| Solvent                | DMSO-d6              | Spectrum Offset (Hz) | 1347.4315                                                     | Sweep Width (Hz)     | 12018.86             | Temperature (degree C) | 28.995 |                       |          |

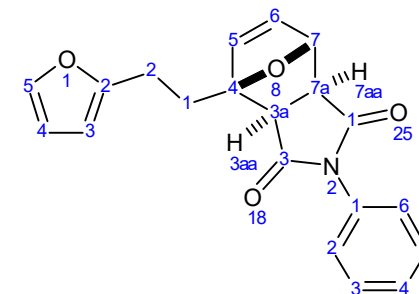

FZ-9361\_001000FID.ESP

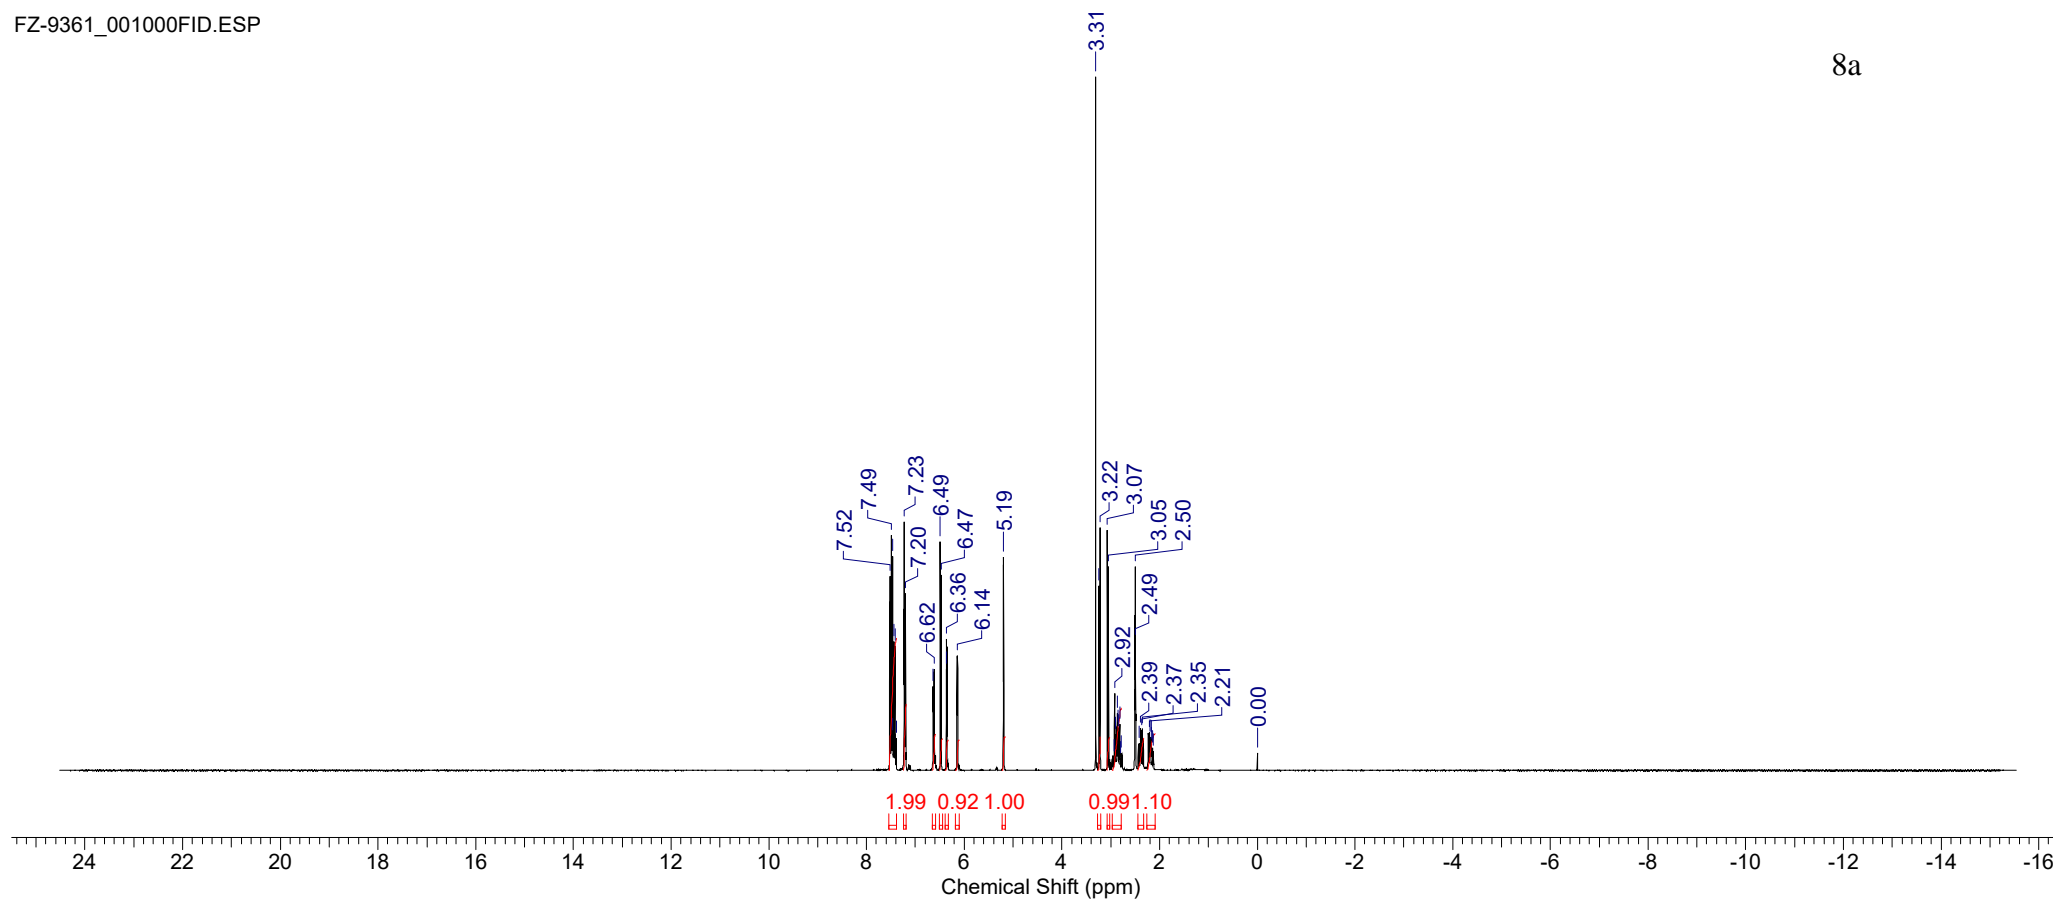



|                               |                      |                             |                                                               |                             |                      |                               |        |                              |          |
|-------------------------------|----------------------|-----------------------------|---------------------------------------------------------------|-----------------------------|----------------------|-------------------------------|--------|------------------------------|----------|
| <b>Acquisition Time (sec)</b> | 2.7263               | <b>Comment</b>              | FZ-9361                                                       | <b>Date</b>                 | 21 Dec 2020 17:21:04 |                               |        |                              |          |
| <b>Date Stamp</b>             | 21 Dec 2020 17:21:04 | <b>File Name</b>            | C:\Users\User\Desktop\Poma 21.12.20\FZ-9361\FZ-9361_001000fid |                             |                      |                               |        |                              |          |
| <b>Frequency (MHz)</b>        | 300.13               | <b>Nucleus</b>              | 1H                                                            | <b>Number of Transients</b> | 24                   | <b>Origin</b>                 | spect  | <b>Original Points Count</b> | 32768    |
| <b>Owner</b>                  | nmr                  | <b>Points Count</b>         | 32768                                                         | <b>Pulse Sequence</b>       | zg                   | <b>Receiver Gain</b>          | 202.48 | <b>SW(cyclical) (Hz)</b>     | 12019.23 |
| <b>Solvent</b>                | DMSO-d6              | <b>Spectrum Offset (Hz)</b> | 1347.4315                                                     | <b>Sweep Width (Hz)</b>     | 12018.86             | <b>Temperature (degree C)</b> | 28.995 |                              |          |



8a

FZ-9361\_001000FID.ESP

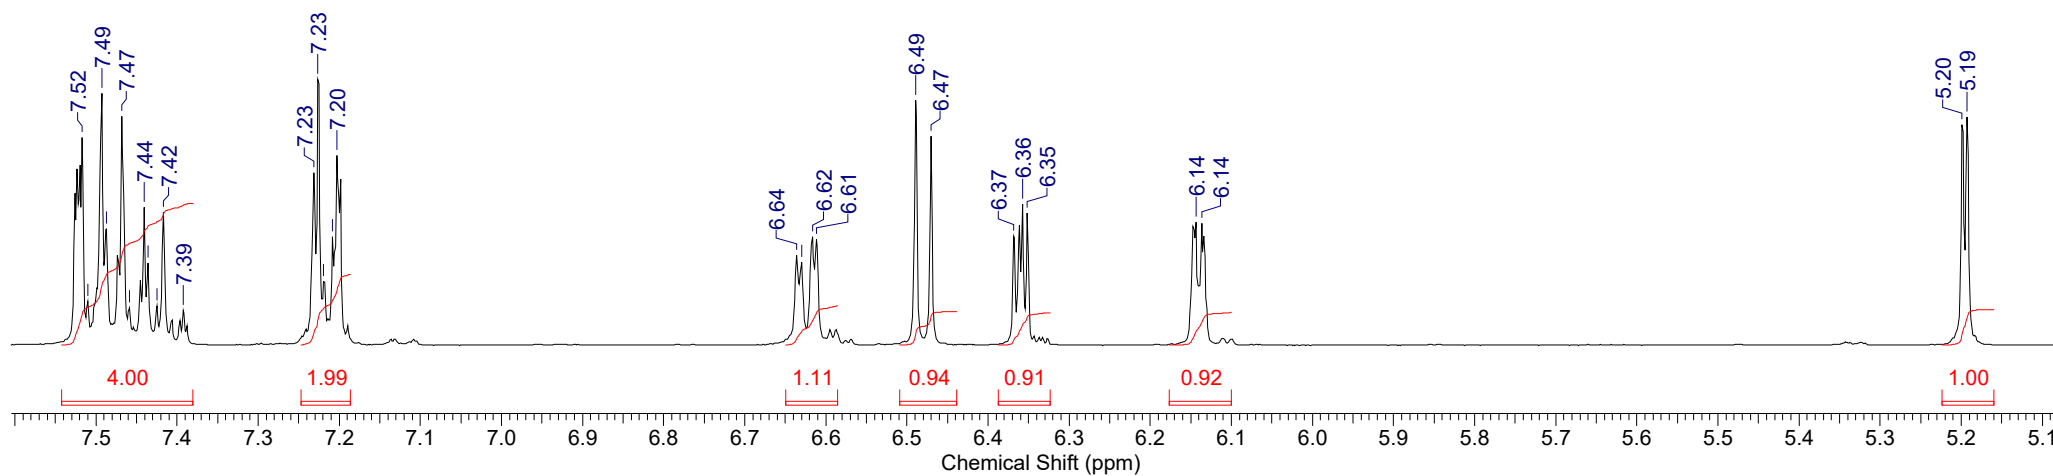

|                               |                      |                             |           |                             |                                                               |                               |        |                              |          |
|-------------------------------|----------------------|-----------------------------|-----------|-----------------------------|---------------------------------------------------------------|-------------------------------|--------|------------------------------|----------|
| <b>Acquisition Time (sec)</b> | 2.7263               | <b>Comment</b>              | FZ-9361   | <b>Date</b>                 | 21 Dec 2020 17:21:04                                          |                               |        |                              |          |
| <b>Date Stamp</b>             | 21 Dec 2020 17:21:04 |                             |           | <b>File Name</b>            | C:\Users\User\Desktop\Poma 21.12.20\FZ-9361\FZ-9361_001000fid |                               |        |                              |          |
| <b>Frequency (MHz)</b>        | 300.13               | <b>Nucleus</b>              | 1H        | <b>Number of Transients</b> | 24                                                            | <b>Origin</b>                 | spect  | <b>Original Points Count</b> | 32768    |
| <b>Owner</b>                  | nmr                  | <b>Points Count</b>         | 32768     | <b>Pulse Sequence</b>       | zg                                                            | <b>Receiver Gain</b>          | 202.48 | <b>SW(cyclical) (Hz)</b>     | 12019.23 |
| <b>Solvent</b>                | DMSO-d6              | <b>Spectrum Offset (Hz)</b> | 1347.4315 | <b>Sweep Width (Hz)</b>     | 12018.86                                                      | <b>Temperature (degree C)</b> | 28.995 |                              |          |



FZ-9361\_001000FID.ESP

8a

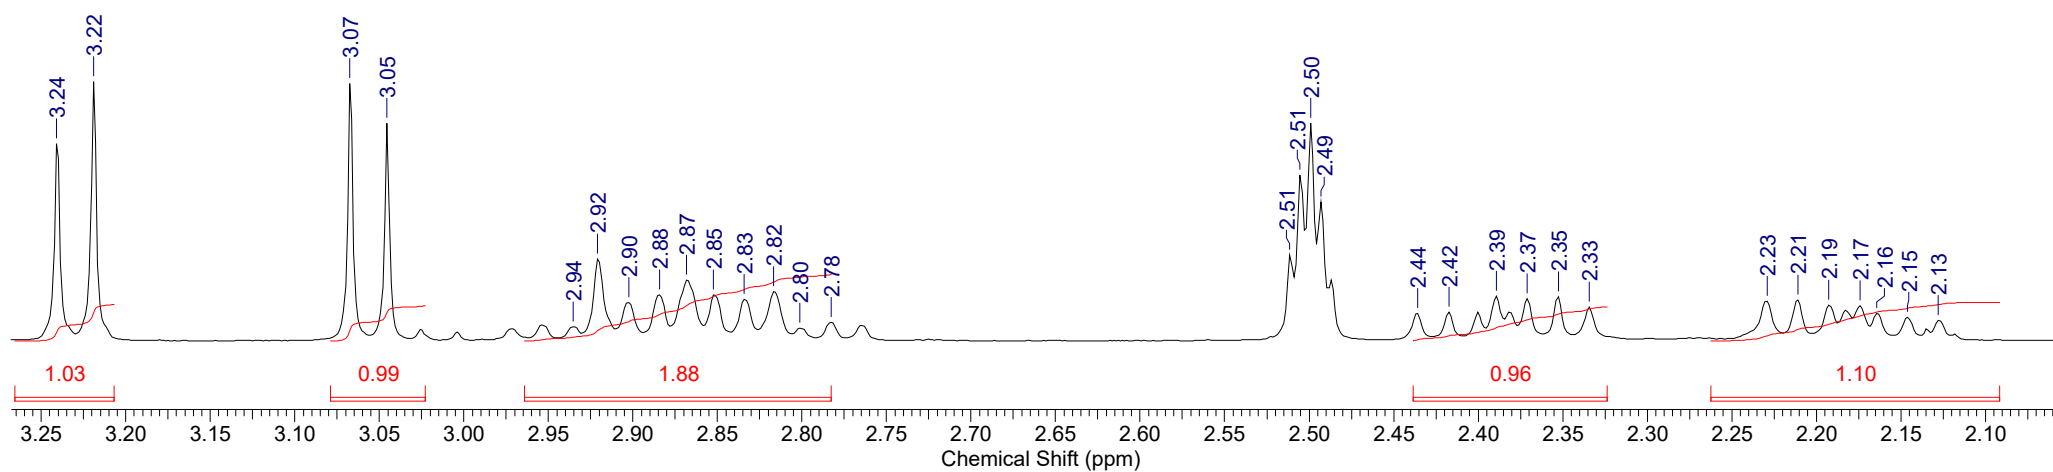

|                               |                      |                             |                                              |                             |             |                               |        |                              |          |
|-------------------------------|----------------------|-----------------------------|----------------------------------------------|-----------------------------|-------------|-------------------------------|--------|------------------------------|----------|
| <b>Acquisition Time (sec)</b> | 0.9339               | <b>Comment</b>              | FZ-9361-C13dec                               |                             | <b>Date</b> | 23 Dec 2020 17:50:56          |        |                              |          |
| <b>Date Stamp</b>             | 23 Dec 2020 17:50:56 | <b>File Name</b>            | C:\USERS\LIZA\DESKTOP\FZ-9361-C13DEC_013001r |                             |             |                               |        |                              |          |
| <b>Frequency (MHz)</b>        | 75.47                | <b>Nucleus</b>              | 13C                                          | <b>Number of Transients</b> | 432         | <b>Origin</b>                 | spect  | <b>Original Points Count</b> | 24576    |
| <b>Owner</b>                  | nmr                  | <b>Points Count</b>         | 131072                                       | <b>Pulse Sequence</b>       | zgpg        | <b>Receiver Gain</b>          | 202.48 | <b>SW(cyclical) (Hz)</b>     | 26315.79 |
| <b>Solvent</b>                | DMSO-d6              | <b>Spectrum Offset (Hz)</b> | 7546.7729                                    | <b>Sweep Width (Hz)</b>     | 26315.59    | <b>Temperature (degree C)</b> | 29.042 |                              |          |

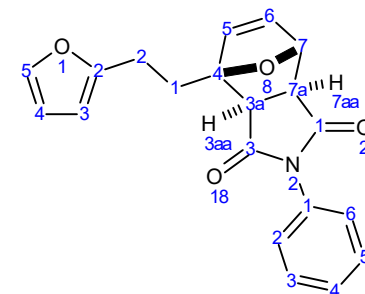

8a

FZ-9361-C13DEC\_013001r

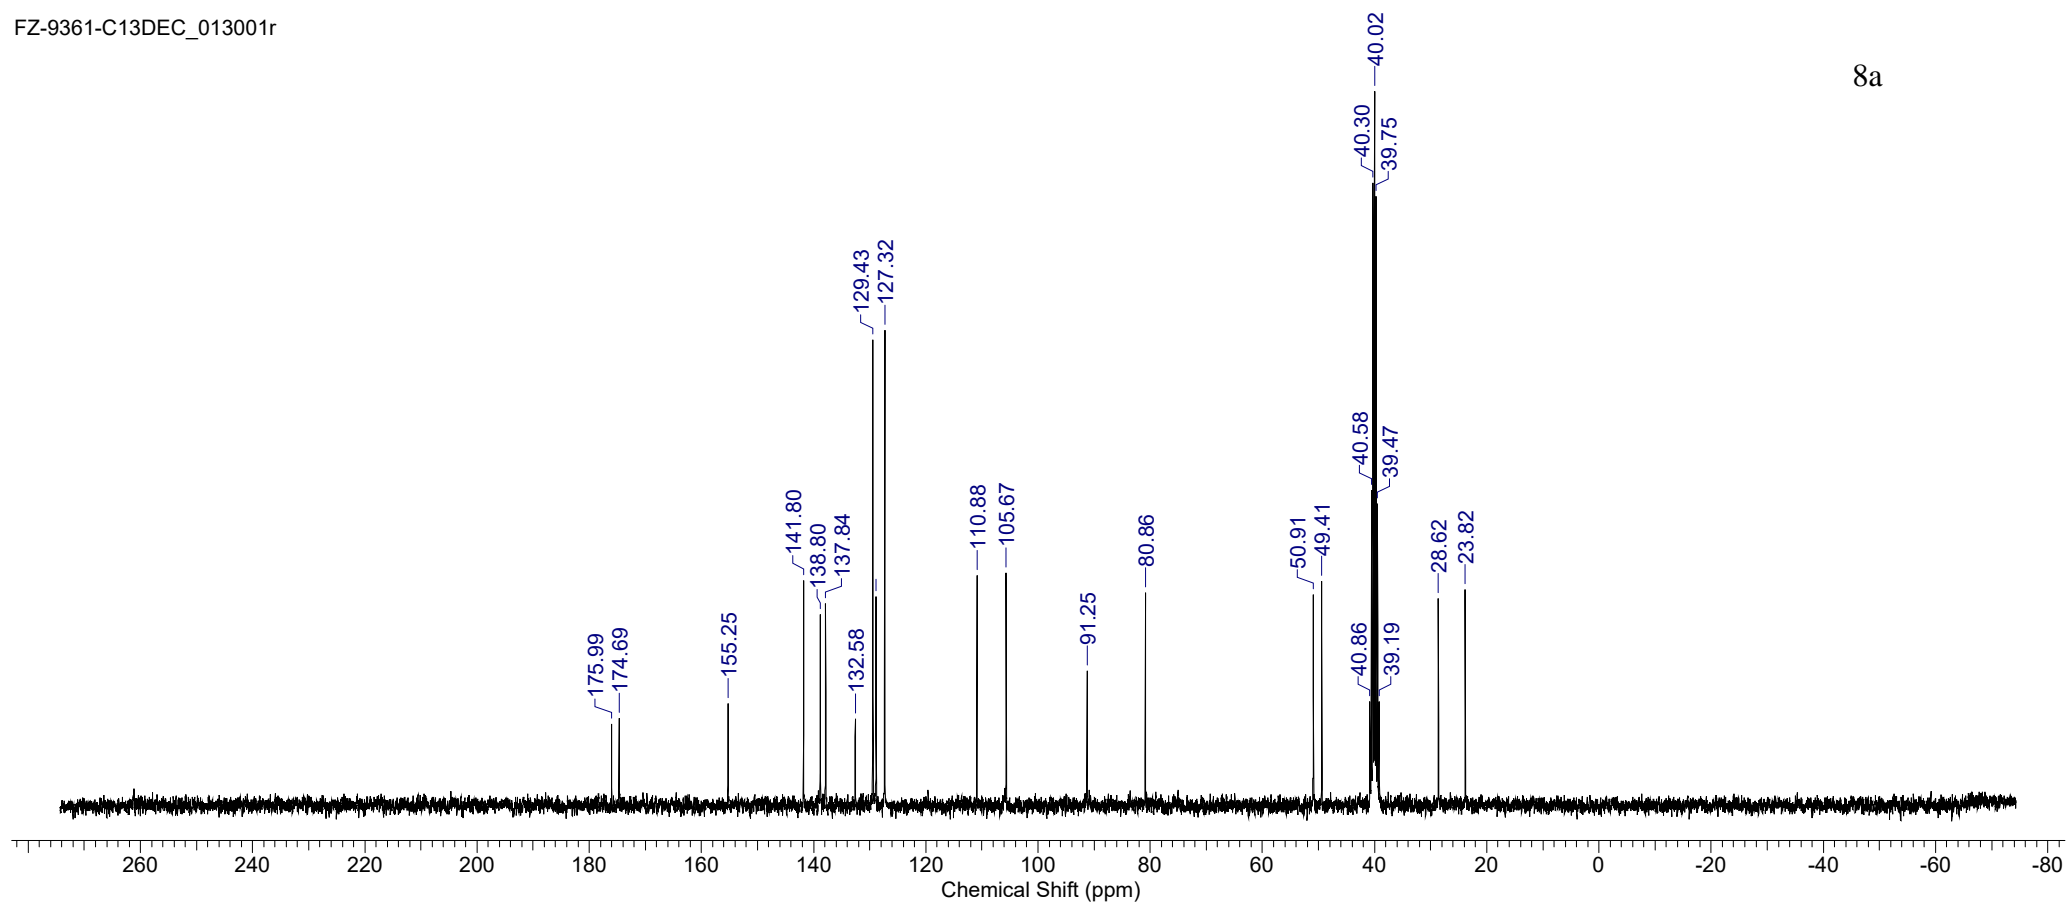

|                               |                      |                             |                                               |                             |                      |                               |        |                              |          |
|-------------------------------|----------------------|-----------------------------|-----------------------------------------------|-----------------------------|----------------------|-------------------------------|--------|------------------------------|----------|
| <b>Acquisition Time (sec)</b> | 0.9339               | <b>Comment</b>              | FZ-9361-C13dec                                | <b>Date</b>                 | 23 Dec 2020 17:50:56 |                               |        |                              |          |
| <b>Date Stamp</b>             | 23 Dec 2020 17:50:56 | <b>File Name</b>            | C:\USERS\LIZA \DESKTOP\FZ-9361-C13DEC_013001r |                             |                      |                               |        |                              |          |
| <b>Frequency (MHz)</b>        | 75.47                | <b>Nucleus</b>              | 13C                                           | <b>Number of Transients</b> | 432                  | <b>Origin</b>                 | spect  | <b>Original Points Count</b> | 24576    |
| <b>Owner</b>                  | nmr                  | <b>Points Count</b>         | 131072                                        | <b>Pulse Sequence</b>       | zgpgg                | <b>Receiver Gain</b>          | 202.48 | <b>SW(cyclical) (Hz)</b>     | 26315.79 |
| <b>Solvent</b>                | DMSO-d6              | <b>Spectrum Offset (Hz)</b> | 7546.7729                                     | <b>Sweep Width (Hz)</b>     | 26315.59             | <b>Temperature (degree C)</b> | 29.042 |                              |          |



FZ-9361-C13DEC\_013001r

8a

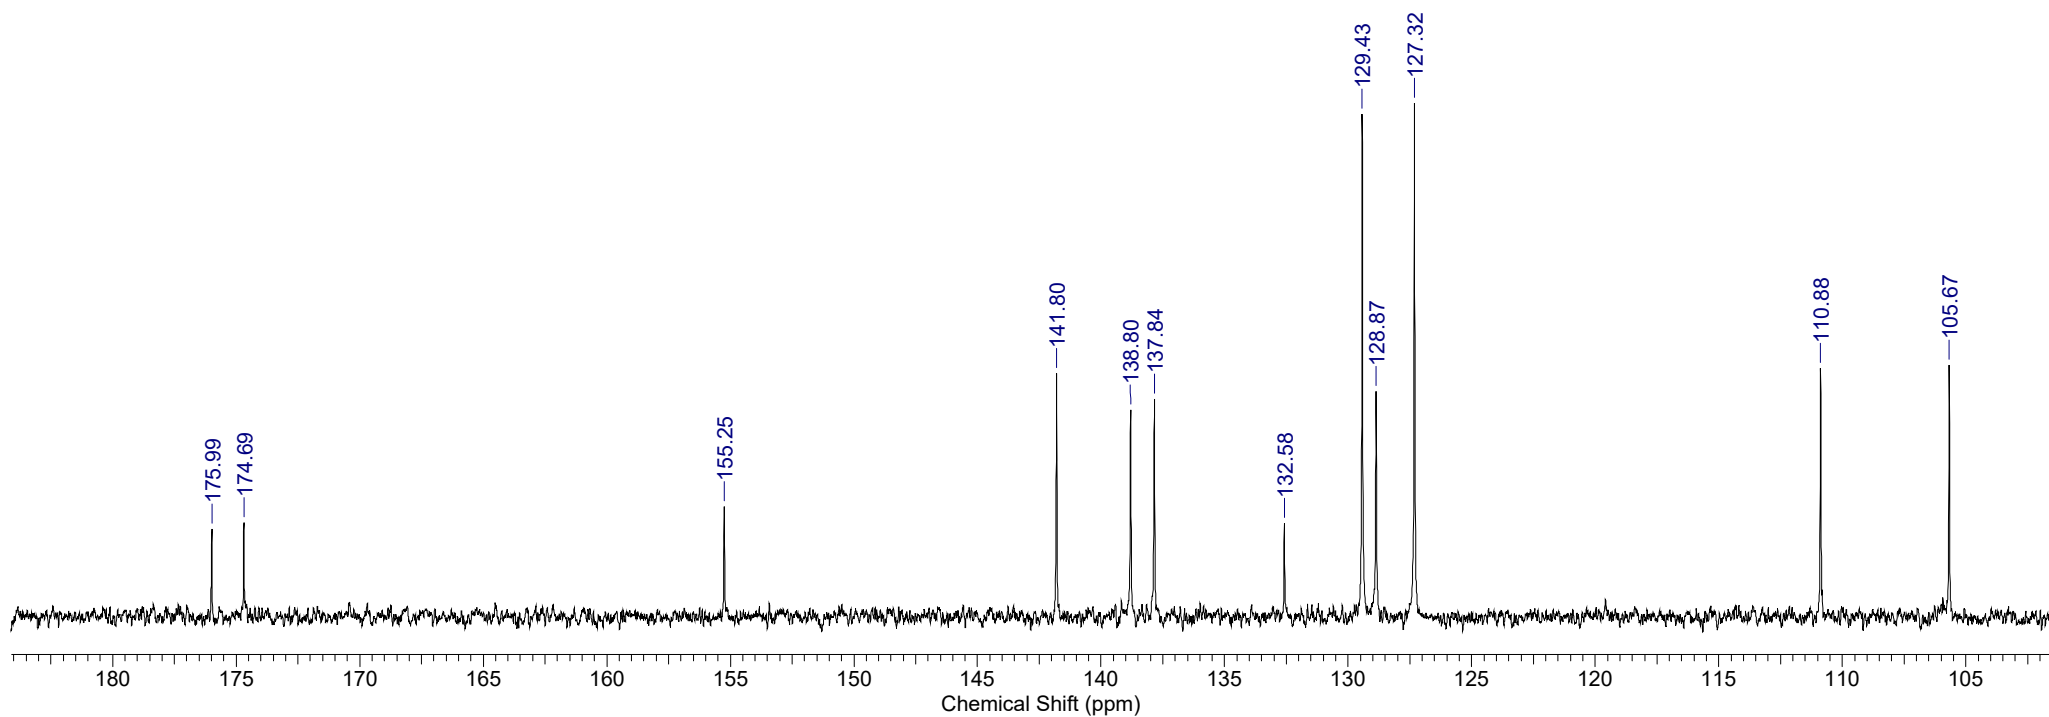



|                                                                |                    |
|----------------------------------------------------------------|--------------------|
| <b>Formula</b> C <sub>22</sub> H <sub>21</sub> NO <sub>4</sub> | <b>FW</b> 363.4064 |
|----------------------------------------------------------------|--------------------|

|                                                                |                                      |                                        |
|----------------------------------------------------------------|--------------------------------------|----------------------------------------|
| <b>Acquisition Time (sec)</b> 2.3593                           | <b>Date</b> 27 Jan 2021 09:21:04     | <b>Date Stamp</b> 27 Jan 2021 09:21:04 |
| <b>File Name</b> C:\Users\User\Desktop\27.01.21\FZ9380_001001r | <b>Frequency (MHz)</b> 700.17        | <b>Nucleus</b> 1H                      |
| <b>Origin</b> Avance                                           | <b>Original Points Count</b> 32768   | <b>Owner</b> nmr                       |
| <b>Receiver Gain</b> 32.00                                     | <b>SW(cyclical) (Hz)</b> 13888.89    | <b>Points Count</b> 65536              |
| <b>Sweep Width (Hz)</b> 13888.68                               | <b>Temperature (degree C)</b> 25.007 | <b>Solvent</b> CHLOROFORM-d            |
|                                                                |                                      | <b>Number of Transients</b> 8          |
|                                                                |                                      | <b>Pulse Sequence</b> zg30             |
|                                                                |                                      | <b>Spectrum Offset (Hz)</b> 4305.6274  |

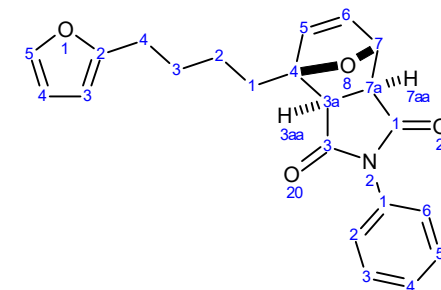

8b

FZ9380\_001001R.ESP

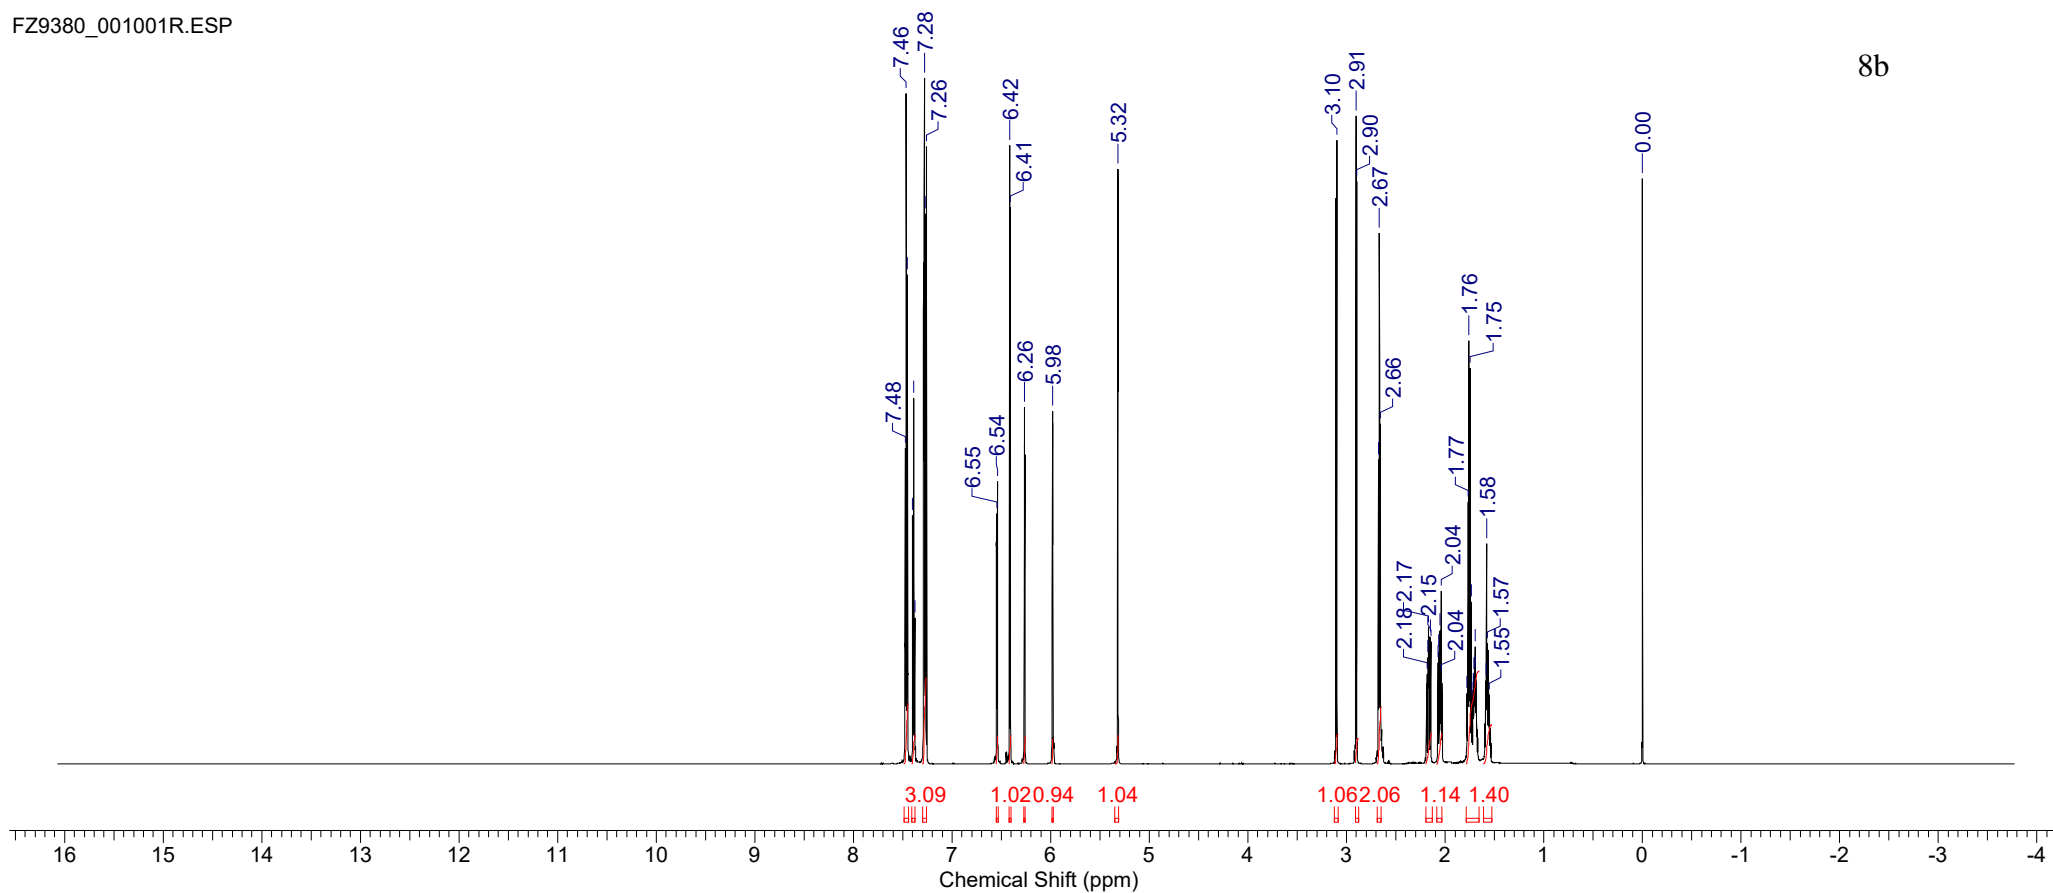

|                                                                |                    |
|----------------------------------------------------------------|--------------------|
| <b>Formula</b> C <sub>22</sub> H <sub>21</sub> NO <sub>4</sub> | <b>FW</b> 363.4064 |
|----------------------------------------------------------------|--------------------|

|                                                                |                                      |                                        |
|----------------------------------------------------------------|--------------------------------------|----------------------------------------|
| <b>Acquisition Time (sec)</b> 2.3593                           | <b>Date</b> 27 Jan 2021 09:21:04     | <b>Date Stamp</b> 27 Jan 2021 09:21:04 |
| <b>File Name</b> C:\Users\User\Desktop\27.01.21\FZ9380_001001r | <b>Frequency (MHz)</b> 700.17        | <b>Nucleus</b> 1H                      |
| <b>Origin</b> Avance                                           | <b>Original Points Count</b> 32768   | <b>Owner</b> nmr                       |
| <b>Receiver Gain</b> 32.00                                     | <b>SW(cyclical) (Hz)</b> 13888.89    | <b>Solvent</b> CHLOROFORM-d            |
| <b>Sweep Width (Hz)</b> 13888.68                               | <b>Temperature (degree C)</b> 25.007 | <b>Number of Transients</b> 8          |
|                                                                |                                      | <b>Pulse Sequence</b> zg30             |
|                                                                |                                      | <b>Spectrum Offset (Hz)</b> 4305.6274  |

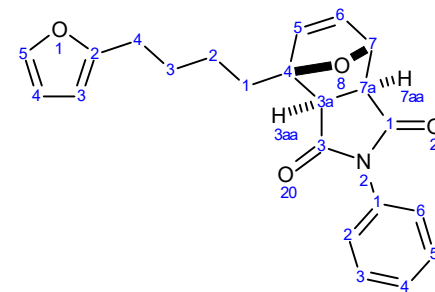

8b

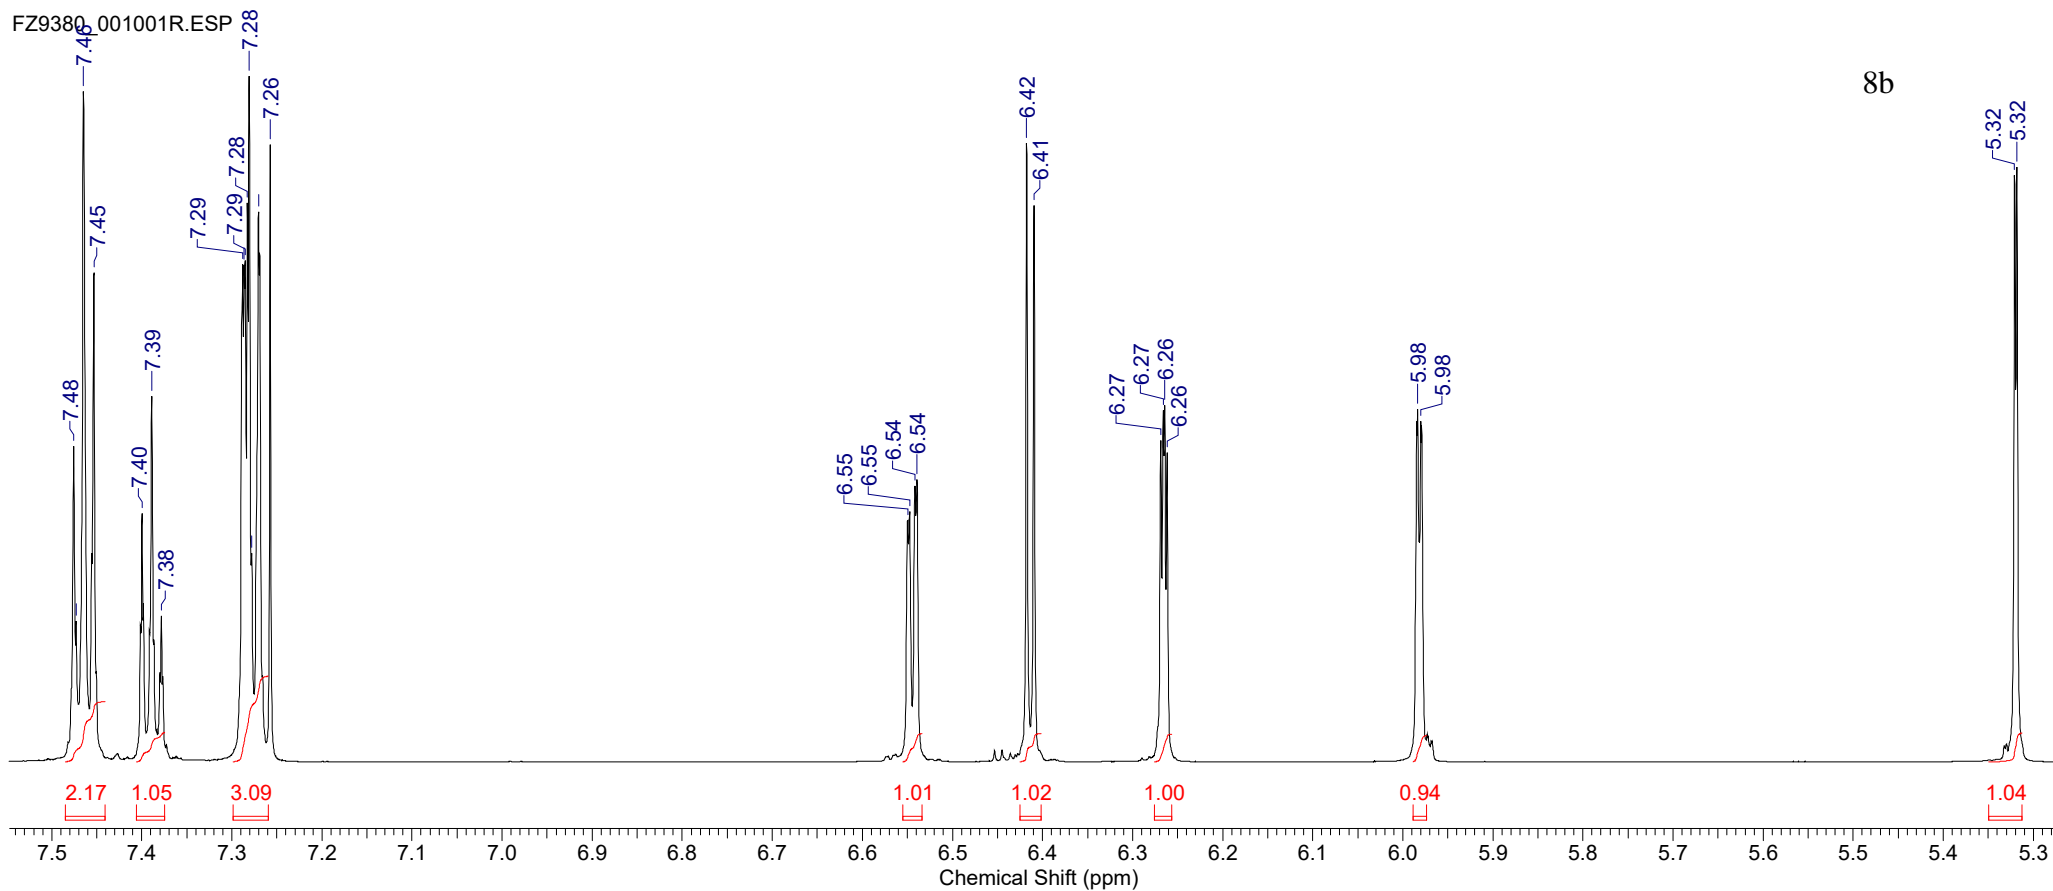

Formula C<sub>22</sub>H<sub>21</sub>NO<sub>4</sub> FW 363.4064

|                        |                                               |                        |                      |                      |                      |
|------------------------|-----------------------------------------------|------------------------|----------------------|----------------------|----------------------|
| Acquisition Time (sec) | 2.3593                                        | Date                   | 27 Jan 2021 09:21:04 | Date Stamp           | 27 Jan 2021 09:21:04 |
| File Name              | C:\Users\User\Desktop\27.01.21\FZ9380_001001r | Frequency (MHz)        | 700.17               | Nucleus              | 1H                   |
| Origin                 | Avance                                        | Original Points Count  | 32768                | Points Count         | 65536                |
| Receiver Gain          | 32.00                                         | SW(cyclical) (Hz)      | 13888.89             | Solvent              | CHLOROFORM-d         |
| Sweep Width (Hz)       | 13888.68                                      | Temperature (degree C) | 25.007               | Number of Transients | 8                    |
|                        |                                               |                        |                      | Pulse Sequence       | zg30                 |
|                        |                                               |                        |                      | Spectrum Offset (Hz) | 4305.6274            |



8b

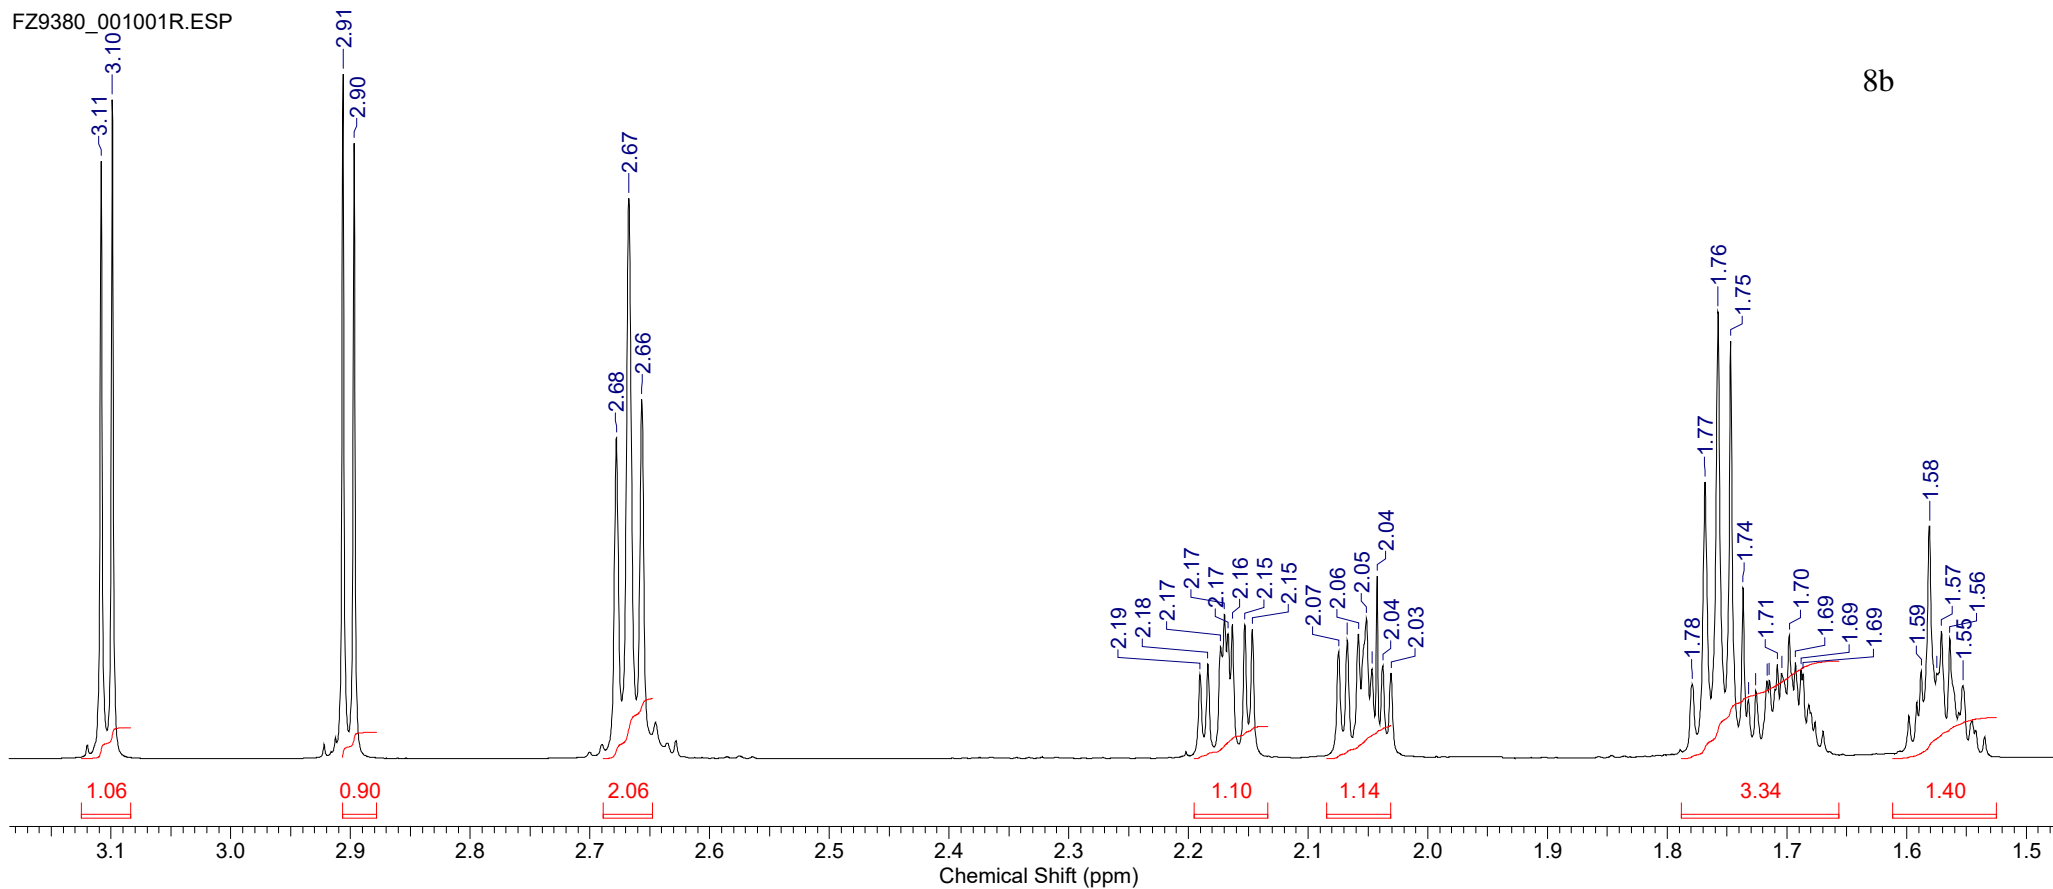



|                                                                |                    |
|----------------------------------------------------------------|--------------------|
| <b>Formula</b> C <sub>22</sub> H <sub>21</sub> NO <sub>4</sub> | <b>FW</b> 363.4064 |
|----------------------------------------------------------------|--------------------|

|                                            |                                      |                                        |
|--------------------------------------------|--------------------------------------|----------------------------------------|
| <b>Acquisition Time (sec)</b> 0.7864       | <b>Date</b> 27 Jan 2021 11:41:52     | <b>Date Stamp</b> 27 Jan 2021 11:41:52 |
| <b>File Name</b> H:\DESKTOP\FZ9380_002001r | <b>Frequency (MHz)</b> 176.06        | <b>Nucleus</b> 13C                     |
| <b>Origin</b> Avance                       | <b>Original Points Count</b> 32768   | <b>Points Count</b> 32768              |
| <b>Receiver Gain</b> 101.00                | <b>SW(cyclical) (Hz)</b> 41666.67    | <b>Solvent</b> CHLOROFORM-d            |
| <b>Sweep Width (Hz)</b> 41665.39           | <b>Temperature (degree C)</b> 25.005 | <b>Number of Transients</b> 512        |
|                                            |                                      | <b>Pulse Sequence</b> zgpg30           |
|                                            |                                      | <b>Spectrum Offset (Hz)</b> 17602.9199 |



8b

FZ9380\_002001r

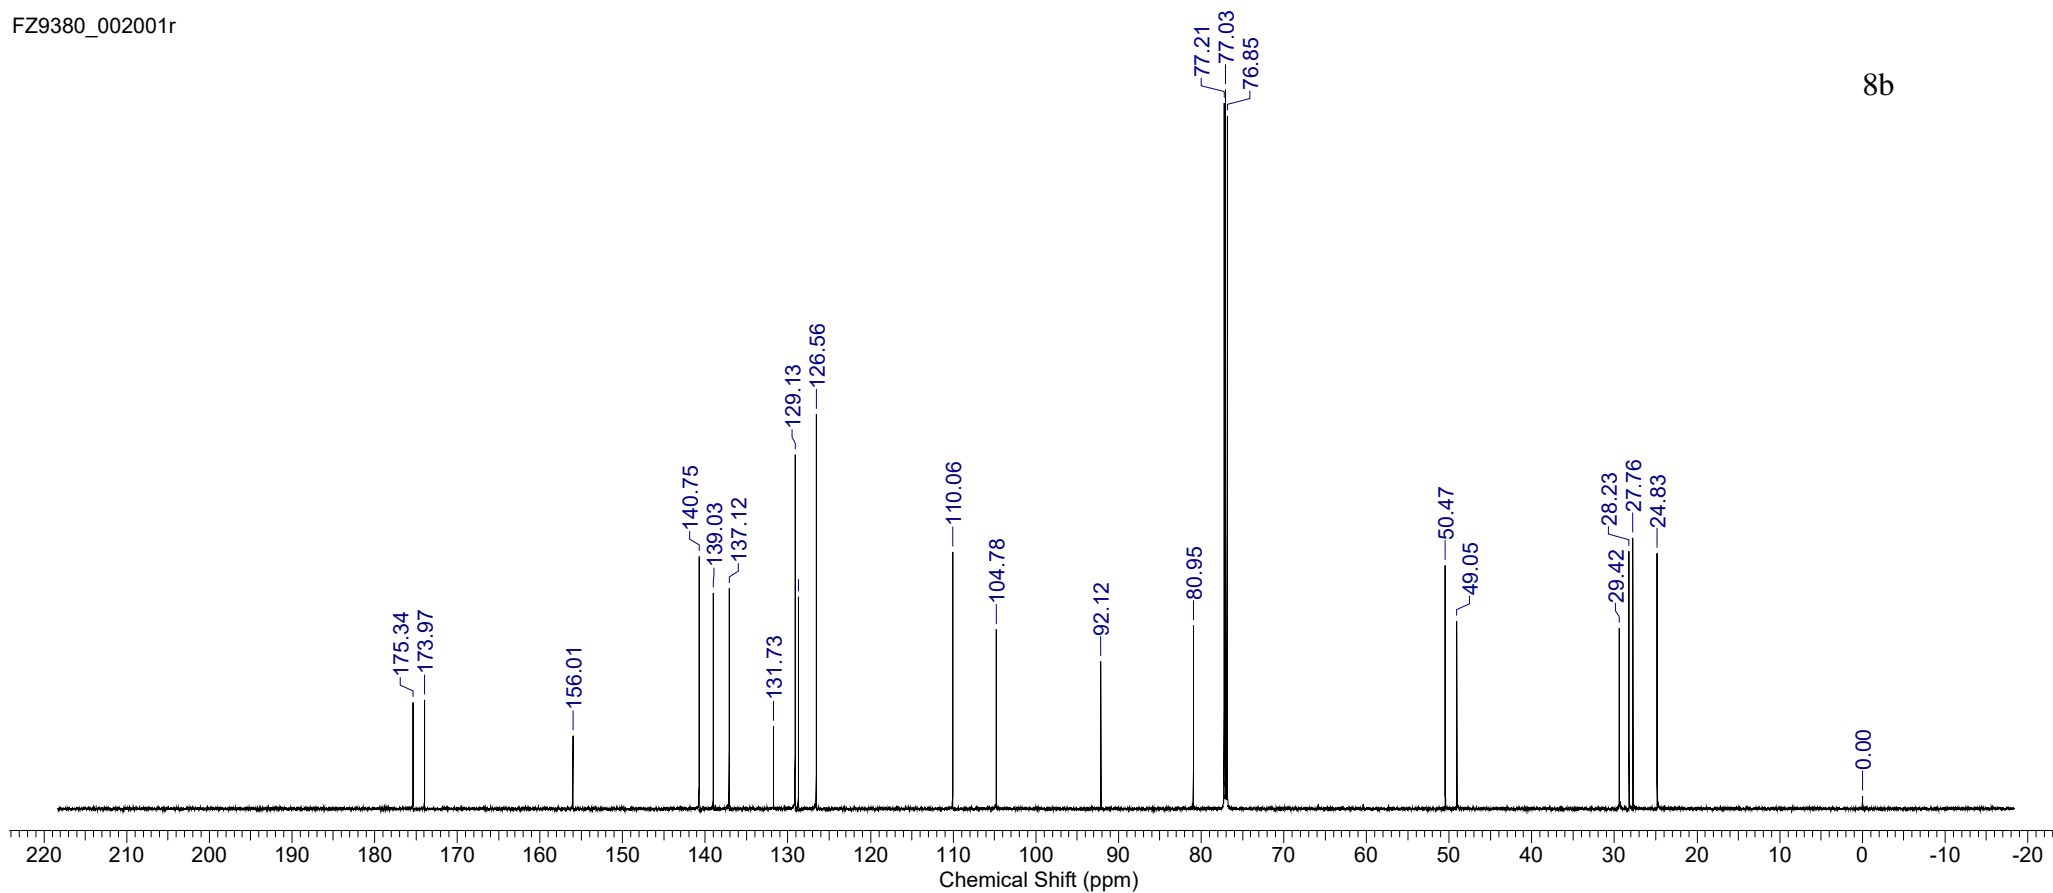

|                                                                |                    |
|----------------------------------------------------------------|--------------------|
| <b>Formula</b> C <sub>22</sub> H <sub>21</sub> NO <sub>4</sub> | <b>FW</b> 363.4064 |
|----------------------------------------------------------------|--------------------|

|                                            |                                      |                                        |
|--------------------------------------------|--------------------------------------|----------------------------------------|
| <b>Acquisition Time (sec)</b> 0.7864       | <b>Date</b> 27 Jan 2021 11:41:52     | <b>Date Stamp</b> 27 Jan 2021 11:41:52 |
| <b>File Name</b> H:\DESKTOP\FZ9380_002001r | <b>Frequency (MHz)</b> 176.06        | <b>Nucleus</b> 13C                     |
| <b>Origin</b> Avance                       | <b>Original Points Count</b> 32768   | <b>Points Count</b> 32768              |
| <b>Receiver Gain</b> 101.00                | <b>SW(cyclical) (Hz)</b> 41666.67    | <b>Solvent</b> CHLOROFORM-d            |
| <b>Sweep Width (Hz)</b> 41665.39           | <b>Temperature (degree C)</b> 25.005 | <b>Number of Transients</b> 512        |
|                                            |                                      | <b>Pulse Sequence</b> zgpg30           |
|                                            |                                      | <b>Spectrum Offset (Hz)</b> 17602.9199 |



FZ9380\_002001r

8b

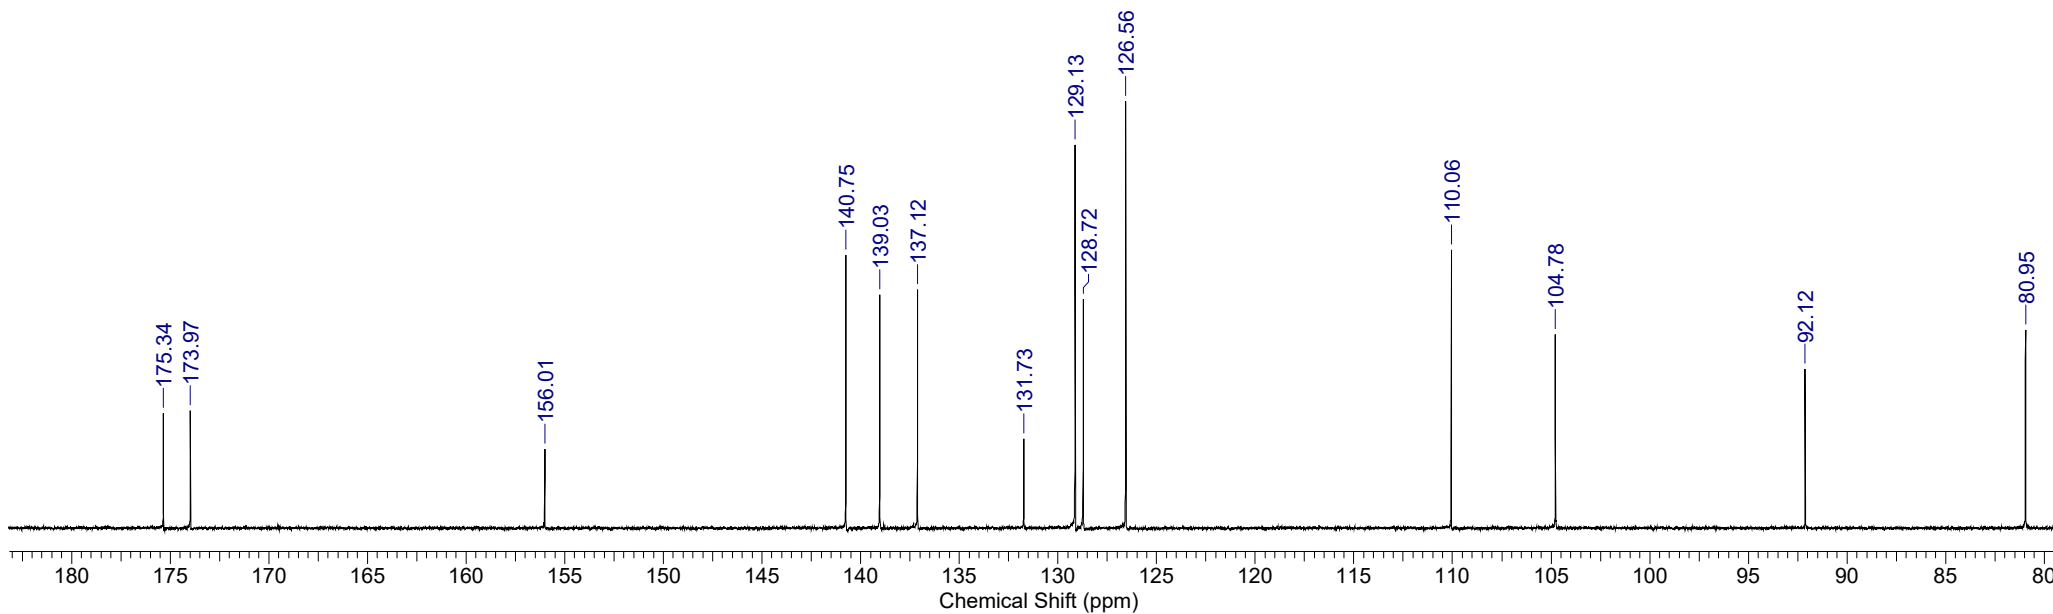

Formula C<sub>22</sub>H<sub>21</sub>NO<sub>4</sub> FW 363.4064

|                        |                           |                        |                      |         |              |                      |                      |                |        |
|------------------------|---------------------------|------------------------|----------------------|---------|--------------|----------------------|----------------------|----------------|--------|
| Acquisition Time (sec) | 0.7864                    | Date                   | 27 Jan 2021 11:41:52 |         | Date Stamp   | 27 Jan 2021 11:41:52 |                      |                |        |
| File Name              | H:\DESKTOP\FZ9380_002001r |                        | Frequency (MHz)      | 176.06  | Nucleus      | 13C                  | Number of Transients | 512            |        |
| Origin                 | Avance                    | Original Points Count  | 32768                | Owner   | nmr          | Points Count         | 32768                | Pulse Sequence | zgpg30 |
| Receiver Gain          | 101.00                    | SW(cyclical) (Hz)      | 41666.67             | Solvent | CHLOROFORM-d |                      | Spectrum Offset (Hz) | 17602.9199     |        |
| Sweep Width (Hz)       | 41665.39                  | Temperature (degree C) | 25.005               |         |              |                      |                      |                |        |



8b

FZ9380\_002001r

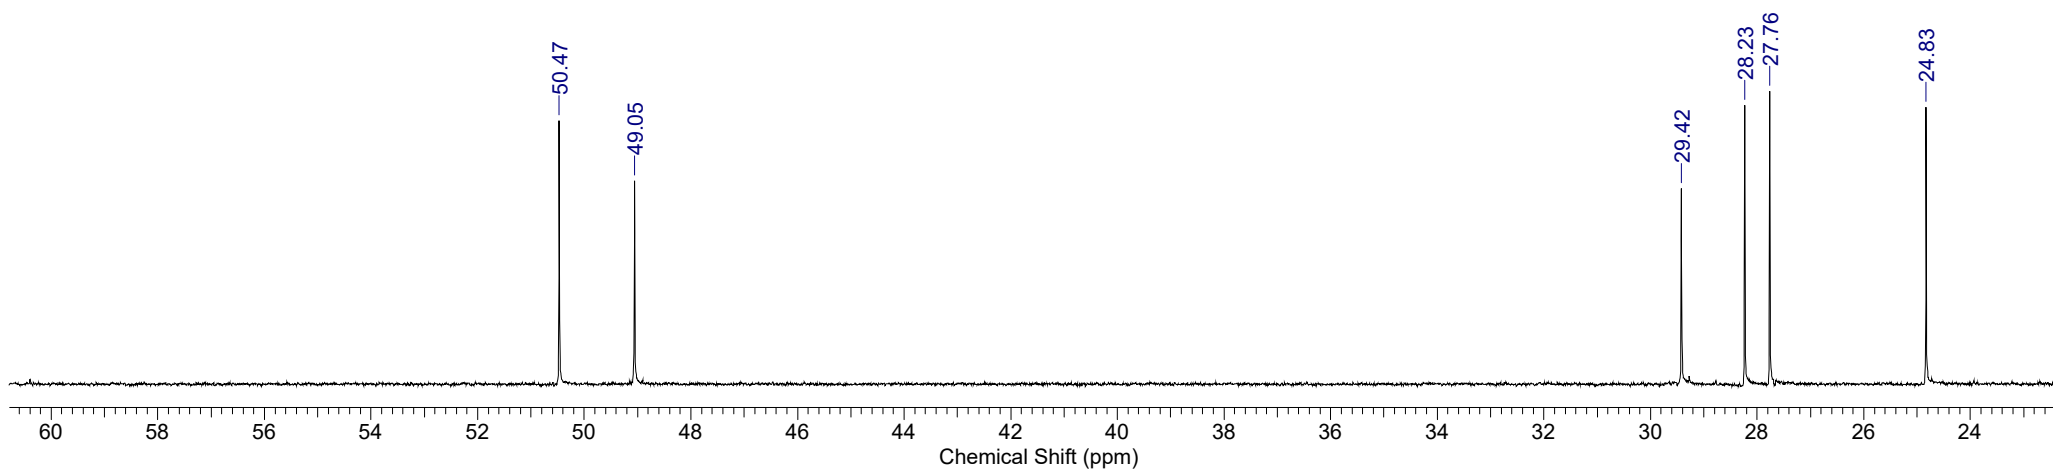

|                               |                      |                             |           |                             |                                                               |                               |        |                              |          |
|-------------------------------|----------------------|-----------------------------|-----------|-----------------------------|---------------------------------------------------------------|-------------------------------|--------|------------------------------|----------|
| <b>Acquisition Time (sec)</b> | 2.7263               | <b>Comment</b>              | FZ-9364   | <b>Date</b>                 | 21 Dec 2020 17:04:00                                          |                               |        |                              |          |
| <b>Date Stamp</b>             | 21 Dec 2020 17:04:00 |                             |           | <b>File Name</b>            | C:\Users\User\Desktop\Poma 21.12.20\FZ-9364\FZ-9364_001000fid |                               |        |                              |          |
| <b>Frequency (MHz)</b>        | 300.13               | <b>Nucleus</b>              | 1H        | <b>Number of Transients</b> | 24                                                            | <b>Origin</b>                 | spect  | <b>Original Points Count</b> | 32768    |
| <b>Owner</b>                  | nmr                  | <b>Points Count</b>         | 32768     | <b>Pulse Sequence</b>       | zg                                                            | <b>Receiver Gain</b>          | 202.48 | <b>SW(cyclical) (Hz)</b>     | 12019.23 |
| <b>Solvent</b>                | DMSO-d6              | <b>Spectrum Offset (Hz)</b> | 1347.0648 | <b>Sweep Width (Hz)</b>     | 12018.86                                                      | <b>Temperature (degree C)</b> | 28.989 |                              |          |

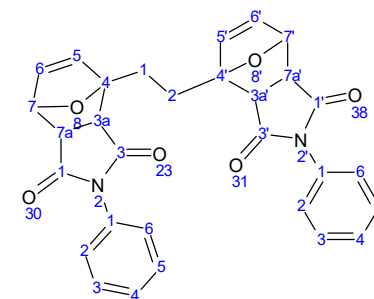

FZ-9364\_001000FID.ESP

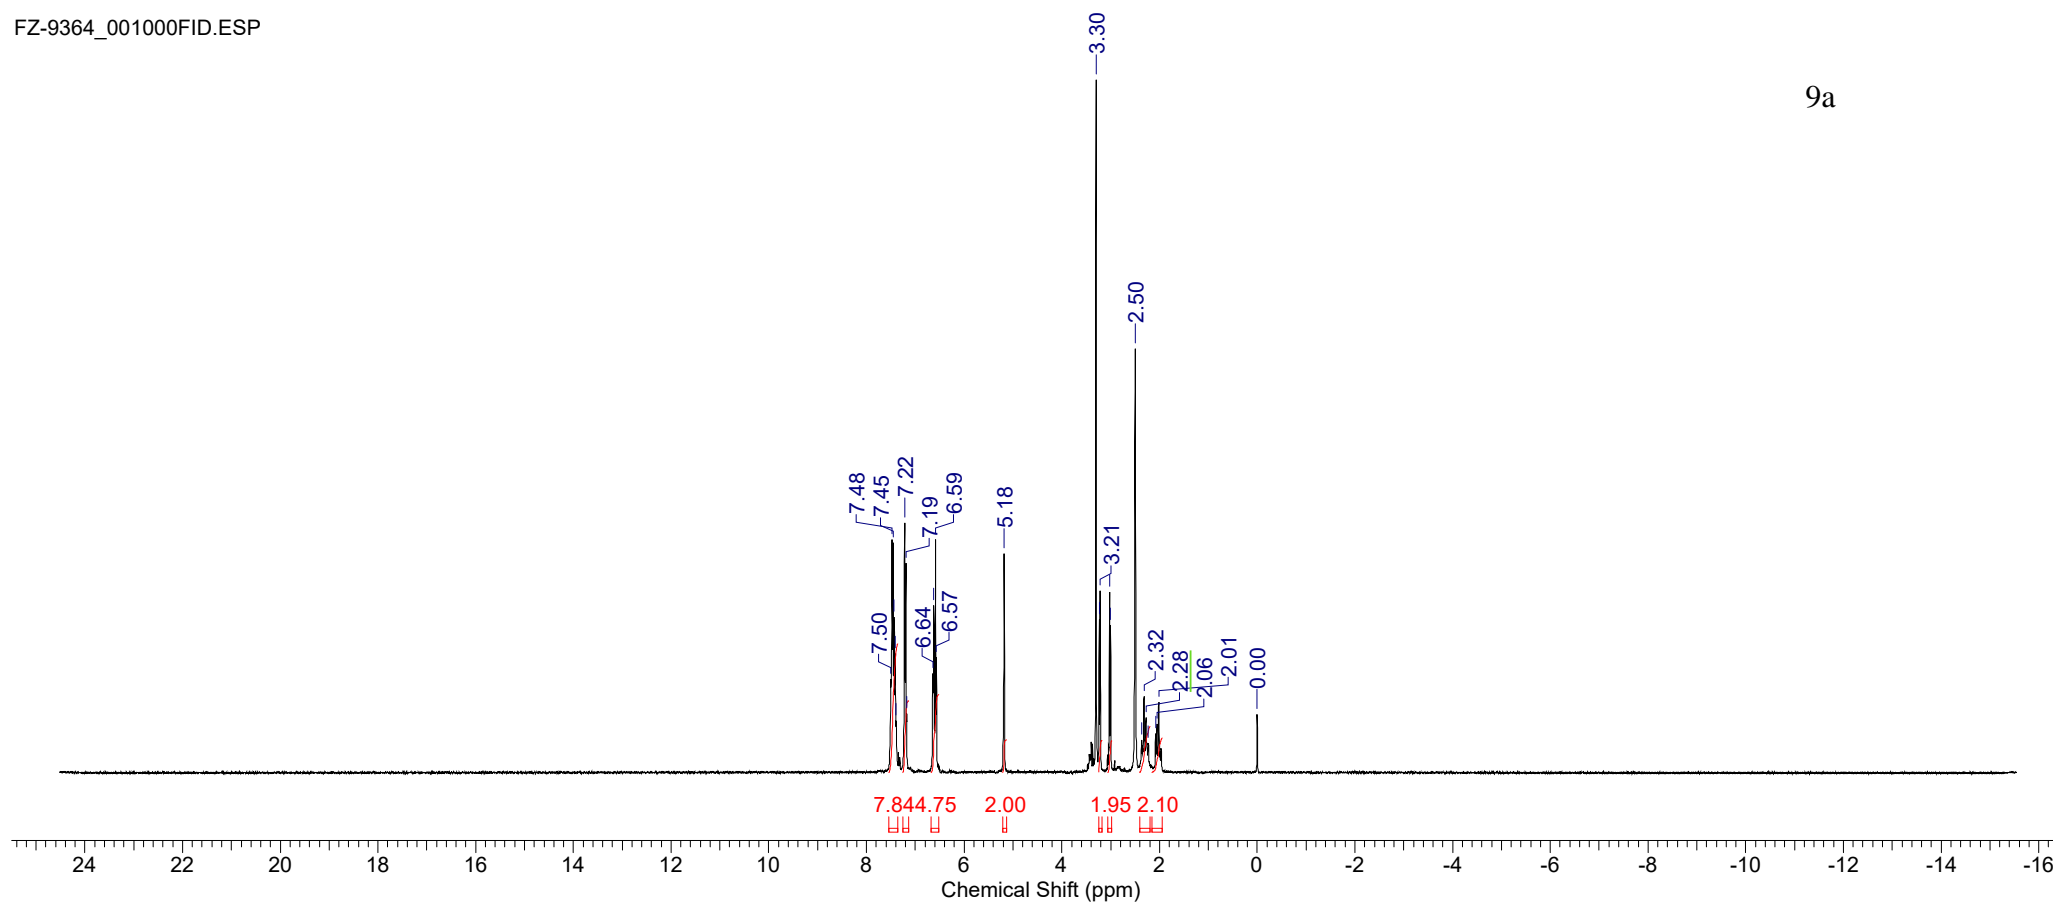

|                               |                      |                             |           |                             |                                                               |                               |        |                              |          |
|-------------------------------|----------------------|-----------------------------|-----------|-----------------------------|---------------------------------------------------------------|-------------------------------|--------|------------------------------|----------|
| <b>Acquisition Time (sec)</b> | 2.7263               | <b>Comment</b>              | FZ-9364   | <b>Date</b>                 | 21 Dec 2020 17:04:00                                          |                               |        |                              |          |
| <b>Date Stamp</b>             | 21 Dec 2020 17:04:00 |                             |           | <b>File Name</b>            | C:\Users\User\Desktop\Poma 21.12.20\FZ-9364\FZ-9364_001000fid |                               |        |                              |          |
| <b>Frequency (MHz)</b>        | 300.13               | <b>Nucleus</b>              | 1H        | <b>Number of Transients</b> | 24                                                            | <b>Origin</b>                 | spect  | <b>Original Points Count</b> | 32768    |
| <b>Owner</b>                  | nmr                  | <b>Points Count</b>         | 32768     | <b>Pulse Sequence</b>       | zg                                                            | <b>Receiver Gain</b>          | 202.48 | <b>SW(cyclical) (Hz)</b>     | 12019.23 |
| <b>Solvent</b>                | DMSO-d6              | <b>Spectrum Offset (Hz)</b> | 1347.0648 | <b>Sweep Width (Hz)</b>     | 12018.86                                                      | <b>Temperature (degree C)</b> | 28.989 |                              |          |

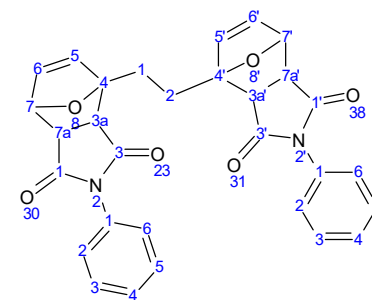

FZ-9364\_001000FID.ESP

9a

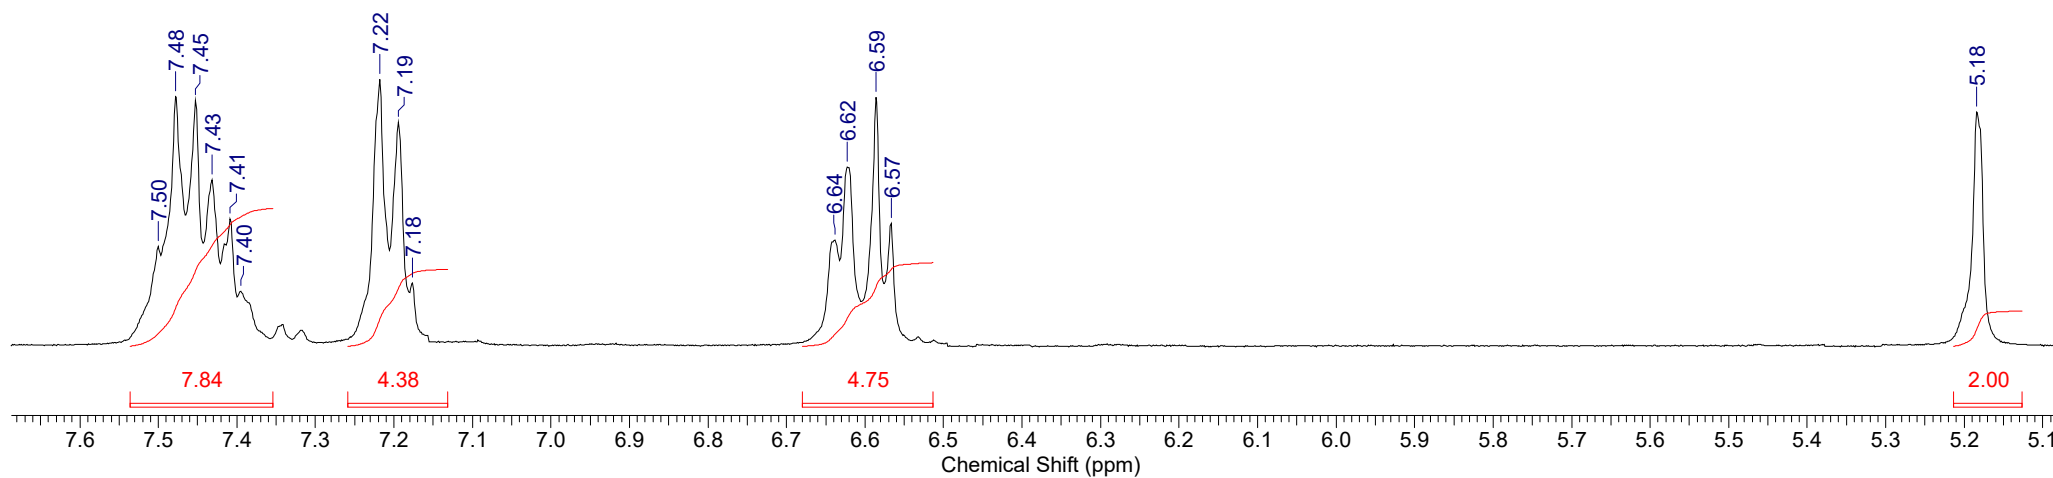

|                               |                      |                             |                  |                                                               |                      |                               |        |                              |          |
|-------------------------------|----------------------|-----------------------------|------------------|---------------------------------------------------------------|----------------------|-------------------------------|--------|------------------------------|----------|
| <b>Acquisition Time (sec)</b> | 2.7263               | <b>Comment</b>              | FZ-9364          | <b>Date</b>                                                   | 21 Dec 2020 17:04:00 |                               |        |                              |          |
| <b>Date Stamp</b>             | 21 Dec 2020 17:04:00 |                             | <b>File Name</b> | C:\Users\User\Desktop\Poma 21.12.20\FZ-9364\FZ-9364_001000fid |                      |                               |        |                              |          |
| <b>Frequency (MHz)</b>        | 300.13               | <b>Nucleus</b>              | 1H               | <b>Number of Transients</b>                                   | 24                   | <b>Origin</b>                 | spect  | <b>Original Points Count</b> | 32768    |
| <b>Owner</b>                  | nmr                  | <b>Points Count</b>         | 32768            | <b>Pulse Sequence</b>                                         | zg                   | <b>Receiver Gain</b>          | 202.48 | <b>SW(cyclical) (Hz)</b>     | 12019.23 |
| <b>Solvent</b>                | DMSO-d6              | <b>Spectrum Offset (Hz)</b> | 1347.0648        | <b>Sweep Width (Hz)</b>                                       | 12018.86             | <b>Temperature (degree C)</b> | 28.989 |                              |          |



FZ-9364\_001000FID.ESP

9a

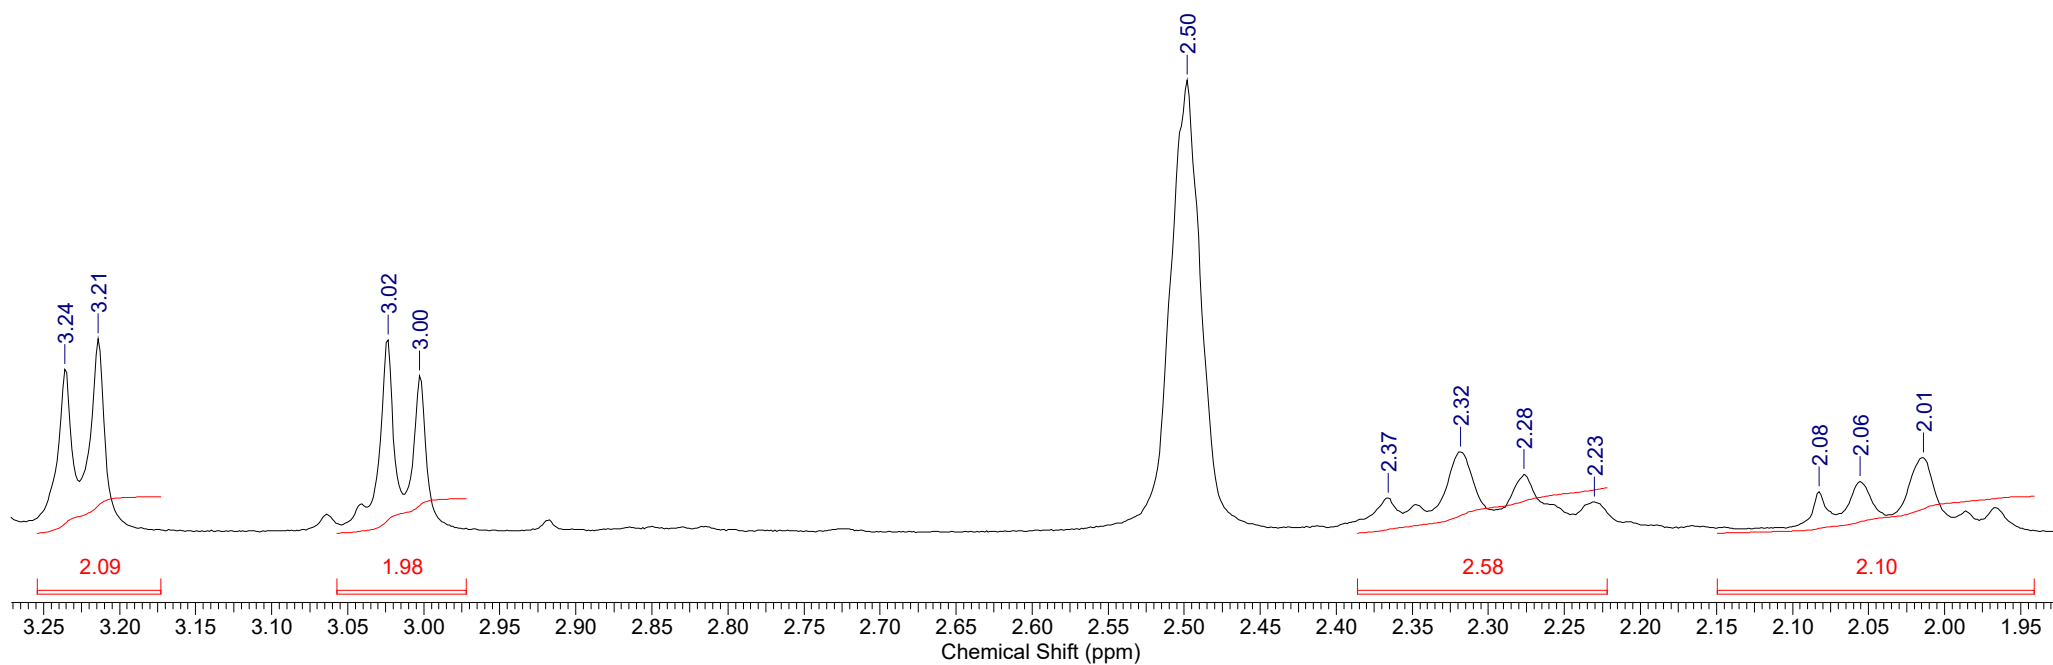

|                               |                      |                             |                  |                                              |             |                               |        |                              |          |
|-------------------------------|----------------------|-----------------------------|------------------|----------------------------------------------|-------------|-------------------------------|--------|------------------------------|----------|
| <b>Acquisition Time (sec)</b> | 0.9339               | <b>Comment</b>              | FZ-9364-C13dec   |                                              | <b>Date</b> | 23 Dec 2020 18:01:36          |        |                              |          |
| <b>Date Stamp</b>             | 23 Dec 2020 18:01:36 |                             | <b>File Name</b> | C:\USERS\LIZA\DESKTOP\FZ-9364-C13DEC_013001r |             |                               |        |                              |          |
| <b>Frequency (MHz)</b>        | 75.47                | <b>Nucleus</b>              | 13C              | <b>Number of Transients</b>                  | 728         | <b>Origin</b>                 | spect  | <b>Original Points Count</b> | 24576    |
| <b>Owner</b>                  | nmr                  | <b>Points Count</b>         | 131072           | <b>Pulse Sequence</b>                        | zgpgg       | <b>Receiver Gain</b>          | 202.48 | <b>SW(cyclical) (Hz)</b>     | 26315.79 |
| <b>Solvent</b>                | DMSO-d6              | <b>Spectrum Offset (Hz)</b> | 7546.7729        | <b>Sweep Width (Hz)</b>                      | 26315.59    | <b>Temperature (degree C)</b> | 29.171 |                              |          |

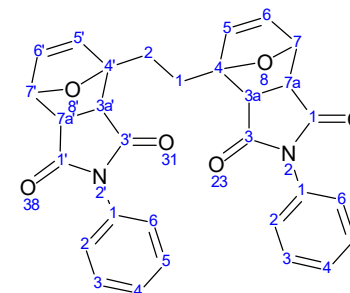

FZ-9364-C13DEC\_013001R.ESP

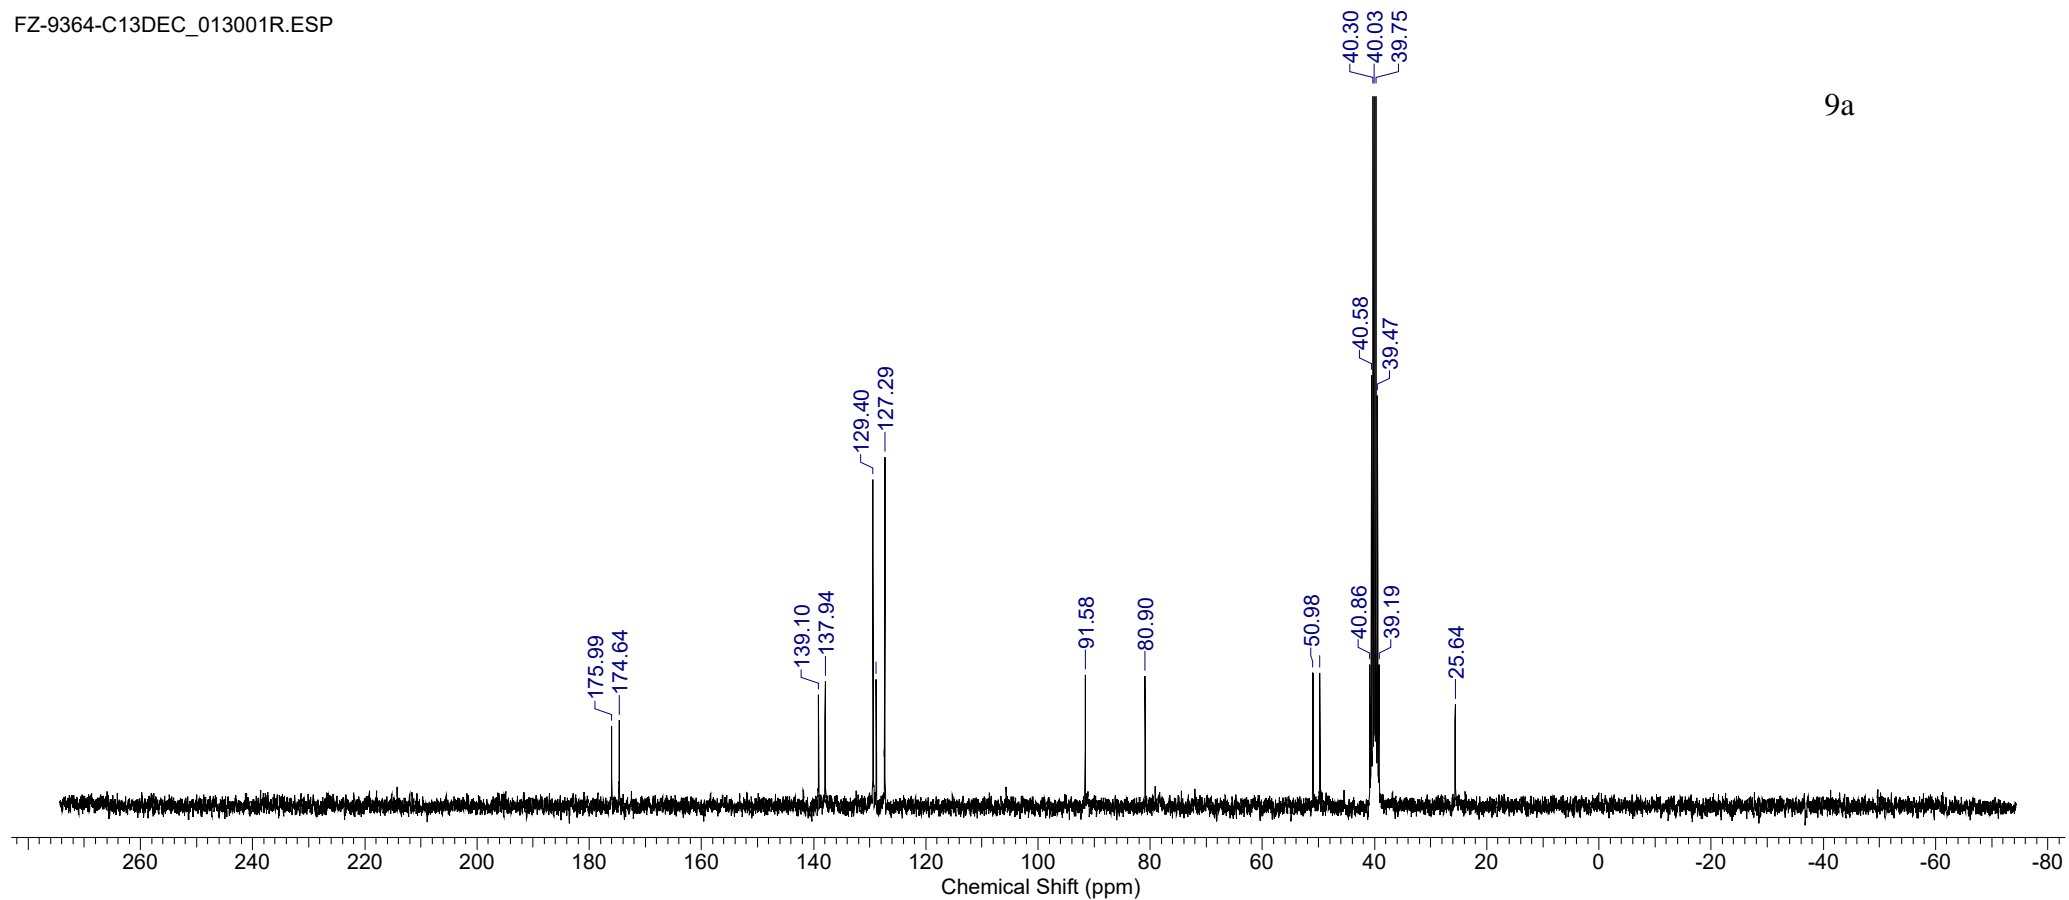

|                               |                      |                             |                  |                                              |             |                               |        |                              |          |
|-------------------------------|----------------------|-----------------------------|------------------|----------------------------------------------|-------------|-------------------------------|--------|------------------------------|----------|
| <b>Acquisition Time (sec)</b> | 0.9339               | <b>Comment</b>              | FZ-9364-C13dec   |                                              | <b>Date</b> | 23 Dec 2020 18:01:36          |        |                              |          |
| <b>Date Stamp</b>             | 23 Dec 2020 18:01:36 |                             | <b>File Name</b> | C:\USERS\LIZA\DESKTOP\FZ-9364-C13DEC_013001r |             |                               |        |                              |          |
| <b>Frequency (MHz)</b>        | 75.47                | <b>Nucleus</b>              | 13C              | <b>Number of Transients</b>                  | 728         | <b>Origin</b>                 | spect  | <b>Original Points Count</b> | 24576    |
| <b>Owner</b>                  | nmr                  | <b>Points Count</b>         | 131072           | <b>Pulse Sequence</b>                        | zgpg        | <b>Receiver Gain</b>          | 202.48 | <b>SW(cyclical) (Hz)</b>     | 26315.79 |
| <b>Solvent</b>                | DMSO-d6              | <b>Spectrum Offset (Hz)</b> | 7546.7729        | <b>Sweep Width (Hz)</b>                      | 26315.59    | <b>Temperature (degree C)</b> | 29.171 |                              |          |

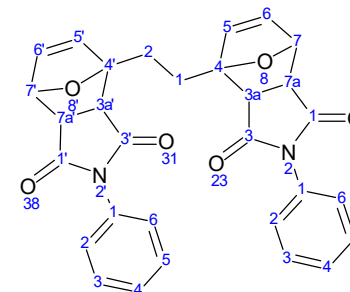

FZ-9364-C13DEC\_013001R.ESP

9a

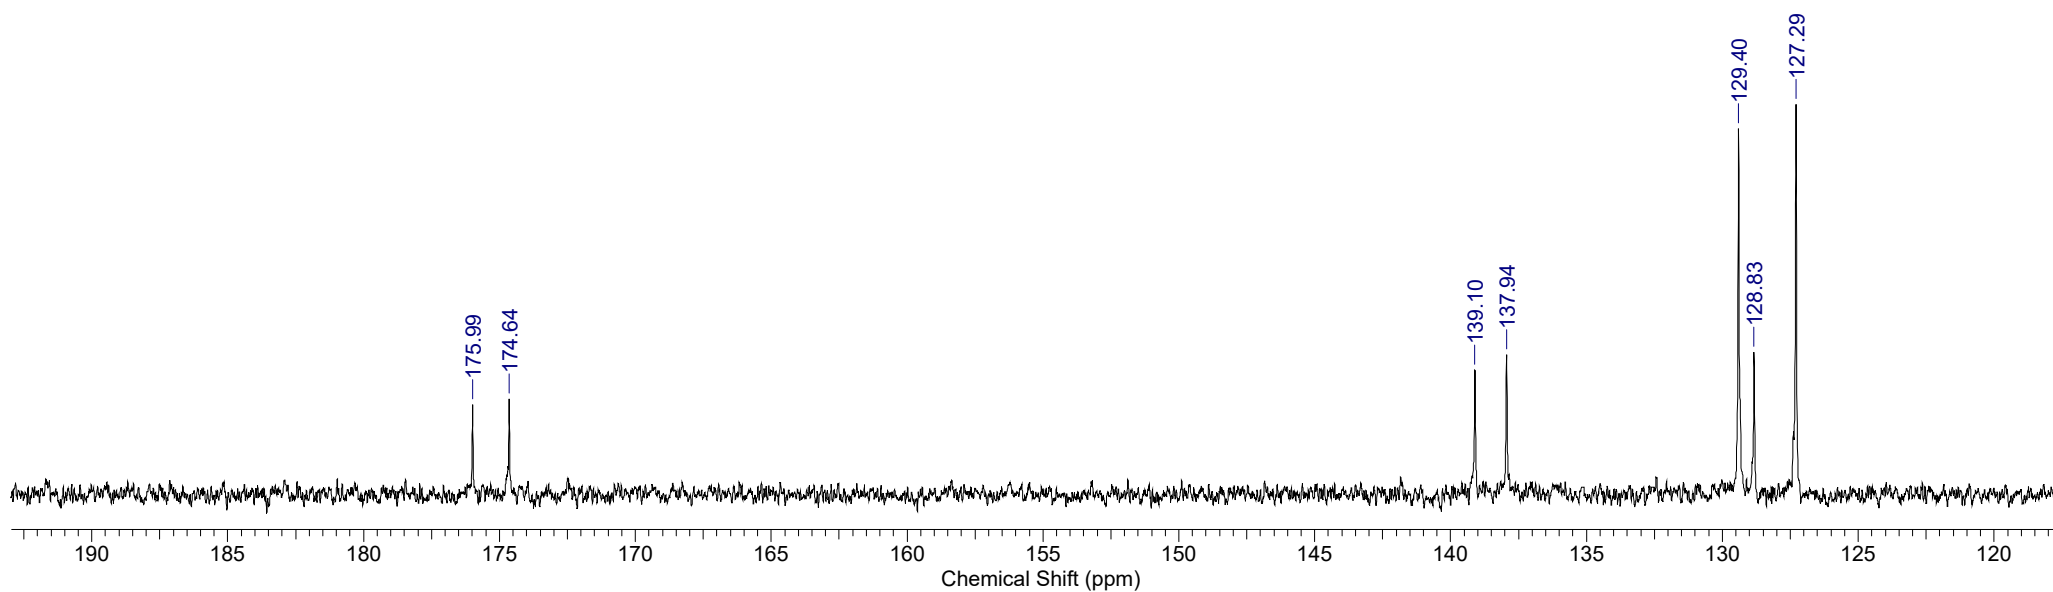



|                               |                      |                             |                                              |                             |             |                               |        |                              |          |
|-------------------------------|----------------------|-----------------------------|----------------------------------------------|-----------------------------|-------------|-------------------------------|--------|------------------------------|----------|
| <b>Acquisition Time (sec)</b> | 0.9339               | <b>Comment</b>              | FZ-9364-C13dec                               |                             | <b>Date</b> | 23 Dec 2020 18:01:36          |        |                              |          |
| <b>Date Stamp</b>             | 23 Dec 2020 18:01:36 | <b>File Name</b>            | C:\USERS\LIZA\DESKTOP\FZ-9364-C13DEC_013001r |                             |             |                               |        |                              |          |
| <b>Frequency (MHz)</b>        | 75.47                | <b>Nucleus</b>              | 13C                                          | <b>Number of Transients</b> | 728         | <b>Origin</b>                 | spect  | <b>Original Points Count</b> | 24576    |
| <b>Owner</b>                  | nmr                  | <b>Points Count</b>         | 131072                                       | <b>Pulse Sequence</b>       | zgpg        | <b>Receiver Gain</b>          | 202.48 | <b>SW(cyclical) (Hz)</b>     | 26315.79 |
| <b>Solvent</b>                | DMSO-d6              | <b>Spectrum Offset (Hz)</b> | 7546.7729                                    | <b>Sweep Width (Hz)</b>     | 26315.59    | <b>Temperature (degree C)</b> | 29.171 |                              |          |



FZ-9364-C13DEC\_013001R.ESP

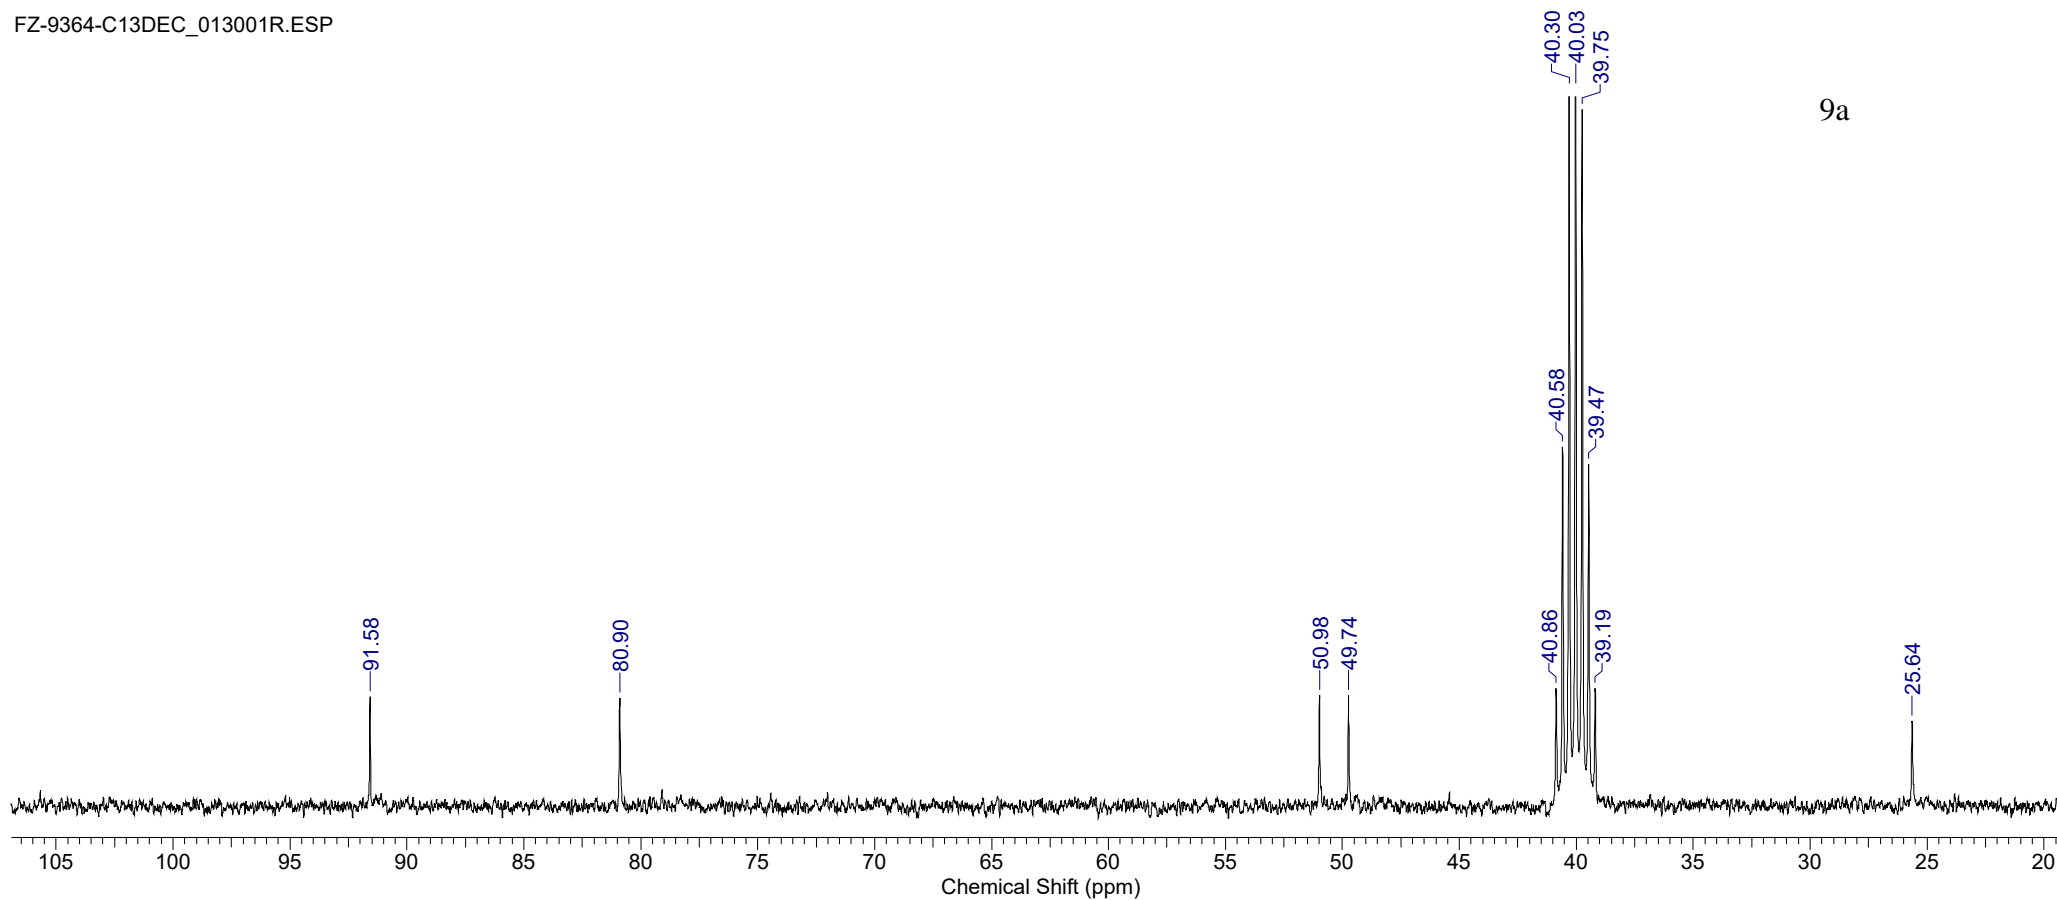

|                               |                      |                     |                             |                                                               |                         |                      |                               |                              |          |
|-------------------------------|----------------------|---------------------|-----------------------------|---------------------------------------------------------------|-------------------------|----------------------|-------------------------------|------------------------------|----------|
| <b>Acquisition Time (sec)</b> | 2.7263               | <b>Comment</b>      | FZ-9362                     | <b>Date</b>                                                   | 21 Dec 2020 16:51:12    |                      |                               |                              |          |
| <b>Date Stamp</b>             | 21 Dec 2020 16:51:12 |                     | <b>File Name</b>            | C:\Users\User\Desktop\Poma 21.12.20\FZ-9362\FZ-9362_001000fid |                         |                      |                               |                              |          |
| <b>Frequency (MHz)</b>        | 300.13               | <b>Nucleus</b>      | 1H                          | <b>Number of Transients</b>                                   | 24                      | <b>Origin</b>        | spect                         | <b>Original Points Count</b> | 32768    |
| <b>Owner</b>                  | nmr                  | <b>Points Count</b> | 32768                       | <b>Pulse Sequence</b>                                         | zg                      | <b>Receiver Gain</b> | 202.48                        | <b>SW(cyclical) (Hz)</b>     | 12019.23 |
| <b>Solvent</b>                | CHLOROFORM-d         |                     | <b>Spectrum Offset (Hz)</b> | 1342.2964                                                     | <b>Sweep Width (Hz)</b> | 12018.86             | <b>Temperature (degree C)</b> | 28.998                       |          |

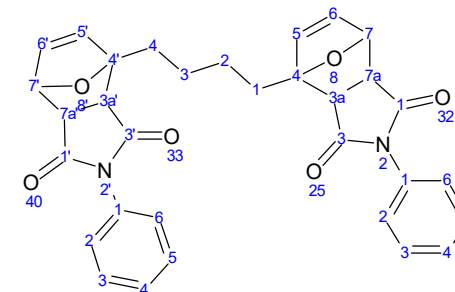

FZ-9362\_001000FID.ESP

9b

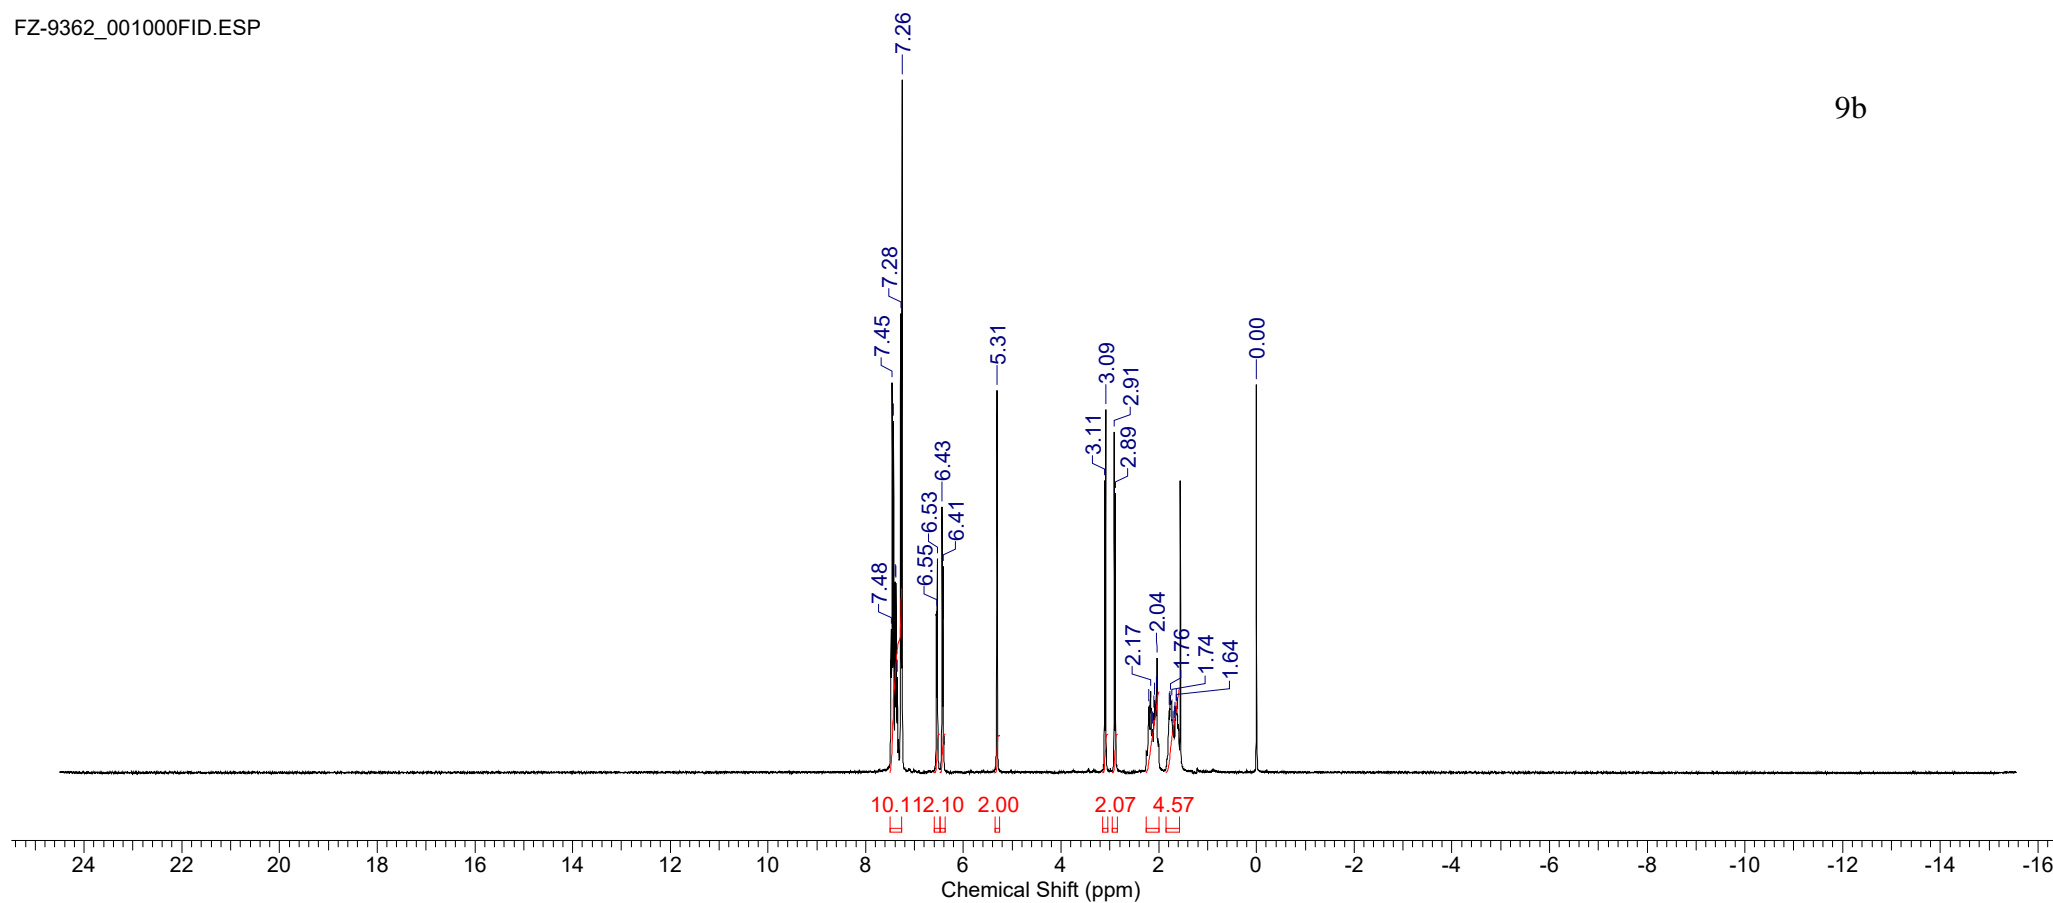

|                               |                      |                             |                                                               |                             |                      |                               |        |                              |          |
|-------------------------------|----------------------|-----------------------------|---------------------------------------------------------------|-----------------------------|----------------------|-------------------------------|--------|------------------------------|----------|
| <b>Acquisition Time (sec)</b> | 2.7263               | <b>Comment</b>              | FZ-9362                                                       | <b>Date</b>                 | 21 Dec 2020 16:51:12 |                               |        |                              |          |
| <b>Date Stamp</b>             | 21 Dec 2020 16:51:12 | <b>File Name</b>            | C:\Users\User\Desktop\Poma 21.12.20\FZ-9362\FZ-9362 001000fid |                             |                      |                               |        |                              |          |
| <b>Frequency (MHz)</b>        | 300.13               | <b>Nucleus</b>              | 1H                                                            | <b>Number of Transients</b> | 24                   | <b>Origin</b>                 | spect  | <b>Original Points Count</b> | 32768    |
| <b>Owner</b>                  | nmr                  | <b>Points Count</b>         | 32768                                                         | <b>Pulse Sequence</b>       | zg                   | <b>Receiver Gain</b>          | 202.48 | <b>SW(cyclical) (Hz)</b>     | 12019.23 |
| <b>Solvent</b>                | CHLOROFORM-d         | <b>Spectrum Offset (Hz)</b> | 1342.2964                                                     | <b>Sweep Width (Hz)</b>     | 12018.86             | <b>Temperature (degree C)</b> | 28.998 |                              |          |



FZ-9362\_001000FID.ESP

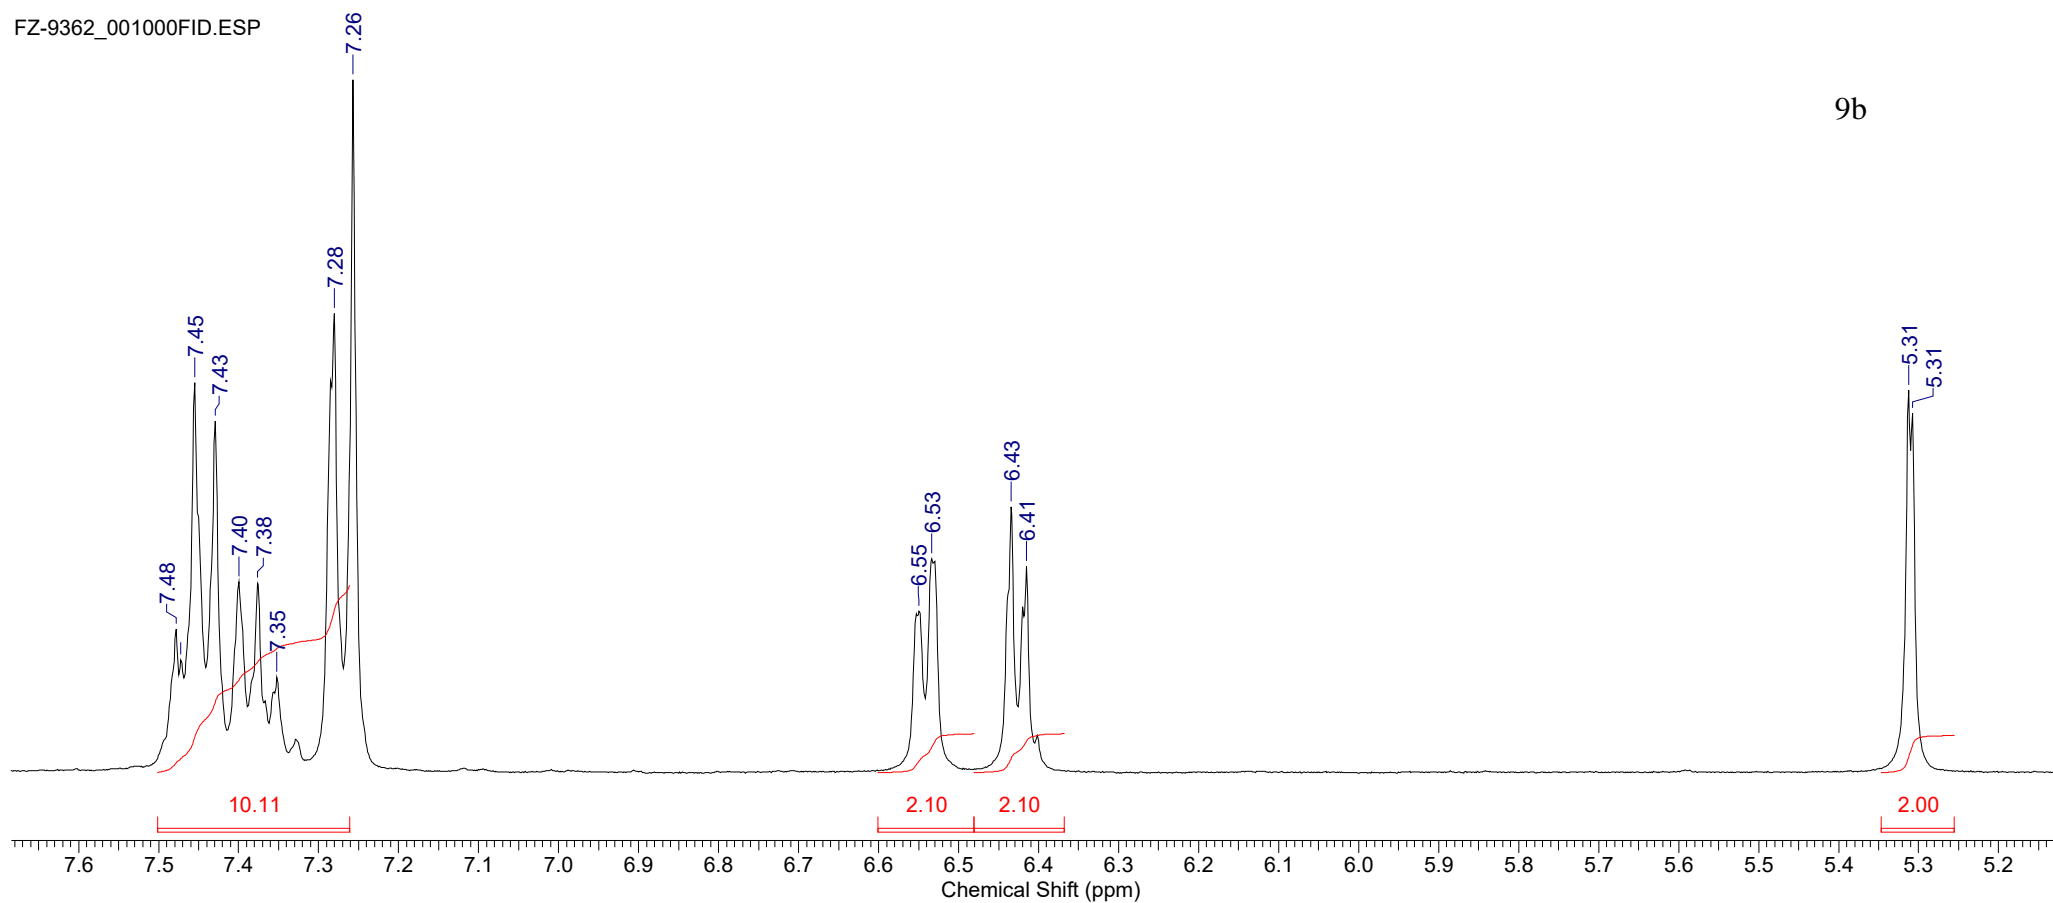

|                               |                      |                     |                             |                                                               |                         |                      |                               |                              |          |
|-------------------------------|----------------------|---------------------|-----------------------------|---------------------------------------------------------------|-------------------------|----------------------|-------------------------------|------------------------------|----------|
| <b>Acquisition Time (sec)</b> | 2.7263               | <b>Comment</b>      | FZ-9362                     | <b>Date</b>                                                   | 21 Dec 2020 16:51:12    |                      |                               |                              |          |
| <b>Date Stamp</b>             | 21 Dec 2020 16:51:12 |                     | <b>File Name</b>            | C:\Users\User\Desktop\Poma 21.12.20\FZ-9362\FZ-9362_001000fid |                         |                      |                               |                              |          |
| <b>Frequency (MHz)</b>        | 300.13               | <b>Nucleus</b>      | 1H                          | <b>Number of Transients</b>                                   | 24                      | <b>Origin</b>        | spect                         | <b>Original Points Count</b> | 32768    |
| <b>Owner</b>                  | nmr                  | <b>Points Count</b> | 32768                       | <b>Pulse Sequence</b>                                         | zg                      | <b>Receiver Gain</b> | 202.48                        | <b>SW(cyclical) (Hz)</b>     | 12019.23 |
| <b>Solvent</b>                | CHLOROFORM-d         |                     | <b>Spectrum Offset (Hz)</b> | 1342.2964                                                     | <b>Sweep Width (Hz)</b> | 12018.86             | <b>Temperature (degree C)</b> | 28.998                       |          |



FZ-9362\_001000FID.ESP

9b

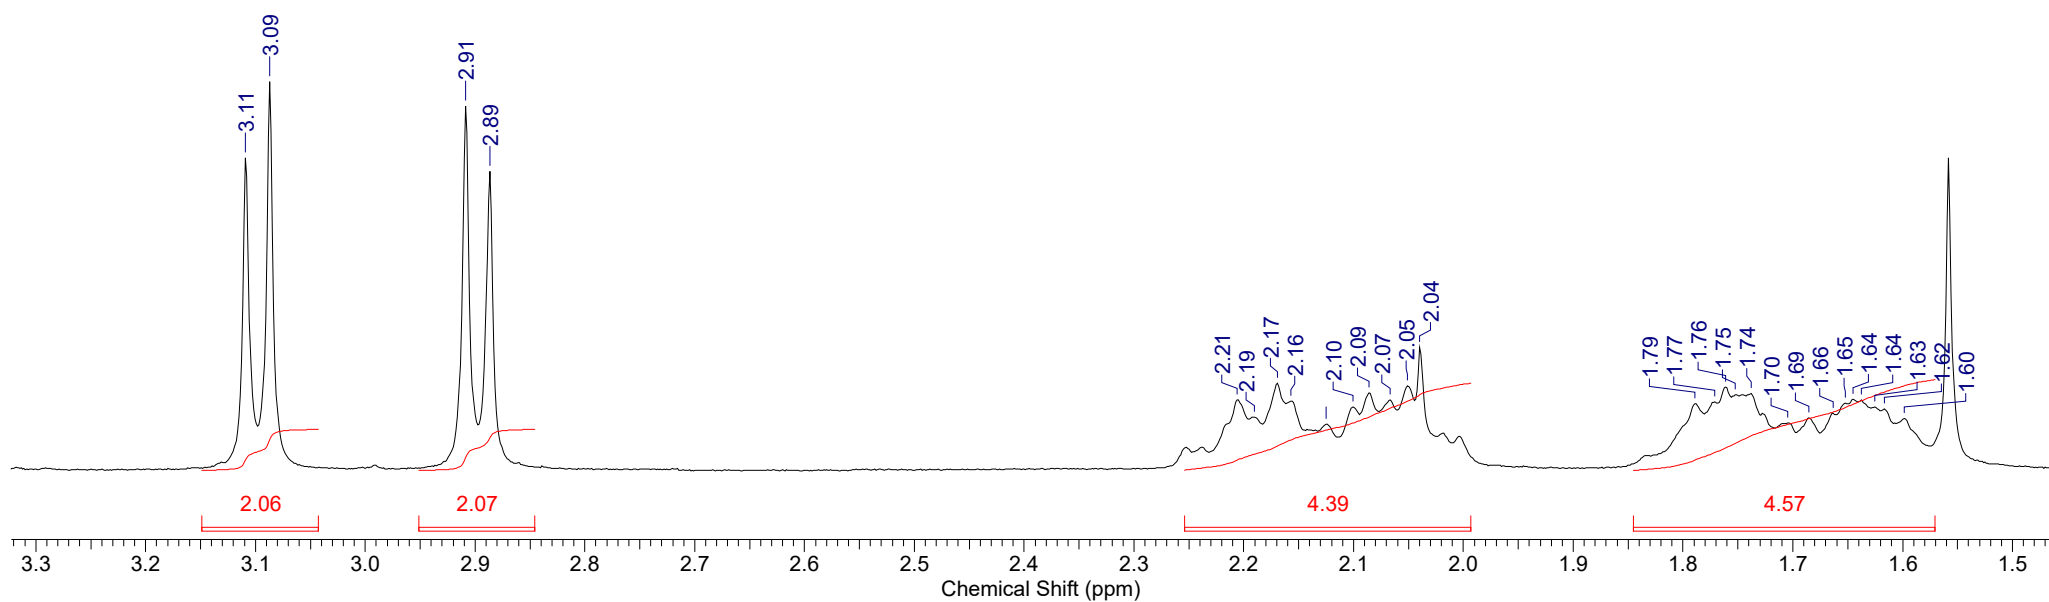

|                               |                      |                             |                                               |                               |                      |                          |              |
|-------------------------------|----------------------|-----------------------------|-----------------------------------------------|-------------------------------|----------------------|--------------------------|--------------|
| <b>Acquisition Time (sec)</b> | 0.9339               | <b>Comment</b>              | FZ-9362-C13dec                                | <b>Date</b>                   | 24 Dec 2020 11:07:44 |                          |              |
| <b>Date Stamp</b>             | 24 Dec 2020 11:07:44 | <b>File Name</b>            | C:\USERS\LIZA \DESKTOP\FZ-9362-C13DEC_013001r | <b>Frequency (MHz)</b>        | 75.47                |                          |              |
| <b>Nucleus</b>                | 13C                  | <b>Number of Transients</b> | 648                                           | <b>Origin</b>                 | spect                | <b>Owner</b>             | nmr          |
| <b>Points Count</b>           | 131072               | <b>Pulse Sequence</b>       | zgpg                                          | <b>Receiver Gain</b>          | 202.48               | <b>SW(cyclical) (Hz)</b> | 26315.79     |
| <b>Spectrum Offset (Hz)</b>   | 7546.7729            | <b>Sweep Width (Hz)</b>     | 26315.59                                      | <b>Temperature (degree C)</b> | 29.020               |                          |              |
|                               |                      |                             |                                               |                               |                      | <b>Solvent</b>           | CHLOROFORM-d |

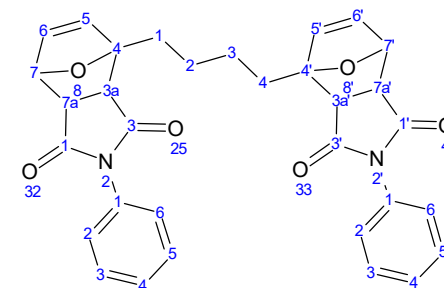

9b

FZ-9362-C13DEC\_013001r

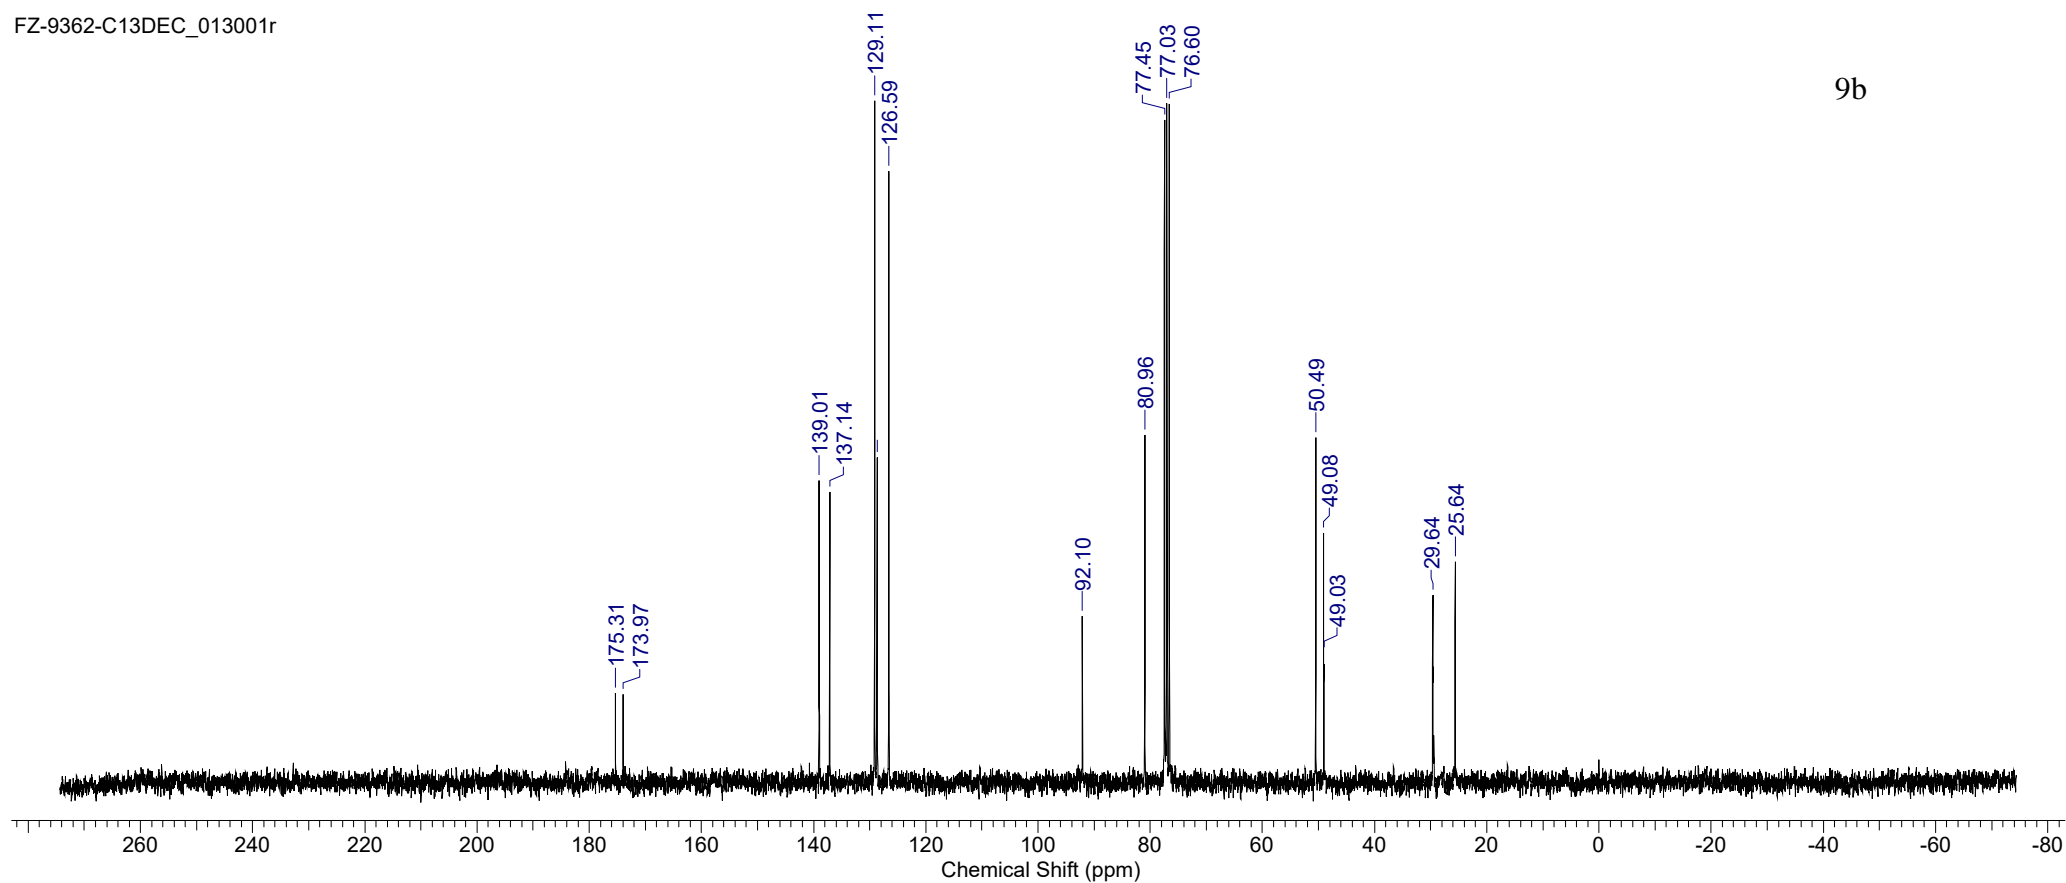

|                               |                      |                             |                                               |                               |                      |                              |          |                |              |
|-------------------------------|----------------------|-----------------------------|-----------------------------------------------|-------------------------------|----------------------|------------------------------|----------|----------------|--------------|
| <b>Acquisition Time (sec)</b> | 0.9339               | <b>Comment</b>              | FZ-9362-C13dec                                | <b>Date</b>                   | 24 Dec 2020 11:07:44 |                              |          |                |              |
| <b>Date Stamp</b>             | 24 Dec 2020 11:07:44 | <b>File Name</b>            | C:\USERS\LIZA \DESKTOP\FZ-9362-C13DEC_013001r | <b>Frequency (MHz)</b>        | 75.47                |                              |          |                |              |
| <b>Nucleus</b>                | 13C                  | <b>Number of Transients</b> | 648                                           | <b>Origin</b>                 | spect                | <b>Original Points Count</b> | 24576    | <b>Owner</b>   | nmr          |
| <b>Points Count</b>           | 131072               | <b>Pulse Sequence</b>       | zgpg                                          | <b>Receiver Gain</b>          | 202.48               | <b>SW(cyclical) (Hz)</b>     | 26315.79 | <b>Solvent</b> | CHLOROFORM-d |
| <b>Spectrum Offset (Hz)</b>   | 7546.7729            | <b>Sweep Width (Hz)</b>     | 26315.59                                      | <b>Temperature (degree C)</b> | 29.020               |                              |          |                |              |



FZ-9362-C13DEC\_013001r

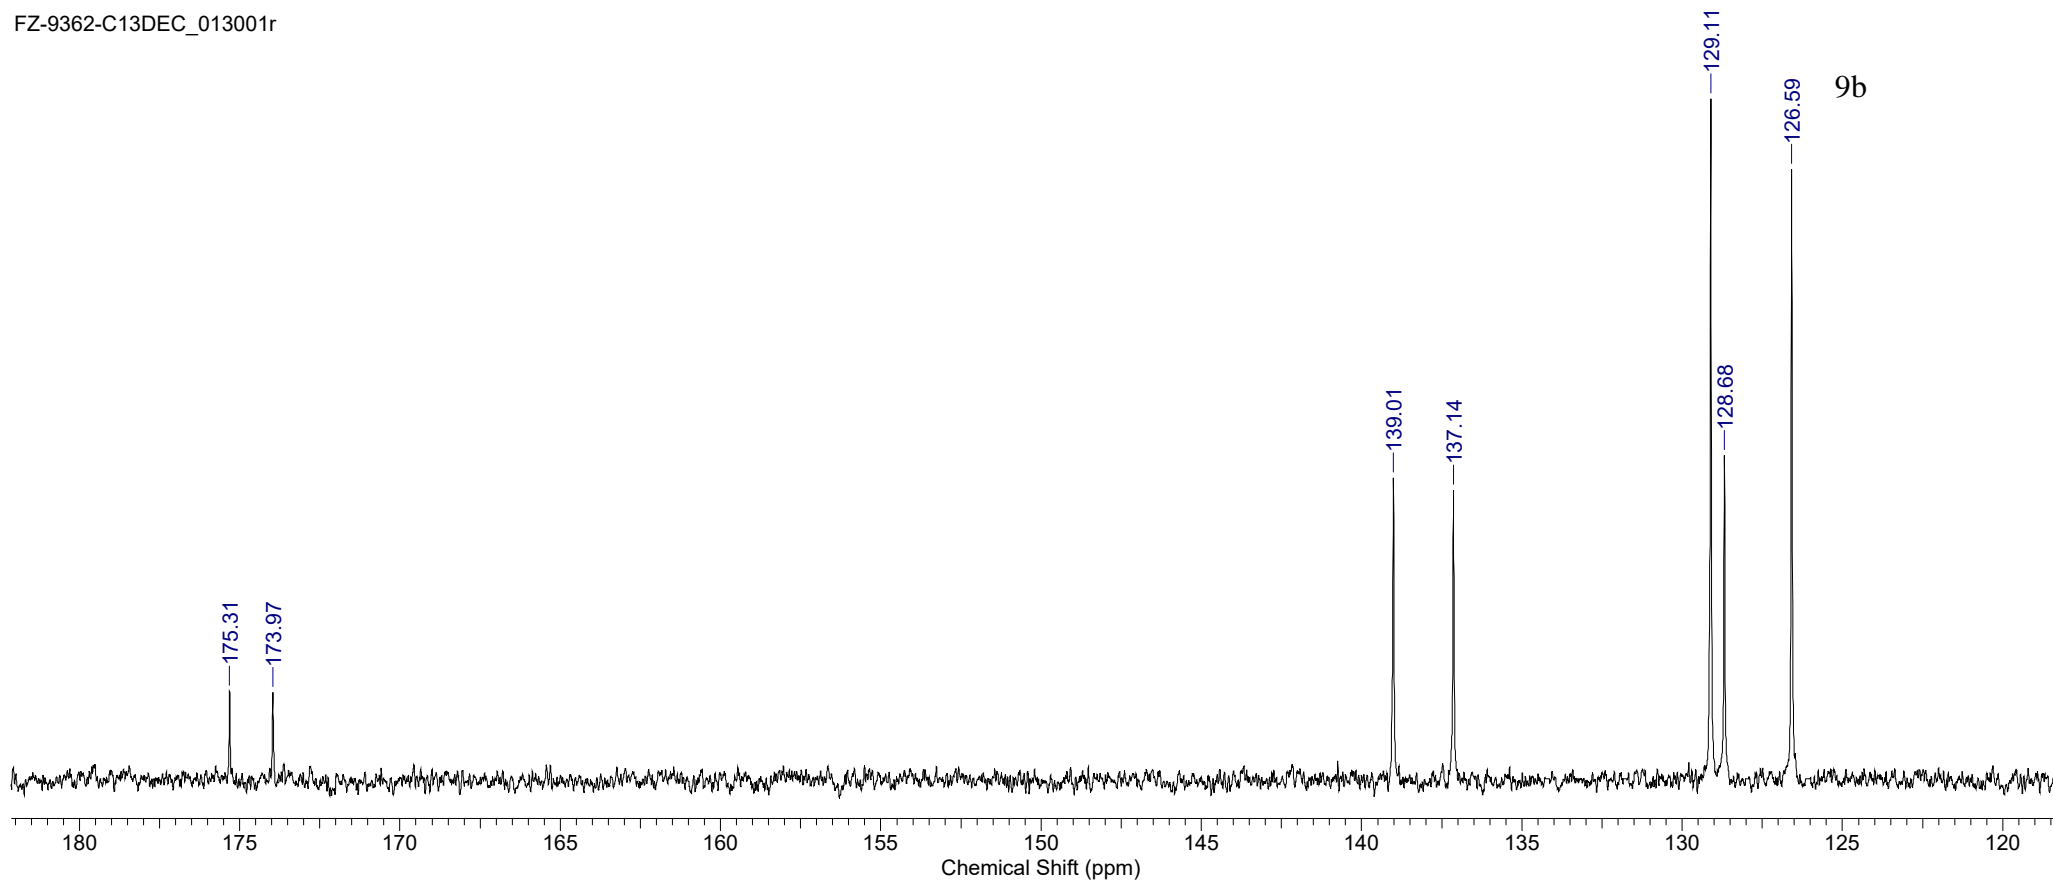

|                               |                      |                             |                                               |                               |                      |                          |          |
|-------------------------------|----------------------|-----------------------------|-----------------------------------------------|-------------------------------|----------------------|--------------------------|----------|
| <b>Acquisition Time (sec)</b> | 0.9339               | <b>Comment</b>              | FZ-9362-C13dec                                | <b>Date</b>                   | 24 Dec 2020 11:07:44 |                          |          |
| <b>Date Stamp</b>             | 24 Dec 2020 11:07:44 | <b>File Name</b>            | C:\USERS\LIZA \DESKTOP\FZ-9362-C13DEC_013001r | <b>Frequency (MHz)</b>        | 75.47                |                          |          |
| <b>Nucleus</b>                | 13C                  | <b>Number of Transients</b> | 648                                           | <b>Origin</b>                 | spect                | <b>Owner</b>             | nmr      |
| <b>Points Count</b>           | 131072               | <b>Pulse Sequence</b>       | zgpg                                          | <b>Receiver Gain</b>          | 202.48               | <b>SW(cyclical) (Hz)</b> | 26315.79 |
| <b>Spectrum Offset (Hz)</b>   | 7546.7729            | <b>Sweep Width (Hz)</b>     | 26315.59                                      | <b>Temperature (degree C)</b> | 29.020               |                          |          |



9b

FZ-9362-C13DEC\_013001r

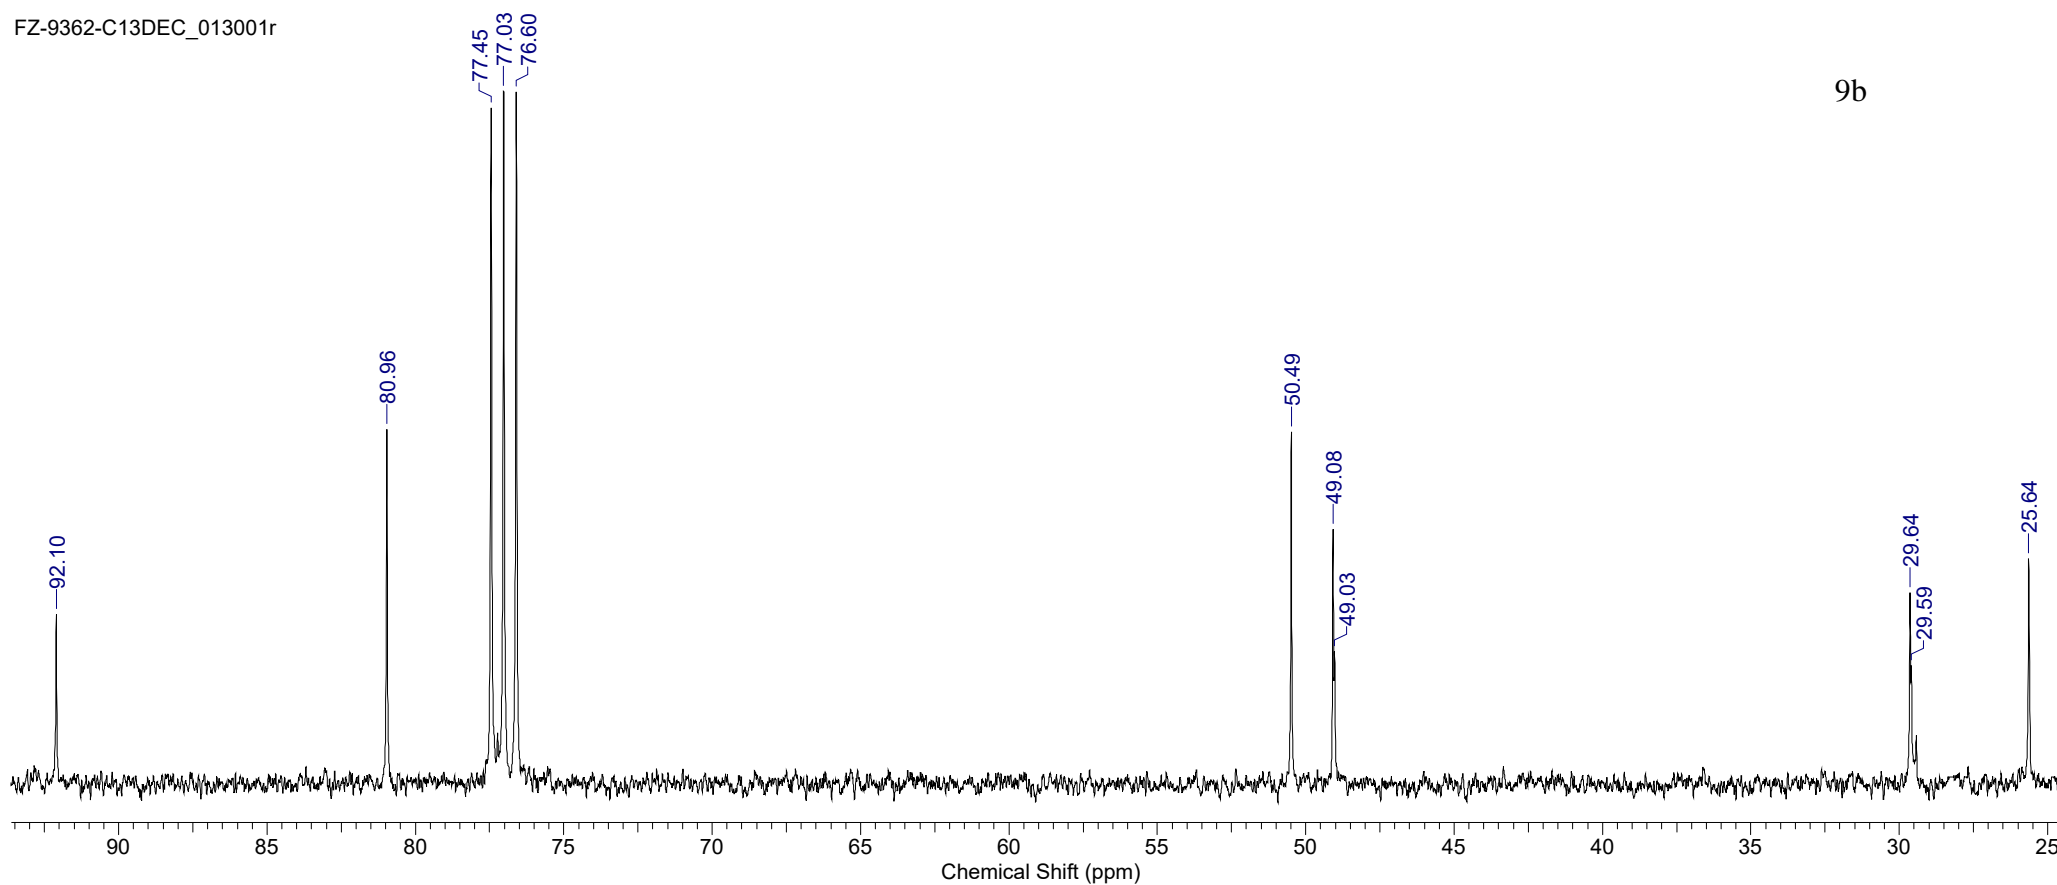

|                                                                |                    |
|----------------------------------------------------------------|--------------------|
| <b>Formula</b> C <sub>18</sub> H <sub>19</sub> NO <sub>6</sub> | <b>FW</b> 345.3466 |
|----------------------------------------------------------------|--------------------|

|                                                              |                                    |                                       |                                        |
|--------------------------------------------------------------|------------------------------------|---------------------------------------|----------------------------------------|
| <b>Acquisition Time (sec)</b> 1.9818                         | <b>Comment</b> single_pulse        | <b>Date</b> 21 Aug 2020 09:52:57      | <b>Date Stamp</b> 21 Aug 2020 09:54:05 |
| <b>File Name</b> C:\USERS\Лабa534\DOWNLOADS\FZ9032-1 (1).JDF | <b>Frequency (MHz)</b> 600.17      | <b>Nucleus</b> 1H                     | <b>Number of Transients</b> 8          |
| <b>Origin</b> ECA 600                                        | <b>Original Points Count</b> 32768 | <b>Owner</b> CKP                      | <b>Pulse Sequence</b> single_pulse.ex2 |
| <b>Receiver Gain</b> 44.00                                   | <b>Solvent</b> CHLOROFORM-d        | <b>Spectrum Offset (Hz)</b> 5412.1411 | <b>Sweep Width (Hz)</b> 16534.39       |

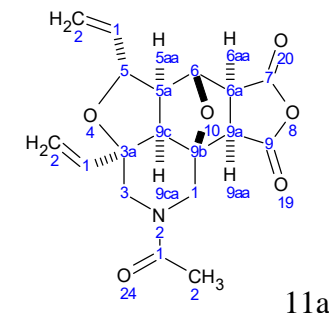

FZ9032-1 (1).JDF

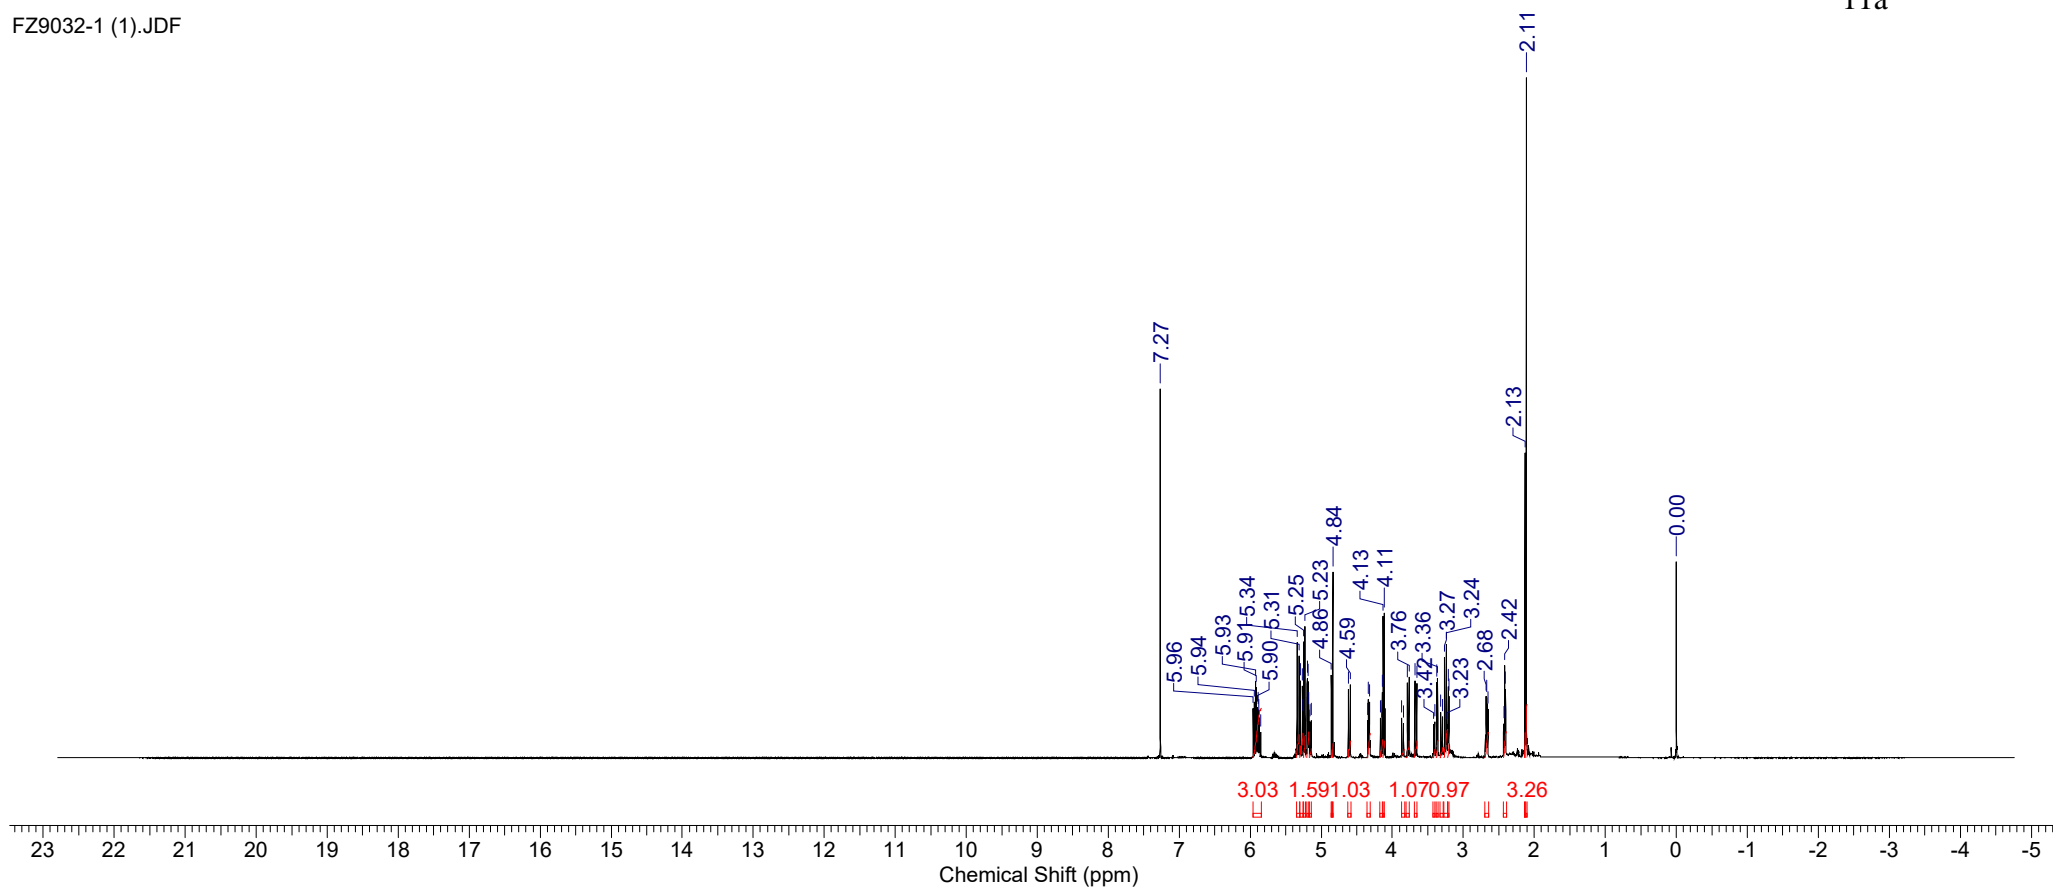



|                                                                |                    |
|----------------------------------------------------------------|--------------------|
| <b>Formula</b> C <sub>18</sub> H <sub>19</sub> NO <sub>6</sub> | <b>FW</b> 345.3466 |
|----------------------------------------------------------------|--------------------|

|                                                              |                                    |                                       |                                        |
|--------------------------------------------------------------|------------------------------------|---------------------------------------|----------------------------------------|
| <b>Acquisition Time (sec)</b> 1.9818                         | <b>Comment</b> single_pulse        | <b>Date</b> 21 Aug 2020 09:52:57      | <b>Date Stamp</b> 21 Aug 2020 09:54:05 |
| <b>File Name</b> C:\USERS\Лабa534\DOWNLOADS\FZ9032-1 (1).JDF | <b>Frequency (MHz)</b> 600.17      | <b>Nucleus</b> 1H                     | <b>Number of Transients</b> 8          |
| <b>Origin</b> ECA 600                                        | <b>Original Points Count</b> 32768 | <b>Owner</b> CKP                      | <b>Pulse Sequence</b> single_pulse.ex2 |
| <b>Receiver Gain</b> 44.00                                   | <b>Solvent</b> CHLOROFORM-d        | <b>Spectrum Offset (Hz)</b> 5412.1411 | <b>Sweep Width (Hz)</b> 16534.39       |

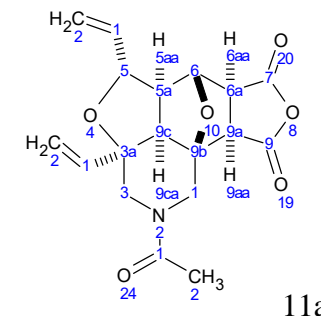

FZ9032-1 (1).JDF

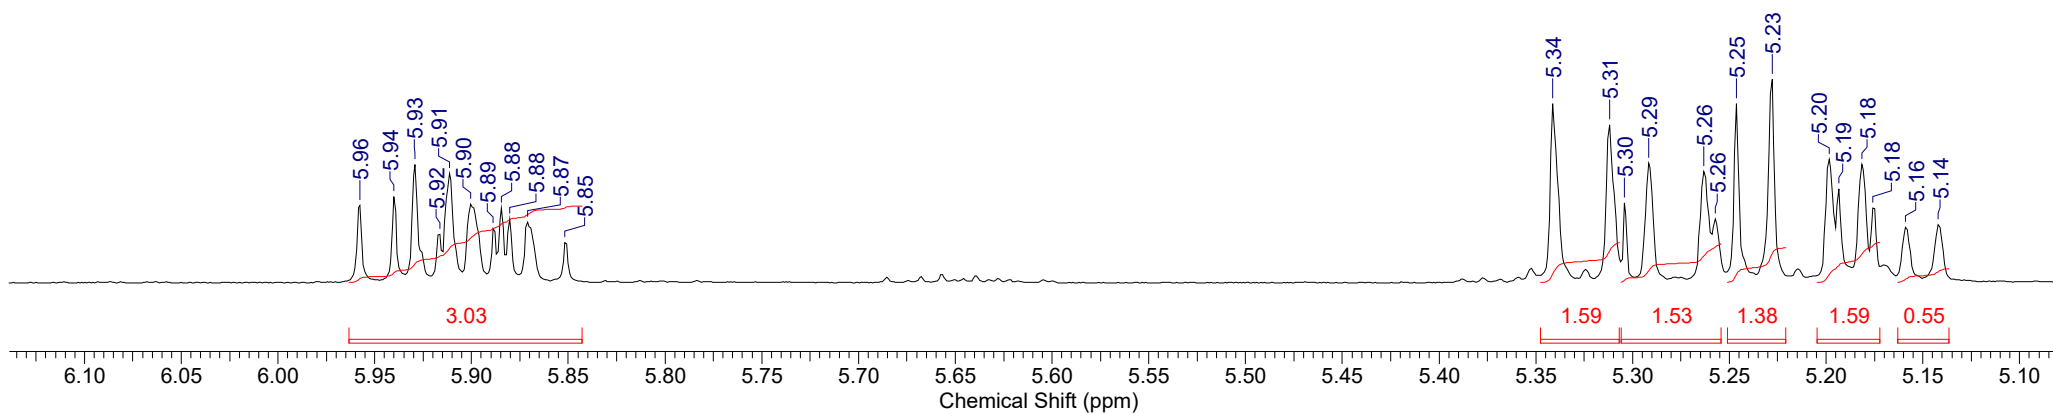

|                                                                |                    |
|----------------------------------------------------------------|--------------------|
| <b>Formula</b> C <sub>18</sub> H <sub>19</sub> NO <sub>6</sub> | <b>FW</b> 345.3466 |
|----------------------------------------------------------------|--------------------|

|                                                              |                                    |                                       |                                        |
|--------------------------------------------------------------|------------------------------------|---------------------------------------|----------------------------------------|
| <b>Acquisition Time (sec)</b> 1.9818                         | <b>Comment</b> single_pulse        | <b>Date</b> 21 Aug 2020 09:52:57      | <b>Date Stamp</b> 21 Aug 2020 09:54:05 |
| <b>File Name</b> C:\USERS\Лабa534\DOWNLOADS\FZ9032-1 (1).JDF | <b>Frequency (MHz)</b> 600.17      | <b>Nucleus</b> 1H                     | <b>Number of Transients</b> 8          |
| <b>Origin</b> ECA 600                                        | <b>Original Points Count</b> 32768 | <b>Owner</b> CKP                      | <b>Pulse Sequence</b> single_pulse.ex2 |
| <b>Receiver Gain</b> 44.00                                   | <b>Solvent</b> CHLOROFORM-d        | <b>Spectrum Offset (Hz)</b> 5412.1411 | <b>Sweep Width (Hz)</b> 16534.39       |

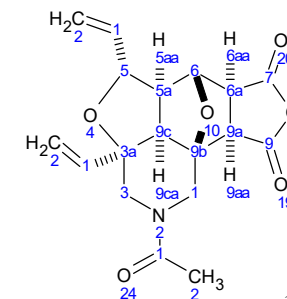

11a

FZ9032-1 (1).JDF

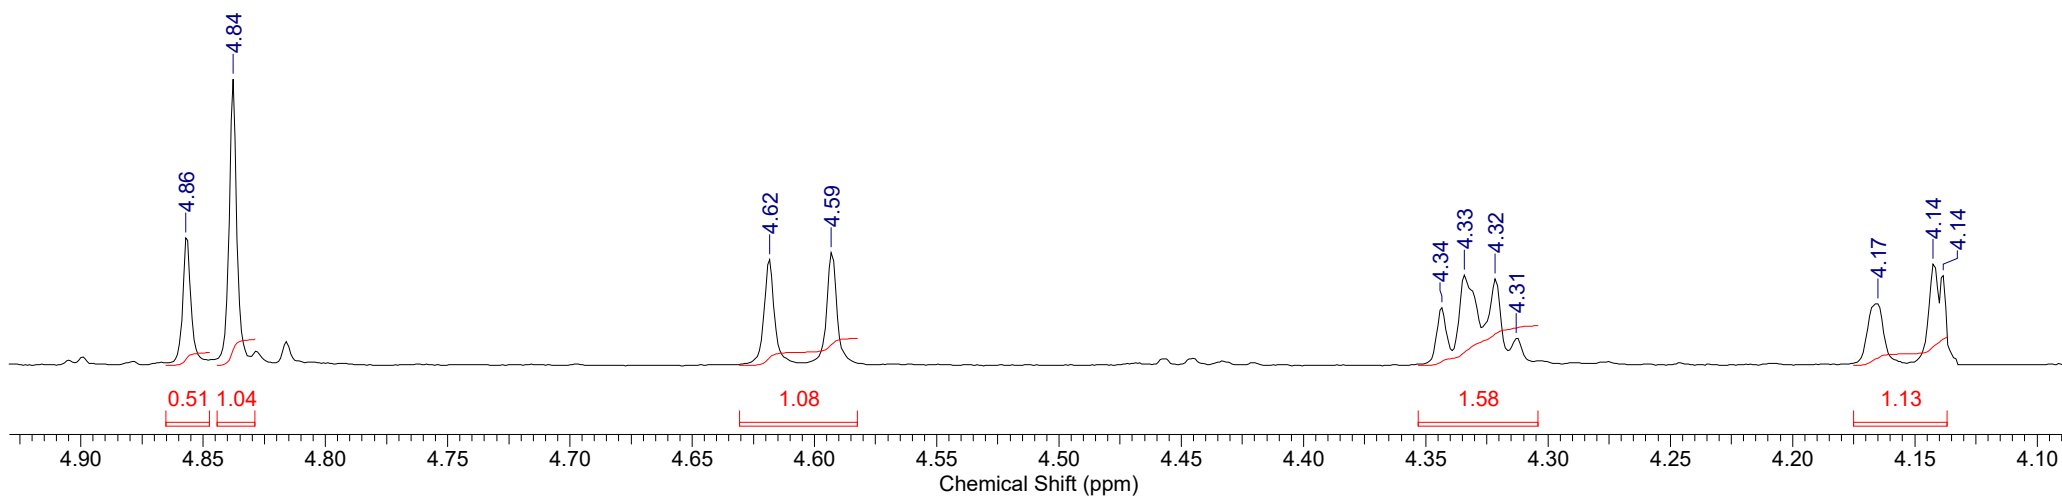

|                                                                |                    |
|----------------------------------------------------------------|--------------------|
| <b>Formula</b> C <sub>18</sub> H <sub>19</sub> NO <sub>6</sub> | <b>FW</b> 345.3466 |
|----------------------------------------------------------------|--------------------|

|                                                              |                                    |                                       |                                        |
|--------------------------------------------------------------|------------------------------------|---------------------------------------|----------------------------------------|
| <b>Acquisition Time (sec)</b> 1.9818                         | <b>Comment</b> single_pulse        | <b>Date</b> 21 Aug 2020 09:52:57      | <b>Date Stamp</b> 21 Aug 2020 09:54:05 |
| <b>File Name</b> C:\USERS\Лабa534\DOWNLOADS\FZ9032-1 (1).JDF | <b>Frequency (MHz)</b> 600.17      | <b>Nucleus</b> 1H                     | <b>Number of Transients</b> 8          |
| <b>Origin</b> ECA 600                                        | <b>Original Points Count</b> 32768 | <b>Owner</b> CKP                      | <b>Pulse Sequence</b> single_pulse.ex2 |
| <b>Receiver Gain</b> 44.00                                   | <b>Solvent</b> CHLOROFORM-d        | <b>Spectrum Offset (Hz)</b> 5412.1411 | <b>Sweep Width (Hz)</b> 16534.39       |

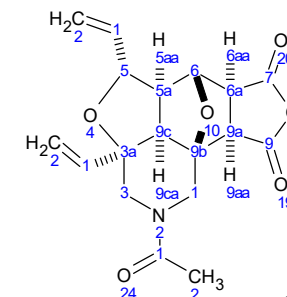

11a

FZ9032-1 (1).JDF

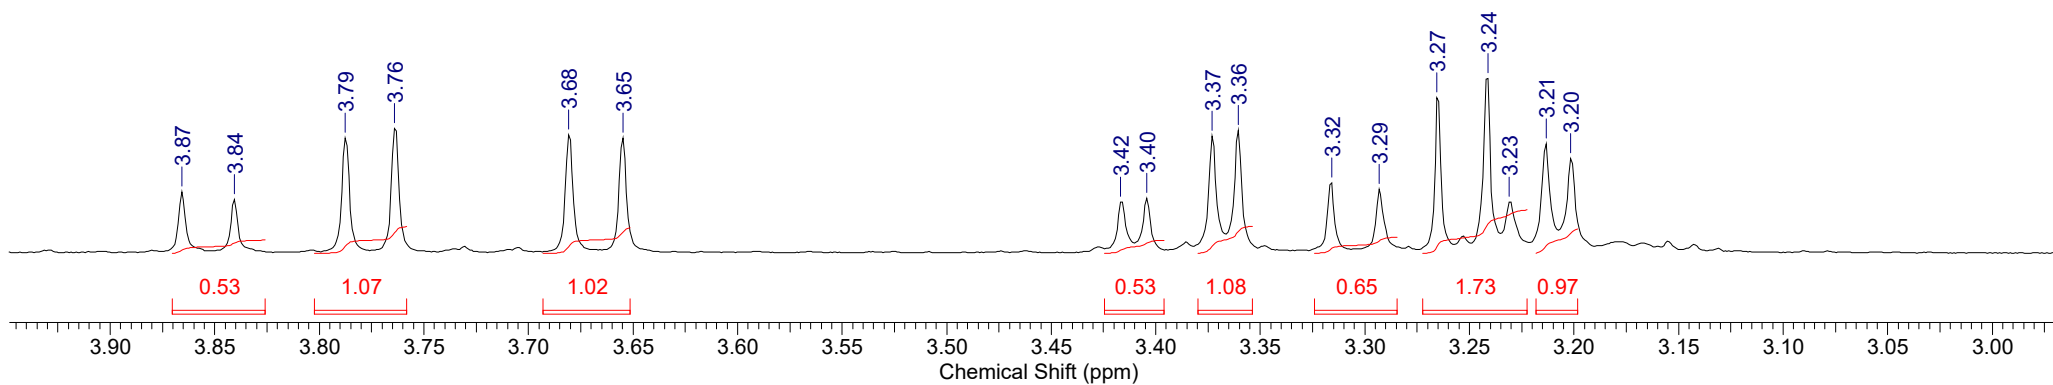

|                                                                |                    |
|----------------------------------------------------------------|--------------------|
| <b>Formula</b> C <sub>18</sub> H <sub>19</sub> NO <sub>6</sub> | <b>FW</b> 345.3466 |
|----------------------------------------------------------------|--------------------|

|                                                              |                                    |                                       |                                        |
|--------------------------------------------------------------|------------------------------------|---------------------------------------|----------------------------------------|
| <b>Acquisition Time (sec)</b> 1.9818                         | <b>Comment</b> single_pulse        | <b>Date</b> 21 Aug 2020 09:52:57      | <b>Date Stamp</b> 21 Aug 2020 09:54:05 |
| <b>File Name</b> C:\USERS\Лабa534\DOWNLOADS\FZ9032-1 (1).JDF | <b>Frequency (MHz)</b> 600.17      | <b>Nucleus</b> 1H                     | <b>Number of Transients</b> 8          |
| <b>Origin</b> ECA 600                                        | <b>Original Points Count</b> 32768 | <b>Owner</b> CKP                      | <b>Pulse Sequence</b> single_pulse.ex2 |
| <b>Receiver Gain</b> 44.00                                   | <b>Solvent</b> CHLOROFORM-d        | <b>Spectrum Offset (Hz)</b> 5412.1411 | <b>Sweep Width (Hz)</b> 16534.39       |

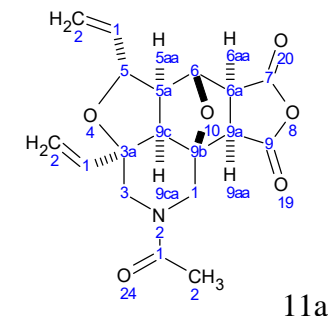

FZ9032-1 (1).JDF

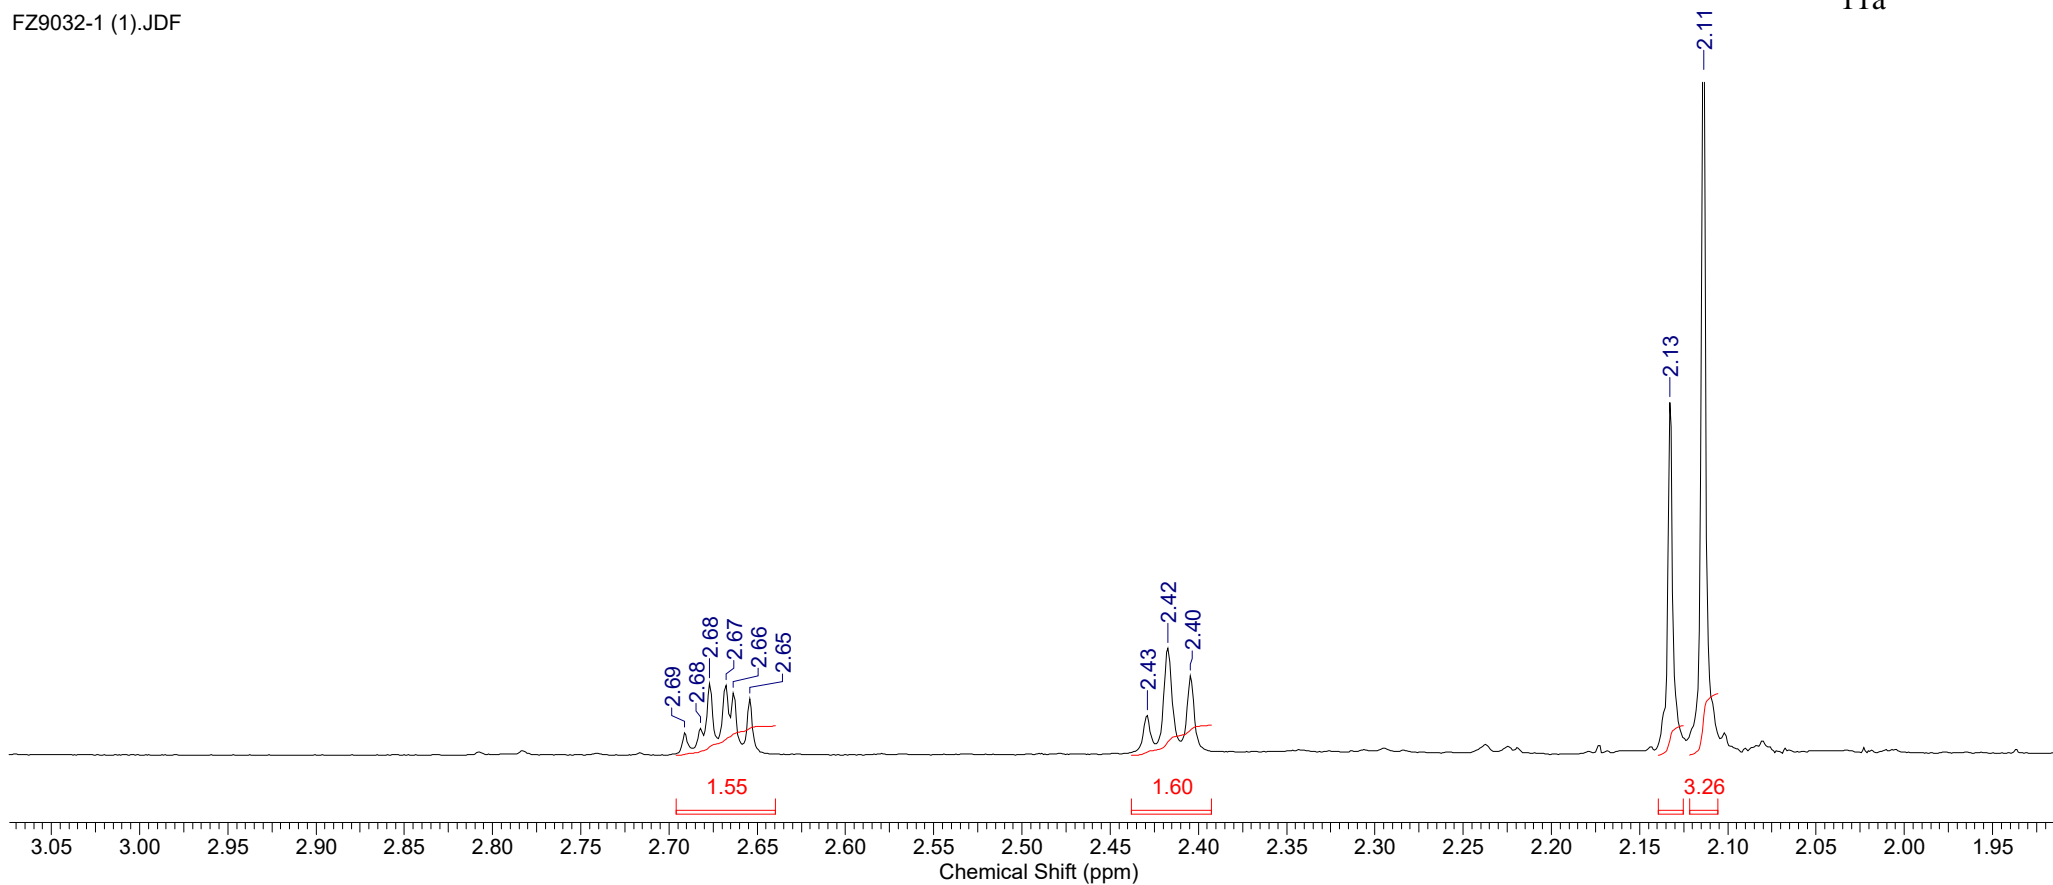

|                                                                |                    |
|----------------------------------------------------------------|--------------------|
| <b>Formula</b> C <sub>18</sub> H <sub>19</sub> NO <sub>6</sub> | <b>FW</b> 345.3466 |
|----------------------------------------------------------------|--------------------|

|                                        |                                                          |                                        |
|----------------------------------------|----------------------------------------------------------|----------------------------------------|
| <b>Acquisition Time (sec)</b> 0.6921   | <b>Comment</b> single pulse decoupled gated NOE          | <b>Date</b> 24 Aug 2020 10:25:24       |
| <b>Date Stamp</b> 24 Aug 2020 10:26:38 | <b>File Name</b> C:\USERS\la6a534\DOWNLOADS\FZ9032-2.JDF |                                        |
| <b>Frequency (MHz)</b> 150.91          | <b>Nucleus</b> 13C                                       | <b>Number of Transients</b> 2000       |
| <b>Original Points Count</b> 32768     | <b>Owner</b> CKP                                         | <b>Points Count</b> 32768              |
| <b>Receiver Gain</b> 58.00             | <b>Solvent</b> CHLOROFORM-d                              | <b>Pulse Sequence</b> single pulse dec |
| <b>Sweep Width (Hz)</b> 47348.49       |                                                          | <b>Spectrum Offset (Hz)</b> 15091.3428 |

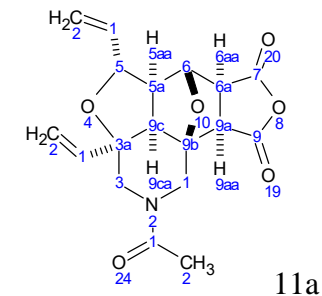

FZ9032-2.JDF

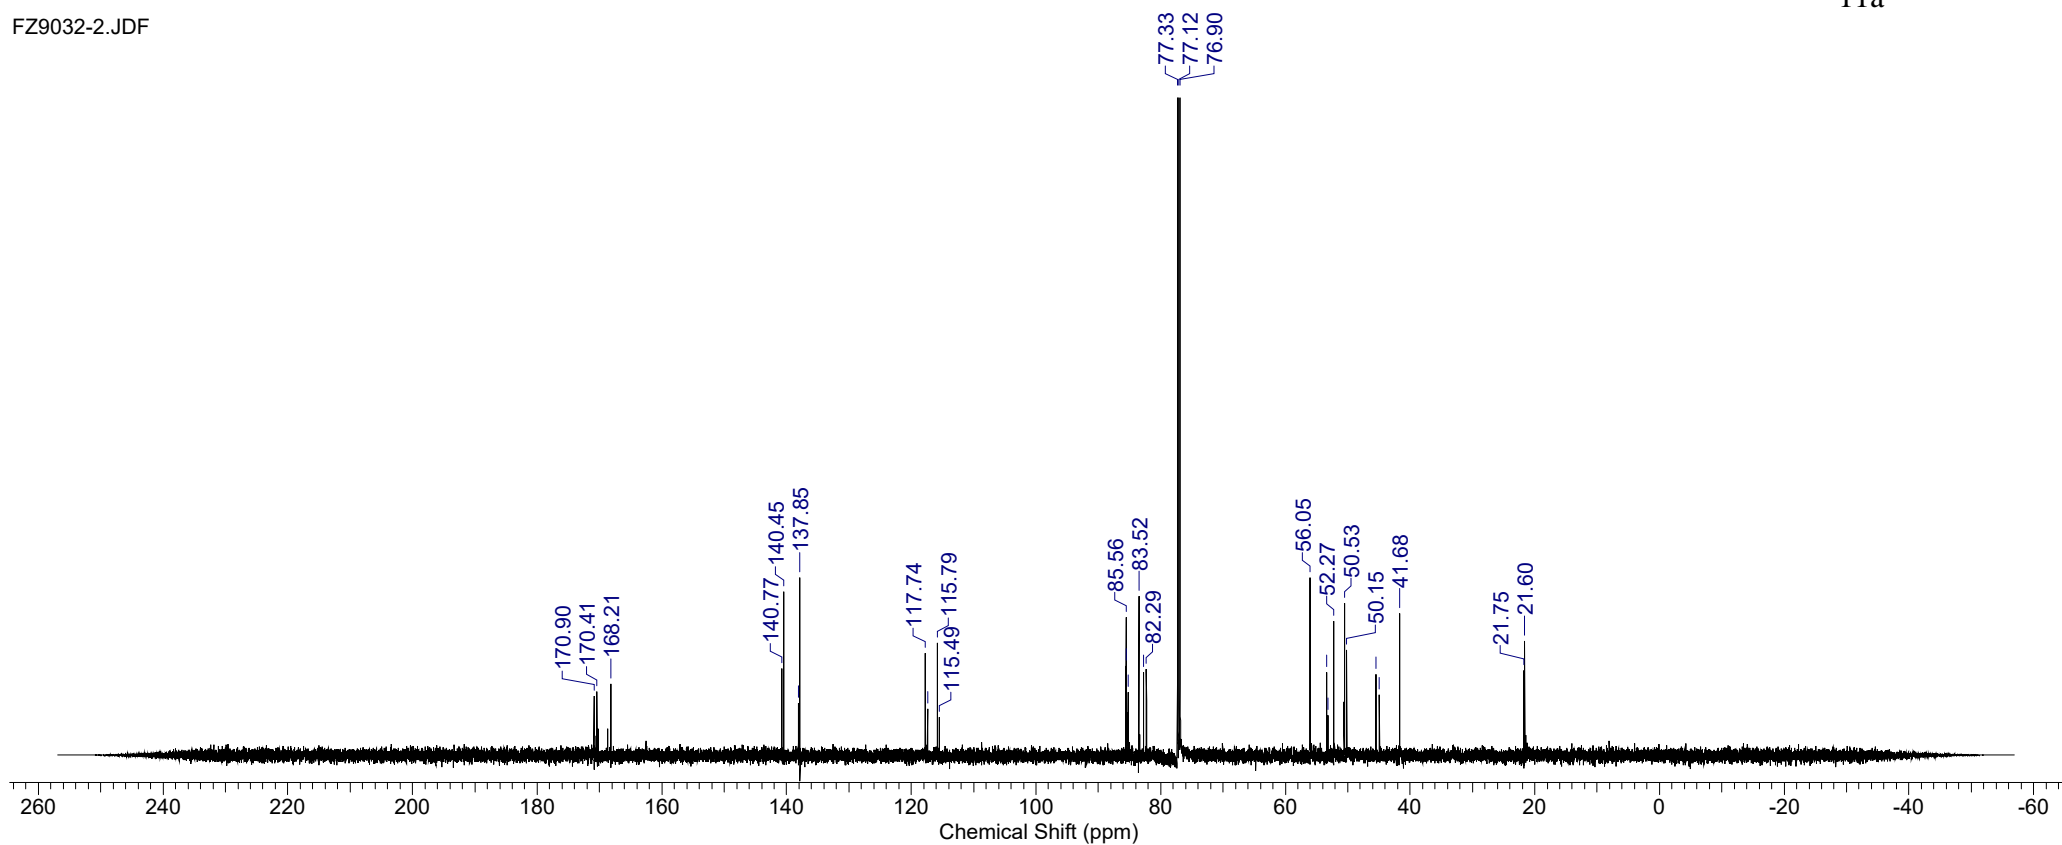

|                                                                |                    |
|----------------------------------------------------------------|--------------------|
| <b>Formula</b> C <sub>18</sub> H <sub>19</sub> NO <sub>6</sub> | <b>FW</b> 345.3466 |
|----------------------------------------------------------------|--------------------|

|                                        |                                                           |                                        |
|----------------------------------------|-----------------------------------------------------------|----------------------------------------|
| <b>Acquisition Time (sec)</b> 0.6921   | <b>Comment</b> single pulse decoupled gated NOE           | <b>Date</b> 24 Aug 2020 10:25:24       |
| <b>Date Stamp</b> 24 Aug 2020 10:26:38 | <b>File Name</b> C:\USERS\l1a6a534\DOWNLOADS\FZ9032-2.JDF |                                        |
| <b>Frequency (MHz)</b> 150.91          | <b>Nucleus</b> 13C                                        | <b>Number of Transients</b> 2000       |
| <b>Original Points Count</b> 32768     | <b>Owner</b> CKP                                          | <b>Points Count</b> 32768              |
| <b>Receiver Gain</b> 58.00             | <b>Solvent</b> CHLOROFORM-d                               | <b>Pulse Sequence</b> single pulse dec |
| <b>Sweep Width (Hz)</b> 47348.49       |                                                           | <b>Spectrum Offset (Hz)</b> 15091.3428 |

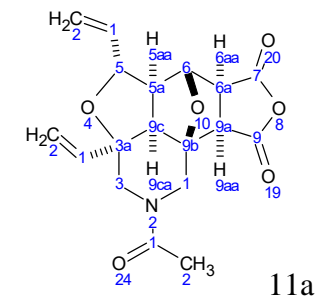

FZ9032-2.JDF

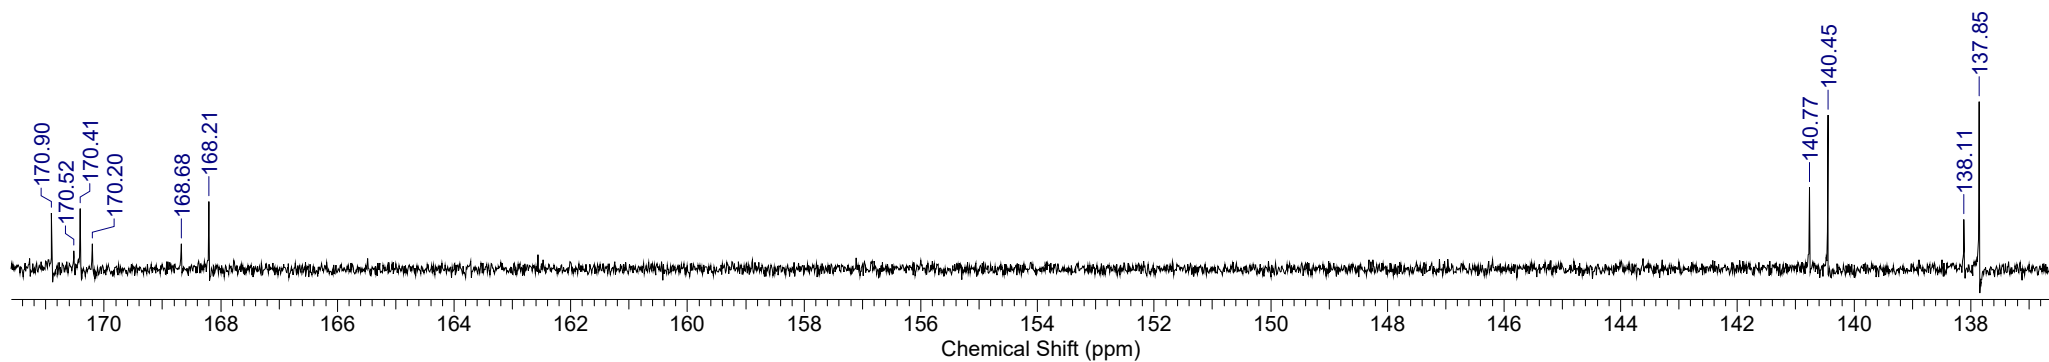

|                                                                |                    |
|----------------------------------------------------------------|--------------------|
| <b>Formula</b> C <sub>18</sub> H <sub>19</sub> NO <sub>6</sub> | <b>FW</b> 345.3466 |
|----------------------------------------------------------------|--------------------|

|                                        |                                                           |                                        |
|----------------------------------------|-----------------------------------------------------------|----------------------------------------|
| <b>Acquisition Time (sec)</b> 0.6921   | <b>Comment</b> single pulse decoupled gated NOE           | <b>Date</b> 24 Aug 2020 10:25:24       |
| <b>Date Stamp</b> 24 Aug 2020 10:26:38 | <b>File Name</b> C:\USERS\l1a6a534\DOWNLOADS\FZ9032-2.JDF |                                        |
| <b>Frequency (MHz)</b> 150.91          | <b>Nucleus</b> 13C                                        | <b>Number of Transients</b> 2000       |
| <b>Original Points Count</b> 32768     | <b>Owner</b> CKP                                          | <b>Points Count</b> 32768              |
| <b>Receiver Gain</b> 58.00             | <b>Solvent</b> CHLOROFORM-d                               | <b>Pulse Sequence</b> single pulse dec |
| <b>Sweep Width (Hz)</b> 47348.49       |                                                           | <b>Spectrum Offset (Hz)</b> 15091.3428 |

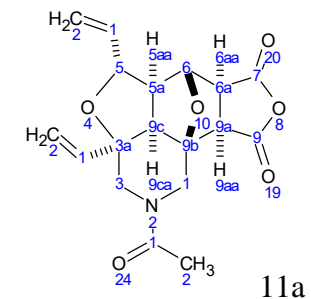

FZ9032-2.JDF

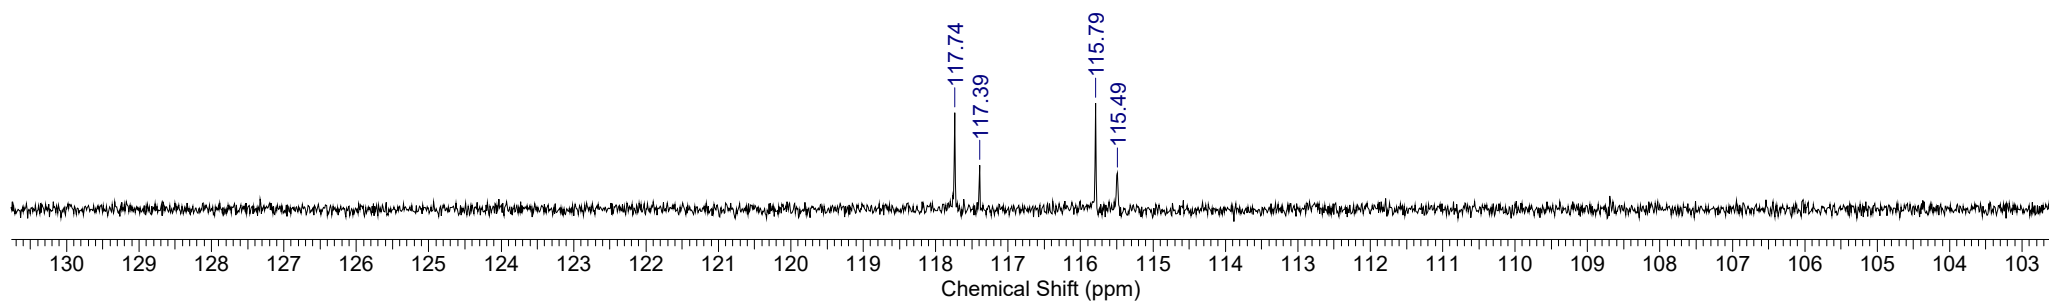

|                                                                |                    |
|----------------------------------------------------------------|--------------------|
| <b>Formula</b> C <sub>18</sub> H <sub>19</sub> NO <sub>6</sub> | <b>FW</b> 345.3466 |
|----------------------------------------------------------------|--------------------|

|                                        |                                                          |                                        |
|----------------------------------------|----------------------------------------------------------|----------------------------------------|
| <b>Acquisition Time (sec)</b> 0.6921   | <b>Comment</b> single pulse decoupled gated NOE          | <b>Date</b> 24 Aug 2020 10:25:24       |
| <b>Date Stamp</b> 24 Aug 2020 10:26:38 | <b>File Name</b> C:\USERS\la6a534\DOWNLOADS\FZ9032-2.JDF |                                        |
| <b>Frequency (MHz)</b> 150.91          | <b>Nucleus</b> 13C                                       | <b>Number of Transients</b> 2000       |
| <b>Original Points Count</b> 32768     | <b>Owner</b> CKP                                         | <b>Points Count</b> 32768              |
| <b>Receiver Gain</b> 58.00             | <b>Solvent</b> CHLOROFORM-d                              | <b>Pulse Sequence</b> single_pulse_dec |
| <b>Sweep Width (Hz)</b> 47348.49       |                                                          | <b>Spectrum Offset (Hz)</b> 15091.3428 |

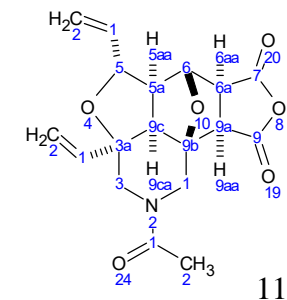

FZ9032-2.JDF

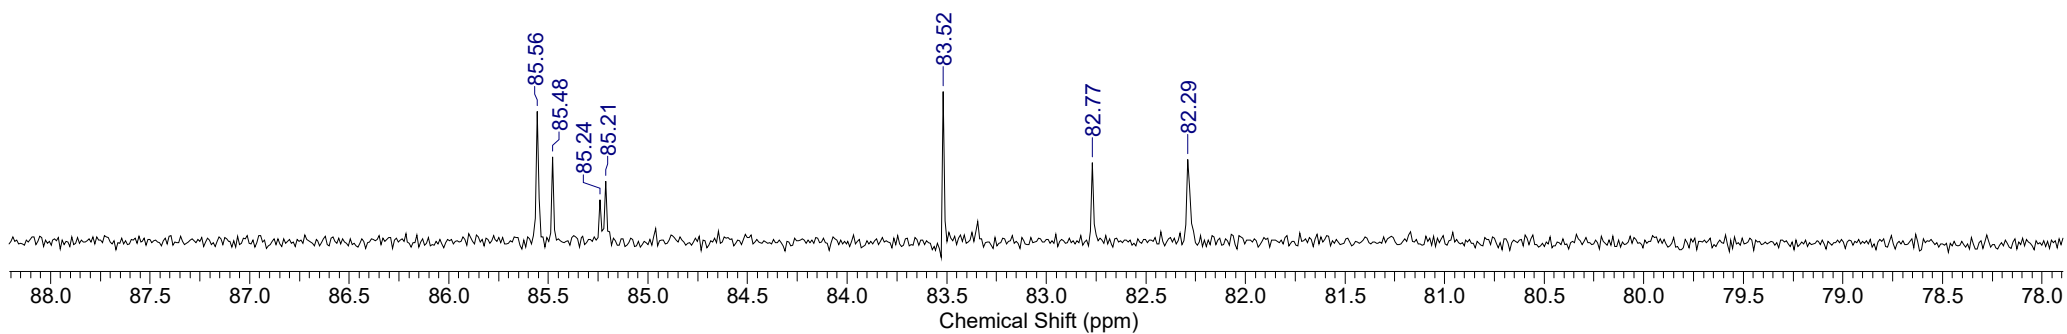



|                                                                |                    |
|----------------------------------------------------------------|--------------------|
| <b>Formula</b> C <sub>18</sub> H <sub>19</sub> NO <sub>6</sub> | <b>FW</b> 345.3466 |
|----------------------------------------------------------------|--------------------|

|                                        |                                                          |                                        |
|----------------------------------------|----------------------------------------------------------|----------------------------------------|
| <b>Acquisition Time (sec)</b> 0.6921   | <b>Comment</b> single pulse decoupled gated NOE          | <b>Date</b> 24 Aug 2020 10:25:24       |
| <b>Date Stamp</b> 24 Aug 2020 10:26:38 | <b>File Name</b> C:\USERS\1a6a534\DOWNLOADS\FZ9032-2.JDF |                                        |
| <b>Frequency (MHz)</b> 150.91          | <b>Nucleus</b> 13C                                       | <b>Number of Transients</b> 2000       |
| <b>Original Points Count</b> 32768     | <b>Owner</b> CKP                                         | <b>Points Count</b> 32768              |
| <b>Receiver Gain</b> 58.00             | <b>Solvent</b> CHLOROFORM-d                              | <b>Pulse Sequence</b> single pulse dec |
| <b>Sweep Width (Hz)</b> 47348.49       |                                                          | <b>Spectrum Offset (Hz)</b> 15091.3428 |

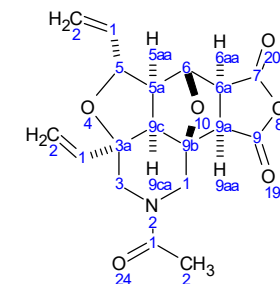

11a

FZ9032-2.JDF

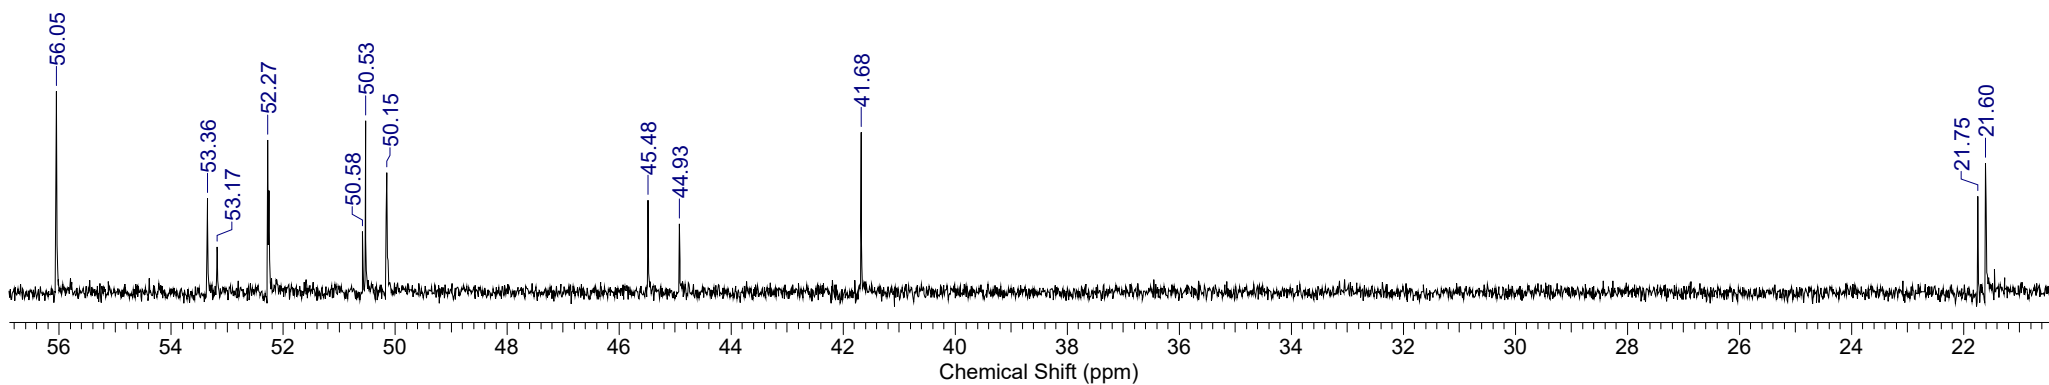

|                                                                |                    |
|----------------------------------------------------------------|--------------------|
| <b>Formula</b> C <sub>21</sub> H <sub>25</sub> NO <sub>7</sub> | <b>FW</b> 403.4257 |
|----------------------------------------------------------------|--------------------|

|                                                          |                                    |                                       |                                        |
|----------------------------------------------------------|------------------------------------|---------------------------------------|----------------------------------------|
| <b>Acquisition Time (sec)</b> 1.9818                     | <b>Comment</b> single_pulse        | <b>Date</b> 21 Aug 2020 09:57:26      | <b>Date Stamp</b> 21 Aug 2020 09:58:34 |
| <b>File Name</b> C:\USERS\Лабa534\DOWNLOADS\FZ9033-1.JDF | <b>Frequency (MHz)</b> 600.17      | <b>Nucleus</b> 1H                     | <b>Number of Transients</b> 8          |
| <b>Origin</b> ECA 600                                    | <b>Original Points Count</b> 32768 | <b>Owner</b> CKP                      | <b>Pulse Sequence</b> single_pulse.ex2 |
| <b>Receiver Gain</b> 38.00                               | <b>Solvent</b> CHLOROFORM-d        | <b>Spectrum Offset (Hz)</b> 5414.1597 | <b>Sweep Width (Hz)</b> 16534.39       |

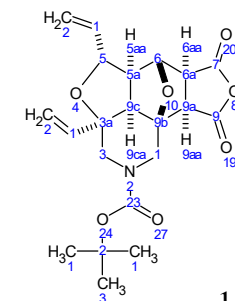

11b

FZ9033-1 PK-2-1208.ESP

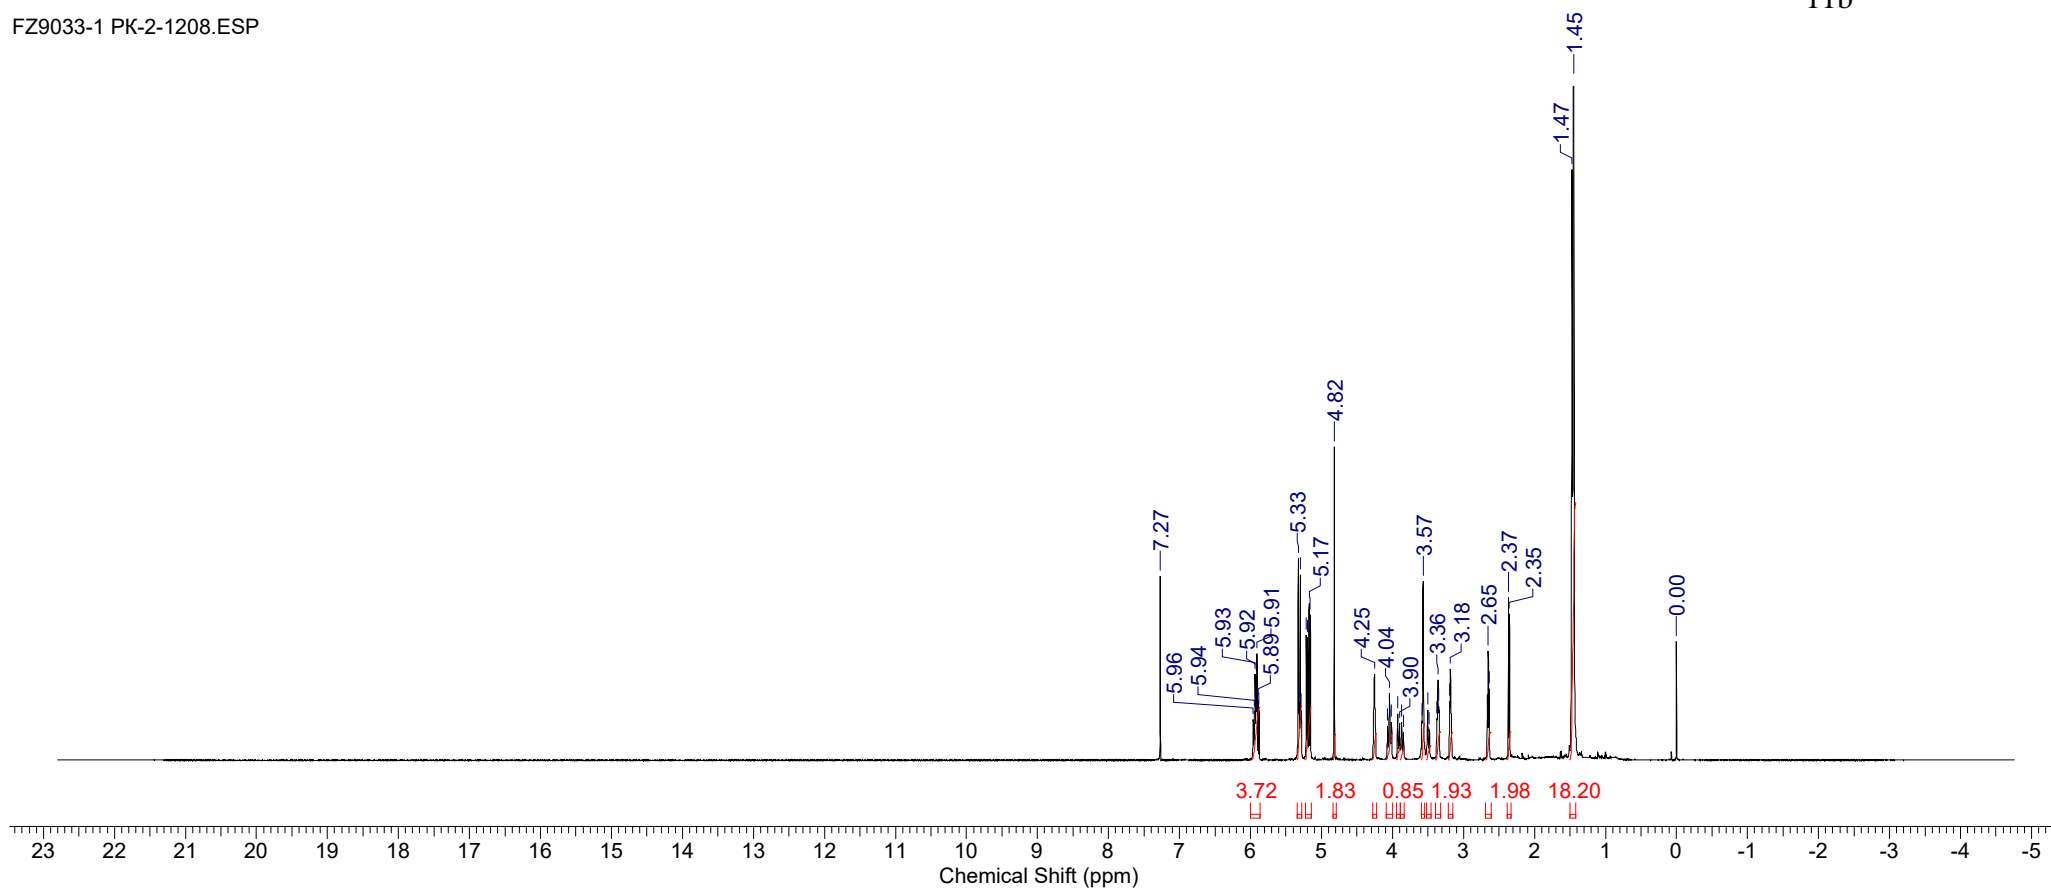

|                                                                |                    |
|----------------------------------------------------------------|--------------------|
| <b>Formula</b> C <sub>21</sub> H <sub>25</sub> NO <sub>7</sub> | <b>FW</b> 403.4257 |
|----------------------------------------------------------------|--------------------|

|                                                          |                                    |                                       |                                        |
|----------------------------------------------------------|------------------------------------|---------------------------------------|----------------------------------------|
| <b>Acquisition Time (sec)</b> 1.9818                     | <b>Comment</b> single_pulse        | <b>Date</b> 21 Aug 2020 09:57:26      | <b>Date Stamp</b> 21 Aug 2020 09:58:34 |
| <b>File Name</b> C:\USERS\Лабa534\DOWNLOADS\FZ9033-1.JDF | <b>Frequency (MHz)</b> 600.17      | <b>Nucleus</b> 1H                     | <b>Number of Transients</b> 8          |
| <b>Origin</b> ECA 600                                    | <b>Original Points Count</b> 32768 | <b>Owner</b> CKP                      | <b>Pulse Sequence</b> single_pulse.ex2 |
| <b>Receiver Gain</b> 38.00                               | <b>Solvent</b> CHLOROFORM-d        | <b>Spectrum Offset (Hz)</b> 5414.1597 | <b>Sweep Width (Hz)</b> 16534.39       |

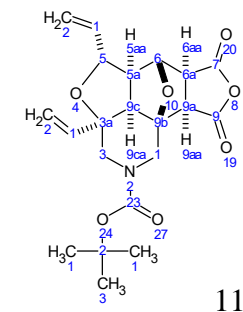

FZ9033-1 PK-2-1208.ESP

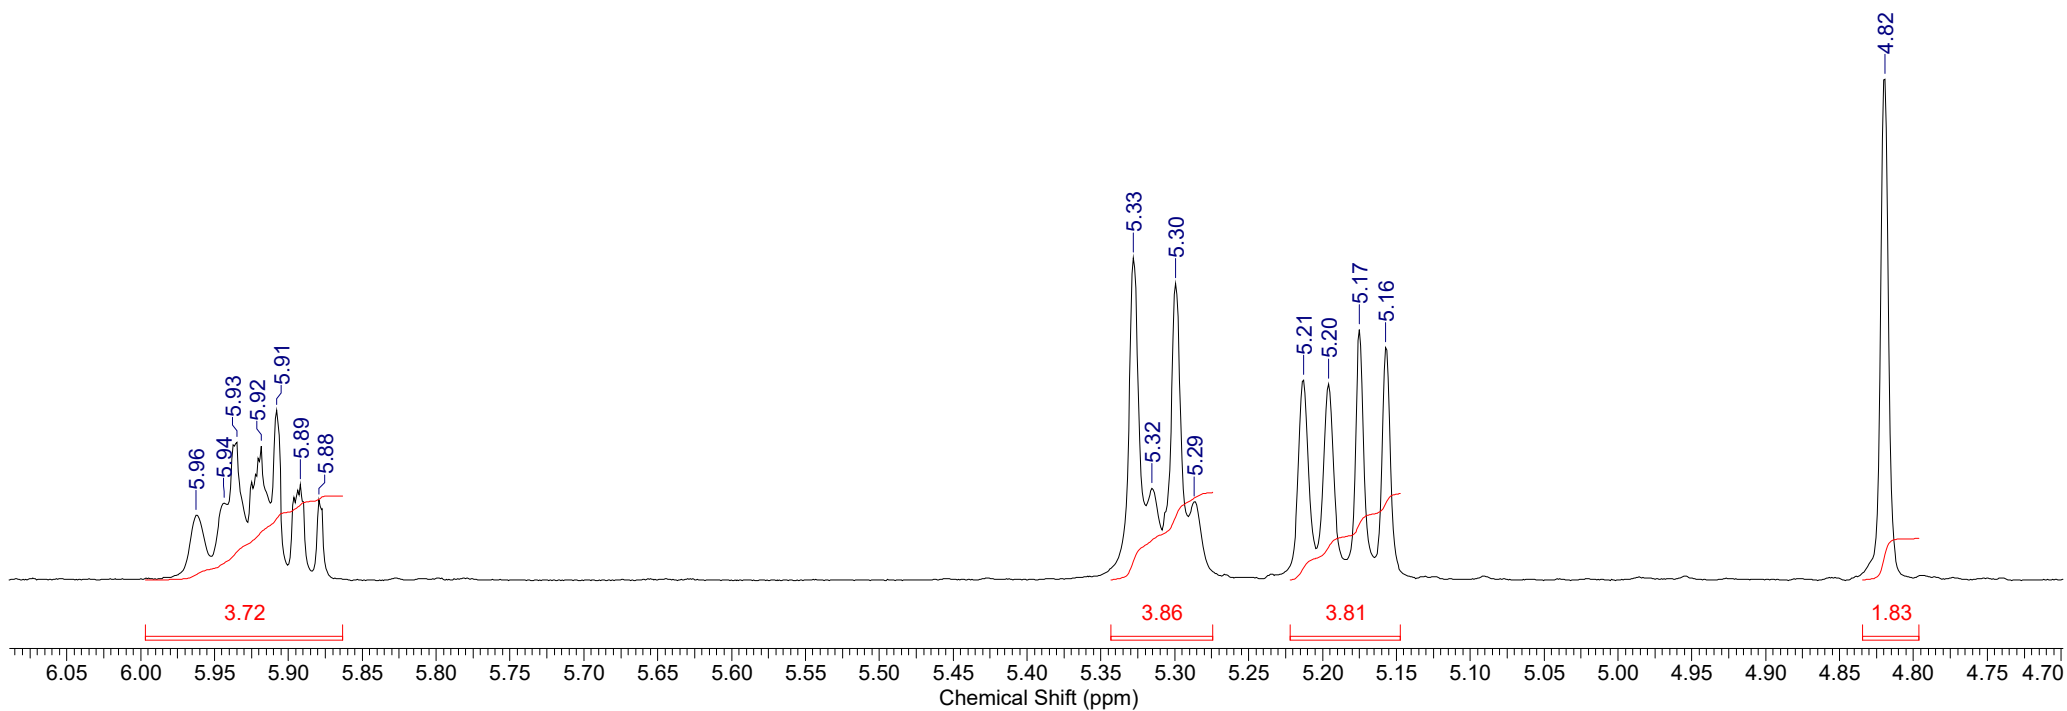

|                                                                |                    |
|----------------------------------------------------------------|--------------------|
| <b>Formula</b> C <sub>21</sub> H <sub>25</sub> NO <sub>7</sub> | <b>FW</b> 403.4257 |
|----------------------------------------------------------------|--------------------|

|                                                          |                                    |                                       |                                        |
|----------------------------------------------------------|------------------------------------|---------------------------------------|----------------------------------------|
| <b>Acquisition Time (sec)</b> 1.9818                     | <b>Comment</b> single_pulse        | <b>Date</b> 21 Aug 2020 09:57:26      | <b>Date Stamp</b> 21 Aug 2020 09:58:34 |
| <b>File Name</b> C:\USERS\Лабa534\DOWNLOADS\FZ9033-1.JDF | <b>Frequency (MHz)</b> 600.17      | <b>Nucleus</b> 1H                     | <b>Number of Transients</b> 8          |
| <b>Origin</b> ECA 600                                    | <b>Original Points Count</b> 32768 | <b>Owner</b> CKP                      | <b>Pulse Sequence</b> single_pulse.ex2 |
| <b>Receiver Gain</b> 38.00                               | <b>Solvent</b> CHLOROFORM-d        | <b>Spectrum Offset (Hz)</b> 5414.1597 | <b>Sweep Width (Hz)</b> 16534.39       |

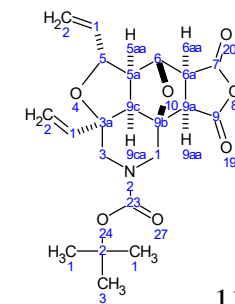

FZ9033-1 PK-2-1208.ESP

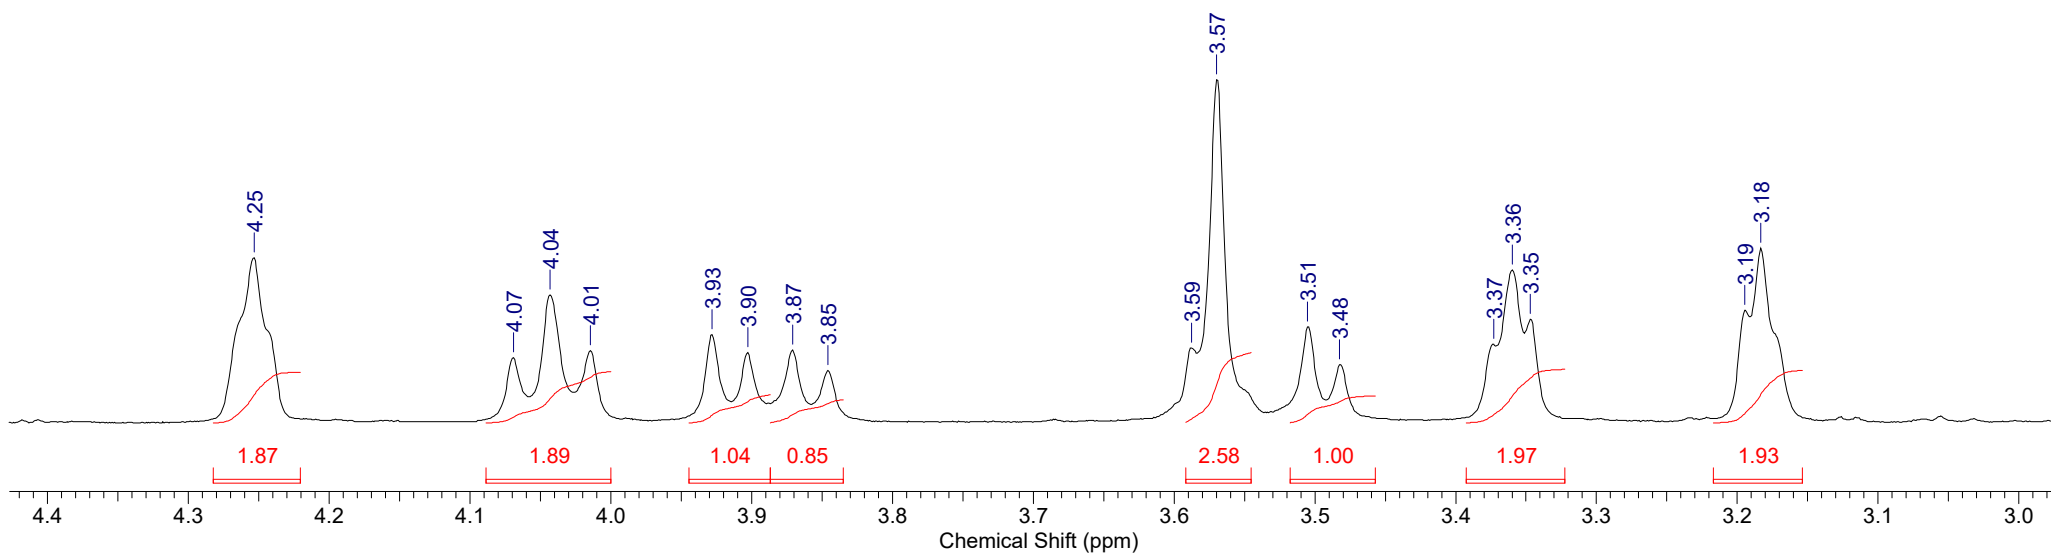

|                                                                |                    |
|----------------------------------------------------------------|--------------------|
| <b>Formula</b> C <sub>21</sub> H <sub>25</sub> NO <sub>7</sub> | <b>FW</b> 403.4257 |
|----------------------------------------------------------------|--------------------|

|                                                          |                                    |                                       |                                        |
|----------------------------------------------------------|------------------------------------|---------------------------------------|----------------------------------------|
| <b>Acquisition Time (sec)</b> 1.9818                     | <b>Comment</b> single_pulse        | <b>Date</b> 21 Aug 2020 09:57:26      | <b>Date Stamp</b> 21 Aug 2020 09:58:34 |
| <b>File Name</b> C:\USERS\Лабa534\DOWNLOADS\FZ9033-1.JDF | <b>Frequency (MHz)</b> 600.17      | <b>Nucleus</b> 1H                     | <b>Number of Transients</b> 8          |
| <b>Origin</b> ECA 600                                    | <b>Original Points Count</b> 32768 | <b>Owner</b> CKP                      | <b>Pulse Sequence</b> single_pulse.ex2 |
| <b>Receiver Gain</b> 38.00                               | <b>Solvent</b> CHLOROFORM-d        | <b>Spectrum Offset (Hz)</b> 5414.1597 | <b>Sweep Width (Hz)</b> 16534.39       |



FZ9033-1 PK-2-1208.ESP

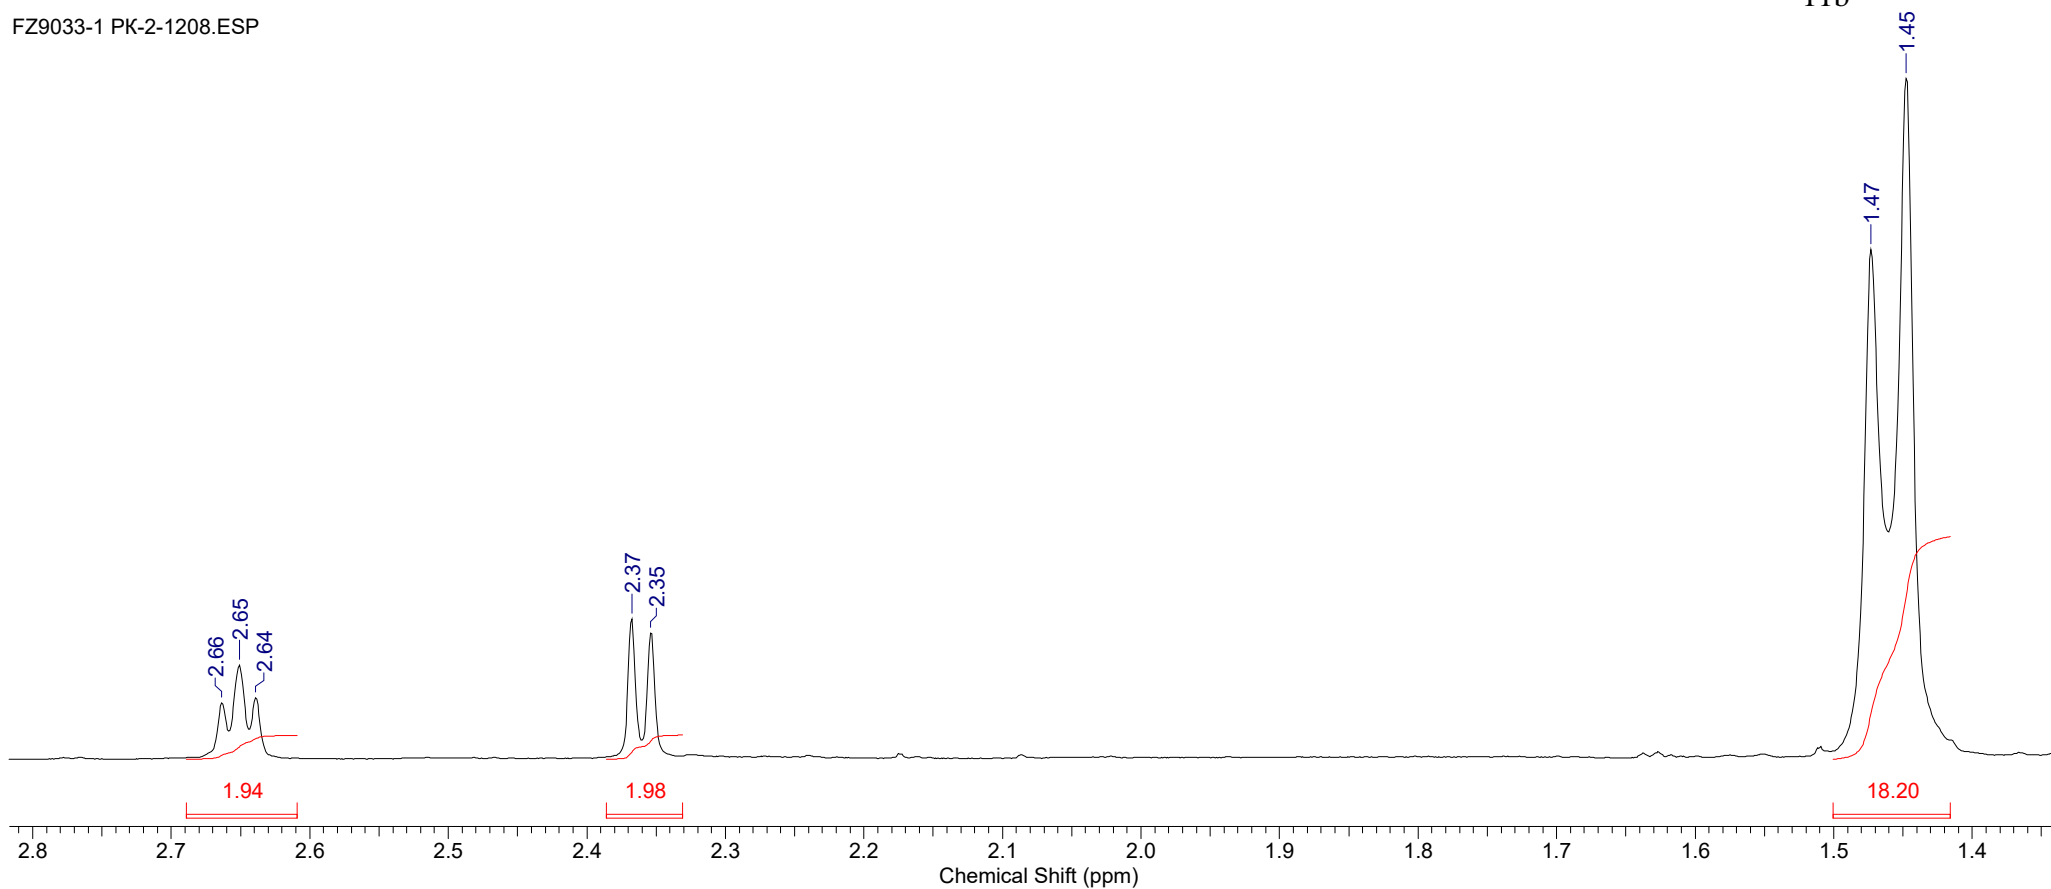

|                                                                |                    |
|----------------------------------------------------------------|--------------------|
| <b>Formula</b> C <sub>21</sub> H <sub>25</sub> NO <sub>7</sub> | <b>FW</b> 403.4257 |
|----------------------------------------------------------------|--------------------|

|                                        |                                                          |                                        |
|----------------------------------------|----------------------------------------------------------|----------------------------------------|
| <b>Acquisition Time (sec)</b> 0.6921   | <b>Comment</b> single pulse decoupled gated NOE          | <b>Date</b> 24 Aug 2020 16:46:32       |
| <b>Date Stamp</b> 24 Aug 2020 16:47:46 | <b>File Name</b> C:\USERS\la6a534\DOWNLOADS\FZ9033-2.JDF |                                        |
| <b>Frequency (MHz)</b> 150.91          | <b>Nucleus</b> 13C                                       | <b>Number of Transients</b> 8000       |
| <b>Original Points Count</b> 32768     | <b>Owner</b> CKP                                         | <b>Points Count</b> 32768              |
| <b>Receiver Gain</b> 58.00             | <b>Solvent</b> CHLOROFORM-d                              | <b>Pulse Sequence</b> single pulse dec |
| <b>Sweep Width (Hz)</b> 47348.49       |                                                          | <b>Spectrum Offset (Hz)</b> 15079.3525 |

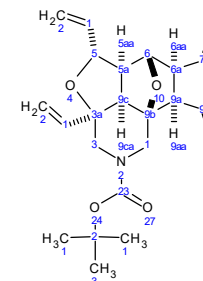

11b

FZ9033-2.JDF

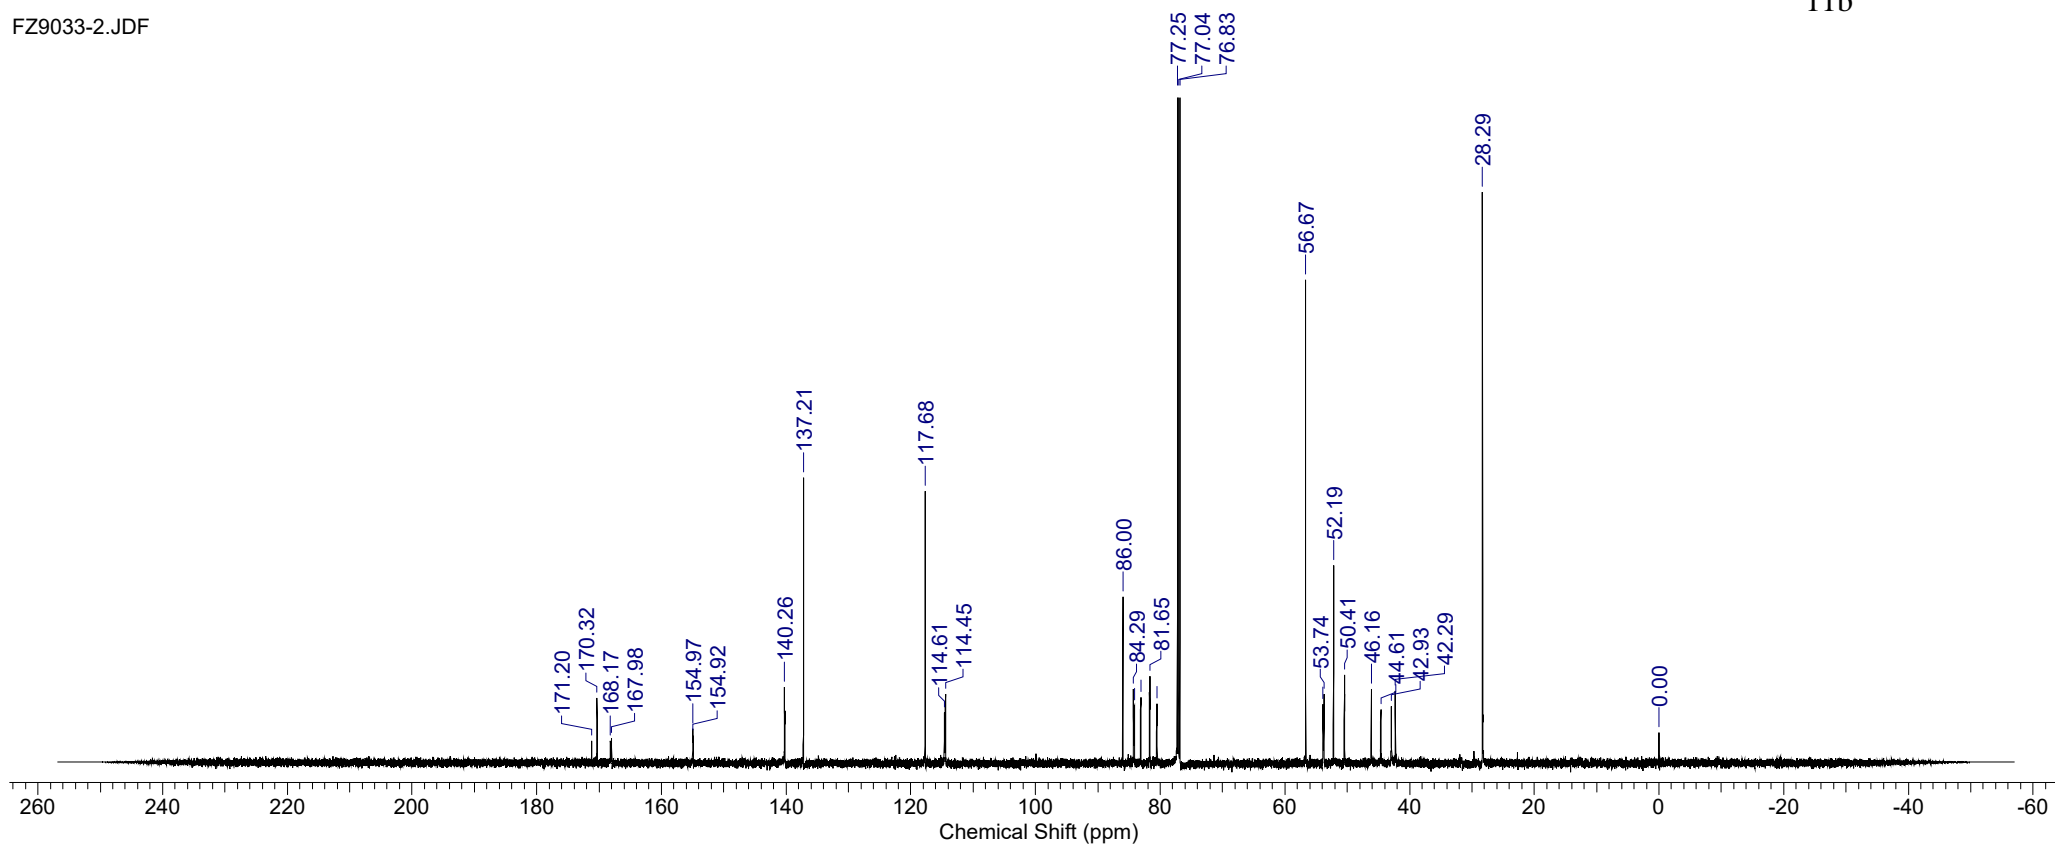

|                                                                |                    |
|----------------------------------------------------------------|--------------------|
| <b>Formula</b> C <sub>21</sub> H <sub>25</sub> NO <sub>7</sub> | <b>FW</b> 403.4257 |
|----------------------------------------------------------------|--------------------|

|                                        |                                                          |                                        |
|----------------------------------------|----------------------------------------------------------|----------------------------------------|
| <b>Acquisition Time (sec)</b> 0.6921   | <b>Comment</b> single pulse decoupled gated NOE          | <b>Date</b> 24 Aug 2020 16:46:32       |
| <b>Date Stamp</b> 24 Aug 2020 16:47:46 | <b>File Name</b> C:\USERS\la6a534\DOWNLOADS\FZ9033-2.JDF |                                        |
| <b>Frequency (MHz)</b> 150.91          | <b>Nucleus</b> 13C                                       | <b>Number of Transients</b> 8000       |
| <b>Original Points Count</b> 32768     | <b>Owner</b> CKP                                         | <b>Points Count</b> 32768              |
| <b>Receiver Gain</b> 58.00             | <b>Solvent</b> CHLOROFORM-d                              | <b>Pulse Sequence</b> single_pulse_dec |
| <b>Sweep Width (Hz)</b> 47348.49       |                                                          | <b>Spectrum Offset (Hz)</b> 15079.3525 |



11b

FZ9033-2.JDF

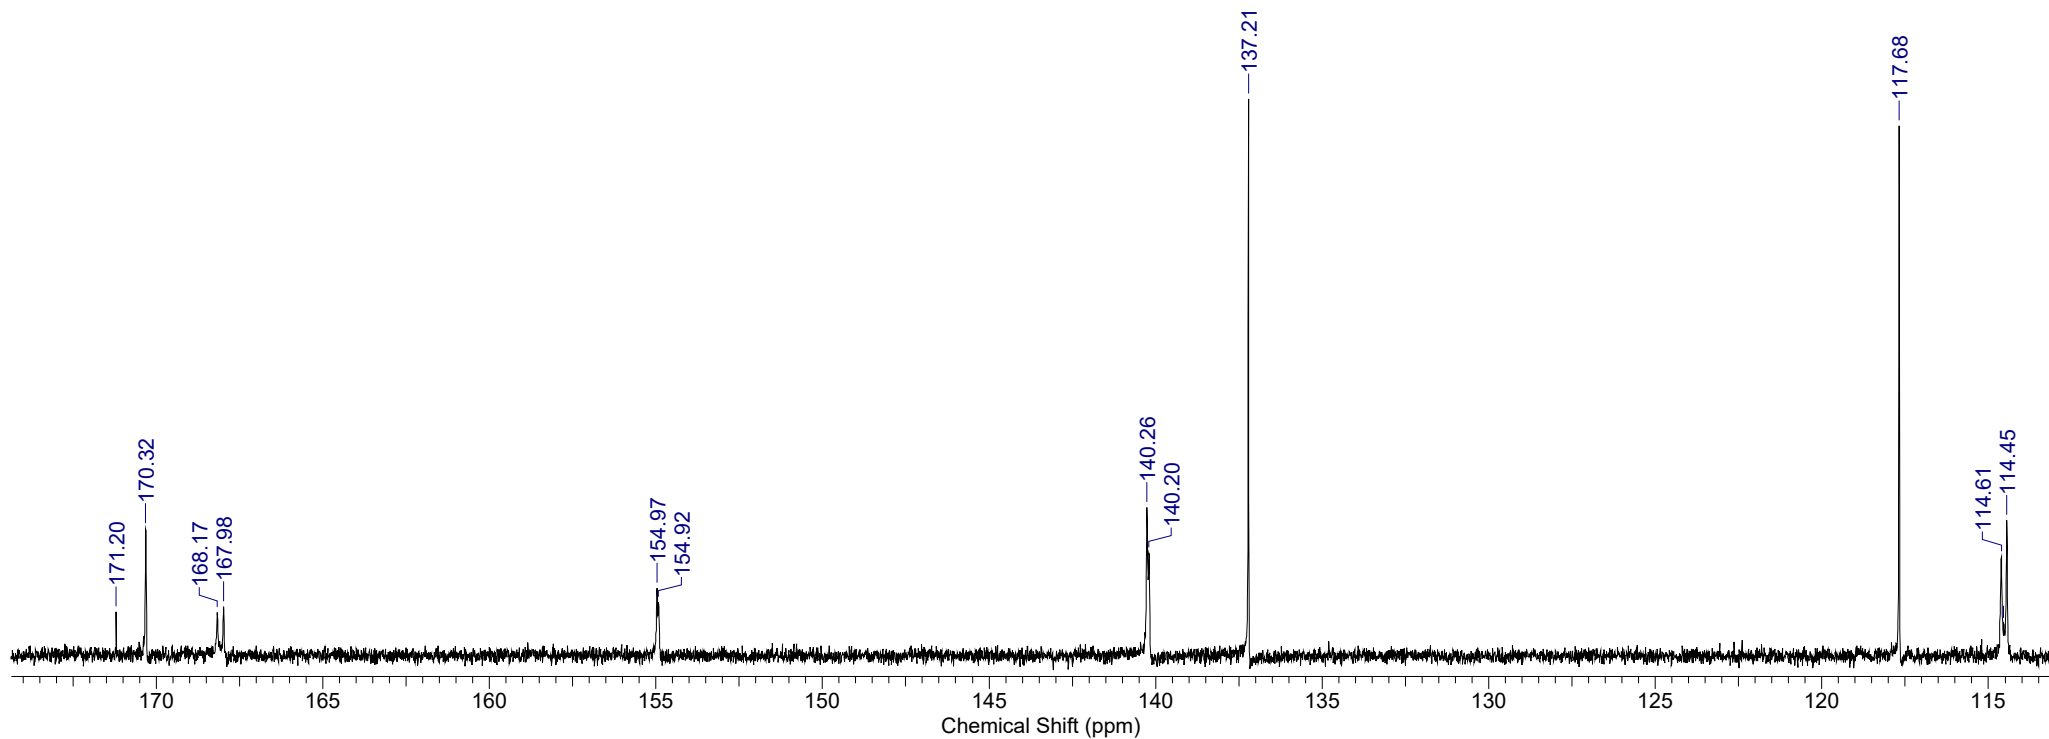

|                                                                |                    |
|----------------------------------------------------------------|--------------------|
| <b>Formula</b> C <sub>21</sub> H <sub>25</sub> NO <sub>7</sub> | <b>FW</b> 403.4257 |
|----------------------------------------------------------------|--------------------|

|                                        |                                                          |                                        |
|----------------------------------------|----------------------------------------------------------|----------------------------------------|
| <b>Acquisition Time (sec)</b> 0.6921   | <b>Comment</b> single pulse decoupled gated NOE          | <b>Date</b> 24 Aug 2020 16:46:32       |
| <b>Date Stamp</b> 24 Aug 2020 16:47:46 | <b>File Name</b> C:\USERS\la6a534\DOWNLOADS\FZ9033-2.JDF |                                        |
| <b>Frequency (MHz)</b> 150.91          | <b>Nucleus</b> 13C                                       | <b>Number of Transients</b> 8000       |
| <b>Original Points Count</b> 32768     | <b>Owner</b> CKP                                         | <b>Points Count</b> 32768              |
| <b>Receiver Gain</b> 58.00             | <b>Solvent</b> CHLOROFORM-d                              | <b>Pulse Sequence</b> single_pulse_dec |
| <b>Sweep Width (Hz)</b> 47348.49       |                                                          | <b>Spectrum Offset (Hz)</b> 15079.3525 |

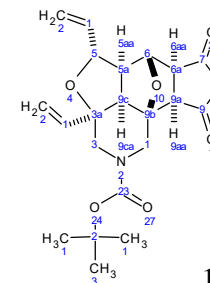

FZ9033-2.JDF

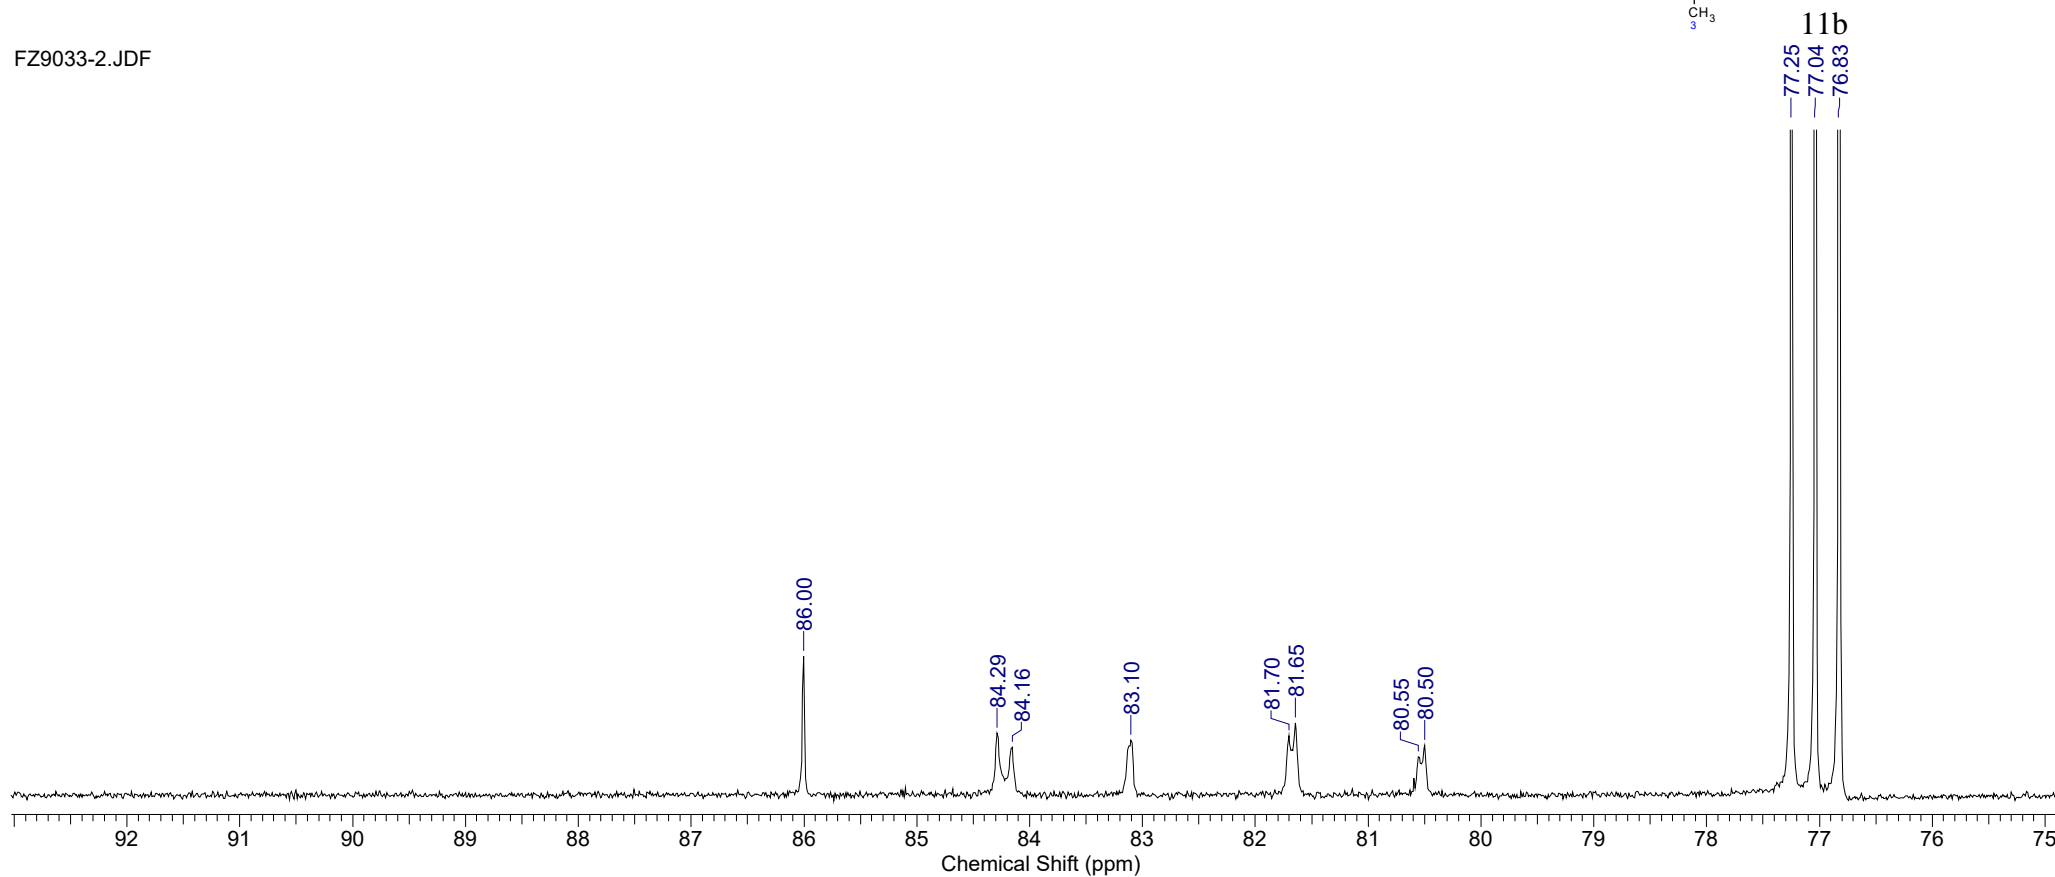



|                                                                |                    |
|----------------------------------------------------------------|--------------------|
| <b>Formula</b> C <sub>21</sub> H <sub>25</sub> NO <sub>7</sub> | <b>FW</b> 403.4257 |
|----------------------------------------------------------------|--------------------|

|                                        |                                                          |                                        |
|----------------------------------------|----------------------------------------------------------|----------------------------------------|
| <b>Acquisition Time (sec)</b> 0.6921   | <b>Comment</b> single pulse decoupled gated NOE          | <b>Date</b> 24 Aug 2020 16:46:32       |
| <b>Date Stamp</b> 24 Aug 2020 16:47:46 | <b>File Name</b> C:\USERS\la6a534\DOWNLOADS\FZ9033-2.JDF |                                        |
| <b>Frequency (MHz)</b> 150.91          | <b>Nucleus</b> 13C                                       | <b>Number of Transients</b> 8000       |
| <b>Original Points Count</b> 32768     | <b>Owner</b> CKP                                         | <b>Points Count</b> 32768              |
| <b>Receiver Gain</b> 58.00             | <b>Solvent</b> CHLOROFORM-d                              | <b>Pulse Sequence</b> single pulse dec |
| <b>Sweep Width (Hz)</b> 47348.49       |                                                          | <b>Spectrum Offset (Hz)</b> 15079.3525 |

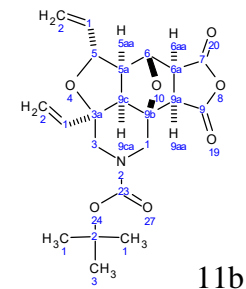

FZ9033-2.JDF

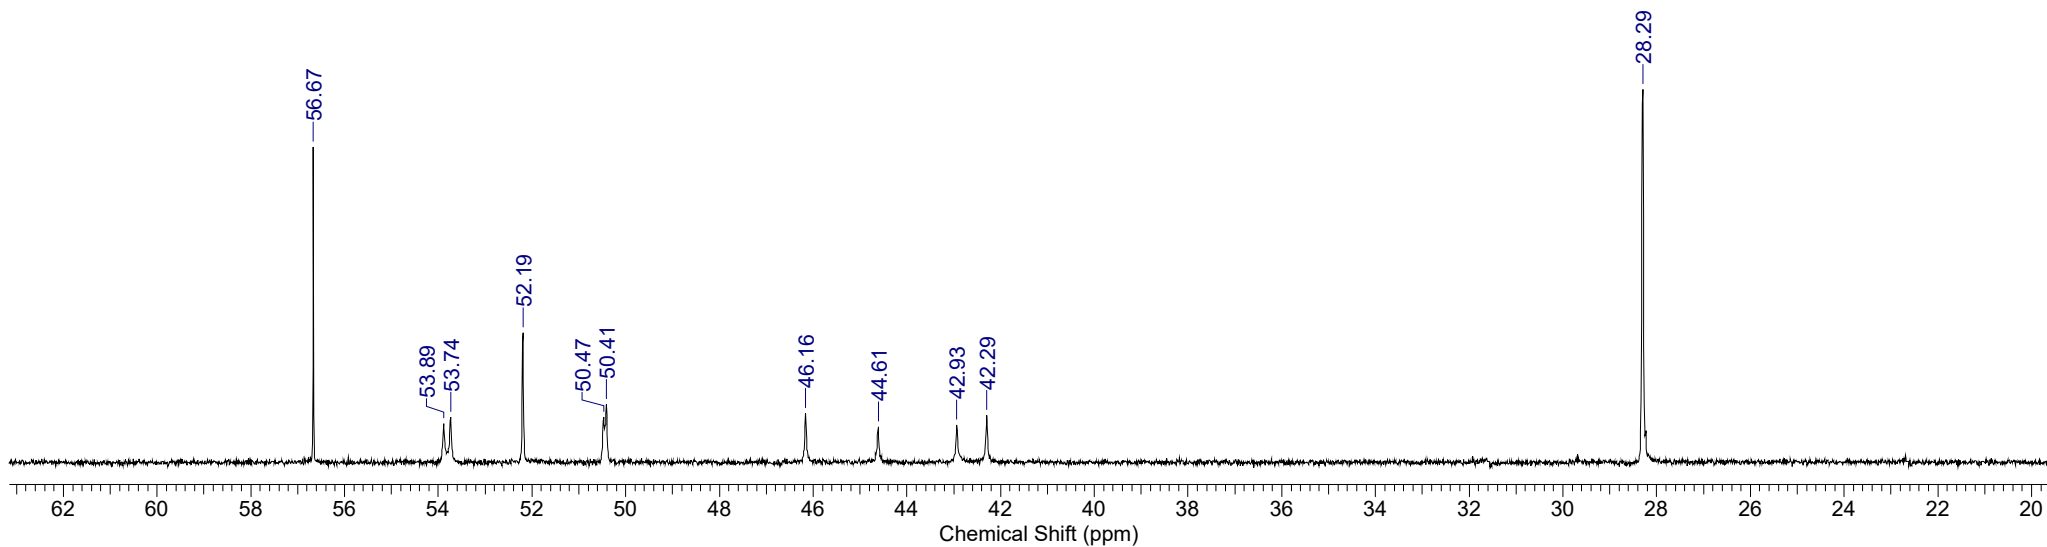

|                                                                |                    |
|----------------------------------------------------------------|--------------------|
| <b>Formula</b> C <sub>23</sub> H <sub>21</sub> NO <sub>6</sub> | <b>FW</b> 407.4159 |
|----------------------------------------------------------------|--------------------|

|                                                              |                                    |                                       |                                        |
|--------------------------------------------------------------|------------------------------------|---------------------------------------|----------------------------------------|
| <b>Acquisition Time (sec)</b> 1.9818                         | <b>Comment</b> single_pulse        | <b>Date</b> 20 Aug 2020 11:19:33      | <b>Date Stamp</b> 20 Aug 2020 11:20:40 |
| <b>File Name</b> C:\USERS\Лабa534\DOWNLOADS\FZ9022-1 (1).JDF | <b>Frequency (MHz)</b> 600.17      | <b>Nucleus</b> 1H                     | <b>Number of Transients</b> 8          |
| <b>Origin</b> ECA 600                                        | <b>Original Points Count</b> 32768 | <b>Owner</b> CKP                      | <b>Pulse Sequence</b> single_pulse.ex2 |
| <b>Receiver Gain</b> 38.00                                   | <b>Solvent</b> CHLOROFORM-d        | <b>Spectrum Offset (Hz)</b> 5412.6455 | <b>Sweep Width (Hz)</b> 16534.39       |

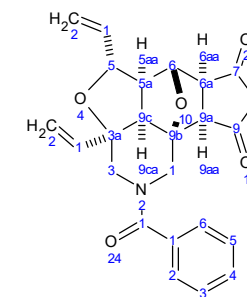

11c

FZ9022-1 (1).ESP

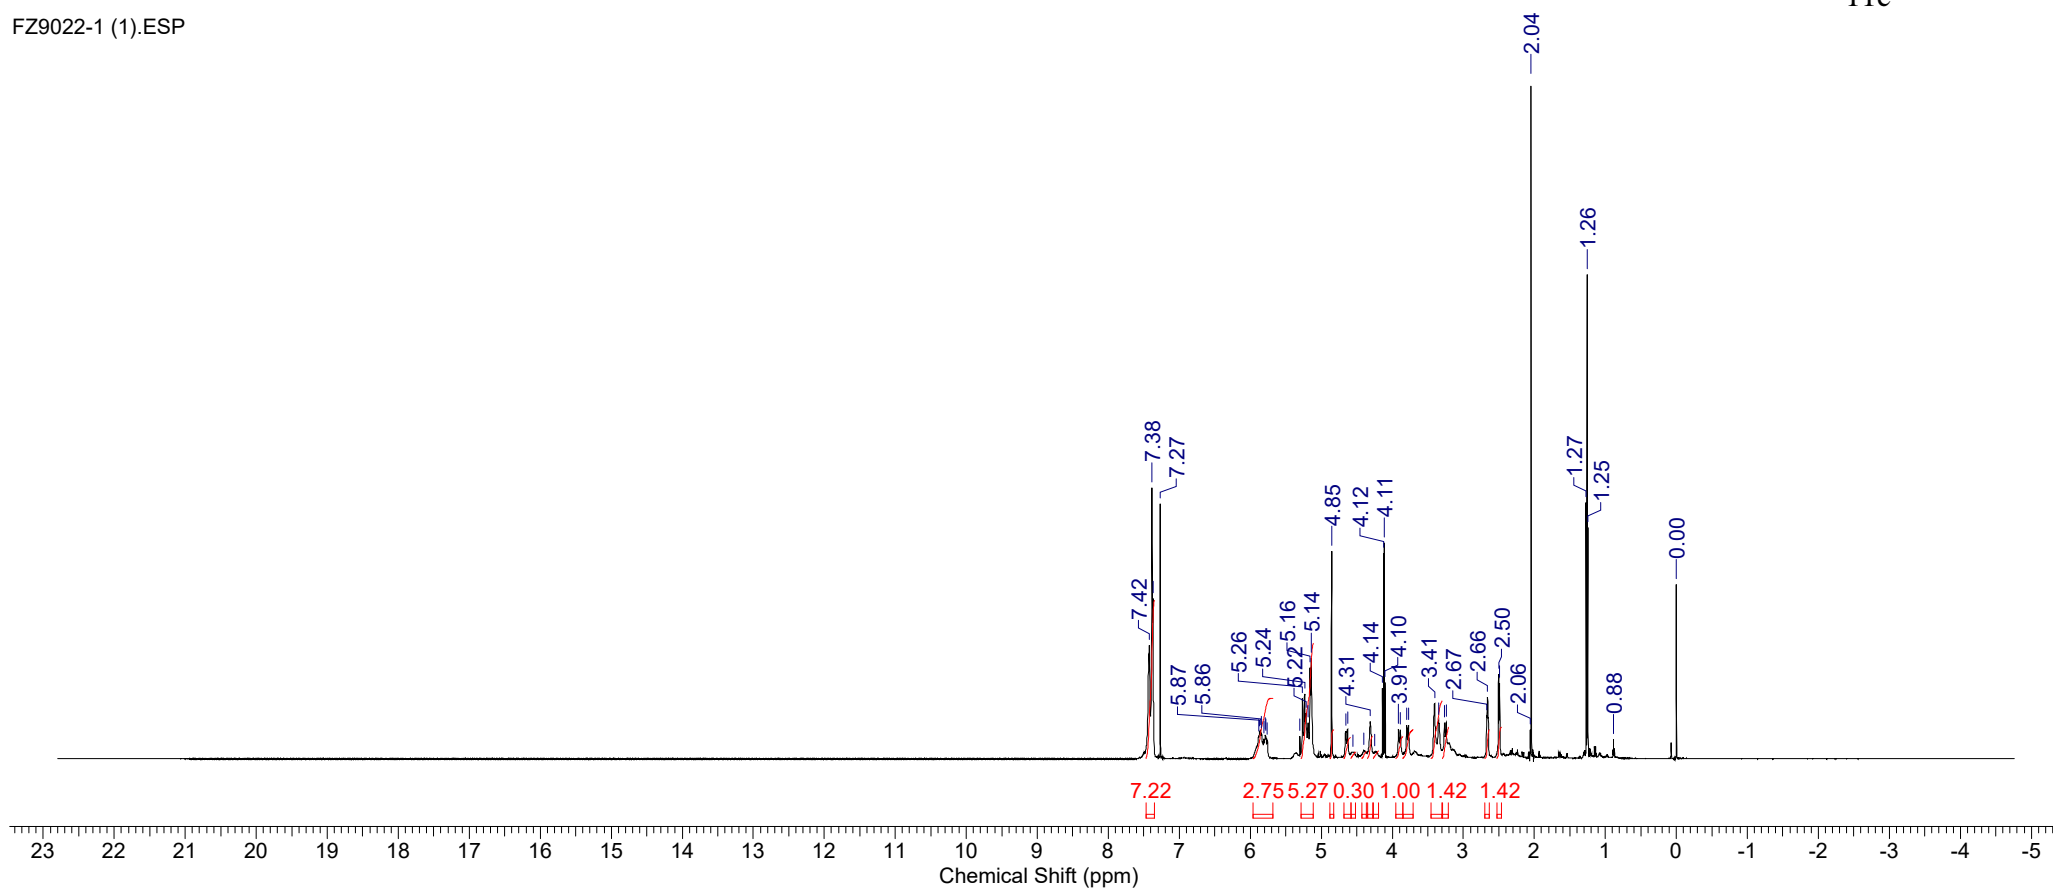

|                                                                |                    |
|----------------------------------------------------------------|--------------------|
| <b>Formula</b> C <sub>23</sub> H <sub>21</sub> NO <sub>6</sub> | <b>FW</b> 407.4159 |
|----------------------------------------------------------------|--------------------|

|                                                              |                                    |                                       |                                        |
|--------------------------------------------------------------|------------------------------------|---------------------------------------|----------------------------------------|
| <b>Acquisition Time (sec)</b> 1.9818                         | <b>Comment</b> single pulse        | <b>Date</b> 20 Aug 2020 11:19:33      | <b>Date Stamp</b> 20 Aug 2020 11:20:40 |
| <b>File Name</b> C:\USERS\Лабa534\DOWNLOADS\FZ9022-1 (1).JDF | <b>Frequency (MHz)</b> 600.17      | <b>Nucleus</b> 1H                     | <b>Number of Transients</b> 8          |
| <b>Origin</b> ECA 600                                        | <b>Original Points Count</b> 32768 | <b>Owner</b> CKP                      | <b>Pulse Sequence</b> single_pulse.ex2 |
| <b>Receiver Gain</b> 38.00                                   | <b>Solvent</b> CHLOROFORM-d        | <b>Spectrum Offset (Hz)</b> 5412.6455 | <b>Sweep Width (Hz)</b> 16534.39       |



11c

FZ9022-1 (1).ESP

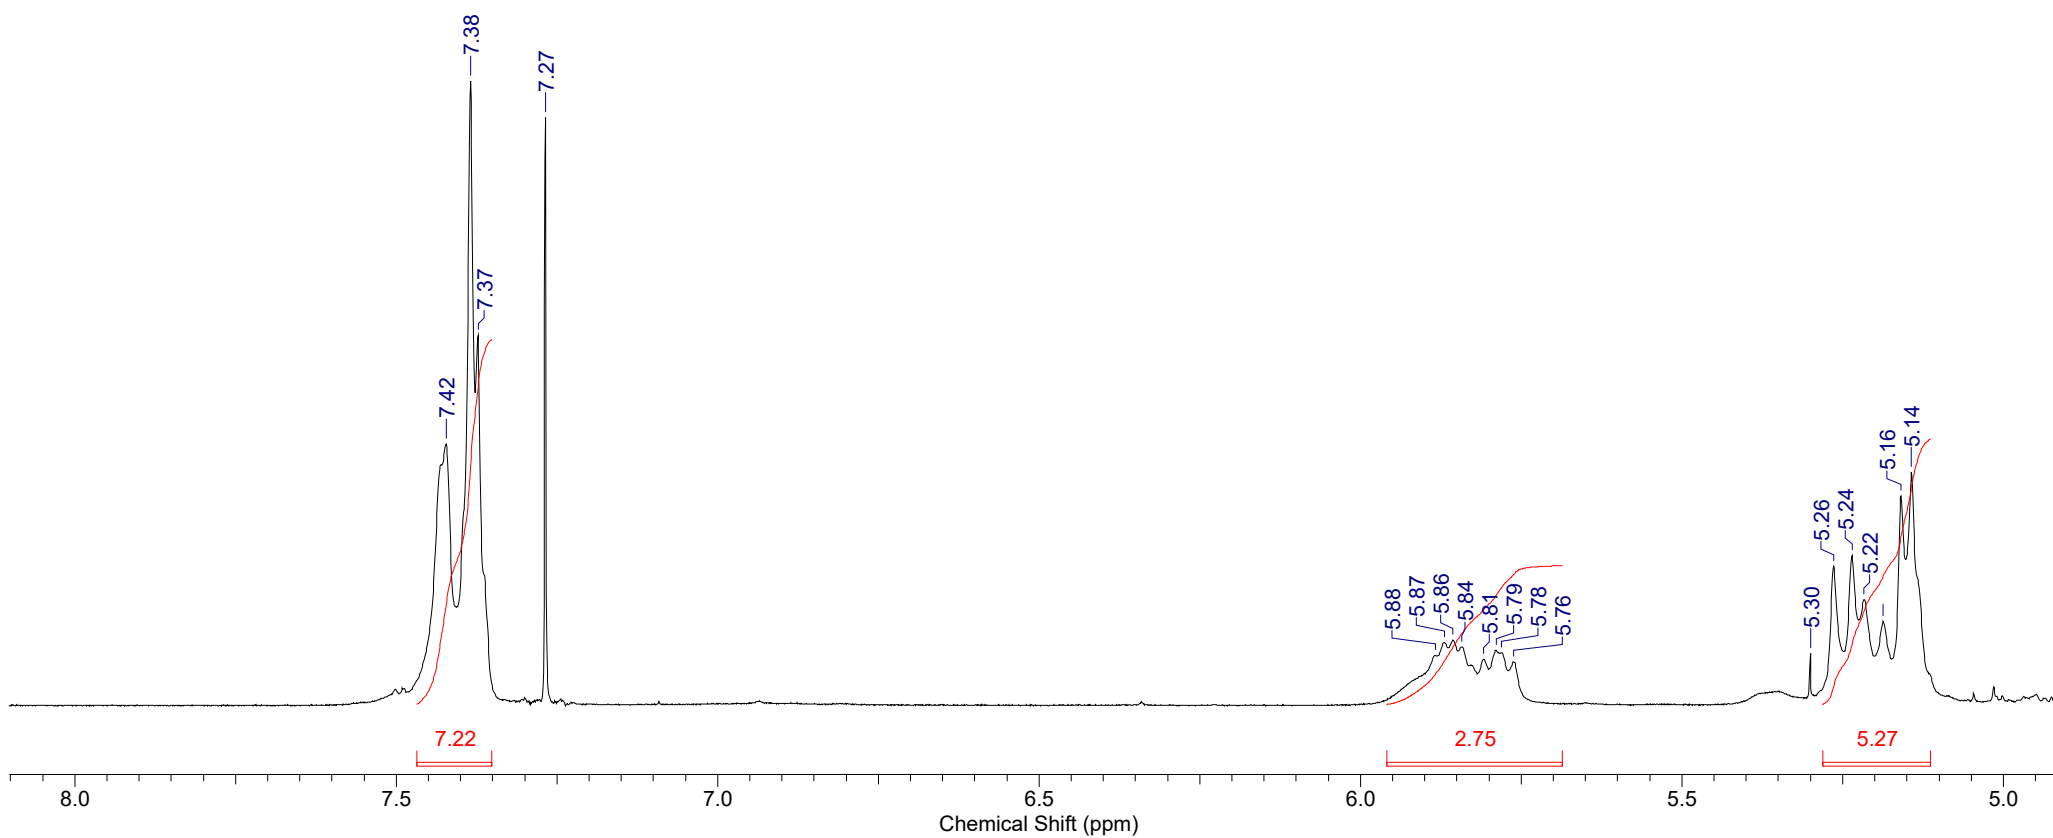

|                                                                |                    |
|----------------------------------------------------------------|--------------------|
| <b>Formula</b> C <sub>23</sub> H <sub>21</sub> NO <sub>6</sub> | <b>FW</b> 407.4159 |
|----------------------------------------------------------------|--------------------|

|                                                              |                                    |                                       |                                        |
|--------------------------------------------------------------|------------------------------------|---------------------------------------|----------------------------------------|
| <b>Acquisition Time (sec)</b> 1.9818                         | <b>Comment</b> single_pulse        | <b>Date</b> 20 Aug 2020 11:19:33      | <b>Date Stamp</b> 20 Aug 2020 11:20:40 |
| <b>File Name</b> C:\USERS\Лабa534\DOWNLOADS\FZ9022-1 (1).JDF | <b>Frequency (MHz)</b> 600.17      | <b>Nucleus</b> 1H                     | <b>Number of Transients</b> 8          |
| <b>Origin</b> ECA 600                                        | <b>Original Points Count</b> 32768 | <b>Owner</b> CKP                      | <b>Pulse Sequence</b> single_pulse.ex2 |
| <b>Receiver Gain</b> 38.00                                   | <b>Solvent</b> CHLOROFORM-d        | <b>Spectrum Offset (Hz)</b> 5412.6455 | <b>Sweep Width (Hz)</b> 16534.39       |

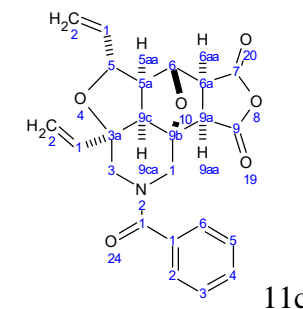

FZ9022-1 (1).ESP

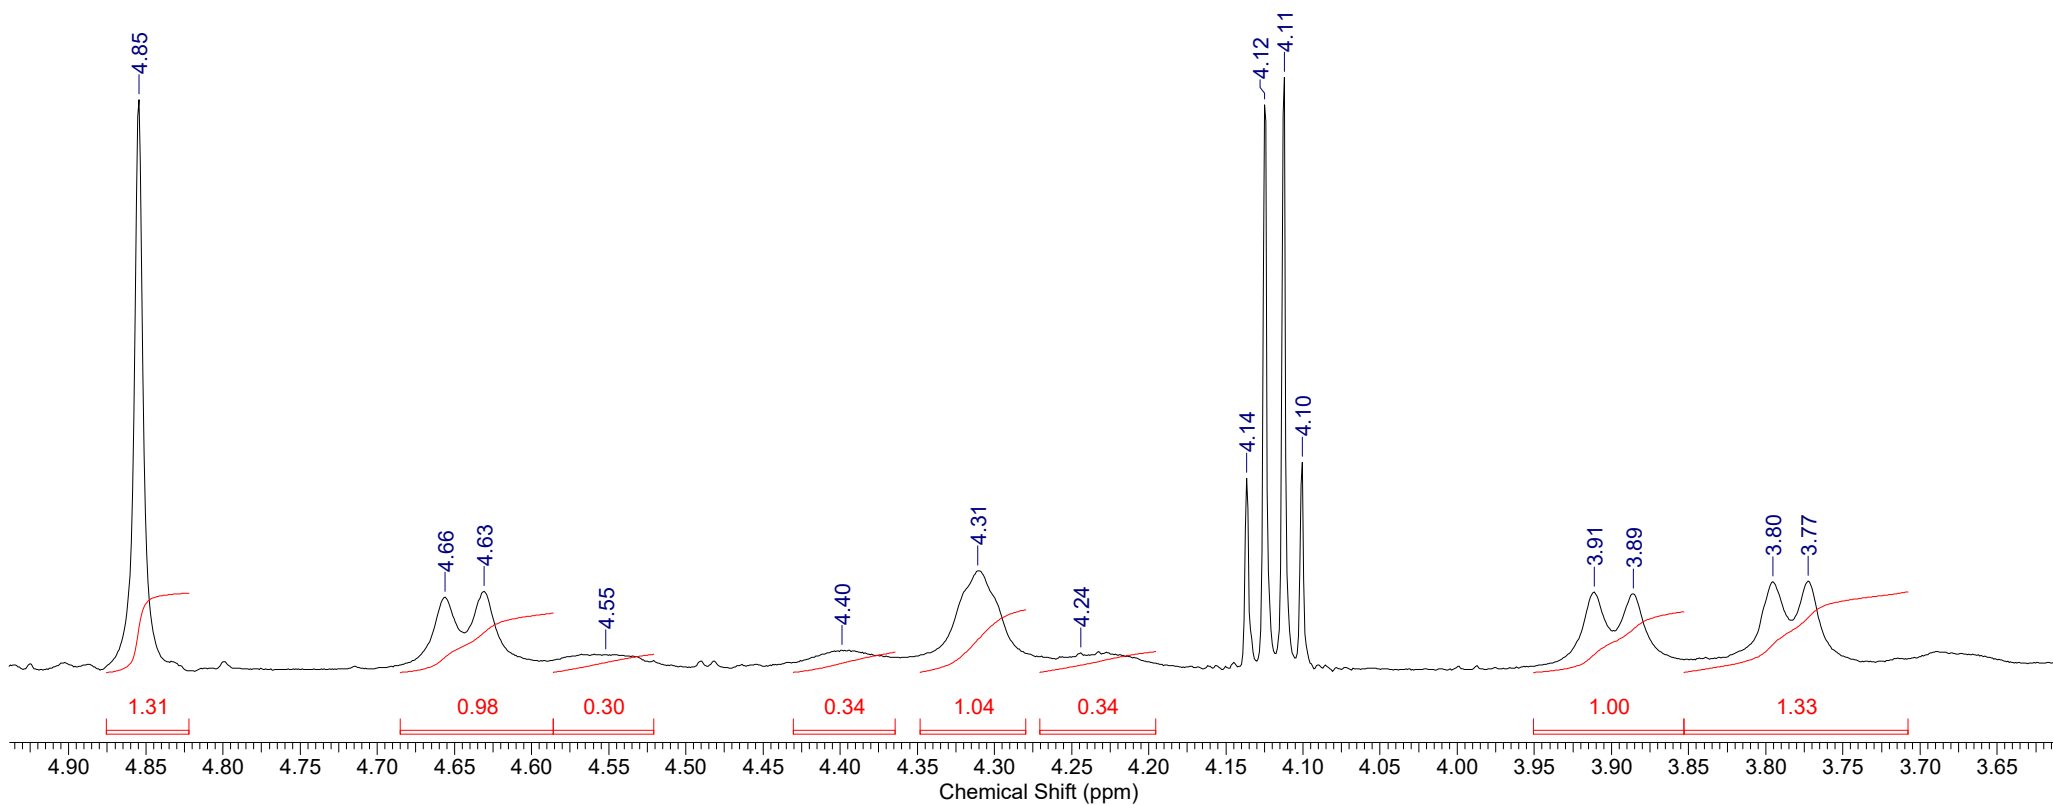

|                                                                |                    |
|----------------------------------------------------------------|--------------------|
| <b>Formula</b> C <sub>23</sub> H <sub>21</sub> NO <sub>6</sub> | <b>FW</b> 407.4159 |
|----------------------------------------------------------------|--------------------|

|                                                              |                                    |                                       |                                        |
|--------------------------------------------------------------|------------------------------------|---------------------------------------|----------------------------------------|
| <b>Acquisition Time (sec)</b> 1.9818                         | <b>Comment</b> single_pulse        | <b>Date</b> 20 Aug 2020 11:19:33      | <b>Date Stamp</b> 20 Aug 2020 11:20:40 |
| <b>File Name</b> C:\USERS\Лабa534\DOWNLOADS\FZ9022-1 (1).JDF | <b>Frequency (MHz)</b> 600.17      | <b>Nucleus</b> 1H                     | <b>Number of Transients</b> 8          |
| <b>Origin</b> ECA 600                                        | <b>Original Points Count</b> 32768 | <b>Owner</b> CKP                      | <b>Pulse Sequence</b> single_pulse.ex2 |
| <b>Receiver Gain</b> 38.00                                   | <b>Solvent</b> CHLOROFORM-d        | <b>Spectrum Offset (Hz)</b> 5412.6455 | <b>Sweep Width (Hz)</b> 16534.39       |

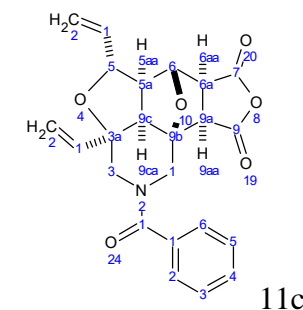

FZ9022-1 (1).ESP

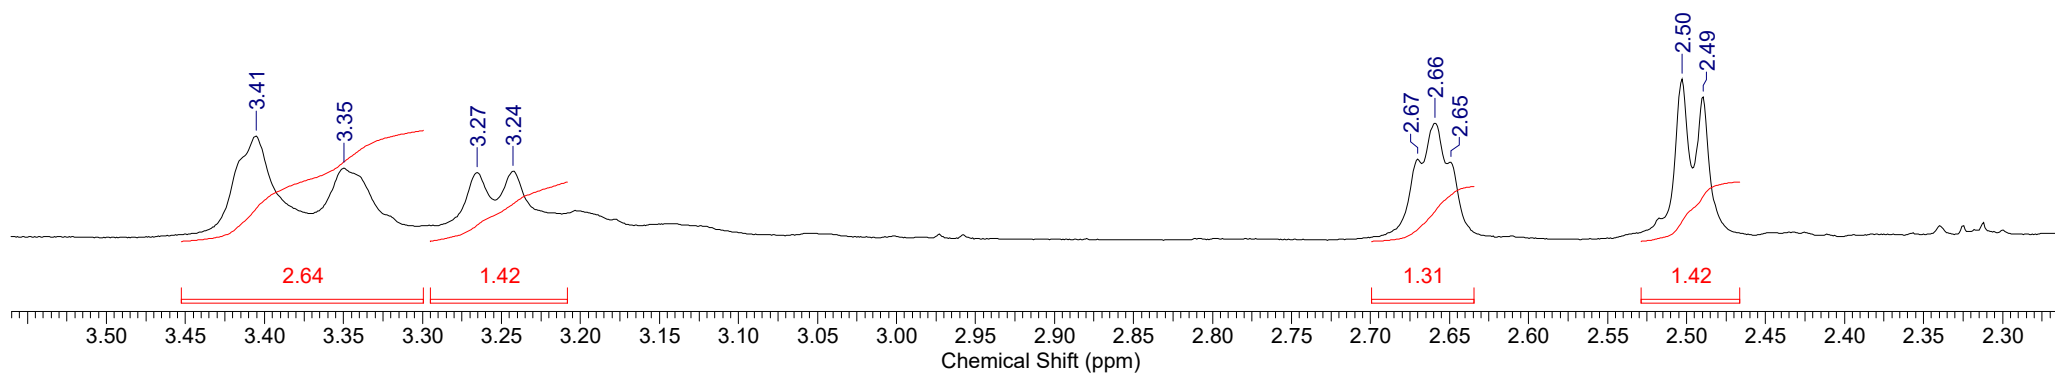

|                                                                |                    |
|----------------------------------------------------------------|--------------------|
| <b>Formula</b> C <sub>23</sub> H <sub>21</sub> NO <sub>6</sub> | <b>FW</b> 407.4159 |
|----------------------------------------------------------------|--------------------|

|                                        |                                                          |                                        |
|----------------------------------------|----------------------------------------------------------|----------------------------------------|
| <b>Acquisition Time (sec)</b> 0.6921   | <b>Comment</b> single pulse decoupled gated NOE          | <b>Date</b> 22 Aug 2020 10:08:55       |
| <b>Date Stamp</b> 22 Aug 2020 10:10:04 | <b>File Name</b> C:\USERS\Ia6a534\DOWNLOADS\FZ9022-2.JDF |                                        |
| <b>Frequency (MHz)</b> 150.91          | <b>Nucleus</b> 13C                                       | <b>Number of Transients</b> 3201       |
| <b>Original Points Count</b> 32768     | <b>Owner</b> CKP                                         | <b>Points Count</b> 32768              |
| <b>Receiver Gain</b> 56.00             | <b>Solvent</b> CHLOROFORM-d                              | <b>Pulse Sequence</b> single pulse dec |
| <b>Sweep Width (Hz)</b> 47348.49       |                                                          | <b>Spectrum Offset (Hz)</b> 15079.3525 |

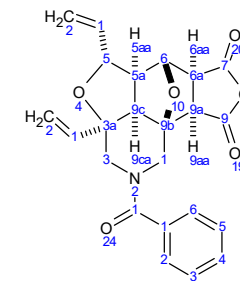

11c

FZ9022-2.JDF

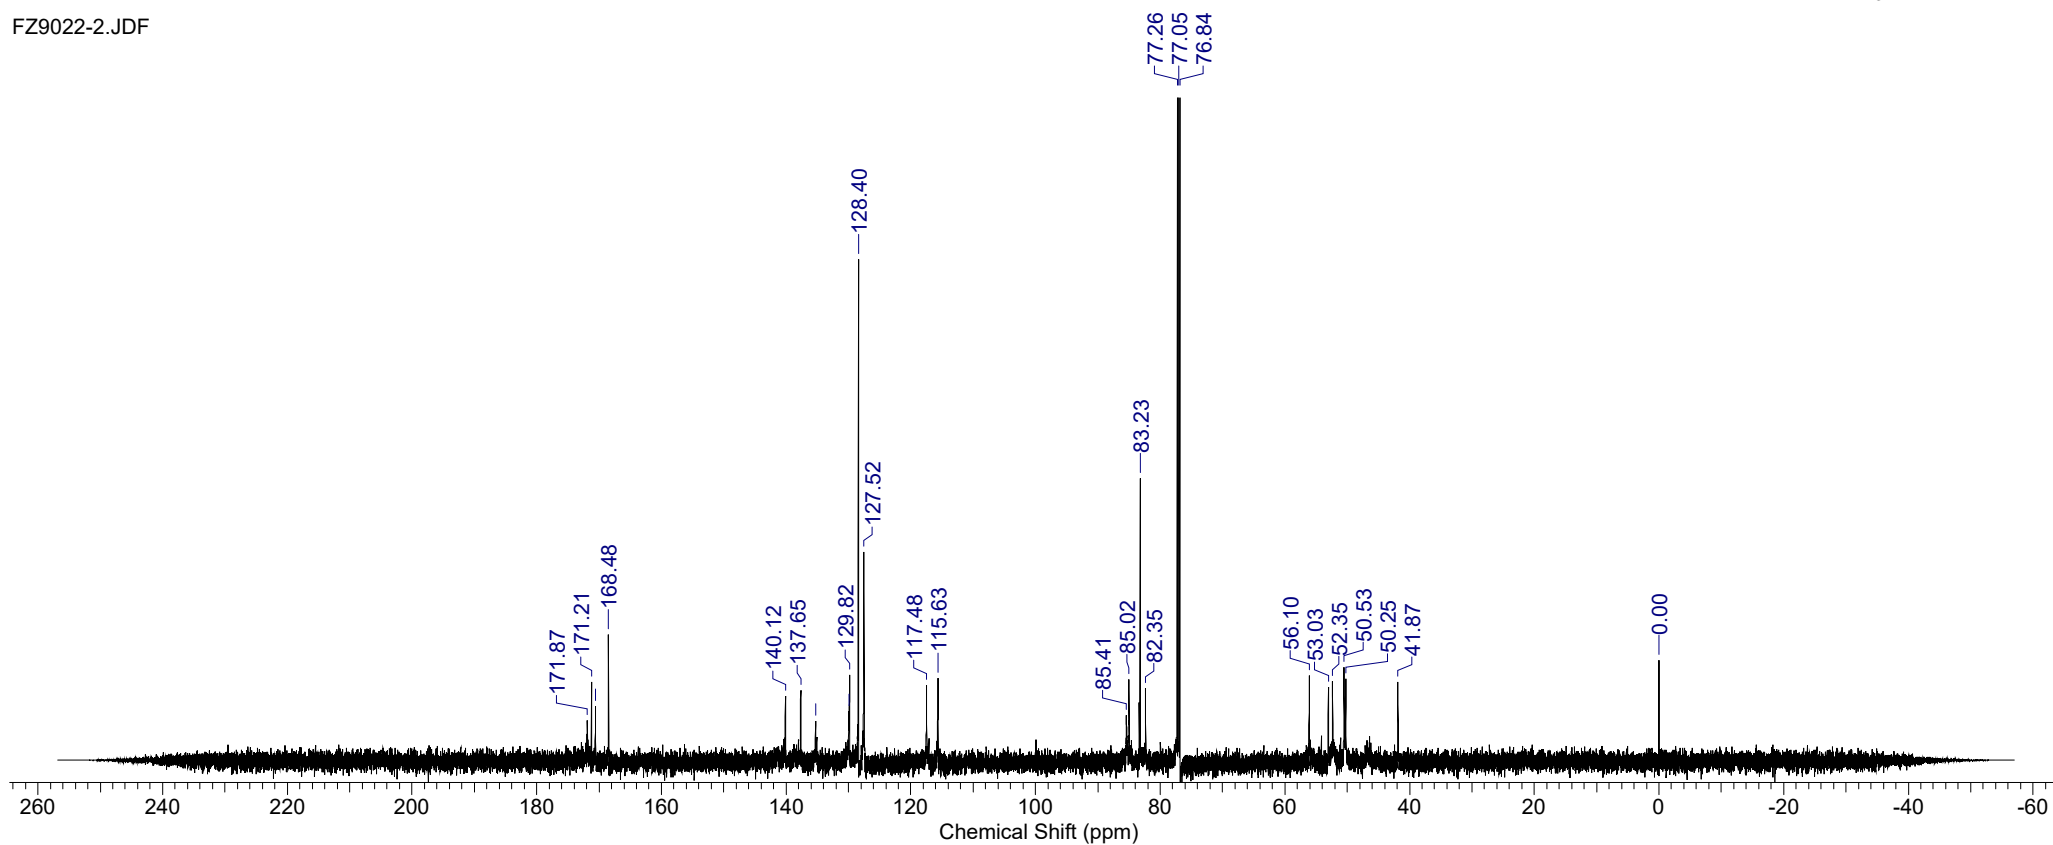

|                                                                |                    |
|----------------------------------------------------------------|--------------------|
| <b>Formula</b> C <sub>23</sub> H <sub>21</sub> NO <sub>6</sub> | <b>FW</b> 407.4159 |
|----------------------------------------------------------------|--------------------|

|                                        |                                                      |                                        |
|----------------------------------------|------------------------------------------------------|----------------------------------------|
| <b>Acquisition Time (sec)</b> 0.6921   | <b>Comment</b> single pulse decoupled gated NOE      | <b>Date</b> 22 Aug 2020 10:08:55       |
| <b>Date Stamp</b> 22 Aug 2020 10:10:04 | <b>File Name</b> C:\USERS\l\l\Downloads\FZ9022-2.JDF |                                        |
| <b>Frequency (MHz)</b> 150.91          | <b>Nucleus</b> 13C                                   | <b>Number of Transients</b> 3201       |
| <b>Original Points Count</b> 32768     | <b>Owner</b> CKP                                     | <b>Points Count</b> 32768              |
| <b>Receiver Gain</b> 56.00             | <b>Solvent</b> CHLOROFORM-d                          | <b>Pulse Sequence</b> single pulse dec |
| <b>Sweep Width (Hz)</b> 47348.49       |                                                      | <b>Spectrum Offset (Hz)</b> 15079.3525 |

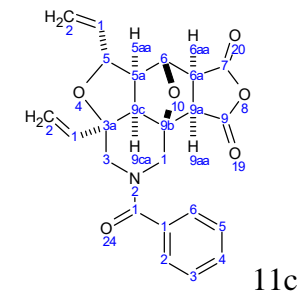

FZ9022-2.JDF

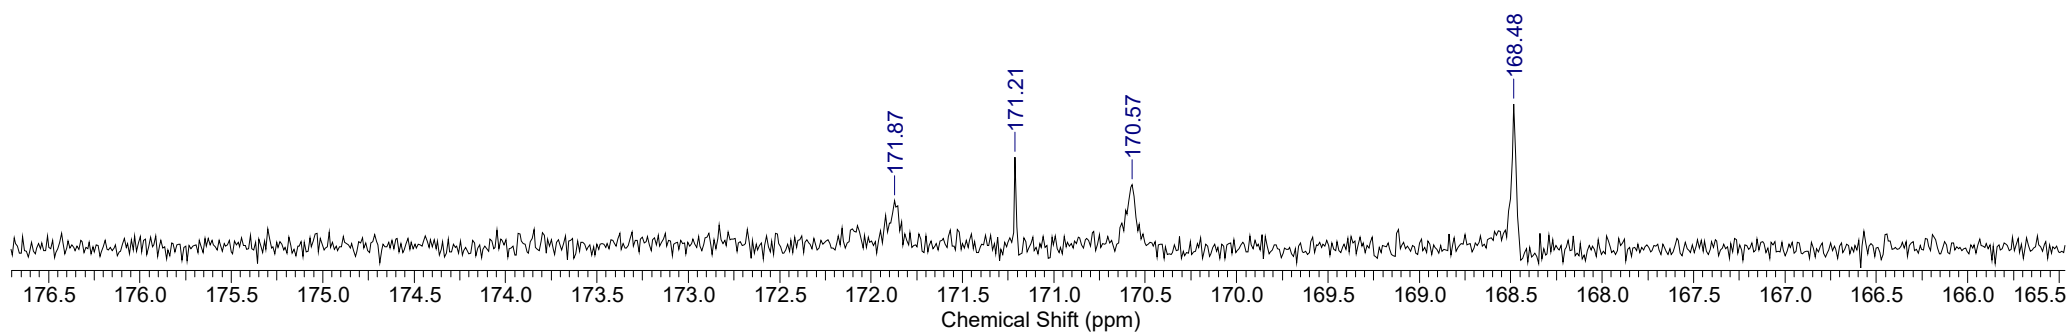

|                                                                |                    |
|----------------------------------------------------------------|--------------------|
| <b>Formula</b> C <sub>23</sub> H <sub>21</sub> NO <sub>6</sub> | <b>FW</b> 407.4159 |
|----------------------------------------------------------------|--------------------|

|                                        |                                                          |                                        |
|----------------------------------------|----------------------------------------------------------|----------------------------------------|
| <b>Acquisition Time (sec)</b> 0.6921   | <b>Comment</b> single pulse decoupled gated NOE          | <b>Date</b> 22 Aug 2020 10:08:55       |
| <b>Date Stamp</b> 22 Aug 2020 10:10:04 | <b>File Name</b> C:\USERS\la6a534\DOWNLOADS\FZ9022-2.JDF |                                        |
| <b>Frequency (MHz)</b> 150.91          | <b>Nucleus</b> 13C                                       | <b>Number of Transients</b> 3201       |
| <b>Original Points Count</b> 32768     | <b>Owner</b> CKP                                         | <b>Points Count</b> 32768              |
| <b>Receiver Gain</b> 56.00             | <b>Solvent</b> CHLOROFORM-d                              | <b>Pulse Sequence</b> single pulse dec |
| <b>Sweep Width (Hz)</b> 47348.49       |                                                          | <b>Spectrum Offset (Hz)</b> 15079.3525 |

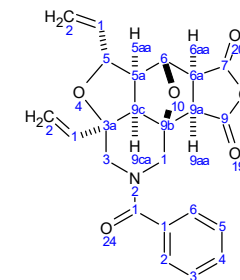

11c

FZ9022-2.JDF

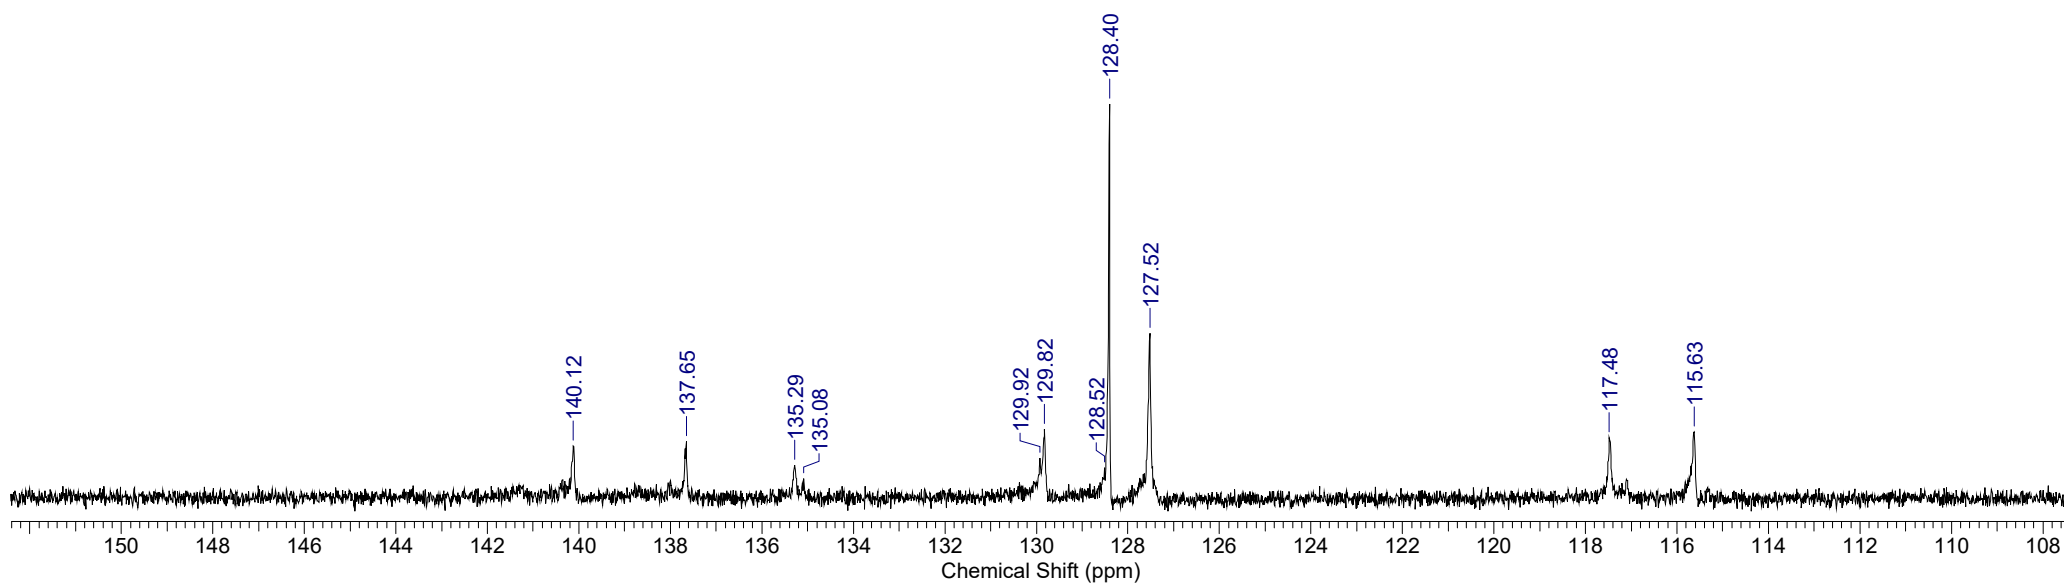



|                                                                |                    |
|----------------------------------------------------------------|--------------------|
| <b>Formula</b> C <sub>23</sub> H <sub>21</sub> NO <sub>6</sub> | <b>FW</b> 407.4159 |
|----------------------------------------------------------------|--------------------|

|                                        |                                                           |                                        |
|----------------------------------------|-----------------------------------------------------------|----------------------------------------|
| <b>Acquisition Time (sec)</b> 0.6921   | <b>Comment</b> single pulse decoupled gated NOE           | <b>Date</b> 22 Aug 2020 10:08:55       |
| <b>Date Stamp</b> 22 Aug 2020 10:10:04 | <b>File Name</b> C:\USERS\l1a6a534\DOWNLOADS\FZ9022-2.JDF |                                        |
| <b>Frequency (MHz)</b> 150.91          | <b>Nucleus</b> 13C                                        | <b>Number of Transients</b> 3201       |
| <b>Original Points Count</b> 32768     | <b>Owner</b> CKP                                          | <b>Points Count</b> 32768              |
| <b>Receiver Gain</b> 56.00             | <b>Solvent</b> CHLOROFORM-d                               | <b>Pulse Sequence</b> single pulse dec |
| <b>Sweep Width (Hz)</b> 47348.49       |                                                           | <b>Spectrum Offset (Hz)</b> 15079.3525 |

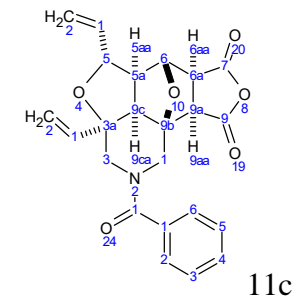

FZ9022-2.JDF

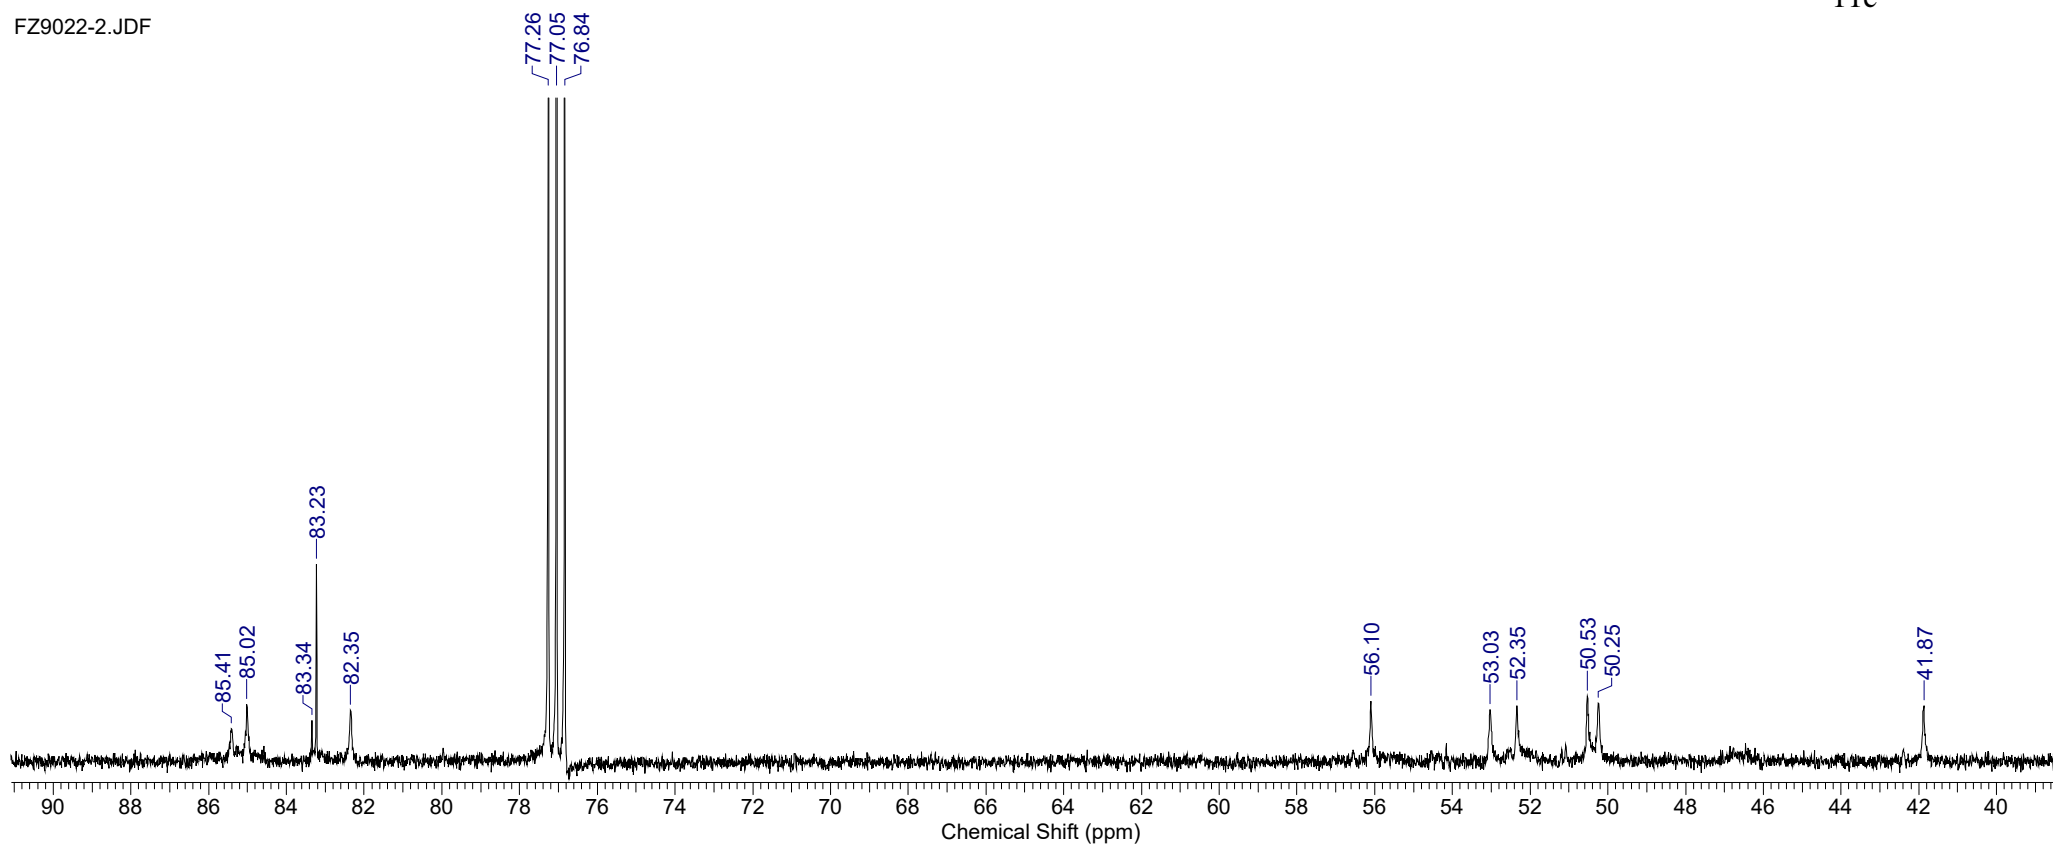

|                                                               |                    |
|---------------------------------------------------------------|--------------------|
| <b>Formula</b> C <sub>16</sub> H <sub>16</sub> O <sub>6</sub> | <b>FW</b> 304.2946 |
|---------------------------------------------------------------|--------------------|

|                                        |                                        |                                                           |                                    |
|----------------------------------------|----------------------------------------|-----------------------------------------------------------|------------------------------------|
| <b>Acquisition Time (sec)</b> 1.9818   | <b>Comment</b> single pulse            | <b>Date</b> 10 Oct 1990 17:21:36                          |                                    |
| <b>Date Stamp</b> 21 Dec 2019 04:26:16 |                                        | <b>File Name</b> C:\USERS\Jla6a534\DOWNLOADS\FZ8312-1.JDF | <b>Frequency (MHz)</b> 600.17      |
| <b>Nucleus</b> 1H                      | <b>Number of Transients</b> 8          | <b>Origin</b> ECA 600                                     | <b>Original Points Count</b> 32768 |
| <b>Points Count</b> 32768              | <b>Pulse Sequence</b> single_pulse.ex2 | <b>Receiver Gain</b> 48.00                                | <b>Owner</b> delta                 |
| <b>Spectrum Offset (Hz)</b> 5410.6274  | <b>Sweep Width (Hz)</b> 16534.39       | <b>Temperature (degree C)</b> 23.800                      | <b>Solvent</b> CHLOROFORM-d        |

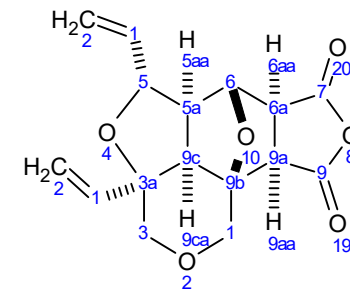

11d

FZ8312-1.JDF

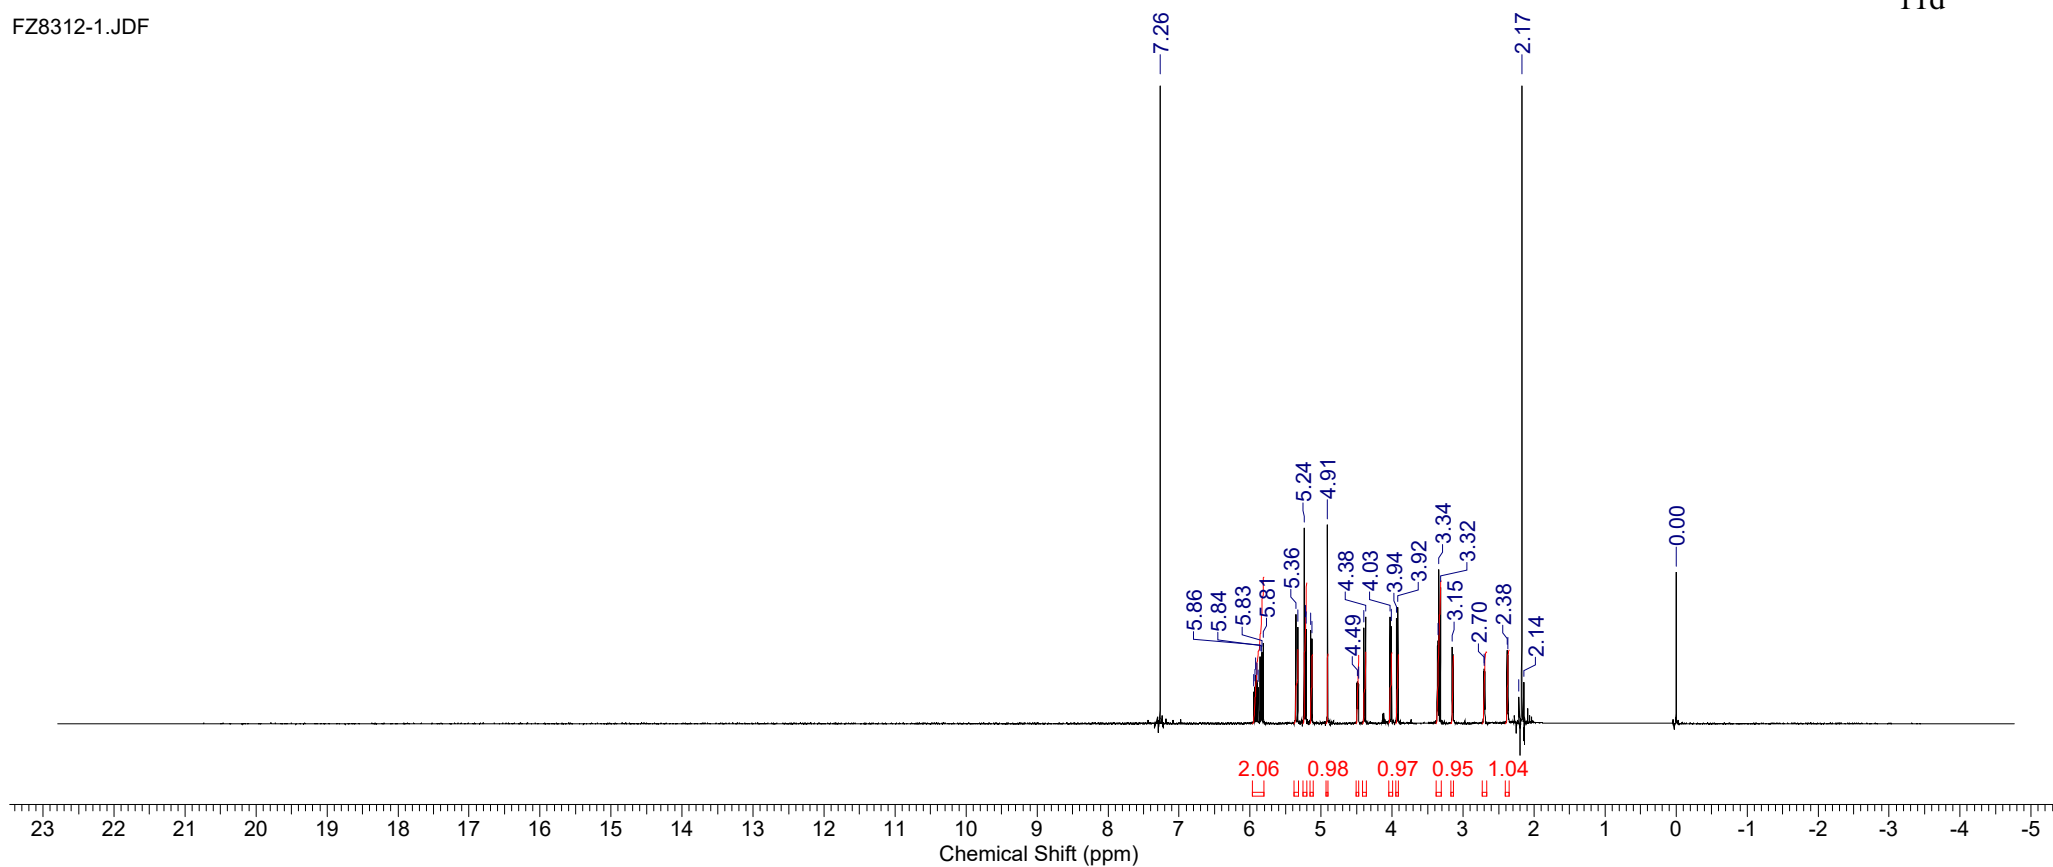

|                                                               |                    |
|---------------------------------------------------------------|--------------------|
| <b>Formula</b> C <sub>16</sub> H <sub>16</sub> O <sub>6</sub> | <b>FW</b> 304.2946 |
|---------------------------------------------------------------|--------------------|

|                                        |                                        |                                                          |                                    |
|----------------------------------------|----------------------------------------|----------------------------------------------------------|------------------------------------|
| <b>Acquisition Time (sec)</b> 1.9818   | <b>Comment</b> single pulse            | <b>Date</b> 10 Oct 1990 17:21:36                         |                                    |
| <b>Date Stamp</b> 21 Dec 2019 04:26:16 |                                        | <b>File Name</b> C:\USERS\Лабa534\DOWNLOADS\FZ8312-1.JDF | <b>Frequency (MHz)</b> 600.17      |
| <b>Nucleus</b> 1H                      | <b>Number of Transients</b> 8          | <b>Origin</b> ECA 600                                    | <b>Original Points Count</b> 32768 |
| <b>Points Count</b> 32768              | <b>Pulse Sequence</b> single_pulse.ex2 | <b>Receiver Gain</b> 48.00                               | <b>Owner</b> delta                 |
| <b>Spectrum Offset (Hz)</b> 5410.6274  | <b>Sweep Width (Hz)</b> 16534.39       | <b>Temperature (degree C)</b> 23.800                     | <b>Solvent</b> CHLOROFORM-d        |



11d

FZ8312-1.JDF

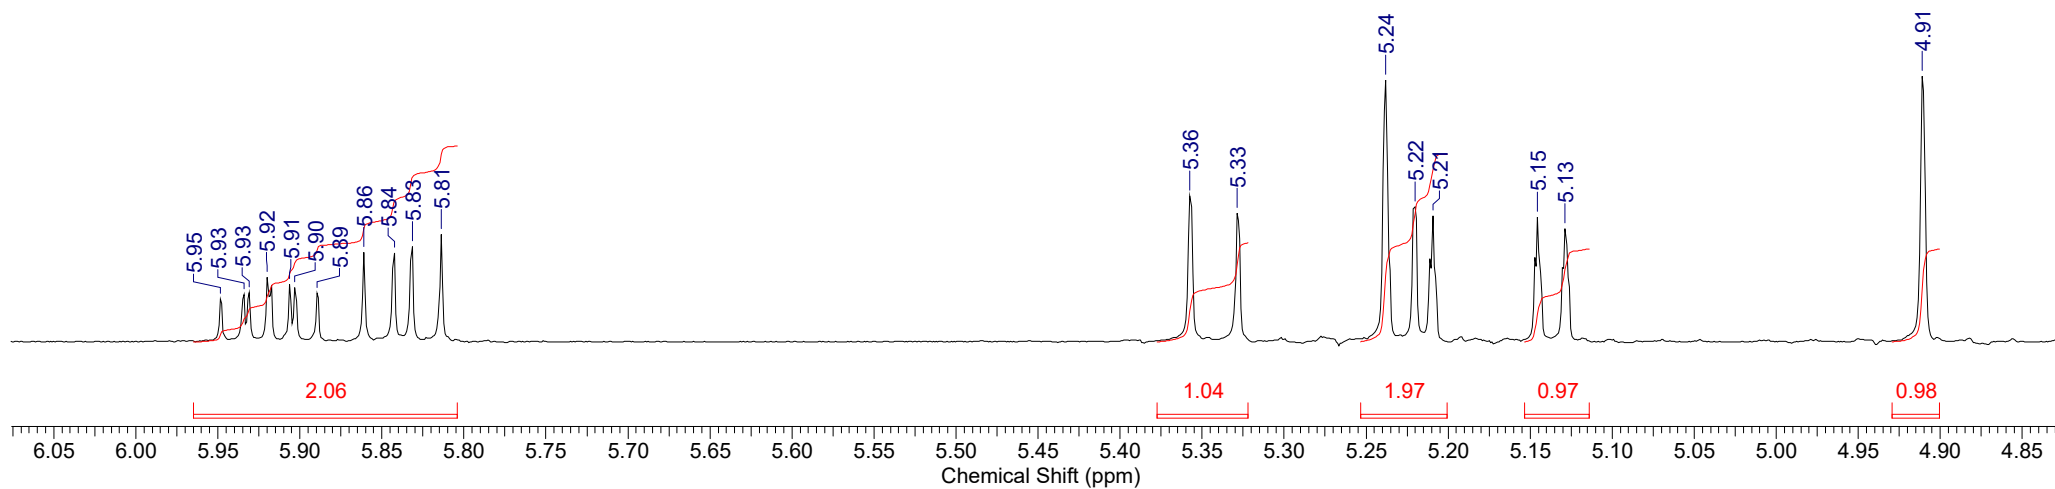

|                                                               |                    |
|---------------------------------------------------------------|--------------------|
| <b>Formula</b> C <sub>16</sub> H <sub>16</sub> O <sub>6</sub> | <b>FW</b> 304.2946 |
|---------------------------------------------------------------|--------------------|

|                                        |                                        |                                                          |                               |
|----------------------------------------|----------------------------------------|----------------------------------------------------------|-------------------------------|
| <b>Acquisition Time (sec)</b> 1.9818   | <b>Comment</b> single pulse            | <b>Date</b> 10 Oct 1990 17:21:36                         |                               |
| <b>Date Stamp</b> 21 Dec 2019 04:26:16 |                                        | <b>File Name</b> C:\USERS\Лабa534\DOWNLOADS\FZ8312-1.JDF | <b>Frequency (MHz)</b> 600.17 |
| <b>Nucleus</b> 1H                      | <b>Number of Transients</b> 8          | <b>Origin</b> ECA 600                                    | <b>Owner</b> delta            |
| <b>Points Count</b> 32768              | <b>Pulse Sequence</b> single_pulse.ex2 | <b>Receiver Gain</b> 48.00                               | <b>Solvent</b> CHLOROFORM-d   |
| <b>Spectrum Offset (Hz)</b> 5410.6274  | <b>Sweep Width (Hz)</b> 16534.39       | <b>Temperature (degree C)</b> 23.800                     |                               |

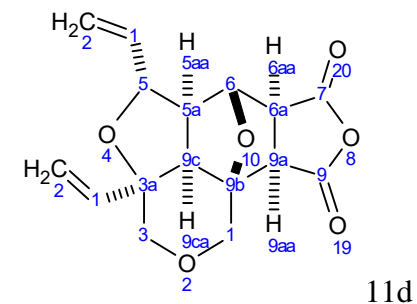

FZ8312-1.JDF

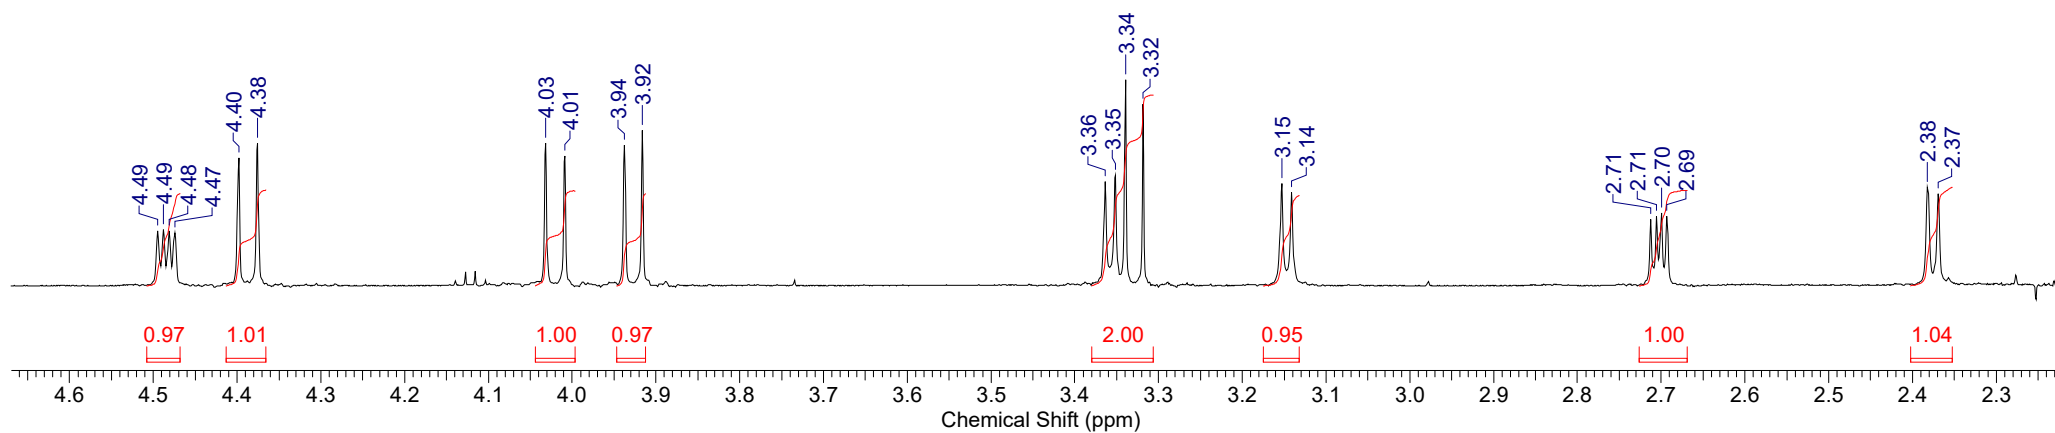

|                                                               |                    |
|---------------------------------------------------------------|--------------------|
| <b>Formula</b> C <sub>16</sub> H <sub>16</sub> O <sub>6</sub> | <b>FW</b> 304.2946 |
|---------------------------------------------------------------|--------------------|

|                                        |                                                          |                                        |
|----------------------------------------|----------------------------------------------------------|----------------------------------------|
| <b>Acquisition Time (sec)</b> 0.6921   | <b>Comment</b> single pulse decoupled gated NOE          | <b>Date</b> 12 Feb 2020 04:03:18       |
| <b>Date Stamp</b> 12 Feb 2020 03:25:06 | <b>File Name</b> C:\USERS\Лa6a534\DOWNLOADS\FZ8429-1.JDF |                                        |
| <b>Frequency (MHz)</b> 150.91          | <b>Nucleus</b> 13C                                       | <b>Number of Transients</b> 1000       |
| <b>Original Points Count</b> 32768     | <b>Owner</b> Mass                                        | <b>Origin</b> ECA 600                  |
| <b>Receiver Gain</b> 56.00             | <b>Solvent</b> CHLOROFORM-d                              | <b>Pulse Sequence</b> single pulse dec |
| <b>Sweep Width (Hz)</b> 47348.49       | <b>Temperature (degree C)</b> 24.000                     | <b>Spectrum Offset (Hz)</b> 15080.7979 |

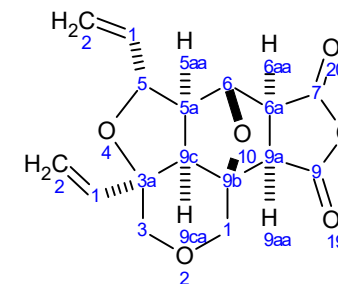

11d

FZ8429-1.JDF

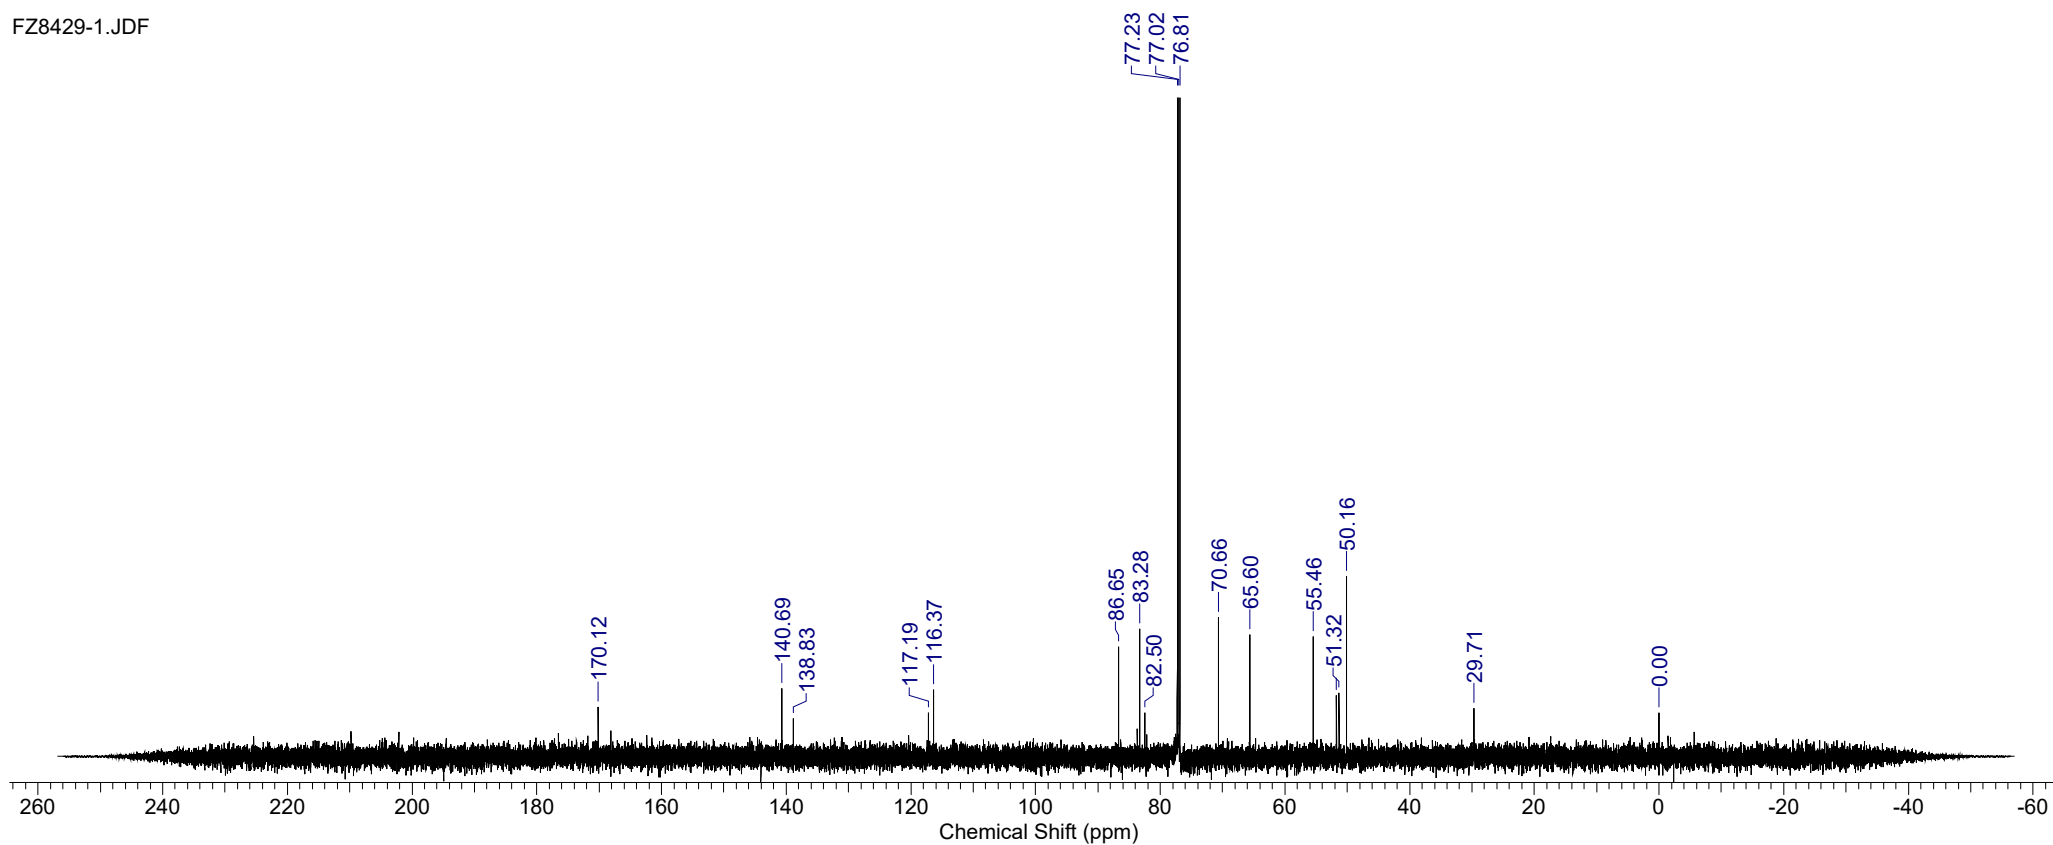

|                                                               |                    |
|---------------------------------------------------------------|--------------------|
| <b>Formula</b> C <sub>16</sub> H <sub>16</sub> O <sub>6</sub> | <b>FW</b> 304.2946 |
|---------------------------------------------------------------|--------------------|

|                                        |                                                          |                                        |
|----------------------------------------|----------------------------------------------------------|----------------------------------------|
| <b>Acquisition Time (sec)</b> 0.6921   | <b>Comment</b> single pulse decoupled gated NOE          | <b>Date</b> 12 Feb 2020 04:03:18       |
| <b>Date Stamp</b> 12 Feb 2020 03:25:06 | <b>File Name</b> C:\USERS\Лa6a534\DOWNLOADS\FZ8429-1.JDF |                                        |
| <b>Frequency (MHz)</b> 150.91          | <b>Nucleus</b> 13C                                       | <b>Number of Transients</b> 1000       |
| <b>Original Points Count</b> 32768     | <b>Owner</b> Mass                                        | <b>Points Count</b> 32768              |
| <b>Receiver Gain</b> 56.00             | <b>Solvent</b> CHLOROFORM-d                              | <b>Pulse Sequence</b> single pulse dec |
| <b>Sweep Width (Hz)</b> 47348.49       | <b>Temperature (degree C)</b> 24.000                     | <b>Spectrum Offset (Hz)</b> 15080.7979 |

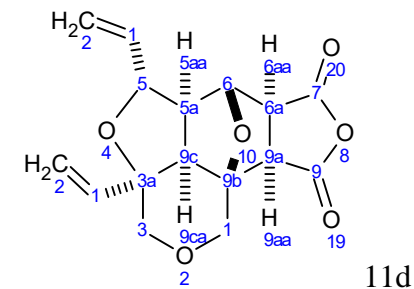

FZ8429-1.JDF

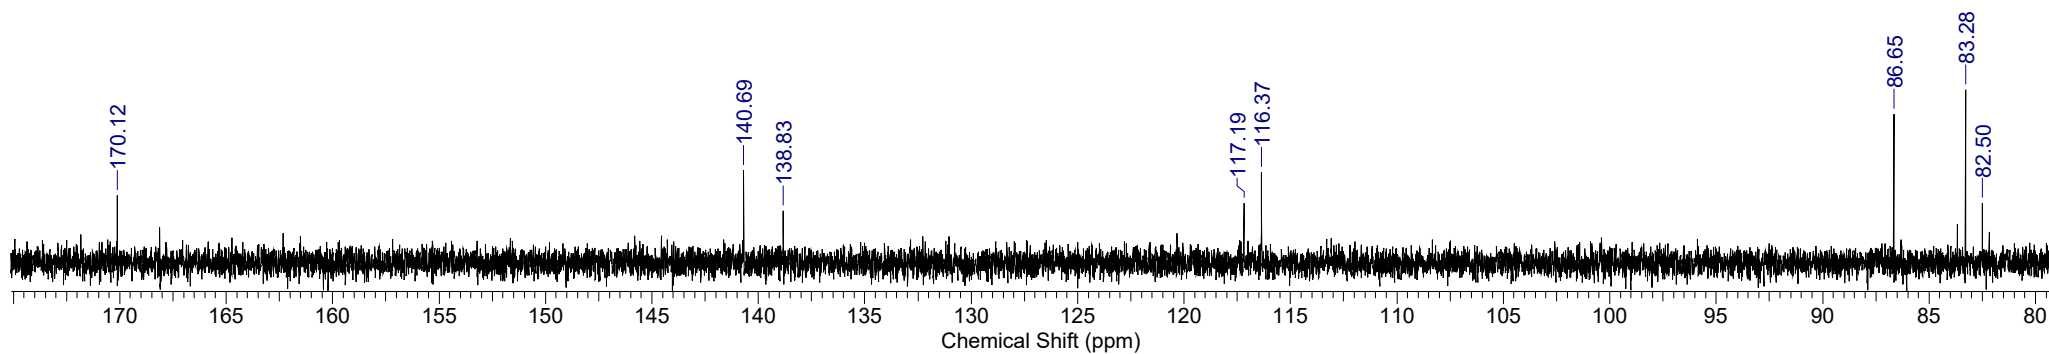

|                                                               |                    |
|---------------------------------------------------------------|--------------------|
| <b>Formula</b> C <sub>16</sub> H <sub>16</sub> O <sub>6</sub> | <b>FW</b> 304.2946 |
|---------------------------------------------------------------|--------------------|

|                                        |                                                          |                                        |
|----------------------------------------|----------------------------------------------------------|----------------------------------------|
| <b>Acquisition Time (sec)</b> 0.6921   | <b>Comment</b> single pulse decoupled gated NOE          | <b>Date</b> 12 Feb 2020 04:03:18       |
| <b>Date Stamp</b> 12 Feb 2020 03:25:06 | <b>File Name</b> C:\USERS\Лабa534\DOWNLOADS\FZ8429-1.JDF |                                        |
| <b>Frequency (MHz)</b> 150.91          | <b>Nucleus</b> 13C                                       | <b>Origin</b> ECA 600                  |
| <b>Original Points Count</b> 32768     | <b>Owner</b> Mass                                        | <b>Pulse Sequence</b> single pulse dec |
| <b>Receiver Gain</b> 56.00             | <b>Solvent</b> CHLOROFORM-d                              | <b>Spectrum Offset (Hz)</b> 15080.7979 |
| <b>Sweep Width (Hz)</b> 47348.49       | <b>Temperature (degree C)</b> 24.000                     |                                        |

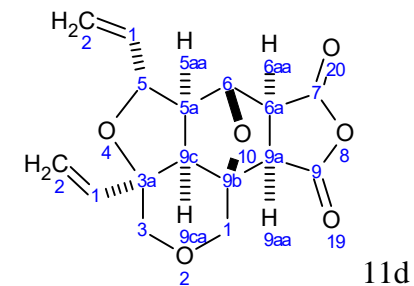

FZ8429-1.JDF

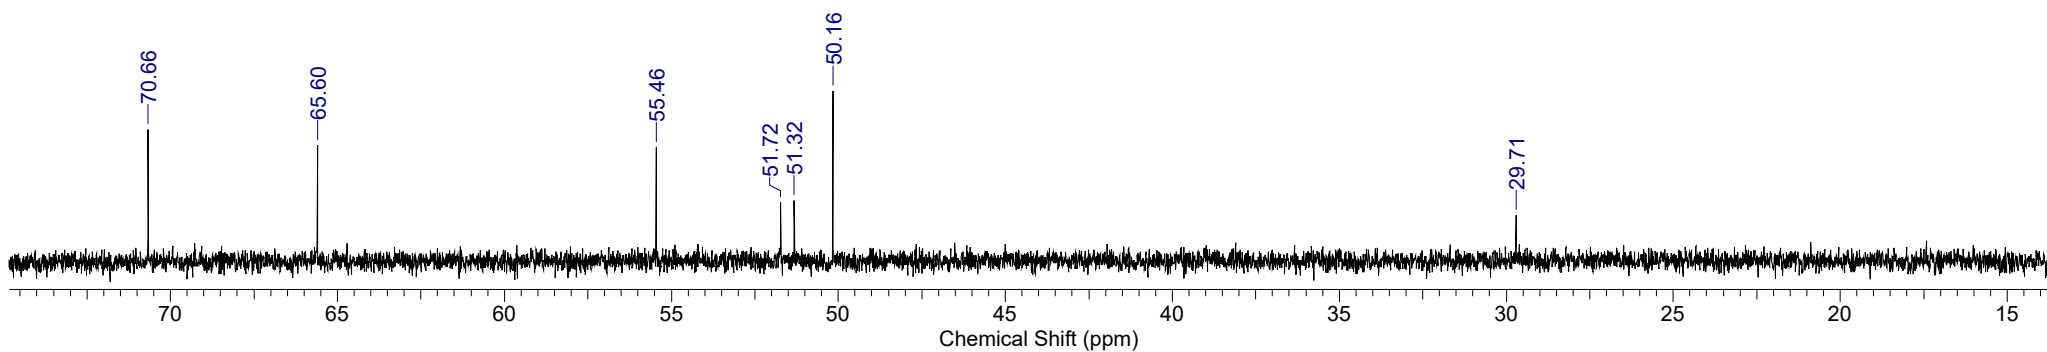

|                                                                 |                    |
|-----------------------------------------------------------------|--------------------|
| <b>Formula</b> C <sub>16</sub> H <sub>16</sub> O <sub>5</sub> S | <b>FW</b> 320.3602 |
|-----------------------------------------------------------------|--------------------|

|                                                          |                                    |                                       |                                        |
|----------------------------------------------------------|------------------------------------|---------------------------------------|----------------------------------------|
| <b>Acquisition Time (sec)</b> 1.9818                     | <b>Comment</b> single_pulse        | <b>Date</b> 21 Aug 2020 10:06:23      | <b>Date Stamp</b> 21 Aug 2020 10:07:31 |
| <b>File Name</b> C:\USERS\Лабa534\DOWNLOADS\FZ9034-1.JDF | <b>Frequency (MHz)</b> 600.17      | <b>Nucleus</b> 1H                     | <b>Number of Transients</b> 8          |
| <b>Origin</b> ECA 600                                    | <b>Original Points Count</b> 32768 | <b>Owner</b> CKP                      | <b>Pulse Sequence</b> single_pulse.ex2 |
| <b>Receiver Gain</b> 46.00                               | <b>Solvent</b> CHLOROFORM-d        | <b>Spectrum Offset (Hz)</b> 5410.1226 | <b>Sweep Width (Hz)</b> 16534.39       |

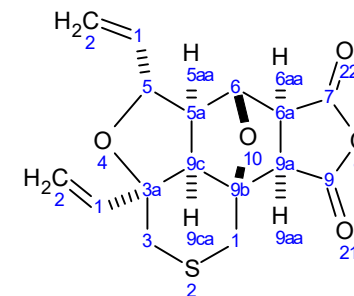

11e

FZ9034-1.ESP

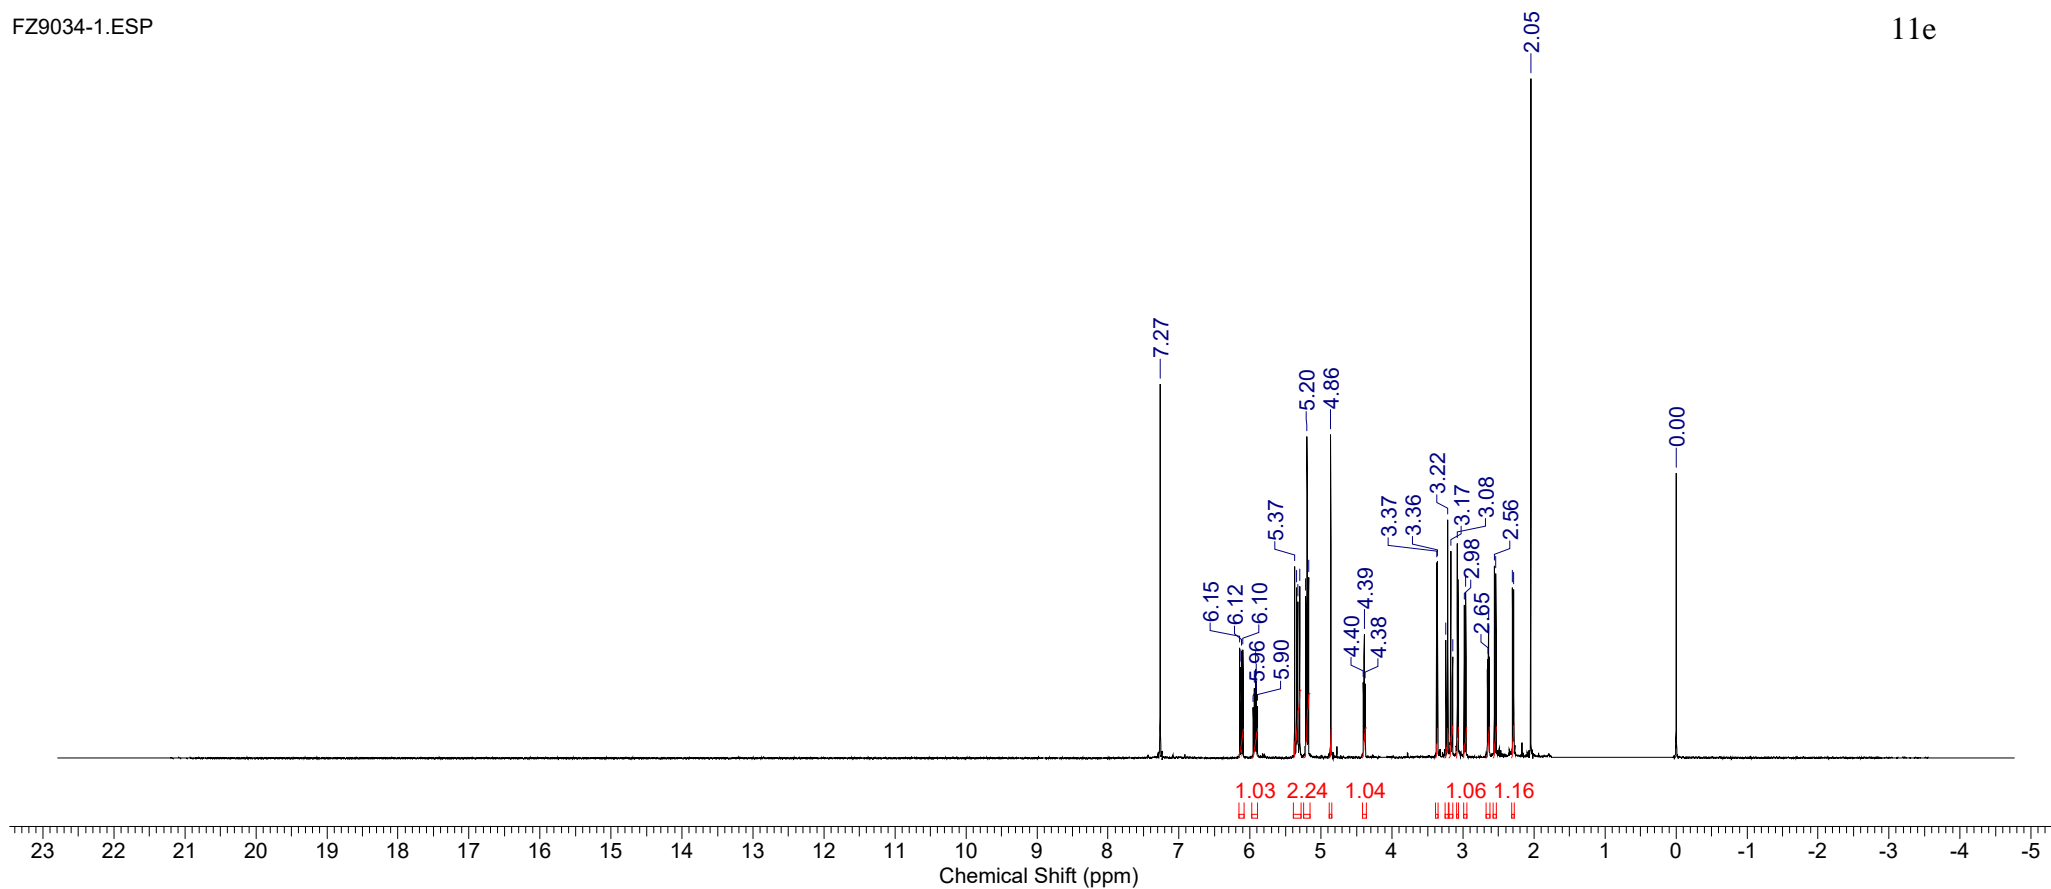



|                                                                 |                    |
|-----------------------------------------------------------------|--------------------|
| <b>Formula</b> C <sub>16</sub> H <sub>16</sub> O <sub>5</sub> S | <b>FW</b> 320.3602 |
|-----------------------------------------------------------------|--------------------|

|                                                          |                                    |                                       |                                        |
|----------------------------------------------------------|------------------------------------|---------------------------------------|----------------------------------------|
| <b>Acquisition Time (sec)</b> 1.9818                     | <b>Comment</b> single_pulse        | <b>Date</b> 21 Aug 2020 10:06:23      | <b>Date Stamp</b> 21 Aug 2020 10:07:31 |
| <b>File Name</b> C:\USERS\Лабa534\DOWNLOADS\FZ9034-1.JDF | <b>Frequency (MHz)</b> 600.17      | <b>Nucleus</b> 1H                     | <b>Number of Transients</b> 8          |
| <b>Origin</b> ECA 600                                    | <b>Original Points Count</b> 32768 | <b>Owner</b> CKP                      | <b>Pulse Sequence</b> single_pulse.ex2 |
| <b>Receiver Gain</b> 46.00                               | <b>Solvent</b> CHLOROFORM-d        | <b>Spectrum Offset (Hz)</b> 5410.1226 | <b>Sweep Width (Hz)</b> 16534.39       |



11e

FZ9034-1.ESP

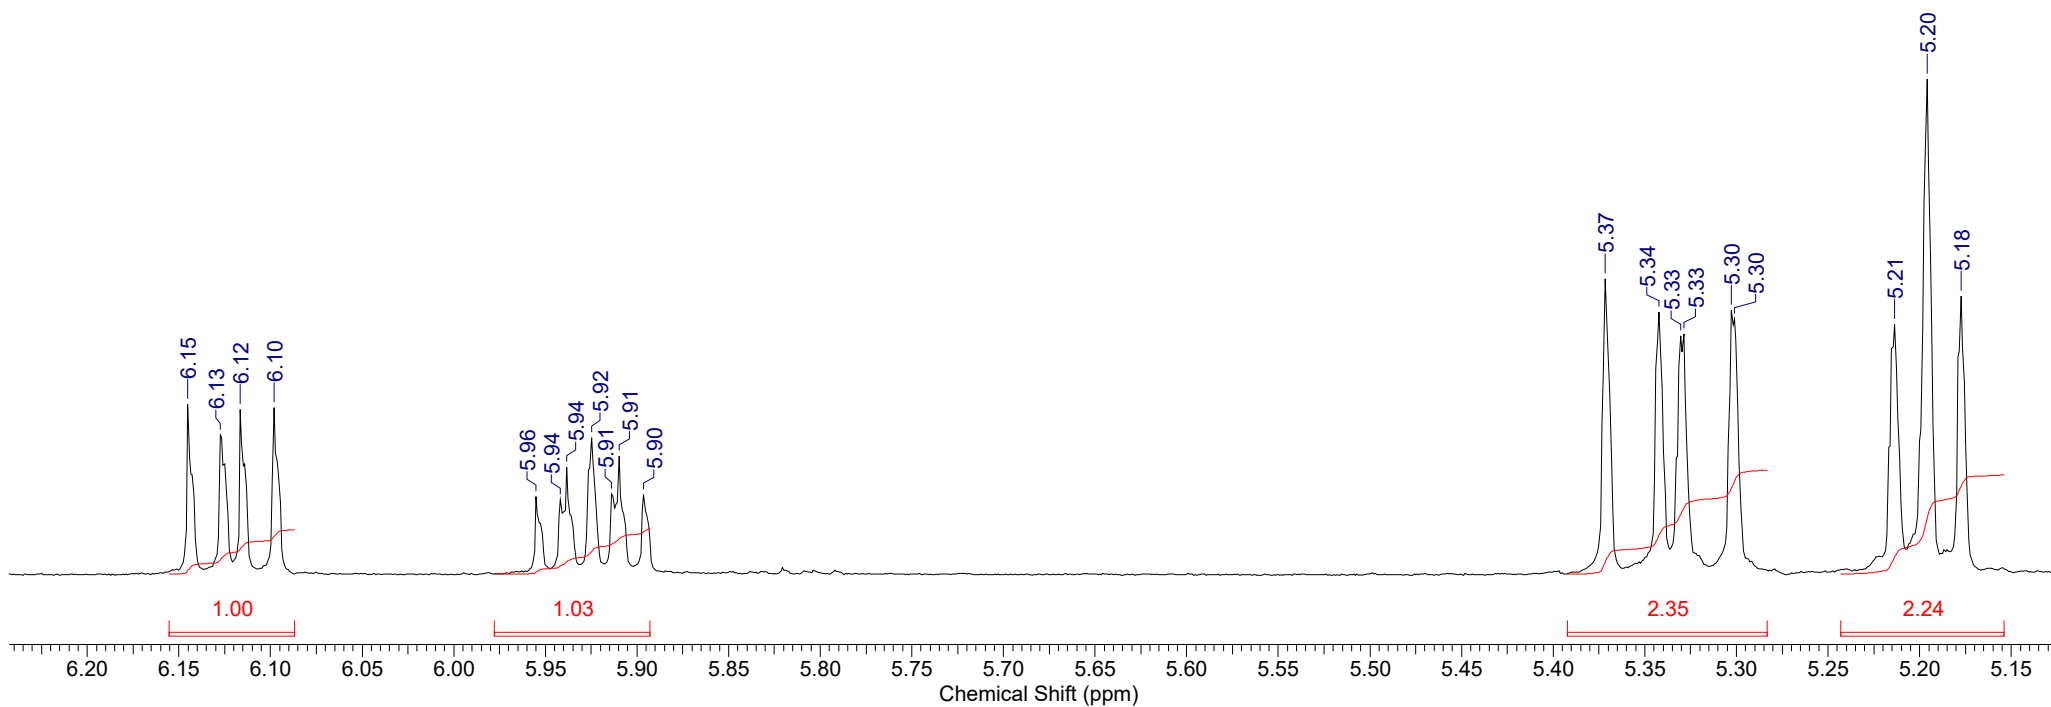

|                                                                 |                    |
|-----------------------------------------------------------------|--------------------|
| <b>Formula</b> C <sub>16</sub> H <sub>16</sub> O <sub>5</sub> S | <b>FW</b> 320.3602 |
|-----------------------------------------------------------------|--------------------|

|                                                          |                                    |                                       |                                        |
|----------------------------------------------------------|------------------------------------|---------------------------------------|----------------------------------------|
| <b>Acquisition Time (sec)</b> 1.9818                     | <b>Comment</b> single_pulse        | <b>Date</b> 21 Aug 2020 10:06:23      | <b>Date Stamp</b> 21 Aug 2020 10:07:31 |
| <b>File Name</b> C:\USERS\Лабa534\DOWNLOADS\FZ9034-1.JDF | <b>Frequency (MHz)</b> 600.17      | <b>Nucleus</b> 1H                     | <b>Number of Transients</b> 8          |
| <b>Origin</b> ECA 600                                    | <b>Original Points Count</b> 32768 | <b>Owner</b> CKP                      | <b>Pulse Sequence</b> single_pulse.ex2 |
| <b>Receiver Gain</b> 46.00                               | <b>Solvent</b> CHLOROFORM-d        | <b>Spectrum Offset (Hz)</b> 5410.1226 | <b>Sweep Width (Hz)</b> 16534.39       |



11e

FZ9034-1.ESP

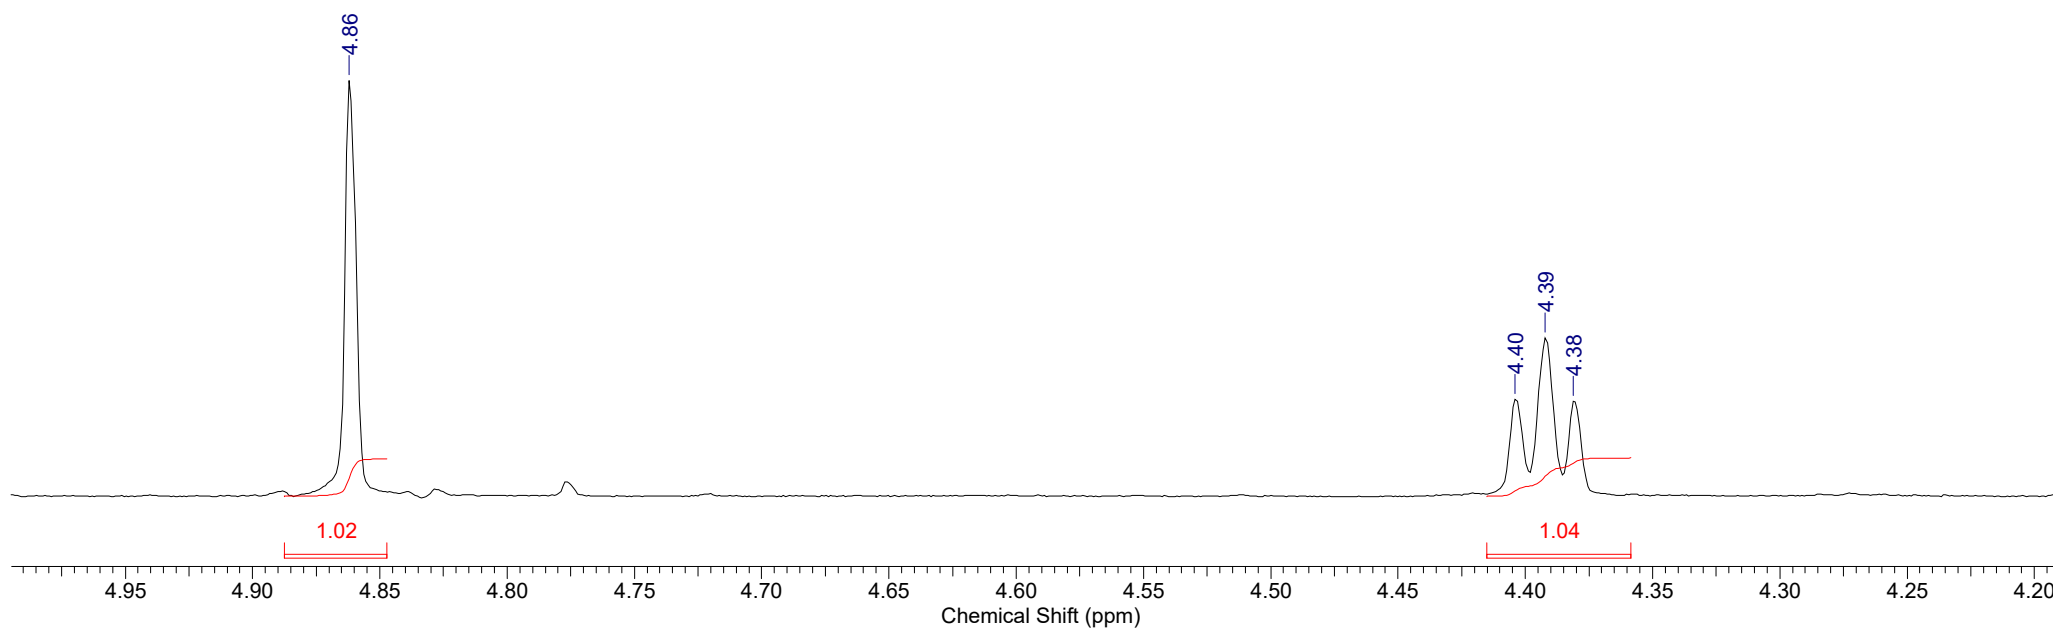

|                                                                 |                    |
|-----------------------------------------------------------------|--------------------|
| <b>Formula</b> C <sub>16</sub> H <sub>16</sub> O <sub>5</sub> S | <b>FW</b> 320.3602 |
|-----------------------------------------------------------------|--------------------|

|                                                          |                                    |                                       |                                        |
|----------------------------------------------------------|------------------------------------|---------------------------------------|----------------------------------------|
| <b>Acquisition Time (sec)</b> 1.9818                     | <b>Comment</b> single_pulse        | <b>Date</b> 21 Aug 2020 10:06:23      | <b>Date Stamp</b> 21 Aug 2020 10:07:31 |
| <b>File Name</b> C:\USERS\Лабa534\DOWNLOADS\FZ9034-1.JDF | <b>Frequency (MHz)</b> 600.17      | <b>Nucleus</b> 1H                     | <b>Number of Transients</b> 8          |
| <b>Origin</b> ECA 600                                    | <b>Original Points Count</b> 32768 | <b>Owner</b> CKP                      | <b>Pulse Sequence</b> single_pulse.ex2 |
| <b>Receiver Gain</b> 46.00                               | <b>Solvent</b> CHLOROFORM-d        | <b>Spectrum Offset (Hz)</b> 5410.1226 | <b>Sweep Width (Hz)</b> 16534.39       |



11e

FZ9034-1.ESP

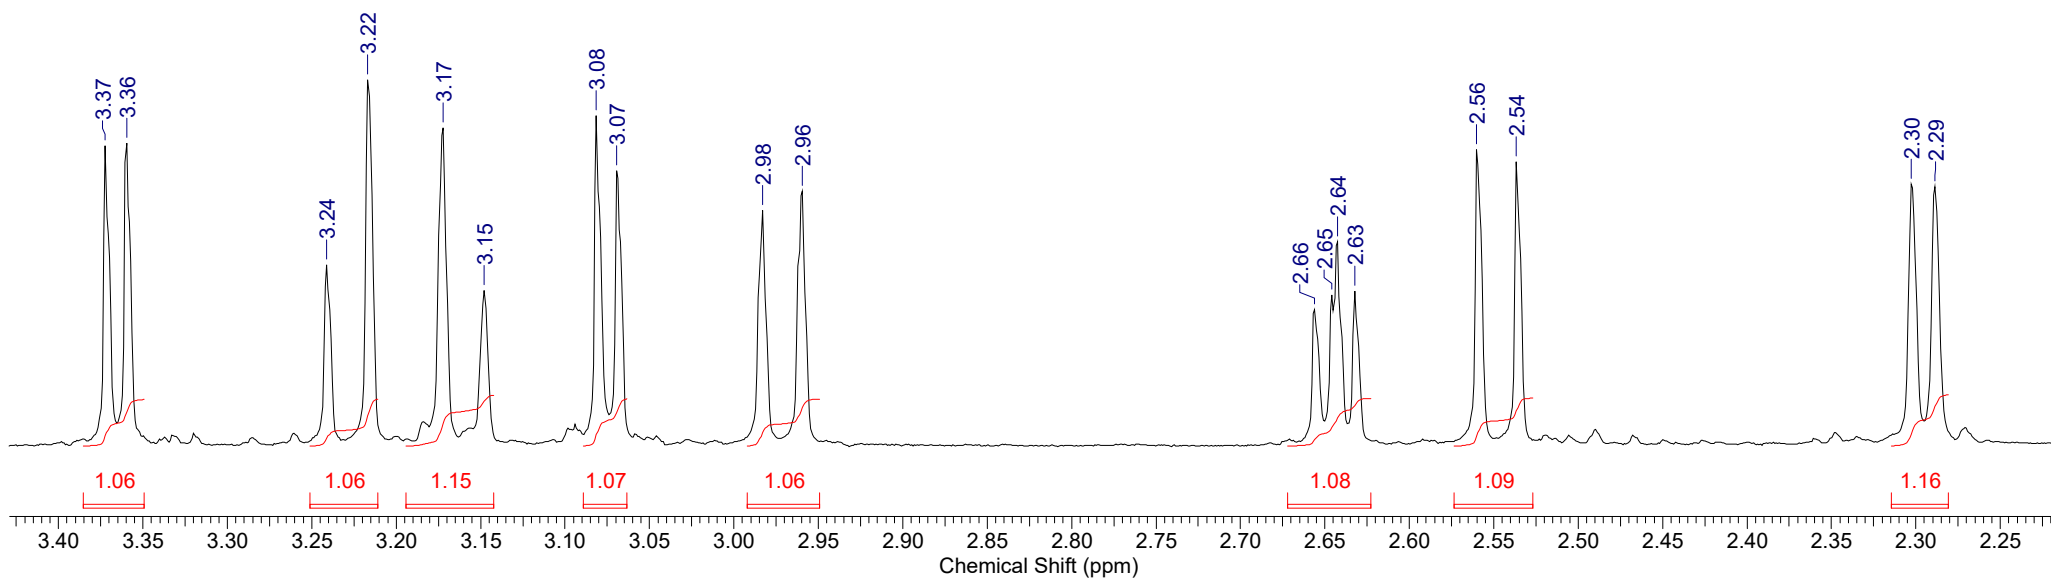

|                                                                 |                    |
|-----------------------------------------------------------------|--------------------|
| <b>Formula</b> C <sub>16</sub> H <sub>16</sub> O <sub>5</sub> S | <b>FW</b> 320.3602 |
|-----------------------------------------------------------------|--------------------|

|                                        |                                                          |                                        |
|----------------------------------------|----------------------------------------------------------|----------------------------------------|
| <b>Acquisition Time (sec)</b> 0.6921   | <b>Comment</b> single pulse decoupled gated NOE          | <b>Date</b> 24 Aug 2020 09:48:48       |
| <b>Date Stamp</b> 24 Aug 2020 09:50:01 | <b>File Name</b> C:\USERS\la6a534\DOWNLOADS\FZ9034-2.JDF |                                        |
| <b>Frequency (MHz)</b> 150.91          | <b>Nucleus</b> 13C                                       | <b>Number of Transients</b> 2001       |
| <b>Original Points Count</b> 32768     | <b>Owner</b> CKP                                         | <b>Points Count</b> 32768              |
| <b>Receiver Gain</b> 58.00             | <b>Solvent</b> CHLOROFORM-d                              | <b>Pulse Sequence</b> single pulse dec |
| <b>Sweep Width (Hz)</b> 47348.49       |                                                          | <b>Spectrum Offset (Hz)</b> 15091.3428 |

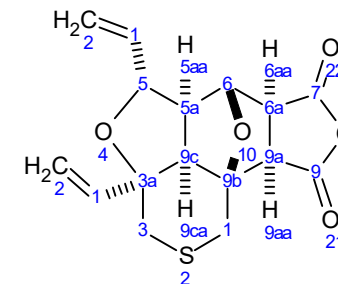

11e

FZ9034-2.JDF

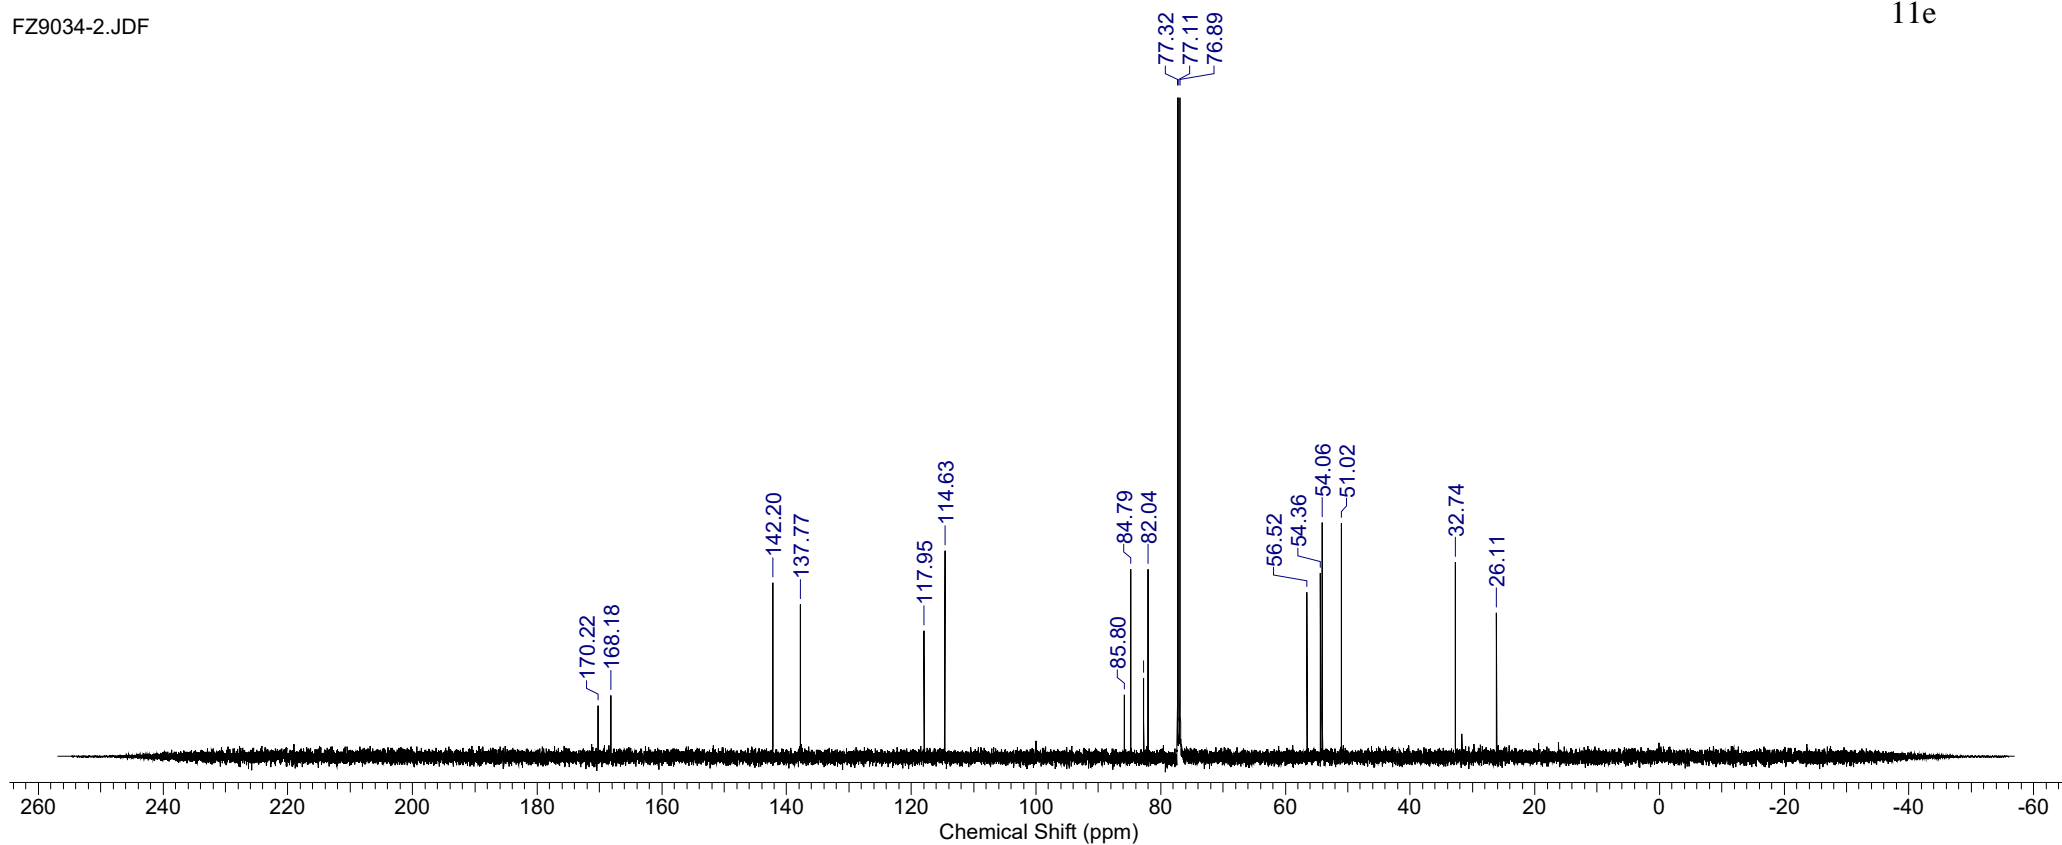

|                                                                 |                    |
|-----------------------------------------------------------------|--------------------|
| <b>Formula</b> C <sub>16</sub> H <sub>16</sub> O <sub>5</sub> S | <b>FW</b> 320.3602 |
|-----------------------------------------------------------------|--------------------|

|                                        |                                                          |                                        |
|----------------------------------------|----------------------------------------------------------|----------------------------------------|
| <b>Acquisition Time (sec)</b> 0.6921   | <b>Comment</b> single pulse decoupled gated NOE          | <b>Date</b> 24 Aug 2020 09:48:48       |
| <b>Date Stamp</b> 24 Aug 2020 09:50:01 | <b>File Name</b> C:\USERS\лa6a534\DOWNLOADS\FZ9034-2.JDF |                                        |
| <b>Frequency (MHz)</b> 150.91          | <b>Nucleus</b> 13C                                       | <b>Number of Transients</b> 2001       |
| <b>Original Points Count</b> 32768     | <b>Owner</b> CKP                                         | <b>Points Count</b> 32768              |
| <b>Receiver Gain</b> 58.00             | <b>Solvent</b> CHLOROFORM-d                              | <b>Pulse Sequence</b> single pulse dec |
| <b>Sweep Width (Hz)</b> 47348.49       |                                                          | <b>Spectrum Offset (Hz)</b> 15091.3428 |



11e

FZ9034-2.JDF

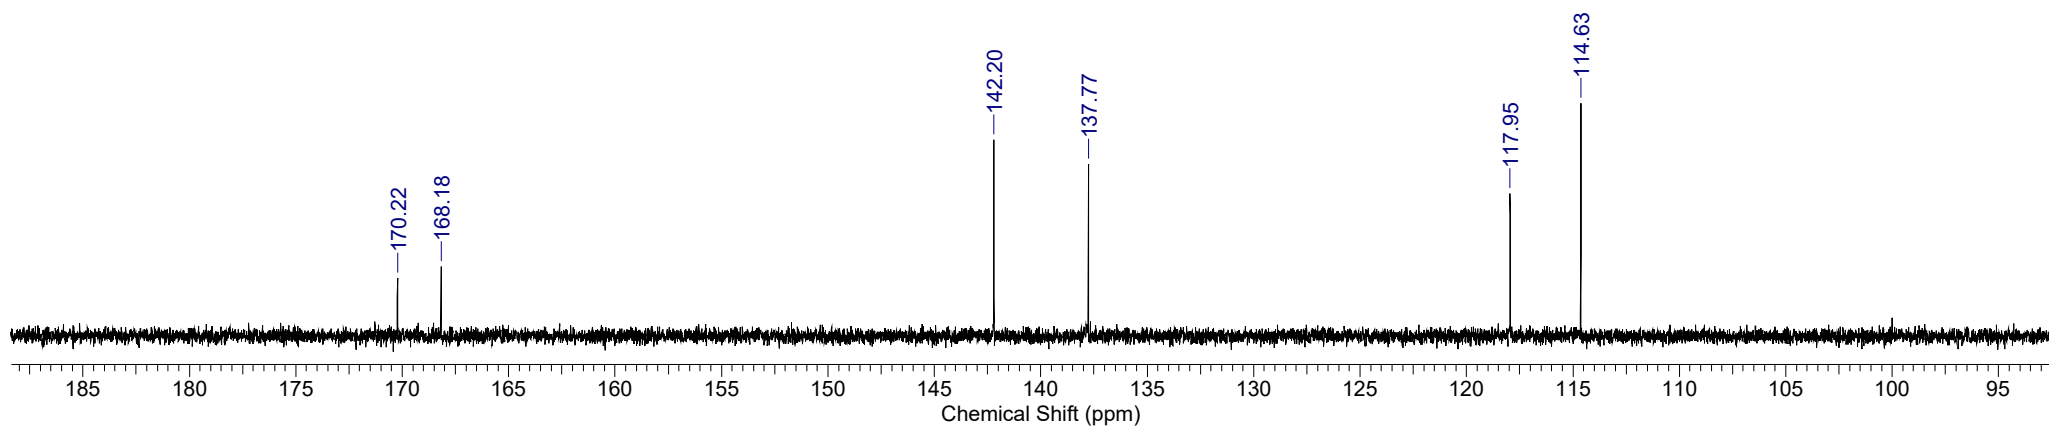

|                                                                 |                    |
|-----------------------------------------------------------------|--------------------|
| <b>Formula</b> C <sub>16</sub> H <sub>16</sub> O <sub>5</sub> S | <b>FW</b> 320.3602 |
|-----------------------------------------------------------------|--------------------|

|                                        |                                                          |                                        |
|----------------------------------------|----------------------------------------------------------|----------------------------------------|
| <b>Acquisition Time (sec)</b> 0.6921   | <b>Comment</b> single pulse decoupled gated NOE          | <b>Date</b> 24 Aug 2020 09:48:48       |
| <b>Date Stamp</b> 24 Aug 2020 09:50:01 | <b>File Name</b> C:\USERS\la6a534\DOWNLOADS\FZ9034-2.JDF |                                        |
| <b>Frequency (MHz)</b> 150.91          | <b>Nucleus</b> 13C                                       | <b>Number of Transients</b> 2001       |
| <b>Original Points Count</b> 32768     | <b>Owner</b> CKP                                         | <b>Points Count</b> 32768              |
| <b>Receiver Gain</b> 58.00             | <b>Solvent</b> CHLOROFORM-d                              | <b>Pulse Sequence</b> single pulse dec |
| <b>Sweep Width (Hz)</b> 47348.49       |                                                          | <b>Spectrum Offset (Hz)</b> 15091.3428 |



11e

FZ9034-2.JDF

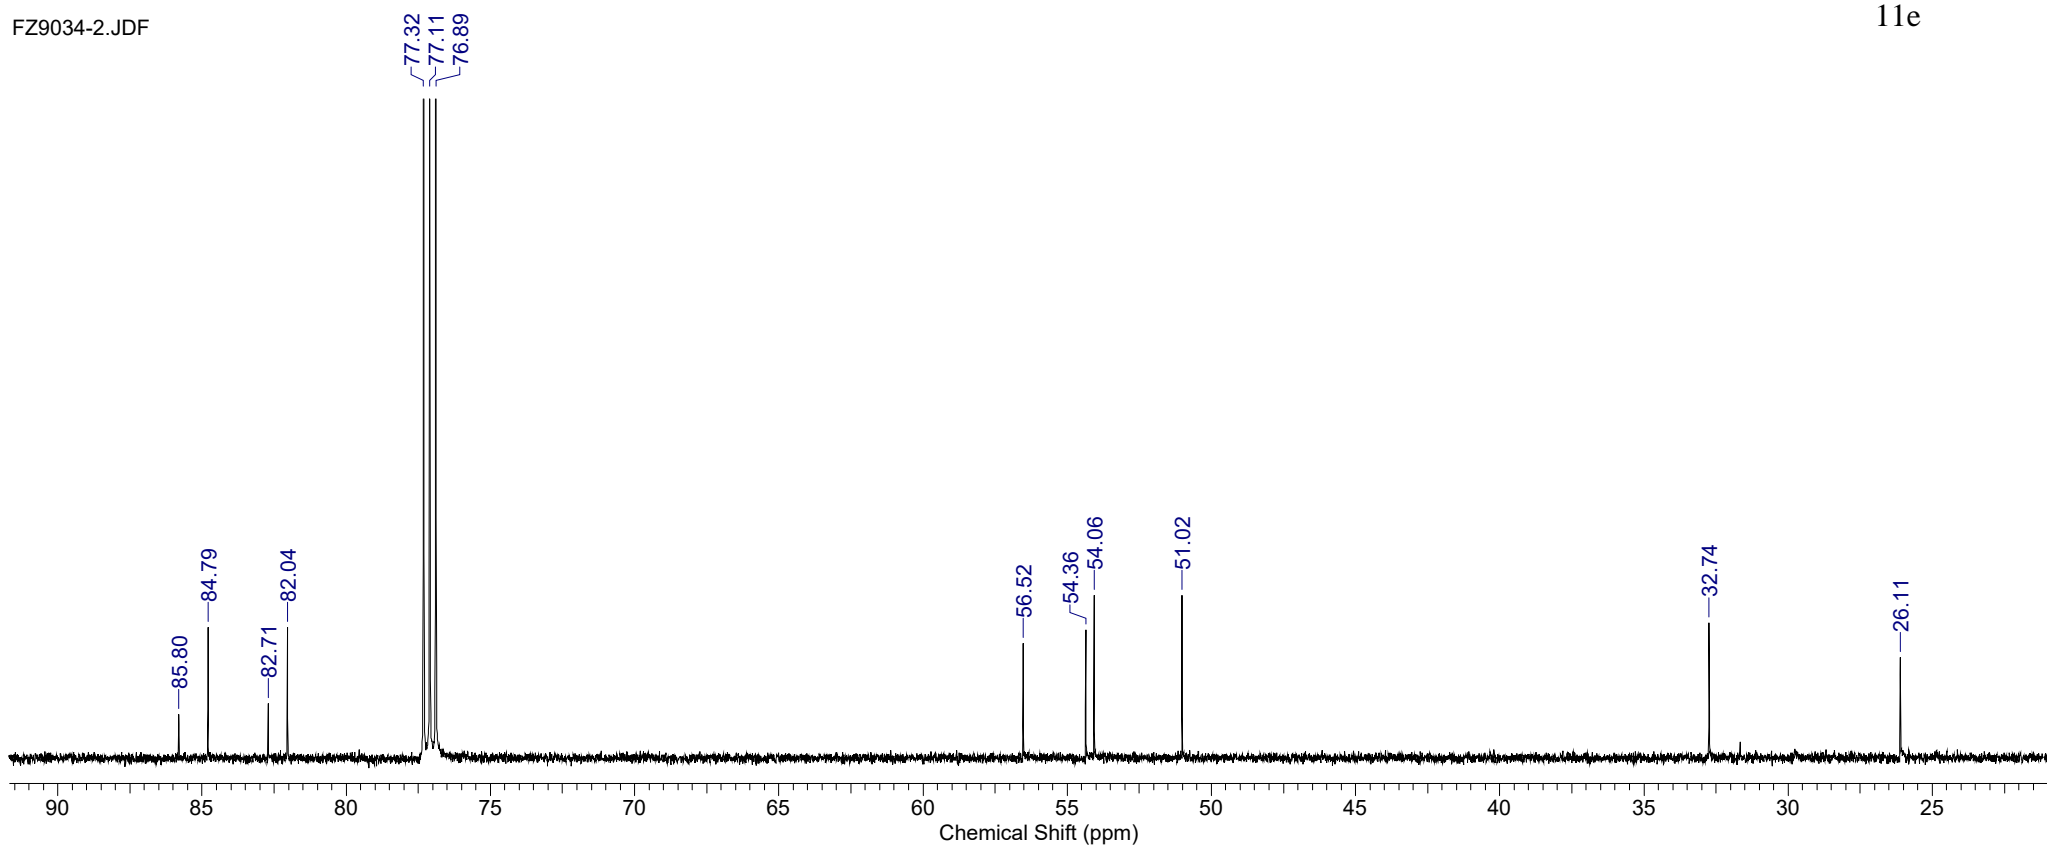

Formula C<sub>17</sub>H<sub>19</sub>NO<sub>6</sub>S FW 365.4009

|                        |                      |                      |                                          |                        |                      |                       |              |
|------------------------|----------------------|----------------------|------------------------------------------|------------------------|----------------------|-----------------------|--------------|
| Acquisition Time (sec) | 1.9818               | Comment              | single pulse                             | Date                   | 14 Jan 2020 12:32:45 | Frequency (MHz)       | 600.17       |
| Date Stamp             | 14 Jan 2020 11:52:03 | File Name            | C:\USERS\П1а6а534\DOWNLOADS\FZ8335-1.JDF |                        |                      | Owner                 | delta        |
| Nucleus                | 1H                   | Number of Transients | 8                                        | Origin                 | ECA 600              | Original Points Count | 32768        |
| Points Count           | 32768                | Pulse Sequence       | single_pulse.ex2                         | Receiver Gain          | 52.00                | Solvent               | CHLOROFORM-d |
| Spectrum Offset (Hz)   | 5409.6182            | Sweep Width (Hz)     | 16534.39                                 | Temperature (degree C) | 22.400               |                       |              |

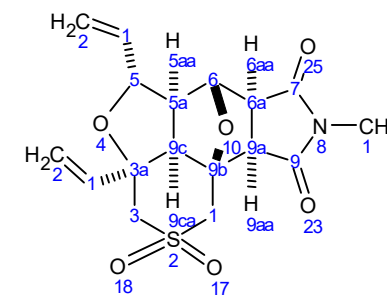

FZ8335-1.JDF

12a

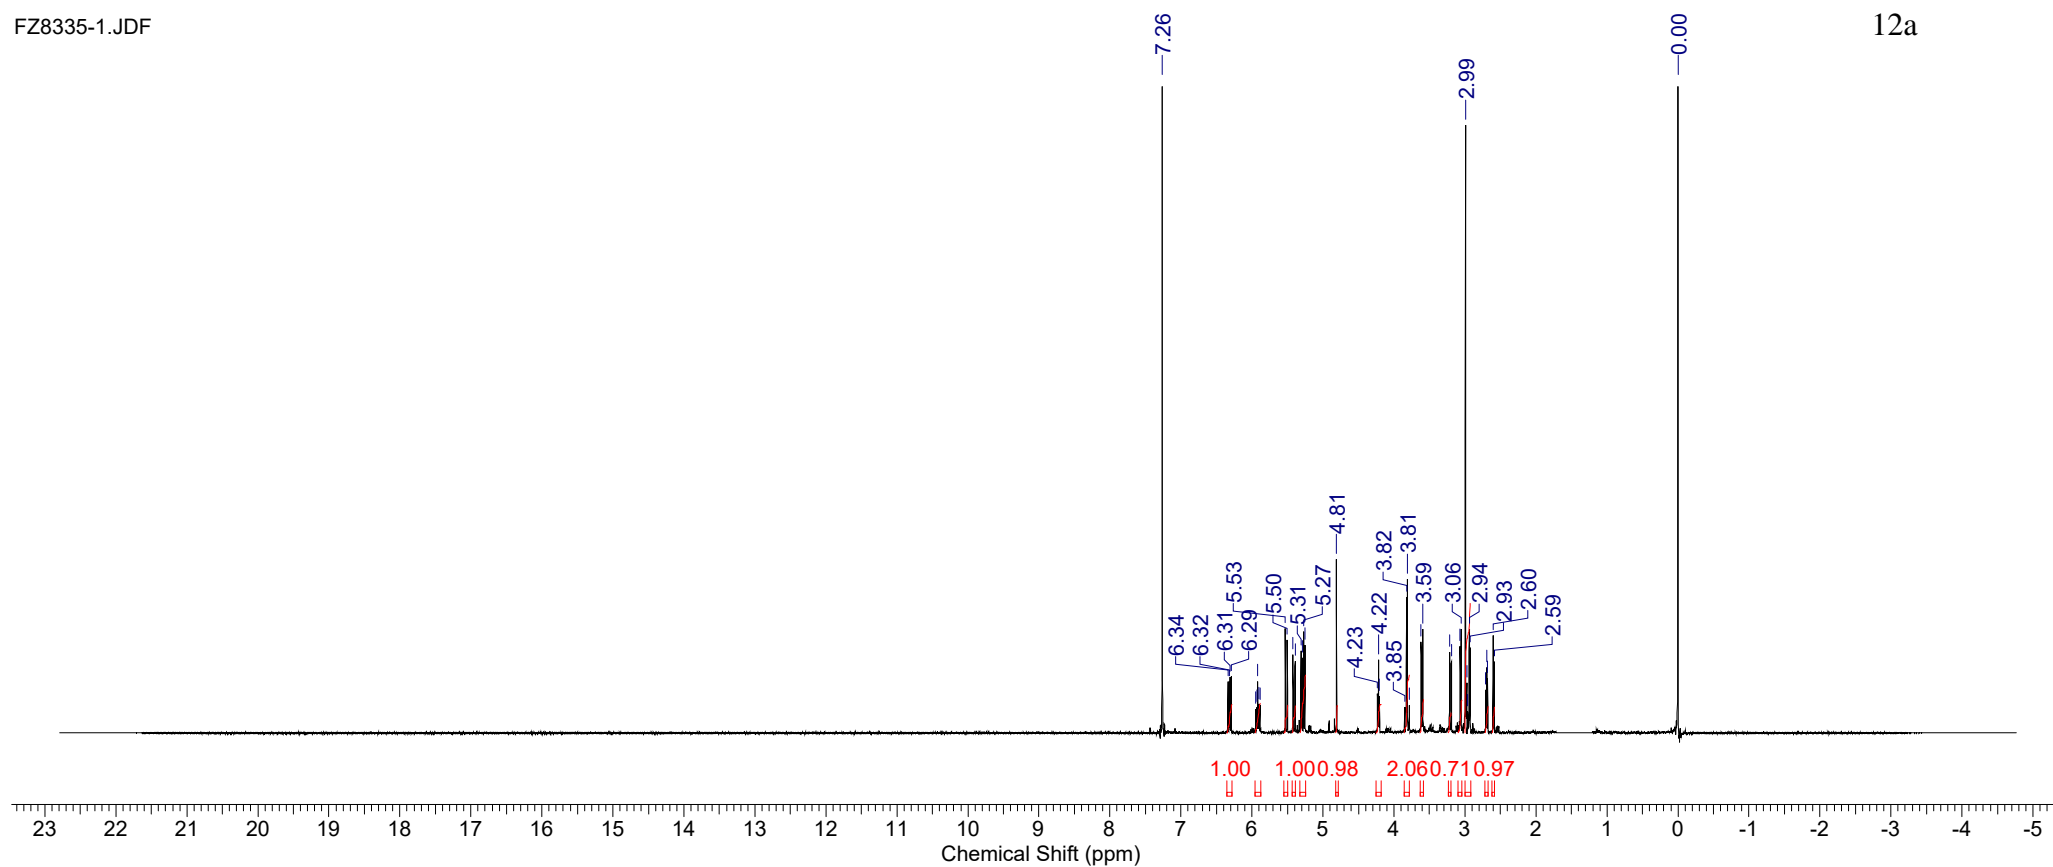

**Formula** C<sub>17</sub>H<sub>19</sub>NO<sub>6</sub>S **FW** 365.4009

|                               |                      |                             |                                          |                               |                      |                              |              |
|-------------------------------|----------------------|-----------------------------|------------------------------------------|-------------------------------|----------------------|------------------------------|--------------|
| <b>Acquisition Time (sec)</b> | 1.9818               | <b>Comment</b>              | single pulse                             | <b>Date</b>                   | 14 Jan 2020 12:32:45 | <b>Frequency (MHz)</b>       | 600.17       |
| <b>Date Stamp</b>             | 14 Jan 2020 11:52:03 | <b>File Name</b>            | C:\USERS\Лаб6а534\DOWNLOADS\FZ8335-1.JDF |                               |                      | <b>Owner</b>                 | delta        |
| <b>Nucleus</b>                | 1H                   | <b>Number of Transients</b> | 8                                        | <b>Origin</b>                 | ECA 600              | <b>Original Points Count</b> | 32768        |
| <b>Points Count</b>           | 32768                | <b>Pulse Sequence</b>       | single_pulse.ex2                         | <b>Receiver Gain</b>          | 52.00                | <b>Solvent</b>               | CHLOROFORM-d |
| <b>Spectrum Offset (Hz)</b>   | 5409.6182            | <b>Sweep Width (Hz)</b>     | 16534.39                                 | <b>Temperature (degree C)</b> | 22.400               |                              |              |



12a

FZ8335-1.JDF

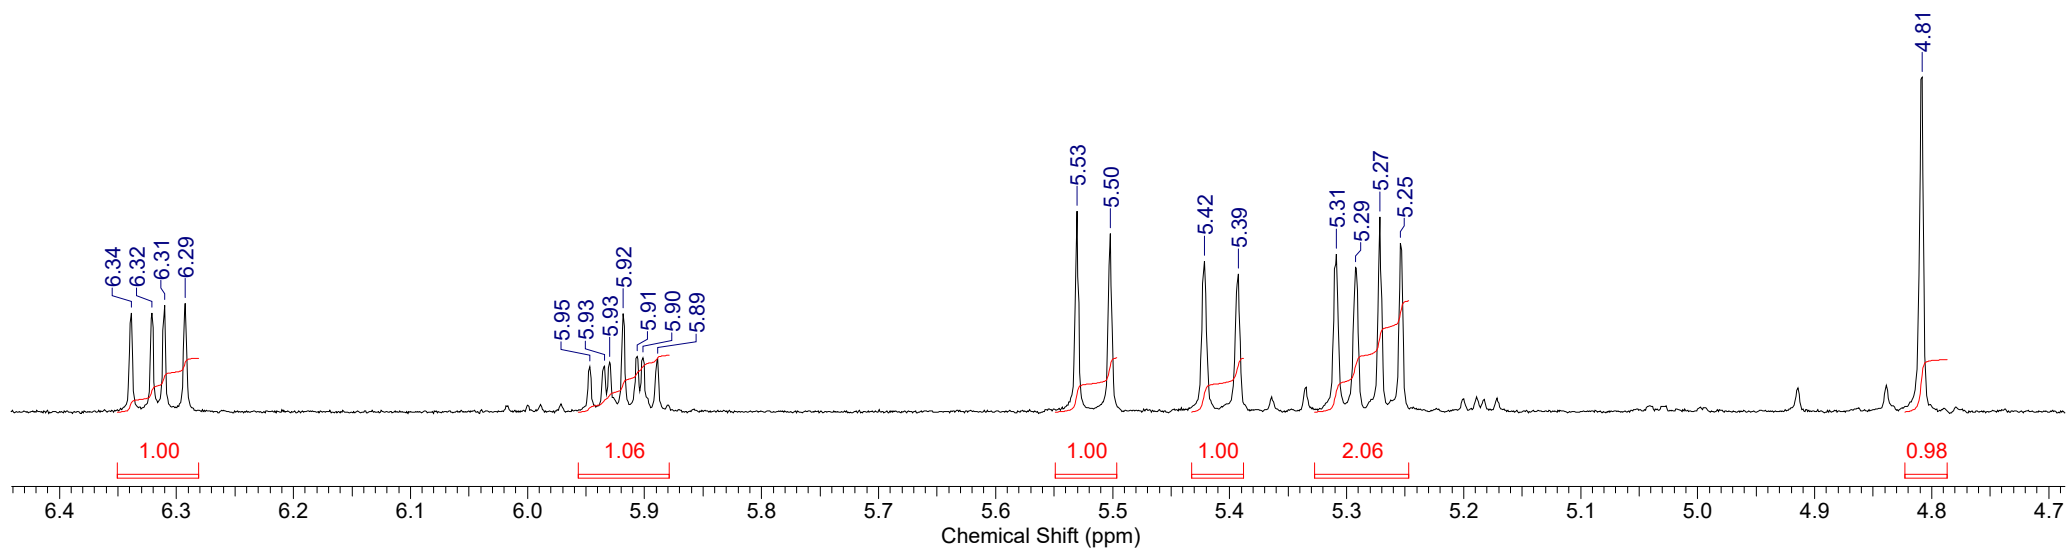



Formula C<sub>17</sub>H<sub>19</sub>NO<sub>6</sub>S FW 365.4009

|                        |                      |                      |                                         |                        |                      |                       |              |
|------------------------|----------------------|----------------------|-----------------------------------------|------------------------|----------------------|-----------------------|--------------|
| Acquisition Time (sec) | 1.9818               | Comment              | single pulse                            | Date                   | 14 Jan 2020 12:32:45 | Frequency (MHz)       | 600.17       |
| Date Stamp             | 14 Jan 2020 11:52:03 | File Name            | C:\USERS\Лабa534\DOWNLOADS\FZ8335-1.JDF |                        |                      | Owner                 | delta        |
| Nucleus                | 1H                   | Number of Transients | 8                                       | Origin                 | ECA 600              | Original Points Count | 32768        |
| Points Count           | 32768                | Pulse Sequence       | single_pulse.ex2                        | Receiver Gain          | 52.00                | Solvent               | CHLOROFORM-d |
| Spectrum Offset (Hz)   | 5409.6182            | Sweep Width (Hz)     | 16534.39                                | Temperature (degree C) | 22.400               |                       |              |



12a

FZ8335-1.JDF

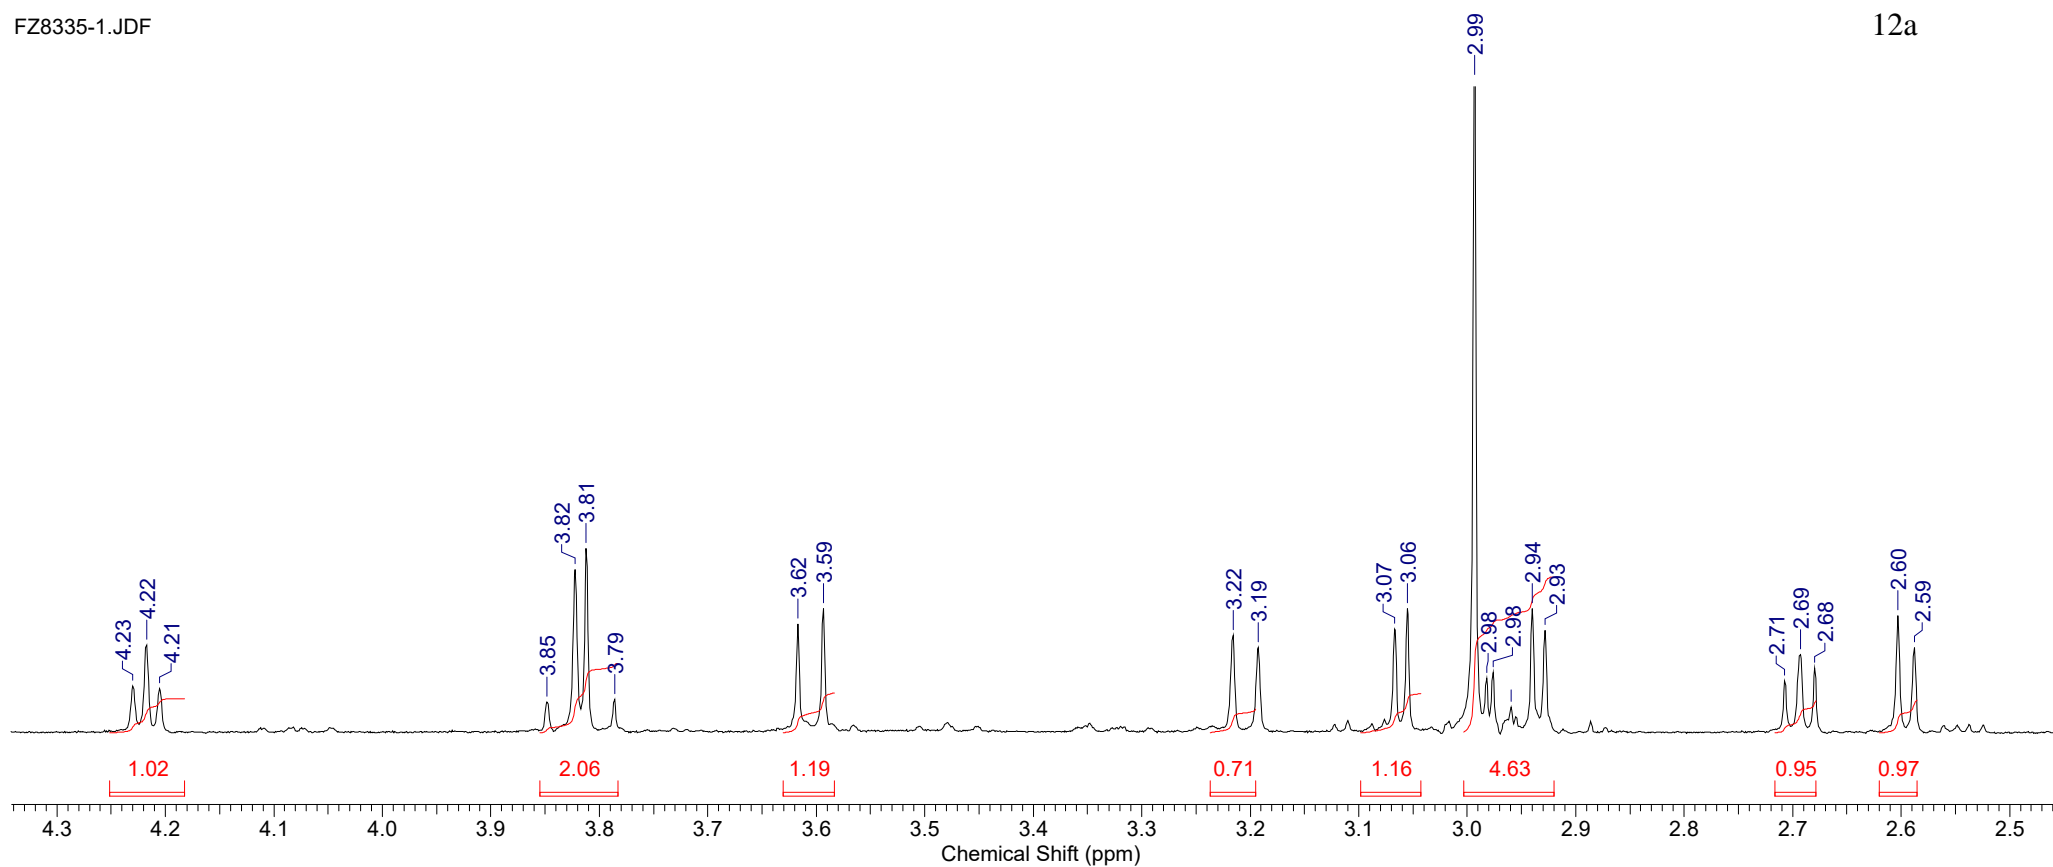

|                                                                  |                    |
|------------------------------------------------------------------|--------------------|
| <b>Formula</b> C <sub>17</sub> H <sub>19</sub> NO <sub>6</sub> S | <b>FW</b> 365.4009 |
|------------------------------------------------------------------|--------------------|

|                                        |                                                          |                                        |
|----------------------------------------|----------------------------------------------------------|----------------------------------------|
| <b>Acquisition Time (sec)</b> 0.6921   | <b>Comment</b> single pulse decoupled gated NOE          | <b>Date</b> 12 Feb 2020 04:29:43       |
| <b>Date Stamp</b> 12 Feb 2020 03:51:31 | <b>File Name</b> C:\USERS\Лa6a534\DOWNLOADS\FZ8431-1.JDF |                                        |
| <b>Frequency (MHz)</b> 150.91          | <b>Nucleus</b> 13C                                       | <b>Number of Transients</b> 1000       |
| <b>Original Points Count</b> 32768     | <b>Owner</b> Mass                                        | <b>Points Count</b> 32768              |
| <b>Receiver Gain</b> 54.00             | <b>Solvent</b> CHLOROFORM-d                              | <b>Pulse Sequence</b> single pulse dec |
| <b>Sweep Width (Hz)</b> 47348.49       | <b>Temperature (degree C)</b> 23.800                     | <b>Spectrum Offset (Hz)</b> 15091.3428 |

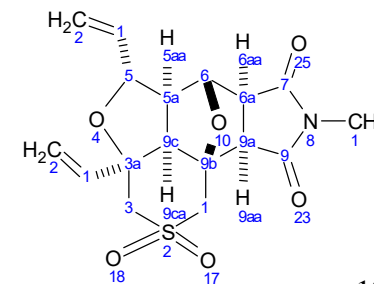

12a

FZ8431-1.JDF

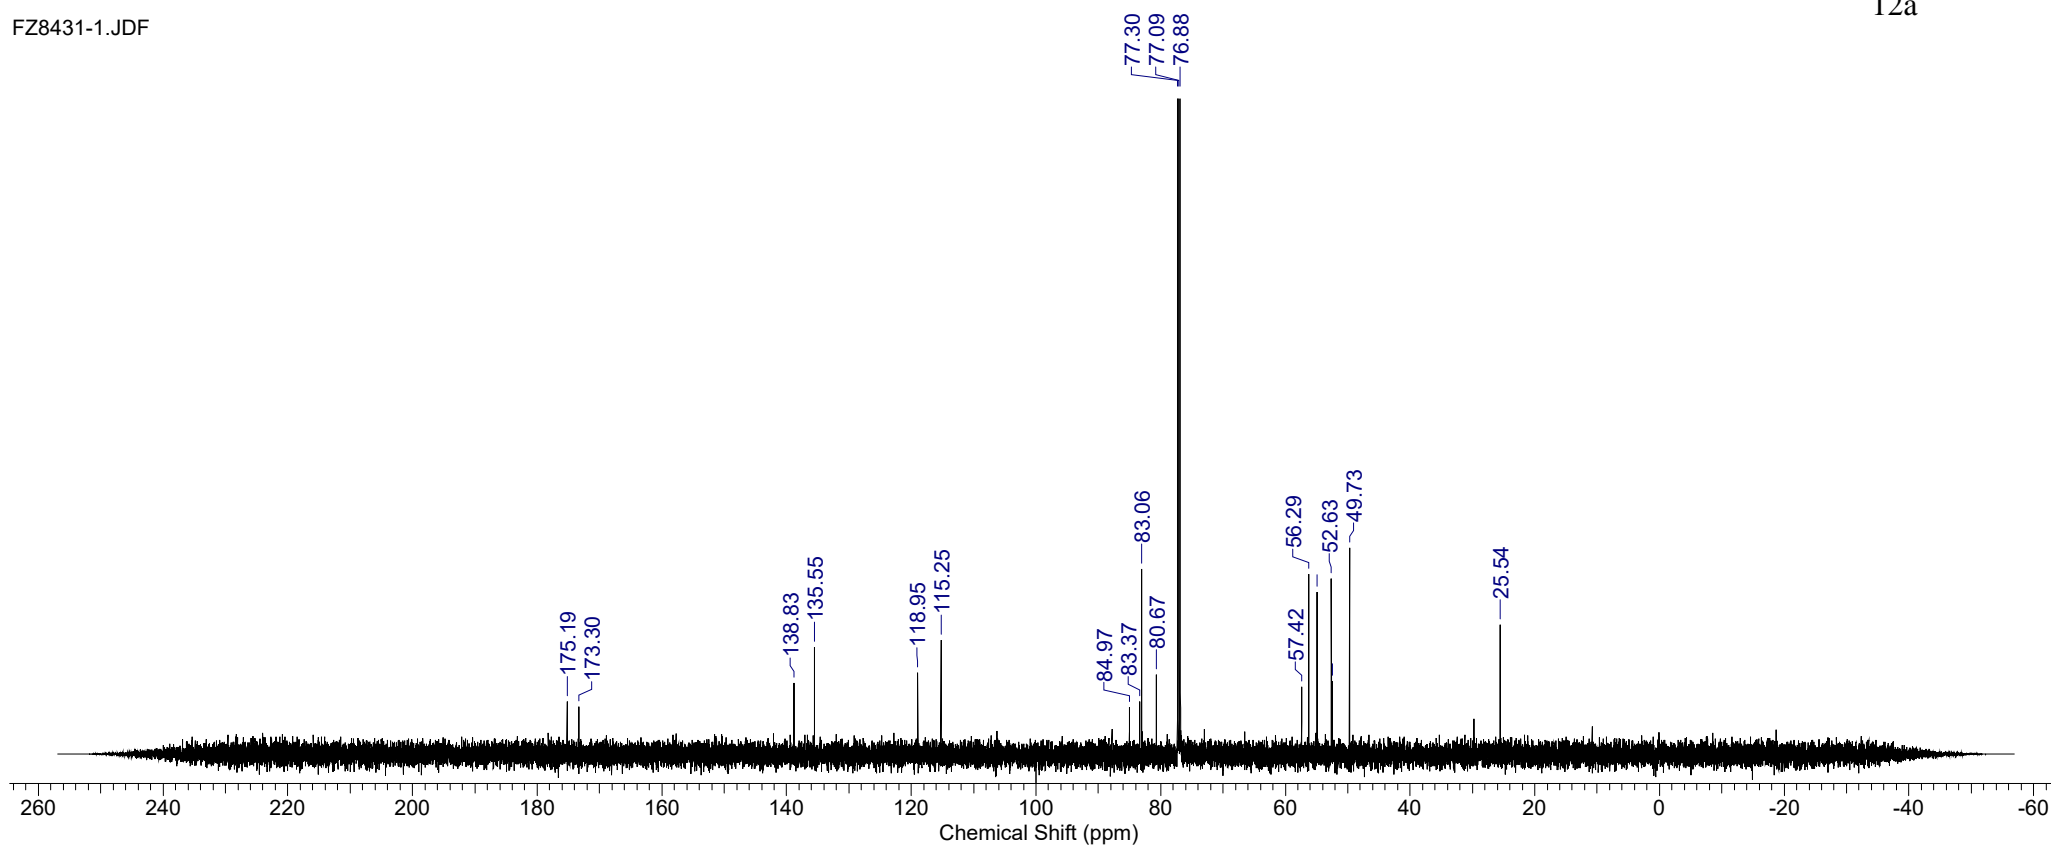

|                                                                  |                    |
|------------------------------------------------------------------|--------------------|
| <b>Formula</b> C <sub>17</sub> H <sub>19</sub> NO <sub>6</sub> S | <b>FW</b> 365.4009 |
|------------------------------------------------------------------|--------------------|

|                                        |                                                          |                                        |
|----------------------------------------|----------------------------------------------------------|----------------------------------------|
| <b>Acquisition Time (sec)</b> 0.6921   | <b>Comment</b> single pulse decoupled gated NOE          | <b>Date</b> 12 Feb 2020 04:29:43       |
| <b>Date Stamp</b> 12 Feb 2020 03:51:31 | <b>File Name</b> C:\USERS\Лабa534\DOWNLOADS\FZ8431-1.JDF |                                        |
| <b>Frequency (MHz)</b> 150.91          | <b>Nucleus</b> 13C                                       | <b>Number of Transients</b> 1000       |
| <b>Original Points Count</b> 32768     | <b>Owner</b> Mass                                        | <b>Points Count</b> 32768              |
| <b>Receiver Gain</b> 54.00             | <b>Solvent</b> CHLOROFORM-d                              | <b>Pulse Sequence</b> single pulse dec |
| <b>Sweep Width (Hz)</b> 47348.49       | <b>Temperature (degree C)</b> 23.800                     | <b>Spectrum Offset (Hz)</b> 15091.3428 |

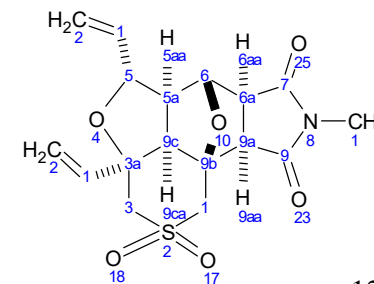

12a

FZ8431-1.JDF

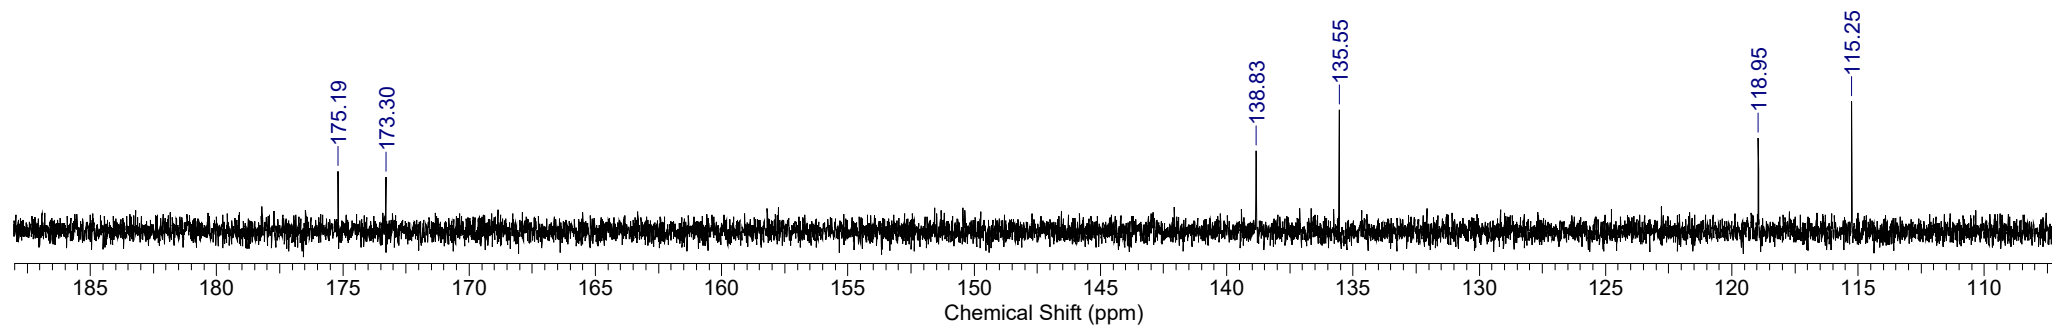

|                                                                  |                    |
|------------------------------------------------------------------|--------------------|
| <b>Formula</b> C <sub>17</sub> H <sub>19</sub> NO <sub>6</sub> S | <b>FW</b> 365.4009 |
|------------------------------------------------------------------|--------------------|

|                                        |                                                          |                                        |
|----------------------------------------|----------------------------------------------------------|----------------------------------------|
| <b>Acquisition Time (sec)</b> 0.6921   | <b>Comment</b> single pulse decoupled gated NOE          | <b>Date</b> 12 Feb 2020 04:29:43       |
| <b>Date Stamp</b> 12 Feb 2020 03:51:31 | <b>File Name</b> C:\USERS\Лa6a534\DOWNLOADS\FZ8431-1.JDF |                                        |
| <b>Frequency (MHz)</b> 150.91          | <b>Nucleus</b> 13C                                       | <b>Number of Transients</b> 1000       |
| <b>Original Points Count</b> 32768     | <b>Owner</b> Mass                                        | <b>Points Count</b> 32768              |
| <b>Receiver Gain</b> 54.00             | <b>Solvent</b> CHLOROFORM-d                              | <b>Pulse Sequence</b> single pulse dec |
| <b>Sweep Width (Hz)</b> 47348.49       | <b>Temperature (degree C)</b> 23.800                     | <b>Spectrum Offset (Hz)</b> 15091.3428 |

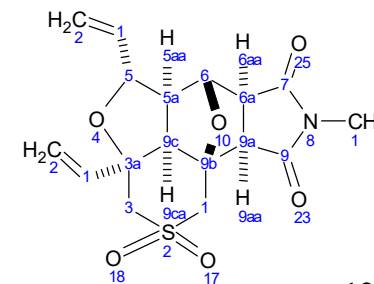

12a

FZ8431-1.JDF

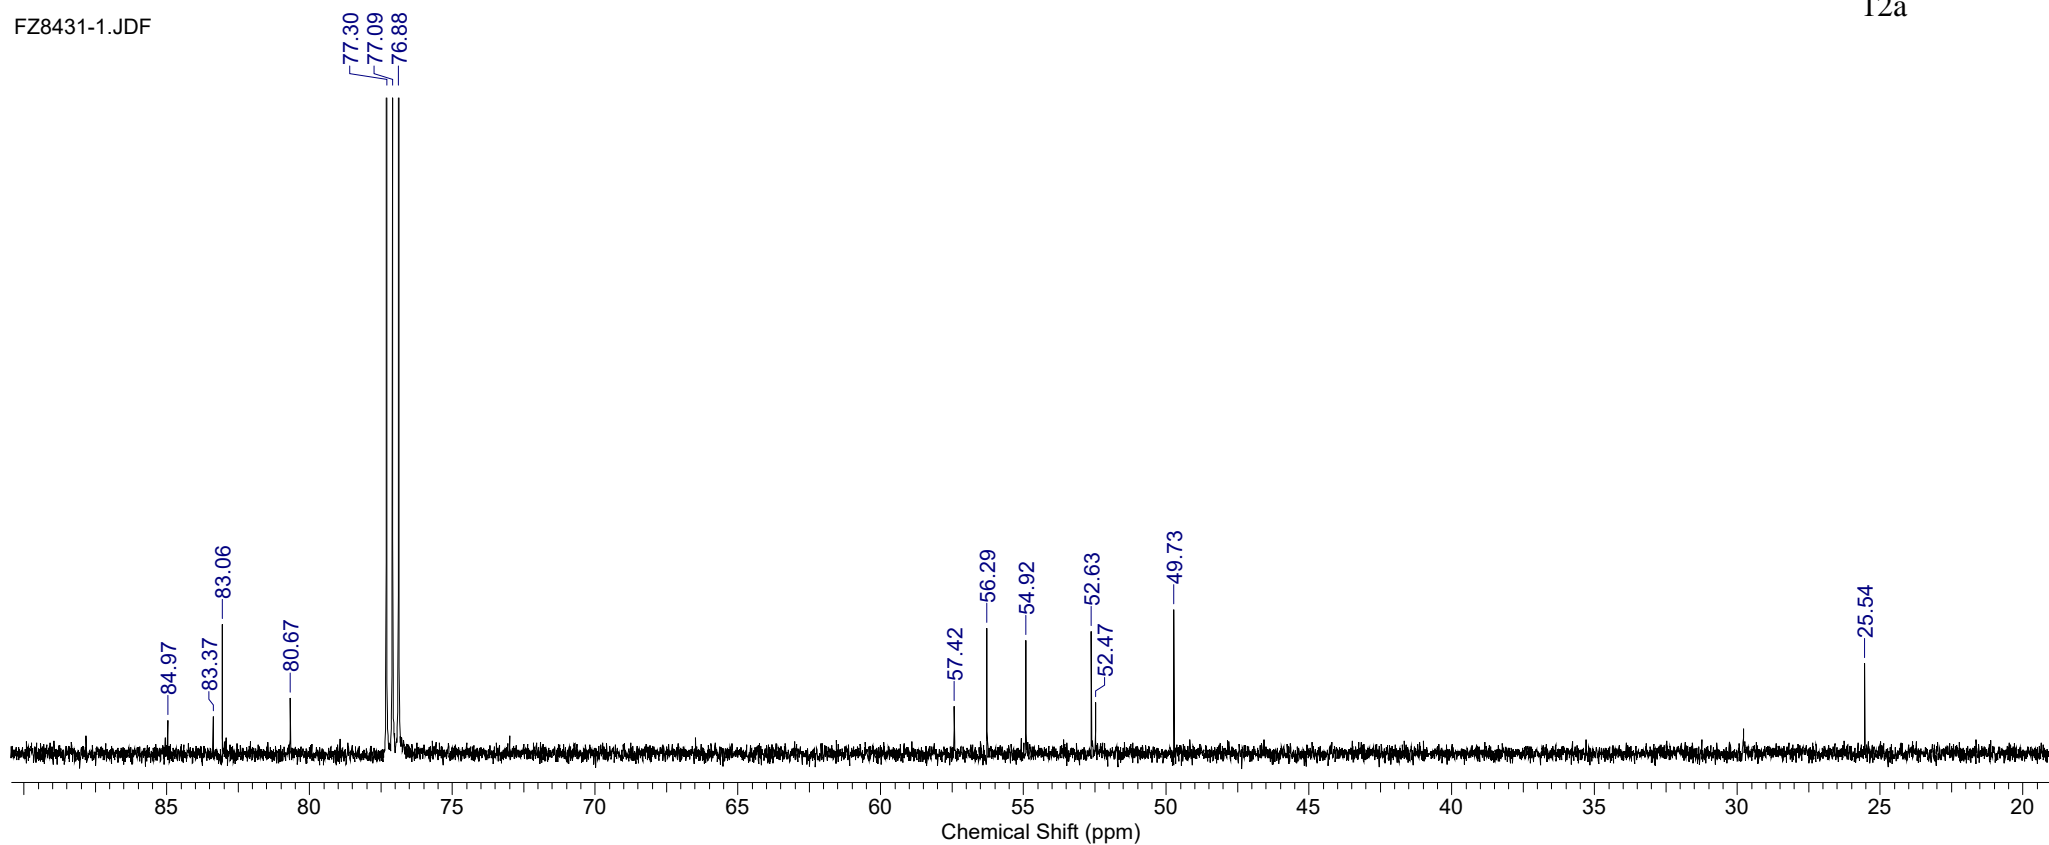

|                                                                                             |                    |
|---------------------------------------------------------------------------------------------|--------------------|
| <b>Formula</b> C <sub>20</sub> H <sub>21</sub> F <sub>3</sub> N <sub>3</sub> O <sub>5</sub> | <b>FW</b> 426.3863 |
|---------------------------------------------------------------------------------------------|--------------------|

|                                        |                                                              |                                      |                               |
|----------------------------------------|--------------------------------------------------------------|--------------------------------------|-------------------------------|
| <b>Acquisition Time (sec)</b> 0.9909   | <b>Comment</b> single_pulse                                  | <b>Date</b> 09 Feb 2020 07:40:15     | <b>Frequency (MHz)</b> 600.17 |
| <b>Date Stamp</b> 21 Feb 2020 09:25:57 | <b>File Name</b> C:\USERS\Лa6a534\DOWNLOADS\FZ8495-1 (1).JDF | <b>Original Points Count</b> 16384   | <b>Owner</b> CKP              |
| <b>Nucleus</b> 1H                      | <b>Number of Transients</b> 8                                | <b>Origin</b> ECA 600                | <b>Receiver Gain</b> 38.00    |
| <b>Points Count</b> 16384              | <b>Pulse Sequence</b> single_pulse.ex2                       | <b>Solvent</b> CHLOROFORM-d          |                               |
| <b>Spectrum Offset (Hz)</b> 5413.0630  | <b>Sweep Width (Hz)</b> 16534.39                             | <b>Temperature (degree C)</b> 23.200 |                               |

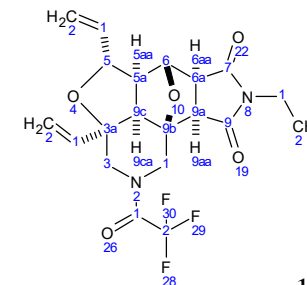

13a

FZ8495-1 PK2901.ESP

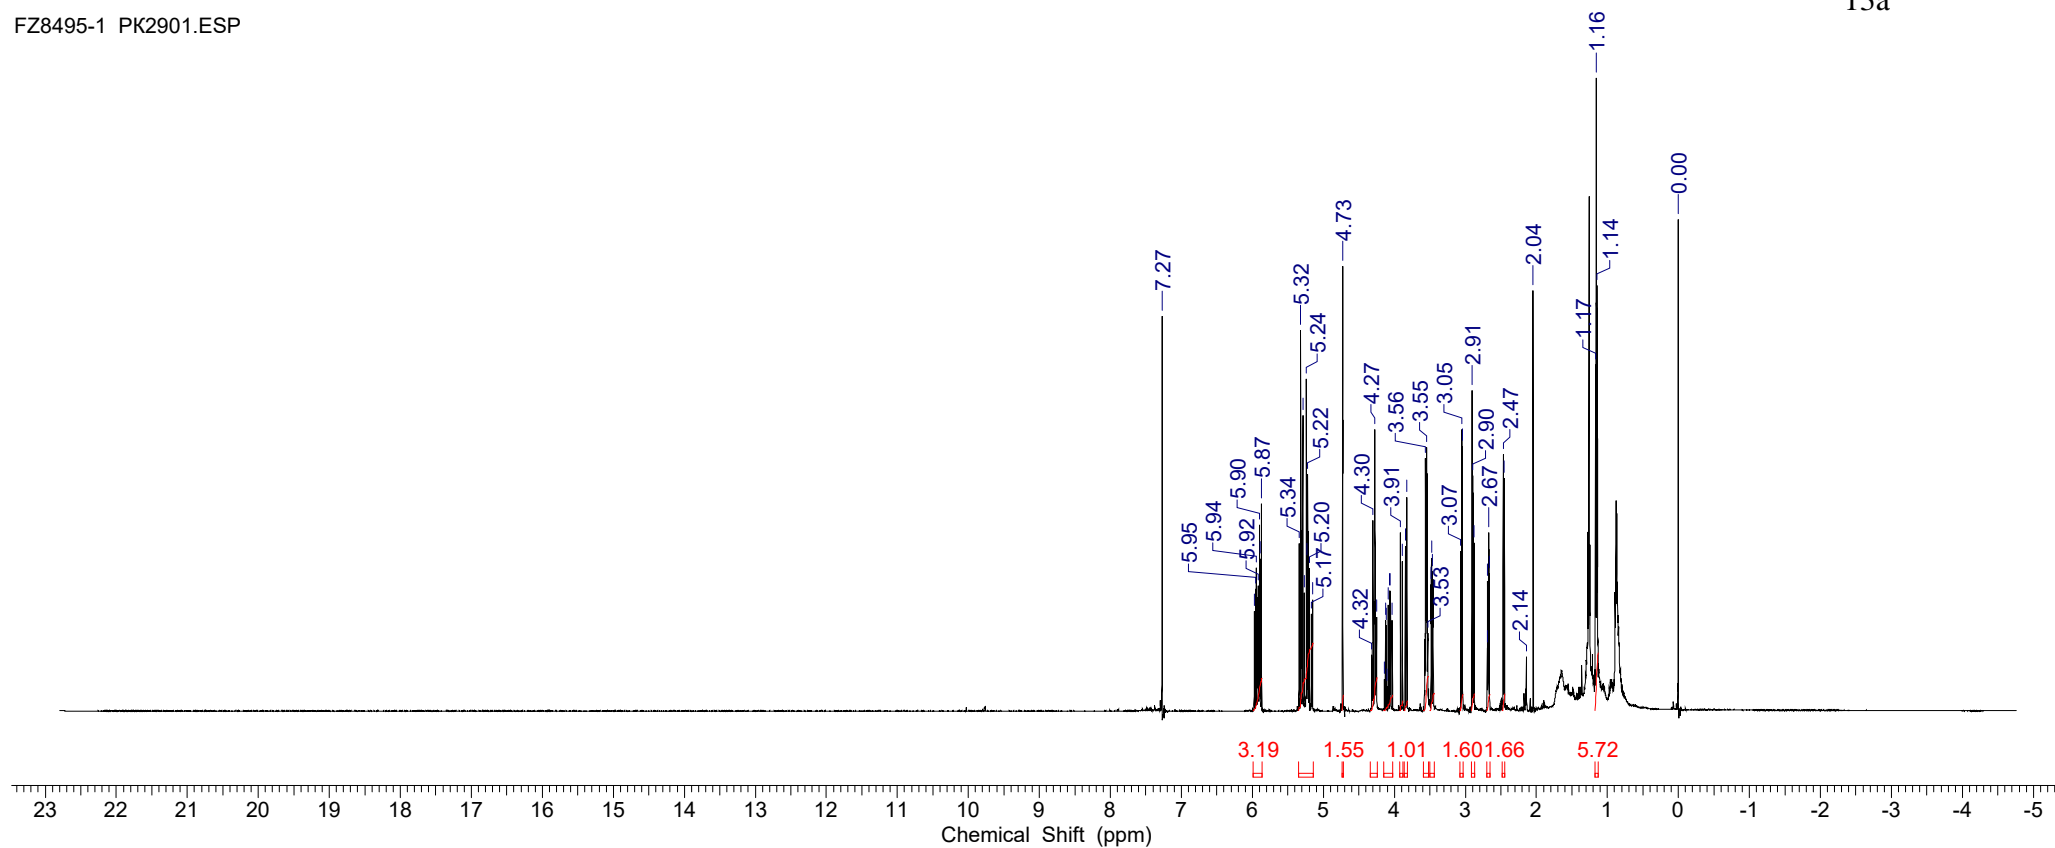

|                                                                                             |                    |
|---------------------------------------------------------------------------------------------|--------------------|
| <b>Formula</b> C <sub>20</sub> H <sub>21</sub> F <sub>3</sub> N <sub>3</sub> O <sub>5</sub> | <b>FW</b> 426.3863 |
|---------------------------------------------------------------------------------------------|--------------------|

|                                        |                                        |                                                               |                               |
|----------------------------------------|----------------------------------------|---------------------------------------------------------------|-------------------------------|
| <b>Acquisition Time (sec)</b> 0.9909   | <b>Comment</b> single_pulse            | <b>Date</b> 09 Feb 2020 07:40:15                              | <b>Frequency (MHz)</b> 600.17 |
| <b>Date Stamp</b> 21 Feb 2020 09:25:57 |                                        | <b>File Name</b> C:\USERS\Лаб6а534\DOWNLOADS\FZ8495-1 (1).JDF | <b>Owner</b> CKP              |
| <b>Nucleus</b> 1H                      | <b>Number of Transients</b> 8          | <b>Origin</b> ECA 600                                         | <b>Solvent</b> CHLOROFORM-d   |
| <b>Points Count</b> 16384              | <b>Pulse Sequence</b> single_pulse.ex2 | <b>Original Points Count</b> 16384                            |                               |
| <b>Spectrum Offset (Hz)</b> 5413.0630  | <b>Sweep Width (Hz)</b> 16534.39       | <b>Receiver Gain</b> 38.00                                    |                               |
|                                        | <b>Temperature (degree C)</b> 23.200   |                                                               |                               |

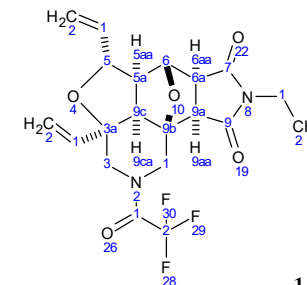

13a

FZ8495-1 PK2901.ESP

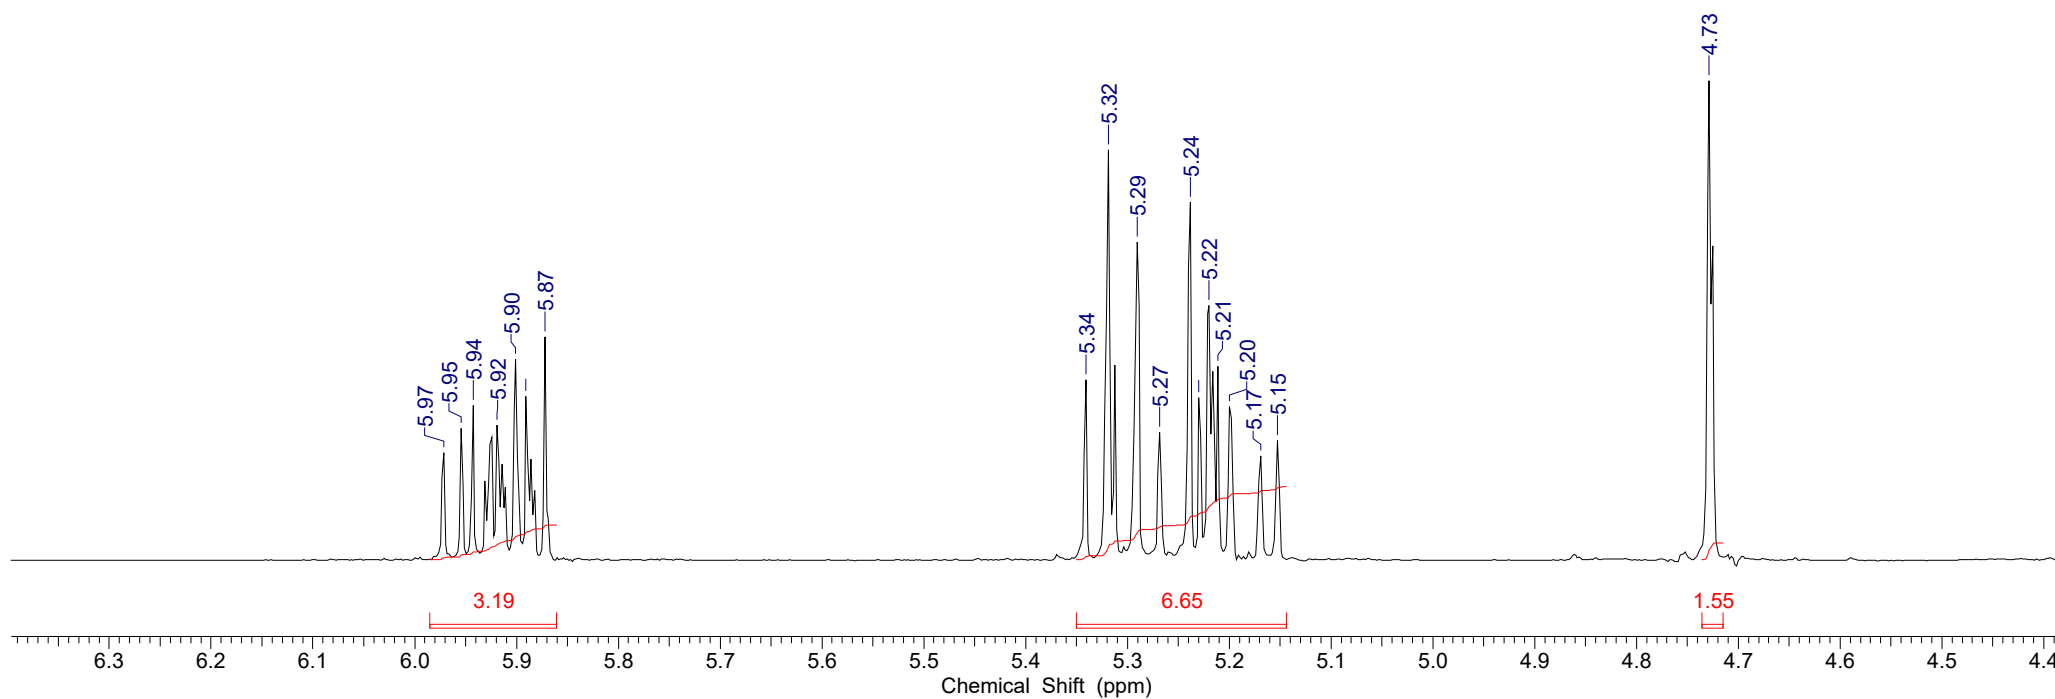

|                                                                                             |                    |
|---------------------------------------------------------------------------------------------|--------------------|
| <b>Formula</b> C <sub>20</sub> H <sub>21</sub> F <sub>3</sub> N <sub>3</sub> O <sub>5</sub> | <b>FW</b> 426.3863 |
|---------------------------------------------------------------------------------------------|--------------------|

|                                        |                                        |                                                              |                               |
|----------------------------------------|----------------------------------------|--------------------------------------------------------------|-------------------------------|
| <b>Acquisition Time (sec)</b> 0.9909   | <b>Comment</b> single_pulse            | <b>Date</b> 09 Feb 2020 07:40:15                             | <b>Frequency (MHz)</b> 600.17 |
| <b>Date Stamp</b> 21 Feb 2020 09:25:57 |                                        | <b>File Name</b> C:\USERS\Лa6a534\DOWNLOADS\FZ8495-1 (1).JDF | <b>Owner</b> CKP              |
| <b>Nucleus</b> 1H                      | <b>Number of Transients</b> 8          | <b>Origin</b> ECA 600                                        | <b>Solvent</b> CHLOROFORM-d   |
| <b>Points Count</b> 16384              | <b>Pulse Sequence</b> single_pulse.ex2 | <b>Original Points Count</b> 16384                           | <b>Receiver Gain</b> 38.00    |
| <b>Spectrum Offset (Hz)</b> 5413.0630  | <b>Sweep Width (Hz)</b> 16534.39       | <b>Temperature (degree C)</b> 23.200                         |                               |



FZ8495-1 PK2901.ESP

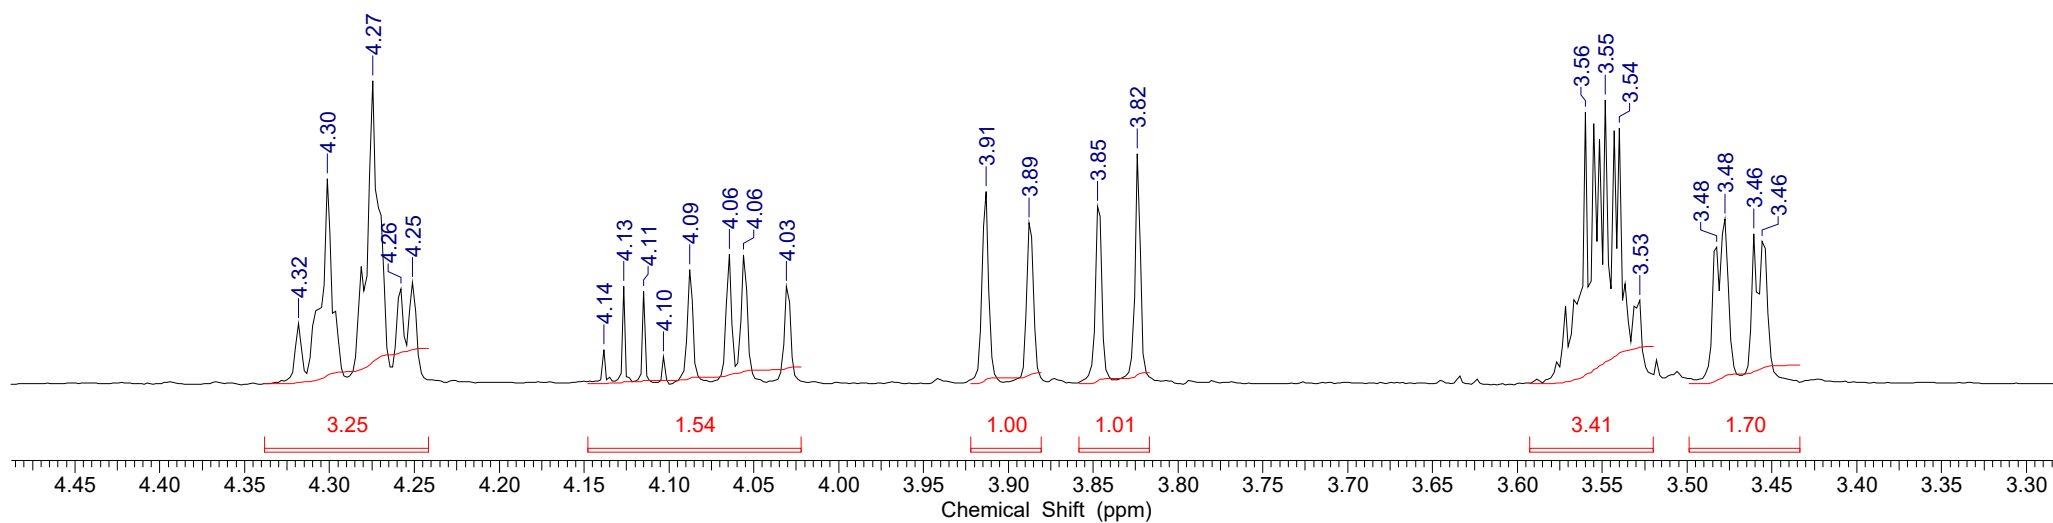

|                                                                                             |                    |
|---------------------------------------------------------------------------------------------|--------------------|
| <b>Formula</b> C <sub>20</sub> H <sub>21</sub> F <sub>3</sub> N <sub>3</sub> O <sub>5</sub> | <b>FW</b> 426.3863 |
|---------------------------------------------------------------------------------------------|--------------------|

|                                        |                                                               |                                      |                               |
|----------------------------------------|---------------------------------------------------------------|--------------------------------------|-------------------------------|
| <b>Acquisition Time (sec)</b> 0.9909   | <b>Comment</b> single_pulse                                   | <b>Date</b> 09 Feb 2020 07:40:15     | <b>Frequency (MHz)</b> 600.17 |
| <b>Date Stamp</b> 21 Feb 2020 09:25:57 | <b>File Name</b> C:\USERS\Лаб6a534\DOWNLOADS\FZ8495-1 (1).JDF | <b>Original Points Count</b> 16384   | <b>Owner</b> CKP              |
| <b>Nucleus</b> 1H                      | <b>Number of Transients</b> 8                                 | <b>Origin</b> ECA 600                | <b>Solvent</b> CHLOROFORM-d   |
| <b>Points Count</b> 16384              | <b>Pulse Sequence</b> single_pulse.ex2                        | <b>Receiver Gain</b> 38.00           |                               |
| <b>Spectrum Offset (Hz)</b> 5413.0630  | <b>Sweep Width (Hz)</b> 16534.39                              | <b>Temperature (degree C)</b> 23.200 |                               |



13a

FZ8495-1 PK2901.ESP

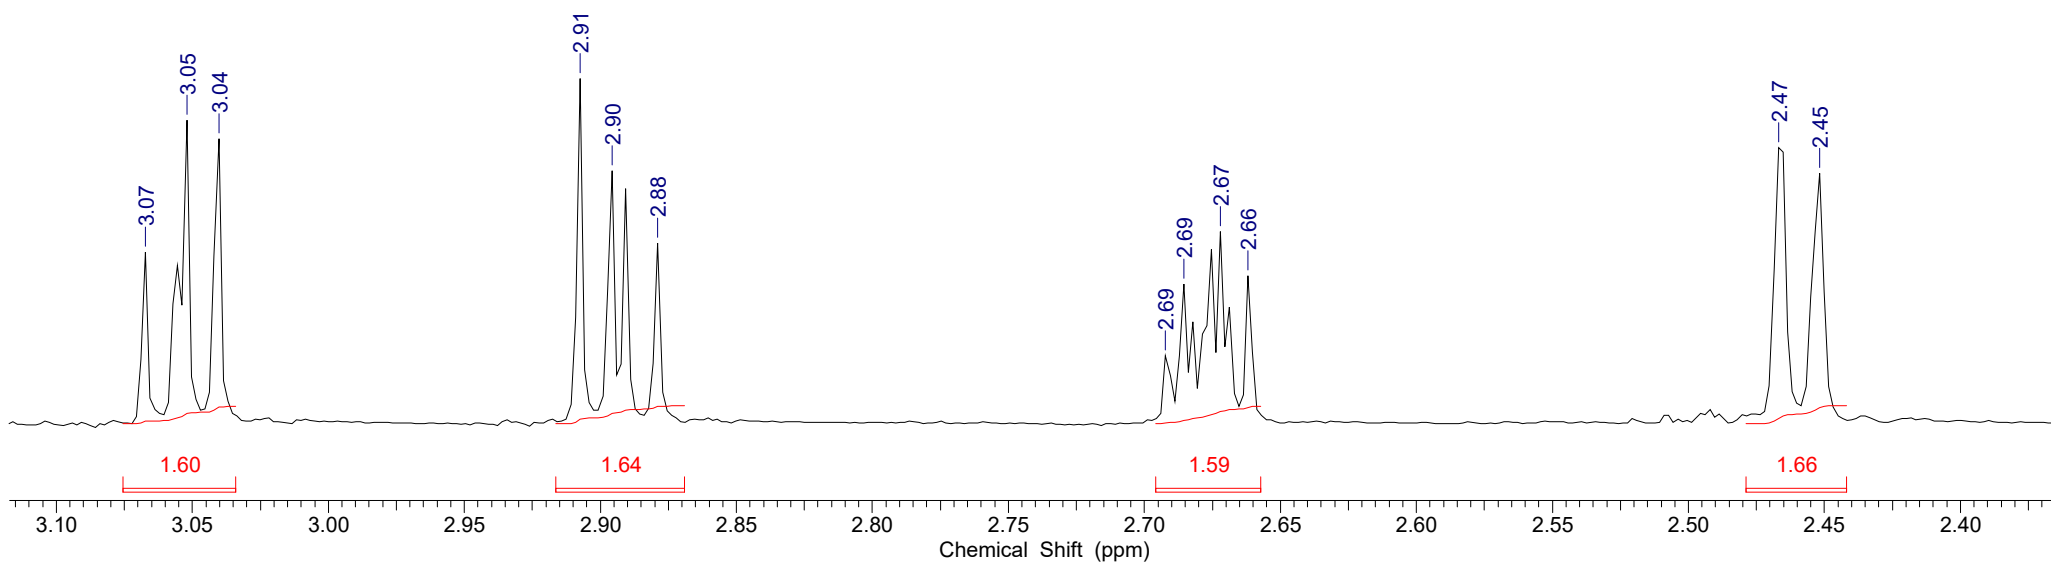



|                                                                                             |                    |
|---------------------------------------------------------------------------------------------|--------------------|
| <b>Formula</b> C <sub>20</sub> H <sub>21</sub> F <sub>3</sub> N <sub>3</sub> O <sub>5</sub> | <b>FW</b> 426.3863 |
|---------------------------------------------------------------------------------------------|--------------------|

|                                        |                                                              |                                      |                               |
|----------------------------------------|--------------------------------------------------------------|--------------------------------------|-------------------------------|
| <b>Acquisition Time (sec)</b> 0.9909   | <b>Comment</b> single_pulse                                  | <b>Date</b> 09 Feb 2020 07:40:15     | <b>Frequency (MHz)</b> 600.17 |
| <b>Date Stamp</b> 21 Feb 2020 09:25:57 | <b>File Name</b> C:\USERS\Лa6a534\DOWNLOADS\FZ8495-1 (1).JDF | <b>Original Points Count</b> 16384   | <b>Owner</b> CKP              |
| <b>Nucleus</b> 1H                      | <b>Number of Transients</b> 8                                | <b>Origin</b> ECA 600                | <b>Solvent</b> CHLOROFORM-d   |
| <b>Points Count</b> 16384              | <b>Pulse Sequence</b> single_pulse.ex2                       | <b>Receiver Gain</b> 38.00           |                               |
| <b>Spectrum Offset (Hz)</b> 5413.0630  | <b>Sweep Width (Hz)</b> 16534.39                             | <b>Temperature (degree C)</b> 23.200 |                               |



13a

FZ8495-1 PK2901.ESP

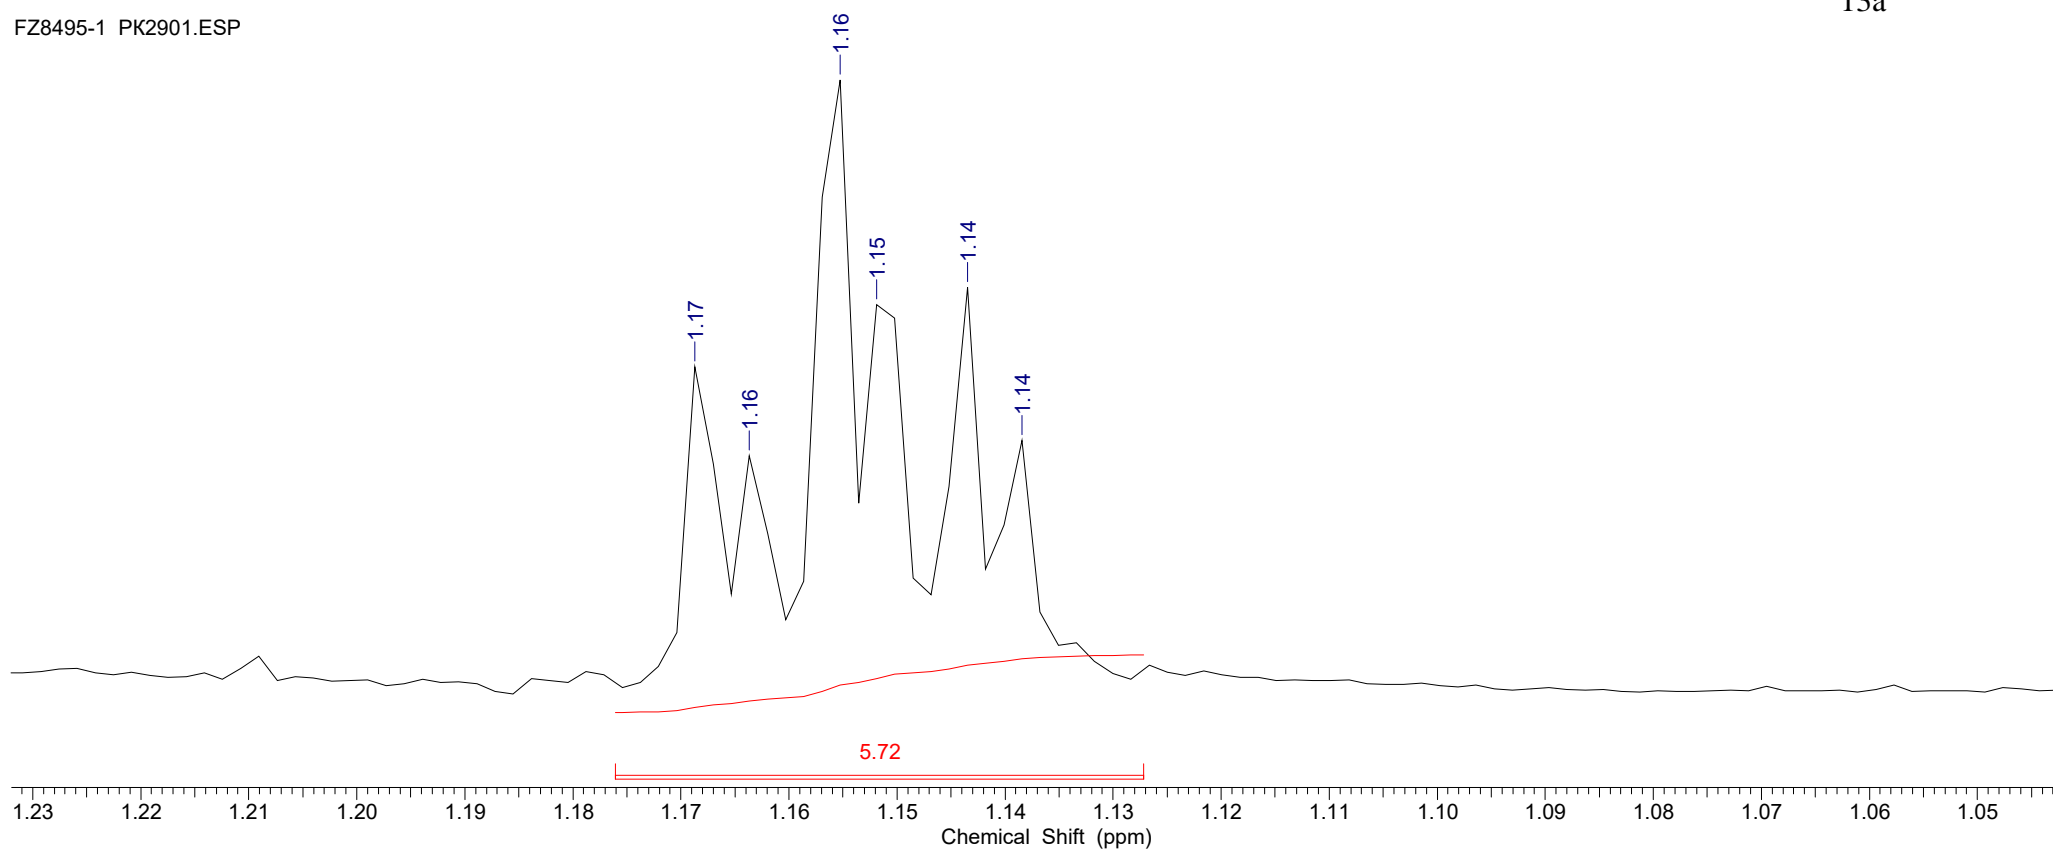

|                                                                                             |                    |
|---------------------------------------------------------------------------------------------|--------------------|
| <b>Formula</b> C <sub>20</sub> H <sub>21</sub> F <sub>3</sub> N <sub>2</sub> O <sub>5</sub> | <b>FW</b> 426.3863 |
|---------------------------------------------------------------------------------------------|--------------------|

|                                        |                                                               |                                        |
|----------------------------------------|---------------------------------------------------------------|----------------------------------------|
| <b>Acquisition Time (sec)</b> 0.6921   | <b>Comment</b> single pulse decoupled gated NOE               | <b>Date</b> 18 Mar 2020 11:04:50       |
| <b>Date Stamp</b> 18 Mar 2020 10:23:02 | <b>File Name</b> C:\USERS\Л1а6а534\DOWNLOADS\FZ8625-1 (3).JDF |                                        |
| <b>Frequency (MHz)</b> 150.91          | <b>Nucleus</b> 13C                                            | <b>Number of Transients</b> 800        |
| <b>Original Points Count</b> 32768     | <b>Owner</b> CKP                                              | <b>Points Count</b> 32768              |
| <b>Receiver Gain</b> 58.00             | <b>Solvent</b> CHLOROFORM-d                                   | <b>Pulse Sequence</b> single pulse dec |
| <b>Sweep Width (Hz)</b> 47348.49       | <b>Temperature (degree C)</b> 23.600                          | <b>Spectrum Offset (Hz)</b> 15080.7979 |

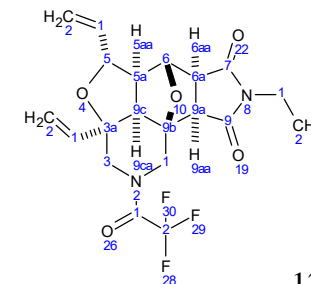

13a

FZ8625-1 (3).JDF

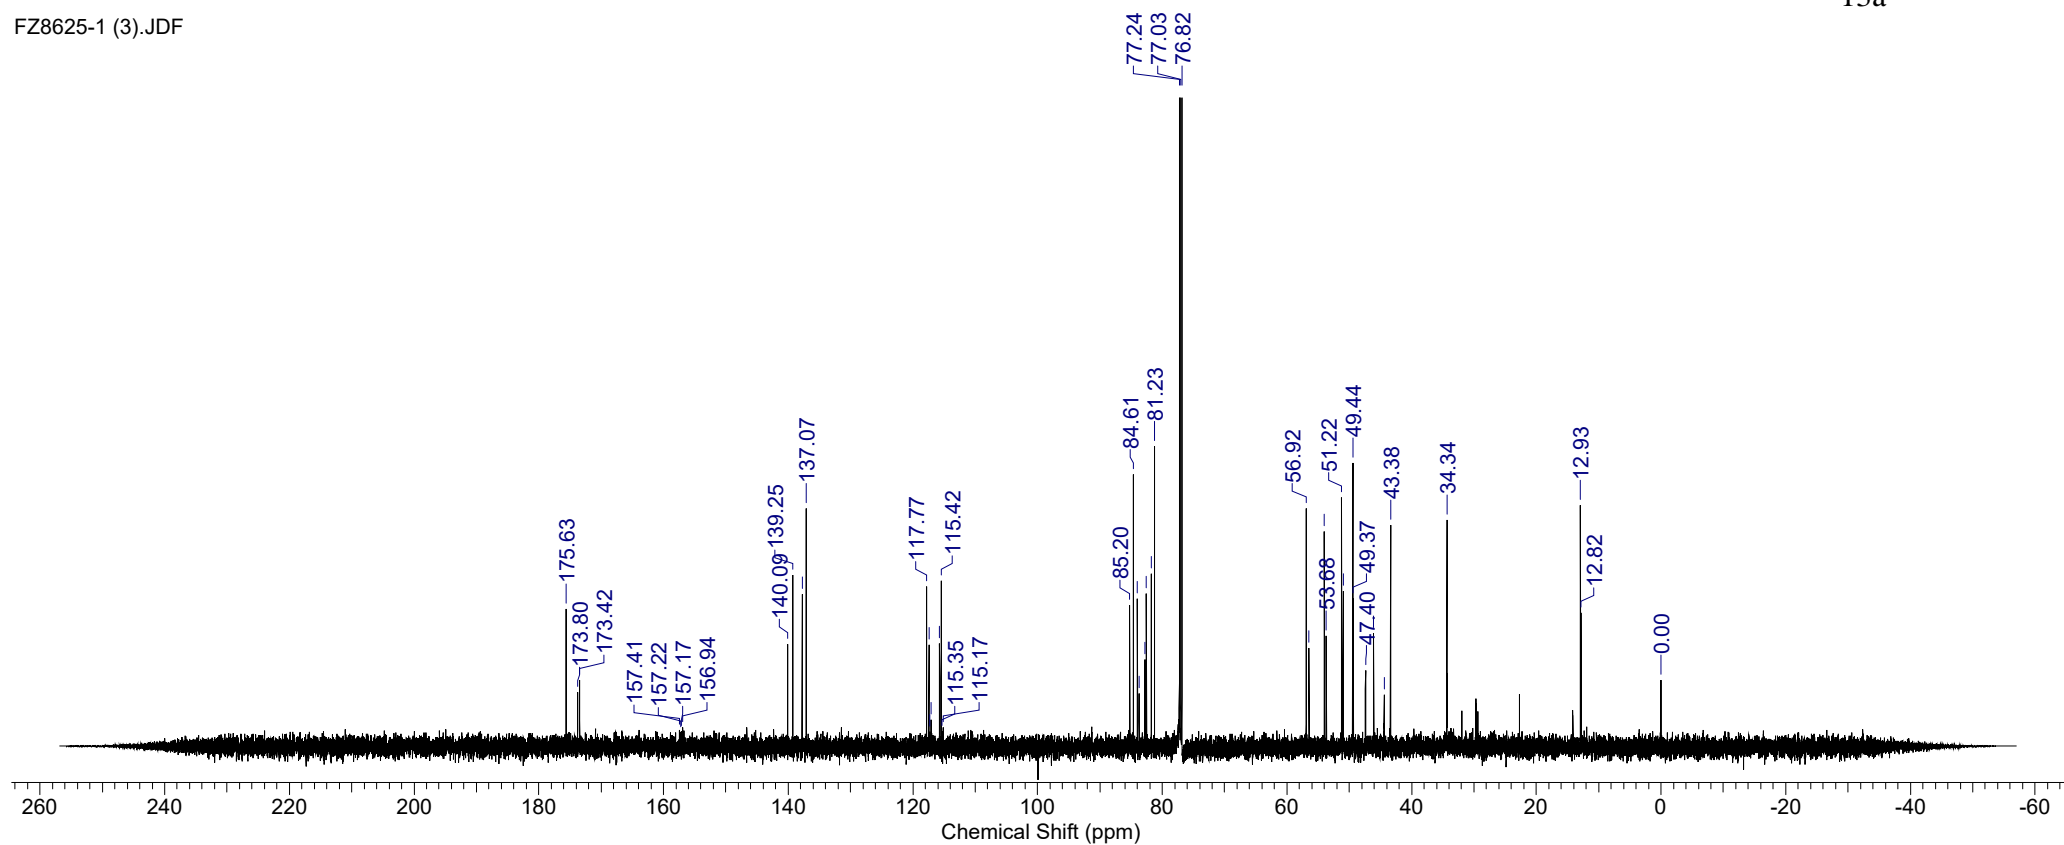

|                                                                                             |                    |
|---------------------------------------------------------------------------------------------|--------------------|
| <b>Formula</b> C <sub>20</sub> H <sub>21</sub> F <sub>3</sub> N <sub>3</sub> O <sub>5</sub> | <b>FW</b> 426.3863 |
|---------------------------------------------------------------------------------------------|--------------------|

|                                        |                                                              |                                        |
|----------------------------------------|--------------------------------------------------------------|----------------------------------------|
| <b>Acquisition Time (sec)</b> 0.6921   | <b>Comment</b> single pulse decoupled gated NOE              | <b>Date</b> 18 Mar 2020 11:04:50       |
| <b>Date Stamp</b> 18 Mar 2020 10:23:02 | <b>File Name</b> C:\USERS\Лабa534\DOWNLOADS\FZ8625-1 (3).JDF |                                        |
| <b>Frequency (MHz)</b> 150.91          | <b>Nucleus</b> 13C                                           | <b>Number of Transients</b> 800        |
| <b>Original Points Count</b> 32768     | <b>Owner</b> CKP                                             | <b>Points Count</b> 32768              |
| <b>Receiver Gain</b> 58.00             | <b>Solvent</b> CHLOROFORM-d                                  | <b>Pulse Sequence</b> single pulse dec |
| <b>Sweep Width (Hz)</b> 47348.49       | <b>Temperature (degree C)</b> 23.600                         | <b>Spectrum Offset (Hz)</b> 15080.7979 |



FZ8625-1 (3).JDF

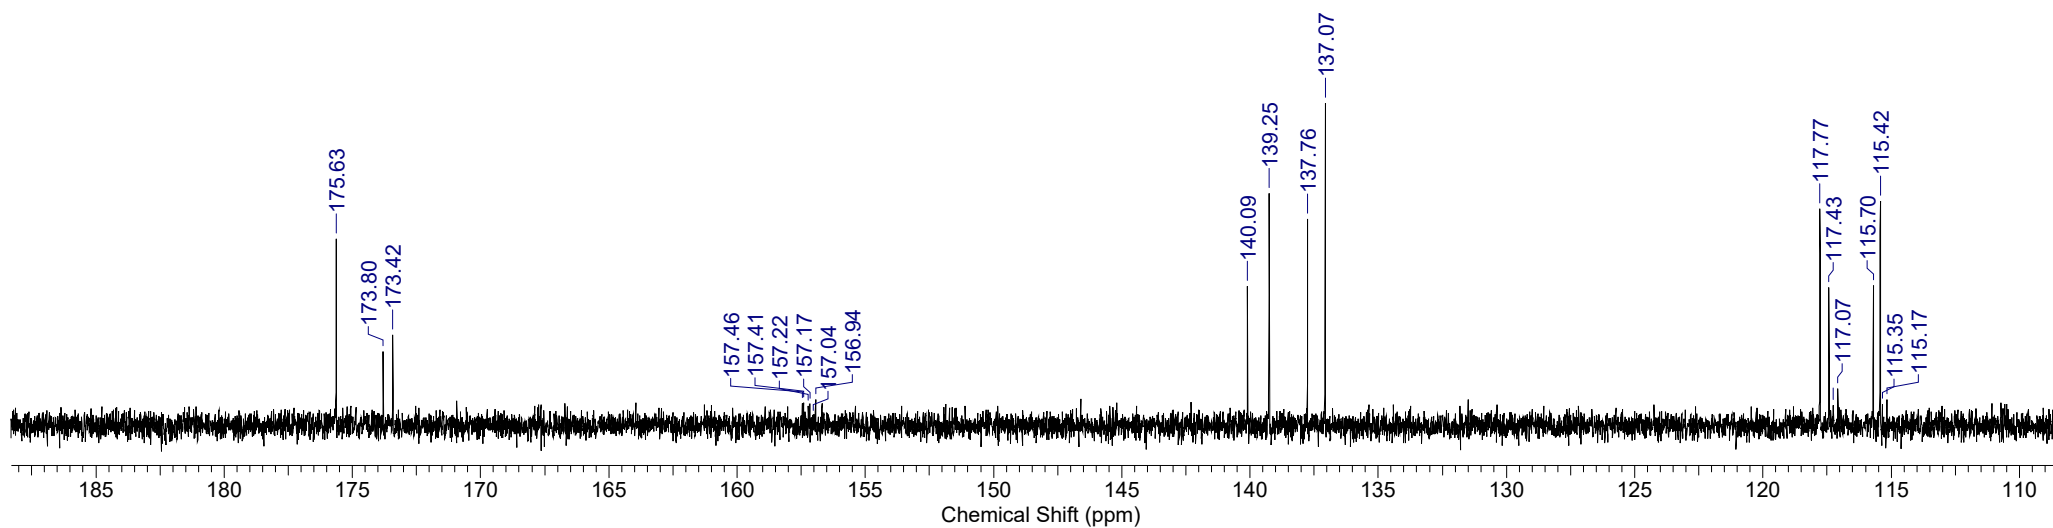

|                                                                                             |                    |
|---------------------------------------------------------------------------------------------|--------------------|
| <b>Formula</b> C <sub>20</sub> H <sub>21</sub> F <sub>3</sub> N <sub>2</sub> O <sub>5</sub> | <b>FW</b> 426.3863 |
|---------------------------------------------------------------------------------------------|--------------------|

|                                        |                                                               |                                        |
|----------------------------------------|---------------------------------------------------------------|----------------------------------------|
| <b>Acquisition Time (sec)</b> 0.6921   | <b>Comment</b> single pulse decoupled gated NOE               | <b>Date</b> 18 Mar 2020 11:04:50       |
| <b>Date Stamp</b> 18 Mar 2020 10:23:02 | <b>File Name</b> C:\USERS\Лаб6a534\DOWNLOADS\FZ8625-1 (3).JDF |                                        |
| <b>Frequency (MHz)</b> 150.91          | <b>Nucleus</b> 13C                                            | <b>Number of Transients</b> 800        |
| <b>Original Points Count</b> 32768     | <b>Owner</b> CKP                                              | <b>Points Count</b> 32768              |
| <b>Receiver Gain</b> 58.00             | <b>Solvent</b> CHLOROFORM-d                                   | <b>Pulse Sequence</b> single pulse dec |
| <b>Sweep Width (Hz)</b> 47348.49       | <b>Temperature (degree C)</b> 23.600                          | <b>Spectrum Offset (Hz)</b> 15080.7979 |

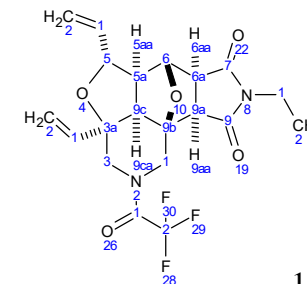

13a

FZ8625-1 (3).JDF

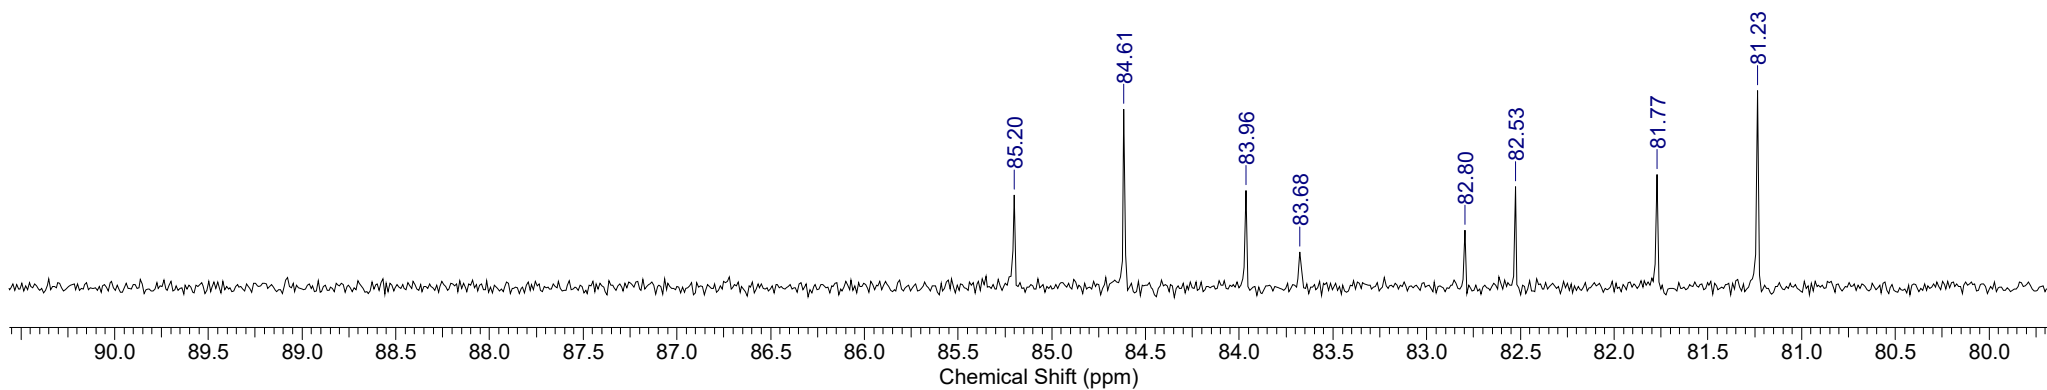

|                                                                                             |                    |
|---------------------------------------------------------------------------------------------|--------------------|
| <b>Formula</b> C <sub>20</sub> H <sub>21</sub> F <sub>3</sub> N <sub>3</sub> O <sub>5</sub> | <b>FW</b> 426.3863 |
|---------------------------------------------------------------------------------------------|--------------------|

|                                        |                                                               |                                        |
|----------------------------------------|---------------------------------------------------------------|----------------------------------------|
| <b>Acquisition Time (sec)</b> 0.6921   | <b>Comment</b> single pulse decoupled gated NOE               | <b>Date</b> 18 Mar 2020 11:04:50       |
| <b>Date Stamp</b> 18 Mar 2020 10:23:02 | <b>File Name</b> C:\USERS\Л1а6а534\DOWNLOADS\FZ8625-1 (3).JDF |                                        |
| <b>Frequency (MHz)</b> 150.91          | <b>Nucleus</b> 13C                                            | <b>Origin</b> ECA 600                  |
| <b>Original Points Count</b> 32768     | <b>Owner</b> CKP                                              | <b>Points Count</b> 32768              |
| <b>Receiver Gain</b> 58.00             | <b>Solvent</b> CHLOROFORM-d                                   | <b>Pulse Sequence</b> single pulse dec |
| <b>Sweep Width (Hz)</b> 47348.49       | <b>Temperature (degree C)</b> 23.600                          | <b>Spectrum Offset (Hz)</b> 15080.7979 |



13a

FZ8625-1 (3).JDF

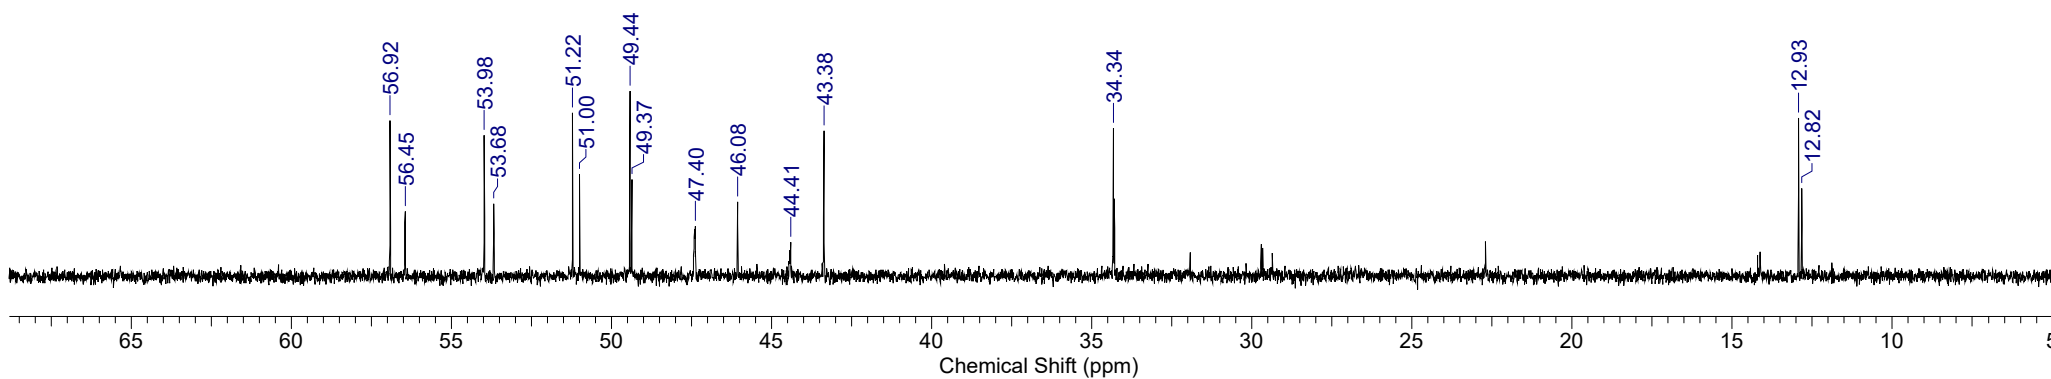

|                                                                                             |                    |
|---------------------------------------------------------------------------------------------|--------------------|
| <b>Formula</b> C <sub>20</sub> H <sub>21</sub> F <sub>3</sub> N <sub>3</sub> O <sub>5</sub> | <b>FW</b> 426.3863 |
|---------------------------------------------------------------------------------------------|--------------------|

|                                        |                                                          |                                         |                                      |
|----------------------------------------|----------------------------------------------------------|-----------------------------------------|--------------------------------------|
| <b>Acquisition Time (sec)</b> 0.4614   | <b>Comment</b> single_pulse                              | <b>Date</b> 26 Mar 2020 08:37:51        | <b>Frequency (MHz)</b> 564.73        |
| <b>Date Stamp</b> 26 Mar 2020 07:55:29 | <b>File Name</b> C:\USERS\la6a534\DOWNLOADS\FZ8671-1.JDF | <b>Original Points Count</b> 65536      | <b>Owner</b> CKP                     |
| <b>Nucleus</b> 19F                     | <b>Number of Transients</b> 8                            | <b>Receiver Gain</b> 44.00              |                                      |
| <b>Points Count</b> 65536              | <b>Pulse Sequence</b> single_pulse.ex2                   | <b>Spectrum Offset (Hz)</b> -56472.6094 | <b>Temperature (degree C)</b> 22.500 |
| <b>Solvent</b> CHLOROFORM-d            |                                                          | <b>Sweep Width (Hz)</b> 142045.45       |                                      |

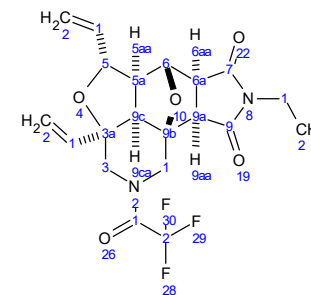

13a

FZ8671-1.JDF

-68.02

-68.99

1.70  
II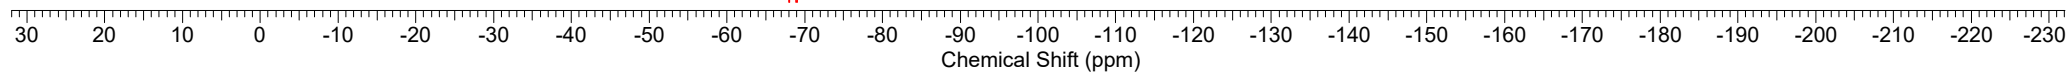

|                                                                                             |                    |
|---------------------------------------------------------------------------------------------|--------------------|
| <b>Formula</b> C <sub>20</sub> H <sub>21</sub> F <sub>3</sub> N <sub>3</sub> O <sub>5</sub> | <b>FW</b> 426.3863 |
|---------------------------------------------------------------------------------------------|--------------------|

|                                        |                                                          |                                         |                                      |
|----------------------------------------|----------------------------------------------------------|-----------------------------------------|--------------------------------------|
| <b>Acquisition Time (sec)</b> 0.4614   | <b>Comment</b> single_pulse                              | <b>Date</b> 26 Mar 2020 08:37:51        | <b>Frequency (MHz)</b> 564.73        |
| <b>Date Stamp</b> 26 Mar 2020 07:55:29 | <b>File Name</b> C:\USERS\la6a534\DOWNLOADS\FZ8671-1.JDF | <b>Original Points Count</b> 65536      | <b>Owner</b> CKP                     |
| <b>Nucleus</b> 19F                     | <b>Number of Transients</b> 8                            | <b>Origin</b> ECA 600                   | <b>Receiver Gain</b> 44.00           |
| <b>Points Count</b> 65536              | <b>Pulse Sequence</b> single_pulse.ex2                   | <b>Spectrum Offset (Hz)</b> -56472.6094 | <b>Sweep Width (Hz)</b> 142045.45    |
| <b>Solvent</b> CHLOROFORM-d            |                                                          |                                         | <b>Temperature (degree C)</b> 22.500 |

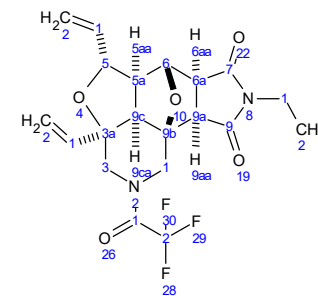

13a

FZ8671-1.JDF

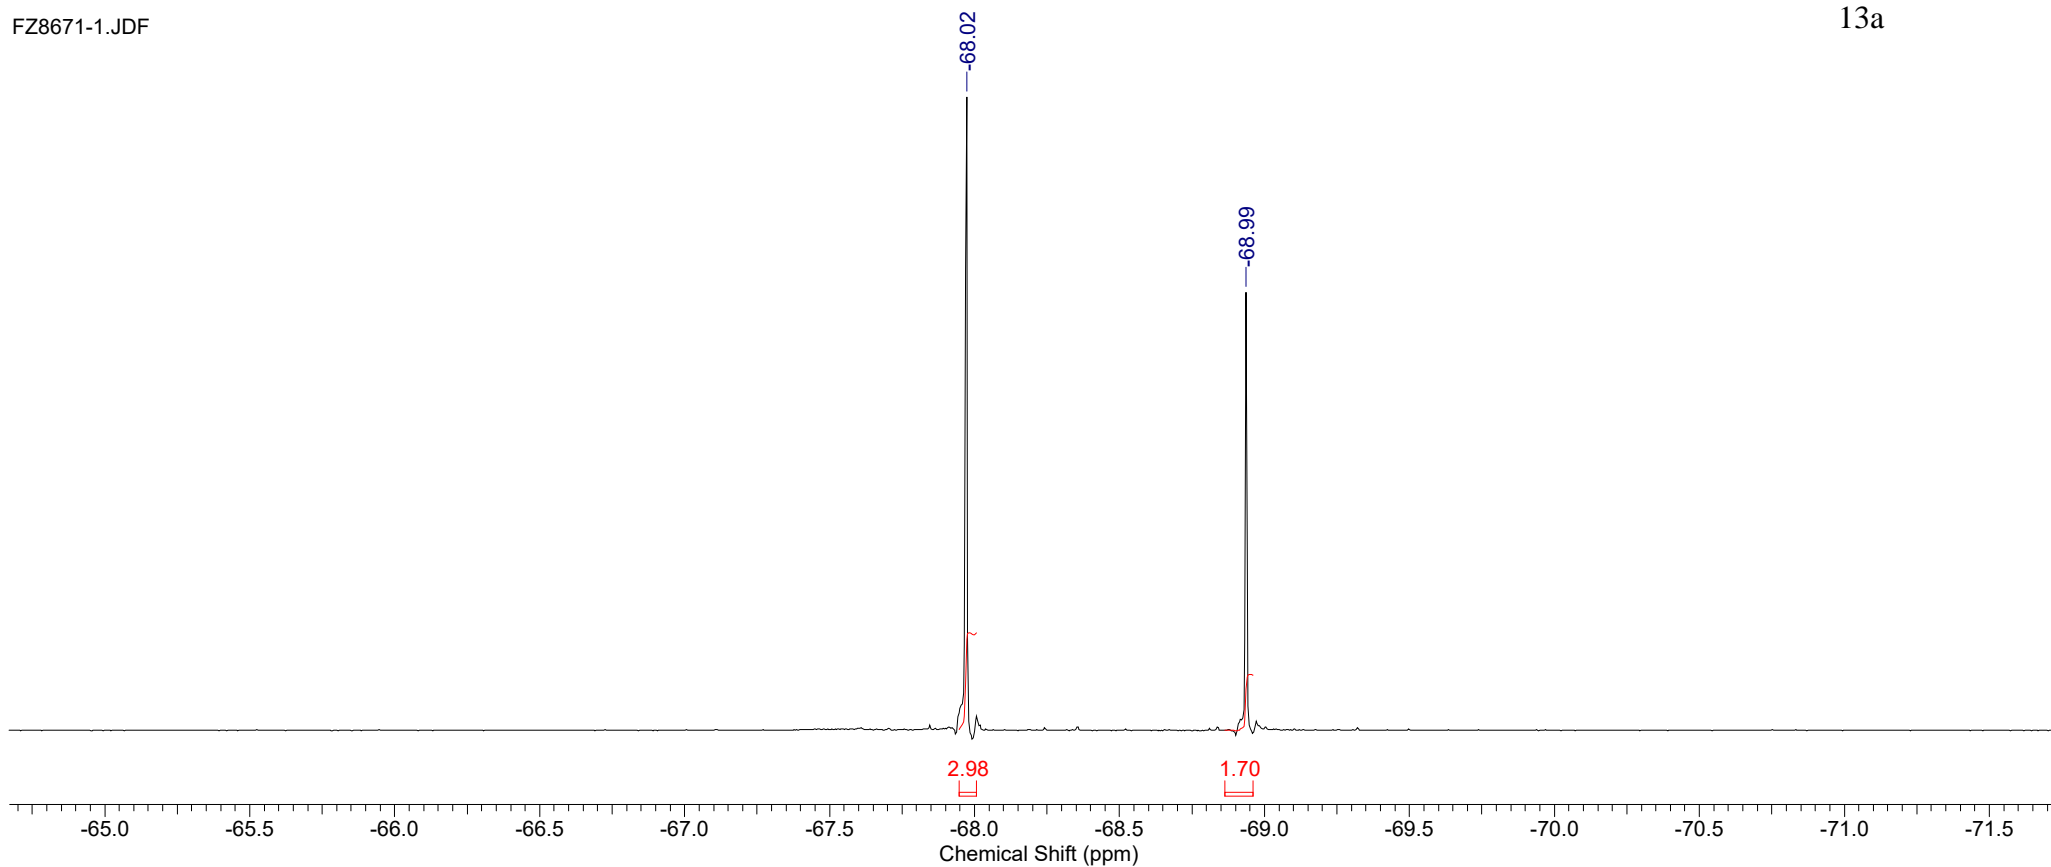

|                                                                |                    |
|----------------------------------------------------------------|--------------------|
| <b>Formula</b> C <sub>18</sub> H <sub>21</sub> NO <sub>5</sub> | <b>FW</b> 331.3630 |
|----------------------------------------------------------------|--------------------|

|                                        |                                                              |                                      |                               |
|----------------------------------------|--------------------------------------------------------------|--------------------------------------|-------------------------------|
| <b>Acquisition Time (sec)</b> 1.9818   | <b>Comment</b> single_pulse                                  | <b>Date</b> 03 Feb 2020 12:14:42     | <b>Frequency (MHz)</b> 600.17 |
| <b>Date Stamp</b> 03 Feb 2020 11:36:20 | <b>File Name</b> C:\USERS\la6a534\DOWNLOADS\FZ8396-1 (1).JDF | <b>Original Points Count</b> 32768   | <b>Owner</b> Mass             |
| <b>Nucleus</b> 1H                      | <b>Number of Transients</b> 8                                | <b>Origin</b> ECA 600                | <b>Solvent</b> CHLOROFORM-d   |
| <b>Points Count</b> 32768              | <b>Pulse Sequence</b> single_pulse.ex2                       | <b>Receiver Gain</b> 56.00           |                               |
| <b>Spectrum Offset (Hz)</b> 5409.6182  | <b>Sweep Width (Hz)</b> 16534.39                             | <b>Temperature (degree C)</b> 24.400 |                               |

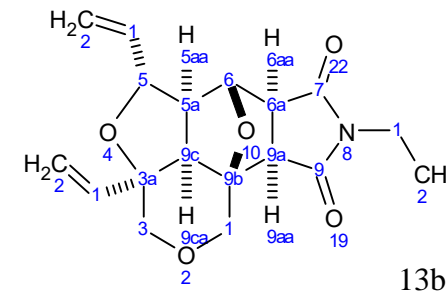

FZ8396-1 (1).JDF

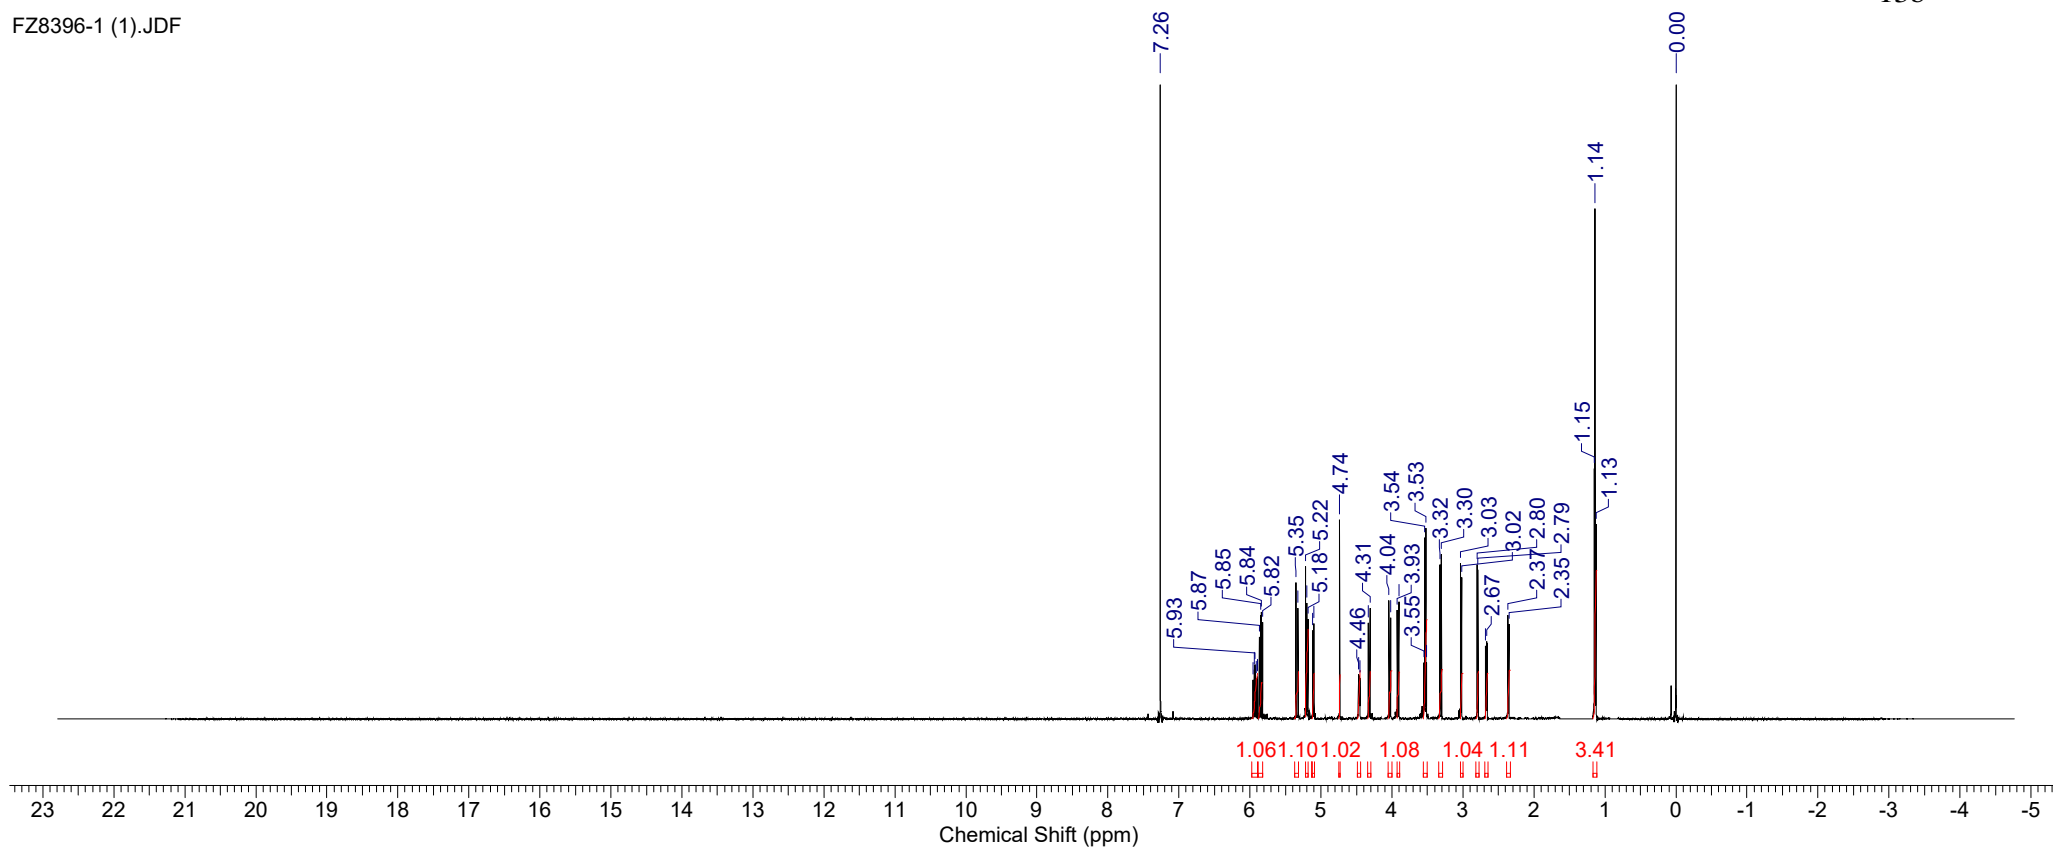



|                                                                |                    |
|----------------------------------------------------------------|--------------------|
| <b>Formula</b> C <sub>18</sub> H <sub>21</sub> NO <sub>5</sub> | <b>FW</b> 331.3630 |
|----------------------------------------------------------------|--------------------|

|                                        |                                        |                                                              |                               |
|----------------------------------------|----------------------------------------|--------------------------------------------------------------|-------------------------------|
| <b>Acquisition Time (sec)</b> 1.9818   | <b>Comment</b> single_pulse            | <b>Date</b> 03 Feb 2020 12:14:42                             | <b>Frequency (MHz)</b> 600.17 |
| <b>Date Stamp</b> 03 Feb 2020 11:36:20 |                                        | <b>File Name</b> C:\USERS\la6a534\DOWNLOADS\FZ8396-1 (1).JDF | <b>Owner</b> Mass             |
| <b>Nucleus</b> 1H                      | <b>Number of Transients</b> 8          | <b>Origin</b> ECA 600                                        | <b>Solvent</b> CHLOROFORM-d   |
| <b>Points Count</b> 32768              | <b>Pulse Sequence</b> single_pulse.ex2 | <b>Original Points Count</b> 32768                           |                               |
|                                        |                                        | <b>Receiver Gain</b> 56.00                                   |                               |
| <b>Spectrum Offset (Hz)</b> 5409.6182  | <b>Sweep Width (Hz)</b> 16534.39       | <b>Temperature (degree C)</b> 24.400                         |                               |

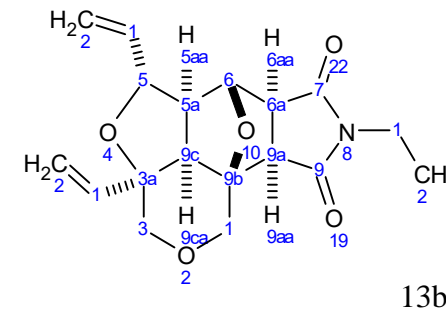

FZ8396-1 (1).JDF

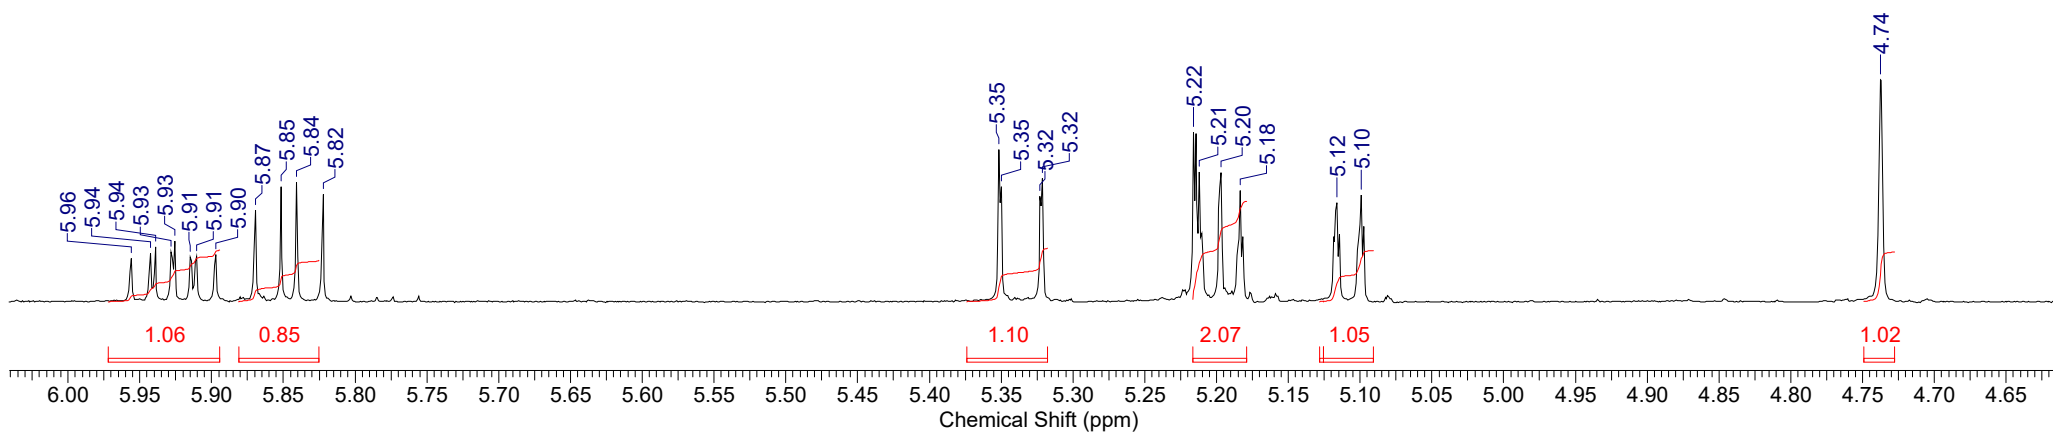

|                                                                |                    |
|----------------------------------------------------------------|--------------------|
| <b>Formula</b> C <sub>18</sub> H <sub>21</sub> NO <sub>5</sub> | <b>FW</b> 331.3630 |
|----------------------------------------------------------------|--------------------|

|                                        |                                                              |                                      |                               |
|----------------------------------------|--------------------------------------------------------------|--------------------------------------|-------------------------------|
| <b>Acquisition Time (sec)</b> 1.9818   | <b>Comment</b> single_pulse                                  | <b>Date</b> 03 Feb 2020 12:14:42     | <b>Frequency (MHz)</b> 600.17 |
| <b>Date Stamp</b> 03 Feb 2020 11:36:20 | <b>File Name</b> C:\USERS\la6a534\DOWNLOADS\FZ8396-1 (1).JDF | <b>Original Points Count</b> 32768   | <b>Owner</b> Mass             |
| <b>Nucleus</b> 1H                      | <b>Number of Transients</b> 8                                | <b>Origin</b> ECA 600                | <b>Solvent</b> CHLOROFORM-d   |
| <b>Points Count</b> 32768              | <b>Pulse Sequence</b> single_pulse.ex2                       | <b>Receiver Gain</b> 56.00           |                               |
| <b>Spectrum Offset (Hz)</b> 5409.6182  | <b>Sweep Width (Hz)</b> 16534.39                             | <b>Temperature (degree C)</b> 24.400 |                               |

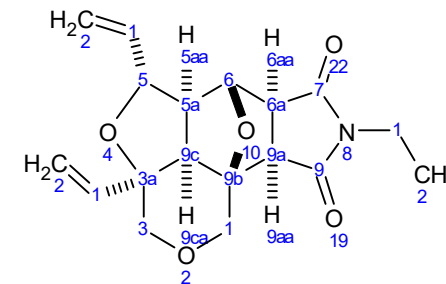

13b

FZ8396-1 (1).JDF

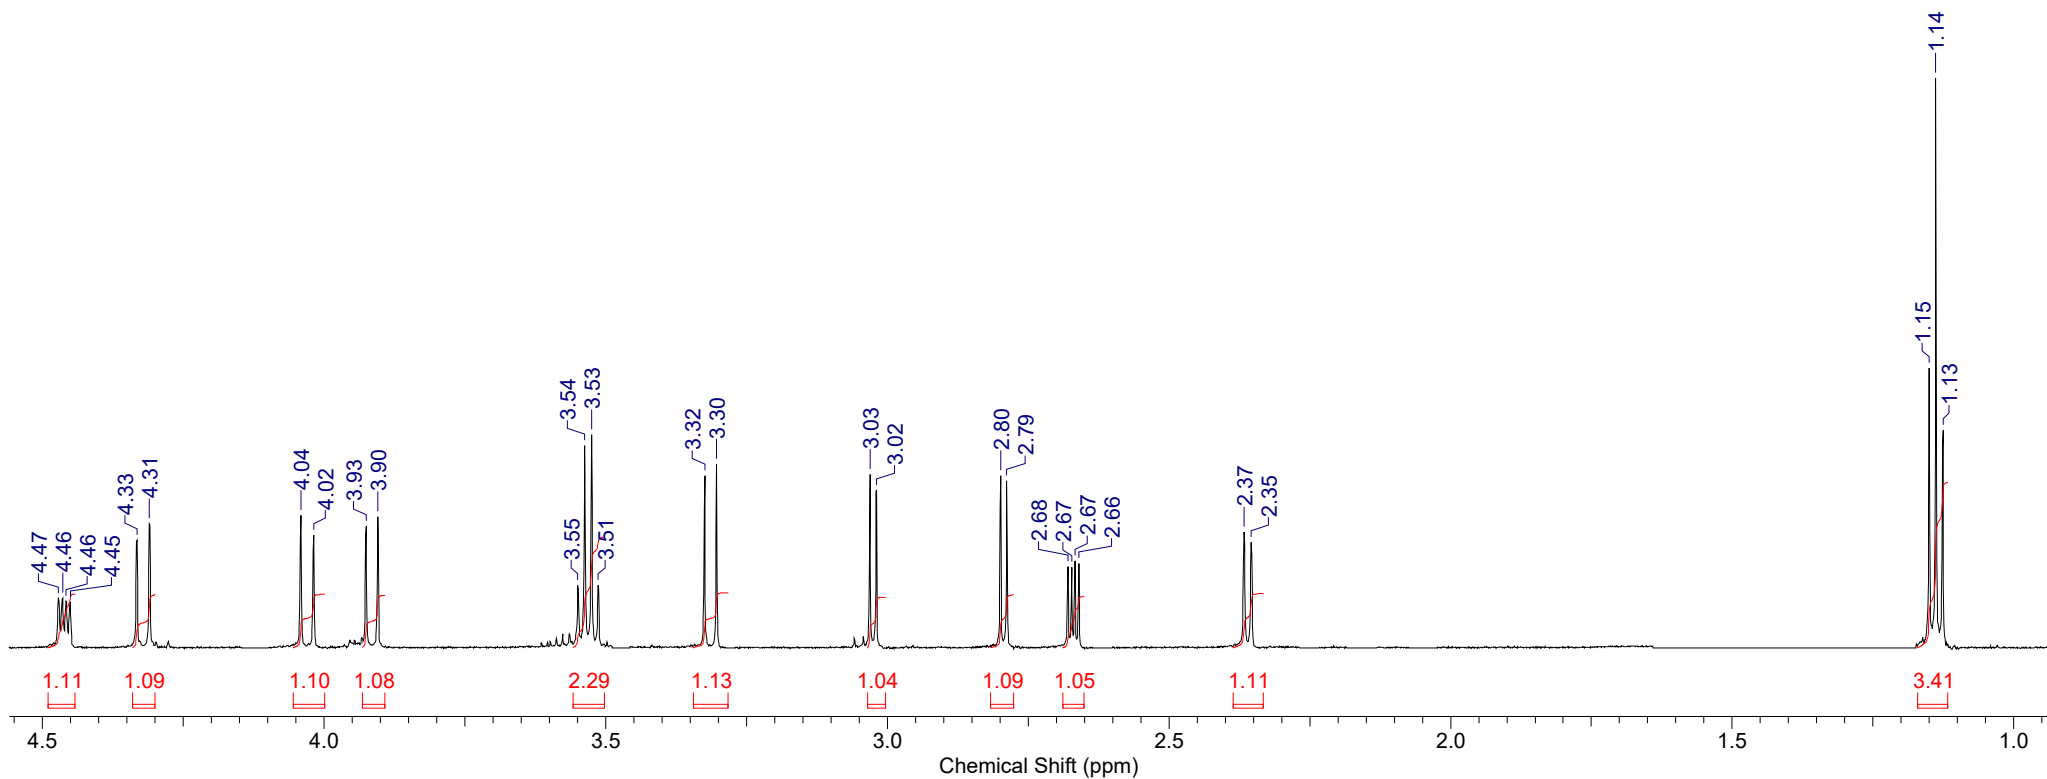

|                                                                |                    |
|----------------------------------------------------------------|--------------------|
| <b>Formula</b> C <sub>18</sub> H <sub>21</sub> NO <sub>5</sub> | <b>FW</b> 331.3630 |
|----------------------------------------------------------------|--------------------|

|                                        |                                                          |                                        |
|----------------------------------------|----------------------------------------------------------|----------------------------------------|
| <b>Acquisition Time (sec)</b> 0.6921   | <b>Comment</b> single pulse decoupled gated NOE          | <b>Date</b> 12 Feb 2020 03:36:55       |
| <b>Date Stamp</b> 12 Feb 2020 02:58:43 | <b>File Name</b> C:\USERS\Лa6a534\DOWNLOADS\FZ8428-1.JDF |                                        |
| <b>Frequency (MHz)</b> 150.91          | <b>Nucleus</b> 13C                                       | <b>Number of Transients</b> 1000       |
| <b>Original Points Count</b> 32768     | <b>Owner</b> Mass                                        | <b>Points Count</b> 32768              |
| <b>Receiver Gain</b> 54.00             | <b>Solvent</b> CHLOROFORM-d                              | <b>Pulse Sequence</b> single pulse dec |
| <b>Sweep Width (Hz)</b> 47348.49       | <b>Temperature (degree C)</b> 24.100                     | <b>Spectrum Offset (Hz)</b> 15091.3428 |

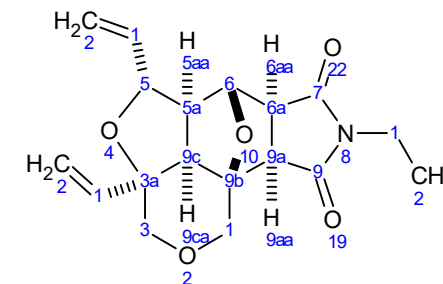

13b

FZ8428-1.ESP

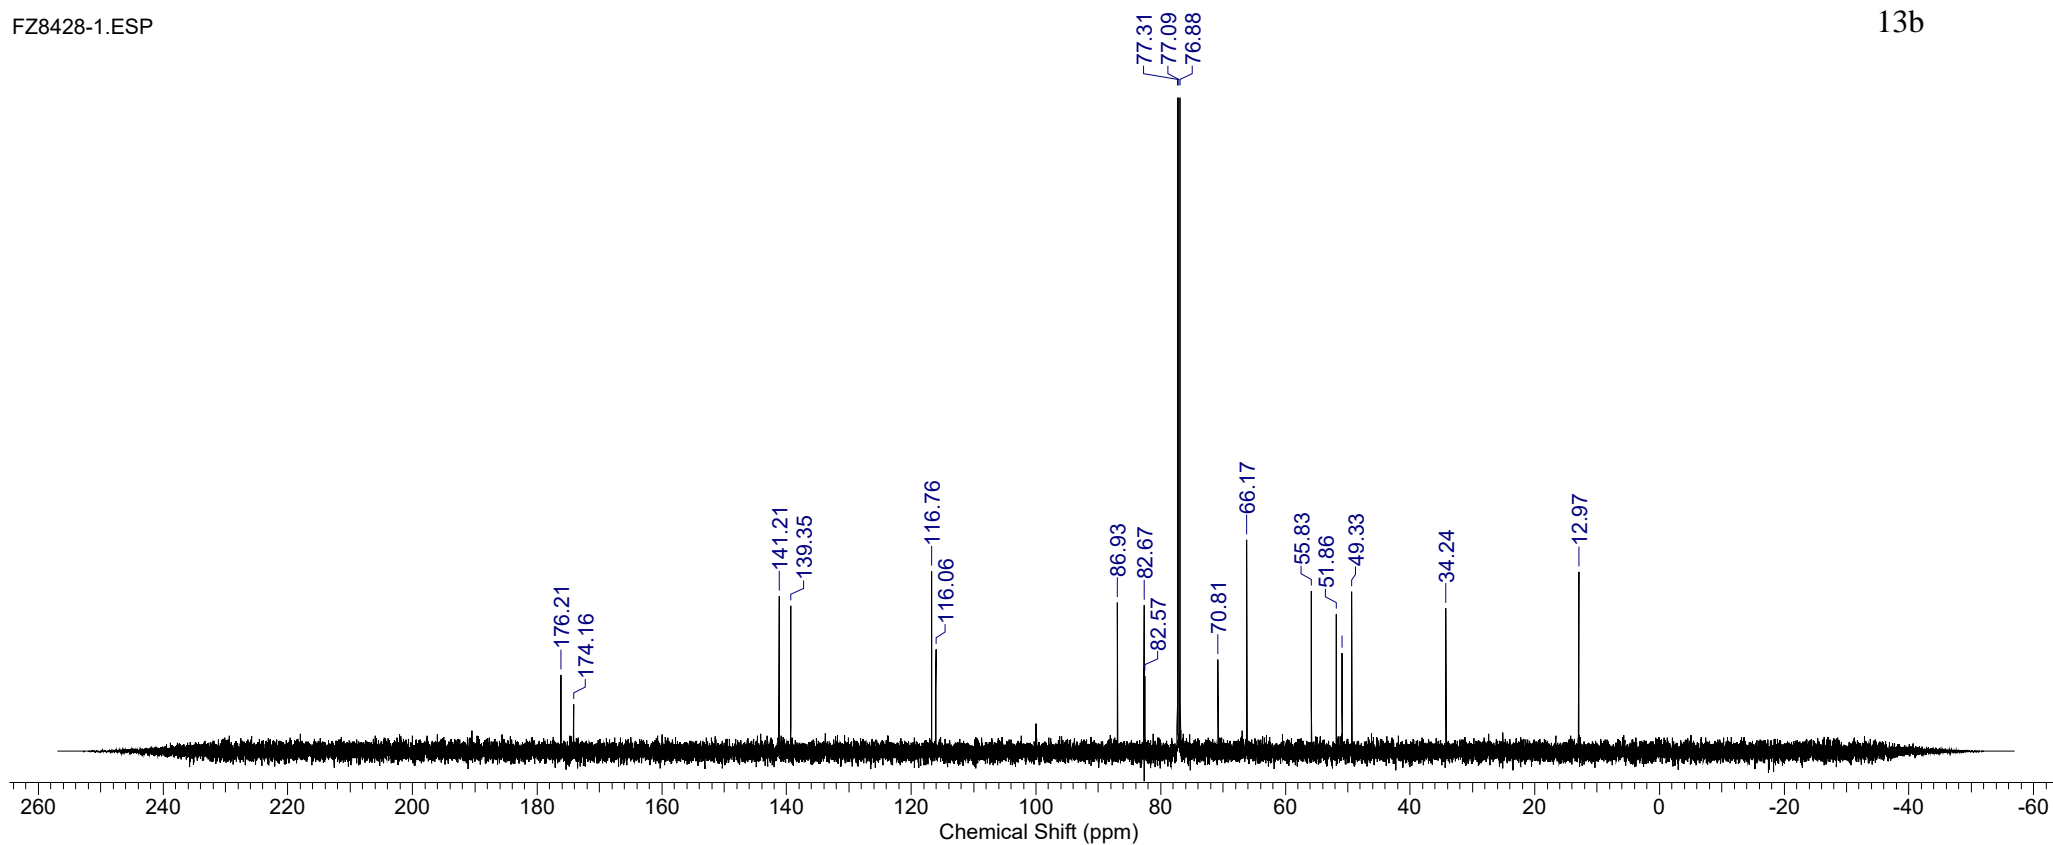

|                                                                |                    |
|----------------------------------------------------------------|--------------------|
| <b>Formula</b> C <sub>18</sub> H <sub>21</sub> NO <sub>5</sub> | <b>FW</b> 331.3630 |
|----------------------------------------------------------------|--------------------|

|                                        |                                                          |                                        |
|----------------------------------------|----------------------------------------------------------|----------------------------------------|
| <b>Acquisition Time (sec)</b> 0.6921   | <b>Comment</b> single pulse decoupled gated NOE          | <b>Date</b> 12 Feb 2020 03:36:55       |
| <b>Date Stamp</b> 12 Feb 2020 02:58:43 | <b>File Name</b> C:\USERS\Лабa534\DOWNLOADS\FZ8428-1.JDF |                                        |
| <b>Frequency (MHz)</b> 150.91          | <b>Nucleus</b> 13C                                       | <b>Number of Transients</b> 1000       |
| <b>Original Points Count</b> 32768     | <b>Owner</b> Mass                                        | <b>Points Count</b> 32768              |
| <b>Receiver Gain</b> 54.00             | <b>Solvent</b> CHLOROFORM-d                              | <b>Pulse Sequence</b> single pulse dec |
| <b>Sweep Width (Hz)</b> 47348.49       | <b>Temperature (degree C)</b> 24.100                     | <b>Spectrum Offset (Hz)</b> 15091.3428 |

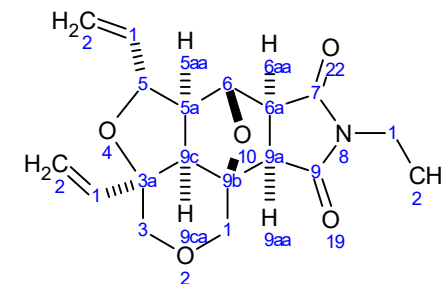

13b

FZ8428-1.JDF

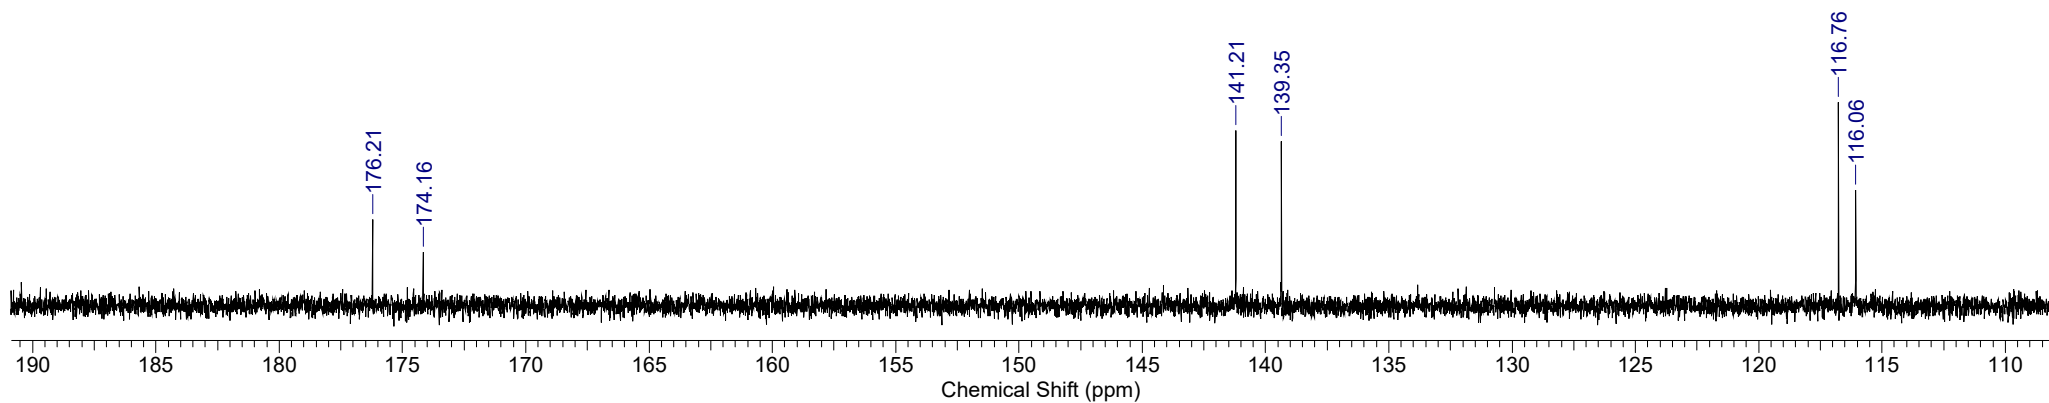

|                                                                  |                    |
|------------------------------------------------------------------|--------------------|
| <b>Formula</b> C <sub>18</sub> H <sub>21</sub> NO <sub>4</sub> S | <b>FW</b> 347.4286 |
|------------------------------------------------------------------|--------------------|

|                                        |                                                          |                                        |
|----------------------------------------|----------------------------------------------------------|----------------------------------------|
| <b>Acquisition Time (sec)</b> 0.6921   | <b>Comment</b> single pulse decoupled gated NOE          | <b>Date</b> 16 Jul 2020 11:01:22       |
| <b>Date Stamp</b> 16 Jul 2020 11:03:09 | <b>File Name</b> C:\USERS\Лабa534\DOWNLOADS\FZ8785-2.JDF |                                        |
| <b>Frequency (MHz)</b> 150.91          | <b>Nucleus</b> 13C                                       | <b>Number of Transients</b> 4000       |
| <b>Original Points Count</b> 32768     | <b>Owner</b> CKP                                         | <b>Points Count</b> 32768              |
| <b>Receiver Gain</b> 56.00             | <b>Solvent</b> CHLOROFORM-d                              | <b>Pulse Sequence</b> single pulse dec |
| <b>Sweep Width (Hz)</b> 47348.49       |                                                          | <b>Spectrum Offset (Hz)</b> 15079.3525 |

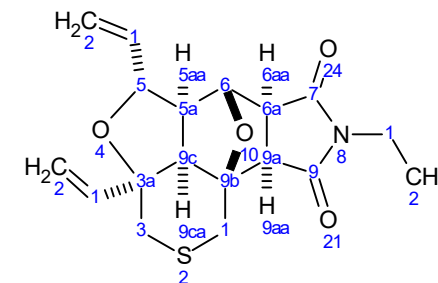

13c

FZ8785-2.JDF

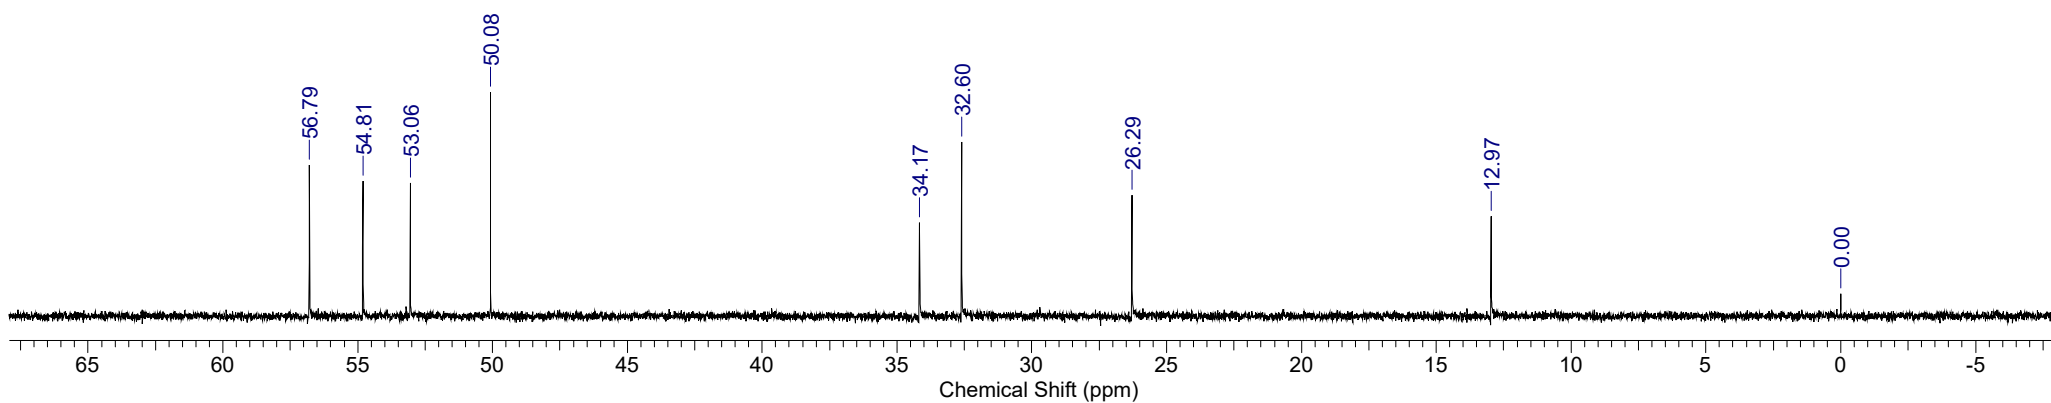

|                                                                  |                    |
|------------------------------------------------------------------|--------------------|
| <b>Formula</b> C <sub>18</sub> H <sub>21</sub> NO <sub>4</sub> S | <b>FW</b> 347.4286 |
|------------------------------------------------------------------|--------------------|

|                                                           |                                    |                                       |                                        |
|-----------------------------------------------------------|------------------------------------|---------------------------------------|----------------------------------------|
| <b>Acquisition Time (sec)</b> 1.9818                      | <b>Comment</b> single_pulse        | <b>Date</b> 15 Jul 2020 09:30:10      | <b>Date Stamp</b> 15 Jul 2020 09:31:55 |
| <b>File Name</b> C:\USERS\Лаб6а534\DOWNLOADS\FZ8785-1.JDF | <b>Frequency (MHz)</b> 600.17      | <b>Nucleus</b> 1H                     | <b>Number of Transients</b> 8          |
| <b>Origin</b> ECA 600                                     | <b>Original Points Count</b> 32768 | <b>Owner</b> CKP                      | <b>Pulse Sequence</b> single_pulse.ex2 |
| <b>Receiver Gain</b> 48.00                                | <b>Solvent</b> CHLOROFORM-d        | <b>Spectrum Offset (Hz)</b> 5411.6367 | <b>Sweep Width (Hz)</b> 16534.39       |

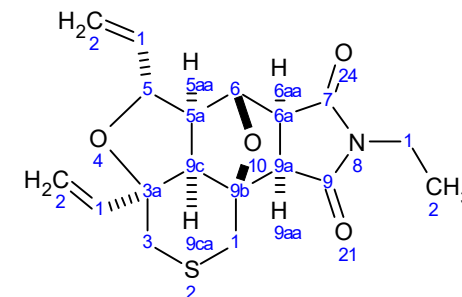

FZ8785-1.JDF

13c

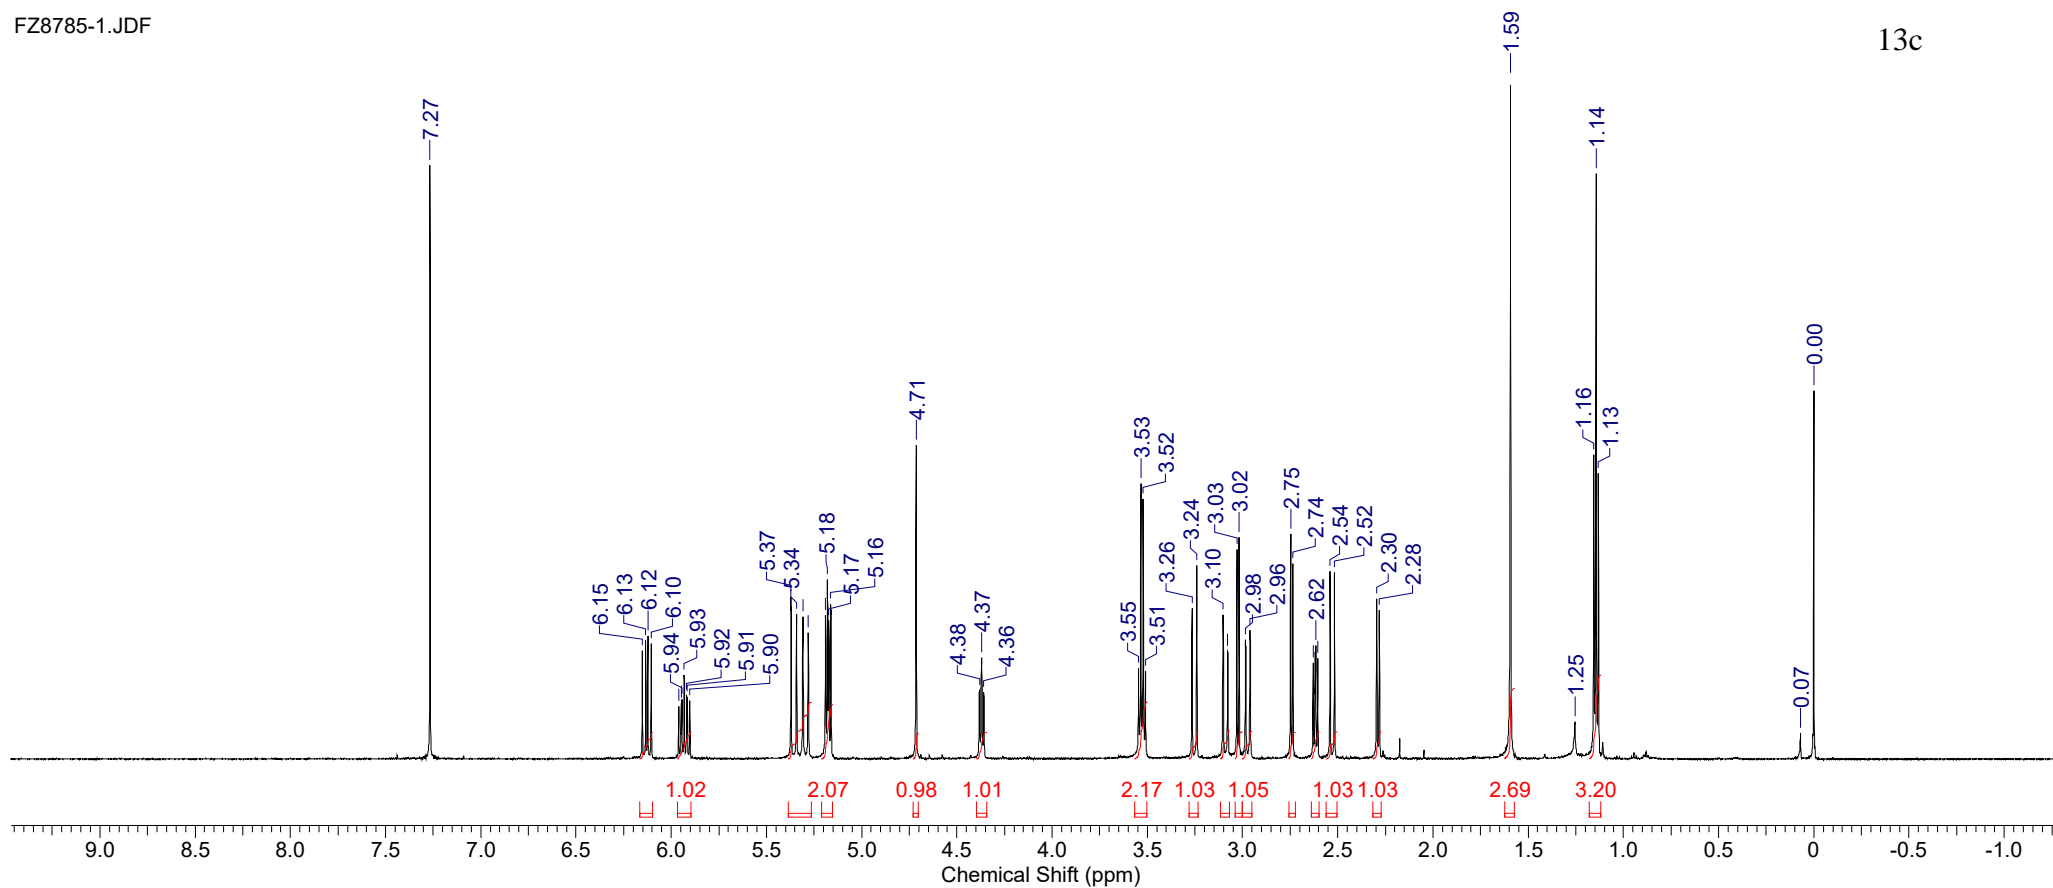

|                                                                  |                    |
|------------------------------------------------------------------|--------------------|
| <b>Formula</b> C <sub>18</sub> H <sub>21</sub> NO <sub>4</sub> S | <b>FW</b> 347.4286 |
|------------------------------------------------------------------|--------------------|

|                                                          |                                    |                                       |                                        |
|----------------------------------------------------------|------------------------------------|---------------------------------------|----------------------------------------|
| <b>Acquisition Time (sec)</b> 1.9818                     | <b>Comment</b> single_pulse        | <b>Date</b> 15 Jul 2020 09:30:10      | <b>Date Stamp</b> 15 Jul 2020 09:31:55 |
| <b>File Name</b> C:\USERS\Лабa534\DOWNLOADS\FZ8785-1.JDF | <b>Frequency (MHz)</b> 600.17      | <b>Nucleus</b> 1H                     | <b>Number of Transients</b> 8          |
| <b>Origin</b> ECA 600                                    | <b>Original Points Count</b> 32768 | <b>Owner</b> CKP                      | <b>Pulse Sequence</b> single_pulse.ex2 |
| <b>Receiver Gain</b> 48.00                               | <b>Solvent</b> CHLOROFORM-d        | <b>Spectrum Offset (Hz)</b> 5411.6367 | <b>Sweep Width (Hz)</b> 16534.39       |



13c

FZ8785-1.JDF

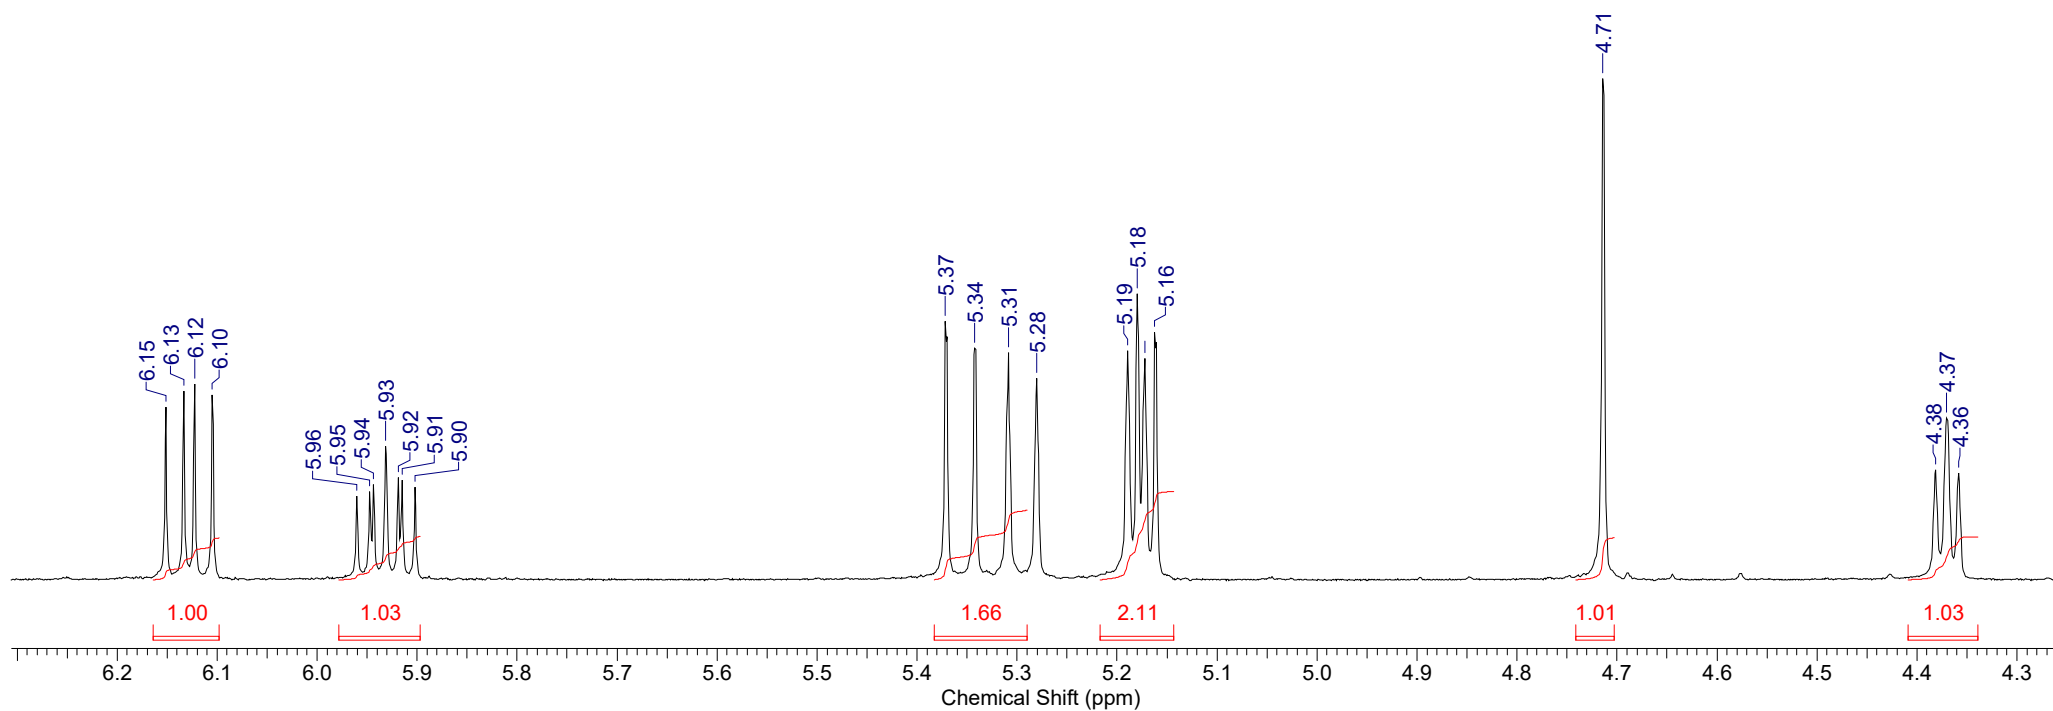

**Formula** C<sub>18</sub>H<sub>21</sub>NO<sub>4</sub>S **FW** 347.4286

|                                                           |                                    |                                       |                                        |
|-----------------------------------------------------------|------------------------------------|---------------------------------------|----------------------------------------|
| <b>Acquisition Time (sec)</b> 1.9818                      | <b>Comment</b> single_pulse        | <b>Date</b> 15 Jul 2020 09:30:10      | <b>Date Stamp</b> 15 Jul 2020 09:31:55 |
| <b>File Name</b> C:\USERS\Лаб6а534\DOWNLOADS\FZ8785-1.JDF | <b>Frequency (MHz)</b> 600.17      | <b>Nucleus</b> 1H                     | <b>Number of Transients</b> 8          |
| <b>Origin</b> ECA 600                                     | <b>Original Points Count</b> 32768 | <b>Owner</b> CKP                      | <b>Pulse Sequence</b> single_pulse.ex2 |
| <b>Receiver Gain</b> 48.00                                | <b>Solvent</b> CHLOROFORM-d        | <b>Spectrum Offset (Hz)</b> 5411.6367 | <b>Sweep Width (Hz)</b> 16534.39       |



FZ8785-1.JDF

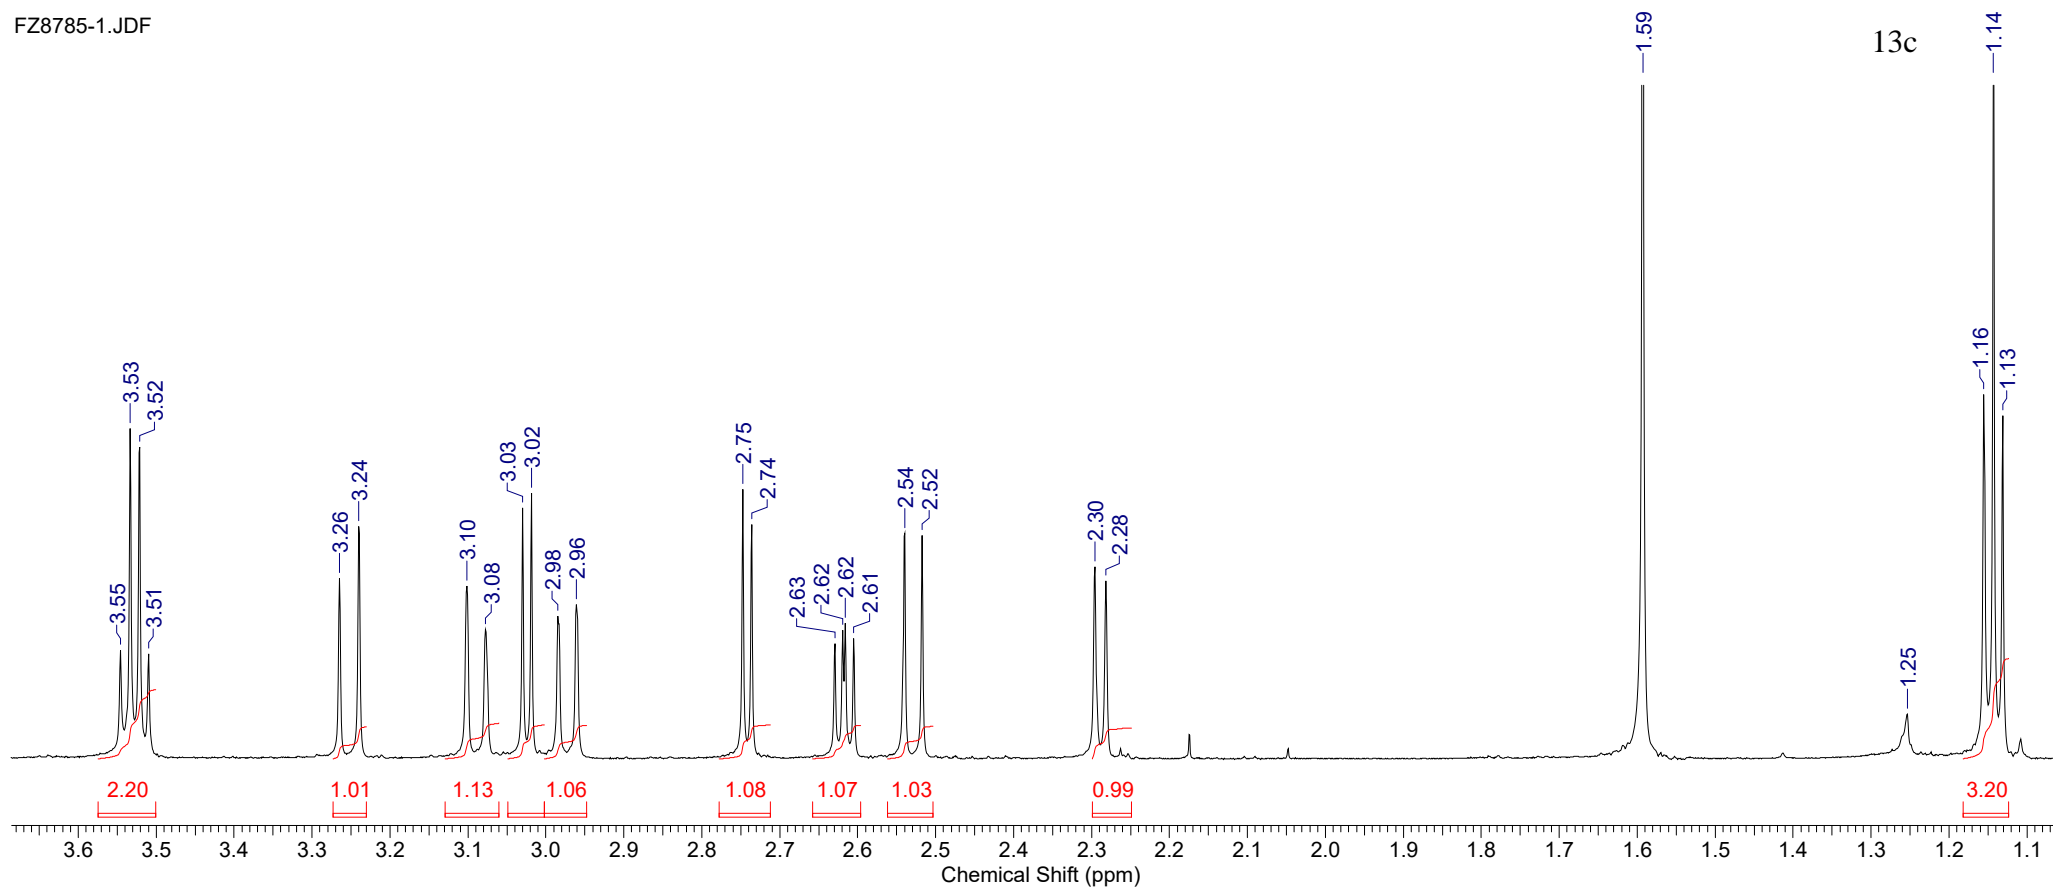



|                                                                  |                    |
|------------------------------------------------------------------|--------------------|
| <b>Formula</b> C <sub>18</sub> H <sub>21</sub> NO <sub>4</sub> S | <b>FW</b> 347.4286 |
|------------------------------------------------------------------|--------------------|

|                                        |                                                          |                                        |
|----------------------------------------|----------------------------------------------------------|----------------------------------------|
| <b>Acquisition Time (sec)</b> 0.6921   | <b>Comment</b> single pulse decoupled gated NOE          | <b>Date</b> 16 Jul 2020 11:01:22       |
| <b>Date Stamp</b> 16 Jul 2020 11:03:09 | <b>File Name</b> C:\USERS\Лабa534\DOWNLOADS\FZ8785-2.JDF |                                        |
| <b>Frequency (MHz)</b> 150.91          | <b>Nucleus</b> 13C                                       | <b>Number of Transients</b> 4000       |
| <b>Original Points Count</b> 32768     | <b>Owner</b> CKP                                         | <b>Points Count</b> 32768              |
| <b>Receiver Gain</b> 56.00             | <b>Solvent</b> CHLOROFORM-d                              | <b>Pulse Sequence</b> single pulse dec |
| <b>Sweep Width (Hz)</b> 47348.49       |                                                          | <b>Spectrum Offset (Hz)</b> 15079.3525 |

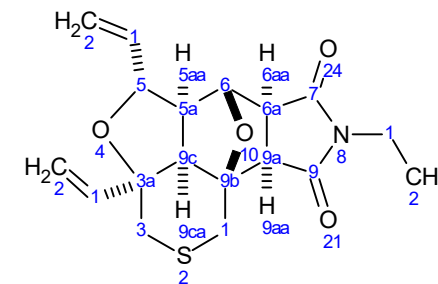

13c

FZ8785-2.JDF

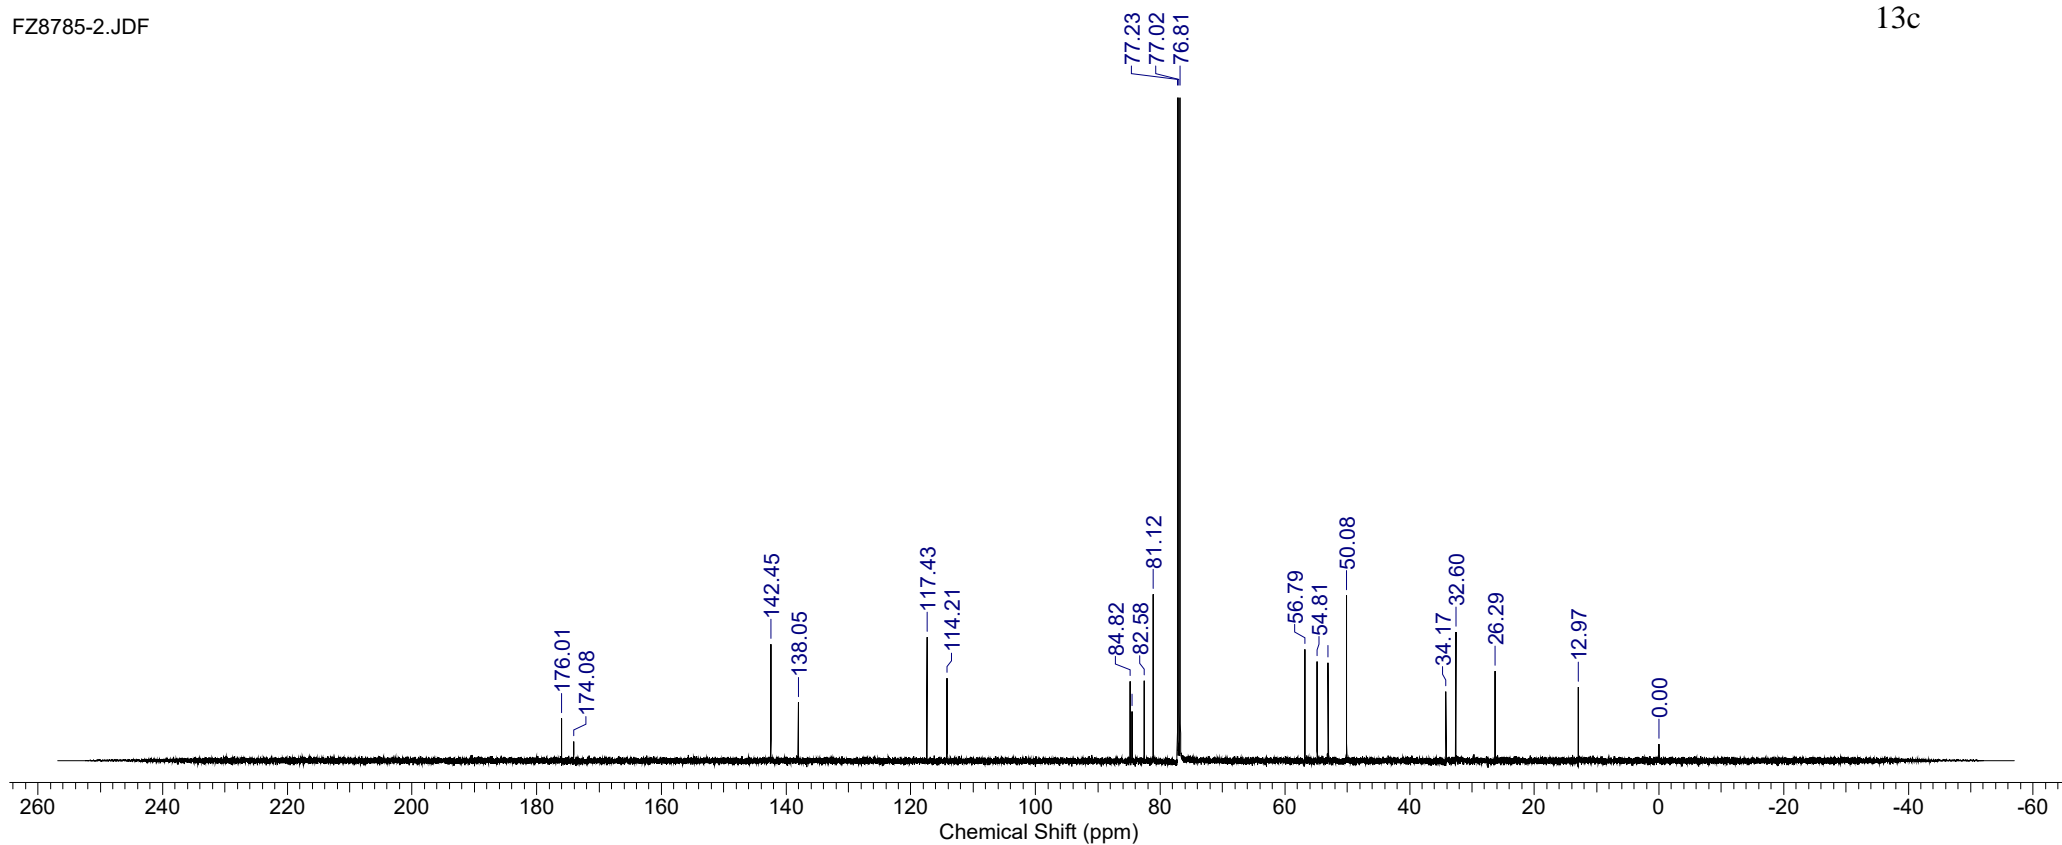

|                                                                  |                    |
|------------------------------------------------------------------|--------------------|
| <b>Formula</b> C <sub>18</sub> H <sub>21</sub> NO <sub>4</sub> S | <b>FW</b> 347.4286 |
|------------------------------------------------------------------|--------------------|

|                                        |                                                          |                                        |
|----------------------------------------|----------------------------------------------------------|----------------------------------------|
| <b>Acquisition Time (sec)</b> 0.6921   | <b>Comment</b> single pulse decoupled gated NOE          | <b>Date</b> 16 Jul 2020 11:01:22       |
| <b>Date Stamp</b> 16 Jul 2020 11:03:09 | <b>File Name</b> C:\USERS\Лабa534\DOWNLOADS\FZ8785-2.JDF |                                        |
| <b>Frequency (MHz)</b> 150.91          | <b>Nucleus</b> 13C                                       | <b>Number of Transients</b> 4000       |
| <b>Original Points Count</b> 32768     | <b>Owner</b> CKP                                         | <b>Points Count</b> 32768              |
| <b>Receiver Gain</b> 56.00             | <b>Solvent</b> CHLOROFORM-d                              | <b>Pulse Sequence</b> single pulse dec |
| <b>Sweep Width (Hz)</b> 47348.49       |                                                          | <b>Spectrum Offset (Hz)</b> 15079.3525 |



FZ8785-2.JDF

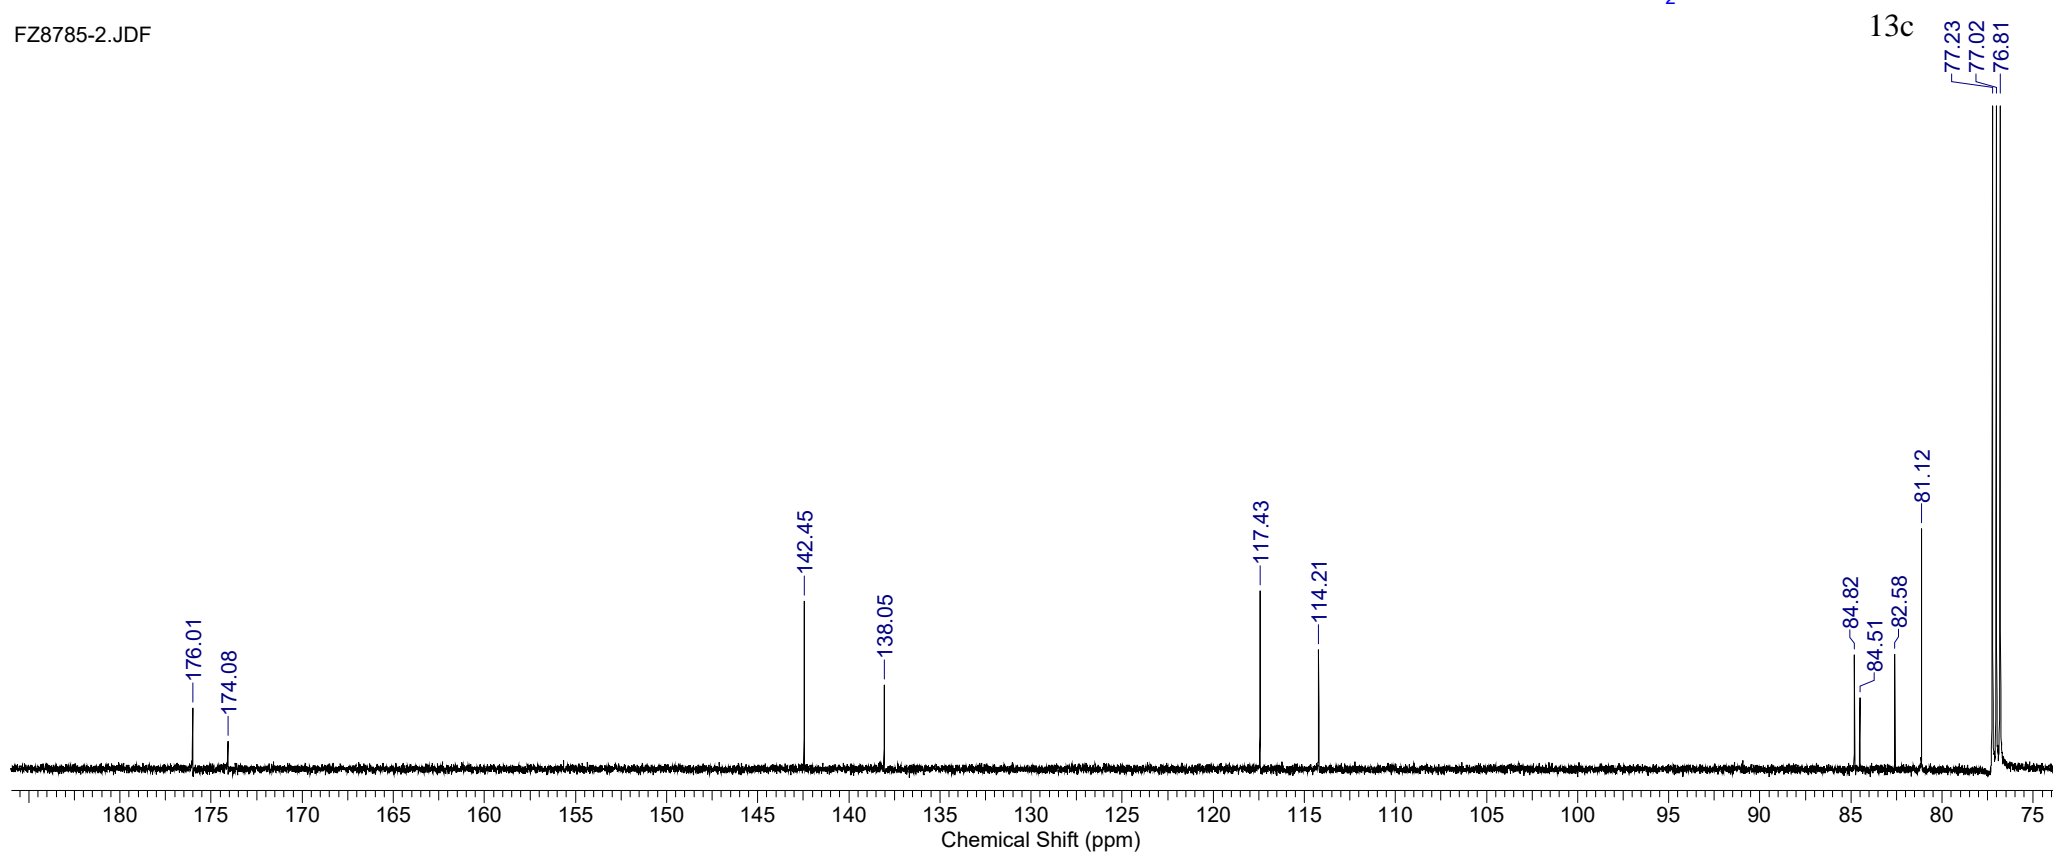

|                                                                |                    |
|----------------------------------------------------------------|--------------------|
| <b>Formula</b> C <sub>18</sub> H <sub>21</sub> NO <sub>5</sub> | <b>FW</b> 331.3630 |
|----------------------------------------------------------------|--------------------|

|                                        |                                                          |                                        |
|----------------------------------------|----------------------------------------------------------|----------------------------------------|
| <b>Acquisition Time (sec)</b> 0.6921   | <b>Comment</b> single pulse decoupled gated NOE          | <b>Date</b> 12 Feb 2020 03:36:55       |
| <b>Date Stamp</b> 12 Feb 2020 02:58:43 | <b>File Name</b> C:\USERS\Лабa534\DOWNLOADS\FZ8428-1.JDF |                                        |
| <b>Frequency (MHz)</b> 150.91          | <b>Nucleus</b> 13C                                       | <b>Number of Transients</b> 1000       |
| <b>Original Points Count</b> 32768     | <b>Owner</b> Mass                                        | <b>Points Count</b> 32768              |
| <b>Receiver Gain</b> 54.00             | <b>Solvent</b> CHLOROFORM-d                              | <b>Pulse Sequence</b> single pulse dec |
| <b>Sweep Width (Hz)</b> 47348.49       | <b>Temperature (degree C)</b> 24.100                     | <b>Spectrum Offset (Hz)</b> 15091.3428 |

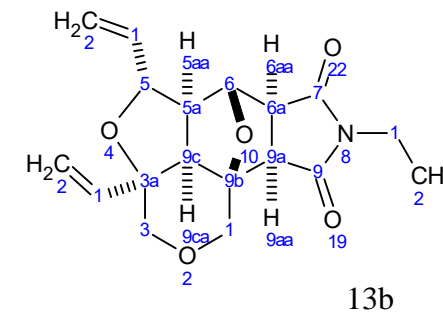

FZ8428-1.JDF

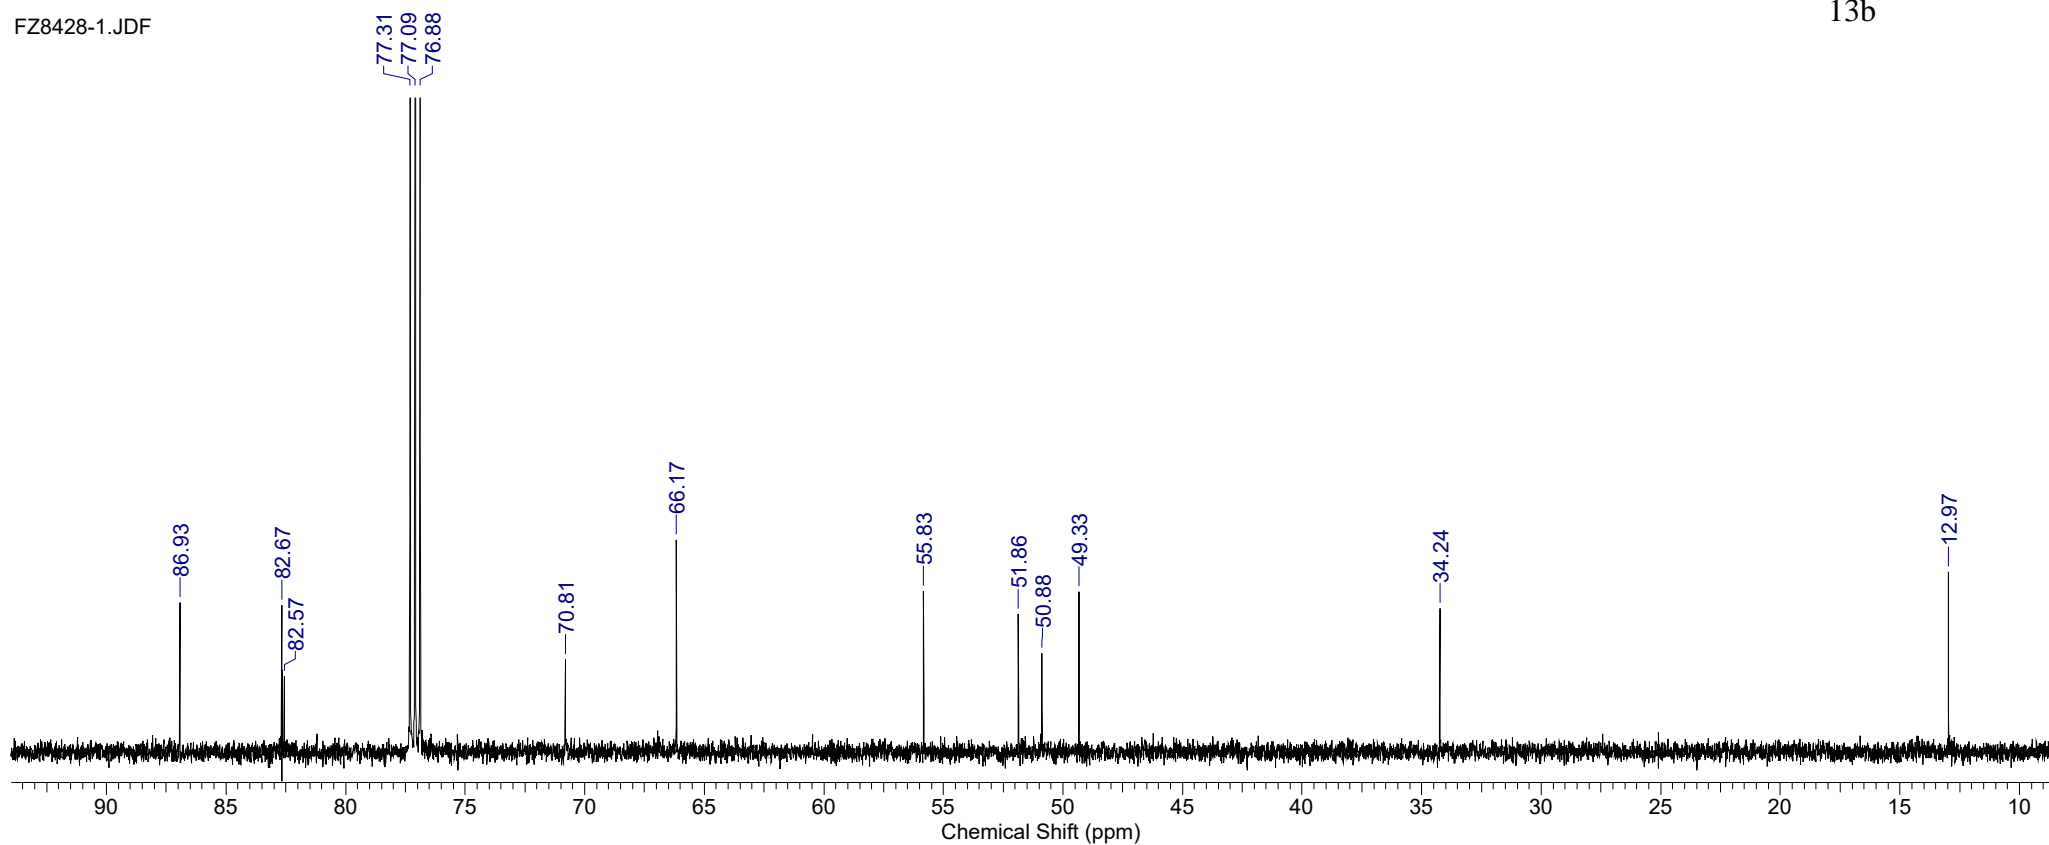

Formula C<sub>24</sub>H<sub>24</sub>N<sub>2</sub>O<sub>5</sub> FW 420.4578

|                        |                           |                       |              |                      |                      |                      |                      |
|------------------------|---------------------------|-----------------------|--------------|----------------------|----------------------|----------------------|----------------------|
| Acquisition Time (sec) | 1.9818                    | Comment               | single_pulse | Date                 | 03 Mar 2020 13:17:44 | Date Stamp           | 03 Mar 2020 12:37:33 |
| File Name              | H:\DOWNLOADS\FZ8551-1.JDF | Frequency (MHz)       | 600.17       | Nucleus              | 1H                   | Number of Transients | 8                    |
| Origin                 | ECA 600                   | Original Points Count | 32768        | Owner                | CKP                  | Points Count         | 32768                |
| Receiver Gain          | 32.00                     | Solvent               | CHLOROFORM-d | Spectrum Offset (Hz) | 5416.1777            | Pulse Sequence       | single_pulse.ex2     |
| Temperature (degree C) | 22.800                    |                       |              |                      |                      | Sweep Width (Hz)     | 16534.39             |

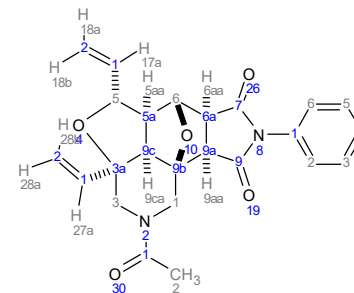

FZ8551-1 PK-0912.esp

14a

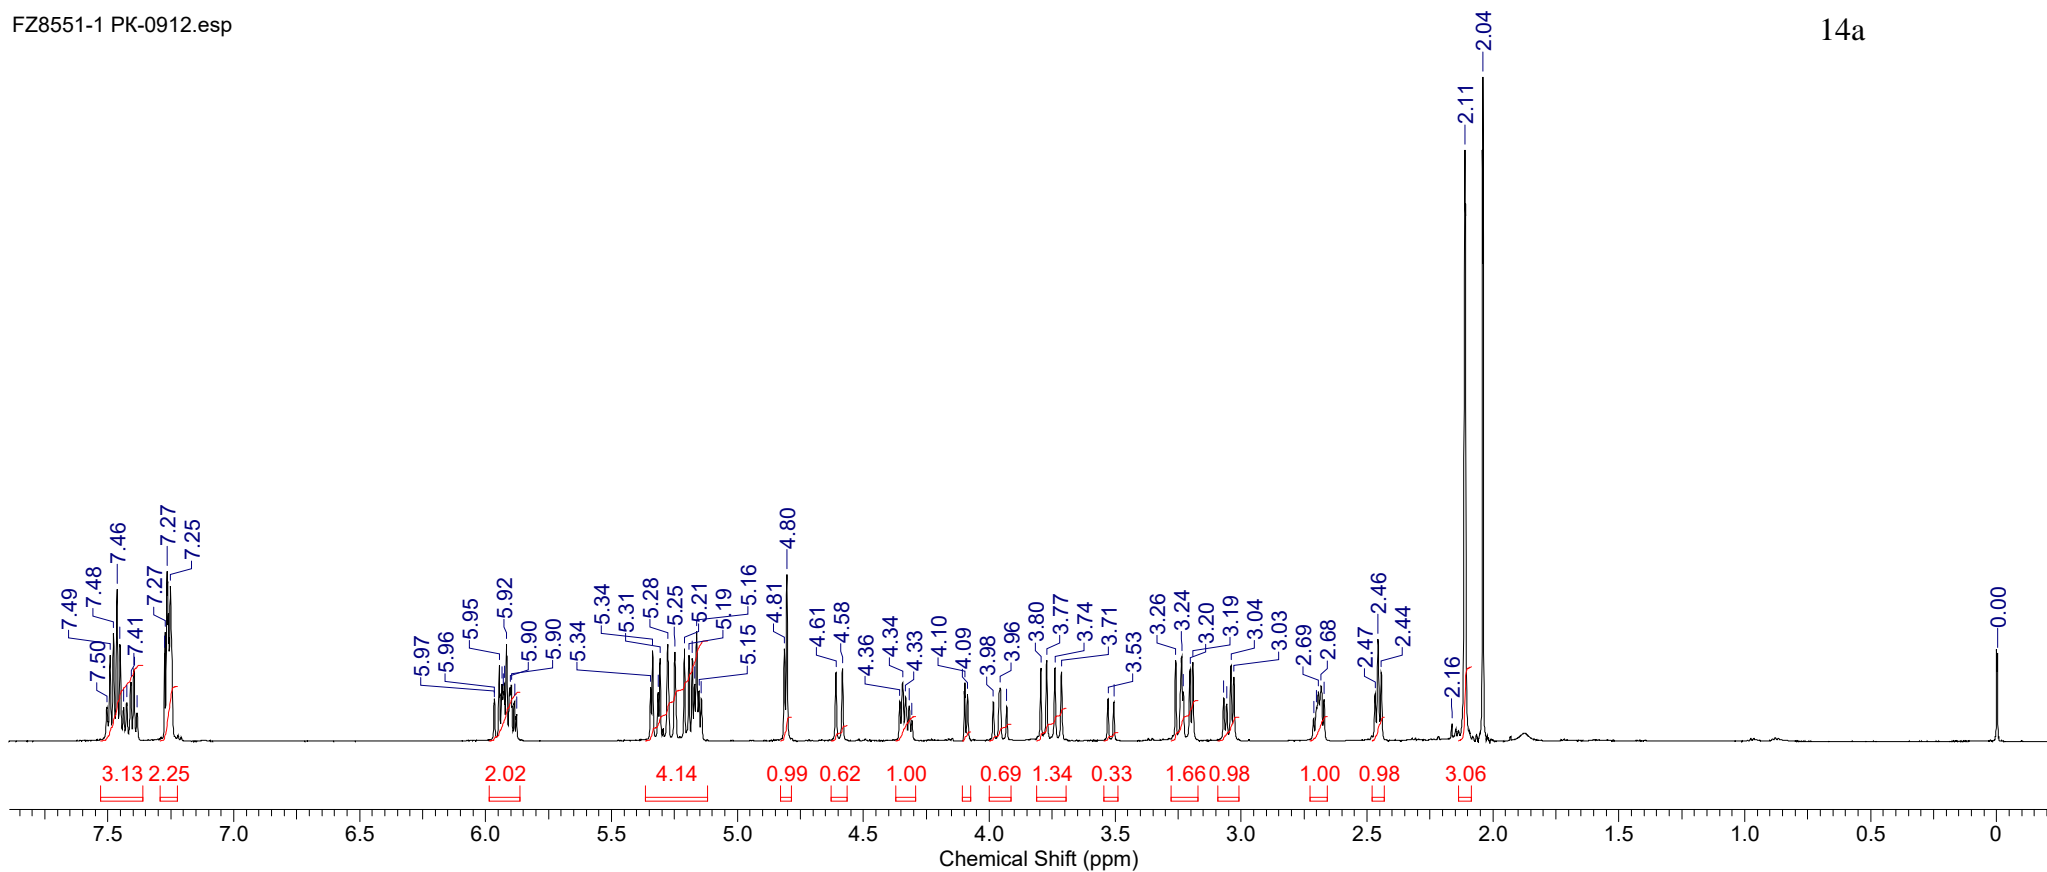

Formula C<sub>24</sub>H<sub>24</sub>N<sub>2</sub>O<sub>5</sub> FW 420.4578

|                        |                           |                       |              |                      |                      |                  |                      |                      |                  |
|------------------------|---------------------------|-----------------------|--------------|----------------------|----------------------|------------------|----------------------|----------------------|------------------|
| Acquisition Time (sec) | 1.9818                    | Comment               | single_pulse | Date                 | 03 Mar 2020 13:17:44 | Date Stamp       | 03 Mar 2020 12:37:33 |                      |                  |
| File Name              | H:\DOWNLOADS\FZ8551-1.JDF |                       |              | Frequency (MHz)      | 600.17               | Nucleus          | 1H                   | Number of Transients | 8                |
| Origin                 | ECA 600                   | Original Points Count | 32768        | Owner                | CKP                  | Points Count     | 32768                | Pulse Sequence       | single_pulse.ex2 |
| Receiver Gain          | 32.00                     | Solvent               | CHLOROFORM-d | Spectrum Offset (Hz) | 5416.1777            | Sweep Width (Hz) | 16534.39             |                      |                  |
| Temperature (degree C) | 22.800                    |                       |              |                      |                      |                  |                      |                      |                  |



14a

FZ8551-1 PK-0912.esp

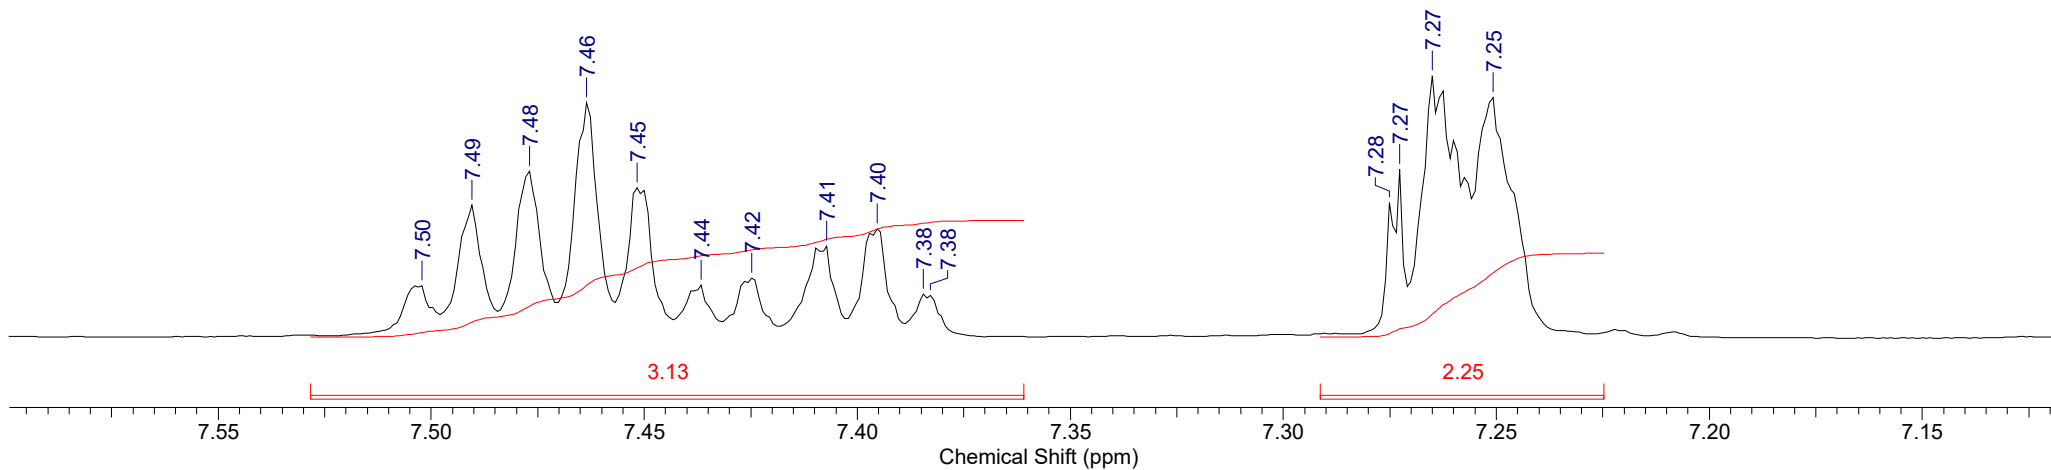

Formula C<sub>24</sub>H<sub>24</sub>N<sub>2</sub>O<sub>5</sub> FW 420.4578

|                        |                           |                       |              |                      |                      |                  |                      |
|------------------------|---------------------------|-----------------------|--------------|----------------------|----------------------|------------------|----------------------|
| Acquisition Time (sec) | 1.9818                    | Comment               | single_pulse | Date                 | 03 Mar 2020 13:17:44 | Date Stamp       | 03 Mar 2020 12:37:33 |
| File Name              | H:\DOWNLOADS\FZ8551-1.JDF |                       |              | Frequency (MHz)      | 600.17               | Nucleus          | 1H                   |
| Origin                 | ECA 600                   | Original Points Count | 32768        | Owner                | CKP                  | Points Count     | 32768                |
| Receiver Gain          | 32.00                     | Solvent               | CHLOROFORM-d | Spectrum Offset (Hz) | 5416.1777            | Sweep Width (Hz) | 16534.39             |
| Temperature (degree C) | 22.800                    |                       |              |                      |                      |                  |                      |



14a

FZ8551-1 PK-0912.esp

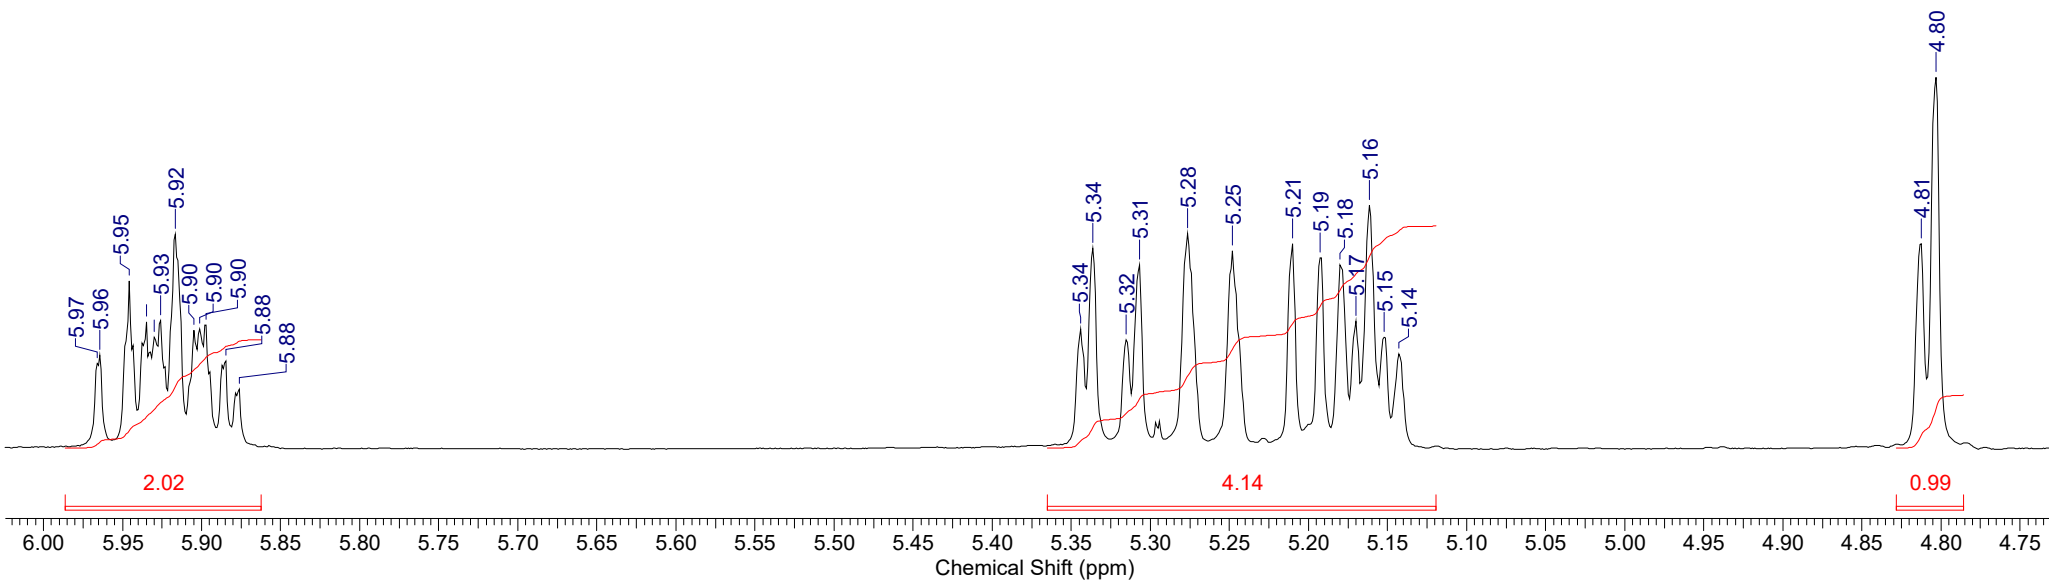

|                                                                              |                    |
|------------------------------------------------------------------------------|--------------------|
| <b>Formula</b> C <sub>24</sub> H <sub>24</sub> N <sub>2</sub> O <sub>5</sub> | <b>FW</b> 420.4578 |
|------------------------------------------------------------------------------|--------------------|

|                                            |                                    |                                       |                                        |
|--------------------------------------------|------------------------------------|---------------------------------------|----------------------------------------|
| <b>Acquisition Time (sec)</b> 1.9818       | <b>Comment</b> single_pulse        | <b>Date</b> 03 Mar 2020 13:17:44      | <b>Date Stamp</b> 03 Mar 2020 12:37:33 |
| <b>File Name</b> H:\DOWNLOADS\FZ8551-1.JDF | <b>Frequency (MHz)</b> 600.17      | <b>Nucleus</b> 1H                     | <b>Number of Transients</b> 8          |
| <b>Origin</b> ECA 600                      | <b>Original Points Count</b> 32768 | <b>Owner</b> CKP                      | <b>Points Count</b> 32768              |
| <b>Receiver Gain</b> 32.00                 | <b>Solvent</b> CHLOROFORM-d        | <b>Spectrum Offset (Hz)</b> 5416.1777 | <b>Sweep Width (Hz)</b> 16534.39       |
| <b>Temperature (degree C)</b> 22.800       |                                    |                                       |                                        |



FZ8551-1 PK-0912.esp

14a

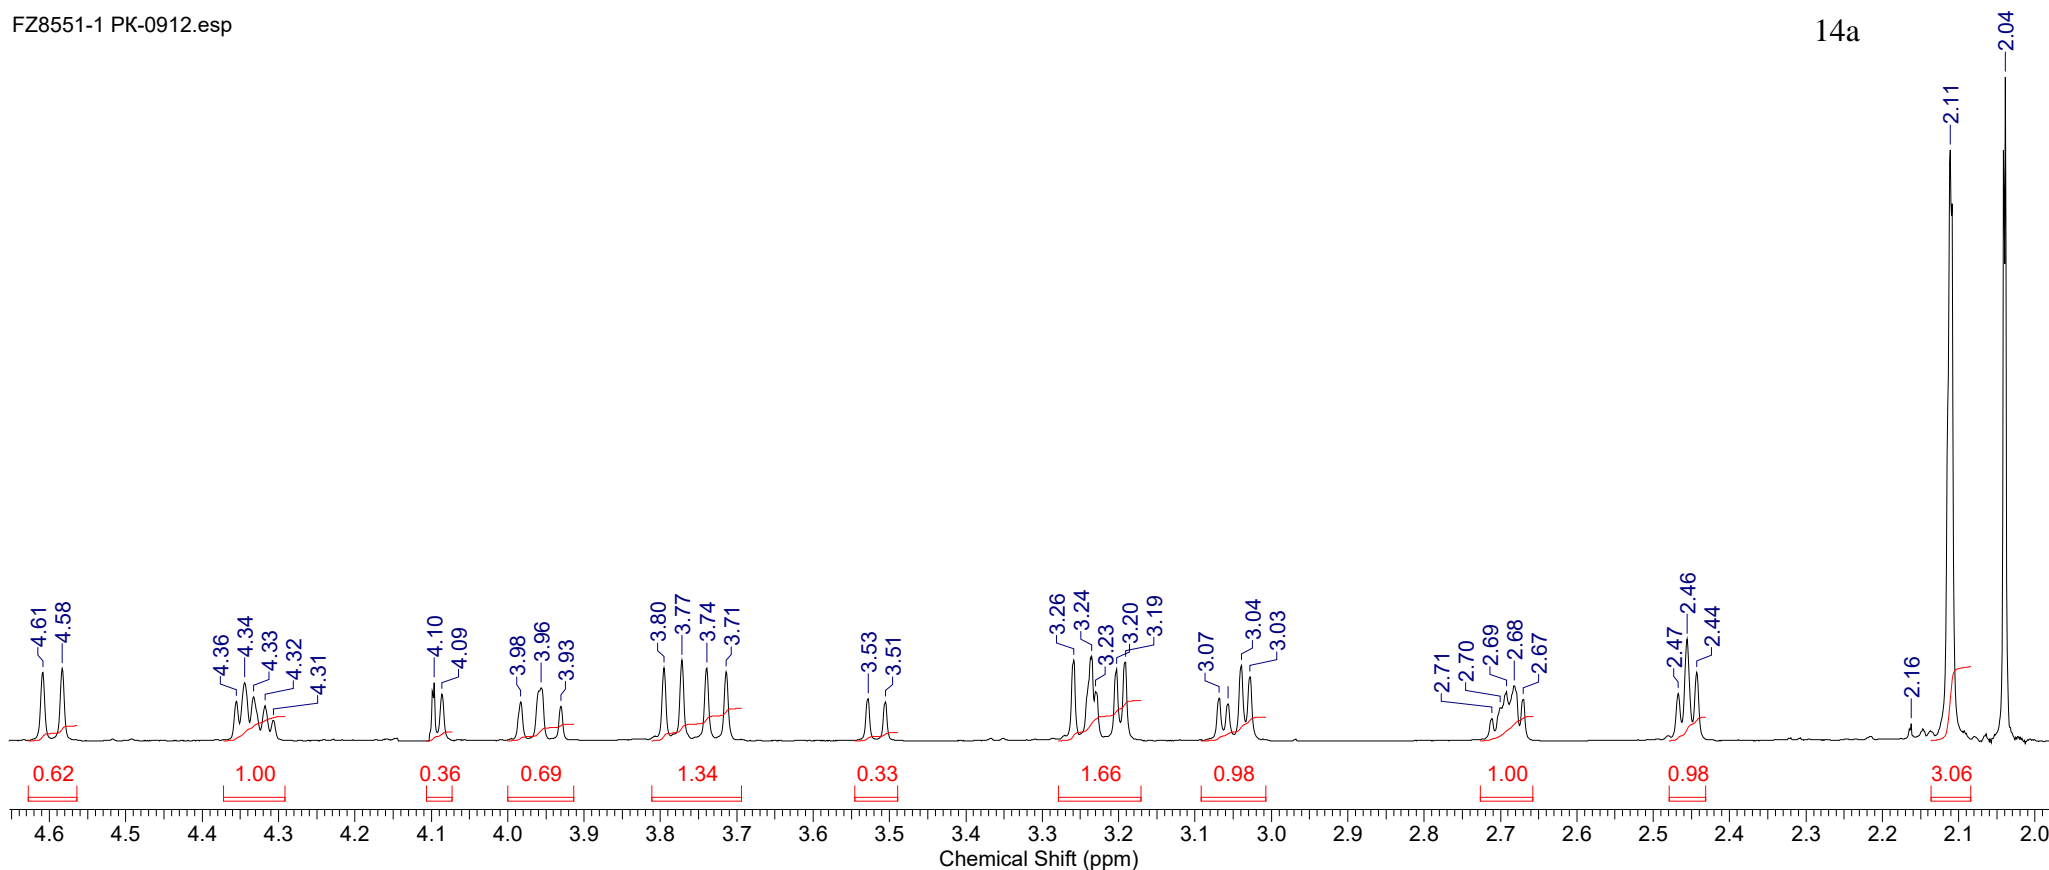

|                                                                              |                    |
|------------------------------------------------------------------------------|--------------------|
| <b>Formula</b> C <sub>24</sub> H <sub>24</sub> N <sub>2</sub> O <sub>5</sub> | <b>FW</b> 420.4578 |
|------------------------------------------------------------------------------|--------------------|

|                                        |                                                               |                                        |
|----------------------------------------|---------------------------------------------------------------|----------------------------------------|
| <b>Acquisition Time (sec)</b> 0.6921   | <b>Comment</b> single pulse decoupled gated NOE               | <b>Date</b> 18 Mar 2020 10:20:40       |
| <b>Date Stamp</b> 18 Mar 2020 09:38:51 | <b>File Name</b> C:\USERS\Л1а6а534\DOWNLOADS\FZ8626-1 (2).JDF |                                        |
| <b>Frequency (MHz)</b> 150.91          | <b>Nucleus</b> 13C                                            | <b>Number of Transients</b> 800        |
| <b>Original Points Count</b> 32768     | <b>Owner</b> CKP                                              | <b>Points Count</b> 32768              |
| <b>Receiver Gain</b> 58.00             | <b>Solvent</b> CHLOROFORM-d                                   | <b>Pulse Sequence</b> single pulse dec |
| <b>Sweep Width (Hz)</b> 47348.49       | <b>Temperature (degree C)</b> 23.300                          | <b>Spectrum Offset (Hz)</b> 15079.3525 |

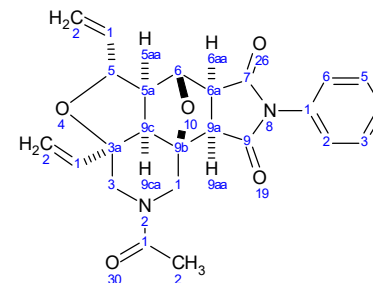

14a

FZ8626-1 (2).JDF

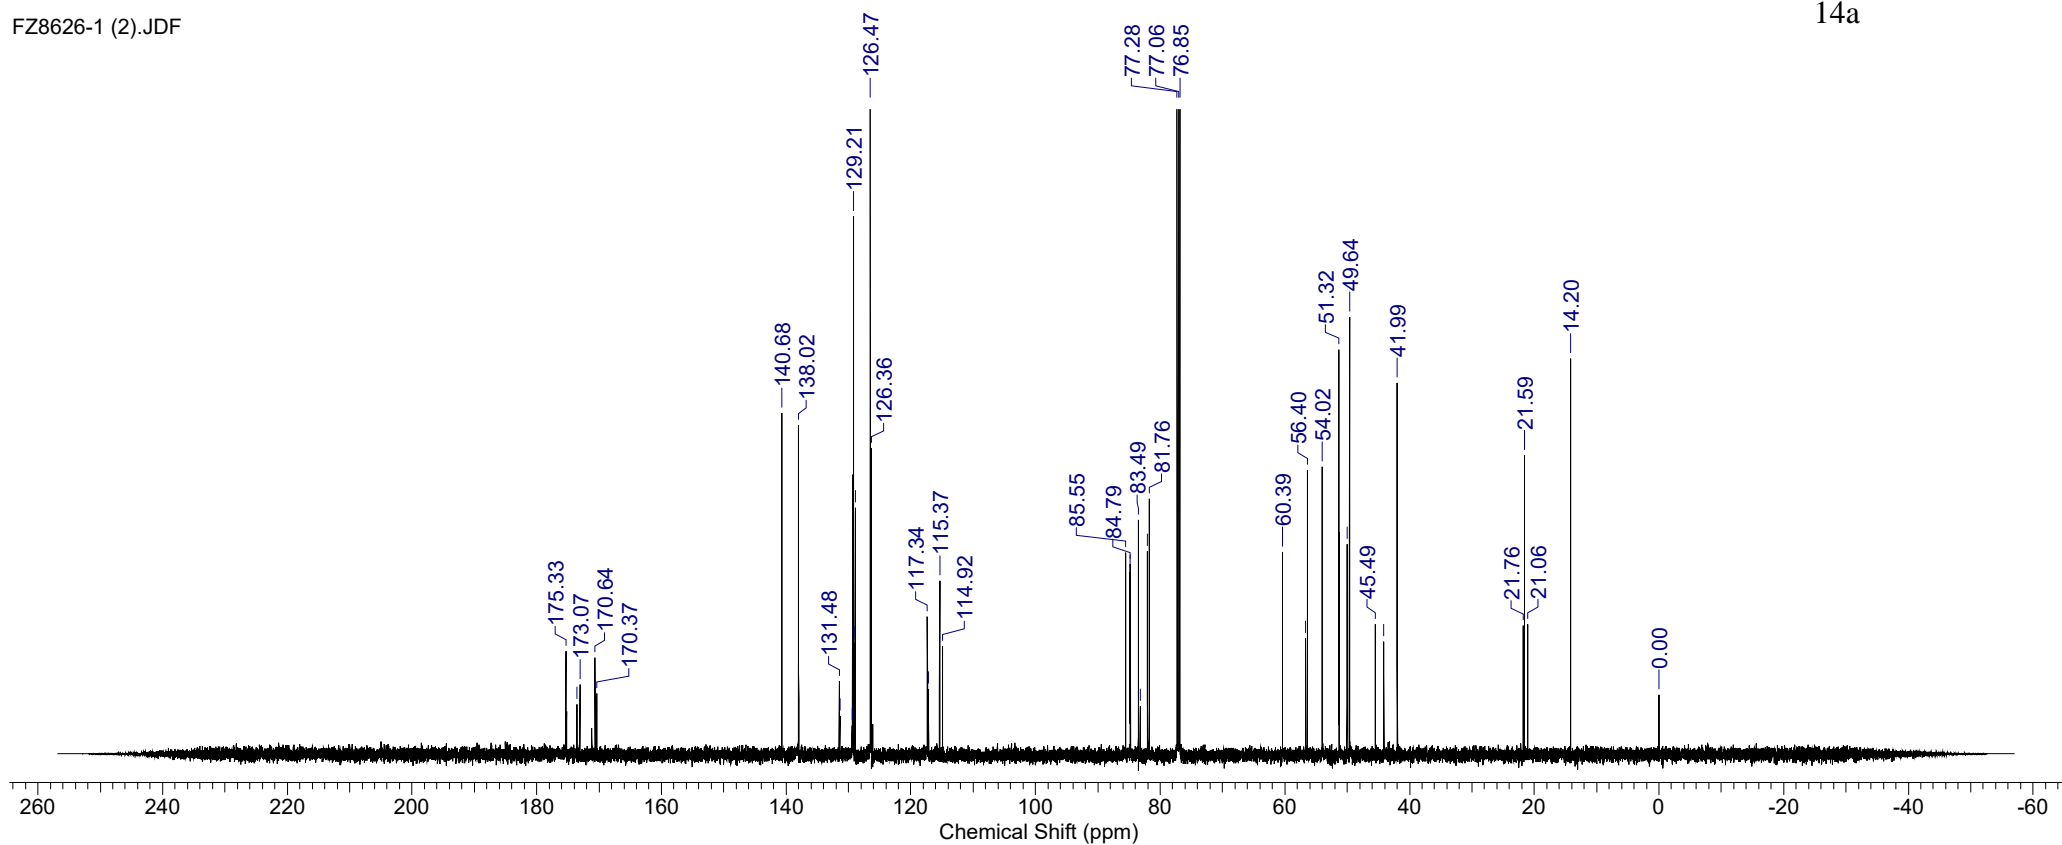



|                                                                              |                    |
|------------------------------------------------------------------------------|--------------------|
| <b>Formula</b> C <sub>24</sub> H <sub>24</sub> N <sub>2</sub> O <sub>5</sub> | <b>FW</b> 420.4578 |
|------------------------------------------------------------------------------|--------------------|

|                                        |                                                              |                                        |
|----------------------------------------|--------------------------------------------------------------|----------------------------------------|
| <b>Acquisition Time (sec)</b> 0.6921   | <b>Comment</b> single pulse decoupled gated NOE              | <b>Date</b> 18 Mar 2020 10:20:40       |
| <b>Date Stamp</b> 18 Mar 2020 09:38:51 | <b>File Name</b> C:\USERS\Лабa534\DOWNLOADS\FZ8626-1 (2).JDF |                                        |
| <b>Frequency (MHz)</b> 150.91          | <b>Nucleus</b> 13C                                           | <b>Number of Transients</b> 800        |
| <b>Original Points Count</b> 32768     | <b>Owner</b> CKP                                             | <b>Points Count</b> 32768              |
| <b>Receiver Gain</b> 58.00             | <b>Solvent</b> CHLOROFORM-d                                  | <b>Pulse Sequence</b> single pulse dec |
| <b>Sweep Width (Hz)</b> 47348.49       | <b>Temperature (degree C)</b> 23.300                         | <b>Spectrum Offset (Hz)</b> 15079.3525 |

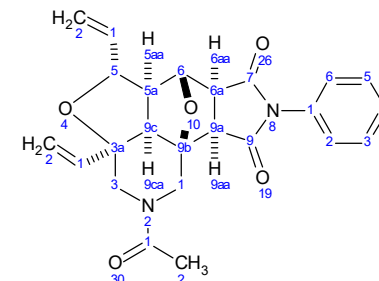

14a

FZ8626-1 (2).JDF

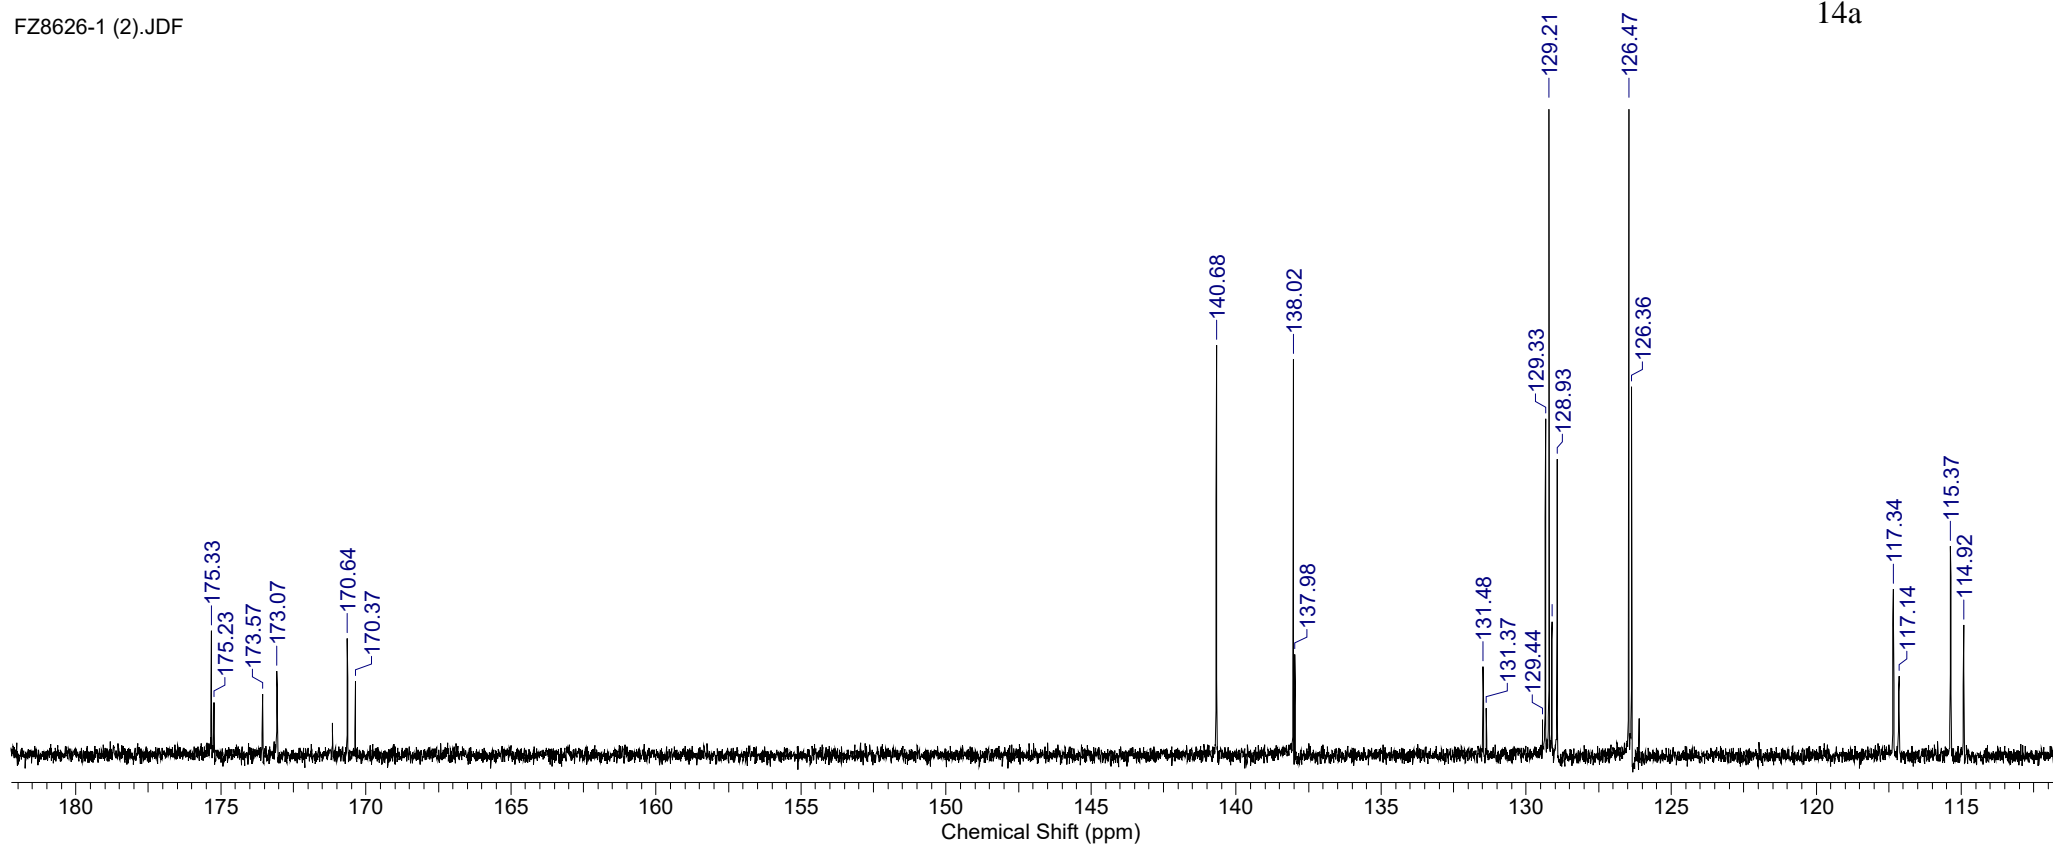

|                                                                              |                    |
|------------------------------------------------------------------------------|--------------------|
| <b>Formula</b> C <sub>24</sub> H <sub>24</sub> N <sub>2</sub> O <sub>5</sub> | <b>FW</b> 420.4578 |
|------------------------------------------------------------------------------|--------------------|

|                                        |                                                               |                                        |
|----------------------------------------|---------------------------------------------------------------|----------------------------------------|
| <b>Acquisition Time (sec)</b> 0.6921   | <b>Comment</b> single pulse decoupled gated NOE               | <b>Date</b> 18 Mar 2020 10:20:40       |
| <b>Date Stamp</b> 18 Mar 2020 09:38:51 | <b>File Name</b> C:\USERS\Лаб6a534\DOWNLOADS\FZ8626-1 (2).JDF |                                        |
| <b>Frequency (MHz)</b> 150.91          | <b>Nucleus</b> 13C                                            | <b>Number of Transients</b> 800        |
| <b>Original Points Count</b> 32768     | <b>Owner</b> CKP                                              | <b>Points Count</b> 32768              |
| <b>Receiver Gain</b> 58.00             | <b>Solvent</b> CHLOROFORM-d                                   | <b>Pulse Sequence</b> single pulse dec |
| <b>Sweep Width (Hz)</b> 47348.49       | <b>Temperature (degree C)</b> 23.300                          | <b>Spectrum Offset (Hz)</b> 15079.3525 |

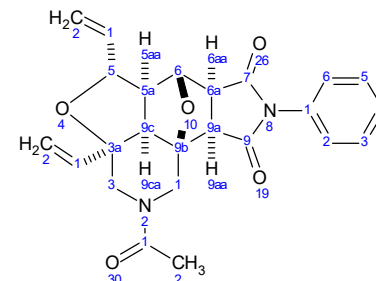

FZ8626-1 (2).JDF

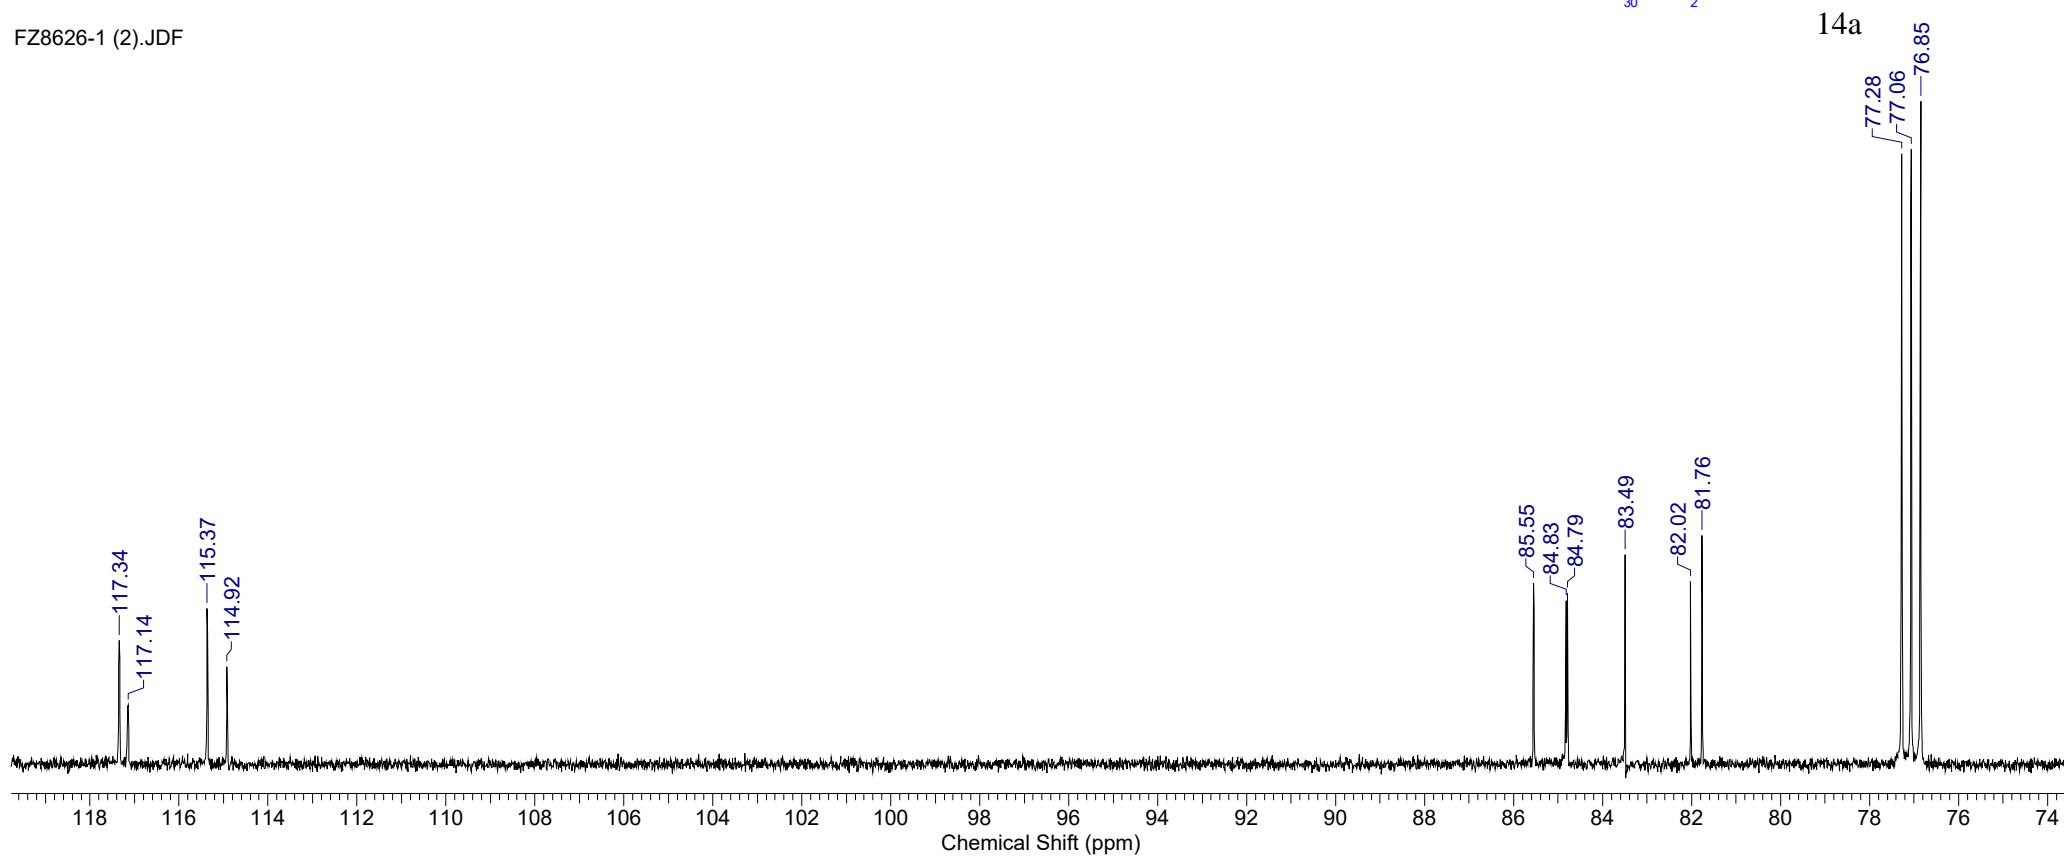

|                                                                              |                    |
|------------------------------------------------------------------------------|--------------------|
| <b>Formula</b> C <sub>24</sub> H <sub>24</sub> N <sub>2</sub> O <sub>5</sub> | <b>FW</b> 420.4578 |
|------------------------------------------------------------------------------|--------------------|

|                                        |                                                               |                                        |
|----------------------------------------|---------------------------------------------------------------|----------------------------------------|
| <b>Acquisition Time (sec)</b> 0.6921   | <b>Comment</b> single pulse decoupled gated NOE               | <b>Date</b> 18 Mar 2020 10:20:40       |
| <b>Date Stamp</b> 18 Mar 2020 09:38:51 | <b>File Name</b> C:\USERS\Л1а6а534\DOWNLOADS\FZ8626-1 (2).JDF |                                        |
| <b>Frequency (MHz)</b> 150.91          | <b>Nucleus</b> 13C                                            | <b>Number of Transients</b> 800        |
| <b>Original Points Count</b> 32768     | <b>Owner</b> CKP                                              | <b>Points Count</b> 32768              |
| <b>Receiver Gain</b> 58.00             | <b>Solvent</b> CHLOROFORM-d                                   | <b>Pulse Sequence</b> single pulse dec |
| <b>Sweep Width (Hz)</b> 47348.49       | <b>Temperature (degree C)</b> 23.300                          | <b>Spectrum Offset (Hz)</b> 15079.3525 |



14a

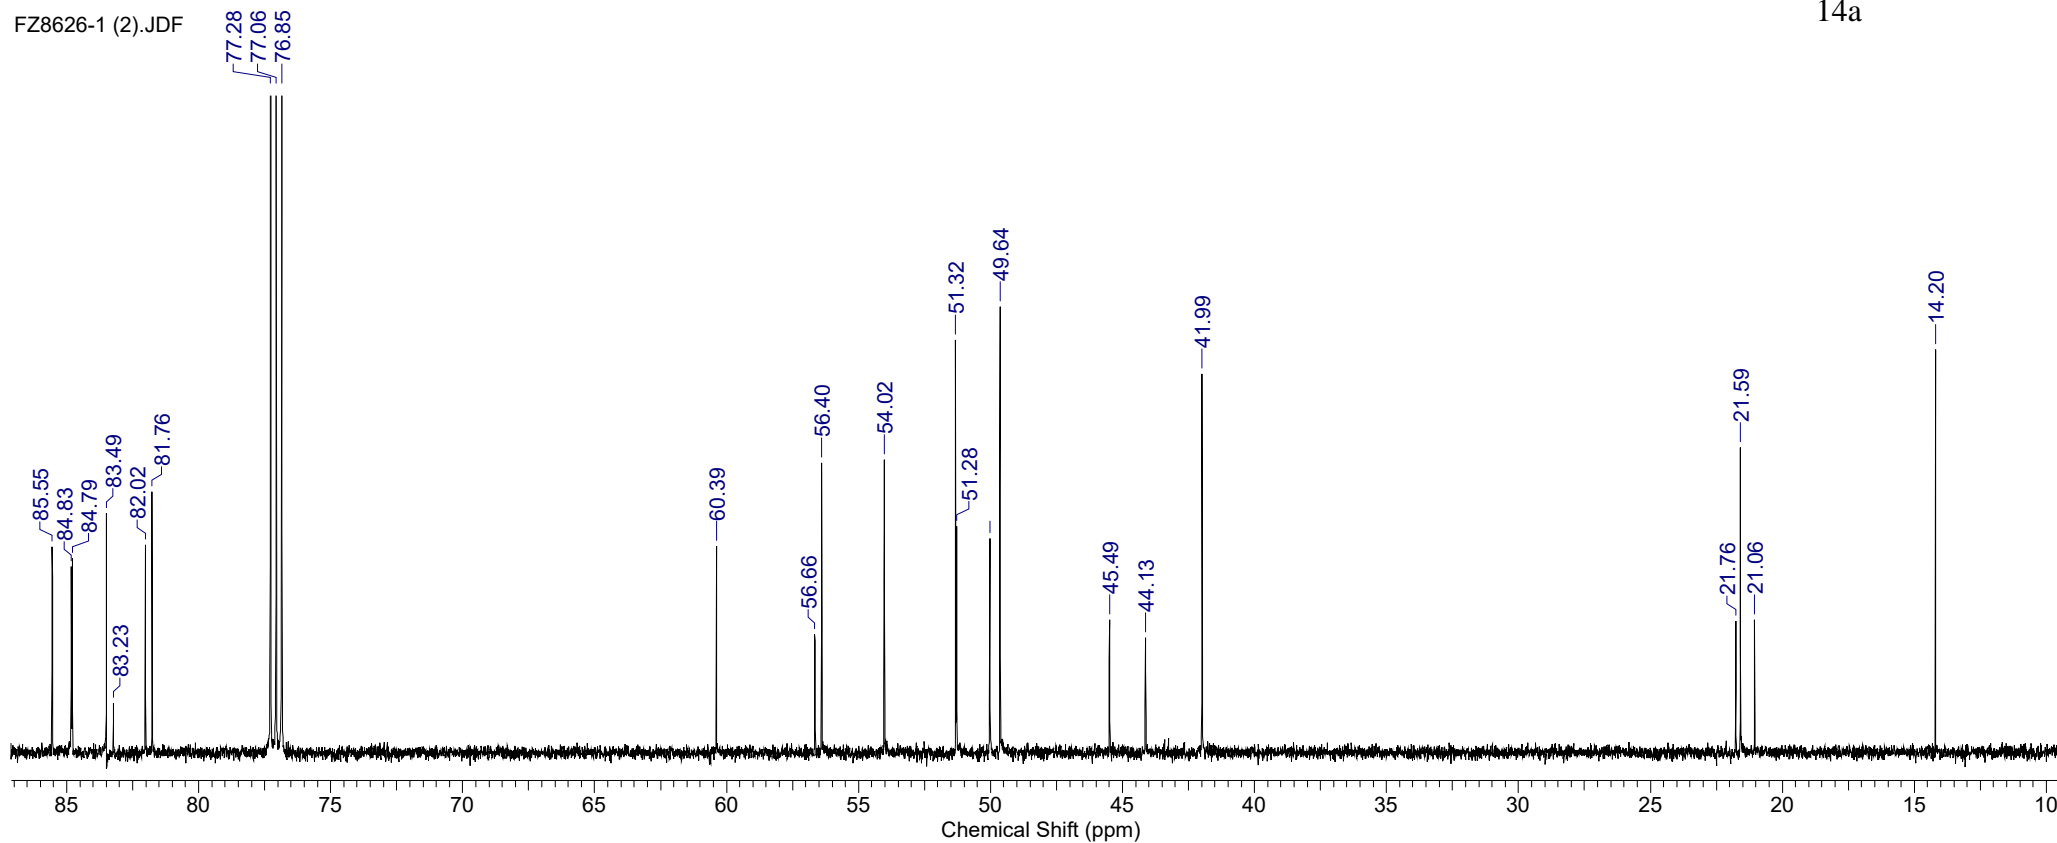

|                                                                              |                    |
|------------------------------------------------------------------------------|--------------------|
| <b>Formula</b> C <sub>27</sub> H <sub>30</sub> N <sub>2</sub> O <sub>6</sub> | <b>FW</b> 478.5369 |
|------------------------------------------------------------------------------|--------------------|

|                                        |                                                              |                                      |                               |
|----------------------------------------|--------------------------------------------------------------|--------------------------------------|-------------------------------|
| <b>Acquisition Time (sec)</b> 0.9909   | <b>Comment</b> single_pulse                                  | <b>Date</b> 07 Feb 2020 08:29:58     | <b>Frequency (MHz)</b> 600.17 |
| <b>Date Stamp</b> 19 Feb 2020 10:15:38 | <b>File Name</b> C:\USERS\Лa6a534\DOWNLOADS\FZ8486-1 (1).JDF | <b>Original Points Count</b> 16384   | <b>Owner</b> CKP              |
| <b>Nucleus</b> 1H                      | <b>Number of Transients</b> 8                                | <b>Origin</b> ECA 600                | <b>Solvent</b> CHLOROFORM-d   |
| <b>Points Count</b> 16384              | <b>Pulse Sequence</b> single_pulse.ex2                       | <b>Receiver Gain</b> 38.00           |                               |
| <b>Spectrum Offset (Hz)</b> 5409.0264  | <b>Sweep Width (Hz)</b> 16534.39                             | <b>Temperature (degree C)</b> 22.600 |                               |

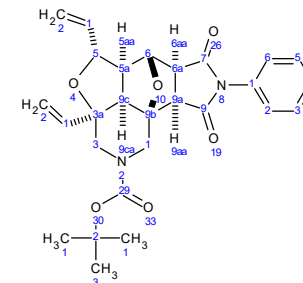

14b

FZ8486-1 (1) 2101.ESP

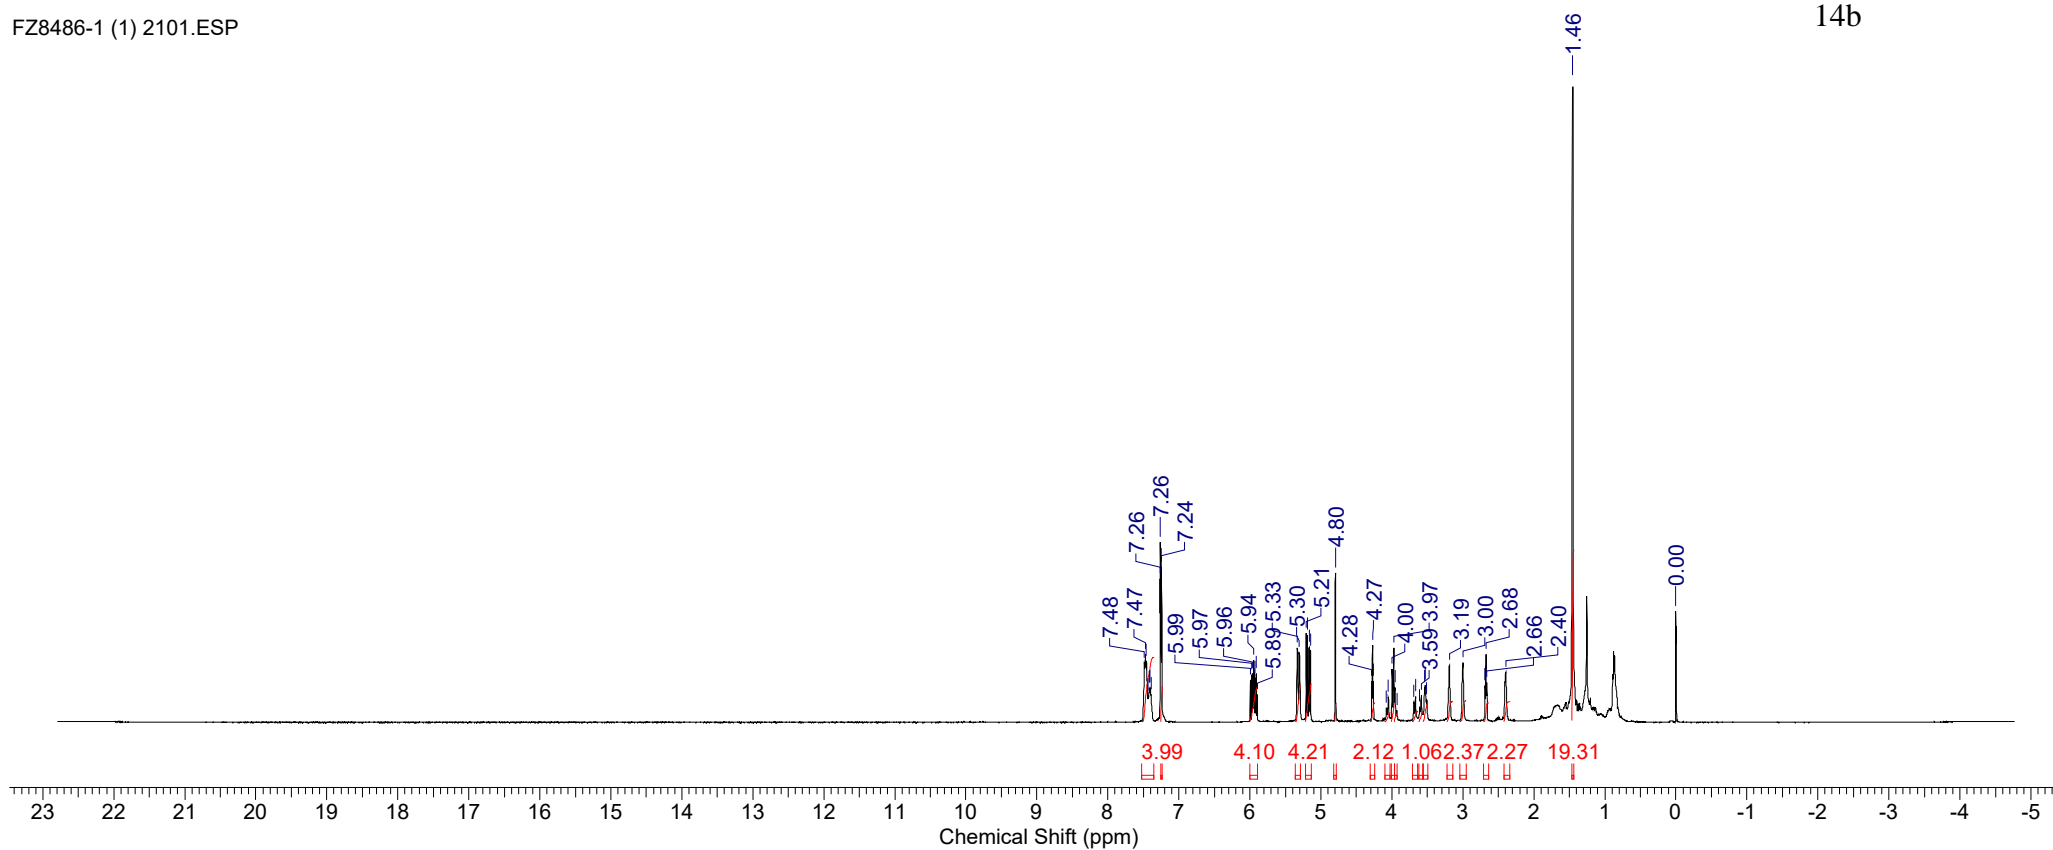

Formula  $C_{27}H_{30}N_2O_6$  FW 478.5369

|                        |                      |                        |                                             |                       |                      |
|------------------------|----------------------|------------------------|---------------------------------------------|-----------------------|----------------------|
| Acquisition Time (sec) | 0.9909               | Comment                | single_pulse                                | Date                  | 07 Feb 2020 08:29:58 |
| Date Stamp             | 19 Feb 2020 10:15:38 | File Name              | C:\USERS\Лa6a534\DOWNLOADS\FZ8486-1 (1).JDF |                       |                      |
| Nucleus                | 1H                   | Number of Transients   | 8                                           | Origin                | ECA 600              |
| Points Count           | 16384                | Pulse Sequence         | single_pulse.ex2                            | Original Points Count | 16384                |
| Spectrum Offset (Hz)   | 5409.0264            | Sweep Width (Hz)       | 16534.39                                    | Receiver Gain         | 38.00                |
|                        |                      | Temperature (degree C) | 22.600                                      |                       |                      |
|                        |                      | Frequency (MHz)        | 600.17                                      |                       |                      |
|                        |                      | Owner                  | CKP                                         |                       |                      |
|                        |                      | Solvent                | CHLOROFORM-d                                |                       |                      |

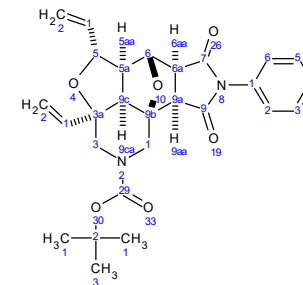

14b

FZ8486-1 (1) 2101.ESP

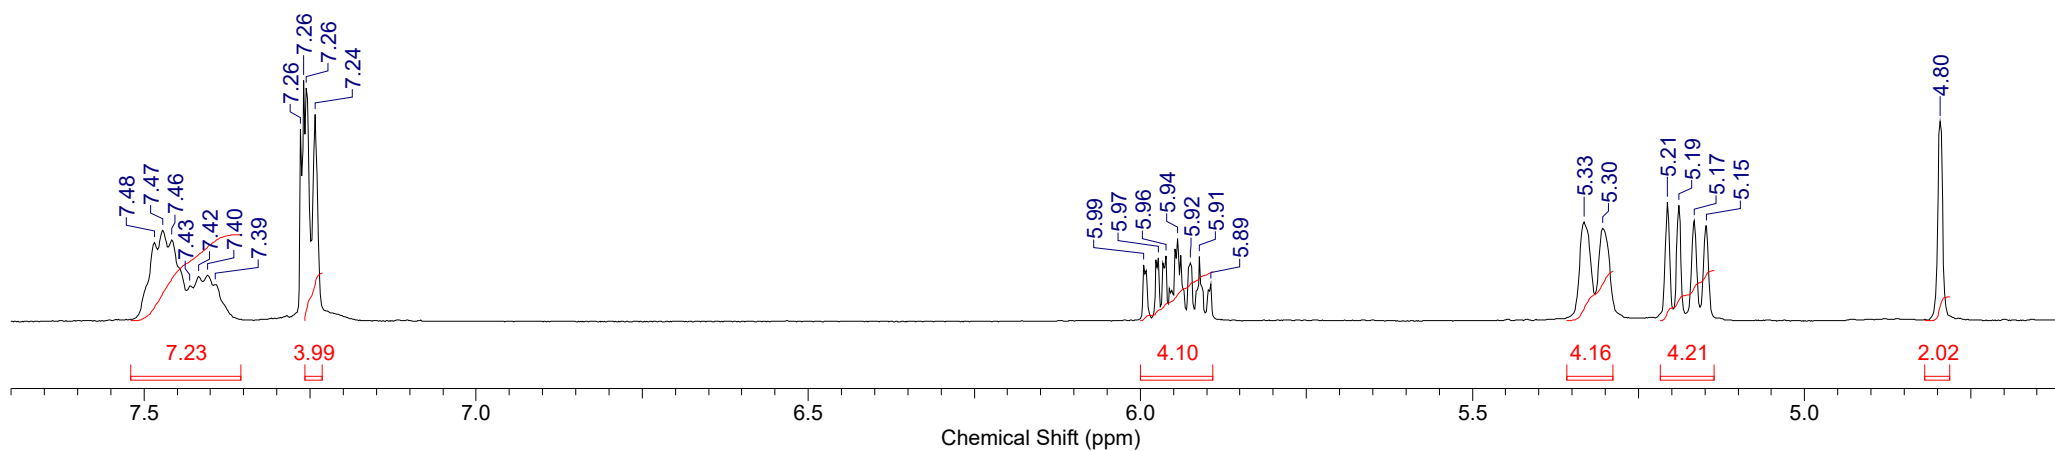

Formula  $C_{27}H_{30}N_2O_6$  FW 478.5369

|                        |                      |                        |                                             |                       |                      |
|------------------------|----------------------|------------------------|---------------------------------------------|-----------------------|----------------------|
| Acquisition Time (sec) | 0.9909               | Comment                | single_pulse                                | Date                  | 07 Feb 2020 08:29:58 |
| Date Stamp             | 19 Feb 2020 10:15:38 | File Name              | C:\USERS\Лa6a534\DOWNLOADS\FZ8486-1 (1).JDF |                       |                      |
| Nucleus                | 1H                   | Number of Transients   | 8                                           | Origin                | ECA 600              |
| Points Count           | 16384                | Pulse Sequence         | single_pulse.ex2                            | Original Points Count | 16384                |
| Spectrum Offset (Hz)   | 5409.0264            | Sweep Width (Hz)       | 16534.39                                    | Receiver Gain         | 38.00                |
|                        |                      | Temperature (degree C) | 22.600                                      |                       |                      |
|                        |                      |                        |                                             | Frequency (MHz)       | 600.17               |
|                        |                      |                        |                                             | Owner                 | CKP                  |
|                        |                      |                        |                                             | Solvent               | CHLOROFORM-d         |



FZ8486-1 (1) 2101.ESP

14b

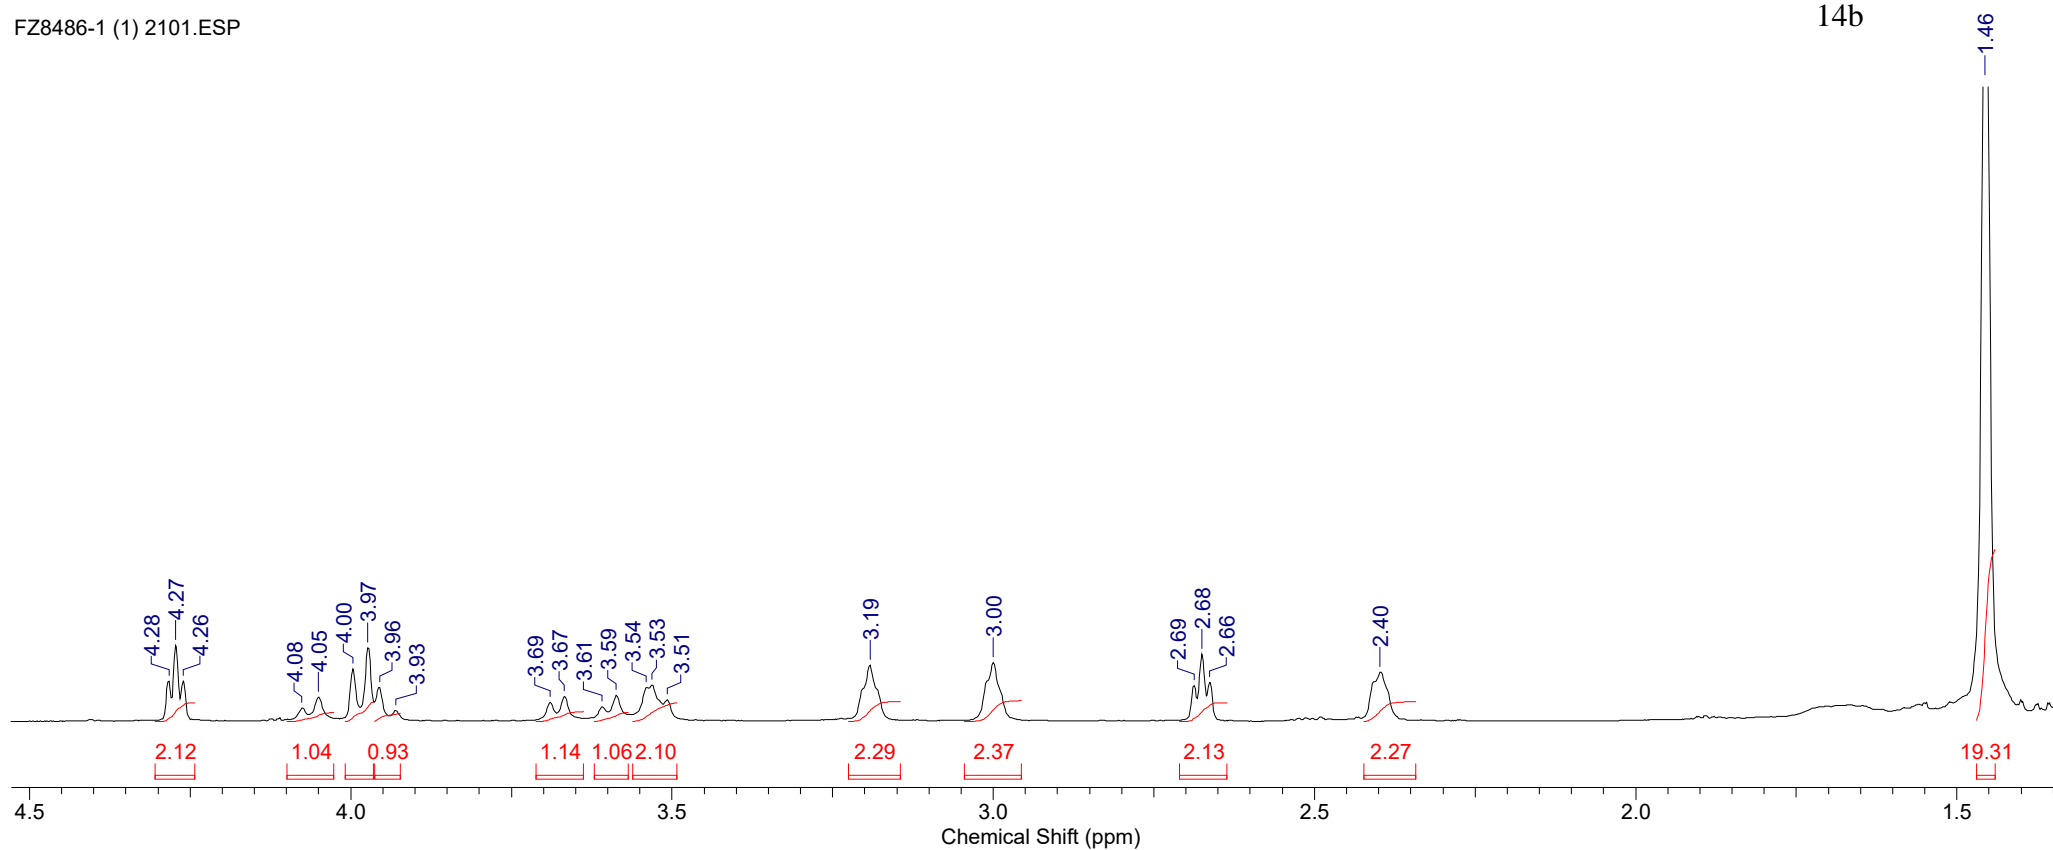

|                                                                              |                    |
|------------------------------------------------------------------------------|--------------------|
| <b>Formula</b> C <sub>27</sub> H <sub>30</sub> N <sub>2</sub> O <sub>6</sub> | <b>FW</b> 478.5369 |
|------------------------------------------------------------------------------|--------------------|

|                                        |                                                           |                                        |
|----------------------------------------|-----------------------------------------------------------|----------------------------------------|
| <b>Acquisition Time (sec)</b> 0.6921   | <b>Comment</b> single pulse decoupled gated NOE           | <b>Date</b> 11 Jul 2020 01:04:25       |
| <b>Date Stamp</b> 11 Jul 2020 01:06:03 | <b>File Name</b> C:\USERS\J1a6a534\DOWNLOADS\FZ8767-1.JDF |                                        |
| <b>Frequency (MHz)</b> 150.91          | <b>Nucleus</b> 13C                                        | <b>Number of Transients</b> 8000       |
| <b>Original Points Count</b> 32768     | <b>Owner</b> CKP                                          | <b>Points Count</b> 32768              |
| <b>Receiver Gain</b> 58.00             | <b>Solvent</b> CHLOROFORM-d                               | <b>Pulse Sequence</b> single pulse dec |
| <b>Sweep Width (Hz)</b> 47348.49       | <b>Temperature (degree C)</b> 28.600                      | <b>Spectrum Offset (Hz)</b> 15080.7979 |

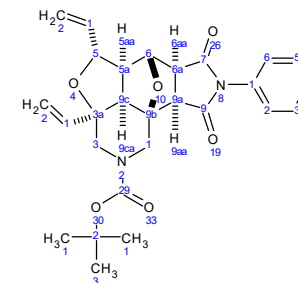

14b

FZ8767-1 PK-2101-13C.ESP

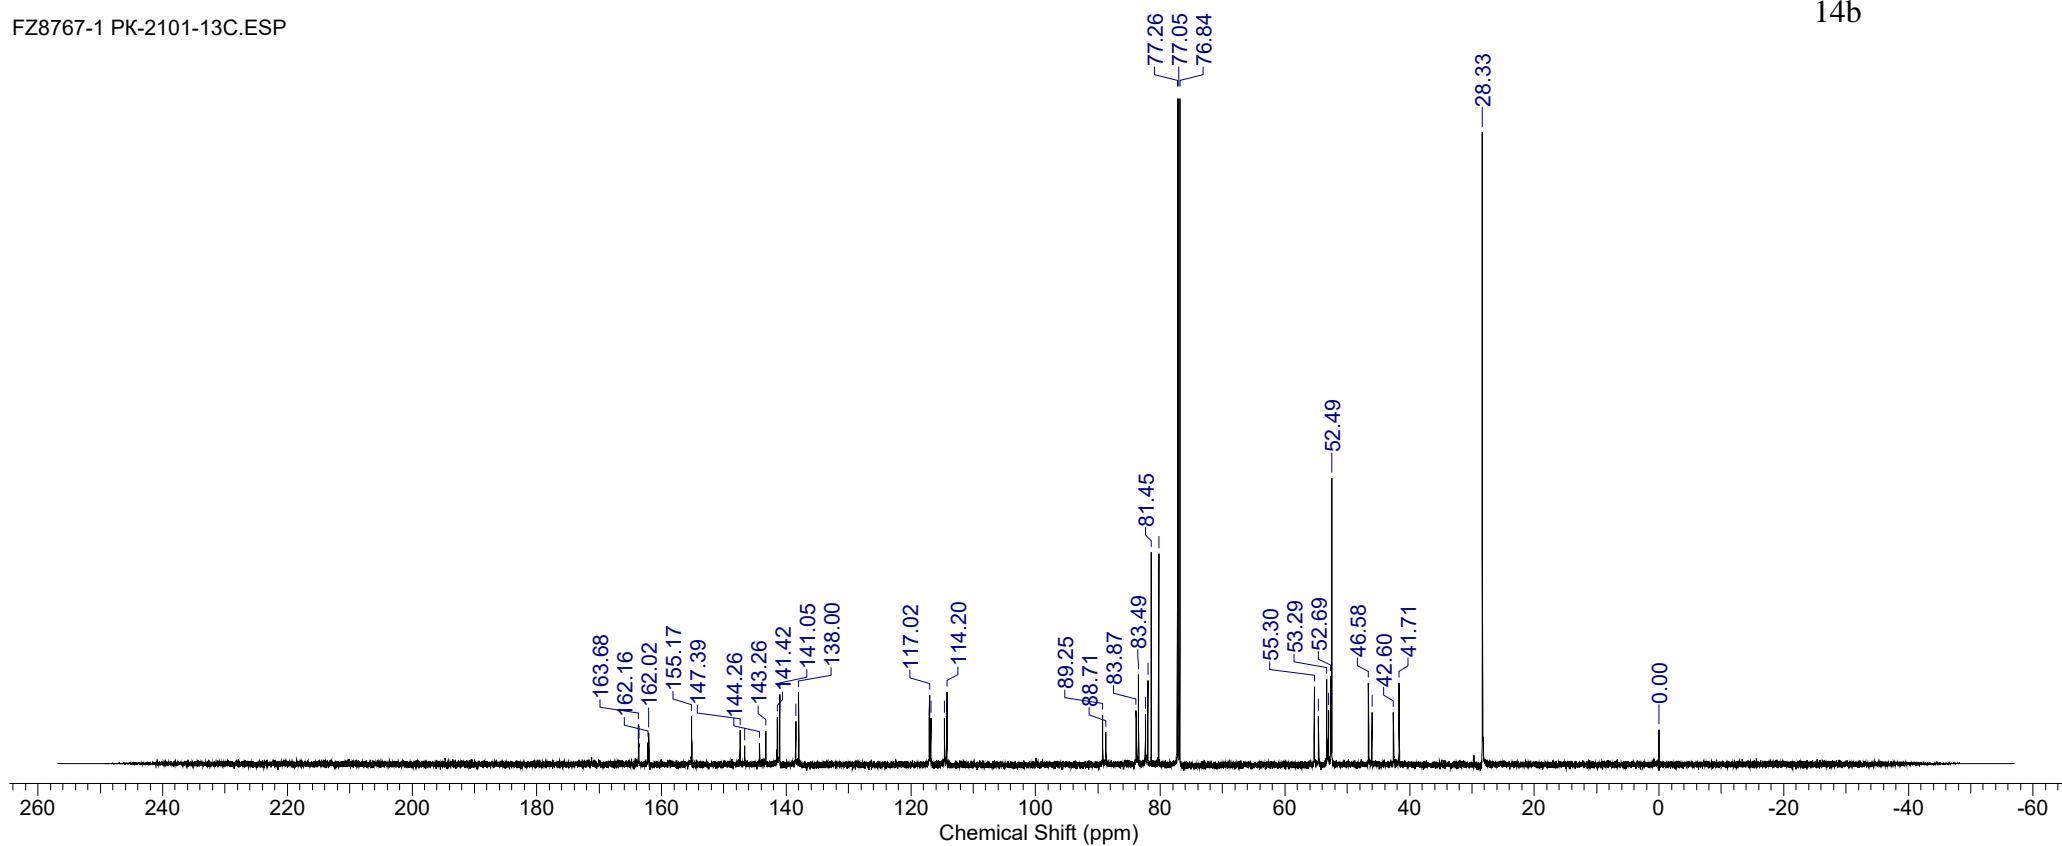

|                                                                              |                    |
|------------------------------------------------------------------------------|--------------------|
| <b>Formula</b> C <sub>27</sub> H <sub>30</sub> N <sub>2</sub> O <sub>6</sub> | <b>FW</b> 478.5369 |
|------------------------------------------------------------------------------|--------------------|

|                               |                      |                               |                                          |                             |                      |
|-------------------------------|----------------------|-------------------------------|------------------------------------------|-----------------------------|----------------------|
| <b>Acquisition Time (sec)</b> | 0.6921               | <b>Comment</b>                | single pulse decoupled gated NOE         | <b>Date</b>                 | 11 Jul 2020 01:04:25 |
| <b>Date Stamp</b>             | 11 Jul 2020 01:06:03 | <b>File Name</b>              | C:\USERS\J1a6a534\DOWNLOADS\FZ8767-1.JDF |                             |                      |
| <b>Frequency (MHz)</b>        | 150.91               | <b>Nucleus</b>                | 13C                                      | <b>Number of Transients</b> | 8000                 |
| <b>Original Points Count</b>  | 32768                | <b>Owner</b>                  | CKP                                      | <b>Points Count</b>         | 32768                |
| <b>Receiver Gain</b>          | 58.00                | <b>Solvent</b>                | CHLOROFORM-d                             | <b>Pulse Sequence</b>       | single pulse dec     |
| <b>Sweep Width (Hz)</b>       | 47348.49             | <b>Temperature (degree C)</b> | 28.600                                   | <b>Spectrum Offset (Hz)</b> | 15080.7979           |

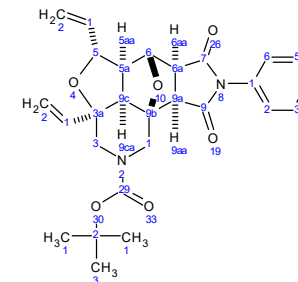

14b

FZ8767-1 PK-2101-13C.ESP

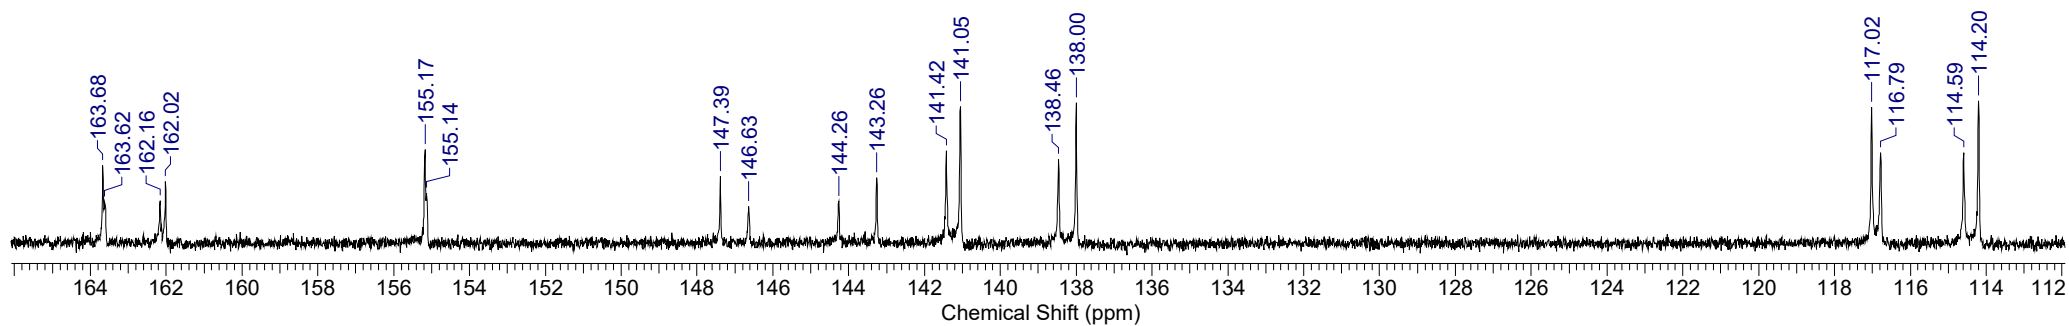



|                                                                              |                    |
|------------------------------------------------------------------------------|--------------------|
| <b>Formula</b> C <sub>27</sub> H <sub>30</sub> N <sub>2</sub> O <sub>6</sub> | <b>FW</b> 478.5369 |
|------------------------------------------------------------------------------|--------------------|

|                                        |                                                          |                                        |
|----------------------------------------|----------------------------------------------------------|----------------------------------------|
| <b>Acquisition Time (sec)</b> 0.6921   | <b>Comment</b> single pulse decoupled gated NOE          | <b>Date</b> 11 Jul 2020 01:04:25       |
| <b>Date Stamp</b> 11 Jul 2020 01:06:03 | <b>File Name</b> C:\USERS\1a6a534\DOWNLOADS\FZ8767-1.JDF |                                        |
| <b>Frequency (MHz)</b> 150.91          | <b>Nucleus</b> 13C                                       | <b>Number of Transients</b> 8000       |
| <b>Original Points Count</b> 32768     | <b>Owner</b> CKP                                         | <b>Points Count</b> 32768              |
| <b>Receiver Gain</b> 58.00             | <b>Solvent</b> CHLOROFORM-d                              | <b>Pulse Sequence</b> single pulse dec |
| <b>Sweep Width (Hz)</b> 47348.49       | <b>Temperature (degree C)</b> 28.600                     | <b>Spectrum Offset (Hz)</b> 15080.7979 |



14b

FZ8767-1 PK-2101-13C.ESP

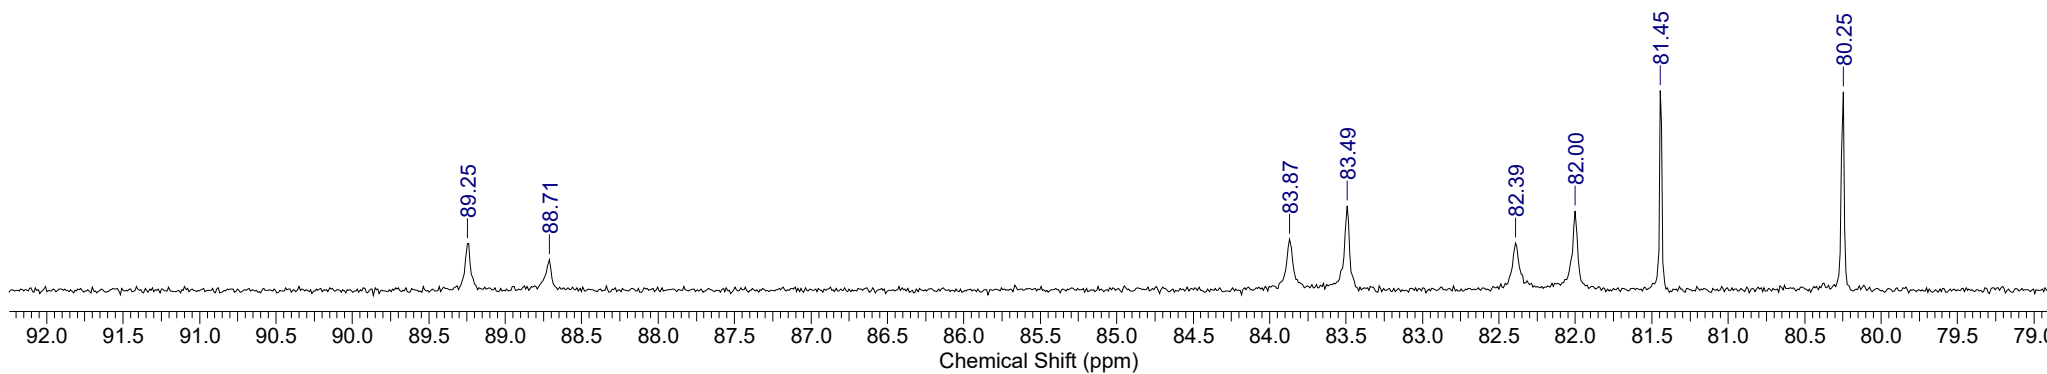

**Formula** C<sub>27</sub>H<sub>30</sub>N<sub>2</sub>O<sub>6</sub> **FW** 478.5369

|                               |                      |                               |                                          |                             |                      |
|-------------------------------|----------------------|-------------------------------|------------------------------------------|-----------------------------|----------------------|
| <b>Acquisition Time (sec)</b> | 0.6921               | <b>Comment</b>                | single pulse decoupled gated NOE         | <b>Date</b>                 | 11 Jul 2020 01:04:25 |
| <b>Date Stamp</b>             | 11 Jul 2020 01:06:03 | <b>File Name</b>              | C:\USERS\J1a6a534\DOWNLOADS\FZ8767-1.JDF |                             |                      |
| <b>Frequency (MHz)</b>        | 150.91               | <b>Nucleus</b>                | 13C                                      | <b>Number of Transients</b> | 8000                 |
| <b>Original Points Count</b>  | 32768                | <b>Owner</b>                  | CKP                                      | <b>Points Count</b>         | 32768                |
| <b>Receiver Gain</b>          | 58.00                | <b>Solvent</b>                | CHLOROFORM-d                             | <b>Pulse Sequence</b>       | single pulse dec     |
| <b>Sweep Width (Hz)</b>       | 47348.49             | <b>Temperature (degree C)</b> | 28.600                                   | <b>Spectrum Offset (Hz)</b> | 15080.7979           |



14b

FZ8767-1 PK-2101-13C.ESP

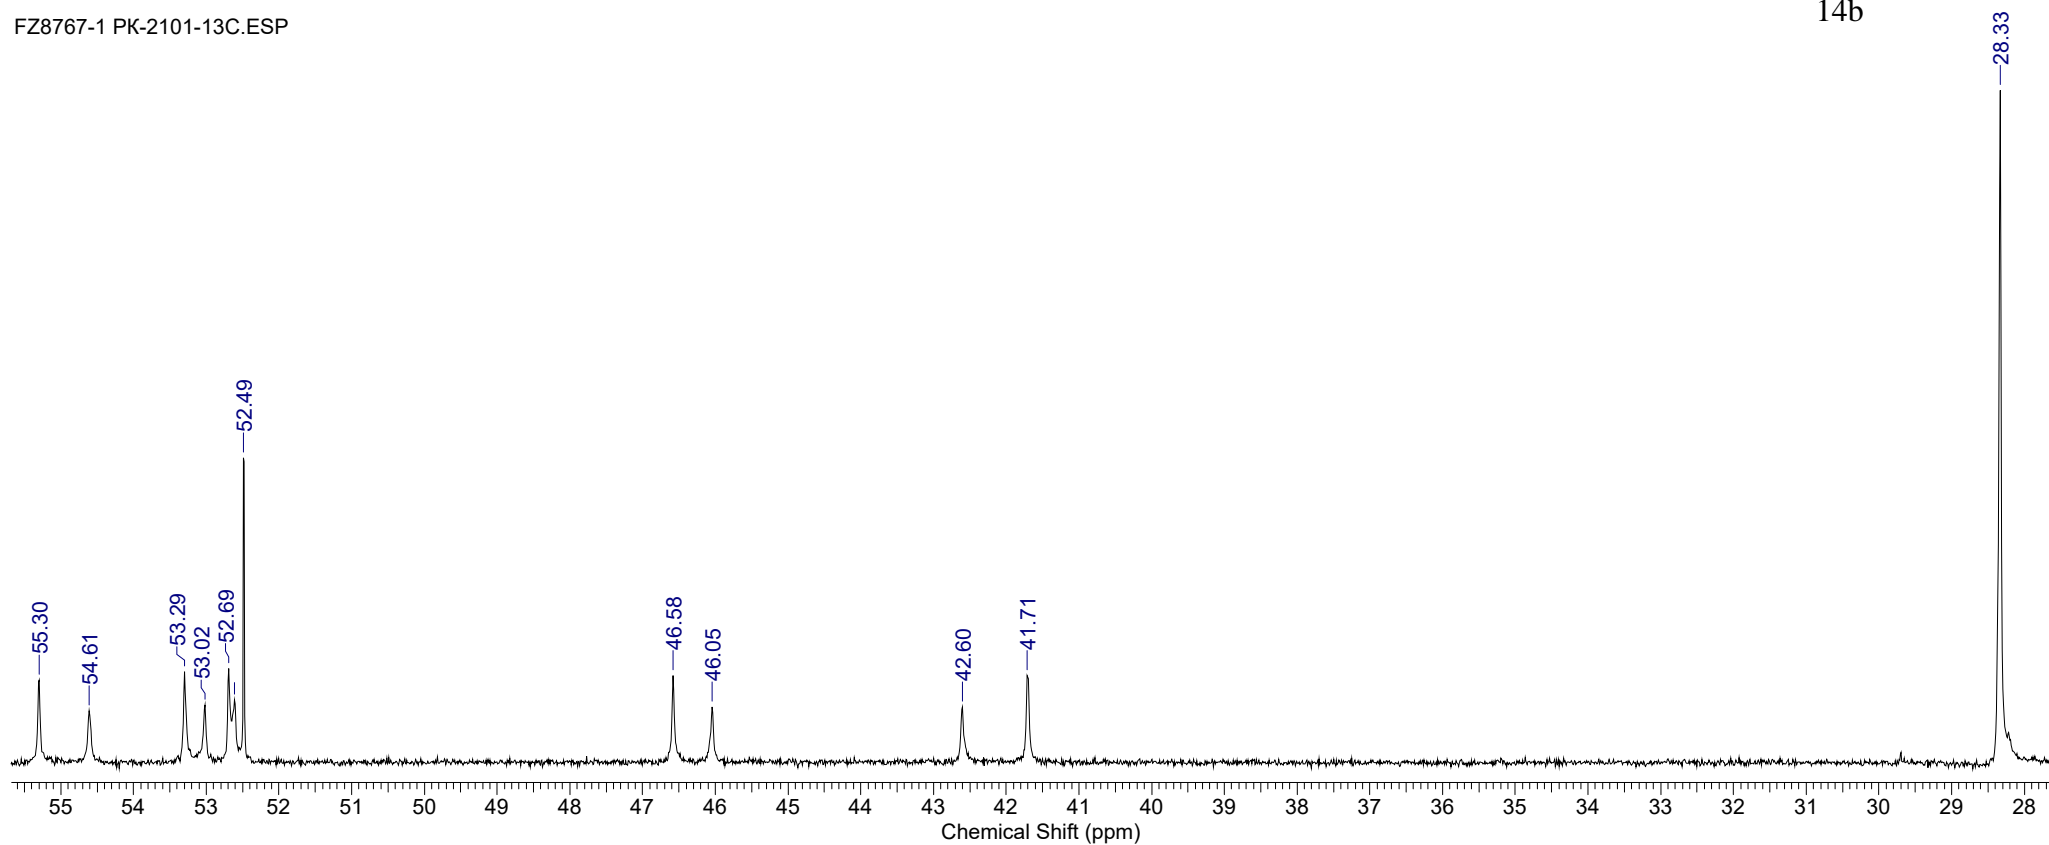

|                                                                              |                    |
|------------------------------------------------------------------------------|--------------------|
| <b>Formula</b> C <sub>24</sub> H <sub>24</sub> N <sub>2</sub> O <sub>6</sub> | <b>FW</b> 436.4572 |
|------------------------------------------------------------------------------|--------------------|

|                                                          |                                    |                                       |                                        |
|----------------------------------------------------------|------------------------------------|---------------------------------------|----------------------------------------|
| <b>Acquisition Time (sec)</b> 1.9818                     | <b>Comment</b> single_pulse        | <b>Date</b> 25 Aug 2020 13:47:02      | <b>Date Stamp</b> 25 Aug 2020 13:48:17 |
| <b>File Name</b> C:\USERS\Лабa534\DOWNLOADS\FZ9037-1.JDF | <b>Frequency (MHz)</b> 600.17      | <b>Nucleus</b> 1H                     | <b>Number of Transients</b> 8          |
| <b>Origin</b> ECA 600                                    | <b>Original Points Count</b> 32768 | <b>Owner</b> CKP                      | <b>Pulse Sequence</b> single_pulse.ex2 |
| <b>Receiver Gain</b> 42.00                               | <b>Solvent</b> CHLOROFORM-d        | <b>Spectrum Offset (Hz)</b> 5410.6274 | <b>Sweep Width (Hz)</b> 16534.39       |

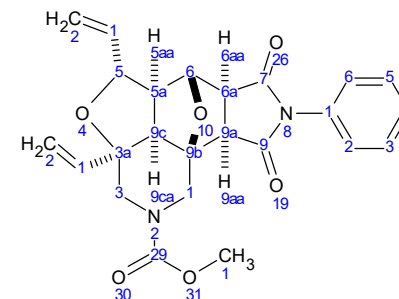

14c

FZ9037-1.JDF

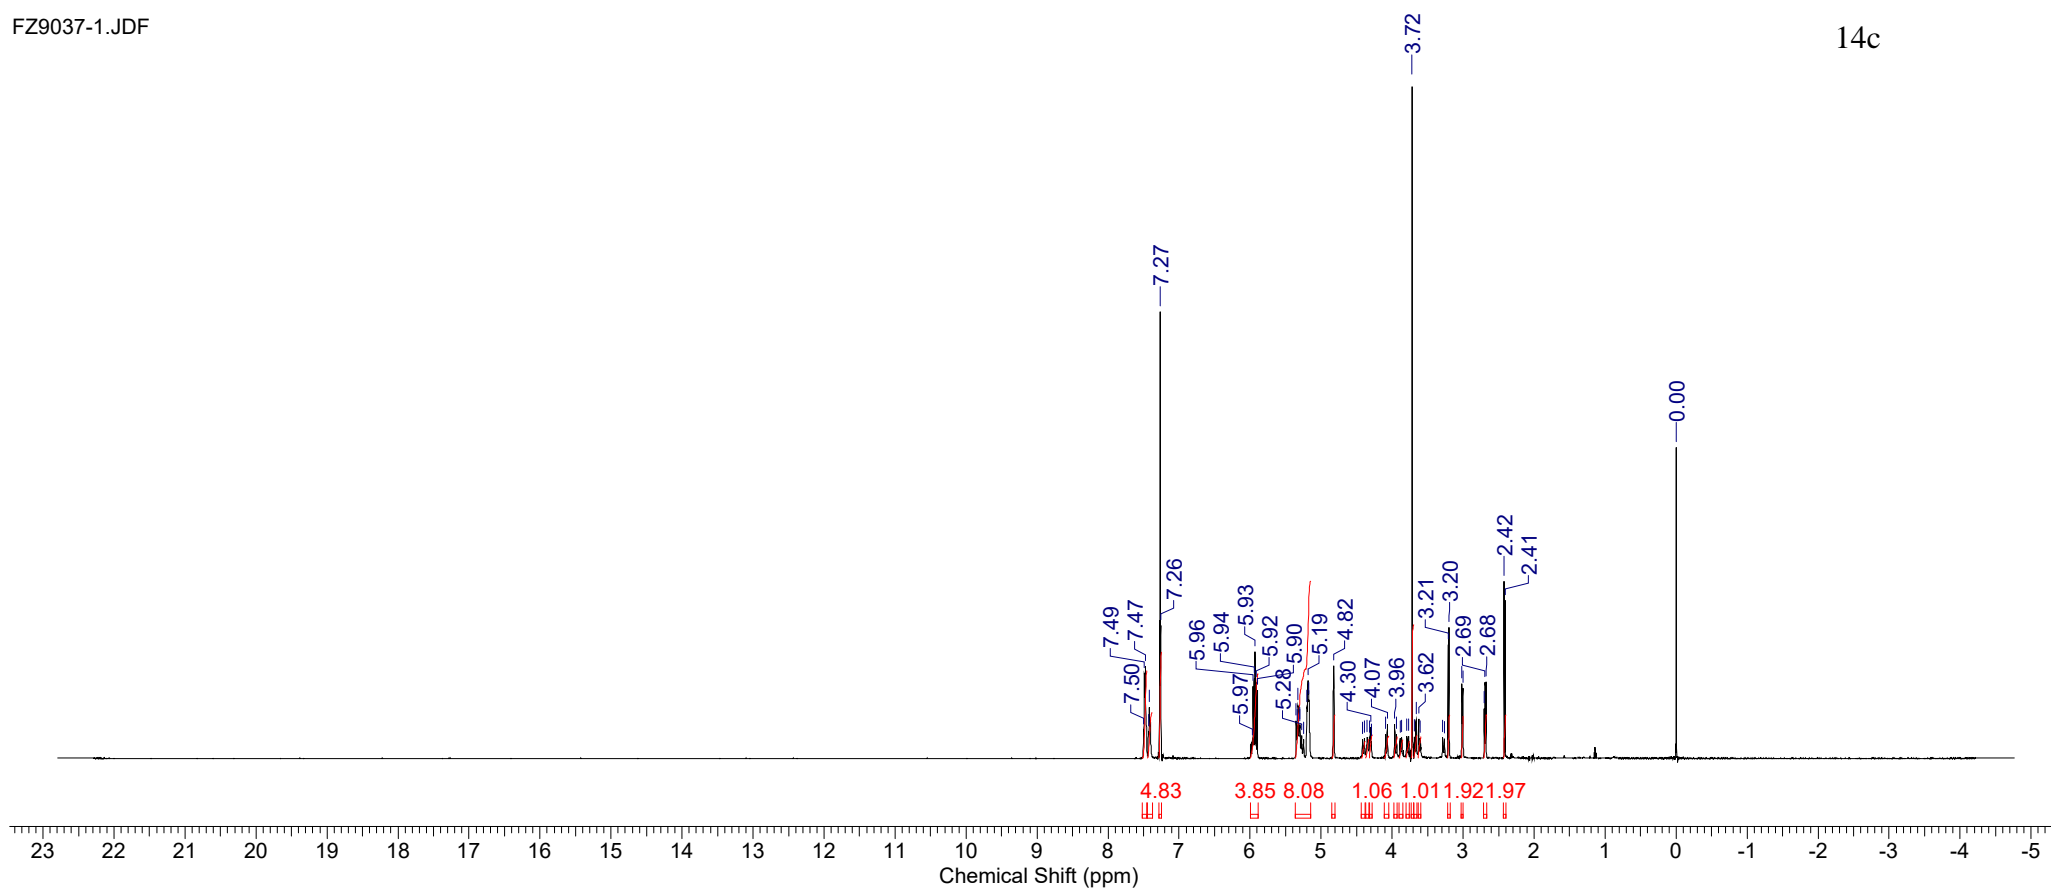

|                                                                              |                    |
|------------------------------------------------------------------------------|--------------------|
| <b>Formula</b> C <sub>24</sub> H <sub>24</sub> N <sub>2</sub> O <sub>6</sub> | <b>FW</b> 436.4572 |
|------------------------------------------------------------------------------|--------------------|

|                                                          |                                    |                                       |                                        |
|----------------------------------------------------------|------------------------------------|---------------------------------------|----------------------------------------|
| <b>Acquisition Time (sec)</b> 1.9818                     | <b>Comment</b> single_pulse        | <b>Date</b> 25 Aug 2020 13:47:02      | <b>Date Stamp</b> 25 Aug 2020 13:48:17 |
| <b>File Name</b> C:\USERS\Лабa534\DOWNLOADS\FZ9037-1.JDF | <b>Frequency (MHz)</b> 600.17      | <b>Nucleus</b> 1H                     | <b>Number of Transients</b> 8          |
| <b>Origin</b> ECA 600                                    | <b>Original Points Count</b> 32768 | <b>Owner</b> CKP                      | <b>Pulse Sequence</b> single_pulse.ex2 |
| <b>Receiver Gain</b> 42.00                               | <b>Solvent</b> CHLOROFORM-d        | <b>Spectrum Offset (Hz)</b> 5410.6274 | <b>Sweep Width (Hz)</b> 16534.39       |

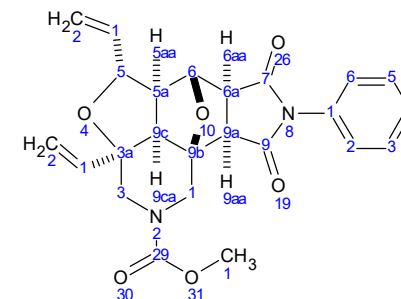

14c

FZ9037-1.JDF

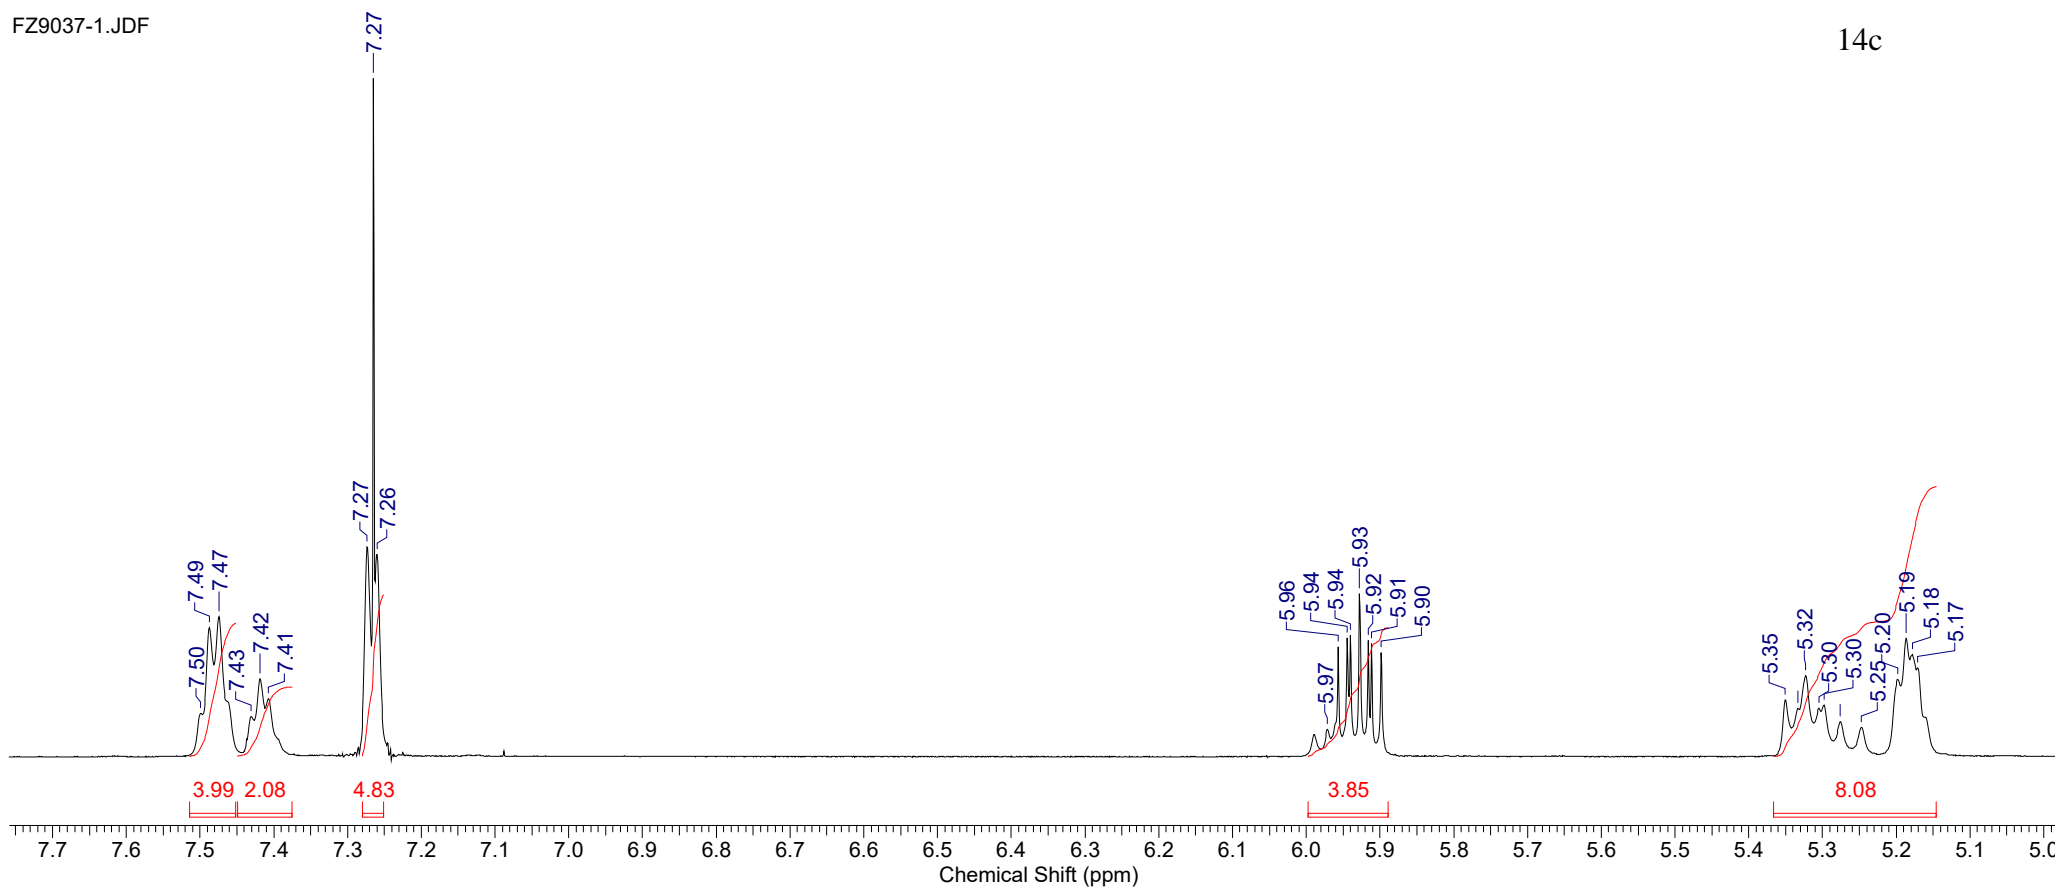

|                                                                              |                    |
|------------------------------------------------------------------------------|--------------------|
| <b>Formula</b> C <sub>24</sub> H <sub>24</sub> N <sub>2</sub> O <sub>6</sub> | <b>FW</b> 436.4572 |
|------------------------------------------------------------------------------|--------------------|

|                                                          |                                    |                                       |                                        |
|----------------------------------------------------------|------------------------------------|---------------------------------------|----------------------------------------|
| <b>Acquisition Time (sec)</b> 1.9818                     | <b>Comment</b> single_pulse        | <b>Date</b> 25 Aug 2020 13:47:02      | <b>Date Stamp</b> 25 Aug 2020 13:48:17 |
| <b>File Name</b> C:\USERS\Лабa534\DOWNLOADS\FZ9037-1.JDF | <b>Frequency (MHz)</b> 600.17      | <b>Nucleus</b> 1H                     | <b>Number of Transients</b> 8          |
| <b>Origin</b> ECA 600                                    | <b>Original Points Count</b> 32768 | <b>Owner</b> CKP                      | <b>Pulse Sequence</b> single_pulse.ex2 |
| <b>Receiver Gain</b> 42.00                               | <b>Solvent</b> CHLOROFORM-d        | <b>Spectrum Offset (Hz)</b> 5410.6274 | <b>Sweep Width (Hz)</b> 16534.39       |

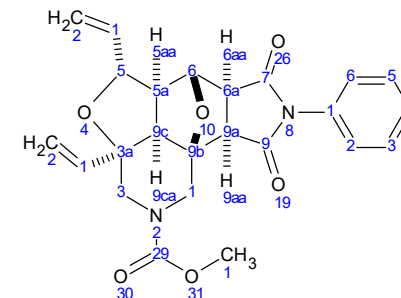

FZ9037-1.JDF

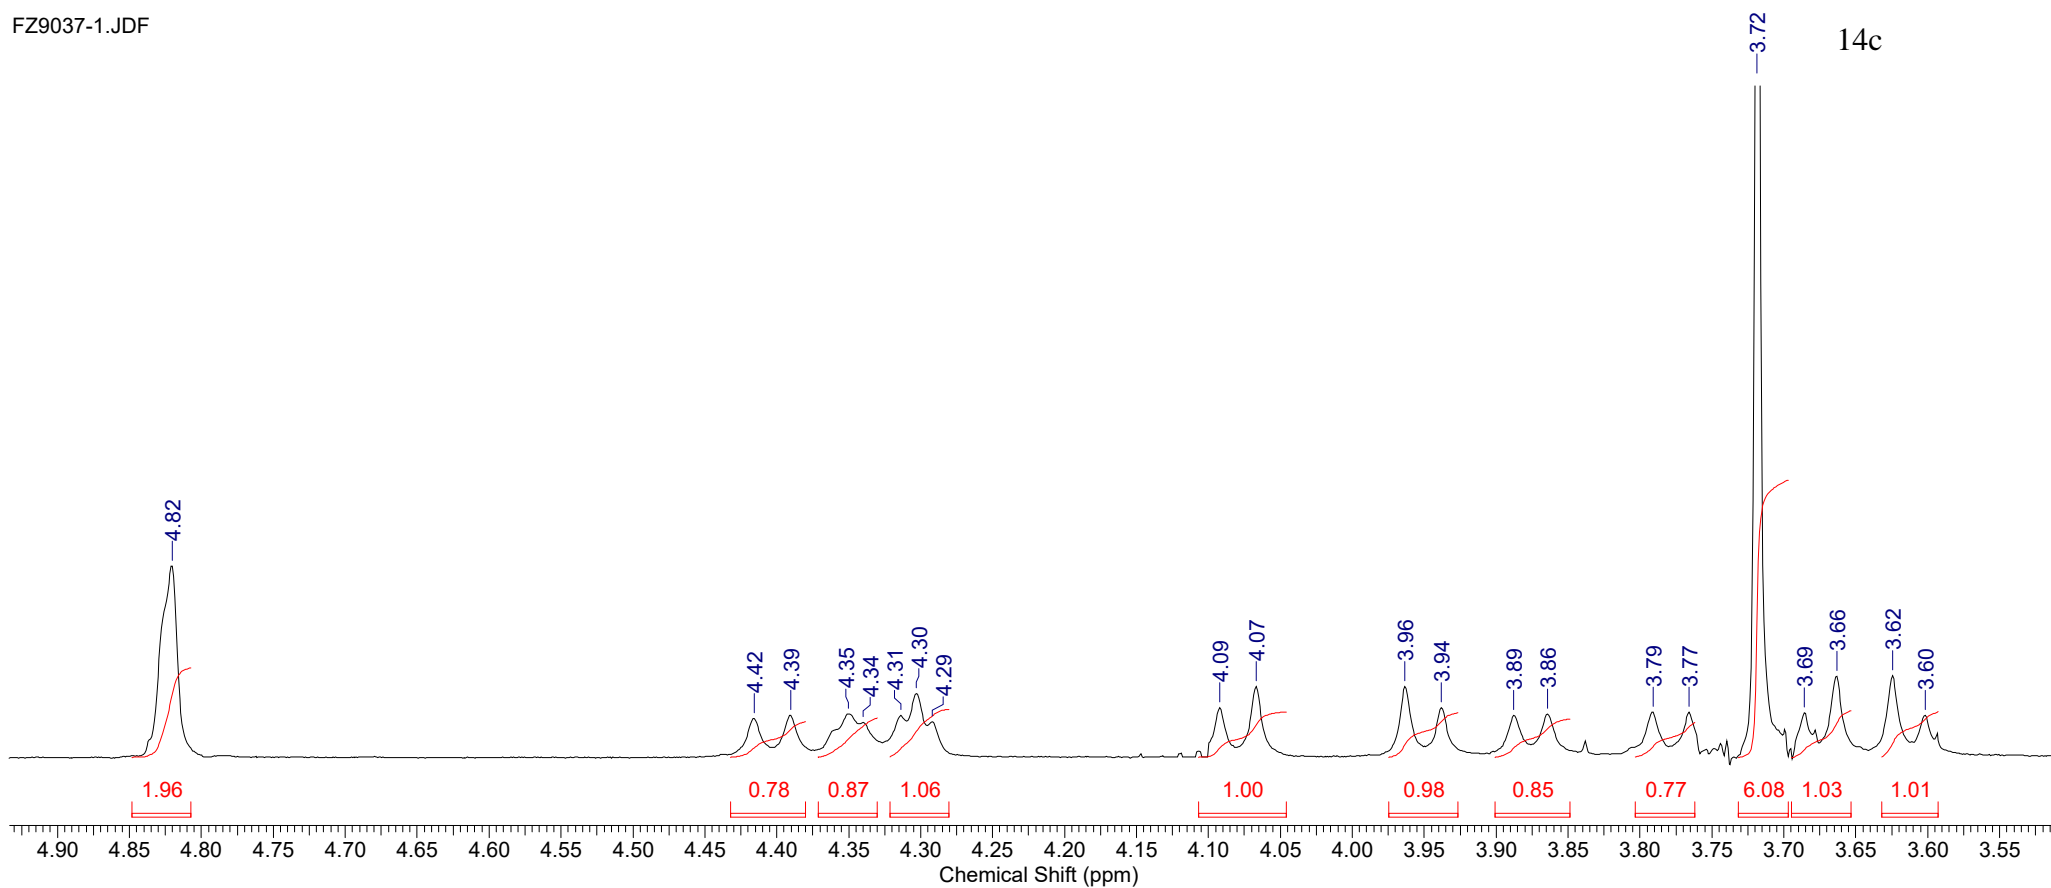

|                                                                              |                    |
|------------------------------------------------------------------------------|--------------------|
| <b>Formula</b> C <sub>24</sub> H <sub>24</sub> N <sub>2</sub> O <sub>6</sub> | <b>FW</b> 436.4572 |
|------------------------------------------------------------------------------|--------------------|

|                                                          |                                    |                                       |                                        |
|----------------------------------------------------------|------------------------------------|---------------------------------------|----------------------------------------|
| <b>Acquisition Time (sec)</b> 1.9818                     | <b>Comment</b> single_pulse        | <b>Date</b> 25 Aug 2020 13:47:02      | <b>Date Stamp</b> 25 Aug 2020 13:48:17 |
| <b>File Name</b> C:\USERS\Лабa534\DOWNLOADS\FZ9037-1.JDF | <b>Frequency (MHz)</b> 600.17      | <b>Nucleus</b> 1H                     | <b>Number of Transients</b> 8          |
| <b>Origin</b> ECA 600                                    | <b>Original Points Count</b> 32768 | <b>Owner</b> CKP                      | <b>Pulse Sequence</b> single_pulse.ex2 |
| <b>Receiver Gain</b> 42.00                               | <b>Solvent</b> CHLOROFORM-d        | <b>Spectrum Offset (Hz)</b> 5410.6274 | <b>Sweep Width (Hz)</b> 16534.39       |



14c

FZ9037-1.JDF

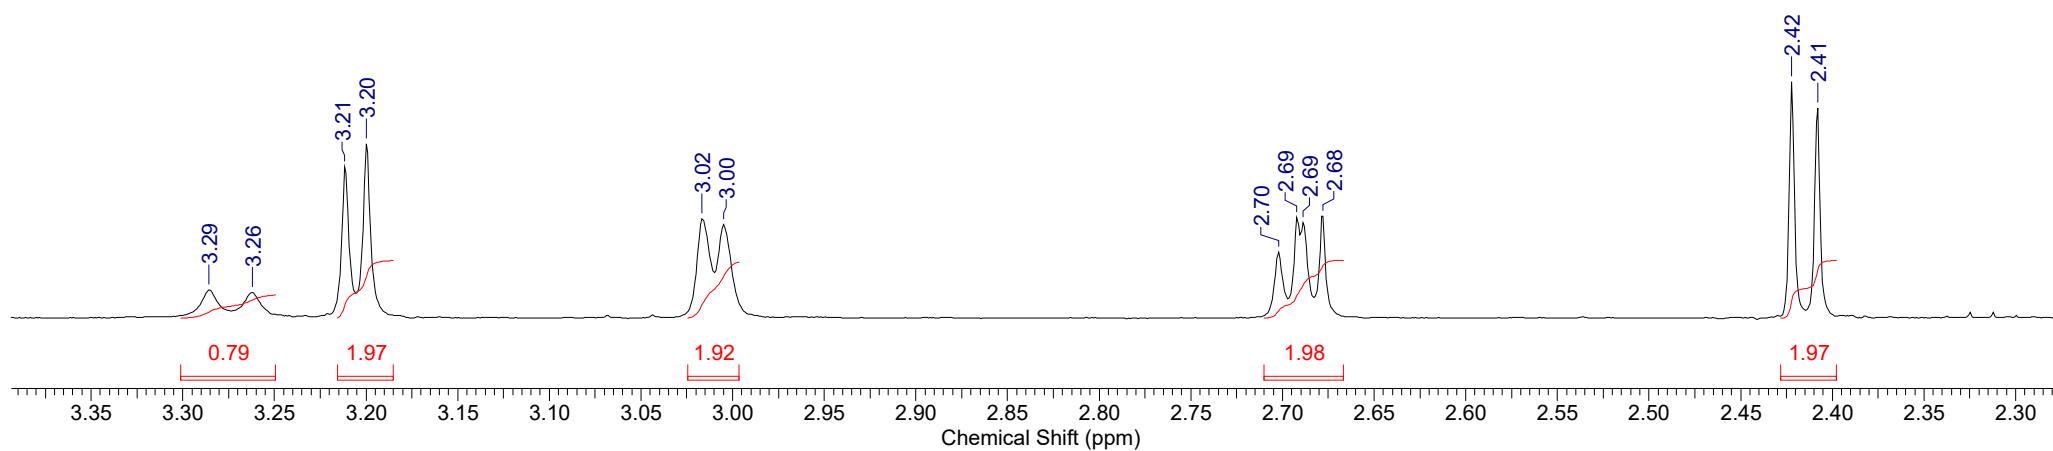

|                                                                              |                    |
|------------------------------------------------------------------------------|--------------------|
| <b>Formula</b> C <sub>24</sub> H <sub>24</sub> N <sub>2</sub> O <sub>6</sub> | <b>FW</b> 436.4572 |
|------------------------------------------------------------------------------|--------------------|

|                                        |                                                           |                                        |
|----------------------------------------|-----------------------------------------------------------|----------------------------------------|
| <b>Acquisition Time (sec)</b> 0.6921   | <b>Comment</b> single pulse decoupled gated NOE           | <b>Date</b> 26 Aug 2020 01:02:05       |
| <b>Date Stamp</b> 26 Aug 2020 01:03:21 | <b>File Name</b> C:\USERS\l1a6a534\DOWNLOADS\FZ9037-2.JDF |                                        |
| <b>Frequency (MHz)</b> 150.91          | <b>Nucleus</b> 13C                                        | <b>Number of Transients</b> 20000      |
| <b>Original Points Count</b> 32768     | <b>Owner</b> CKP                                          | <b>Points Count</b> 32768              |
| <b>Receiver Gain</b> 58.00             | <b>Solvent</b> CHLOROFORM-d                               | <b>Pulse Sequence</b> single pulse dec |
| <b>Sweep Width (Hz)</b> 47348.49       |                                                           | <b>Spectrum Offset (Hz)</b> 15079.3525 |

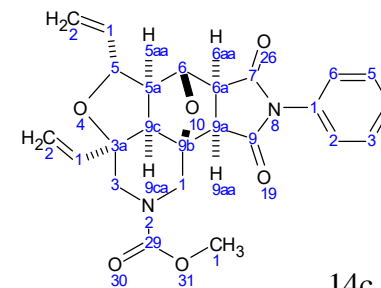

FZ9037-2.JDF

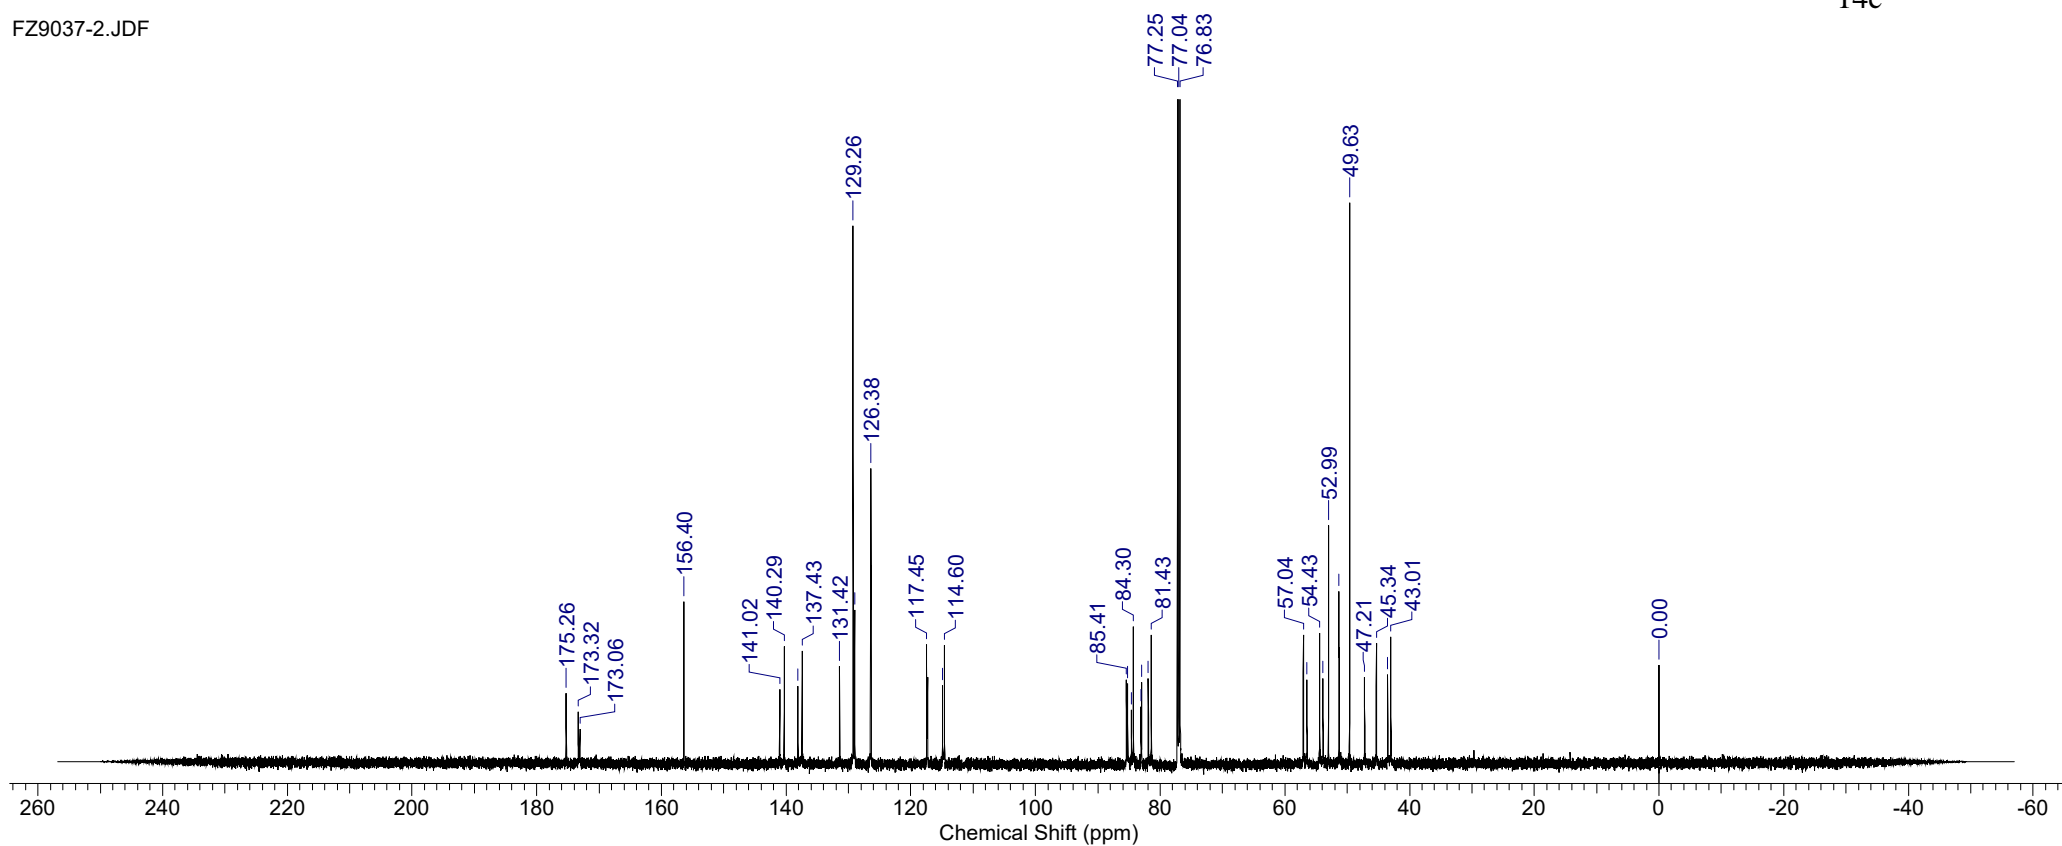

|                                                                              |                    |
|------------------------------------------------------------------------------|--------------------|
| <b>Formula</b> C <sub>24</sub> H <sub>24</sub> N <sub>2</sub> O <sub>6</sub> | <b>FW</b> 436.4572 |
|------------------------------------------------------------------------------|--------------------|

|                                        |                                                           |                                        |
|----------------------------------------|-----------------------------------------------------------|----------------------------------------|
| <b>Acquisition Time (sec)</b> 0.6921   | <b>Comment</b> single pulse decoupled gated NOE           | <b>Date</b> 26 Aug 2020 01:02:05       |
| <b>Date Stamp</b> 26 Aug 2020 01:03:21 | <b>File Name</b> C:\USERS\l1a6a534\DOWNLOADS\FZ9037-2.JDF |                                        |
| <b>Frequency (MHz)</b> 150.91          | <b>Nucleus</b> 13C                                        | <b>Number of Transients</b> 20000      |
| <b>Original Points Count</b> 32768     | <b>Owner</b> CKP                                          | <b>Points Count</b> 32768              |
| <b>Receiver Gain</b> 58.00             | <b>Solvent</b> CHLOROFORM-d                               | <b>Pulse Sequence</b> single_pulse_dec |
| <b>Sweep Width (Hz)</b> 47348.49       |                                                           | <b>Spectrum Offset (Hz)</b> 15079.3525 |

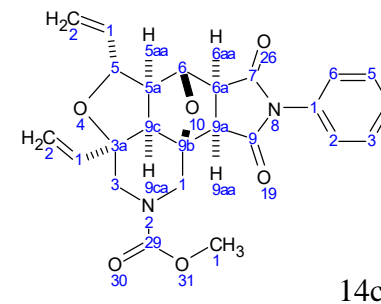

FZ9037-2.JDF

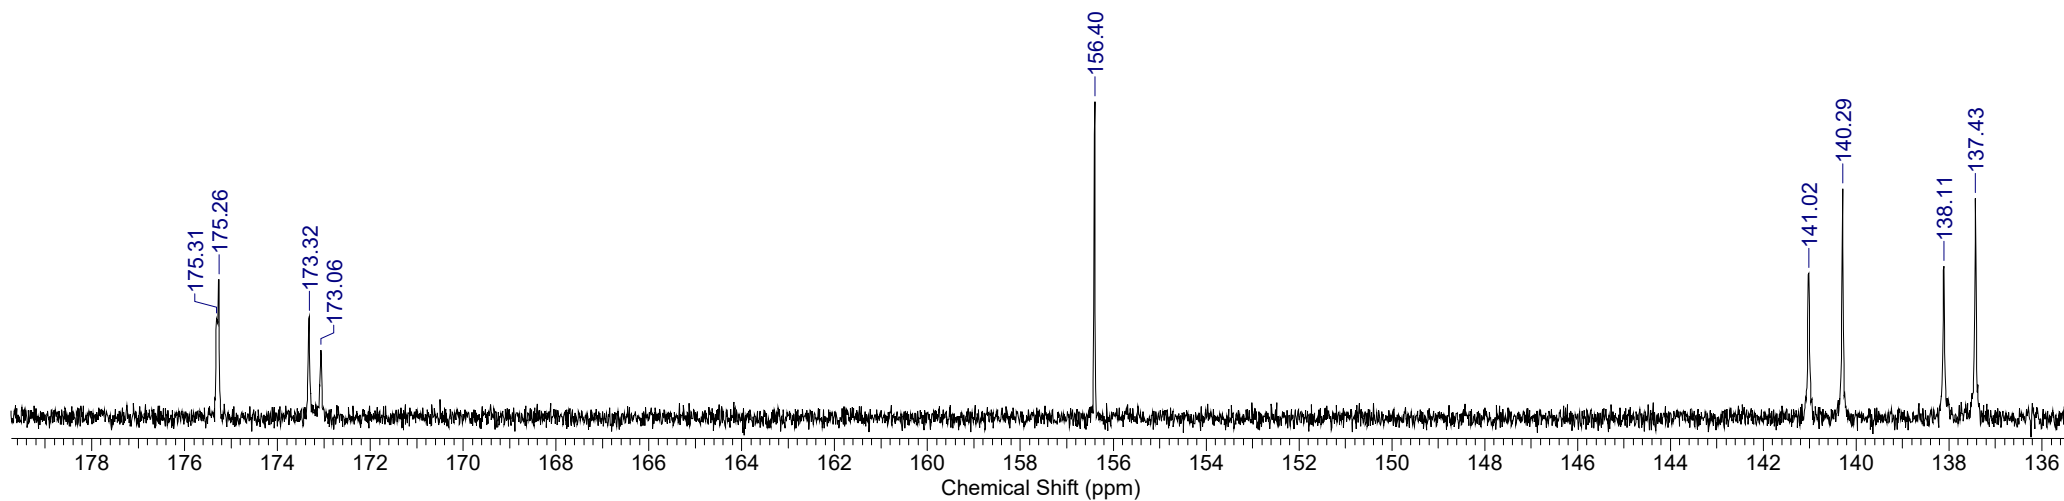



|                                                                              |                    |
|------------------------------------------------------------------------------|--------------------|
| <b>Formula</b> C <sub>24</sub> H <sub>24</sub> N <sub>2</sub> O <sub>6</sub> | <b>FW</b> 436.4572 |
|------------------------------------------------------------------------------|--------------------|

|                                        |                                                           |                                        |
|----------------------------------------|-----------------------------------------------------------|----------------------------------------|
| <b>Acquisition Time (sec)</b> 0.6921   | <b>Comment</b> single pulse decoupled gated NOE           | <b>Date</b> 26 Aug 2020 01:02:05       |
| <b>Date Stamp</b> 26 Aug 2020 01:03:21 | <b>File Name</b> C:\USERS\l1a6a534\DOWNLOADS\FZ9037-2.JDF |                                        |
| <b>Frequency (MHz)</b> 150.91          | <b>Nucleus</b> 13C                                        | <b>Number of Transients</b> 20000      |
| <b>Original Points Count</b> 32768     | <b>Owner</b> CKP                                          | <b>Points Count</b> 32768              |
| <b>Receiver Gain</b> 58.00             | <b>Solvent</b> CHLOROFORM-d                               | <b>Pulse Sequence</b> single_pulse_dec |
| <b>Sweep Width (Hz)</b> 47348.49       |                                                           | <b>Spectrum Offset (Hz)</b> 15079.3525 |

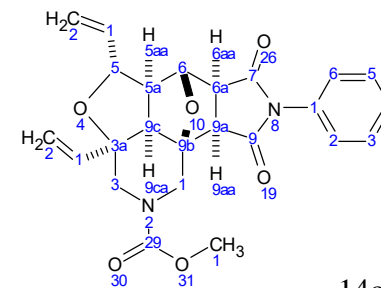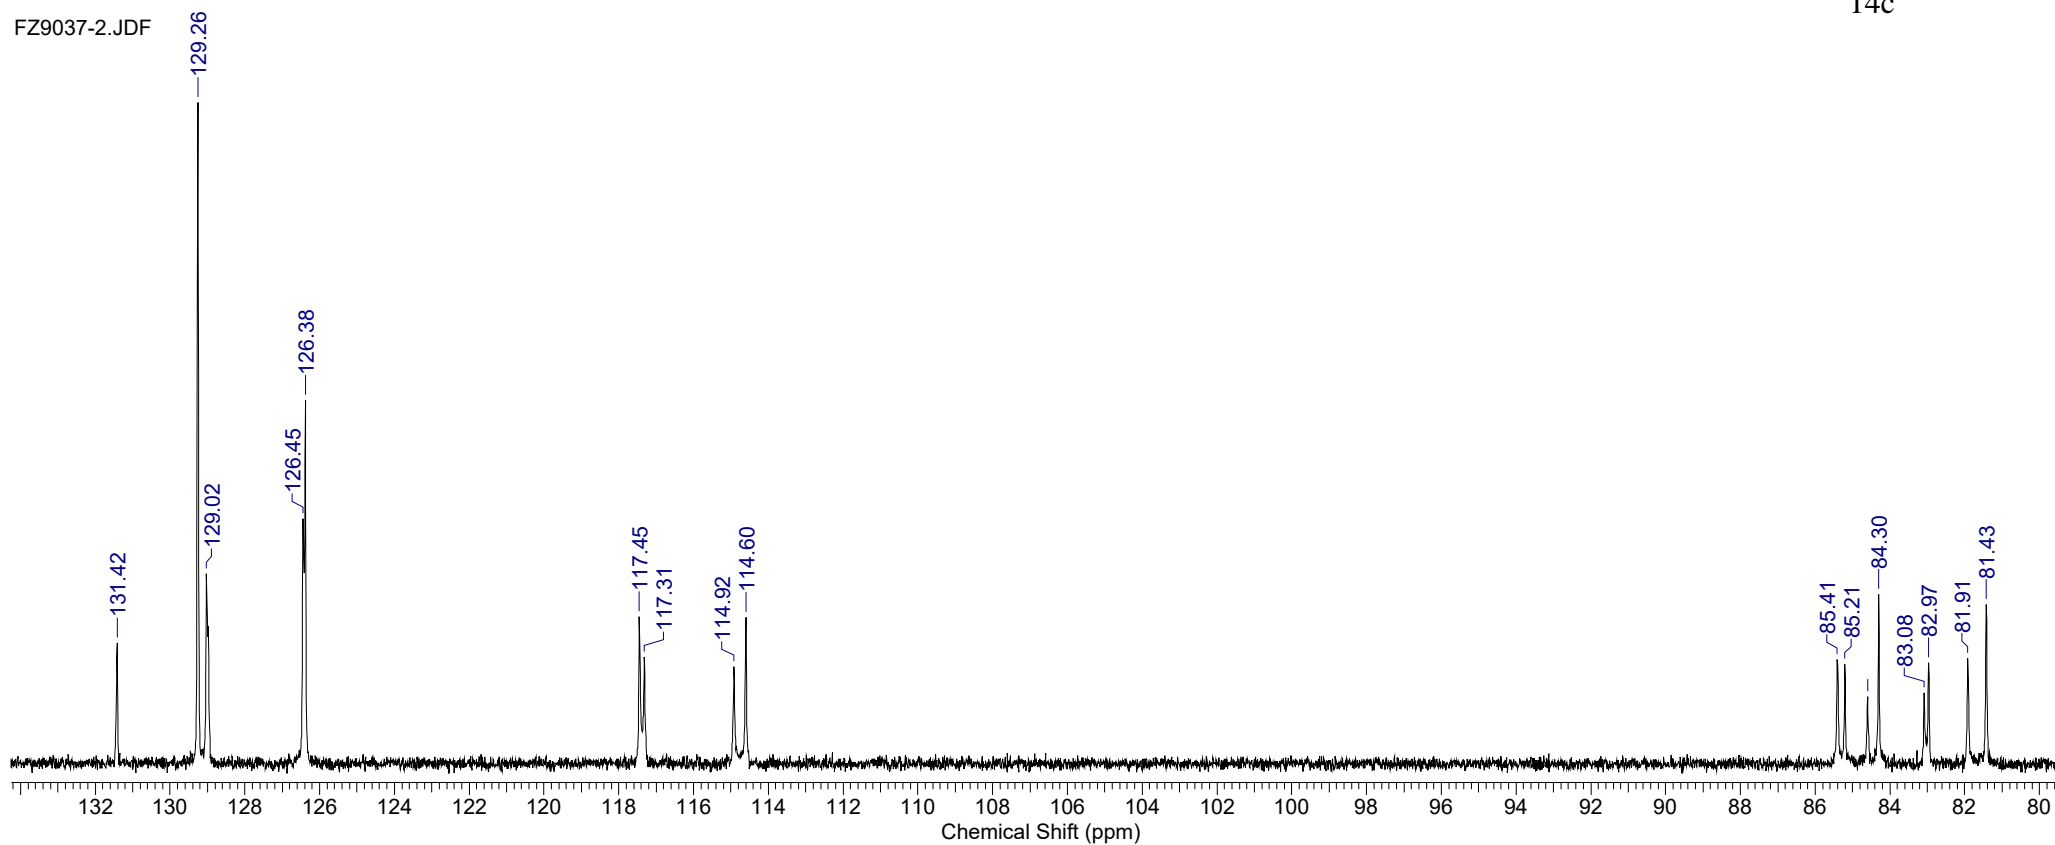

|                                                                              |                    |
|------------------------------------------------------------------------------|--------------------|
| <b>Formula</b> C <sub>24</sub> H <sub>24</sub> N <sub>2</sub> O <sub>6</sub> | <b>FW</b> 436.4572 |
|------------------------------------------------------------------------------|--------------------|

|                                        |                                                           |                                        |
|----------------------------------------|-----------------------------------------------------------|----------------------------------------|
| <b>Acquisition Time (sec)</b> 0.6921   | <b>Comment</b> single pulse decoupled gated NOE           | <b>Date</b> 26 Aug 2020 01:02:05       |
| <b>Date Stamp</b> 26 Aug 2020 01:03:21 | <b>File Name</b> C:\USERS\l1a6a534\DOWNLOADS\FZ9037-2.JDF |                                        |
| <b>Frequency (MHz)</b> 150.91          | <b>Nucleus</b> 13C                                        | <b>Number of Transients</b> 20000      |
| <b>Original Points Count</b> 32768     | <b>Owner</b> CKP                                          | <b>Points Count</b> 32768              |
| <b>Receiver Gain</b> 58.00             | <b>Solvent</b> CHLOROFORM-d                               | <b>Pulse Sequence</b> single_pulse_dec |
| <b>Sweep Width (Hz)</b> 47348.49       |                                                           | <b>Spectrum Offset (Hz)</b> 15079.3525 |

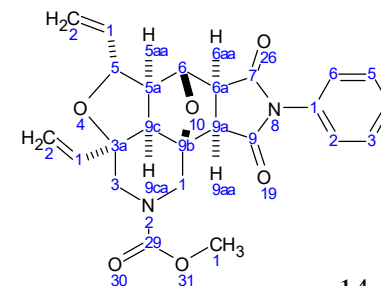

14c

FZ9037-2.JDF

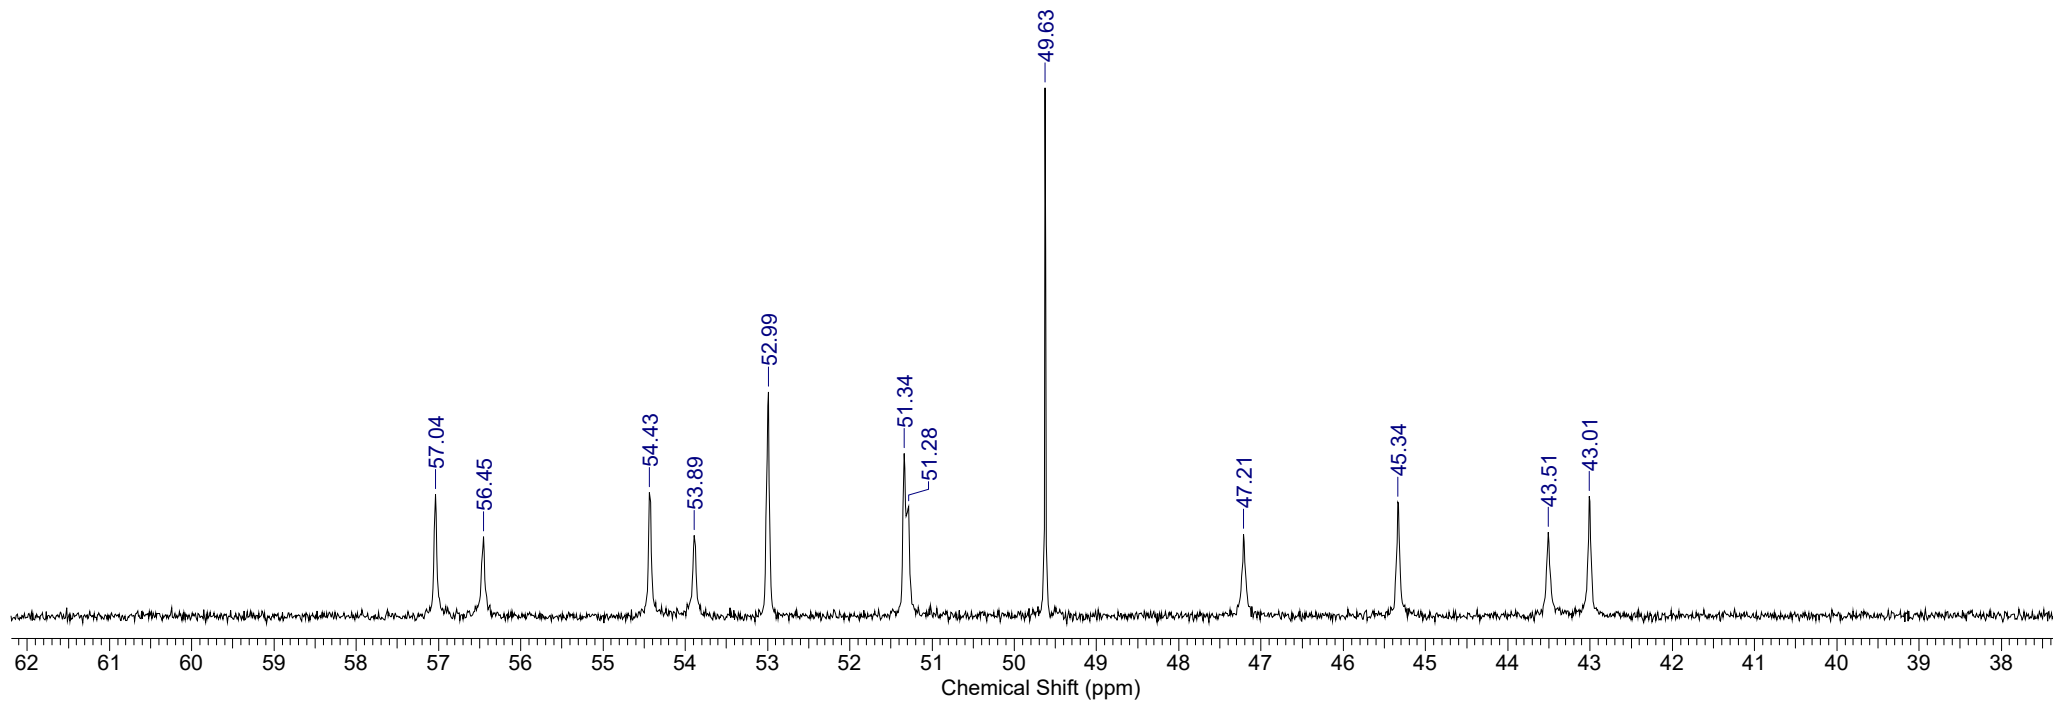

|                                                                                             |                    |
|---------------------------------------------------------------------------------------------|--------------------|
| <b>Formula</b> C <sub>24</sub> H <sub>21</sub> F <sub>3</sub> N <sub>3</sub> O <sub>5</sub> | <b>FW</b> 474.4291 |
|---------------------------------------------------------------------------------------------|--------------------|

|                                        |                                                          |                                       |                               |
|----------------------------------------|----------------------------------------------------------|---------------------------------------|-------------------------------|
| <b>Acquisition Time (sec)</b> 0.9909   | <b>Comment</b> single pulse                              | <b>Date</b> 07 Feb 2020 08:41:28      | <b>Frequency (MHz)</b> 600.17 |
| <b>Date Stamp</b> 19 Feb 2020 10:27:08 | <b>File Name</b> C:\USERS\I\ab534\DOWNLOADS\FZ8490-1.JDF | <b>Original Points Count</b> 16384    | <b>Owner</b> CKP              |
| <b>Nucleus</b> 1H                      | <b>Number of Transients</b> 8                            | <b>Origin</b> ECA 600                 | <b>Receiver Gain</b> 36.00    |
| <b>Points Count</b> 16384              | <b>Pulse Sequence</b> single_pulse.ex2                   | <b>Spectrum Offset (Hz)</b> 5412.0542 | <b>Solvent</b> CHLOROFORM-d   |
| <b>Sweep Width (Hz)</b> 16534.39       | <b>Temperature (degree C)</b> 22.900                     |                                       |                               |

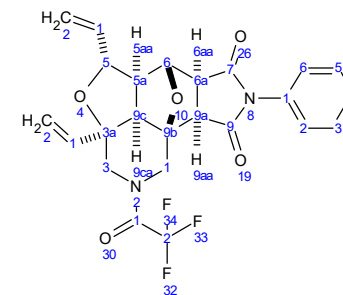

FZ8490-1.JDF

14d

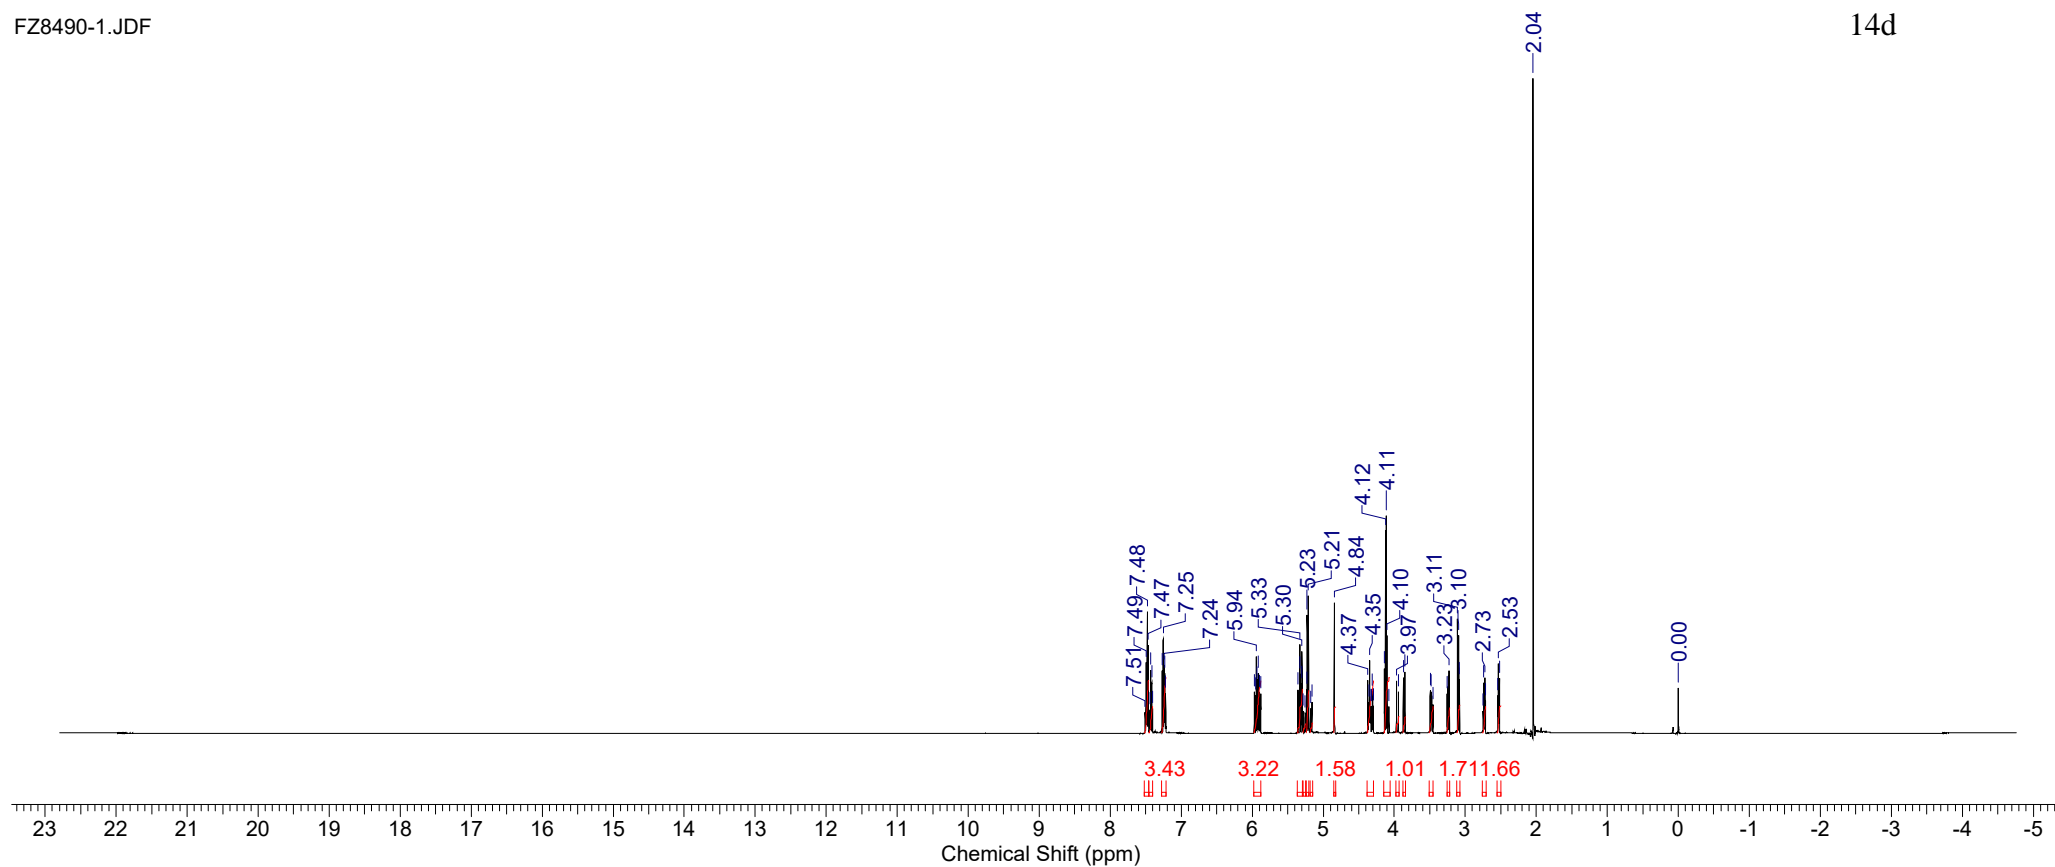

|                                                                                             |                    |
|---------------------------------------------------------------------------------------------|--------------------|
| <b>Formula</b> C <sub>24</sub> H <sub>21</sub> F <sub>3</sub> N <sub>3</sub> O <sub>5</sub> | <b>FW</b> 474.4291 |
|---------------------------------------------------------------------------------------------|--------------------|

|                                        |                                        |                                                          |                                    |
|----------------------------------------|----------------------------------------|----------------------------------------------------------|------------------------------------|
| <b>Acquisition Time (sec)</b> 0.9909   | <b>Comment</b> single pulse            | <b>Date</b> 07 Feb 2020 08:41:28                         |                                    |
| <b>Date Stamp</b> 19 Feb 2020 10:27:08 |                                        | <b>File Name</b> C:\USERS\Лабa534\DOWNLOADS\FZ8490-1.JDF | <b>Frequency (MHz)</b> 600.17      |
| <b>Nucleus</b> 1H                      | <b>Number of Transients</b> 8          | <b>Origin</b> ECA 600                                    | <b>Original Points Count</b> 16384 |
| <b>Points Count</b> 16384              | <b>Pulse Sequence</b> single_pulse.ex2 | <b>Receiver Gain</b> 36.00                               | <b>Owner</b> CKP                   |
| <b>Spectrum Offset (Hz)</b> 5412.0542  | <b>Sweep Width (Hz)</b> 16534.39       | <b>Temperature (degree C)</b> 22.900                     | <b>Solvent</b> CHLOROFORM-d        |



FZ8490-1.JDF

14d

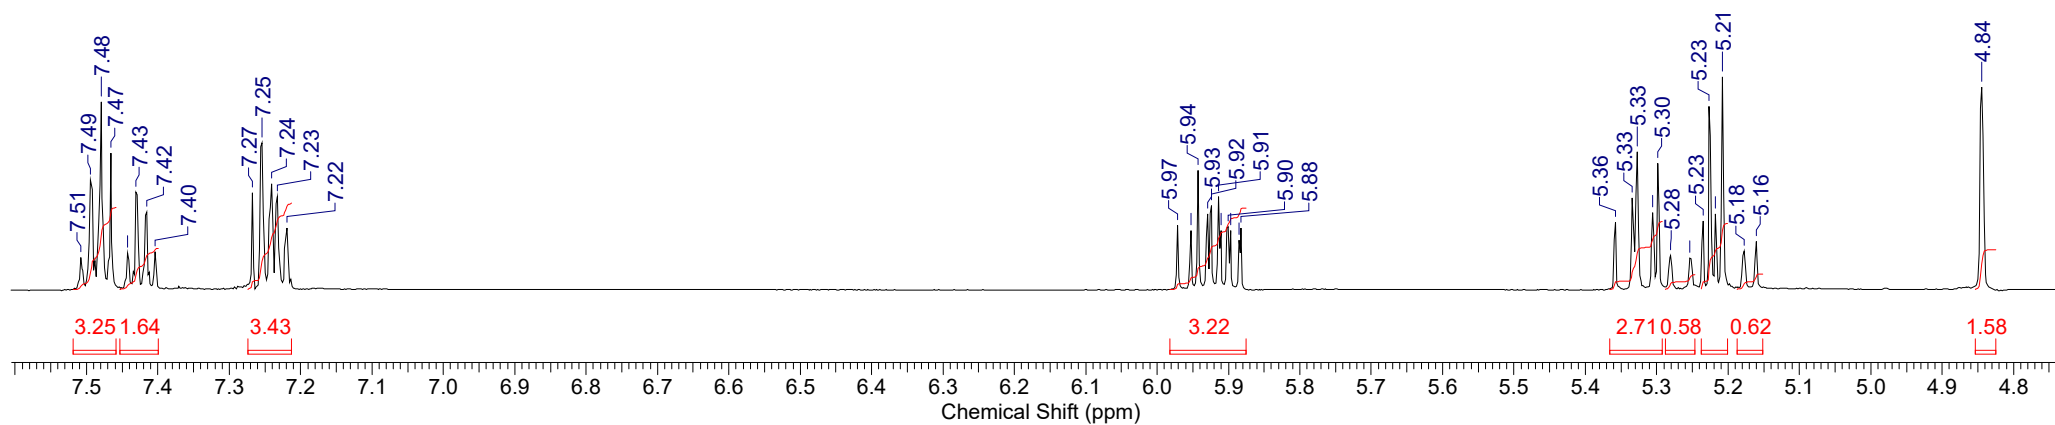

|                                                                                             |                    |
|---------------------------------------------------------------------------------------------|--------------------|
| <b>Formula</b> C <sub>24</sub> H <sub>21</sub> F <sub>3</sub> N <sub>3</sub> O <sub>5</sub> | <b>FW</b> 474.4291 |
|---------------------------------------------------------------------------------------------|--------------------|

|                                        |                                                          |                                      |                               |
|----------------------------------------|----------------------------------------------------------|--------------------------------------|-------------------------------|
| <b>Acquisition Time (sec)</b> 0.9909   | <b>Comment</b> single pulse                              | <b>Date</b> 07 Feb 2020 08:41:28     | <b>Frequency (MHz)</b> 600.17 |
| <b>Date Stamp</b> 19 Feb 2020 10:27:08 | <b>File Name</b> C:\USERS\Лабa534\DOWNLOADS\FZ8490-1.JDF | <b>Original Points Count</b> 16384   | <b>Owner</b> CKP              |
| <b>Nucleus</b> 1H                      | <b>Number of Transients</b> 8                            | <b>Origin</b> ECA 600                | <b>Receiver Gain</b> 36.00    |
| <b>Points Count</b> 16384              | <b>Pulse Sequence</b> single_pulse.ex2                   | <b>Temperature (degree C)</b> 22.900 | <b>Solvent</b> CHLOROFORM-d   |
| <b>Spectrum Offset (Hz)</b> 5412.0542  | <b>Sweep Width (Hz)</b> 16534.39                         |                                      |                               |



FZ8490-1.JDF

14d

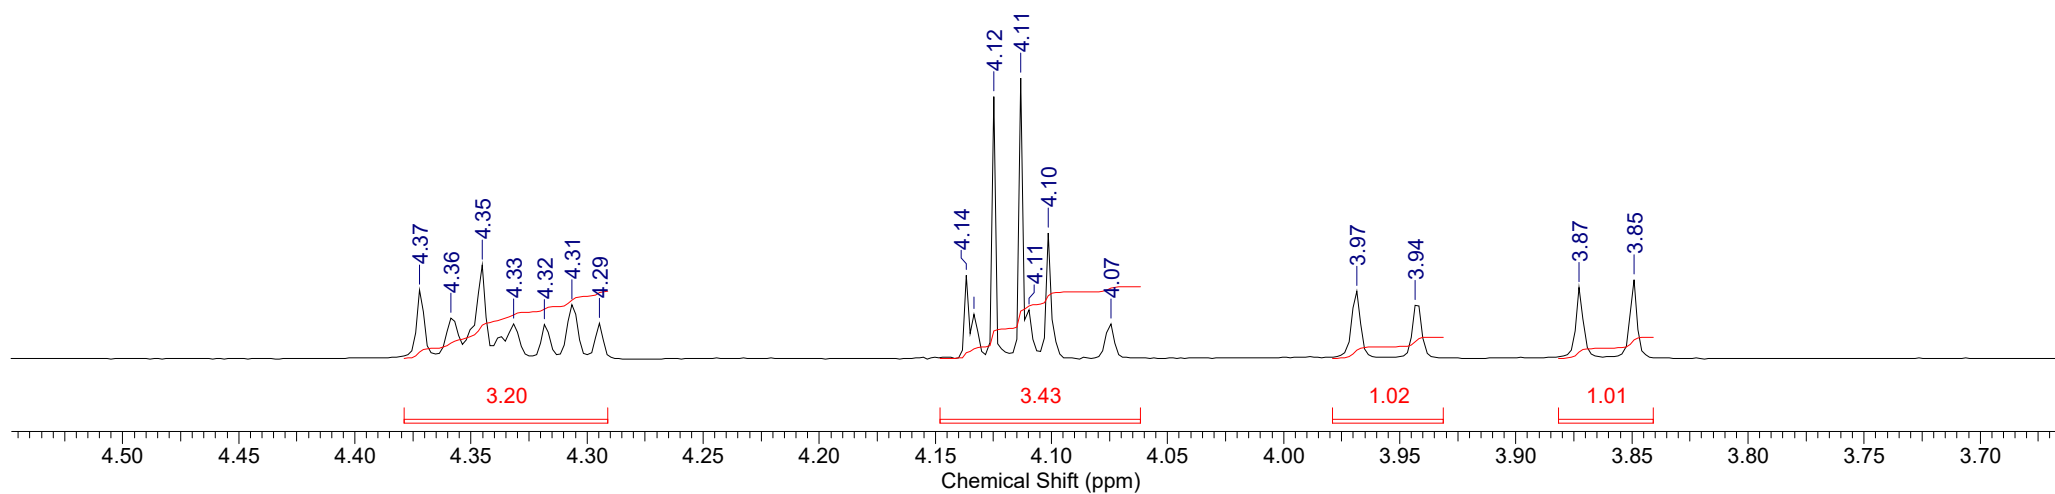

|                                                                                             |                    |
|---------------------------------------------------------------------------------------------|--------------------|
| <b>Formula</b> C <sub>24</sub> H <sub>21</sub> F <sub>3</sub> N <sub>3</sub> O <sub>5</sub> | <b>FW</b> 474.4291 |
|---------------------------------------------------------------------------------------------|--------------------|

|                                        |                                        |                                                          |                                    |
|----------------------------------------|----------------------------------------|----------------------------------------------------------|------------------------------------|
| <b>Acquisition Time (sec)</b> 0.9909   | <b>Comment</b> single pulse            | <b>Date</b> 07 Feb 2020 08:41:28                         |                                    |
| <b>Date Stamp</b> 19 Feb 2020 10:27:08 |                                        | <b>File Name</b> C:\USERS\Лабa534\DOWNLOADS\FZ8490-1.JDF | <b>Frequency (MHz)</b> 600.17      |
| <b>Nucleus</b> 1H                      | <b>Number of Transients</b> 8          | <b>Origin</b> ECA 600                                    | <b>Original Points Count</b> 16384 |
| <b>Points Count</b> 16384              | <b>Pulse Sequence</b> single_pulse.ex2 | <b>Receiver Gain</b> 36.00                               | <b>Owner</b> CKP                   |
| <b>Spectrum Offset (Hz)</b> 5412.0542  | <b>Sweep Width (Hz)</b> 16534.39       | <b>Temperature (degree C)</b> 22.900                     | <b>Solvent</b> CHLOROFORM-d        |



FZ8490-1.JDF

14d

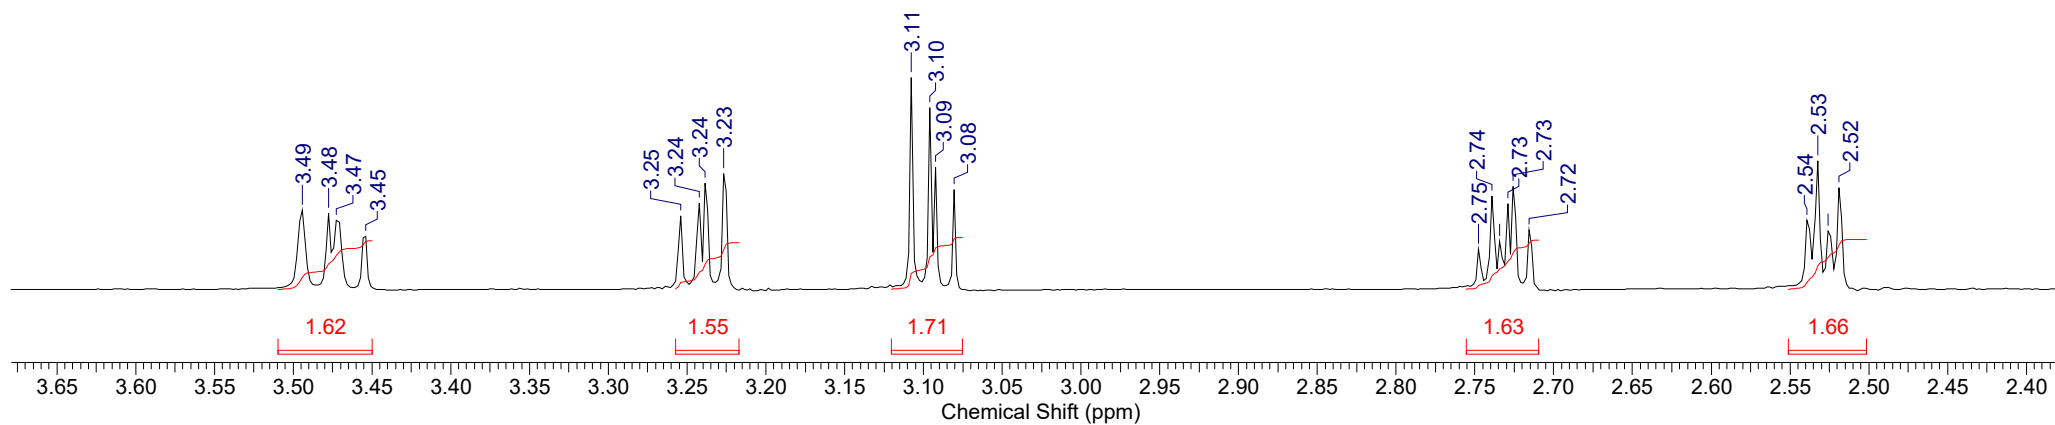

|                                                                                             |                    |
|---------------------------------------------------------------------------------------------|--------------------|
| <b>Formula</b> C <sub>24</sub> H <sub>21</sub> F <sub>3</sub> N <sub>3</sub> O <sub>5</sub> | <b>FW</b> 474.4291 |
|---------------------------------------------------------------------------------------------|--------------------|

|                                        |                                                 |                                      |
|----------------------------------------|-------------------------------------------------|--------------------------------------|
| <b>Acquisition Time (sec)</b> 0.6921   | <b>Comment</b> single pulse decoupled gated NOE | <b>Date</b> 27 Feb 2020 17:32:34     |
| <b>Date Stamp</b> 27 Feb 2020 16:52:15 | <b>File Name</b> H:\DOWNLOADS\FZ8534-1.JDF      | <b>Frequency (MHz)</b> 150.91        |
| <b>Nucleus</b> 13C                     | <b>Number of Transients</b> 1000                | <b>Origin</b> ECA 600                |
| <b>Points Count</b> 32768              | <b>Pulse Sequence</b> single pulse dec          | <b>Original Points Count</b> 32768   |
| <b>Solvent</b> CHLOROFORM-d            | <b>Spectrum Offset (Hz)</b> 15091.3428          | <b>Receiver Gain</b> 54.00           |
|                                        | <b>Sweep Width (Hz)</b> 47348.49                | <b>Owner</b> CKP                     |
|                                        |                                                 | <b>Temperature (degree C)</b> 23.700 |

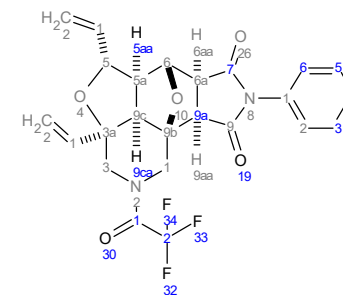

FZ8534-1 PK-2701 (13C).ESP

14d

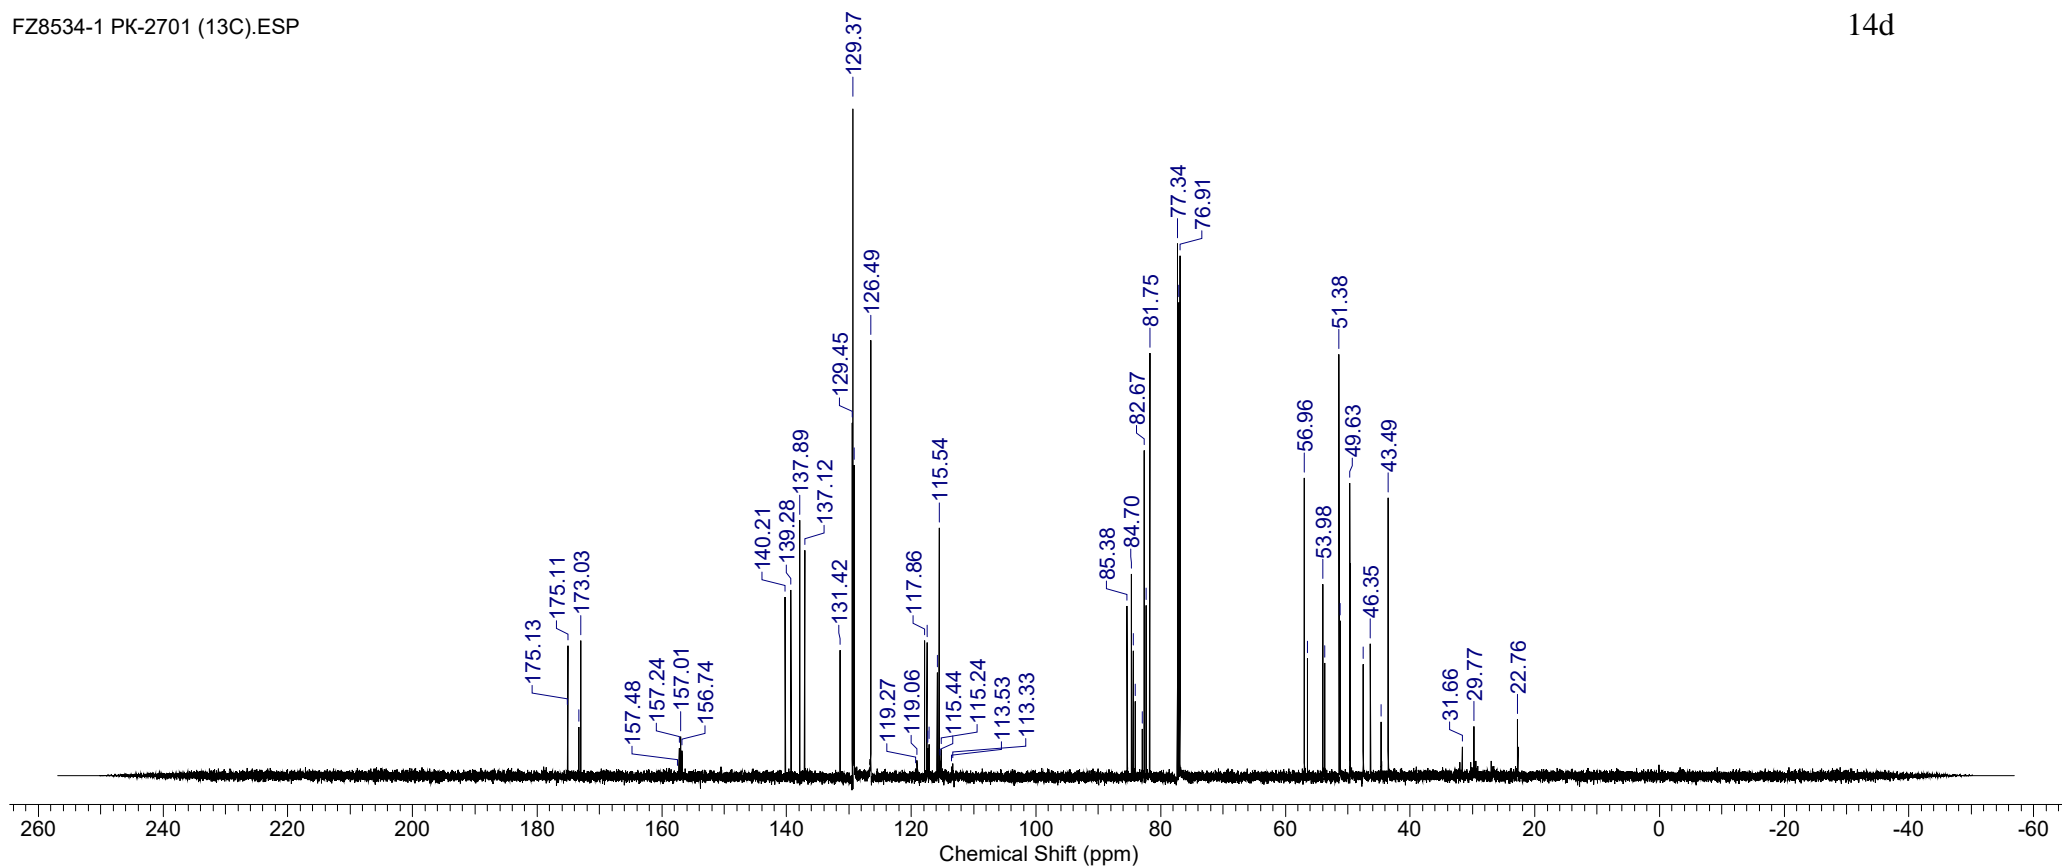

|                                                                                             |                    |
|---------------------------------------------------------------------------------------------|--------------------|
| <b>Formula</b> C <sub>24</sub> H <sub>21</sub> F <sub>3</sub> N <sub>3</sub> O <sub>5</sub> | <b>FW</b> 474.4291 |
|---------------------------------------------------------------------------------------------|--------------------|

|                                        |                                                 |                                      |
|----------------------------------------|-------------------------------------------------|--------------------------------------|
| <b>Acquisition Time (sec)</b> 0.6921   | <b>Comment</b> single pulse decoupled gated NOE | <b>Date</b> 27 Feb 2020 17:32:34     |
| <b>Date Stamp</b> 27 Feb 2020 16:52:15 | <b>File Name</b> H:\DOWNLOADS\FZ8534-1.JDF      | <b>Frequency (MHz)</b> 150.91        |
| <b>Nucleus</b> 13C                     | <b>Number of Transients</b> 1000                | <b>Origin</b> ECA 600                |
| <b>Points Count</b> 32768              | <b>Pulse Sequence</b> single pulse dec          | <b>Original Points Count</b> 32768   |
| <b>Solvent</b> CHLOROFORM-d            | <b>Spectrum Offset (Hz)</b> 15091.3428          | <b>Receiver Gain</b> 54.00           |
|                                        | <b>Sweep Width (Hz)</b> 47348.49                | <b>Owner</b> CKP                     |
|                                        |                                                 | <b>Temperature (degree C)</b> 23.700 |



FZ8534-1 PK-2701 (13C).ESP

14d

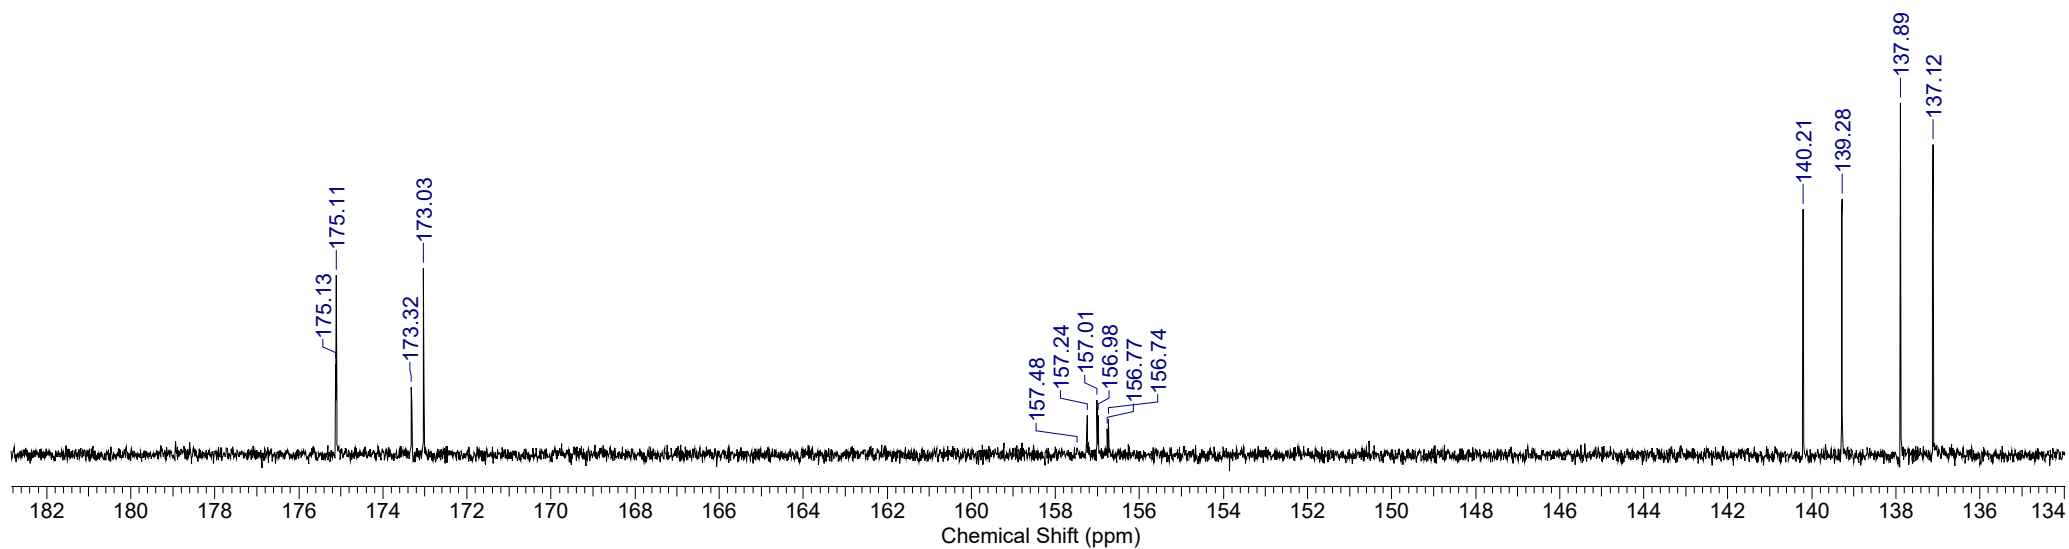



|                                                                                             |                    |
|---------------------------------------------------------------------------------------------|--------------------|
| <b>Formula</b> C <sub>24</sub> H <sub>21</sub> F <sub>3</sub> N <sub>3</sub> O <sub>5</sub> | <b>FW</b> 474.4291 |
|---------------------------------------------------------------------------------------------|--------------------|

|                                        |                                                 |                                      |
|----------------------------------------|-------------------------------------------------|--------------------------------------|
| <b>Acquisition Time (sec)</b> 0.6921   | <b>Comment</b> single pulse decoupled gated NOE | <b>Date</b> 27 Feb 2020 17:32:34     |
| <b>Date Stamp</b> 27 Feb 2020 16:52:15 | <b>File Name</b> H:\DOWNLOADS\FZ8534-1.JDF      | <b>Frequency (MHz)</b> 150.91        |
| <b>Nucleus</b> 13C                     | <b>Number of Transients</b> 1000                | <b>Origin</b> ECA 600                |
| <b>Points Count</b> 32768              | <b>Pulse Sequence</b> single pulse dec          | <b>Original Points Count</b> 32768   |
| <b>Solvent</b> CHLOROFORM-d            | <b>Spectrum Offset (Hz)</b> 15091.3428          | <b>Receiver Gain</b> 54.00           |
|                                        | <b>Sweep Width (Hz)</b> 47348.49                | <b>Owner</b> CKP                     |
|                                        |                                                 | <b>Temperature (degree C)</b> 23.700 |



14d

FZ8534-1 PK-2701 (13C).ESP

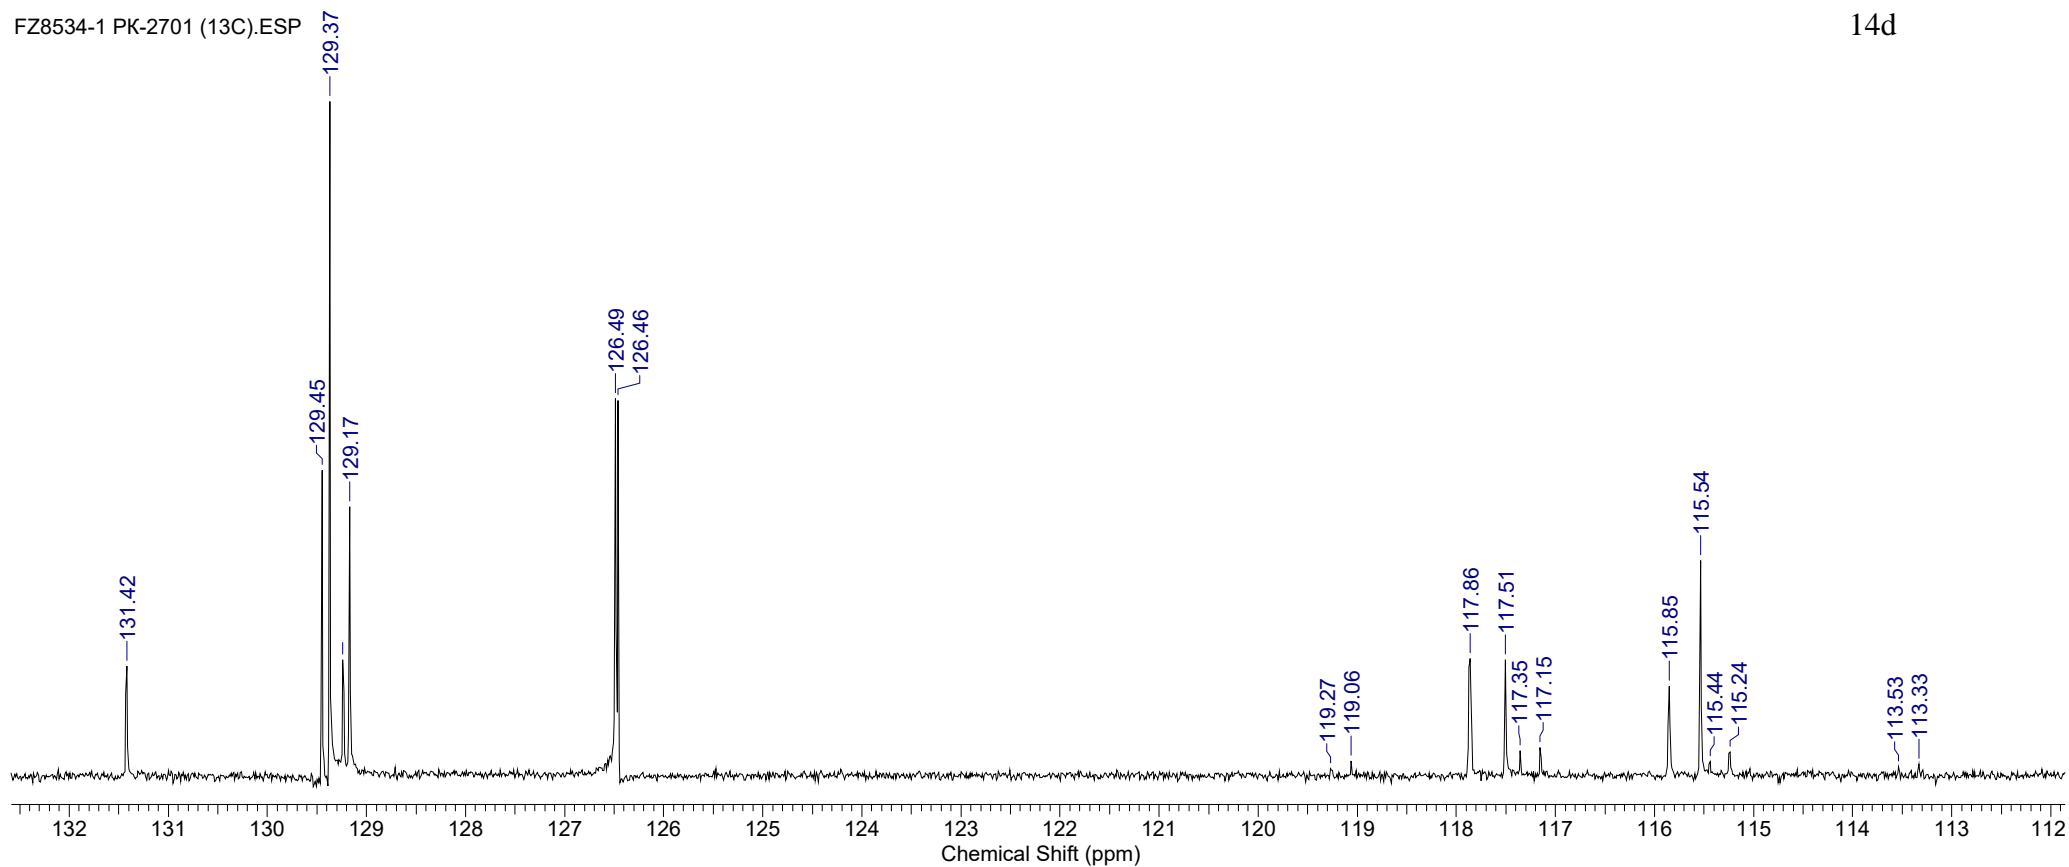

|                                                                                             |                    |
|---------------------------------------------------------------------------------------------|--------------------|
| <b>Formula</b> C <sub>24</sub> H <sub>21</sub> F <sub>3</sub> N <sub>3</sub> O <sub>5</sub> | <b>FW</b> 474.4291 |
|---------------------------------------------------------------------------------------------|--------------------|

|                                        |                                                 |                                      |
|----------------------------------------|-------------------------------------------------|--------------------------------------|
| <b>Acquisition Time (sec)</b> 0.6921   | <b>Comment</b> single pulse decoupled gated NOE | <b>Date</b> 27 Feb 2020 17:32:34     |
| <b>Date Stamp</b> 27 Feb 2020 16:52:15 | <b>File Name</b> H:\DOWNLOADS\FZ8534-1.JDF      | <b>Frequency (MHz)</b> 150.91        |
| <b>Nucleus</b> 13C                     | <b>Number of Transients</b> 1000                | <b>Origin</b> ECA 600                |
| <b>Points Count</b> 32768              | <b>Pulse Sequence</b> single pulse dec          | <b>Original Points Count</b> 32768   |
| <b>Solvent</b> CHLOROFORM-d            | <b>Spectrum Offset (Hz)</b> 15091.3428          | <b>Receiver Gain</b> 54.00           |
|                                        | <b>Sweep Width (Hz)</b> 47348.49                | <b>Owner</b> CKP                     |
|                                        |                                                 | <b>Temperature (degree C)</b> 23.700 |



FZ8534-1 PK-2701 (13C).ESP

14d

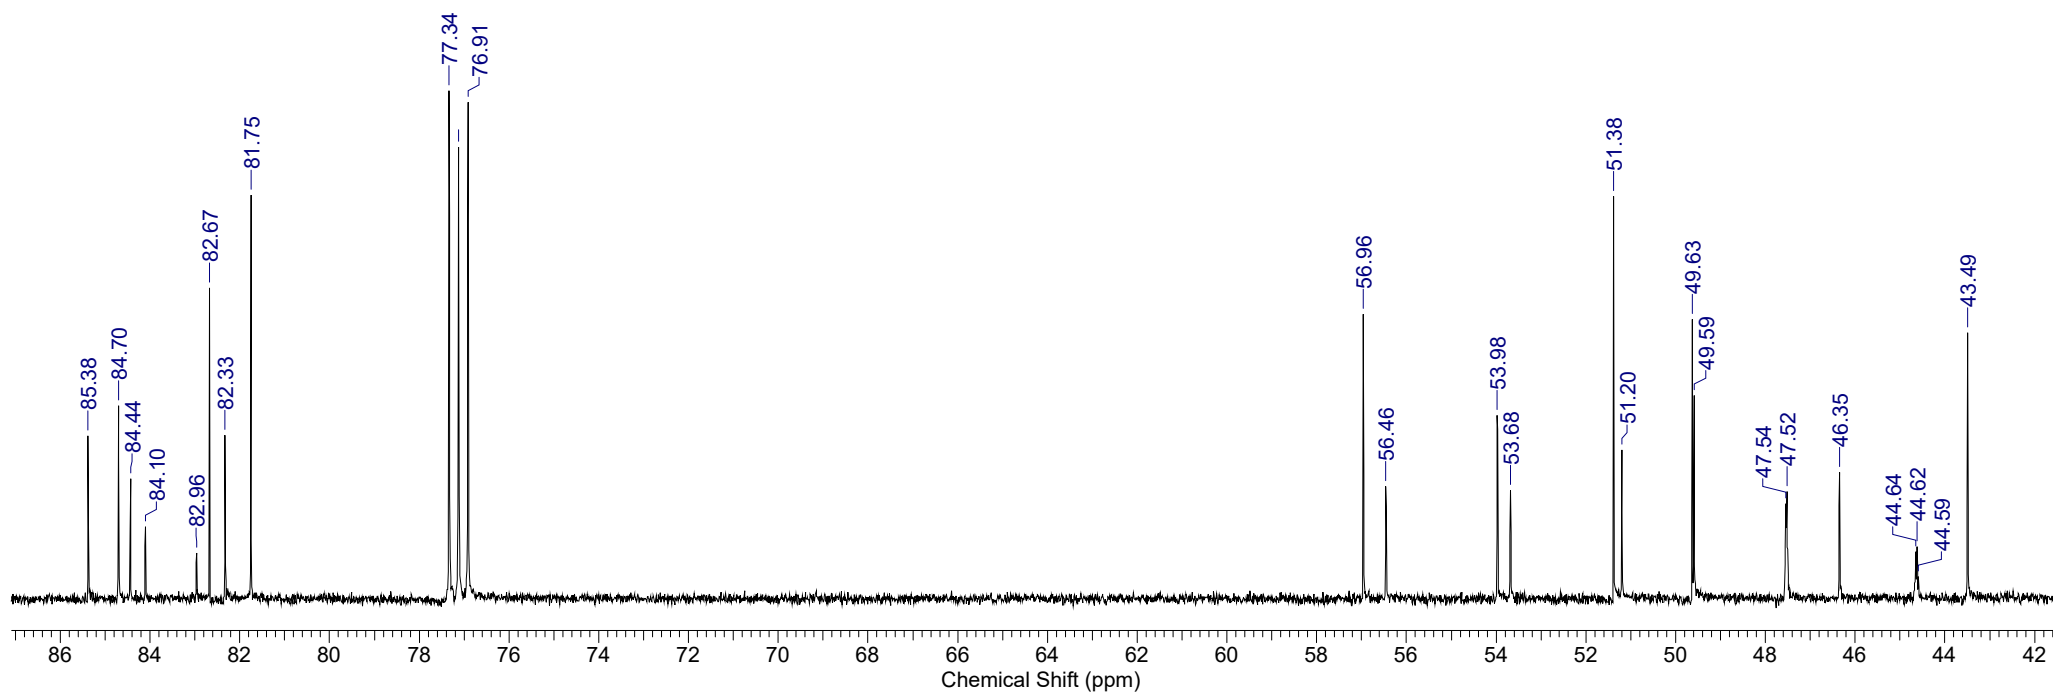

|                                                                                             |                    |
|---------------------------------------------------------------------------------------------|--------------------|
| <b>Formula</b> C <sub>24</sub> H <sub>21</sub> F <sub>3</sub> N <sub>3</sub> O <sub>5</sub> | <b>FW</b> 474.4291 |
|---------------------------------------------------------------------------------------------|--------------------|

|                                                              |                                    |                                         |                                        |
|--------------------------------------------------------------|------------------------------------|-----------------------------------------|----------------------------------------|
| <b>Acquisition Time (sec)</b> 0.4614                         | <b>Comment</b> single_pulse        | <b>Date</b> 05 Aug 2020 11:02:14        | <b>Date Stamp</b> 05 Aug 2020 11:02:55 |
| <b>File Name</b> C:\USERS\Лабa534\DOWNLOADS\FZ8938-1 (1).JDF | <b>Frequency (MHz)</b> 564.73      | <b>Nucleus</b> 19F                      | <b>Number of Transients</b> 8          |
| <b>Origin</b> ECA 600                                        | <b>Original Points Count</b> 65536 | <b>Owner</b> CKP                        | <b>Pulse Sequence</b> single_pulse.ex2 |
| <b>Receiver Gain</b> 44.00                                   | <b>Solvent</b> CHLOROFORM-d        | <b>Spectrum Offset (Hz)</b> -56472.6094 | <b>Sweep Width (Hz)</b> 142045.45      |

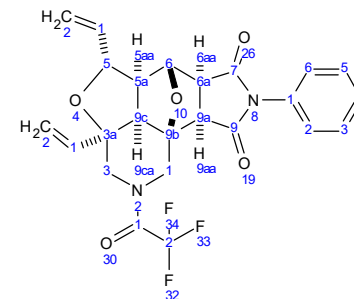

14d

FZ8938-1 (1).JDF

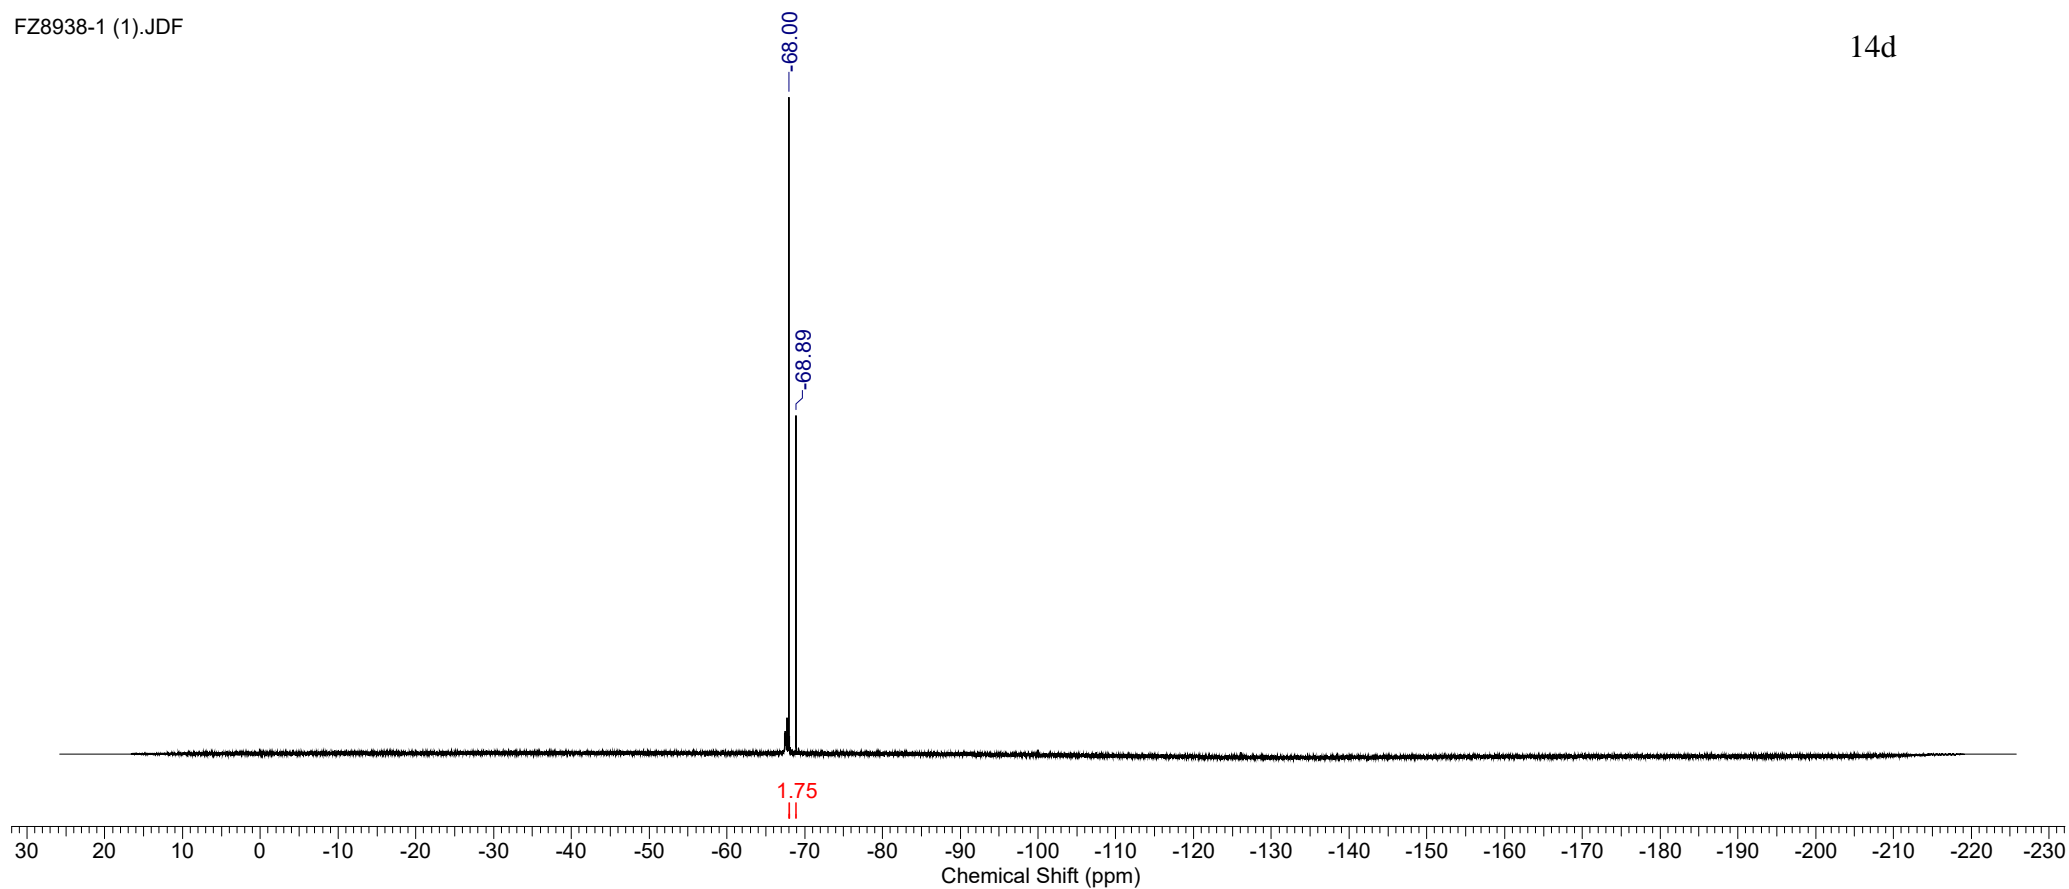

|                                                                                             |                    |
|---------------------------------------------------------------------------------------------|--------------------|
| <b>Formula</b> C <sub>24</sub> H <sub>21</sub> F <sub>3</sub> N <sub>3</sub> O <sub>5</sub> | <b>FW</b> 474.4291 |
|---------------------------------------------------------------------------------------------|--------------------|

|                                                               |                                    |                                         |                                        |
|---------------------------------------------------------------|------------------------------------|-----------------------------------------|----------------------------------------|
| <b>Acquisition Time (sec)</b> 0.4614                          | <b>Comment</b> single_pulse        | <b>Date</b> 05 Aug 2020 11:02:14        | <b>Date Stamp</b> 05 Aug 2020 11:02:55 |
| <b>File Name</b> C:\USERS\Лаб6а534\DOWNLOADS\FZ8938-1 (1).JDF | <b>Frequency (MHz)</b> 564.73      | <b>Nucleus</b> 19F                      | <b>Number of Transients</b> 8          |
| <b>Origin</b> ECA 600                                         | <b>Original Points Count</b> 65536 | <b>Owner</b> CKP                        | <b>Pulse Sequence</b> single_pulse.ex2 |
| <b>Receiver Gain</b> 44.00                                    | <b>Solvent</b> CHLOROFORM-d        | <b>Spectrum Offset (Hz)</b> -56472.6094 | <b>Sweep Width (Hz)</b> 142045.45      |

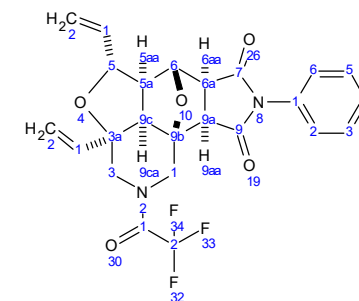

14d

FZ8938-1 (1).JDF

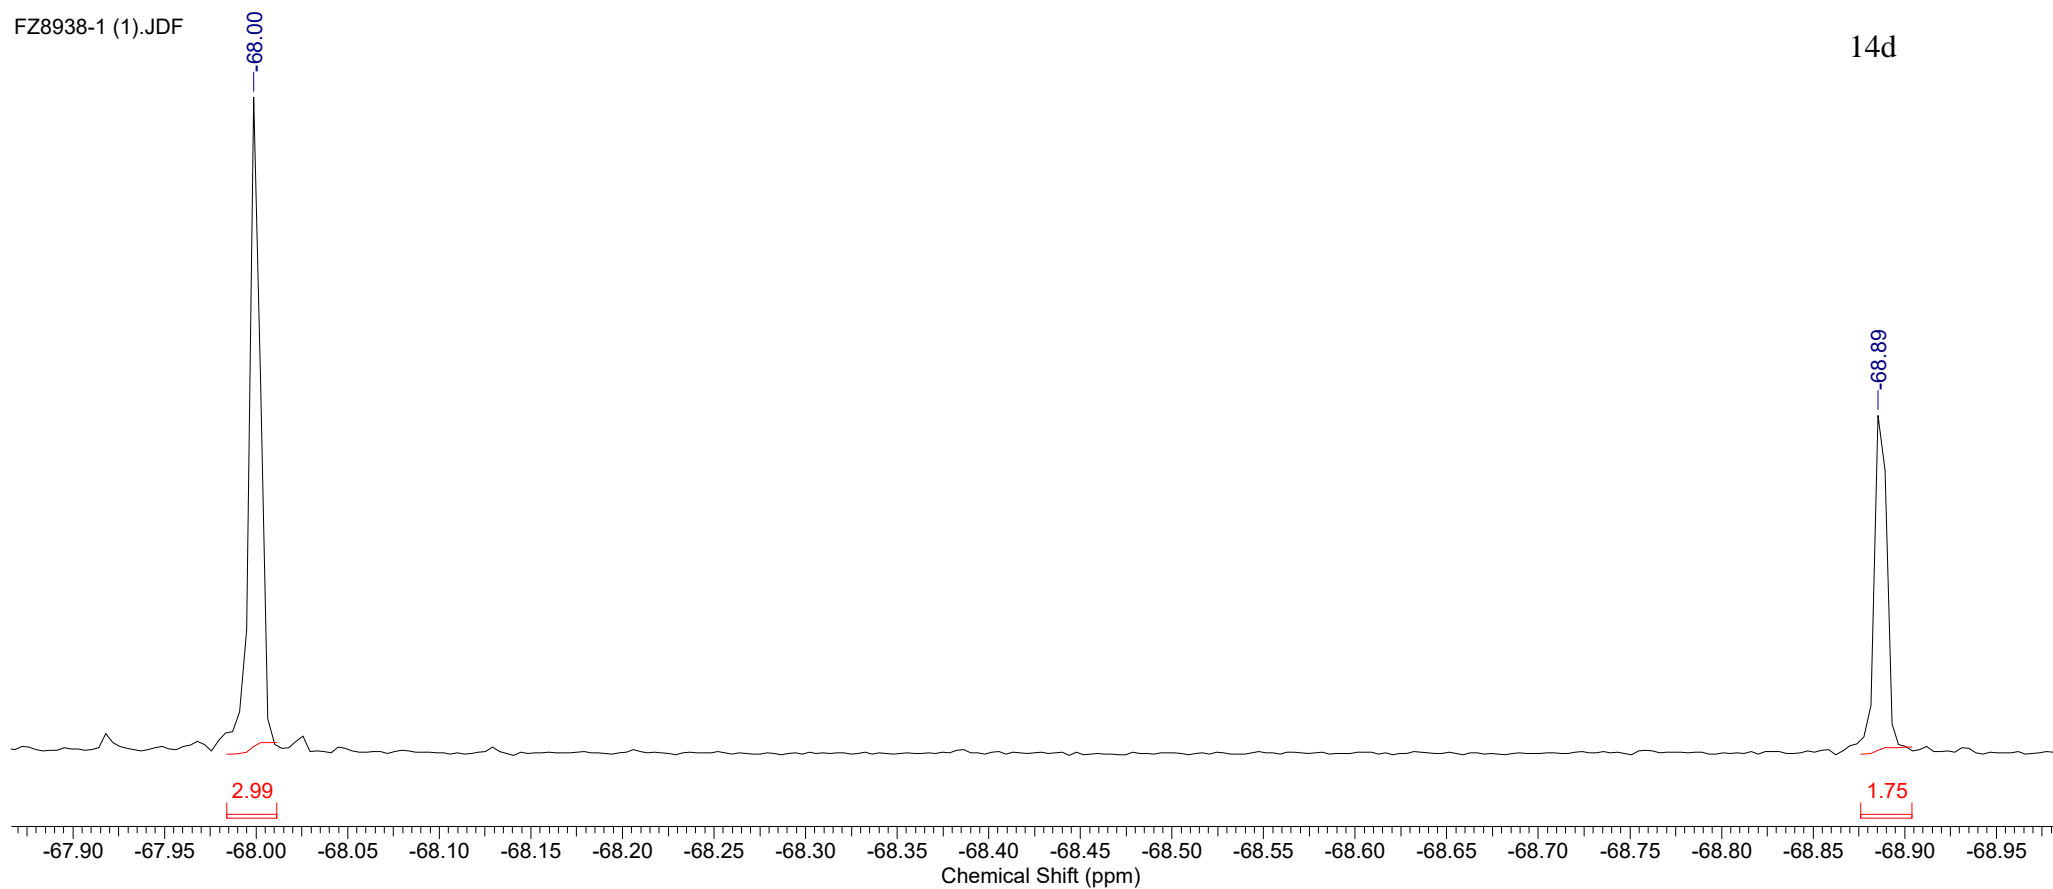

|                                                                                              |                    |
|----------------------------------------------------------------------------------------------|--------------------|
| <b>Formula</b> C <sub>24</sub> H <sub>21</sub> Cl <sub>3</sub> N <sub>3</sub> O <sub>5</sub> | <b>FW</b> 523.7929 |
|----------------------------------------------------------------------------------------------|--------------------|

|                                                              |                                    |                                       |                                        |
|--------------------------------------------------------------|------------------------------------|---------------------------------------|----------------------------------------|
| <b>Acquisition Time (sec)</b> 1.9818                         | <b>Comment</b> single pulse        | <b>Date</b> 31 Jul 2020 11:12:55      | <b>Date Stamp</b> 31 Jul 2020 11:14:13 |
| <b>File Name</b> C:\USERS\Лабa534\DOWNLOADS\FZ8911-1 (3).JDF | <b>Frequency (MHz)</b> 600.17      | <b>Nucleus</b> 1H                     | <b>Number of Transients</b> 8          |
| <b>Origin</b> ECA 600                                        | <b>Original Points Count</b> 32768 | <b>Owner</b> CKP                      | <b>Pulse Sequence</b> single_pulse.ex2 |
| <b>Receiver Gain</b> 40.00                                   | <b>Solvent</b> CHLOROFORM-d        | <b>Spectrum Offset (Hz)</b> 5412.1411 | <b>Sweep Width (Hz)</b> 16534.39       |

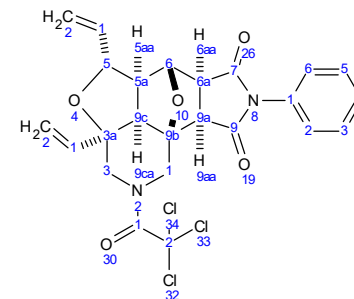

FZ8911-1 (3).ESP

14e

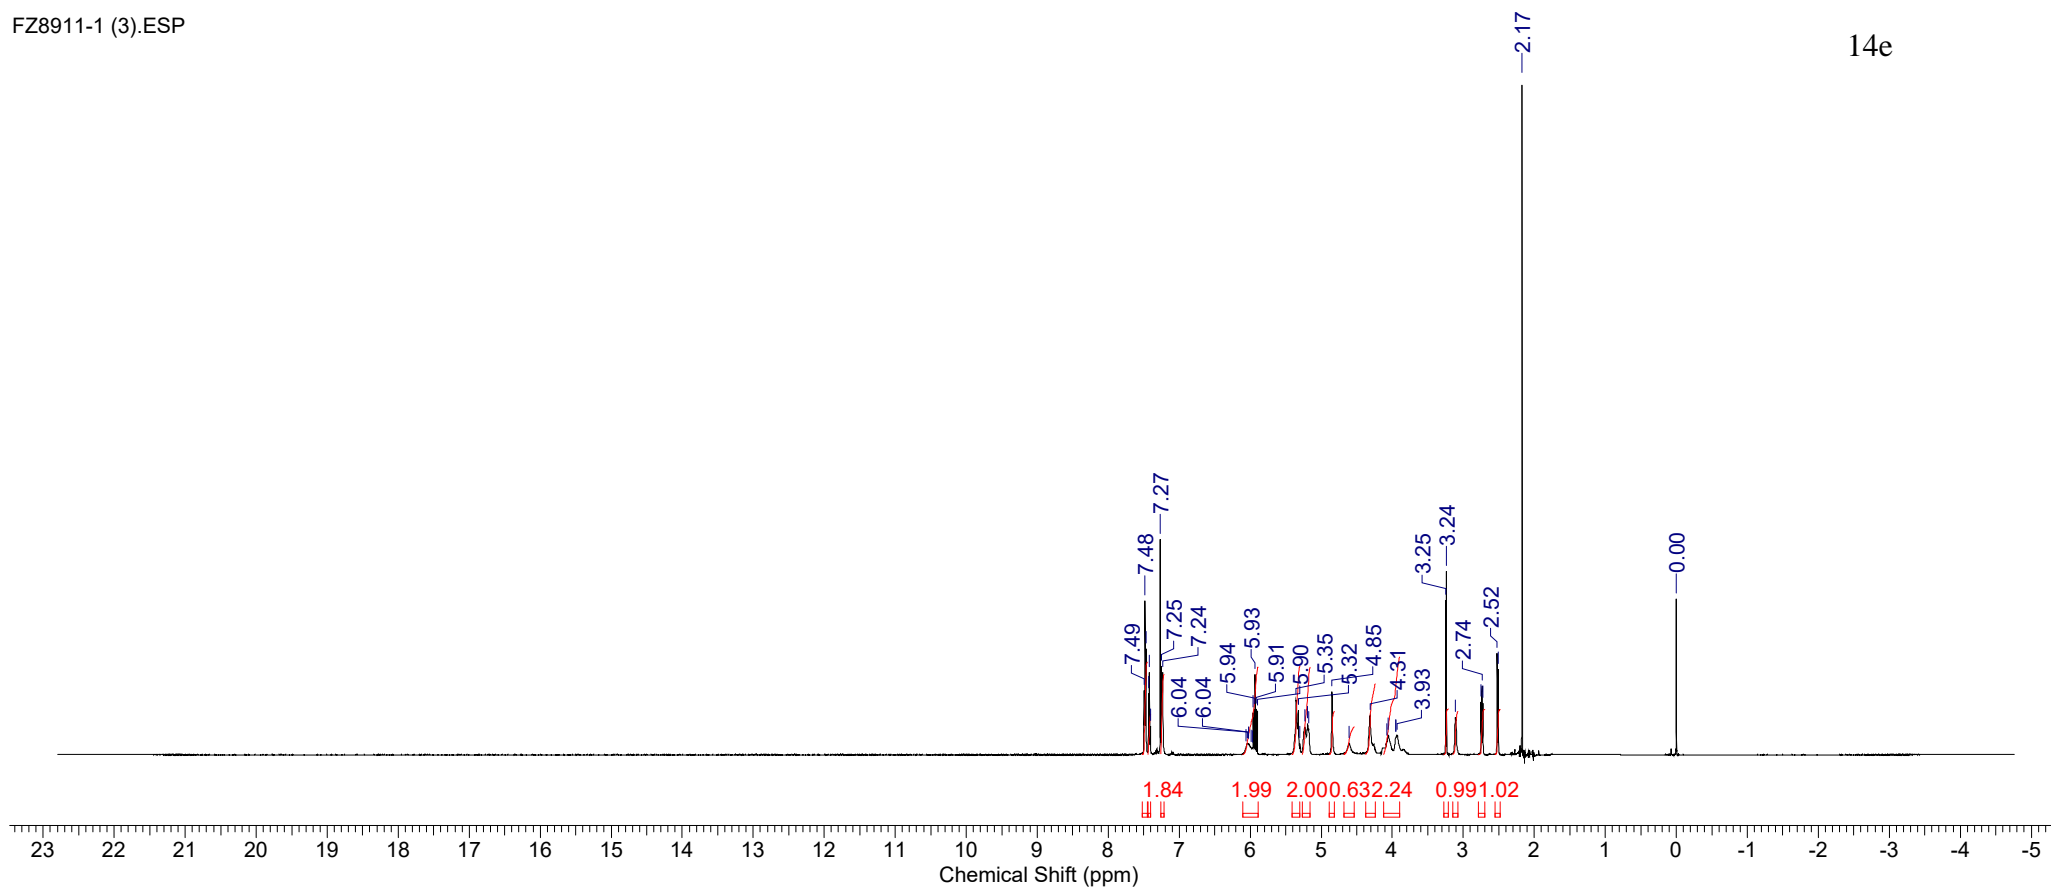

|                                                                                              |                    |
|----------------------------------------------------------------------------------------------|--------------------|
| <b>Formula</b> C <sub>24</sub> H <sub>21</sub> Cl <sub>3</sub> N <sub>3</sub> O <sub>5</sub> | <b>FW</b> 523.7929 |
|----------------------------------------------------------------------------------------------|--------------------|

|                                                              |                                    |                                       |                                        |
|--------------------------------------------------------------|------------------------------------|---------------------------------------|----------------------------------------|
| <b>Acquisition Time (sec)</b> 1.9818                         | <b>Comment</b> single pulse        | <b>Date</b> 31 Jul 2020 11:12:55      | <b>Date Stamp</b> 31 Jul 2020 11:14:13 |
| <b>File Name</b> C:\USERS\Лабa534\DOWNLOADS\FZ8911-1 (3).JDF | <b>Frequency (MHz)</b> 600.17      | <b>Nucleus</b> 1H                     | <b>Number of Transients</b> 8          |
| <b>Origin</b> ECA 600                                        | <b>Original Points Count</b> 32768 | <b>Owner</b> CKP                      | <b>Pulse Sequence</b> single_pulse.ex2 |
| <b>Receiver Gain</b> 40.00                                   | <b>Solvent</b> CHLOROFORM-d        | <b>Spectrum Offset (Hz)</b> 5412.1411 | <b>Sweep Width (Hz)</b> 16534.39       |



FZ8911-1 (3).ESP

14e

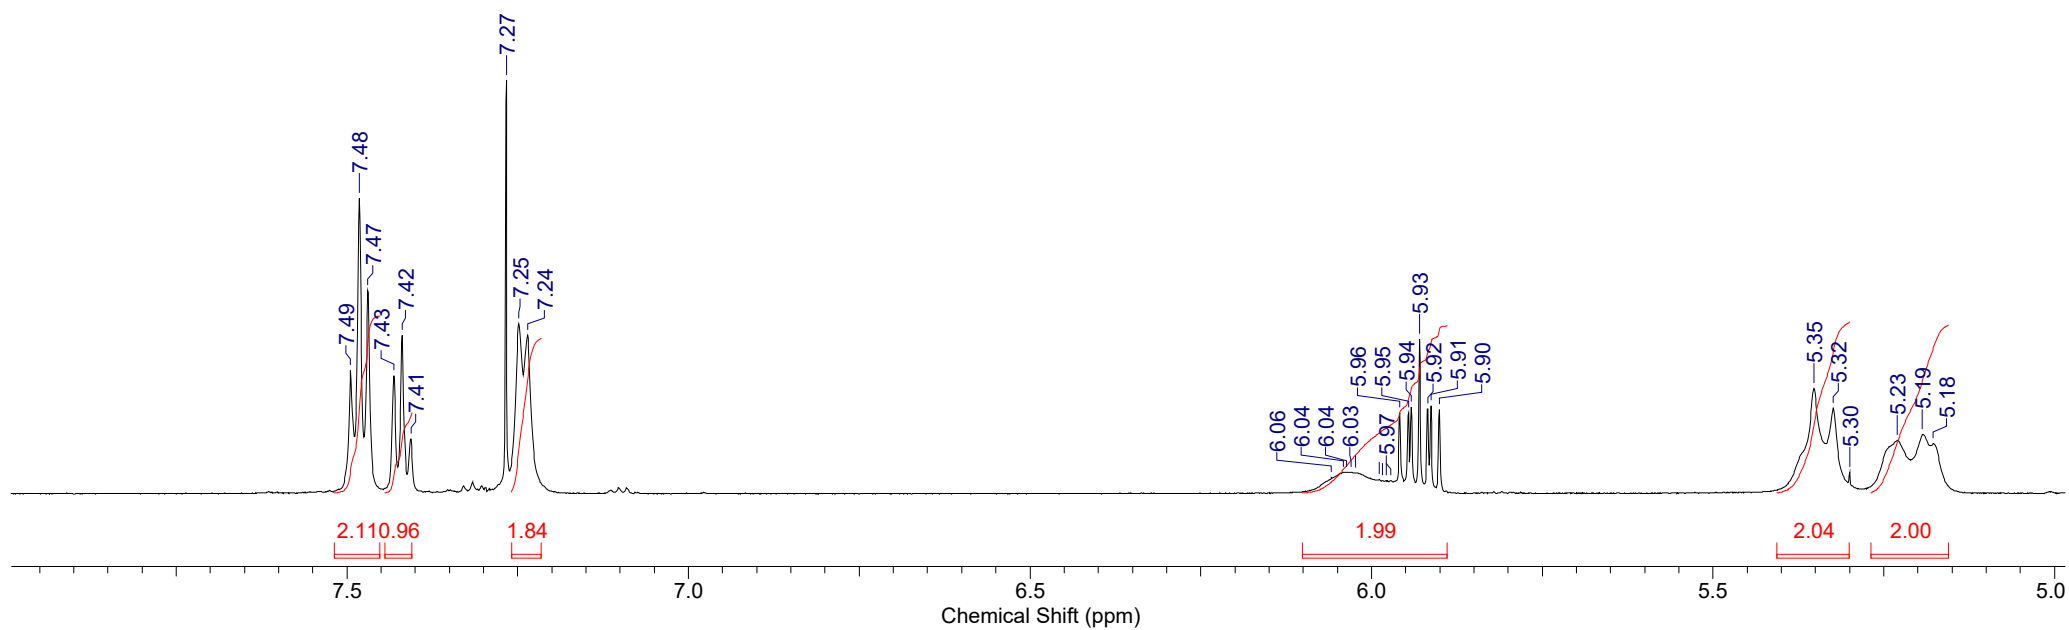

|                                                                                              |                    |
|----------------------------------------------------------------------------------------------|--------------------|
| <b>Formula</b> C <sub>24</sub> H <sub>21</sub> Cl <sub>3</sub> N <sub>3</sub> O <sub>5</sub> | <b>FW</b> 523.7929 |
|----------------------------------------------------------------------------------------------|--------------------|

|                                                              |                                    |                                       |                                        |
|--------------------------------------------------------------|------------------------------------|---------------------------------------|----------------------------------------|
| <b>Acquisition Time (sec)</b> 1.9818                         | <b>Comment</b> single pulse        | <b>Date</b> 31 Jul 2020 11:12:55      | <b>Date Stamp</b> 31 Jul 2020 11:14:13 |
| <b>File Name</b> C:\USERS\Лабa534\DOWNLOADS\FZ8911-1 (3).JDF | <b>Frequency (MHz)</b> 600.17      | <b>Nucleus</b> 1H                     | <b>Number of Transients</b> 8          |
| <b>Origin</b> ECA 600                                        | <b>Original Points Count</b> 32768 | <b>Owner</b> CKP                      | <b>Pulse Sequence</b> single_pulse.ex2 |
| <b>Receiver Gain</b> 40.00                                   | <b>Solvent</b> CHLOROFORM-d        | <b>Spectrum Offset (Hz)</b> 5412.1411 | <b>Sweep Width (Hz)</b> 16534.39       |



FZ8911-1 (3).ESP

14e

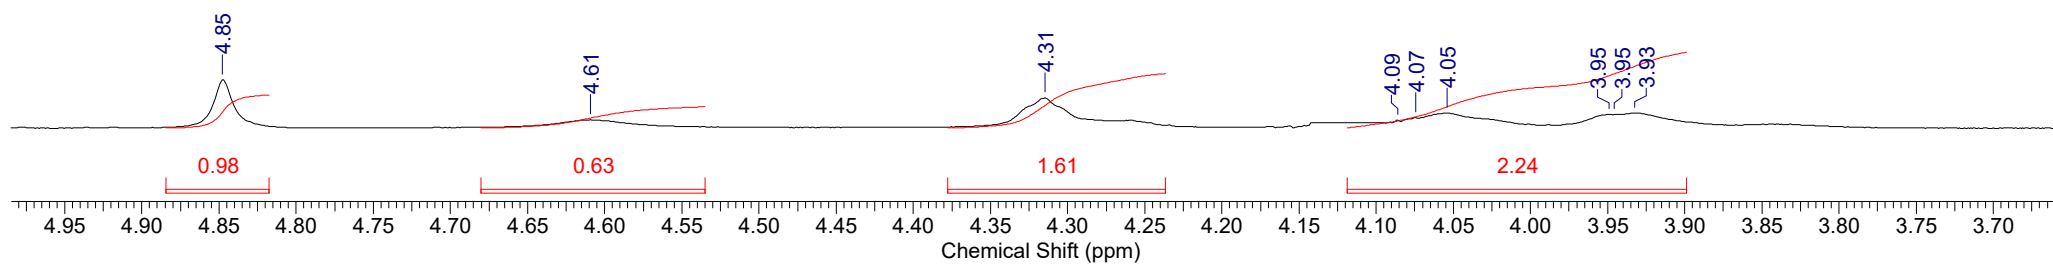

|                                                                                              |                    |
|----------------------------------------------------------------------------------------------|--------------------|
| <b>Formula</b> C <sub>24</sub> H <sub>21</sub> Cl <sub>3</sub> N <sub>3</sub> O <sub>5</sub> | <b>FW</b> 523.7929 |
|----------------------------------------------------------------------------------------------|--------------------|

|                                                              |                                    |                                       |                                        |
|--------------------------------------------------------------|------------------------------------|---------------------------------------|----------------------------------------|
| <b>Acquisition Time (sec)</b> 1.9818                         | <b>Comment</b> single_pulse        | <b>Date</b> 31 Jul 2020 11:12:55      | <b>Date Stamp</b> 31 Jul 2020 11:14:13 |
| <b>File Name</b> C:\USERS\Лабa534\DOWNLOADS\FZ8911-1 (3).JDF | <b>Frequency (MHz)</b> 600.17      | <b>Nucleus</b> 1H                     | <b>Number of Transients</b> 8          |
| <b>Origin</b> ECA 600                                        | <b>Original Points Count</b> 32768 | <b>Owner</b> CKP                      | <b>Pulse Sequence</b> single_pulse.ex2 |
| <b>Receiver Gain</b> 40.00                                   | <b>Solvent</b> CHLOROFORM-d        | <b>Spectrum Offset (Hz)</b> 5412.1411 | <b>Sweep Width (Hz)</b> 16534.39       |

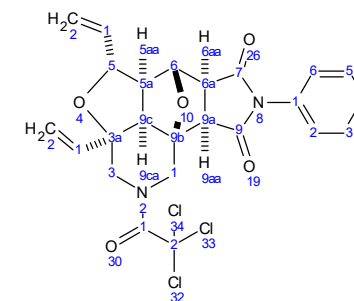

FZ8911-1 (3).ESP

14e

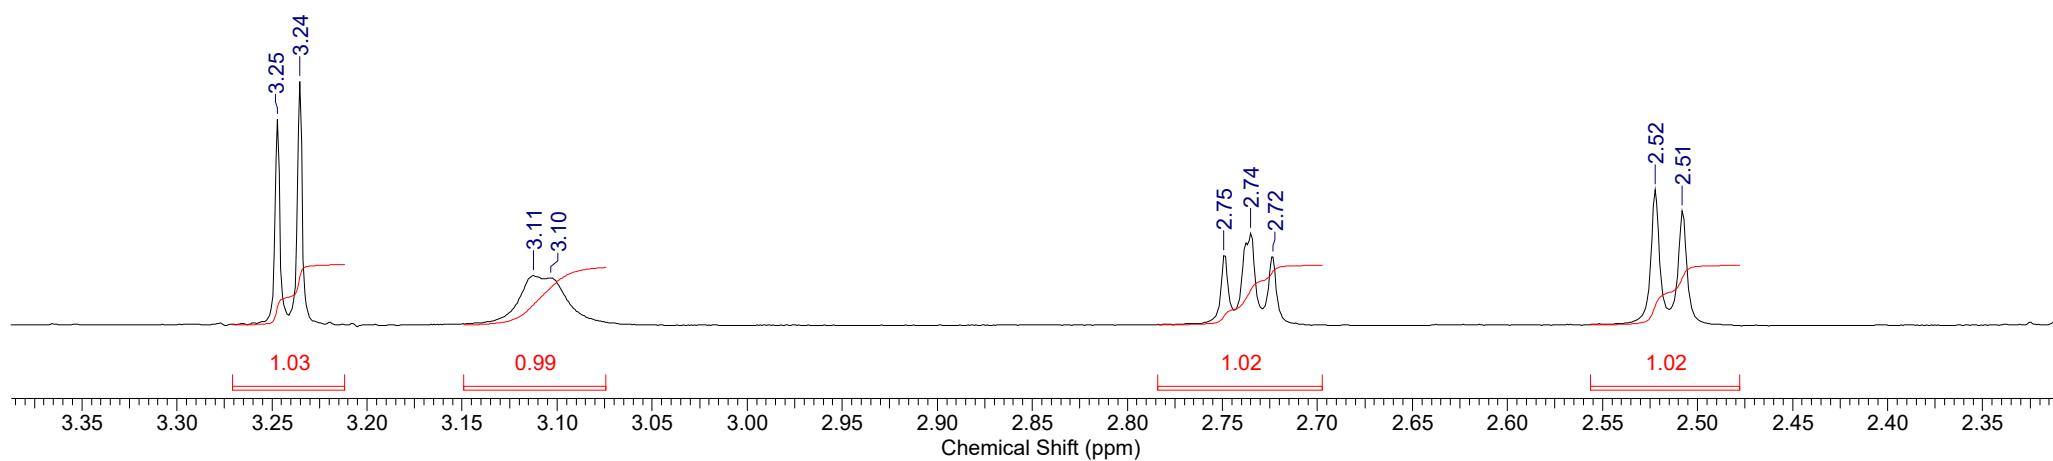



|                                                                                              |                    |
|----------------------------------------------------------------------------------------------|--------------------|
| <b>Formula</b> C <sub>24</sub> H <sub>21</sub> Cl <sub>3</sub> N <sub>2</sub> O <sub>5</sub> | <b>FW</b> 523.7929 |
|----------------------------------------------------------------------------------------------|--------------------|

|                                        |                                                          |                                        |
|----------------------------------------|----------------------------------------------------------|----------------------------------------|
| <b>Acquisition Time (sec)</b> 0.6921   | <b>Comment</b> single pulse decoupled gated NOE          | <b>Date</b> 06 Aug 2020 11:07:39       |
| <b>Date Stamp</b> 06 Aug 2020 11:08:22 | <b>File Name</b> C:\USERS\la6a534\DOWNLOADS\FZ8957-1.JDF |                                        |
| <b>Frequency (MHz)</b> 150.91          | <b>Nucleus</b> 13C                                       | <b>Number of Transients</b> 4000       |
| <b>Original Points Count</b> 32768     | <b>Owner</b> CKP                                         | <b>Points Count</b> 32768              |
| <b>Receiver Gain</b> 58.00             | <b>Solvent</b> CHLOROFORM-d                              | <b>Pulse Sequence</b> single pulse dec |
| <b>Sweep Width (Hz)</b> 47348.49       |                                                          | <b>Spectrum Offset (Hz)</b> 15079.3525 |

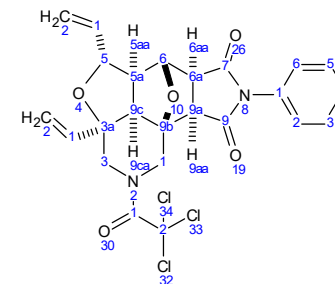

14e

FZ8957-1.JDF

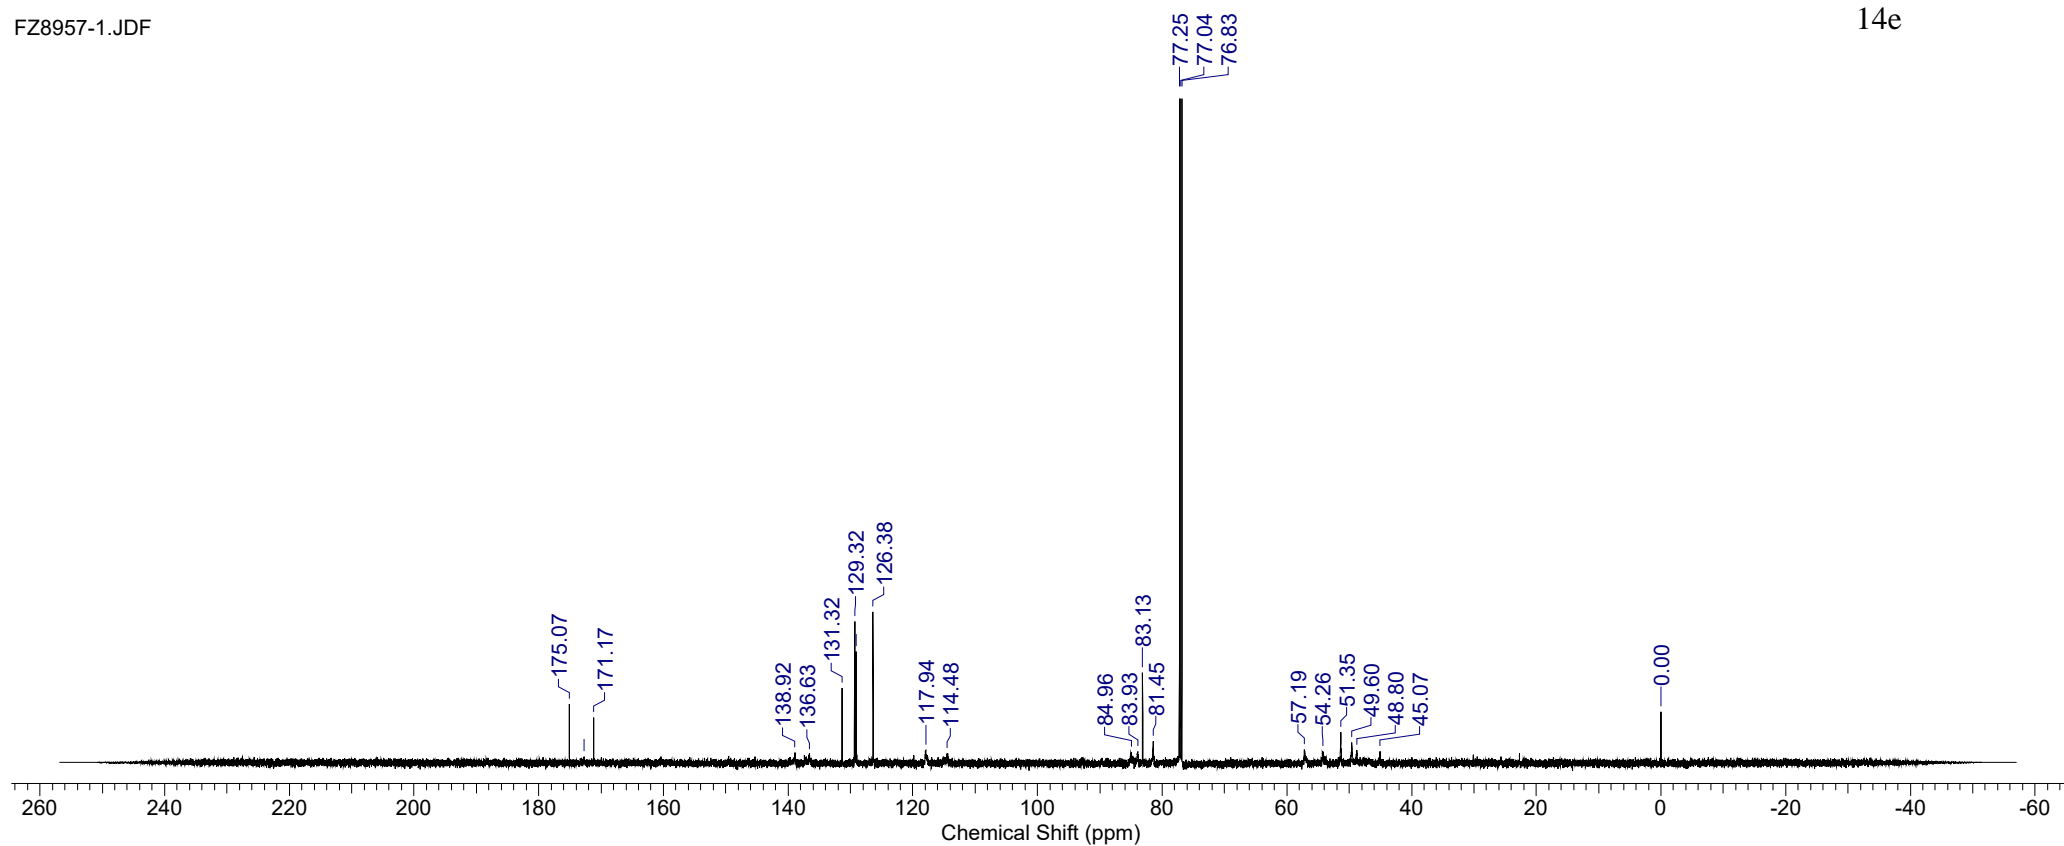

|                                                                                              |                    |
|----------------------------------------------------------------------------------------------|--------------------|
| <b>Formula</b> C <sub>24</sub> H <sub>21</sub> Cl <sub>3</sub> N <sub>3</sub> O <sub>5</sub> | <b>FW</b> 523.7929 |
|----------------------------------------------------------------------------------------------|--------------------|

|                                        |                                                          |                                        |
|----------------------------------------|----------------------------------------------------------|----------------------------------------|
| <b>Acquisition Time (sec)</b> 0.6921   | <b>Comment</b> single pulse decoupled gated NOE          | <b>Date</b> 06 Aug 2020 11:07:39       |
| <b>Date Stamp</b> 06 Aug 2020 11:08:22 | <b>File Name</b> C:\USERS\la6a534\DOWNLOADS\FZ8957-1.JDF |                                        |
| <b>Frequency (MHz)</b> 150.91          | <b>Nucleus</b> 13C                                       | <b>Number of Transients</b> 4000       |
| <b>Original Points Count</b> 32768     | <b>Owner</b> CKP                                         | <b>Points Count</b> 32768              |
| <b>Receiver Gain</b> 58.00             | <b>Solvent</b> CHLOROFORM-d                              | <b>Pulse Sequence</b> single pulse dec |
| <b>Sweep Width (Hz)</b> 47348.49       |                                                          | <b>Spectrum Offset (Hz)</b> 15079.3525 |



14e

FZ8957-1.JDF

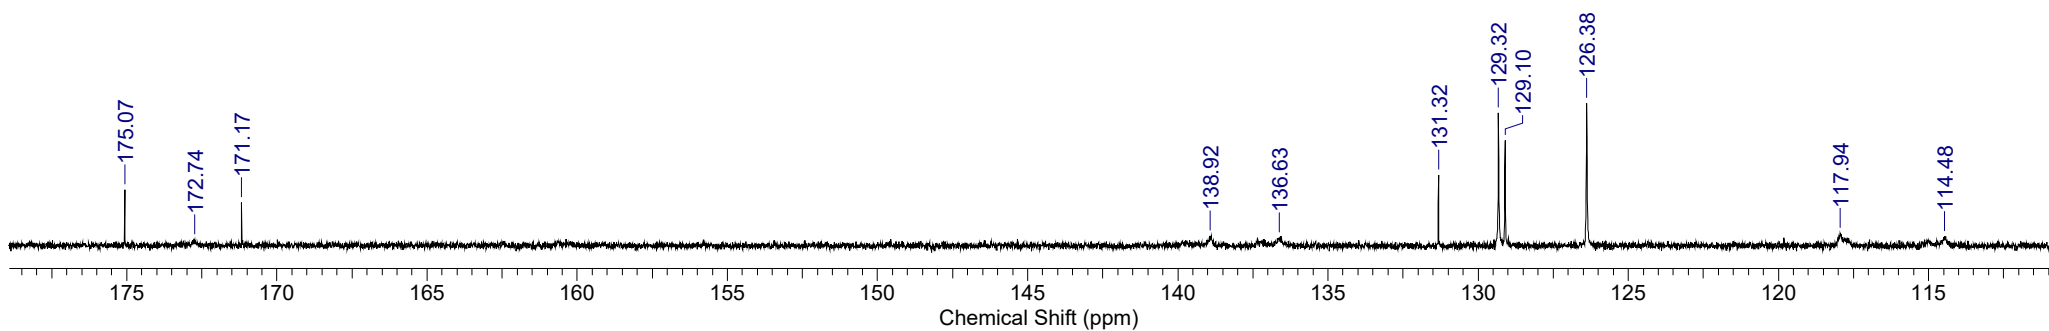

|                                                                                              |                    |
|----------------------------------------------------------------------------------------------|--------------------|
| <b>Formula</b> C <sub>24</sub> H <sub>21</sub> Cl <sub>3</sub> N <sub>3</sub> O <sub>5</sub> | <b>FW</b> 523.7929 |
|----------------------------------------------------------------------------------------------|--------------------|

|                                        |                                                          |                                        |
|----------------------------------------|----------------------------------------------------------|----------------------------------------|
| <b>Acquisition Time (sec)</b> 0.6921   | <b>Comment</b> single pulse decoupled gated NOE          | <b>Date</b> 06 Aug 2020 11:07:39       |
| <b>Date Stamp</b> 06 Aug 2020 11:08:22 | <b>File Name</b> C:\USERS\la6a534\DOWNLOADS\FZ8957-1.JDF |                                        |
| <b>Frequency (MHz)</b> 150.91          | <b>Nucleus</b> 13C                                       | <b>Number of Transients</b> 4000       |
| <b>Original Points Count</b> 32768     | <b>Owner</b> CKP                                         | <b>Points Count</b> 32768              |
| <b>Receiver Gain</b> 58.00             | <b>Solvent</b> CHLOROFORM-d                              | <b>Pulse Sequence</b> single pulse dec |
| <b>Sweep Width (Hz)</b> 47348.49       |                                                          | <b>Spectrum Offset (Hz)</b> 15079.3525 |

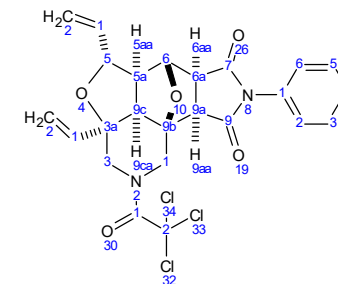

14e

FZ8957-1.JDF

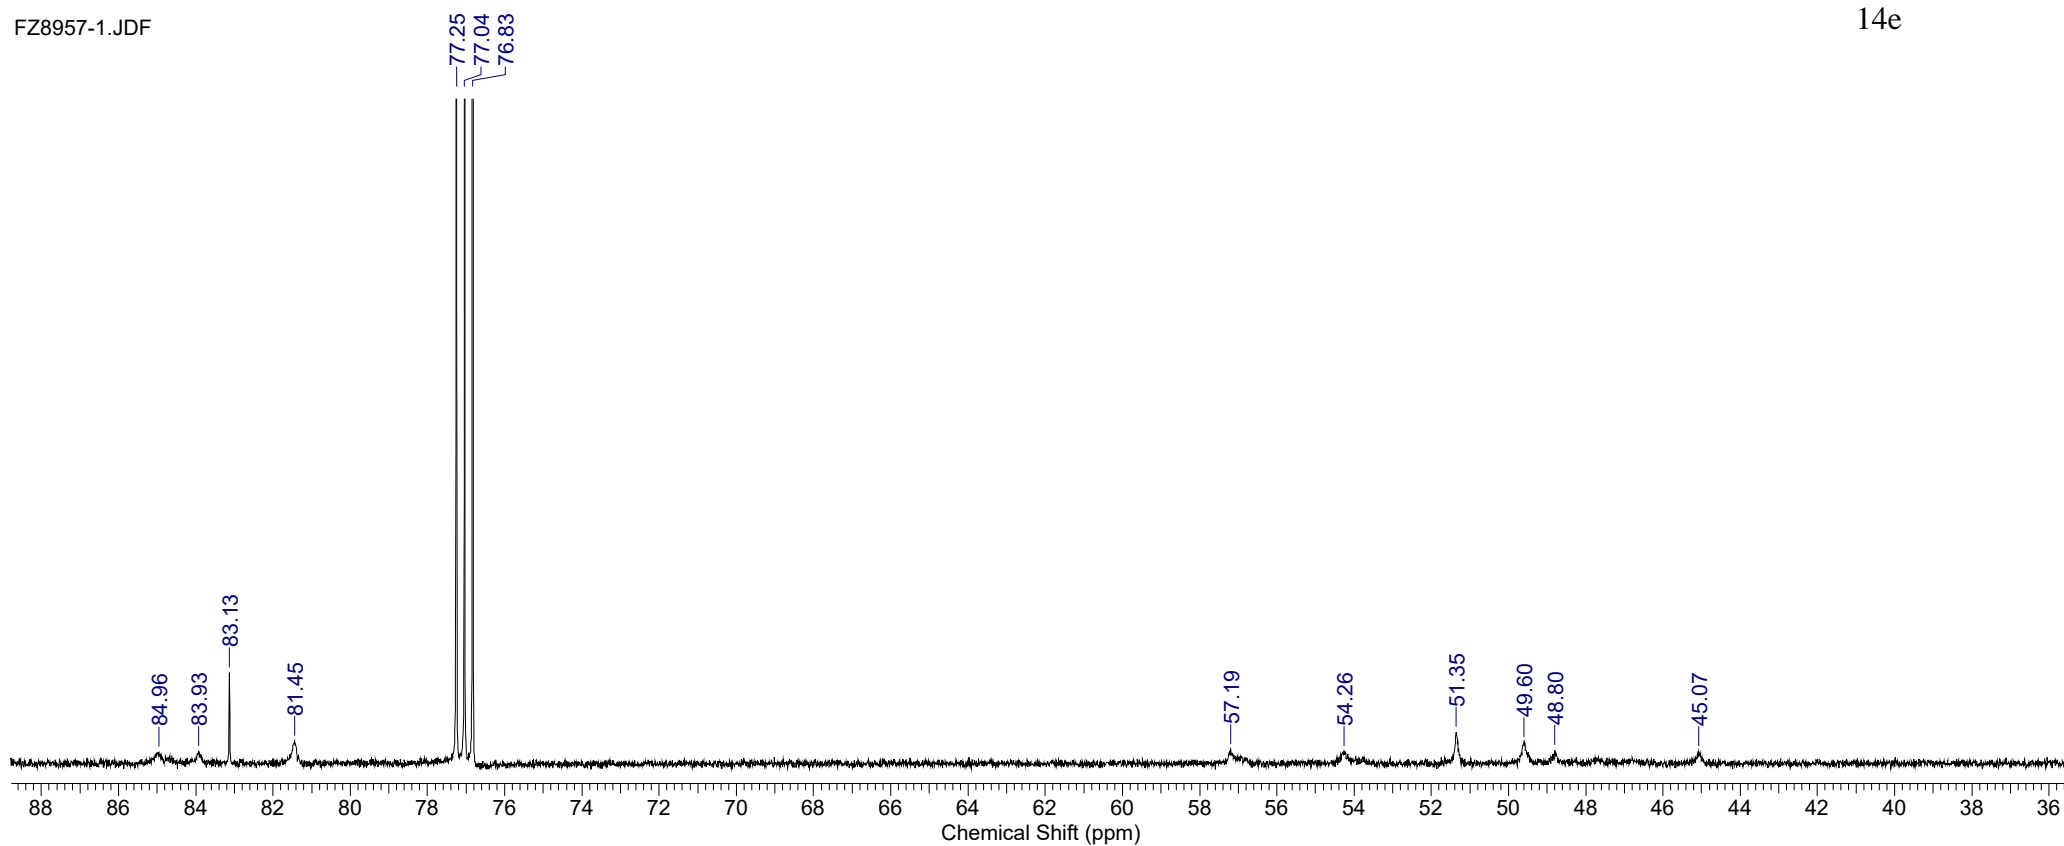

|                                                                |                    |
|----------------------------------------------------------------|--------------------|
| <b>Formula</b> C <sub>22</sub> H <sub>21</sub> NO <sub>5</sub> | <b>FW</b> 379.4058 |
|----------------------------------------------------------------|--------------------|

|                                        |                                        |                                                             |                                    |
|----------------------------------------|----------------------------------------|-------------------------------------------------------------|------------------------------------|
| <b>Acquisition Time (sec)</b> 1.9818   | <b>Comment</b> single pulse            | <b>Date</b> 06 Oct 1990 03:11:15                            |                                    |
| <b>Date Stamp</b> 16 Dec 2019 08:28:05 |                                        | <b>File Name</b> C:\USERS\I\Ia\ba534\DOWNLOADS\FZ8280-1.JDF | <b>Frequency (MHz)</b> 600.17      |
| <b>Nucleus</b> 1H                      | <b>Number of Transients</b> 8          | <b>Origin</b> ECA 600                                       | <b>Original Points Count</b> 32768 |
| <b>Points Count</b> 32768              | <b>Pulse Sequence</b> single_pulse.ex2 | <b>Receiver Gain</b> 40.00                                  | <b>Owner</b> delta                 |
| <b>Spectrum Offset (Hz)</b> 5410.1226  | <b>Sweep Width (Hz)</b> 16534.39       | <b>Temperature (degree C)</b> 23.000                        | <b>Solvent</b> CHLOROFORM-d        |

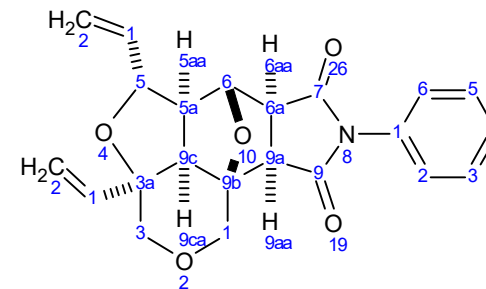

14f

FZ8280-1.JDF

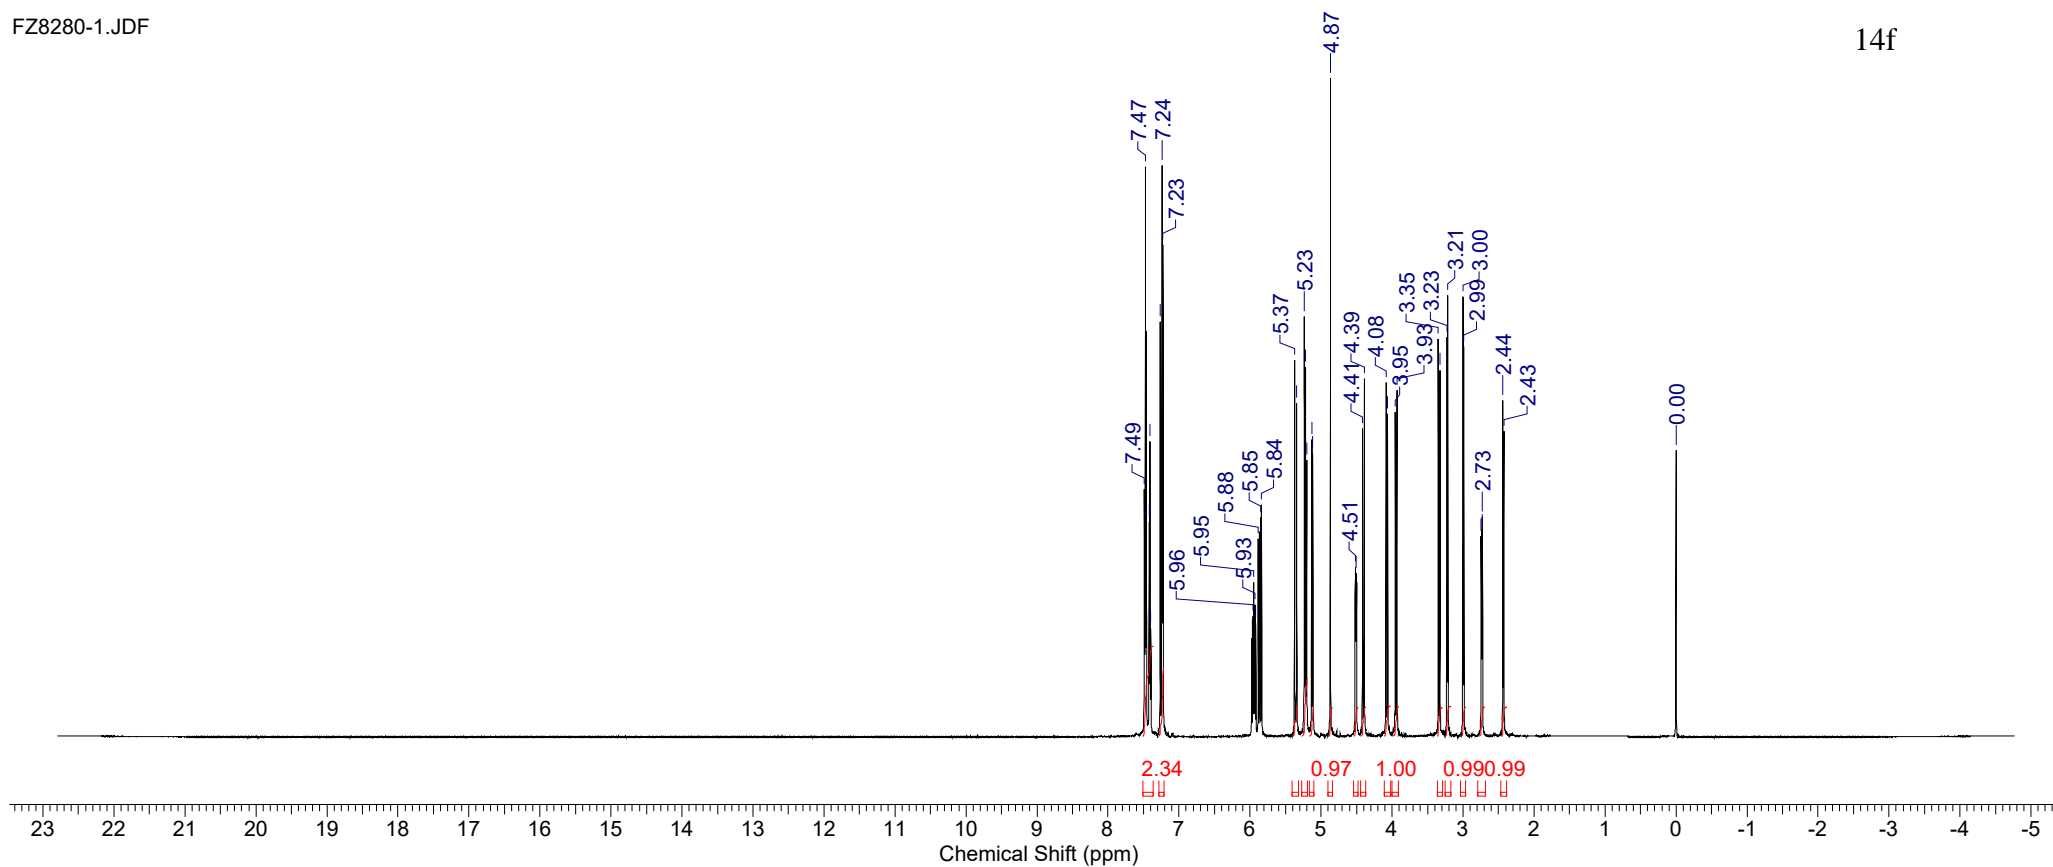

Formula C<sub>22</sub>H<sub>21</sub>NO<sub>5</sub> FW 379.4058

|                        |                      |                      |                                         |                        |                      |                       |              |
|------------------------|----------------------|----------------------|-----------------------------------------|------------------------|----------------------|-----------------------|--------------|
| Acquisition Time (sec) | 1.9818               | Comment              | single pulse                            | Date                   | 06 Oct 1990 03:11:15 | Frequency (MHz)       | 600.17       |
| Date Stamp             | 16 Dec 2019 08:28:05 | File Name            | C:\USERS\Лабa534\DOWNLOADS\FZ8280-1.JDF |                        |                      | Owner                 | delta        |
| Nucleus                | 1H                   | Number of Transients | 8                                       | Origin                 | ECA 600              | Original Points Count | 32768        |
| Points Count           | 32768                | Pulse Sequence       | single_pulse.ex2                        | Receiver Gain          | 40.00                | Solvent               | CHLOROFORM-d |
| Spectrum Offset (Hz)   | 5410.1226            | Sweep Width (Hz)     | 16534.39                                | Temperature (degree C) | 23.000               |                       |              |

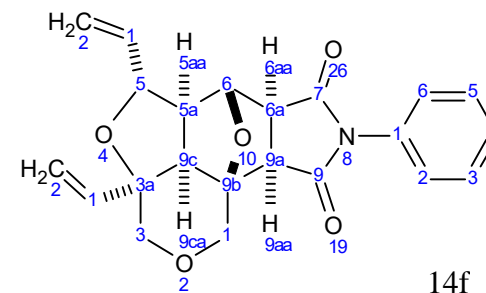

FZ8280-1.JDF

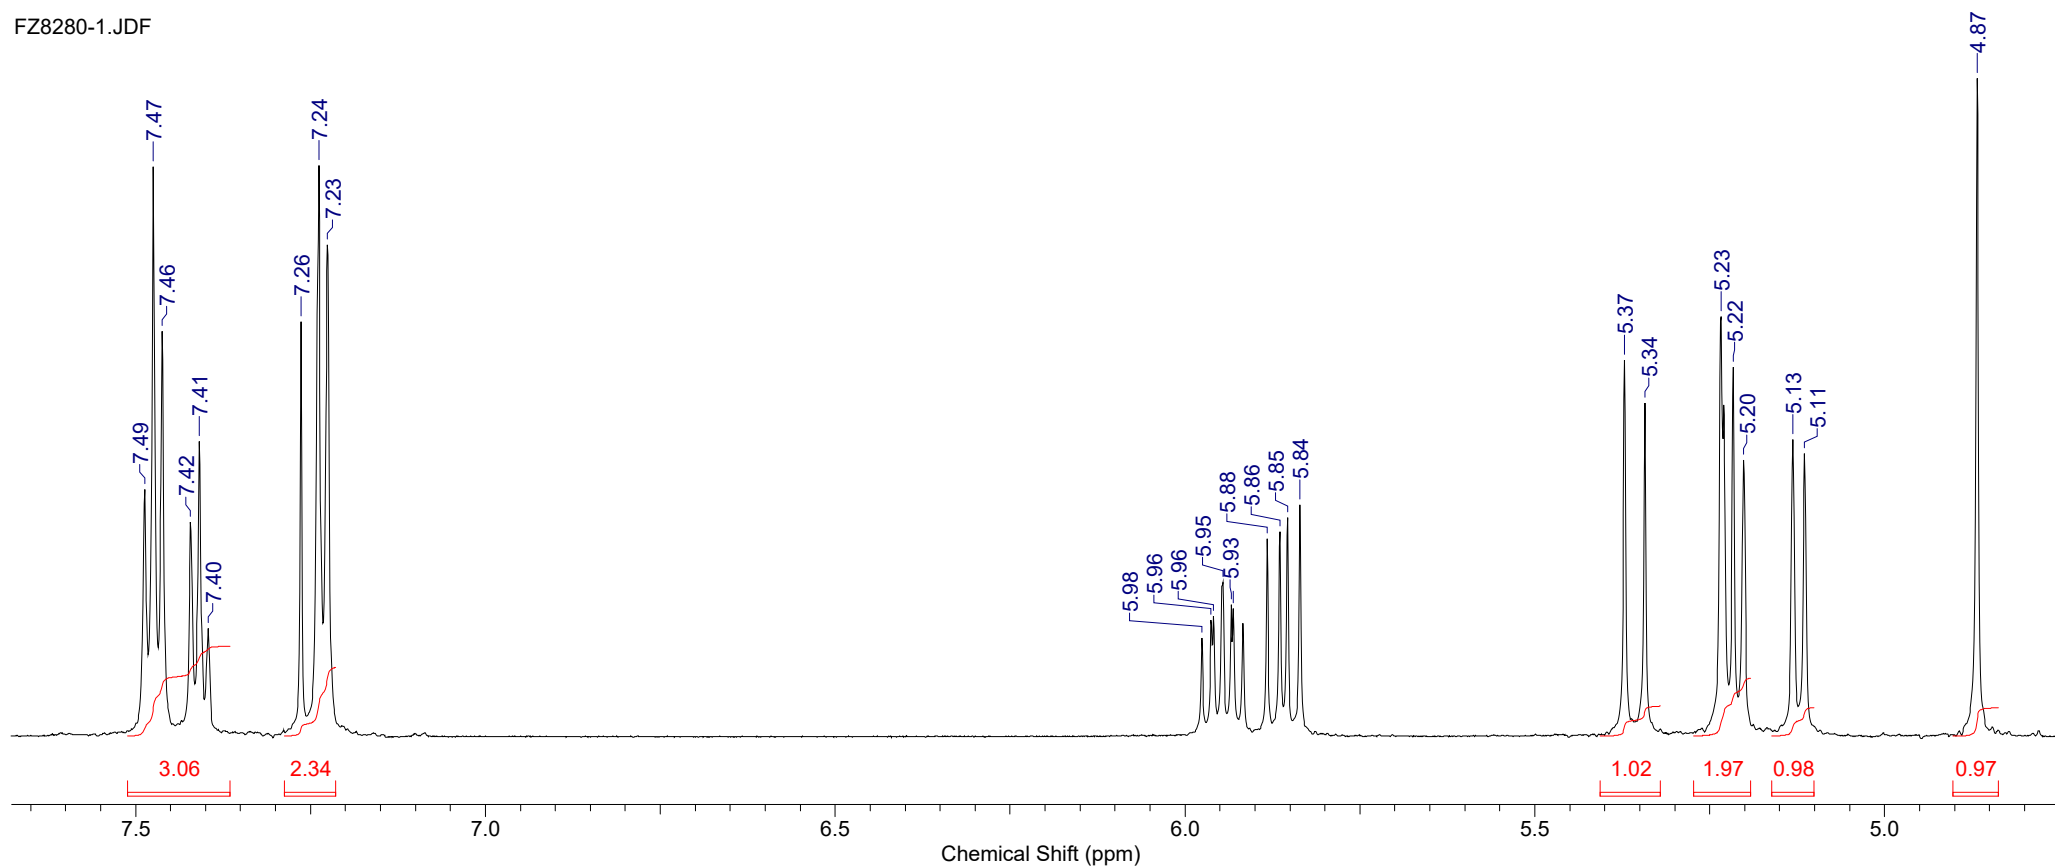

|                                                                |                    |
|----------------------------------------------------------------|--------------------|
| <b>Formula</b> C <sub>22</sub> H <sub>21</sub> NO <sub>5</sub> | <b>FW</b> 379.4058 |
|----------------------------------------------------------------|--------------------|

|                                        |                                                           |                                      |                               |
|----------------------------------------|-----------------------------------------------------------|--------------------------------------|-------------------------------|
| <b>Acquisition Time (sec)</b> 1.9818   | <b>Comment</b> single_pulse                               | <b>Date</b> 06 Oct 1990 03:11:15     | <b>Frequency (MHz)</b> 600.17 |
| <b>Date Stamp</b> 16 Dec 2019 08:28:05 | <b>File Name</b> C:\USERS\I\aba534\DOWNLOADS\FZ8280-1.JDF | <b>Original Points Count</b> 32768   | <b>Owner</b> delta            |
| <b>Nucleus</b> 1H                      | <b>Number of Transients</b> 8                             | <b>Origin</b> ECA 600                | <b>Receiver Gain</b> 40.00    |
| <b>Points Count</b> 32768              | <b>Pulse Sequence</b> single_pulse.ex2                    | <b>Temperature (degree C)</b> 23.000 | <b>Solvent</b> CHLOROFORM-d   |
| <b>Spectrum Offset (Hz)</b> 5410.1226  | <b>Sweep Width (Hz)</b> 16534.39                          |                                      |                               |

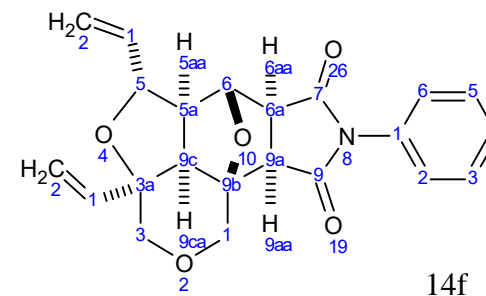

FZ8280-1.JDF

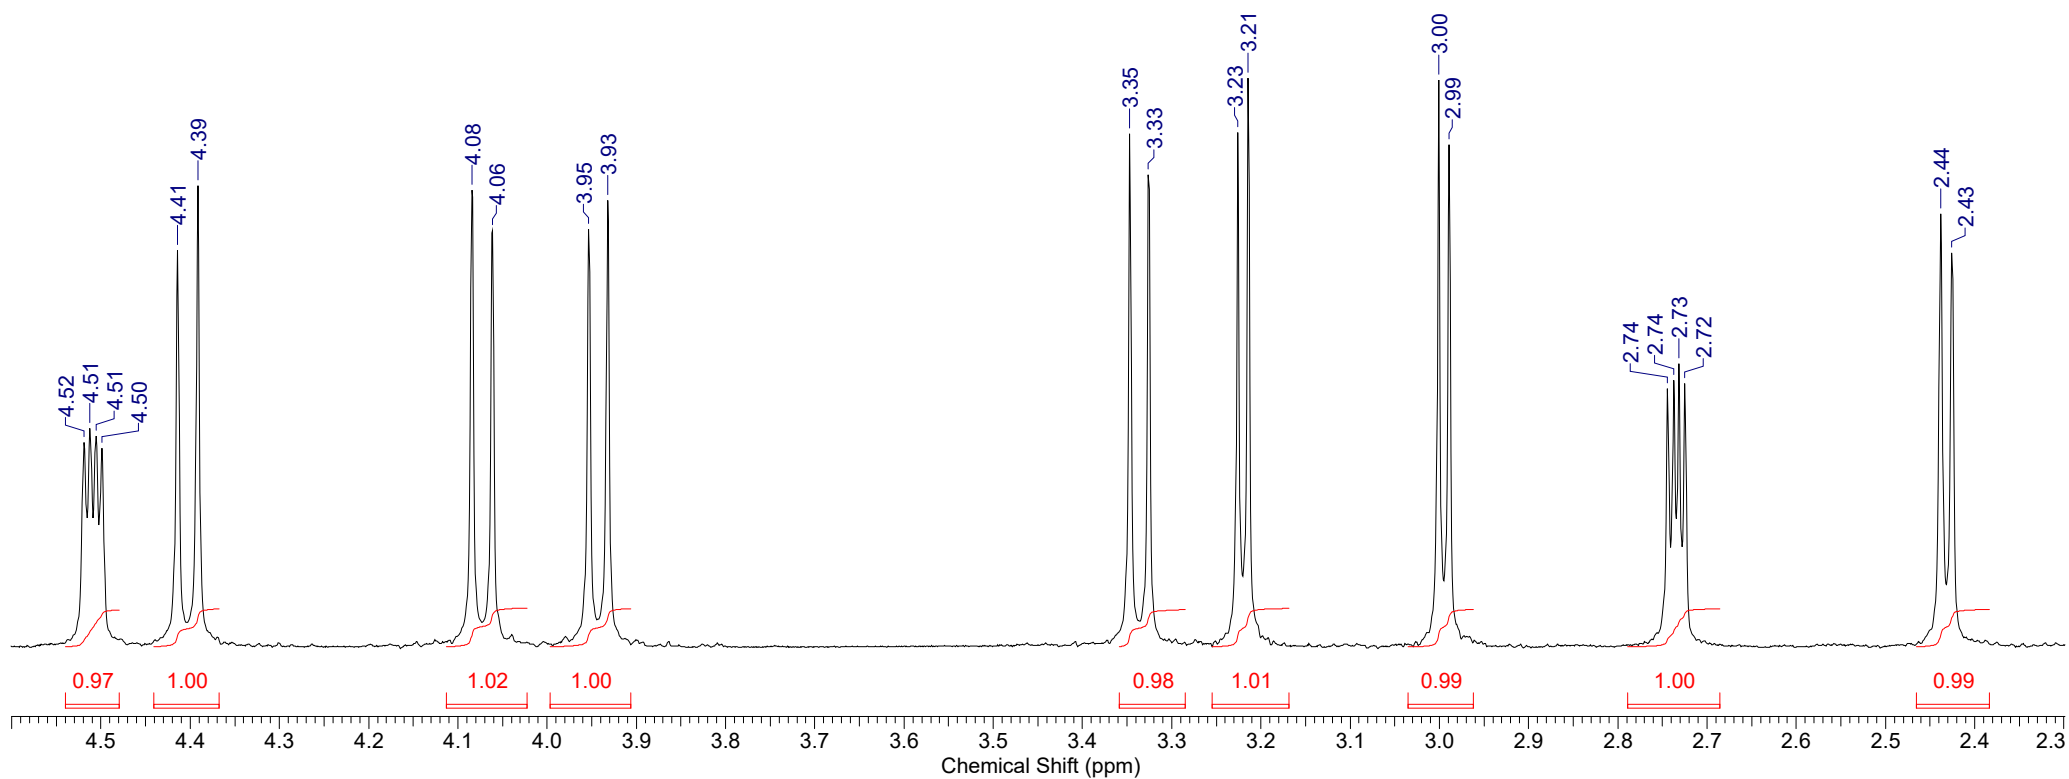

|                                                                |                    |
|----------------------------------------------------------------|--------------------|
| <b>Formula</b> C <sub>22</sub> H <sub>21</sub> NO <sub>5</sub> | <b>FW</b> 379.4058 |
|----------------------------------------------------------------|--------------------|

|                                        |                                                          |                                        |
|----------------------------------------|----------------------------------------------------------|----------------------------------------|
| <b>Acquisition Time (sec)</b> 0.6921   | <b>Comment</b> single pulse decoupled gated NOE          | <b>Date</b> 10 Oct 1990 04:12:47       |
| <b>Date Stamp</b> 20 Dec 2019 09:29:41 | <b>File Name</b> C:\USERS\Ta6a534\DOWNLOADS\FZ8306-1.JDF |                                        |
| <b>Frequency (MHz)</b> 150.91          | <b>Nucleus</b> 13C                                       | <b>Number of Transients</b> 1000       |
| <b>Original Points Count</b> 32768     | <b>Owner</b> delta                                       | <b>Points Count</b> 32768              |
| <b>Receiver Gain</b> 58.00             | <b>Solvent</b> DMSO-d6                                   | <b>Spectrum Offset (Hz)</b> 14994.0977 |
| <b>Temperature (degree C)</b> 24.400   |                                                          | <b>Sweep Width (Hz)</b> 47348.49       |

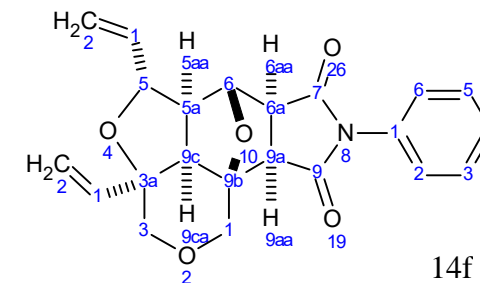

FZ8306-1.JDF

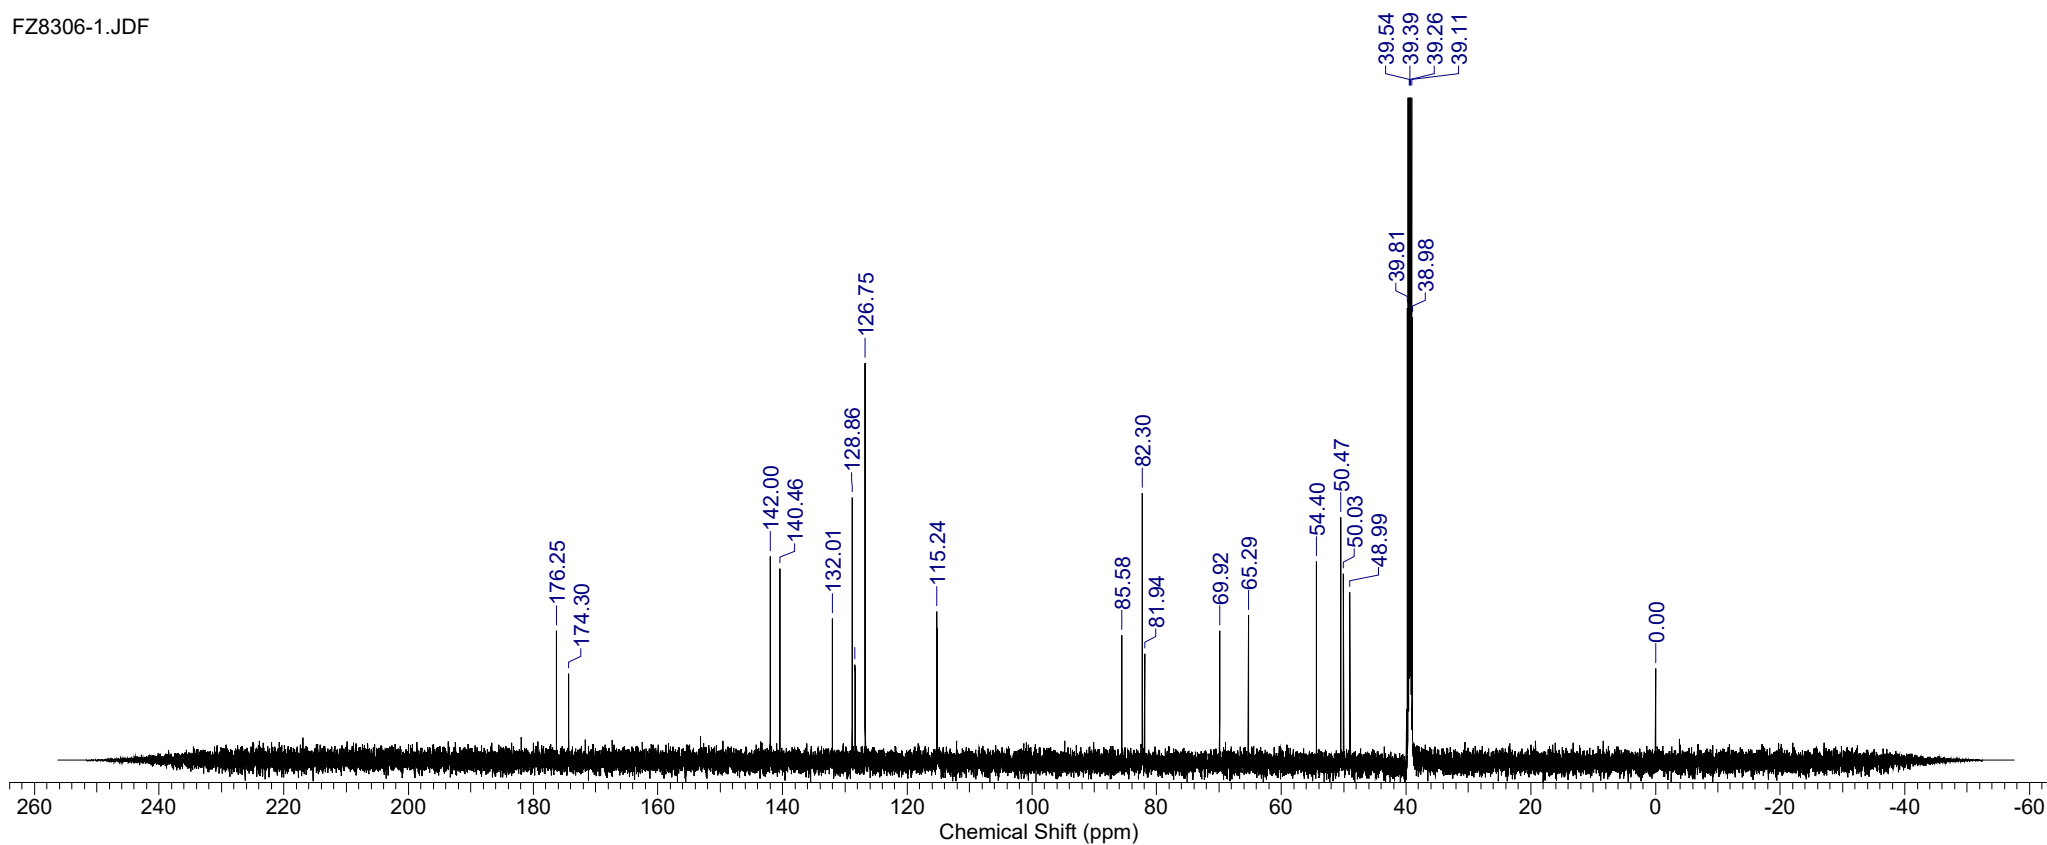

|                                                                |                    |
|----------------------------------------------------------------|--------------------|
| <b>Formula</b> C <sub>22</sub> H <sub>21</sub> NO <sub>5</sub> | <b>FW</b> 379.4058 |
|----------------------------------------------------------------|--------------------|

|                                        |                                                           |                                        |
|----------------------------------------|-----------------------------------------------------------|----------------------------------------|
| <b>Acquisition Time (sec)</b> 0.6921   | <b>Comment</b> single pulse decoupled gated NOE           | <b>Date</b> 10 Oct 1990 04:12:47       |
| <b>Date Stamp</b> 20 Dec 2019 09:29:41 | <b>File Name</b> C:\USERS\lta6a534\DOWNLOADS\FZ8306-1.JDF |                                        |
| <b>Frequency (MHz)</b> 150.91          | <b>Nucleus</b> 13C                                        | <b>Number of Transients</b> 1000       |
| <b>Original Points Count</b> 32768     | <b>Owner</b> delta                                        | <b>Points Count</b> 32768              |
| <b>Receiver Gain</b> 58.00             | <b>Solvent</b> DMSO-d6                                    | <b>Pulse Sequence</b> single pulse dec |
| <b>Temperature (degree C)</b> 24.400   | <b>Spectrum Offset (Hz)</b> 14994.0977                    | <b>Sweep Width (Hz)</b> 47348.49       |

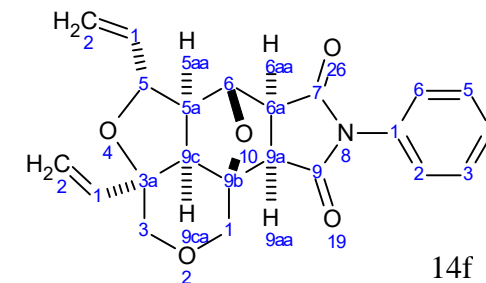

FZ8306-1.JDF

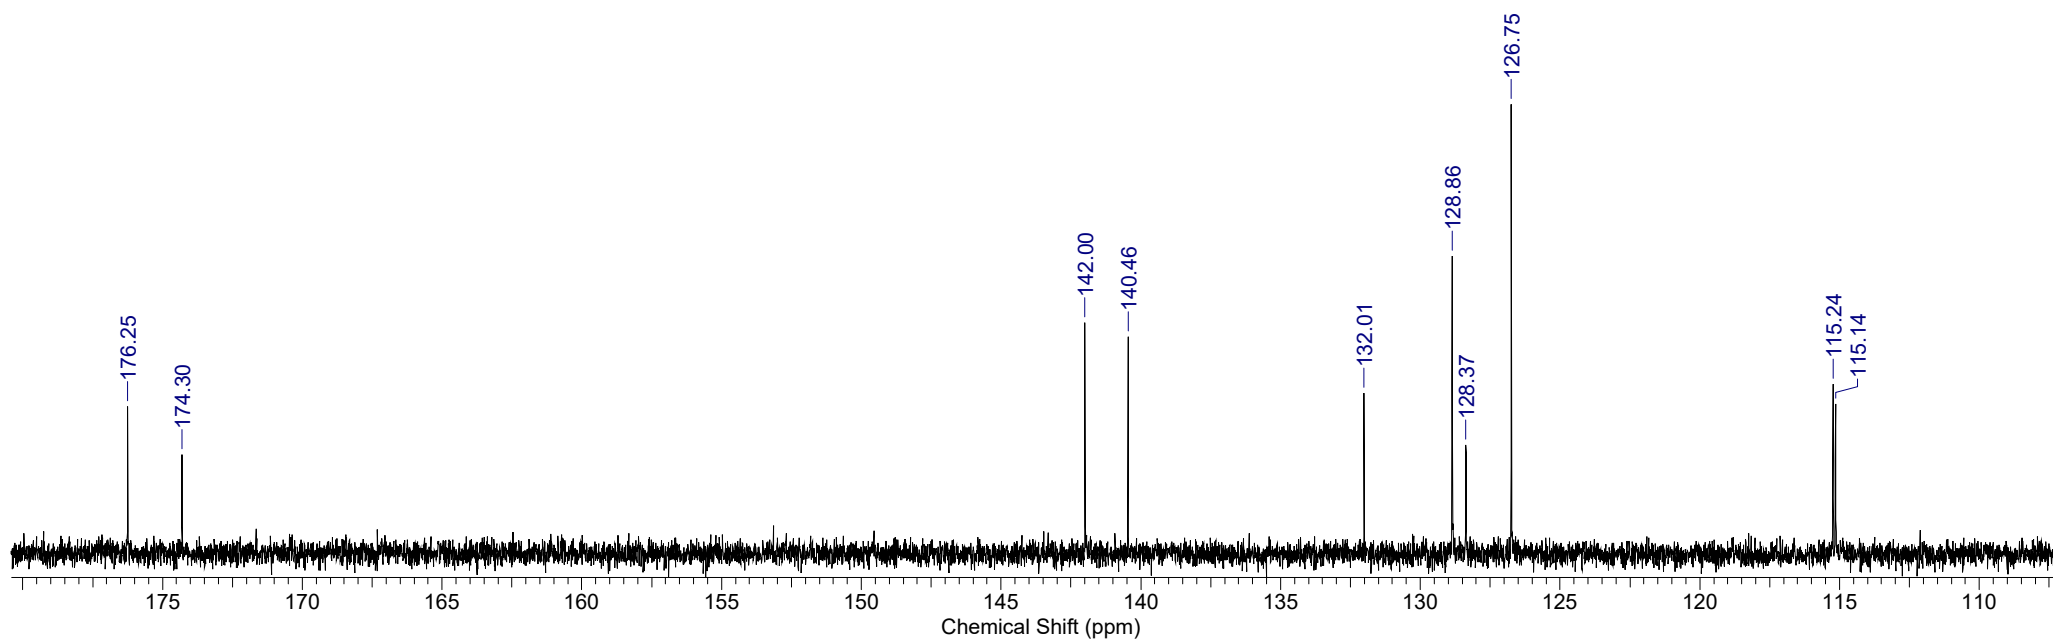



|                                                                |                    |
|----------------------------------------------------------------|--------------------|
| <b>Formula</b> C <sub>22</sub> H <sub>21</sub> NO <sub>5</sub> | <b>FW</b> 379.4058 |
|----------------------------------------------------------------|--------------------|

|                                        |                                                           |                                        |
|----------------------------------------|-----------------------------------------------------------|----------------------------------------|
| <b>Acquisition Time (sec)</b> 0.6921   | <b>Comment</b> single pulse decoupled gated NOE           | <b>Date</b> 10 Oct 1990 04:12:47       |
| <b>Date Stamp</b> 20 Dec 2019 09:29:41 | <b>File Name</b> C:\USERS\lta6a534\DOWNLOADS\FZ8306-1.JDF |                                        |
| <b>Frequency (MHz)</b> 150.91          | <b>Nucleus</b> 13C                                        | <b>Number of Transients</b> 1000       |
| <b>Original Points Count</b> 32768     | <b>Owner</b> delta                                        | <b>Origin</b> ECA 600                  |
| <b>Receiver Gain</b> 58.00             | <b>Solvent</b> DMSO-d6                                    | <b>Points Count</b> 32768              |
|                                        | <b>Spectrum Offset (Hz)</b> 14994.0977                    | <b>Pulse Sequence</b> single pulse dec |
| <b>Temperature (degree C)</b> 24.400   |                                                           | <b>Sweep Width (Hz)</b> 47348.49       |

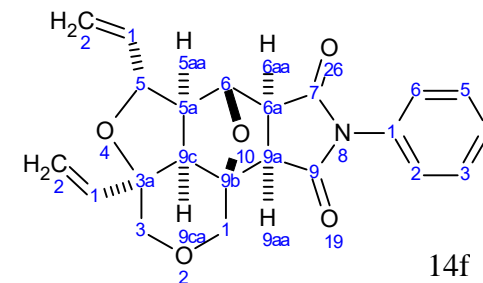

FZ8306-1.JDF

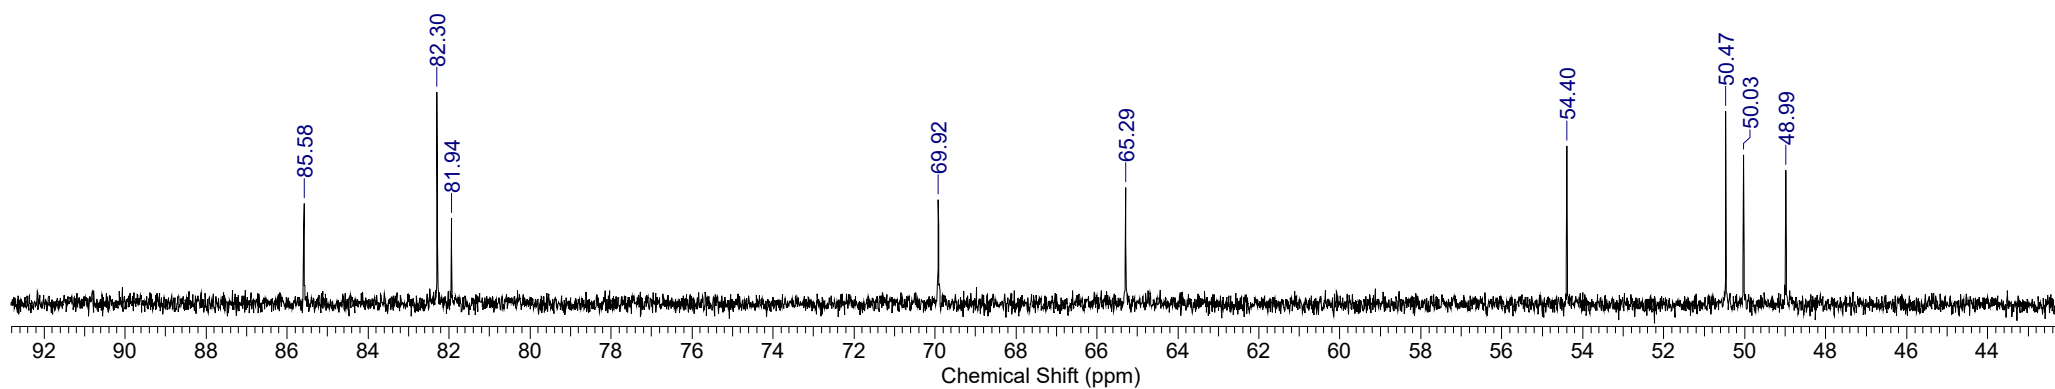

|                                                                  |                    |
|------------------------------------------------------------------|--------------------|
| <b>Formula</b> C <sub>22</sub> H <sub>21</sub> NO <sub>4</sub> S | <b>FW</b> 395.4714 |
|------------------------------------------------------------------|--------------------|

|                                                       |                                    |                                       |                                        |
|-------------------------------------------------------|------------------------------------|---------------------------------------|----------------------------------------|
| <b>Acquisition Time (sec)</b> 1.9818                  | <b>Comment</b> single_pulse        | <b>Date</b> 11 Aug 2020 08:17:30      | <b>Date Stamp</b> 11 Aug 2020 08:18:21 |
| <b>File Name</b> C:\USERS\LIZA\DOWNLOADS\FZ8971-1.JDF | <b>Frequency (MHz)</b> 600.17      | <b>Nucleus</b> 1H                     | <b>Number of Transients</b> 8          |
| <b>Origin</b> ECA 600                                 | <b>Original Points Count</b> 32768 | <b>Owner</b> CKP                      | <b>Pulse Sequence</b> single_pulse.ex2 |
| <b>Receiver Gain</b> 42.00                            | <b>Solvent</b> CHLOROFORM-d        | <b>Spectrum Offset (Hz)</b> 5410.1226 | <b>Sweep Width (Hz)</b> 16534.39       |

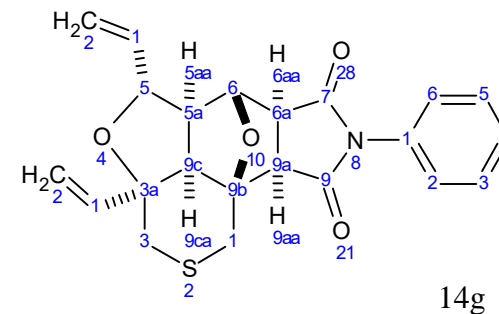

FZ8971-1. PK-2105ESP.ESP

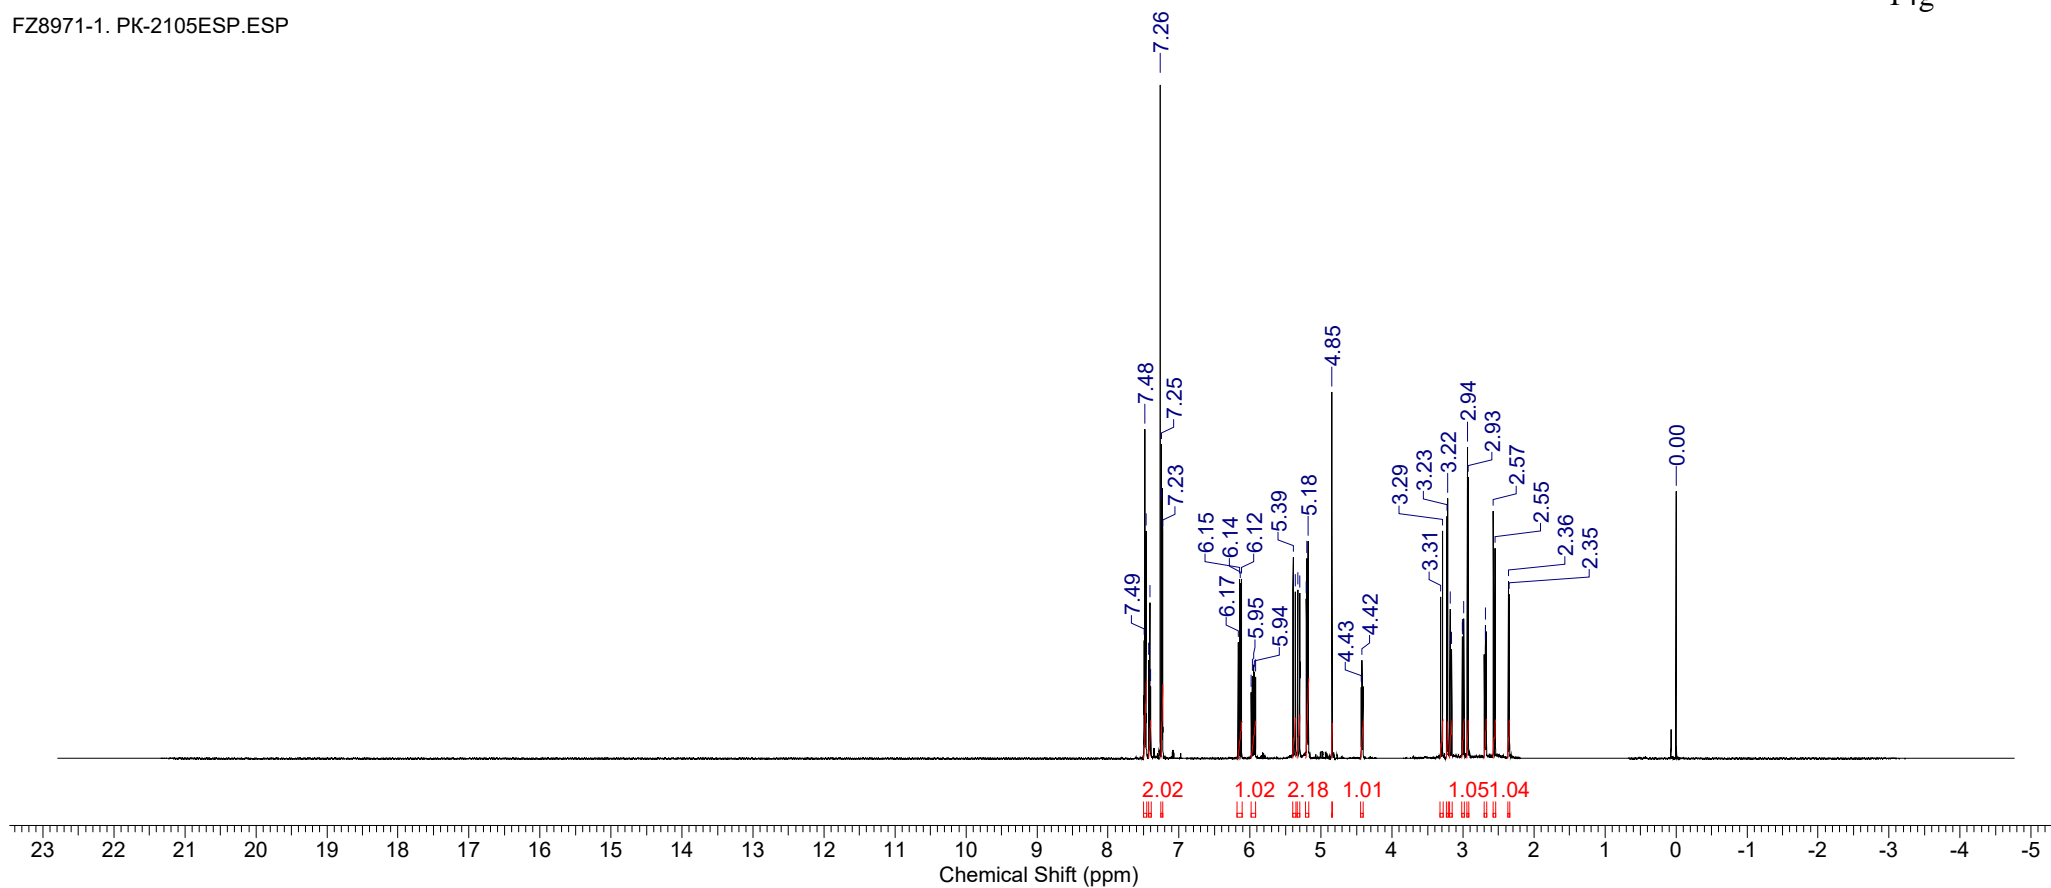

**Formula** C<sub>22</sub>H<sub>21</sub>NO<sub>4</sub>S **FW** 395.4714

|                               |                                      |                              |              |                             |                      |                             |                      |
|-------------------------------|--------------------------------------|------------------------------|--------------|-----------------------------|----------------------|-----------------------------|----------------------|
| <b>Acquisition Time (sec)</b> | 1.9818                               | <b>Comment</b>               | single_pulse | <b>Date</b>                 | 11 Aug 2020 08:17:30 | <b>Date Stamp</b>           | 11 Aug 2020 08:18:21 |
| <b>File Name</b>              | C:\USERS\LIZA\DOWNLOADS\FZ8971-1.JDF | <b>Frequency (MHz)</b>       | 600.17       | <b>Nucleus</b>              | 1H                   | <b>Number of Transients</b> | 8                    |
| <b>Origin</b>                 | ECA 600                              | <b>Original Points Count</b> | 32768        | <b>Owner</b>                | CKP                  | <b>Pulse Sequence</b>       | single_pulse.ex2     |
| <b>Receiver Gain</b>          | 42.00                                | <b>Solvent</b>               | CHLOROFORM-d | <b>Spectrum Offset (Hz)</b> | 5410.1226            | <b>Sweep Width (Hz)</b>     | 16534.39             |

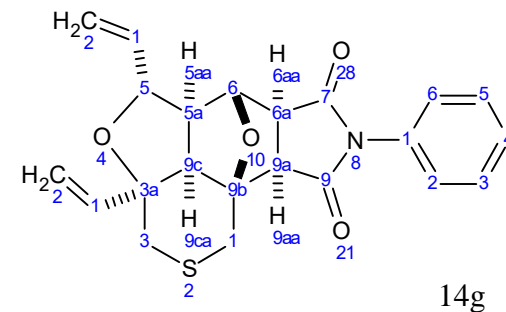

FZ8971-1. PK-2105ESP.ESP

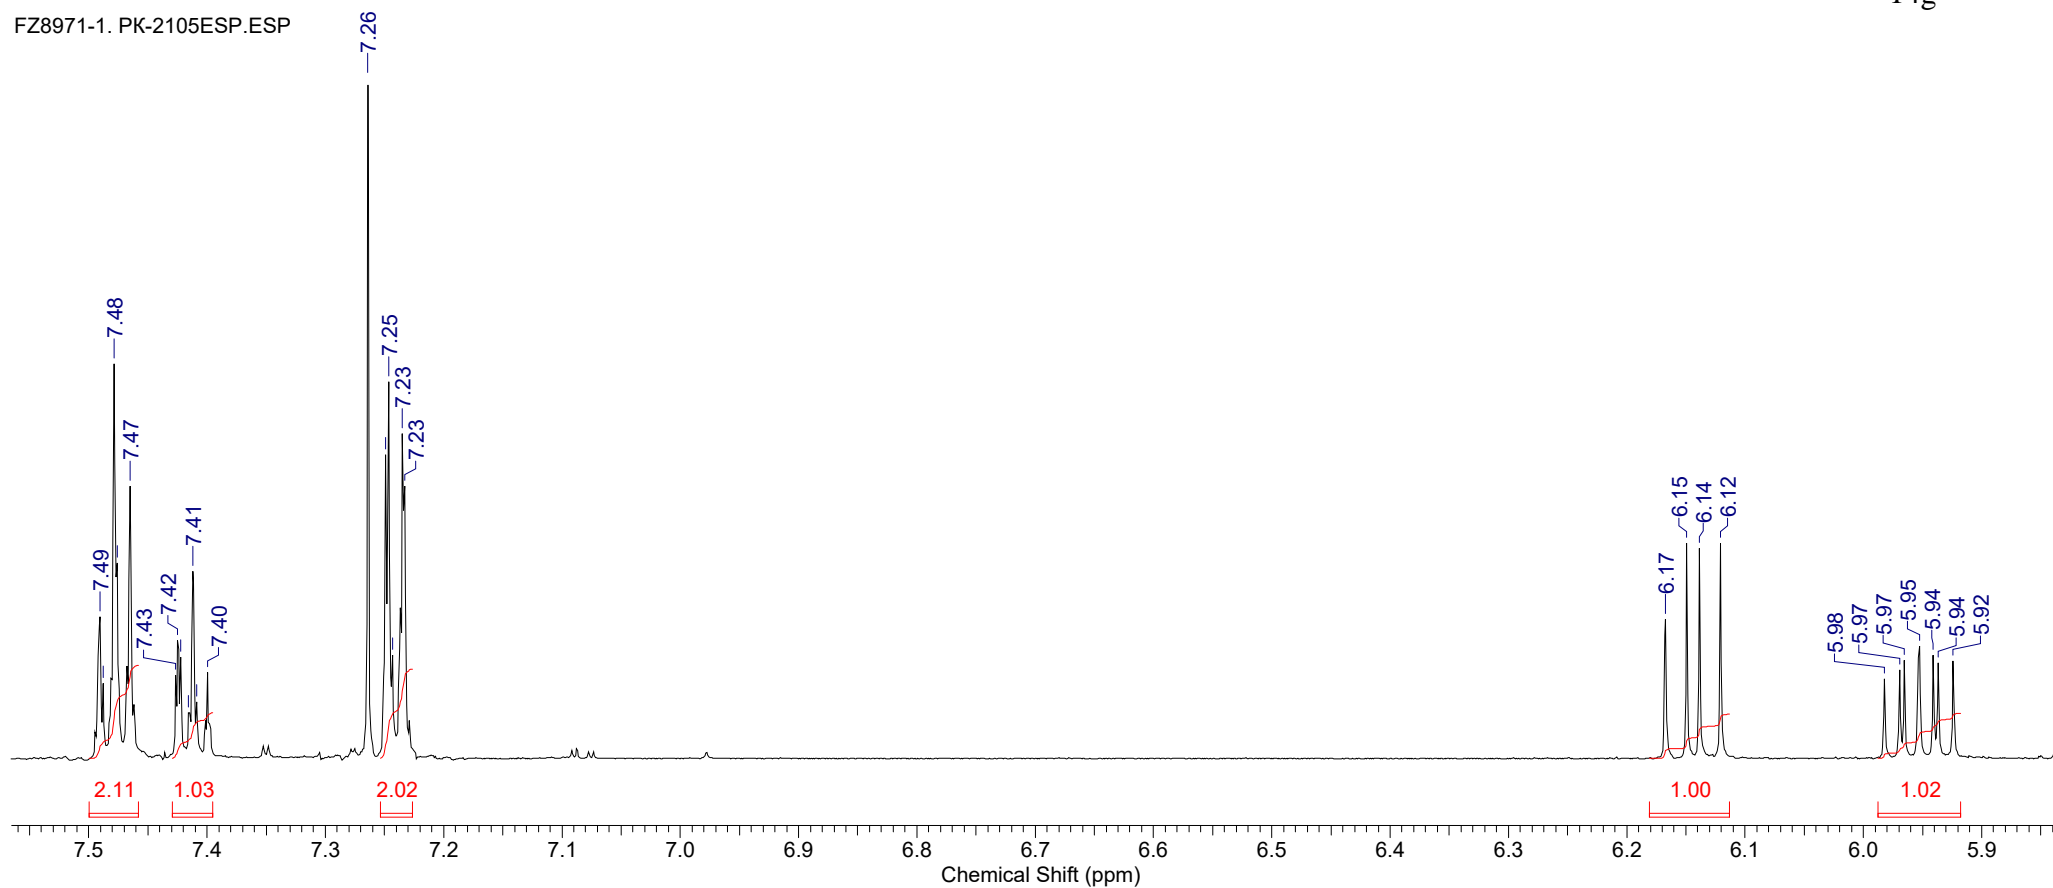

|                                                                  |                    |
|------------------------------------------------------------------|--------------------|
| <b>Formula</b> C <sub>22</sub> H <sub>21</sub> NO <sub>4</sub> S | <b>FW</b> 395.4714 |
|------------------------------------------------------------------|--------------------|

|                                                       |                                    |                                       |                                        |
|-------------------------------------------------------|------------------------------------|---------------------------------------|----------------------------------------|
| <b>Acquisition Time (sec)</b> 1.9818                  | <b>Comment</b> single_pulse        | <b>Date</b> 11 Aug 2020 08:17:30      | <b>Date Stamp</b> 11 Aug 2020 08:18:21 |
| <b>File Name</b> C:\USERS\LIZA\DOWNLOADS\FZ8971-1.JDF | <b>Frequency (MHz)</b> 600.17      | <b>Nucleus</b> 1H                     | <b>Number of Transients</b> 8          |
| <b>Origin</b> ECA 600                                 | <b>Original Points Count</b> 32768 | <b>Owner</b> CKP                      | <b>Pulse Sequence</b> single_pulse.ex2 |
| <b>Receiver Gain</b> 42.00                            | <b>Solvent</b> CHLOROFORM-d        | <b>Spectrum Offset (Hz)</b> 5410.1226 | <b>Sweep Width (Hz)</b> 16534.39       |

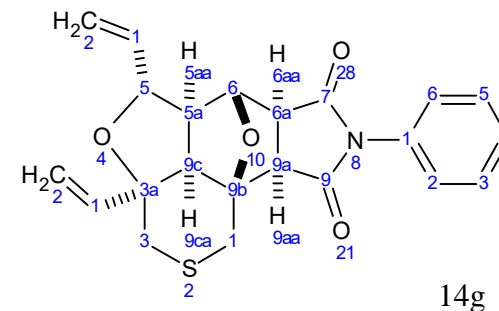

FZ8971-1. PK-2105ESP.ESP

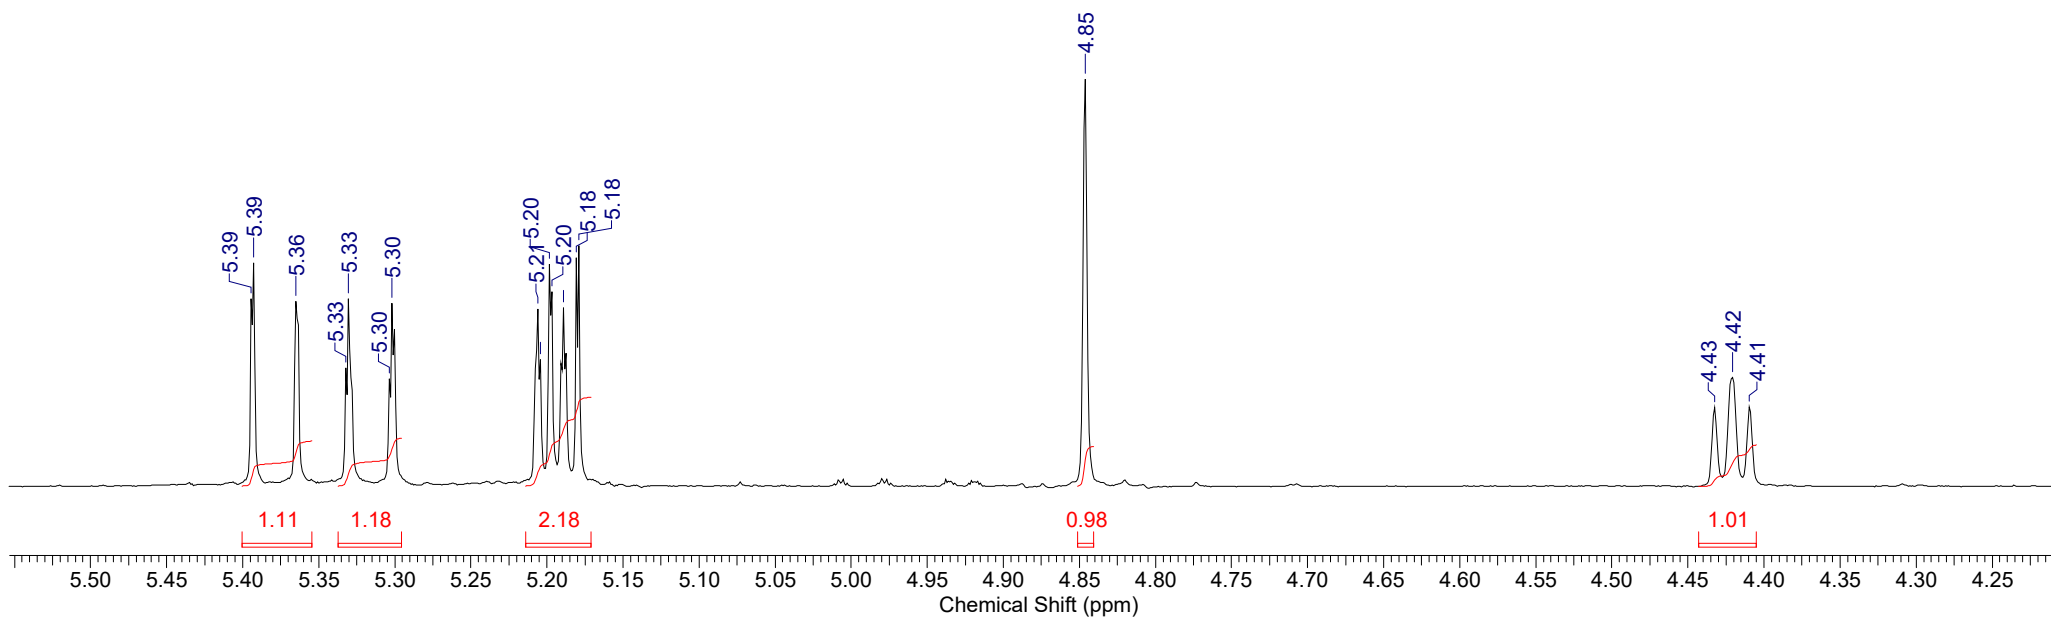

|                                                                  |                    |
|------------------------------------------------------------------|--------------------|
| <b>Formula</b> C <sub>22</sub> H <sub>21</sub> NO <sub>4</sub> S | <b>FW</b> 395.4714 |
|------------------------------------------------------------------|--------------------|

|                                                       |                                    |                                       |                                        |
|-------------------------------------------------------|------------------------------------|---------------------------------------|----------------------------------------|
| <b>Acquisition Time (sec)</b> 1.9818                  | <b>Comment</b> single_pulse        | <b>Date</b> 11 Aug 2020 08:17:30      | <b>Date Stamp</b> 11 Aug 2020 08:18:21 |
| <b>File Name</b> C:\USERS\LIZA\DOWNLOADS\FZ8971-1.JDF | <b>Frequency (MHz)</b> 600.17      | <b>Nucleus</b> 1H                     | <b>Number of Transients</b> 8          |
| <b>Origin</b> ECA 600                                 | <b>Original Points Count</b> 32768 | <b>Owner</b> CKP                      | <b>Pulse Sequence</b> single_pulse.ex2 |
| <b>Receiver Gain</b> 42.00                            | <b>Solvent</b> CHLOROFORM-d        | <b>Spectrum Offset (Hz)</b> 5410.1226 | <b>Sweep Width (Hz)</b> 16534.39       |



FZ8971-1. PK-2105ESP.ESP

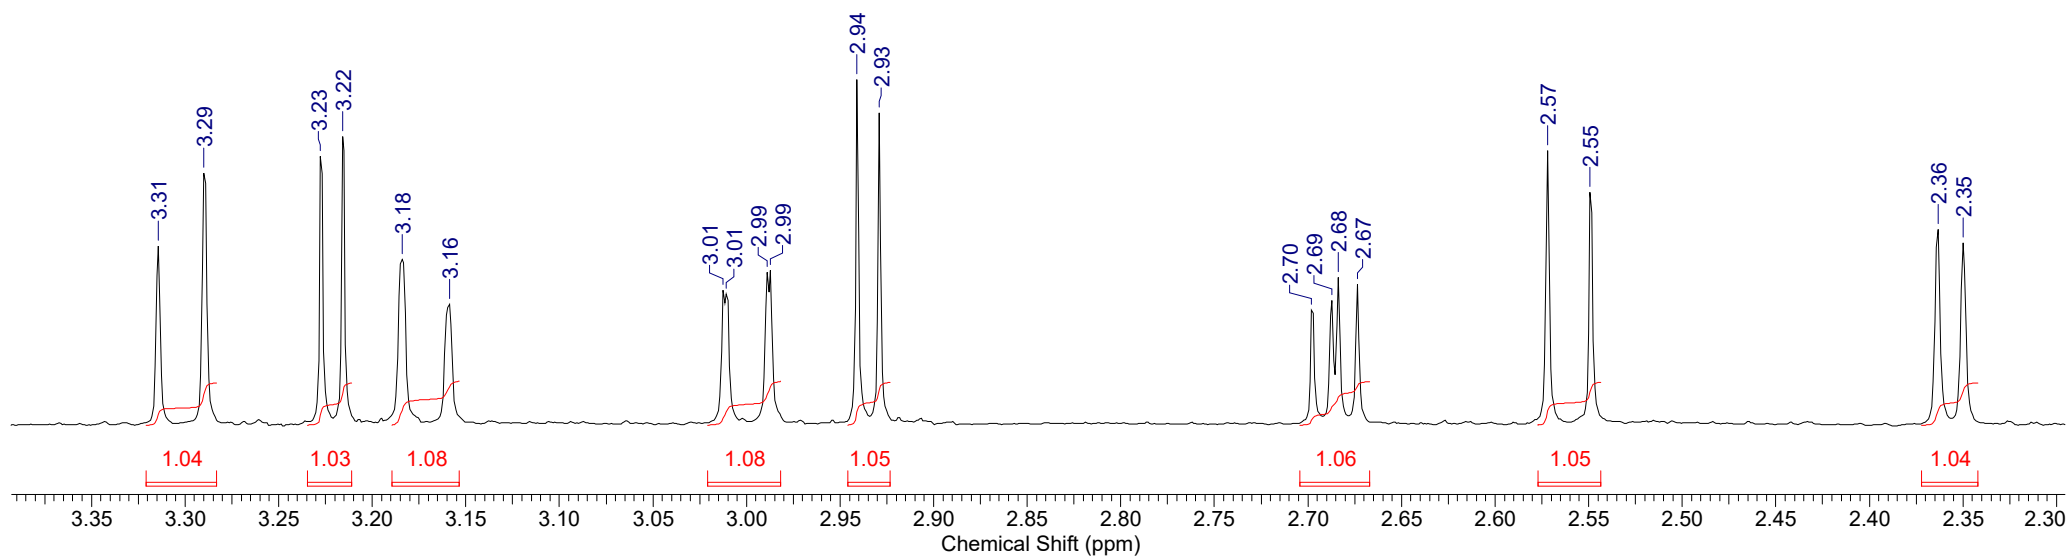

|                                                                  |                    |
|------------------------------------------------------------------|--------------------|
| <b>Formula</b> C <sub>22</sub> H <sub>21</sub> NO <sub>4</sub> S | <b>FW</b> 395.4714 |
|------------------------------------------------------------------|--------------------|

|                                        |                                                           |                                        |
|----------------------------------------|-----------------------------------------------------------|----------------------------------------|
| <b>Acquisition Time (sec)</b> 0.6921   | <b>Comment</b> single pulse decoupled gated NOE           | <b>Date</b> 14 Aug 2020 13:21:00       |
| <b>Date Stamp</b> 14 Aug 2020 13:21:57 | <b>File Name</b> C:\USERS\l1a6a534\DOWNLOADS\FZ8986-1.JDF |                                        |
| <b>Frequency (MHz)</b> 150.91          | <b>Nucleus</b> 13C                                        | <b>Number of Transients</b> 2231       |
| <b>Original Points Count</b> 32768     | <b>Owner</b> CKP                                          | <b>Points Count</b> 32768              |
| <b>Receiver Gain</b> 56.00             | <b>Solvent</b> CHLOROFORM-d                               | <b>Pulse Sequence</b> single pulse dec |
| <b>Sweep Width (Hz)</b> 47348.49       |                                                           | <b>Spectrum Offset (Hz)</b> 15079.3525 |

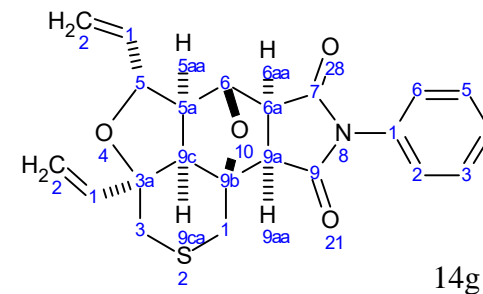

FZ8986-1.JDF

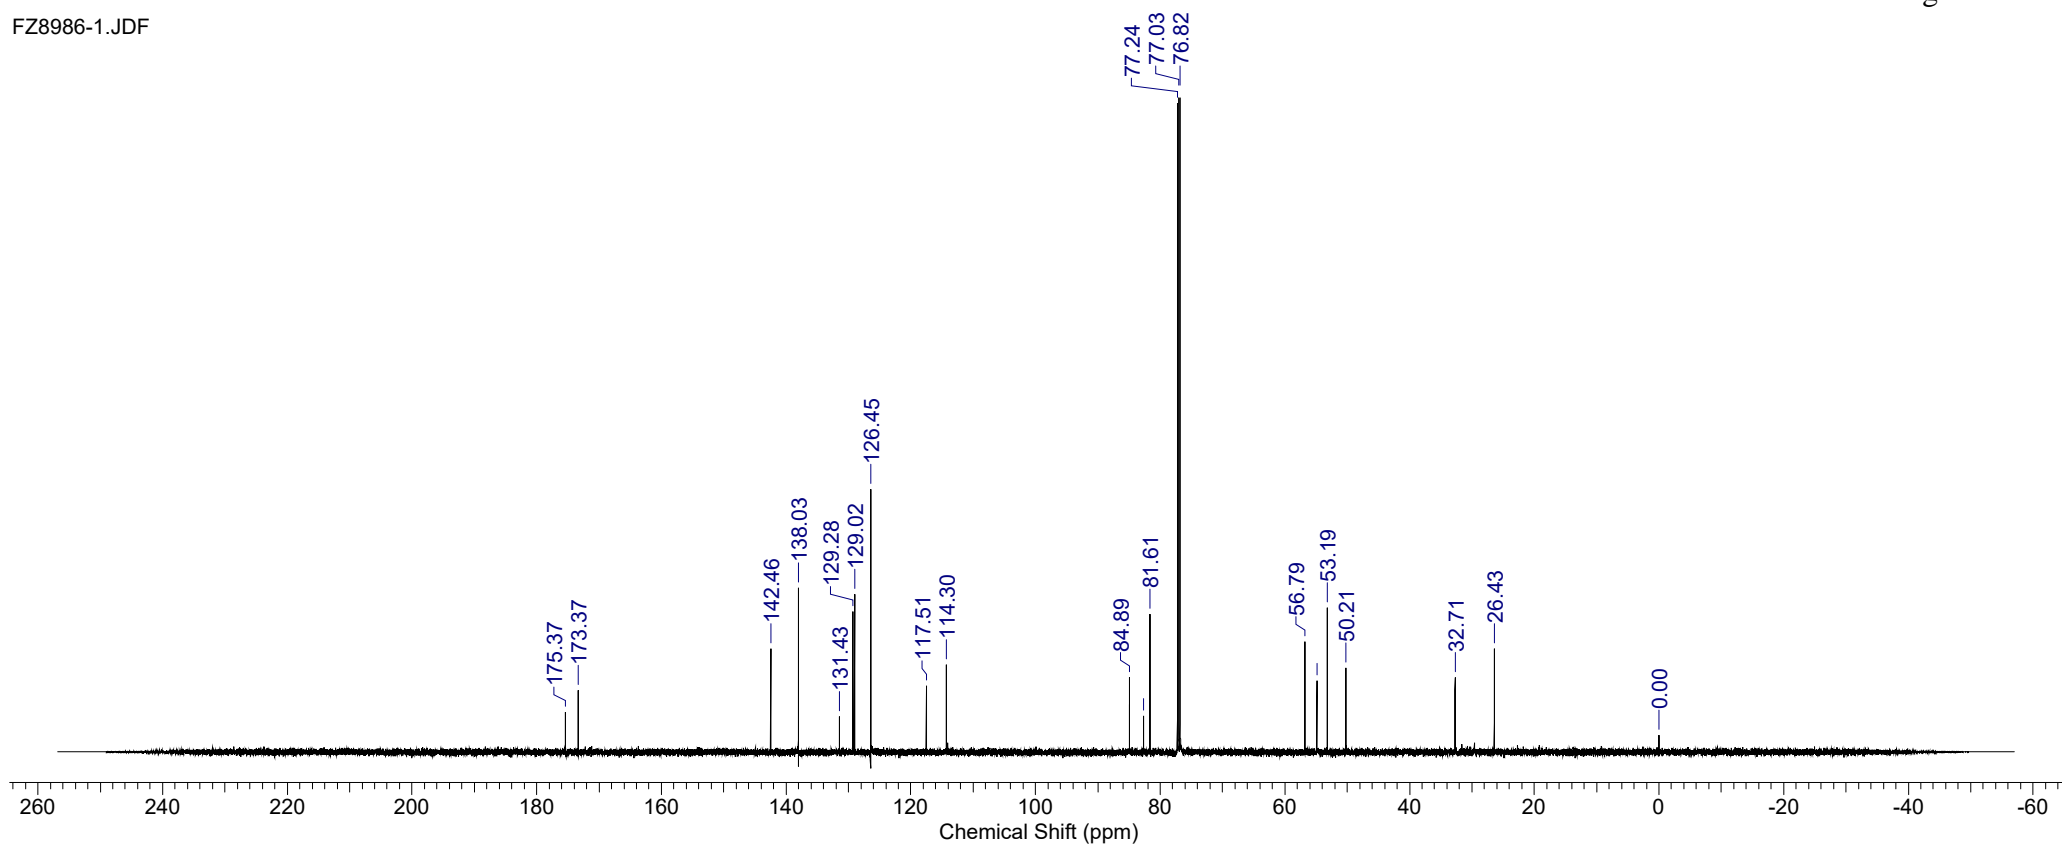

|                                                                  |                    |
|------------------------------------------------------------------|--------------------|
| <b>Formula</b> C <sub>22</sub> H <sub>21</sub> NO <sub>4</sub> S | <b>FW</b> 395.4714 |
|------------------------------------------------------------------|--------------------|

|                                        |                                                          |                                        |
|----------------------------------------|----------------------------------------------------------|----------------------------------------|
| <b>Acquisition Time (sec)</b> 0.6921   | <b>Comment</b> single pulse decoupled gated NOE          | <b>Date</b> 14 Aug 2020 13:21:00       |
| <b>Date Stamp</b> 14 Aug 2020 13:21:57 | <b>File Name</b> C:\USERS\la6a534\DOWNLOADS\FZ8986-1.JDF |                                        |
| <b>Frequency (MHz)</b> 150.91          | <b>Nucleus</b> 13C                                       | <b>Number of Transients</b> 2231       |
| <b>Original Points Count</b> 32768     | <b>Owner</b> CKP                                         | <b>Points Count</b> 32768              |
| <b>Receiver Gain</b> 56.00             | <b>Solvent</b> CHLOROFORM-d                              | <b>Pulse Sequence</b> single pulse dec |
| <b>Sweep Width (Hz)</b> 47348.49       |                                                          | <b>Spectrum Offset (Hz)</b> 15079.3525 |



FZ8986-1.JDF

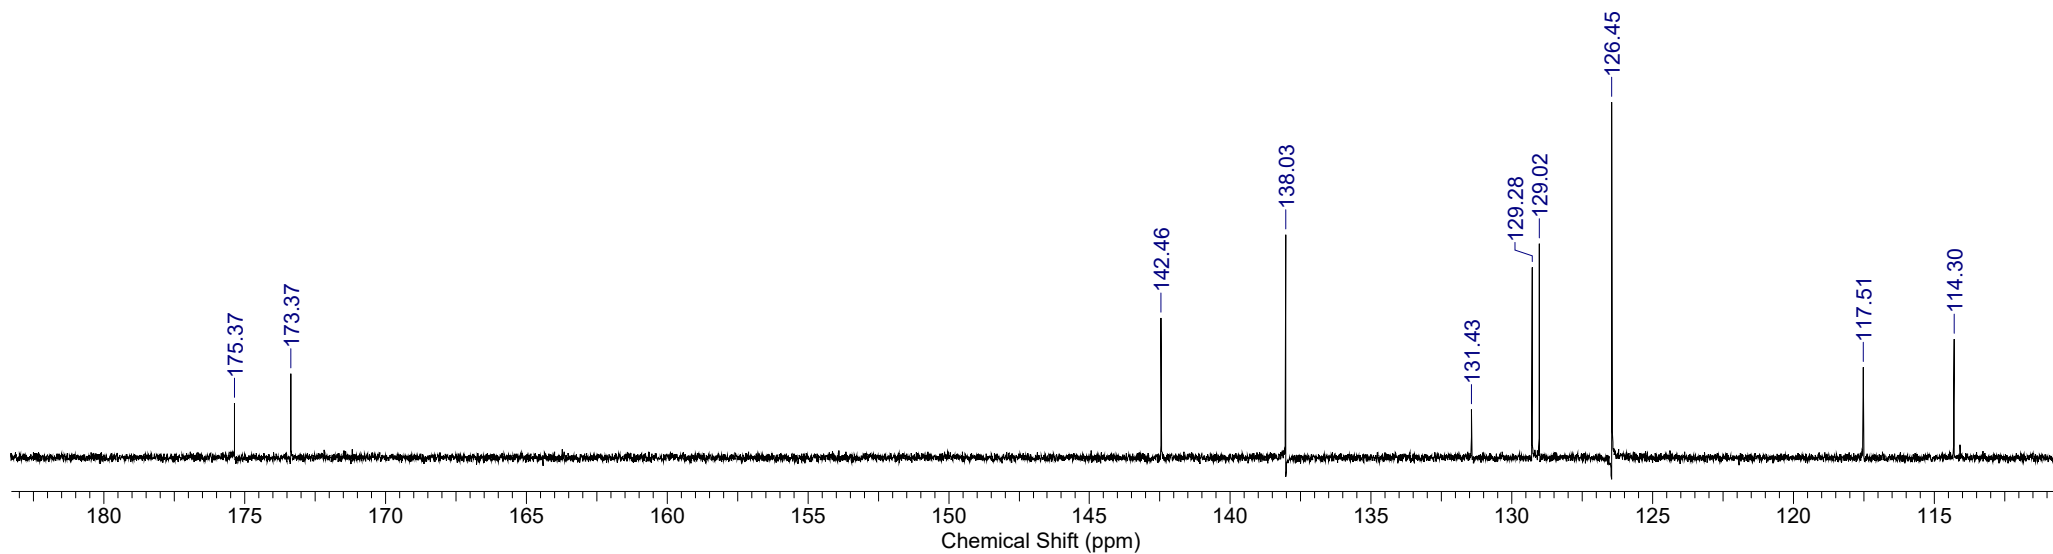

|                                                                  |                    |
|------------------------------------------------------------------|--------------------|
| <b>Formula</b> C <sub>22</sub> H <sub>21</sub> NO <sub>4</sub> S | <b>FW</b> 395.4714 |
|------------------------------------------------------------------|--------------------|

|                                        |                                                           |                                        |
|----------------------------------------|-----------------------------------------------------------|----------------------------------------|
| <b>Acquisition Time (sec)</b> 0.6921   | <b>Comment</b> single pulse decoupled gated NOE           | <b>Date</b> 14 Aug 2020 13:21:00       |
| <b>Date Stamp</b> 14 Aug 2020 13:21:57 | <b>File Name</b> C:\USERS\l1a6a534\DOWNLOADS\FZ8986-1.JDF |                                        |
| <b>Frequency (MHz)</b> 150.91          | <b>Nucleus</b> 13C                                        | <b>Number of Transients</b> 2231       |
| <b>Original Points Count</b> 32768     | <b>Owner</b> CKP                                          | <b>Points Count</b> 32768              |
| <b>Receiver Gain</b> 56.00             | <b>Solvent</b> CHLOROFORM-d                               | <b>Pulse Sequence</b> single pulse dec |
| <b>Sweep Width (Hz)</b> 47348.49       |                                                           | <b>Spectrum Offset (Hz)</b> 15079.3525 |

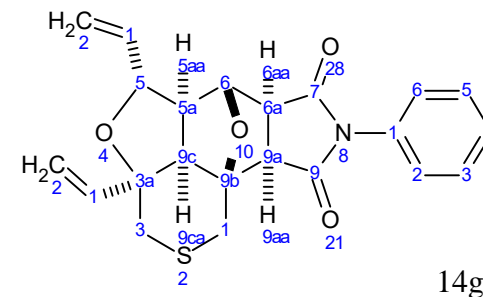

FZ8986-1.JDF

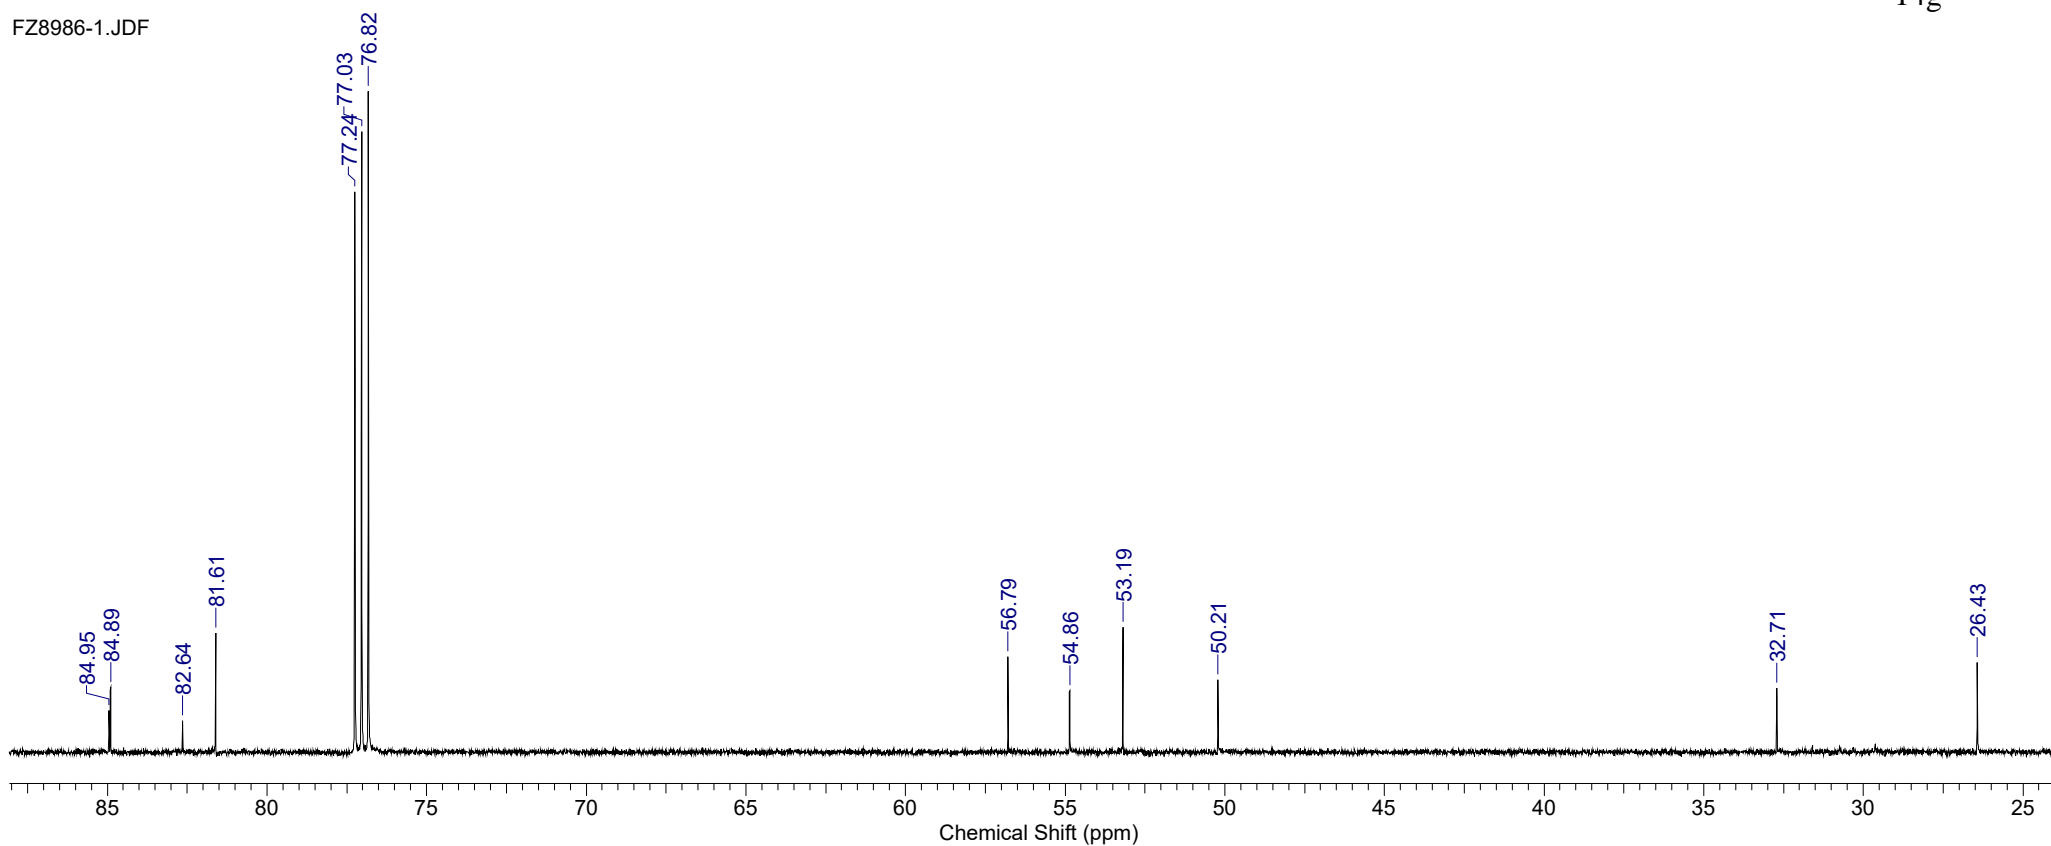



|                                                                  |                    |
|------------------------------------------------------------------|--------------------|
| <b>Formula</b> C <sub>22</sub> H <sub>21</sub> NO <sub>6</sub> S | <b>FW</b> 427.4702 |
|------------------------------------------------------------------|--------------------|

|                                                          |                                    |                                       |                                        |
|----------------------------------------------------------|------------------------------------|---------------------------------------|----------------------------------------|
| <b>Acquisition Time (sec)</b> 1.9818                     | <b>Comment</b> single_pulse        | <b>Date</b> 29 Jul 2020 10:26:15      | <b>Date Stamp</b> 29 Jul 2020 10:27:29 |
| <b>File Name</b> C:\USERS\Лабa534\DOWNLOADS\FZ8906-1.JDF | <b>Frequency (MHz)</b> 600.17      | <b>Nucleus</b> 1H                     | <b>Number of Transients</b> 8          |
| <b>Origin</b> ECA 600                                    | <b>Original Points Count</b> 32768 | <b>Owner</b> CKP                      | <b>Pulse Sequence</b> single_pulse.ex2 |
| <b>Receiver Gain</b> 46.00                               | <b>Solvent</b> CHLOROFORM-d        | <b>Spectrum Offset (Hz)</b> 5410.6274 | <b>Sweep Width (Hz)</b> 16534.39       |

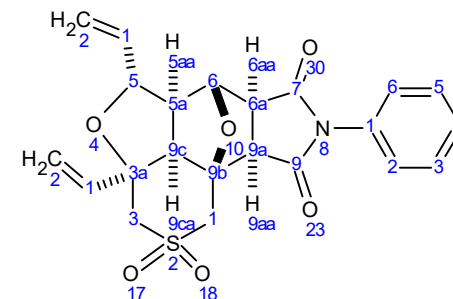

14h

FZ8906-1.JDF

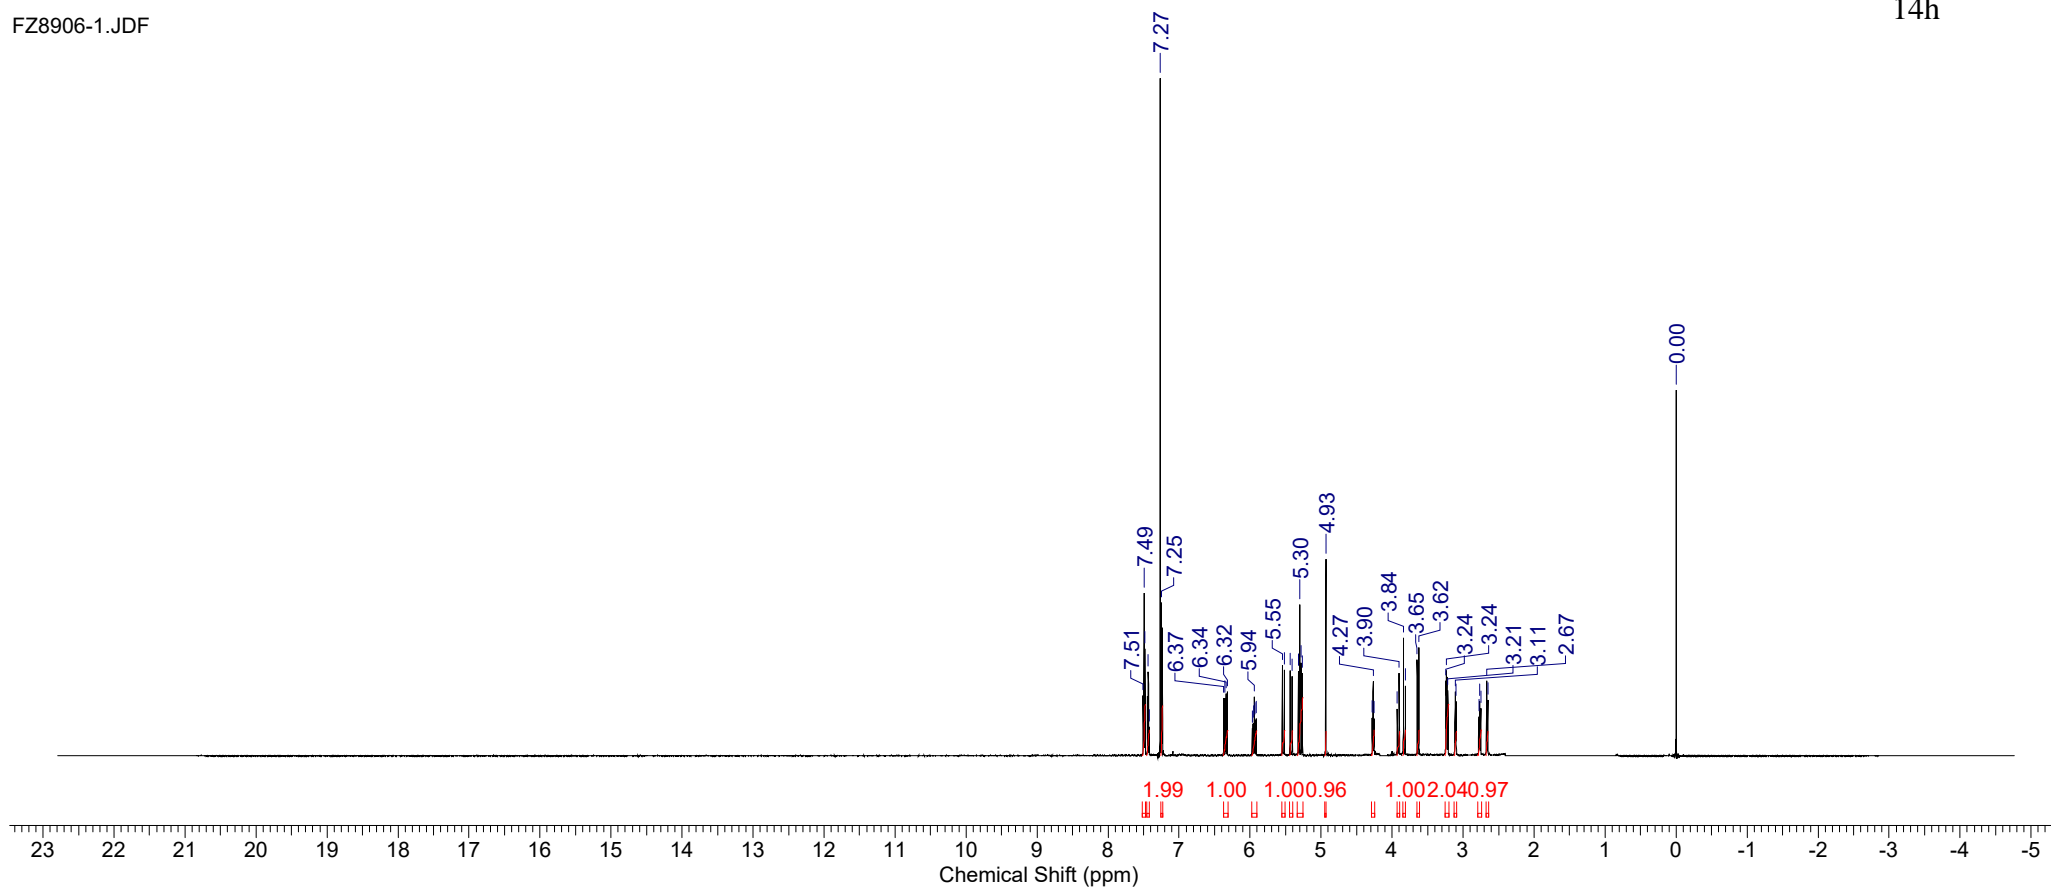

|                                                                  |                    |
|------------------------------------------------------------------|--------------------|
| <b>Formula</b> C <sub>22</sub> H <sub>21</sub> NO <sub>6</sub> S | <b>FW</b> 427.4702 |
|------------------------------------------------------------------|--------------------|

|                                                          |                                    |                                       |                                        |
|----------------------------------------------------------|------------------------------------|---------------------------------------|----------------------------------------|
| <b>Acquisition Time (sec)</b> 1.9818                     | <b>Comment</b> single_pulse        | <b>Date</b> 29 Jul 2020 10:26:15      | <b>Date Stamp</b> 29 Jul 2020 10:27:29 |
| <b>File Name</b> C:\USERS\Лабa534\DOWNLOADS\FZ8906-1.JDF | <b>Frequency (MHz)</b> 600.17      | <b>Nucleus</b> 1H                     | <b>Number of Transients</b> 8          |
| <b>Origin</b> ECA 600                                    | <b>Original Points Count</b> 32768 | <b>Owner</b> CKP                      | <b>Pulse Sequence</b> single_pulse.ex2 |
| <b>Receiver Gain</b> 46.00                               | <b>Solvent</b> CHLOROFORM-d        | <b>Spectrum Offset (Hz)</b> 5410.6274 | <b>Sweep Width (Hz)</b> 16534.39       |

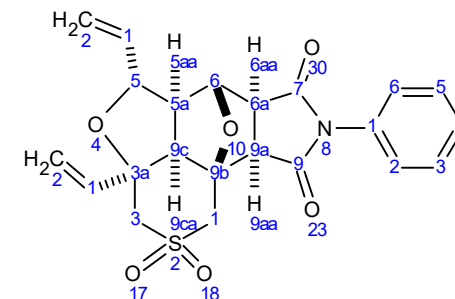

14h

FZ8906-1.JDF

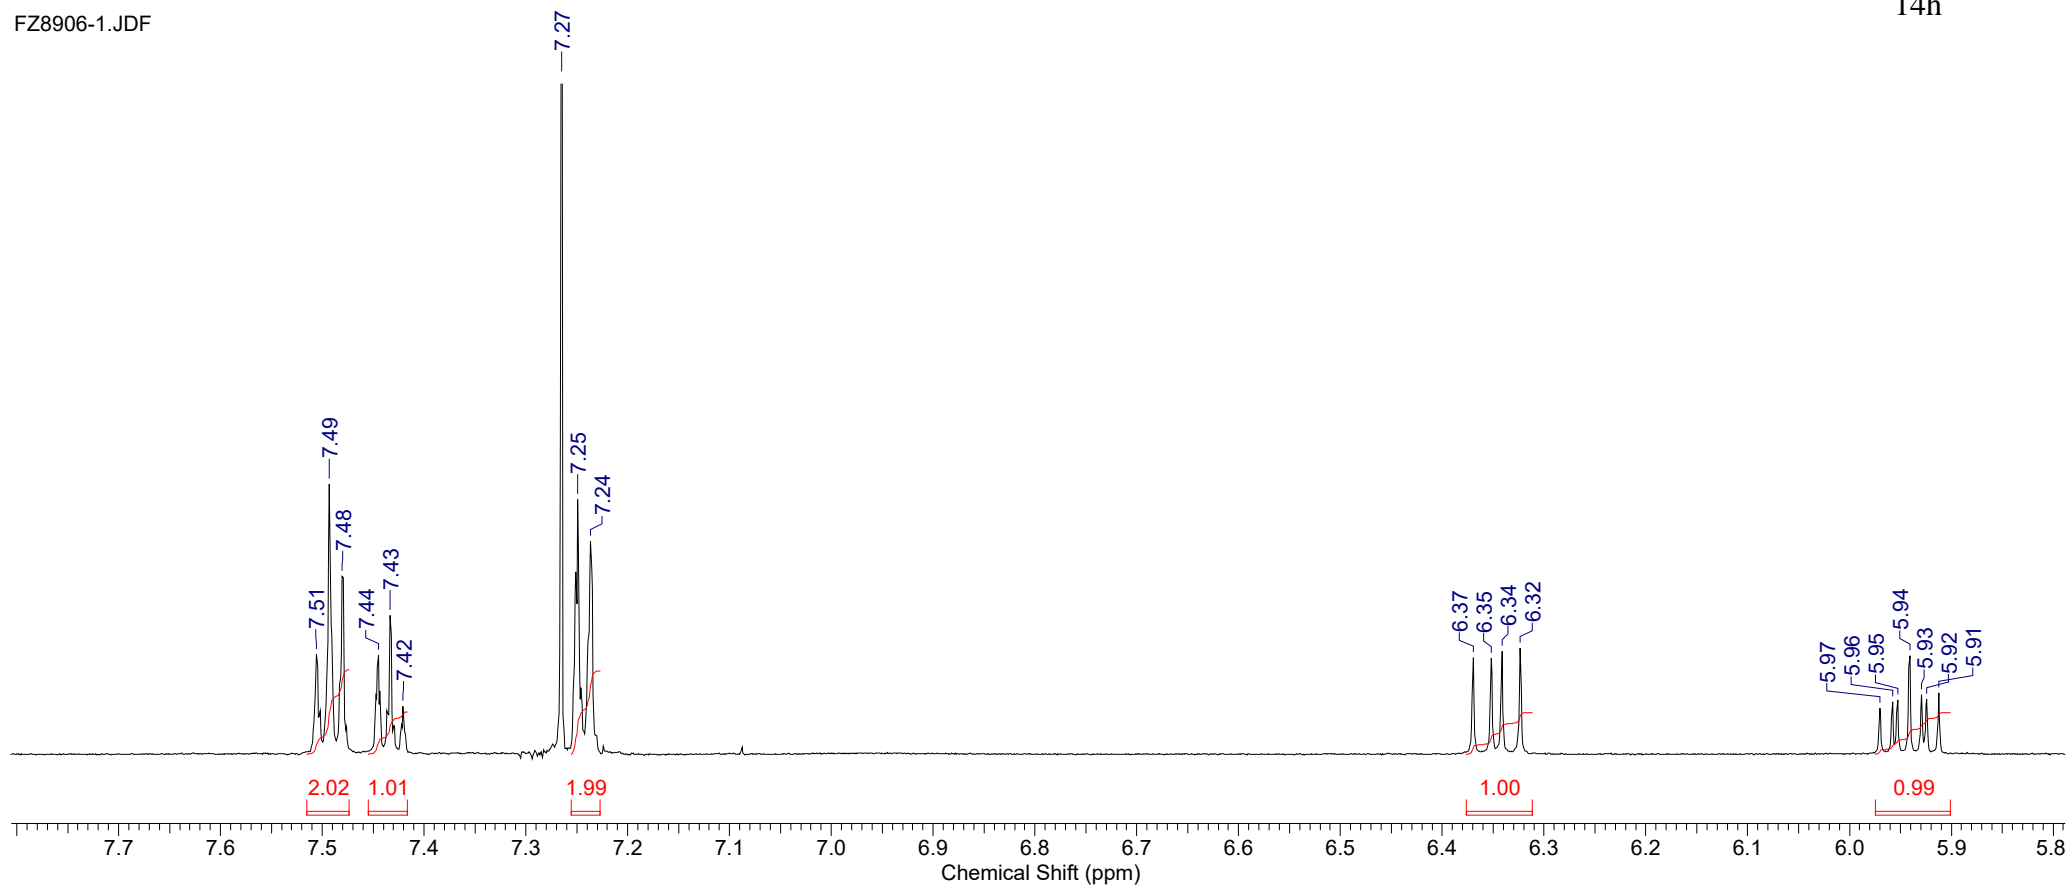

|                                                                  |                    |
|------------------------------------------------------------------|--------------------|
| <b>Formula</b> C <sub>22</sub> H <sub>21</sub> NO <sub>6</sub> S | <b>FW</b> 427.4702 |
|------------------------------------------------------------------|--------------------|

|                                                          |                                    |                                       |                                        |
|----------------------------------------------------------|------------------------------------|---------------------------------------|----------------------------------------|
| <b>Acquisition Time (sec)</b> 1.9818                     | <b>Comment</b> single_pulse        | <b>Date</b> 29 Jul 2020 10:26:15      | <b>Date Stamp</b> 29 Jul 2020 10:27:29 |
| <b>File Name</b> C:\USERS\Лабa534\DOWNLOADS\FZ8906-1.JDF | <b>Frequency (MHz)</b> 600.17      | <b>Nucleus</b> 1H                     | <b>Number of Transients</b> 8          |
| <b>Origin</b> ECA 600                                    | <b>Original Points Count</b> 32768 | <b>Owner</b> CKP                      | <b>Pulse Sequence</b> single_pulse.ex2 |
| <b>Receiver Gain</b> 46.00                               | <b>Solvent</b> CHLOROFORM-d        | <b>Spectrum Offset (Hz)</b> 5410.6274 | <b>Sweep Width (Hz)</b> 16534.39       |



14h

FZ8906-1.JDF

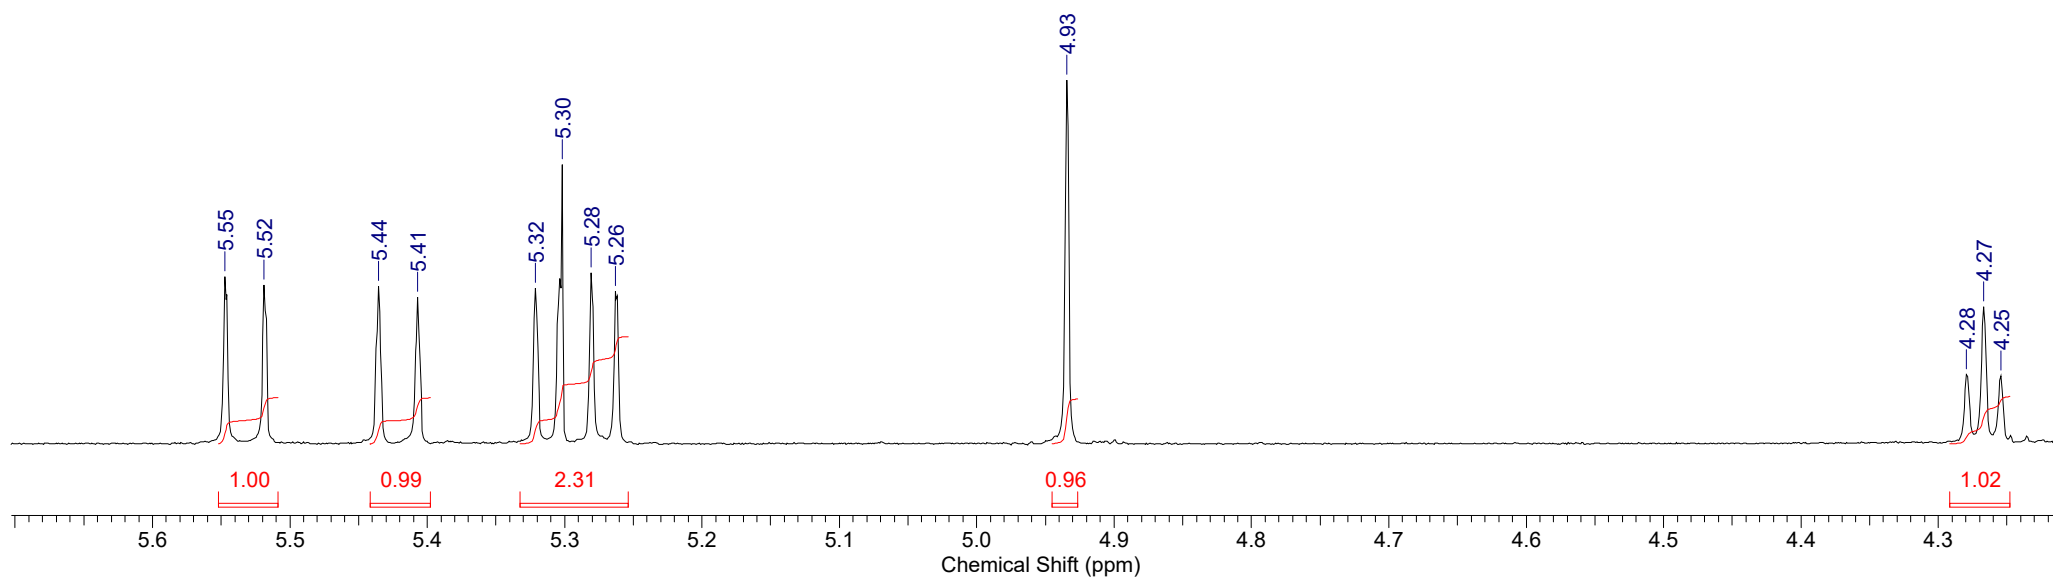

|                                                                  |                    |
|------------------------------------------------------------------|--------------------|
| <b>Formula</b> C <sub>22</sub> H <sub>21</sub> NO <sub>6</sub> S | <b>FW</b> 427.4702 |
|------------------------------------------------------------------|--------------------|

|                                                          |                                    |                                       |                                        |
|----------------------------------------------------------|------------------------------------|---------------------------------------|----------------------------------------|
| <b>Acquisition Time (sec)</b> 1.9818                     | <b>Comment</b> single_pulse        | <b>Date</b> 29 Jul 2020 10:26:15      | <b>Date Stamp</b> 29 Jul 2020 10:27:29 |
| <b>File Name</b> C:\USERS\Лабa534\DOWNLOADS\FZ8906-1.JDF | <b>Frequency (MHz)</b> 600.17      | <b>Nucleus</b> 1H                     | <b>Number of Transients</b> 8          |
| <b>Origin</b> ECA 600                                    | <b>Original Points Count</b> 32768 | <b>Owner</b> CKP                      | <b>Pulse Sequence</b> single_pulse.ex2 |
| <b>Receiver Gain</b> 46.00                               | <b>Solvent</b> CHLOROFORM-d        | <b>Spectrum Offset (Hz)</b> 5410.6274 | <b>Sweep Width (Hz)</b> 16534.39       |



14h

FZ8906-1.JDF

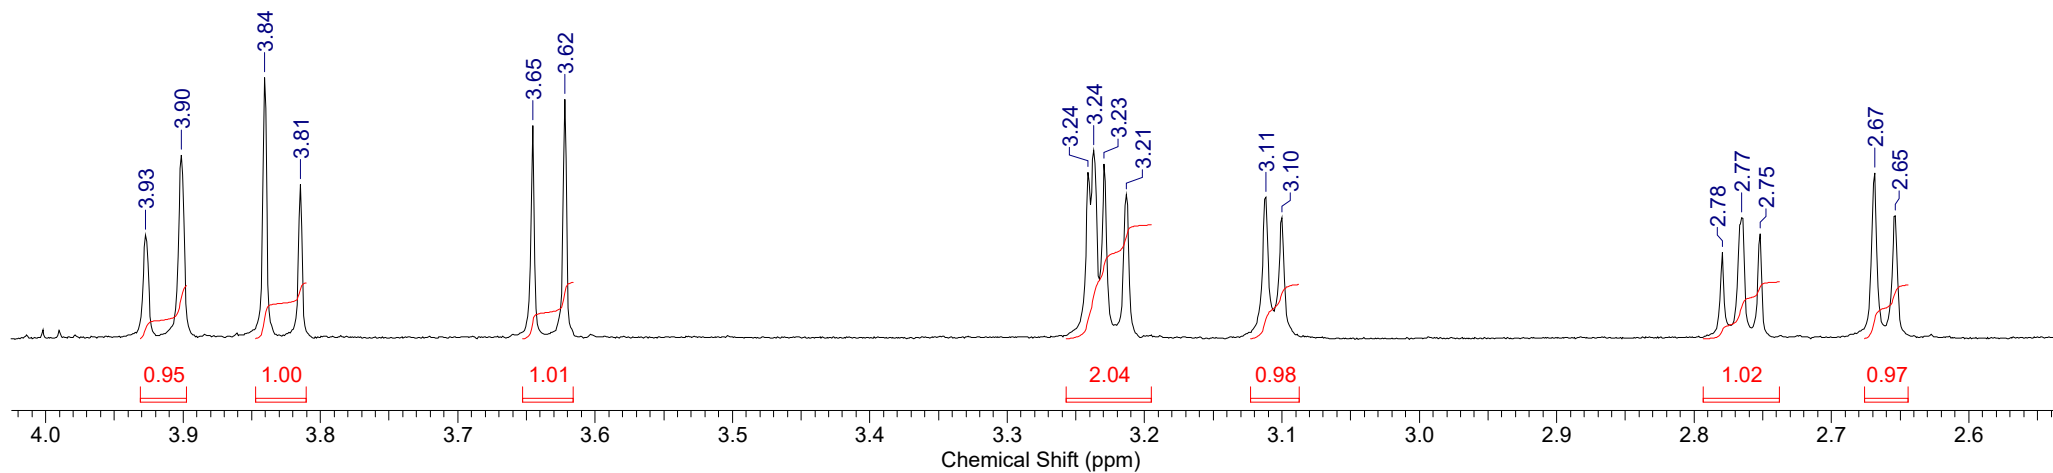

|                                                                  |                    |
|------------------------------------------------------------------|--------------------|
| <b>Formula</b> C <sub>22</sub> H <sub>21</sub> NO <sub>6</sub> S | <b>FW</b> 427.4702 |
|------------------------------------------------------------------|--------------------|

|                                        |                                                          |                                        |
|----------------------------------------|----------------------------------------------------------|----------------------------------------|
| <b>Acquisition Time (sec)</b> 0.6921   | <b>Comment</b> single pulse decoupled gated NOE          | <b>Date</b> 05 Aug 2020 10:05:02       |
| <b>Date Stamp</b> 05 Aug 2020 10:05:43 | <b>File Name</b> C:\USERS\la6a534\DOWNLOADS\FZ8906-2.JDF |                                        |
| <b>Frequency (MHz)</b> 150.91          | <b>Nucleus</b> 13C                                       | <b>Number of Transients</b> 3311       |
| <b>Original Points Count</b> 32768     | <b>Owner</b> CKP                                         | <b>Points Count</b> 32768              |
| <b>Receiver Gain</b> 56.00             | <b>Solvent</b> CHLOROFORM-d                              | <b>Pulse Sequence</b> single pulse dec |
| <b>Sweep Width (Hz)</b> 47348.49       |                                                          | <b>Spectrum Offset (Hz)</b> 15080.7979 |

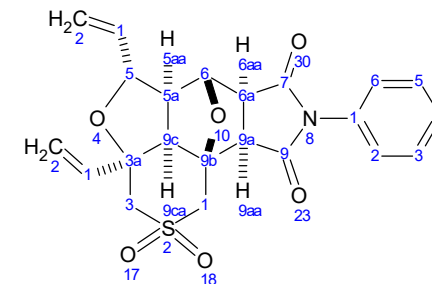

14h

FZ8906-2.JDF

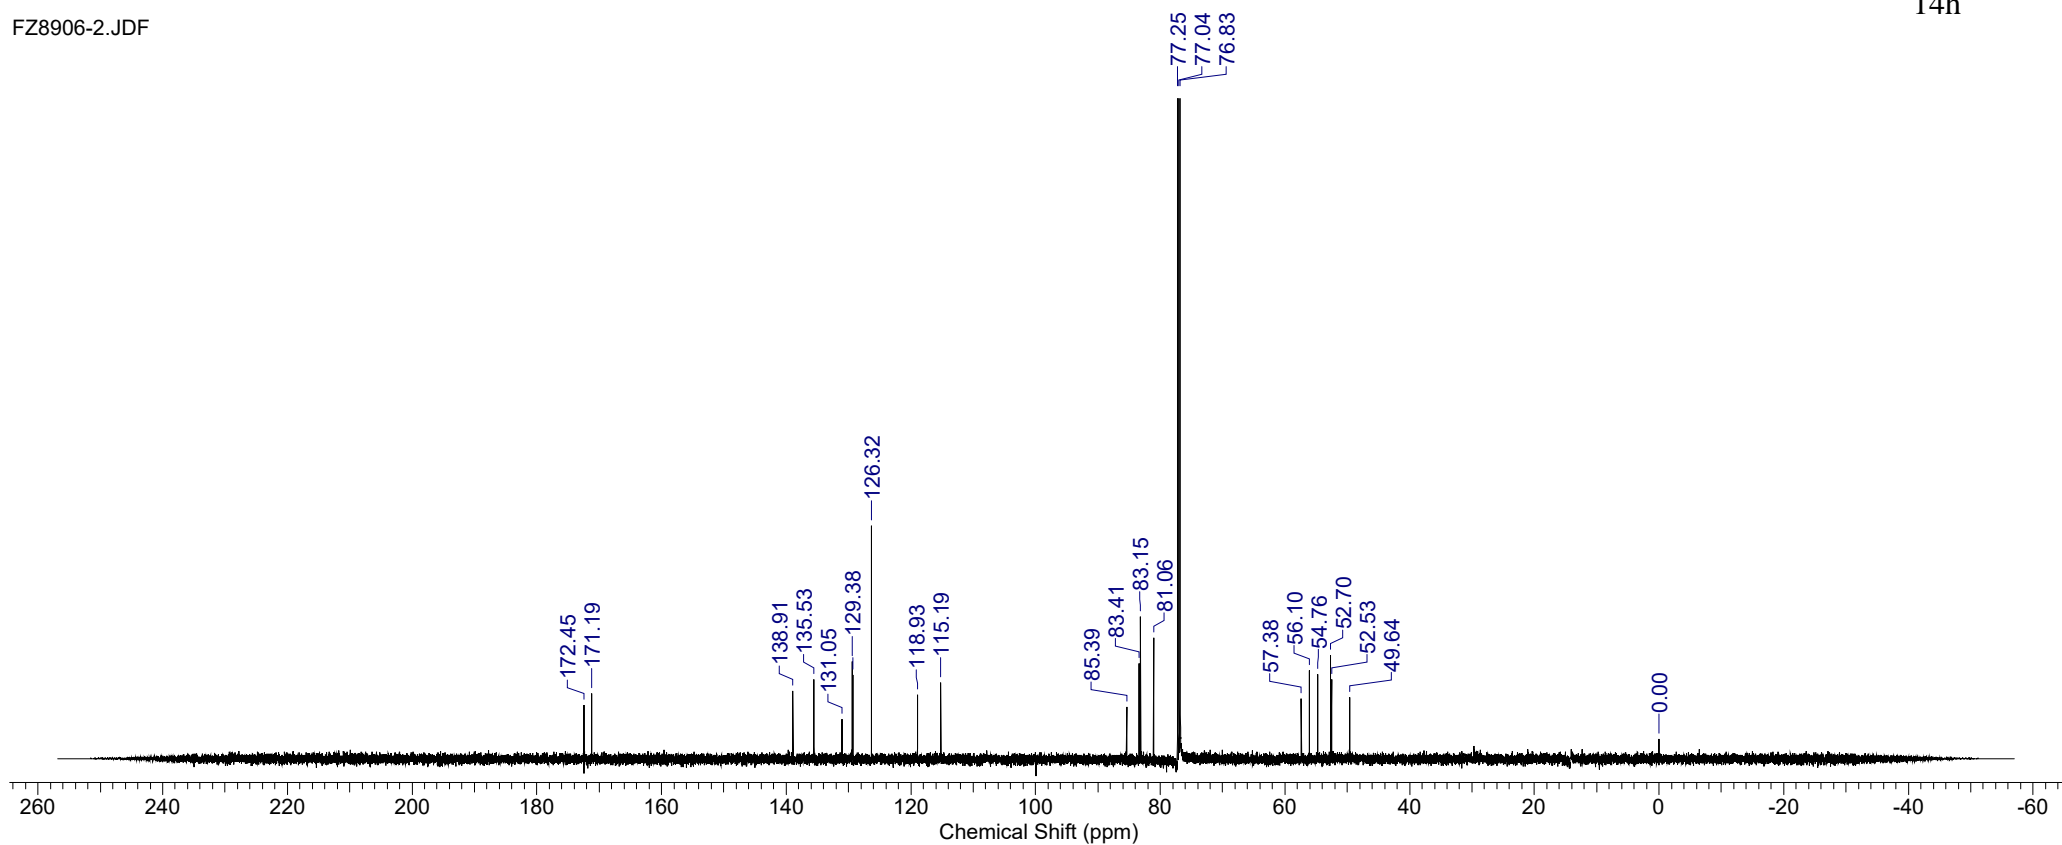

|                                                                  |                    |
|------------------------------------------------------------------|--------------------|
| <b>Formula</b> C <sub>22</sub> H <sub>21</sub> NO <sub>6</sub> S | <b>FW</b> 427.4702 |
|------------------------------------------------------------------|--------------------|

|                                        |                                                           |                                        |
|----------------------------------------|-----------------------------------------------------------|----------------------------------------|
| <b>Acquisition Time (sec)</b> 0.6921   | <b>Comment</b> single pulse decoupled gated NOE           | <b>Date</b> 05 Aug 2020 10:05:02       |
| <b>Date Stamp</b> 05 Aug 2020 10:05:43 | <b>File Name</b> C:\USERS\l1a6a534\DOWNLOADS\FZ8906-2.JDF |                                        |
| <b>Frequency (MHz)</b> 150.91          | <b>Nucleus</b> 13C                                        | <b>Number of Transients</b> 3311       |
| <b>Original Points Count</b> 32768     | <b>Owner</b> CKP                                          | <b>Points Count</b> 32768              |
| <b>Receiver Gain</b> 56.00             | <b>Solvent</b> CHLOROFORM-d                               | <b>Pulse Sequence</b> single pulse dec |
| <b>Sweep Width (Hz)</b> 47348.49       |                                                           | <b>Spectrum Offset (Hz)</b> 15080.7979 |



14h

FZ8906-2.JDF

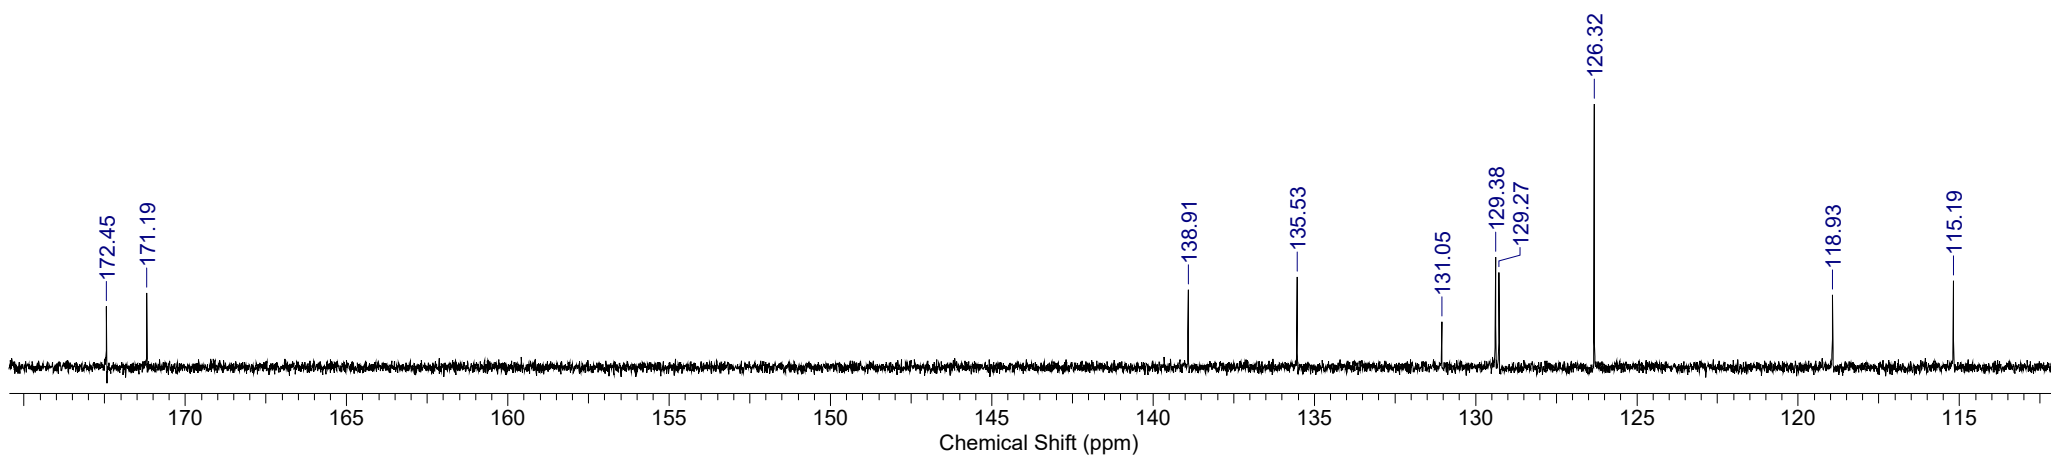

|                                                                  |                    |
|------------------------------------------------------------------|--------------------|
| <b>Formula</b> C <sub>22</sub> H <sub>21</sub> NO <sub>6</sub> S | <b>FW</b> 427.4702 |
|------------------------------------------------------------------|--------------------|

|                                        |                                                          |                                        |
|----------------------------------------|----------------------------------------------------------|----------------------------------------|
| <b>Acquisition Time (sec)</b> 0.6921   | <b>Comment</b> single pulse decoupled gated NOE          | <b>Date</b> 05 Aug 2020 10:05:02       |
| <b>Date Stamp</b> 05 Aug 2020 10:05:43 | <b>File Name</b> C:\USERS\la6a534\DOWNLOADS\FZ8906-2.JDF |                                        |
| <b>Frequency (MHz)</b> 150.91          | <b>Nucleus</b> 13C                                       | <b>Number of Transients</b> 3311       |
| <b>Original Points Count</b> 32768     | <b>Owner</b> CKP                                         | <b>Points Count</b> 32768              |
| <b>Receiver Gain</b> 56.00             | <b>Solvent</b> CHLOROFORM-d                              | <b>Pulse Sequence</b> single pulse dec |
| <b>Sweep Width (Hz)</b> 47348.49       |                                                          | <b>Spectrum Offset (Hz)</b> 15080.7979 |



14h

FZ8906-2.JDF

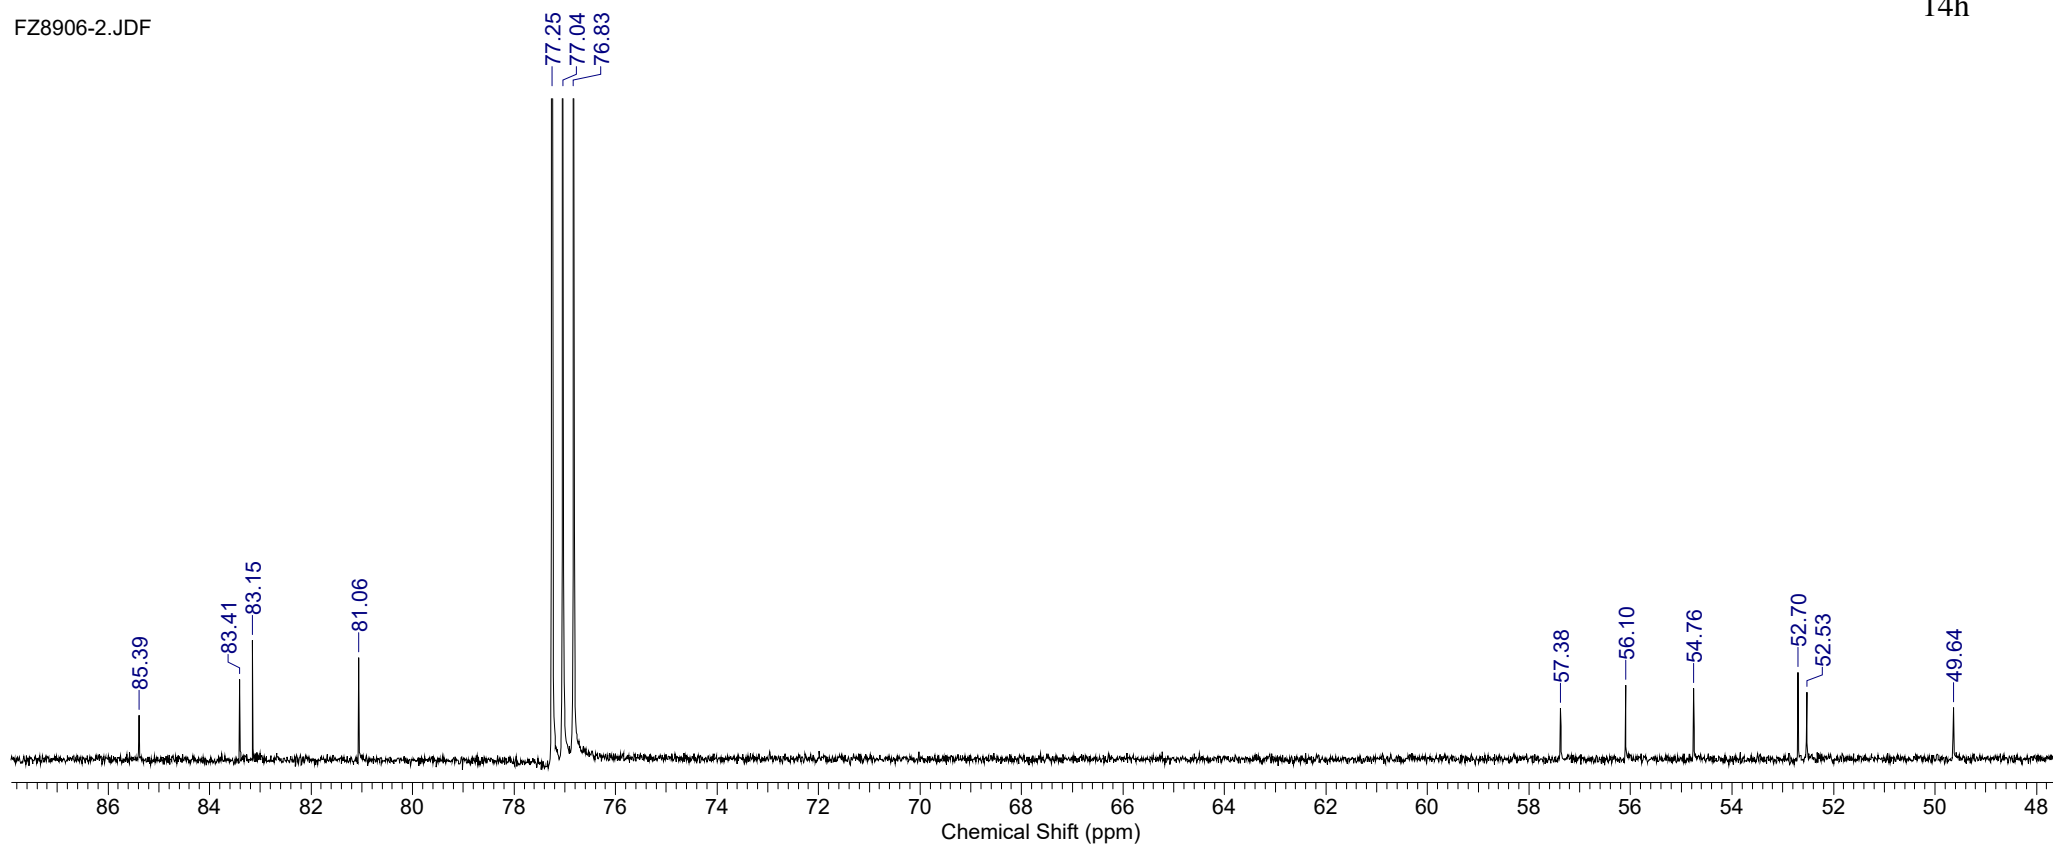

Supplement: d0nj04528d1.pdf [file d0nj04528d1.pdf]
